# Supplementary material
Source: PubMed Central journal article supplement (PMC7856046)
Supplement: NIHMS1645826-supplement-Online_Supplement.pdf [file NIHMS1645826-supplement-Online_Supplement.pdf]

## ONLINE SUPPLEMENT

### Gut Microbiota and Host Plasma Metabolites in Association with Blood Pressure in Chinese Adults

Yiqing Wang, Huijun Wang, Annie Green Howard, Matthew C. B. Tsilimigras, Christy L. Avery, Katie A. Meyer, Wei Sha, Shan Sun, Jiguo Zhang, Chang Su, Zhihong Wang, Anthony A. Fodor, Bing Zhang\*, Penny Gordon-Larsen\*

Please Address Correspondence and Reprint Requests To:

Penny Gordon-Larsen, PhD  
University of North Carolina at Chapel Hill; Carolina Population Center  
123 West Franklin Street  
Chapel Hill, NC 27516  
Phone: (W) 919-962-6110; Fax: 919-966-9156  
Email: [pglarsen@unc.edu](mailto:pglarsen@unc.edu)

#### Tables:

**Table S1.** Taxa scores for principal coordinate analysis (PCoA) axes

**Table S2.** Metabolite loadings for principal component analysis (PCA) axes

**Table S3.** Characteristics of the analysis sample (n=1082)

**Table S4.** Associations between gut microbial within-person diversity ( $\alpha$ -diversity) measures with systolic and diastolic blood pressure (SBP and DBP)

**Table S5.** Association between gut microbial principal coordinates analysis (PCoA) axes with systolic and diastolic blood pressure (SBP and DBP, mmHg), Coefficient (95% CI)

**Table S6.** Association between specific microbiota with systolic and diastolic blood pressure (SBP and DBP)

**Table S7.** Post-hoc analysis of the association between within-person diversity ( $\alpha$ -diversity) measures with systolic and diastolic blood pressure (SBP and DBP)

**Table S8.** Post-hoc analysis of the association between gut microbial principal coordinates analysis (PCoA) axes with systolic and diastolic blood pressure (SBP and DBP, mmHg), Coefficient (95% CI)

**Table S9.** Post-hoc analysis of the association between specific microbiota with systolic and diastolic blood pressure (SBP and DBP)

**Table S10.** Association between individual metabolites ( $\leq 25\%$  values below detection limits) with systolic and diastolic blood pressure (SBP and DBP)

**Table S11.** Association between individual metabolites [ $25-50\%$  values below detection limits (BLD), reference=BLD] with systolic and diastolic blood pressure (SBP and DBP)

**Table S12.** Association between individual metabolites [ $>50\%$  values below detection limits (BLD), reference=BLD] with systolic and diastolic blood pressure (SBP and DBP)

**Table S13.** Post-hoc analysis of the association between metabolite patterns with systolic and diastolic blood pressure (SBP and DBP, mmHg), Coefficient (95% CI)

**Table S14.** Post-hoc analysis of the association between individual metabolites with systolic and diastolic blood pressure (SBP and DBP)

**Table S15.** Metabolic pathways not associated with systolic or diastolic blood pressure (SBP and DBP)

**Table S16.** Characteristics of the analysis sample (n=355)

**Table S17.** Associations between the fourth principal coordinate analysis (PCoA) axis with systolic blood pressure (SBP)- or diastolic blood pressure (DBP)-associated metabolites

### Figures:

**Figure S1.** Sample flow chart

**Figure S2.** Microbial between-person diversity ( $\beta$ -diversity) assessed using principal coordinate analysis (PCoA) by diastolic blood pressure (DBP)

**Figure S3.** Root mean square errors (RMSE) for (A) systolic blood pressure (SBP) and (B) diastolic blood pressure (DBP) estimated by random forest regression with 5 iterations of 2-fold cross-validation (5x2 cv)

### Reference:

1. Sumner LW, Amberg A, Barrett D, Beale MH, Beger R, Daykin CA, Fan TW-M, Fiehn O, Goodacre R and Griffin JL. Proposed minimum reporting standards for chemical analysis. *Metabolomics*. 2007;3:211-221.

**Table S1. Taxa scores for principal coordinate analysis (PCoA) axes**

| <b>MDS1</b> | <b>MDS2</b> | <b>MDS3</b> | <b>MDS4</b> | <b>kingdom</b> | <b>phylum</b>  | <b>class</b>    | <b>order</b>       | <b>family</b>        | <b>genus</b>                 |
|-------------|-------------|-------------|-------------|----------------|----------------|-----------------|--------------------|----------------------|------------------------------|
| 0.44        | 0.45        | -           | -           | Archaea        | Euryarchaeota  | Methanobacteria | Methanobacteriales | Methanobacteriaceae  | Methanobrevibacter           |
| -           | -           | -           | 0.67        | Bacteria       | Actinobacteria | Actinobacteria  | Actinomycetales    | Micrococcaceae       | Rothia                       |
| 0.48        | -           | -           | -           | Bacteria       | Actinobacteria | Actinobacteria  | Actinomycetales    | Nocardiaceae         | Rhodococcus                  |
| -0.70       | -           | -0.64       | -           | Bacteria       | Actinobacteria | Actinobacteria  | Bifidobacteriales  | Bifidobacteriaceae   | Bifidobacterium              |
| -           | -           | 0.57        | -0.86       | Bacteria       | Actinobacteria | Coriobacteriia  | Coriobacteriales   | Coriobacteriaceae    | Adlercreutzia                |
| -           | -           | 0.80        | -0.51       | Bacteria       | Actinobacteria | Coriobacteriia  | Coriobacteriales   | Coriobacteriaceae    | Eggerthella                  |
| 0.45        | -           | -           | -           | Bacteria       | Bacteroidetes  | Bacteroidia     | Bacteroidales      |                      |                              |
| 0.46        | -           | -           | -           | Bacteria       | Bacteroidetes  | Bacteroidia     | Bacteroidales      | [Barnesiellaceae]    |                              |
| 0.42        | -           | -           | -           | Bacteria       | Bacteroidetes  | Bacteroidia     | Bacteroidales      | [Odoribacteraceae]   | Odoribacter                  |
| 0.74        | -           | -           | -           | Bacteria       | Bacteroidetes  | Bacteroidia     | Bacteroidales      | [Paraprevotellaceae] | [Prevotella]                 |
| 0.96        | 0.85        | -           | -           | Bacteria       | Bacteroidetes  | Bacteroidia     | Bacteroidales      | Bacteroidaceae       | Bacteroides                  |
| 1.01        | 0.67        | -           | -           | Bacteria       | Bacteroidetes  | Bacteroidia     | Bacteroidales      | Porphyromonadaceae   | Parabacteroides              |
| 1.33        | 0.70        | -           | -           | Bacteria       | Bacteroidetes  | Bacteroidia     | Bacteroidales      | Prevotellaceae       | Prevotella                   |
| 0.77        | -           | -           | -           | Bacteria       | Bacteroidetes  | Bacteroidia     | Bacteroidales      | Rikenellaceae        |                              |
| 1.20        | -           | -           | -           | Bacteria       | Bacteroidetes  | Bacteroidia     | Bacteroidales      | S24-7                |                              |
| -           | -           | -0.67       | -           | Bacteria       | Cyanobacteria  | 4C0d-2          | YS2                |                      |                              |
| 0.45        | -           | -           | -           | Bacteria       | Firmicutes     | Bacilli         | Bacillales         |                      |                              |
| -           | -           | -           | 0.49        | Bacteria       | Firmicutes     | Bacilli         | Lactobacillales    | Lactobacillaceae     | Lactobacillus                |
| -           | -0.63       | 0.73        | 0.80        | Bacteria       | Firmicutes     | Bacilli         | Lactobacillales    | Leuconostocaceae     |                              |
| -           | -0.69       | 0.93        | -           | Bacteria       | Firmicutes     | Bacilli         | Lactobacillales    | Streptococcaceae     | Lactococcus                  |
| 0.45        | 0.50        | -           | -           | Bacteria       | Firmicutes     | Clostridia      | Clostridiales      | Christensenellaceae  |                              |
| -           | -           | 0.49        | -           | Bacteria       | Firmicutes     | Clostridia      | Clostridiales      | Clostridiaceae       | Clostridium                  |
| -           | -           | 0.70        | -           | Bacteria       | Firmicutes     | Clostridia      | Clostridiales      | Eubacteriaceae       | Pseudoramibacter_Eubacterium |
| -           | 0.51        | -           | -           | Bacteria       | Firmicutes     | Clostridia      | Clostridiales      | Lachnospiraceae      | Anaerostipes                 |
| -           | -           | 0.43        | -0.41       | Bacteria       | Firmicutes     | Clostridia      | Clostridiales      | Lachnospiraceae      | Blautia                      |
| -           | -           | -           | -0.52       | Bacteria       | Firmicutes     | Clostridia      | Clostridiales      | Lachnospiraceae      | Coproccoccus                 |
| -           | 0.83        | -           | -           | Bacteria       | Firmicutes     | Clostridia      | Clostridiales      | Lachnospiraceae      | Lachnospira                  |
| -           | 0.46        | -           | -           | Bacteria       | Firmicutes     | Clostridia      | Clostridiales      | Lachnospiraceae      | Roseburia                    |

|      |       |       |       |            |                 |                     |                    |                       |                       |
|------|-------|-------|-------|------------|-----------------|---------------------|--------------------|-----------------------|-----------------------|
| -    | -     | 0.63  | -     | Bacteria   | Firmicutes      | Clostridia          | Clostridiales      | Peptococcaceae        | Peptococcus           |
| -    | -0.43 | -     | -     | Bacteria   | Firmicutes      | Clostridia          | Clostridiales      | Peptostreptococcaceae |                       |
| -    | 0.55  | -     | -     | Bacteria   | Firmicutes      | Clostridia          | Clostridiales      | Ruminococcaceae       |                       |
| 0.51 | 0.80  | -     | -     | Bacteria   | Firmicutes      | Clostridia          | Clostridiales      | Ruminococcaceae       | Faecalibacterium      |
| 0.57 | 0.50  | -     | -     | Bacteria   | Firmicutes      | Clostridia          | Clostridiales      | Ruminococcaceae       | Oscillospira          |
| -    | 0.45  | -     | -     | Bacteria   | Firmicutes      | Clostridia          | Clostridiales      | Ruminococcaceae       | Ruminococcus          |
| 0.52 | 0.67  | -     | -     | Bacteria   | Firmicutes      | Clostridia          | Clostridiales      | Veillonellaceae       | Phascolarctobacterium |
| -    | -     | -     | 0.48  | Bacteria   | Firmicutes      | Clostridia          | Clostridiales      | Veillonellaceae       | Veillonella           |
| 0.45 | -     | -     | -     | Bacteria   | Firmicutes      | Erysipelotrichi     | Erysipelotrichales | Erysipelotrichaceae   | [Eubacterium]         |
| 0.58 | -     | -0.74 | -     | Bacteria   | Firmicutes      | Erysipelotrichi     | Erysipelotrichales | Erysipelotrichaceae   | Catenibacterium       |
| -    | -     | 0.44  | -     | Bacteria   | Firmicutes      | Erysipelotrichi     | Erysipelotrichales | Erysipelotrichaceae   | Coprobacillus         |
| -    | 0.49  | -     | -     | Bacteria   | Firmicutes      | Erysipelotrichi     | Erysipelotrichales | Erysipelotrichaceae   | Holdemanina           |
| -    | -     | 0.57  | 0.54  | Bacteria   | Fusobacteria    | Fusobacteriia       | Fusobacteriales    | Fusobacteriaceae      | Fusobacterium         |
| 0.56 | -     | -     | -     | Bacteria   | Proteobacteria  | Alphaproteobacteria | Rhizobiales        | Bradyrhizobiaceae     |                       |
| 0.54 | -     | -     | -     | Bacteria   | Proteobacteria  | Alphaproteobacteria | Rhodobacterales    | Rhodobacteraceae      |                       |
| 0.62 | -     | -     | -     | Bacteria   | Proteobacteria  | Betaproteobacteria  | Burkholderiales    | Alcaligenaceae        | Sutterella            |
| 0.80 | -0.70 | -     | -     | Bacteria   | Proteobacteria  | Betaproteobacteria  | Burkholderiales    | Comamonadaceae        |                       |
| 1.06 | -1.01 | -     | -     | Bacteria   | Proteobacteria  | Betaproteobacteria  | Burkholderiales    | Comamonadaceae        | Delftia               |
| 0.40 | -0.46 | -     | -     | Bacteria   | Proteobacteria  | Betaproteobacteria  | Burkholderiales    | Comamonadaceae        | Other                 |
| 1.24 | -1.03 | -     | -0.50 | Bacteria   | Proteobacteria  | Betaproteobacteria  | Burkholderiales    | Oxalobacteraceae      | Ralstonia             |
| 0.43 | -     | -     | -     | Bacteria   | Proteobacteria  | Deltaproteobacteria | Desulfovibrionales | Desulfovibrionaceae   | Desulfovibrio         |
| -    | -     | 0.50  | 0.71  | Bacteria   | Proteobacteria  | Gammaproteobacteria | Enterobacteriales  | Enterobacteriaceae    |                       |
| -    | -     | -     | 0.71  | Bacteria   | Proteobacteria  | Gammaproteobacteria | Enterobacteriales  | Enterobacteriaceae    | Serratia              |
| -    | -     | 0.56  | 0.81  | Bacteria   | Proteobacteria  | Gammaproteobacteria | Enterobacteriales  | Enterobacteriaceae    | Other                 |
| 0.65 | -0.48 | -     | -     | Bacteria   | Proteobacteria  | Gammaproteobacteria | Pseudomonadales    | Moraxellaceae         | Acinetobacter         |
| 0.51 | -0.63 | -     | -     | Bacteria   | Proteobacteria  | Gammaproteobacteria | Xanthomonadales    | Xanthomonadaceae      |                       |
| 0.74 | 0.42  | -     | -0.41 | Bacteria   | Tenericutes     | Mollicutes          | RF39               |                       |                       |
| 0.44 | -     | -     | -     | Bacteria   | TM7             | TM7-3               |                    |                       |                       |
| -    | 0.79  | -     | -     | Bacteria   | Verrucomicrobia | Verrucomicrobiae    | Verrucomicrobiales | Verrucomicrobiaceae   | Akkermansia           |
| 0.84 | -     | -     | -     | Unassigned | Other           | Other               | Other              | Other                 | Other                 |

MDS, multidimensional scaling. Principal coordinate analysis (PCoA) was performed for 1,008 taxa based on Bray-Curtis distance matrix in 1,003 participants. The first four axes each explained 8.61, 5.58, 3.54, and 3.16 percent variance of gut microbiota, respectively. Taxa with scores > 0.40 or ≤ -0.40 are shown here. Taxa are ordered alphabetically.

**Table S2. Metabolite loadings for principal component analysis (PCA) axes**

| Axis 1 | Axis 2 | Axis 3 | Metabolites                                 | Class       | Pathway                                         |
|--------|--------|--------|---------------------------------------------|-------------|-------------------------------------------------|
| -      | 0.58   | -      | (2 or 3)-decenoate (10:1n8 or n7)           | Lipid       | Medium Chain Fatty Acid                         |
| 0.45   | -      | -      | (2,4 or 2,5)-dimethylphenol sulfate         | Xenobiotics | Food Component/Plant                            |
| -      | 0.60   | -      | (R)-3-hydroxybutyrylcarnitine               | Lipid       | Fatty Acid Metabolism (Acyl Carnitine, Hydroxy) |
| -      | 0.45   | -      | (S)-3-hydroxybutyrylcarnitine               | Lipid       | Fatty Acid Metabolism (Acyl Carnitine, Hydroxy) |
| 0.44   | -      | -      | (S)- $\alpha$ -Amino- $\omega$ -caprolactam | Xenobiotics | Food Component/Plant                            |
| -      | -      | 0.59   | 1-(1-enyl-oleoyl)-GPE (P-18:1)*             | Lipid       | Lysoplasmalogen                                 |
| -      | -      | 0.52   | 1-(1-enyl-palmitoyl)-GPC (P-16:0)*          | Lipid       | Lysoplasmalogen                                 |
| -      | -      | 0.59   | 1-(1-enyl-palmitoyl)-GPE (P-16:0)*          | Lipid       | Lysoplasmalogen                                 |
| -      | -      | 0.54   | 1-(1-enyl-stearoyl)-GPE (P-18:0)*           | Lipid       | Lysoplasmalogen                                 |
| -      | 0.79   | -      | 10-heptadecenoate (17:1n7)                  | Lipid       | Long Chain Monounsaturated Fatty Acid           |
| -      | 0.74   | -      | 10-nonadecenoate (19:1n9)                   | Lipid       | Long Chain Monounsaturated Fatty Acid           |
| -      | 0.47   | -      | 10-undecenoate (11:1n1)                     | Lipid       | Medium Chain Fatty Acid                         |
| -      | -      | 0.51   | 13-HODE + 9-HODE                            | Lipid       | Fatty Acid, Monohydroxy                         |
| -      | 0.56   | -      | 16-hydroxypalmitate                         | Lipid       | Fatty Acid, Monohydroxy                         |
| -      | -      | -0.41  | 17 $\alpha$ -hydroxypregnenolone 3-sulfate  | Lipid       | Pregnenolone Steroids                           |
| -      | 0.55   | -      | 1-arachidonoyl-GPI* (20:4)*                 | Lipid       | Lysophospholipid                                |
| -      | 0.62   | -      | 1-arachidonoylglycerol (20:4)               | Lipid       | Monoacylglycerol                                |
| 0.60   | -      | -      | 1-carboxyethylisoleucine                    | Amino Acid  | Leucine, Isoleucine and Valine Metabolism       |
| 0.54   | -      | -      | 1-carboxyethylleucine                       | Amino Acid  | Leucine, Isoleucine and Valine Metabolism       |
| 0.66   | -      | -      | 1-carboxyethylphenylalanine                 | Amino Acid  | Phenylalanine Metabolism                        |
| 0.54   | -      | -      | 1-carboxyethyltyrosine                      | Amino Acid  | Tyrosine Metabolism                             |
| 0.55   | -      | -      | 1-carboxyethylvaline                        | Amino Acid  | Leucine, Isoleucine and Valine Metabolism       |
| -      | 0.66   | -      | 1-dihomo-linolenylglycerol (20:3)           | Lipid       | Monoacylglycerol                                |
| -      | 0.64   | -      | 1-dihomo-linoleoylglycerol (20:2)           | Lipid       | Monoacylglycerol                                |
| -      | 0.49   | -      | 1-docosahexaenoylglycerol (22:6)            | Lipid       | Monoacylglycerol                                |
| -      | 0.56   | -      | 1-linolenoylglycerol (18:3)                 | Lipid       | Monoacylglycerol                                |
| -      | 0.63   | -      | 1-linoleoylglycerol (18:2)                  | Lipid       | Monoacylglycerol                                |
| 0.52   | -      | -      | 1-linoleoyl-GPE (18:2)*                     | Lipid       | Lysophospholipid                                |
| 0.55   | -      | -      | 1-methyl-4-imidazoleacetate                 | Amino Acid  | Histidine Metabolism                            |
| 0.44   | -      | -      | 1-methyladenosine                           | Nucleotide  | Purine Metabolism, Adenine containing           |
| 0.62   | -      | -      | 1-methylhistidine                           | Amino Acid  | Histidine Metabolism                            |
| -      | 0.43   | -      | 1-myristoylglycerol (14:0)                  | Lipid       | Monoacylglycerol                                |
| -      | 0.67   | -      | 1-oleoylglycerol (18:1)                     | Lipid       | Monoacylglycerol                                |
| 0.42   | -      | -      | 1-oleoyl-GPC (18:1)                         | Lipid       | Lysophospholipid                                |
| 0.61   | -      | -      | 1-oleoyl-GPE (18:1)                         | Lipid       | Lysophospholipid                                |
| -      | 0.56   | -      | 1-palmitoleoylglycerol (16:1)*              | Lipid       | Monoacylglycerol                                |
| 0.42   | -      | -      | 1-palmitoyl-2-linoleoyl-GPE (16:0/18:2)     | Lipid       | Phosphatidylethanolamine (PE)                   |

|      |      |       |                                                  |             |                                                  |
|------|------|-------|--------------------------------------------------|-------------|--------------------------------------------------|
| 0.43 | -    | -     | 1-palmitoyl-2-oleoyl-GPE (16:0/18:1)             | Lipid       | Phosphatidylethanolamine (PE)                    |
| -    | 0.57 | -     | 1-palmitoylglycerol (16:0)                       | Lipid       | Monoacylglycerol                                 |
| -    | -    | 0.46  | 1-palmitoyl-GPI* (16:0)                          | Lipid       | Lysophospholipid                                 |
| 0.44 | -    | -     | 1-ribosyl-imidazoleacetate*                      | Amino Acid  | Histidine Metabolism                             |
| 0.43 | -    | -     | 1-stearoyl-2-linoleoyl-GPE (18:0/18:2)*          | Lipid       | Phosphatidylethanolamine (PE)                    |
| 0.45 | -    | -     | 1-stearoyl-2-oleoyl-GPC (18:0/18:1)              | Lipid       | Phosphatidylcholine (PC)                         |
| 0.48 | -    | -     | 1-stearoyl-2-oleoyl-GPE (18:0/18:1)              | Lipid       | Phosphatidylethanolamine (PE)                    |
| -    | -    | 0.51  | 1-stearoyl-GPC (18:0)                            | Lipid       | Lysophospholipid                                 |
| -    | -    | 0.52  | 1-stearoyl-GPI (18:0)                            | Lipid       | Lysophospholipid                                 |
| 0.76 | -    | -     | 2,3-dihydroxy-5-methylthio-4-pentenoate (DMTPA)* | Amino Acid  | Methionine, Cysteine, SAM and Taurine Metabolism |
| -    | 0.40 | -     | 2-arachidonoylglycerol (20:4)                    | Lipid       | Monoacylglycerol                                 |
| 0.48 | -    | -     | 2-hydroxy-3-methylvalerate                       | Amino Acid  | Leucine, Isoleucine and Valine Metabolism        |
| -    | 0.57 | -     | 2-hydroxybutyrate/2-hydroxyisobutyrate           | Amino Acid  | Glutathione Metabolism                           |
| 0.45 | -    | -     | 2-hydroxyfluorene sulfate                        | Xenobiotics | Tobacco Metabolite                               |
| -    | 0.48 | -     | 2-hydroxypalmitate                               | Lipid       | Fatty Acid, Monohydroxy                          |
| 0.45 | -    | -     | 2-hydroxysebacic acid                            | Lipid       | Fatty Acid, Dicarboxylate                        |
| -    | -    | -0.55 | 2-ketocaprylate                                  | Amino Acid  | Leucine, Isoleucine and Valine Metabolism        |
| -    | 0.58 | -     | 2-linoleoylglycerol (18:2)                       | Lipid       | Monoacylglycerol                                 |
| 0.55 | -    | -     | 2-methylbutyrylcarnitine (C5)                    | Amino Acid  | Leucine, Isoleucine and Valine Metabolism        |
| -    | 0.65 | -     | 2-oleoylglycerol (18:1)                          | Lipid       | Monoacylglycerol                                 |
| -    | 0.46 | -     | 2-palmitoleoylglycerol (16:1)*                   | Lipid       | Monoacylglycerol                                 |
| 0.69 | -    | -     | 3-(3-amino-3-carboxypropyl)uridine*              | Nucleotide  | Pyrimidine Metabolism, Uracil containing         |
| 0.58 | -    | -     | 3-(4-hydroxyphenyl)lactate (HPLA)                | Amino Acid  | Tyrosine Metabolism                              |
| 0.52 | -    | -     | 3-amino-2-piperidone                             | Amino Acid  | Urea cycle; Arginine and Proline Metabolism      |
| 0.54 | -    | -     | 3-hydroxy-2-ethylpropionate                      | Amino Acid  | Leucine, Isoleucine and Valine Metabolism        |
| 0.67 | -    | -     | 3-hydroxy-3-methylglutarate                      | Lipid       | Mevalonate Metabolism                            |
| -    | 0.60 | -     | 3-hydroxybutyrate (BHBA)                         | Lipid       | Ketone Bodies                                    |
| -    | 0.66 | -     | 3-hydroxydecanoate                               | Lipid       | Fatty Acid, Monohydroxy                          |
| -    | 0.56 | -     | 3-hydroxyhexanoate                               | Lipid       | Fatty Acid, Monohydroxy                          |
| -    | 0.63 | -     | 3-hydroxylaurate                                 | Lipid       | Fatty Acid, Monohydroxy                          |
| -    | 0.56 | -     | 3-hydroxyoctanoate                               | Lipid       | Fatty Acid, Monohydroxy                          |
| -    | 0.56 | -     | 3-hydroxyoctanoylcarnitine (1)                   | Lipid       | Fatty Acid Metabolism (Acyl Carnitine, Hydroxy)  |
| -    | 0.56 | -     | 3-hydroxyoctanoylcarnitine (2)                   | Lipid       | Fatty Acid Metabolism (Acyl Carnitine, Hydroxy)  |
| 0.53 | -    | -     | 3-hydroxypyridine sulfate                        | Xenobiotics | Chemical                                         |
| 0.41 | -    | -     | 3-indoleglyoxylic acid                           | Xenobiotics | Food Component/Plant                             |
| 0.57 | -    | -     | 3-methoxytyramine sulfate                        | Amino Acid  | Tyrosine Metabolism                              |
| 0.47 | -    | -     | 3-methyl catechol sulfate (1)                    | Xenobiotics | Benzoate Metabolism                              |
| -    | -    | -0.65 | 3-methyl-2-oxobutyrate                           | Amino Acid  | Leucine, Isoleucine and Valine Metabolism        |

|      |      |       |                                                  |                                         |                                                                                                  |
|------|------|-------|--------------------------------------------------|-----------------------------------------|--------------------------------------------------------------------------------------------------|
| -    | -    | -0.59 | 3-methyl-2-oxovalerate                           | Amino Acid                              | Leucine, Isoleucine and Valine Metabolism                                                        |
| 0.43 | -    | -     | 4-acetylphenyl sulfate                           | Xenobiotics                             | Benzoate Metabolism                                                                              |
| -    | -    | 0.51  | 4-guanidinobutanoate                             | Amino Acid                              | Guanidino and Acetamido Metabolism                                                               |
| -    | -    | 0.59  | 4-HDoHE                                          | Lipid                                   | Docosanoid<br>Leucine, Isoleucine and Valine Metabolism                                          |
| -    | -    | -0.60 | 4-methyl-2-oxopentanoate                         | Amino Acid                              | Leucine, Isoleucine and Valine Metabolism                                                        |
| 0.53 | -    | -     | 4-vinylphenol sulfate                            | Xenobiotics                             | Benzoate Metabolism                                                                              |
| 0.65 | -    | -     | 5-(galactosylhydroxy)-L-lysine                   | Amino Acid                              | Lysine Metabolism                                                                                |
| 0.70 | -    | -     | 5,6-dihydrouridine                               | Nucleotide                              | Pyrimidine Metabolism, Uracil containing                                                         |
| -    | -    | -0.45 | 5alpha-androstan-3beta,17beta-diol disulfate     | Lipid                                   | Androgenic Steroids                                                                              |
| -    | 0.58 | -     | 5-dodecenoate (12:1n7)                           | Lipid                                   | Medium Chain Fatty Acid<br>Fatty Acid Metabolism (Acyl Carnitine, Monounsaturated)               |
| -    | 0.50 | -     | 5-dodecenoylcarnitine (C12:1)                    | Lipid                                   | Medium Chain Fatty Acid<br>Fatty Acid Metabolism (Acyl Carnitine, Monounsaturated)               |
| -    | -    | 0.57  | 5-HEPE                                           | Lipid                                   | Eicosanoid                                                                                       |
| -    | -    | 0.61  | 5-HETE                                           | Lipid                                   | Eicosanoid                                                                                       |
| -    | -    | 0.59  | 5-HETrE                                          | Lipid                                   | Eicosanoid                                                                                       |
| 0.41 | -    | -     | 5-hydroxylysine                                  | Amino Acid                              | Lysine Metabolism<br>Methionine, Cysteine, SAM and Taurine Metabolism                            |
| 0.44 | -    | -     | 5-methylthioribose                               | Amino Acid                              | Methionine, Cysteine, SAM and Taurine Metabolism                                                 |
| 0.48 | -    | -     | 5-methyluridine (ribothymidine)                  | Nucleotide                              | Pyrimidine Metabolism, Uracil containing                                                         |
| 0.53 | -    | -     | 7-methylguanine                                  | Nucleotide                              | Purine Metabolism, Guanine containing                                                            |
| -    | 0.50 | -     | acetylcarnitine (C2)                             | Lipid                                   | Fatty Acid Metabolism (Acyl Carnitine, Short Chain)                                              |
| 0.40 | -    | -     | acisoga                                          | Amino Acid                              | Polyamine Metabolism                                                                             |
| -    | 0.71 | -     | adrenate (22:4n6)                                | Lipid                                   | Long Chain Polyunsaturated Fatty Acid (n3 and n6)<br>Leucine, Isoleucine and Valine Metabolism   |
| 0.44 | -    | -     | alpha-hydroxyisovalerate                         | Amino Acid                              | Leucine, Isoleucine and Valine Metabolism                                                        |
| -    | -    | -0.57 | alpha-ketoglutarate                              | Energy<br>Cofactors and<br>Vitamins     | TCA Cycle                                                                                        |
| -    | -    | -0.48 | alpha-tocopherol                                 | Vitamins                                | Tocopherol Metabolism                                                                            |
| -    | -    | -0.49 | androstenediol (3alpha, 17alpha) monosulfate (3) | Lipid                                   | Androgenic Steroids                                                                              |
| -    | -    | -0.50 | androstenediol (3beta,17beta) disulfate (1)      | Lipid                                   | Androgenic Steroids                                                                              |
| -    | 0.41 | -0.47 | androstenediol (3beta,17beta) disulfate (2)      | Lipid                                   | Androgenic Steroids                                                                              |
| -    | -    | -0.48 | androstenediol (3beta,17beta) monosulfate (1)    | Lipid                                   | Androgenic Steroids                                                                              |
| 0.57 | -    | -     | arabitol/xylitol                                 | Carbohydrate                            | Pentose Metabolism                                                                               |
| -    | 0.47 | -     | arachidate (20:0)                                | Lipid                                   | Long Chain Saturated Fatty Acid<br>Long Chain Polyunsaturated Fatty Acid (n3 and n6)             |
| -    | 0.66 | -     | arachidonate (20:4n6)                            | Lipid                                   | Long Chain Polyunsaturated Fatty Acid (n3 and n6)<br>Urea cycle; Arginine and Proline Metabolism |
| 0.46 | -    | -     | argininate*                                      | Amino Acid<br>Cofactors and<br>Vitamins | Urea cycle; Arginine and Proline Metabolism                                                      |
| 0.49 | -    | -     | ascorbic acid 3-sulfate*                         | Vitamins                                | Ascorbate and Aldarate Metabolism                                                                |
| -    | -    | 0.40  | behenoyl sphingomyelin (d18:1/22:0)*             | Lipid                                   | Sphingomyelins                                                                                   |
| 0.43 | -    | -     | beta-citrylglutamate                             | Amino Acid                              | Glutamate Metabolism                                                                             |

|      |      |       |                                                                 |                                   |                                                              |
|------|------|-------|-----------------------------------------------------------------|-----------------------------------|--------------------------------------------------------------|
| -    | -    | -0.52 | bilirubin                                                       | Cofactors and Vitamins            | Hemoglobin and Porphyrin Metabolism                          |
| -    | -    | -0.45 | bilirubin (E,E)*                                                | Cofactors and Vitamins            | Hemoglobin and Porphyrin Metabolism                          |
| -    | -    | -0.49 | bilirubin degradation product, C17H18N2O4 (2)**                 | Partially Characterized Molecules | Partially Characterized Molecules                            |
| -    | 0.62 | -     | branched-chain, straight-chain, or cyclopropyl 12:1 fatty acid* | Partially Characterized Molecules | Partially Characterized Molecules                            |
| -    | -    | 0.60  | butyrate/isobutyrate (4:0)                                      | Lipid                             | Short Chain Fatty Acid                                       |
| -    | 0.49 | -     | caprate (10:0)                                                  | Lipid                             | Medium Chain Fatty Acid                                      |
| -    | -    | 0.46  | caproate (6:0)                                                  | Lipid                             | Medium Chain Fatty Acid                                      |
| -    | 0.42 | -     | cerotoylcarnitine (C26)*                                        | Lipid                             | Fatty Acid Metabolism (Acyl Carnitine, Long Chain Saturated) |
| 0.72 | -    | -     | C-glycosyltryptophan                                            | Amino Acid                        | Tryptophan Metabolism                                        |
| -    | -    | 0.42  | cholesterol                                                     | Lipid                             | Sterol                                                       |
| 0.47 | -    | -     | choline                                                         | Lipid                             | Phospholipid Metabolism                                      |
| -    | 0.61 | -     | cis-4-decenoate                                                 | Lipid                             | Medium Chain Fatty Acid                                      |
| -    | 0.44 | -     | cis-4-decenoylcarnitine (C10:1)                                 | Lipid                             | Fatty Acid Metabolism (Acyl Carnitine, Monounsaturated)      |
| 0.54 | -    | -     | citrulline                                                      | Amino Acid                        | Urea cycle; Arginine and Proline Metabolism                  |
| 0.61 | -    | -     | creatinine                                                      | Amino Acid                        | Creatine Metabolism                                          |
| 0.47 | -    | -     | cystathionine                                                   | Amino Acid                        | Methionine, Cysteine, SAM and Taurine Metabolism             |
| -    | -    | -0.53 | cysteine                                                        | Amino Acid                        | Methionine, Cysteine, SAM and Taurine Metabolism             |
| -    | -    | 0.47  | cysteine sulfinic acid                                          | Amino Acid                        | Methionine, Cysteine, SAM and Taurine Metabolism             |
| -    | 0.48 | -     | decanoylcarnitine (C10)                                         | Lipid                             | Fatty Acid Metabolism (Acyl Carnitine, Medium Chain)         |
| -    | -    | -0.42 | dehydroepiandrosterone sulfate (DHEA-S)                         | Lipid                             | Androgenic Steroids                                          |
| -    | 0.74 | -     | dihomolinoleate (20:2n6)                                        | Lipid                             | Long Chain Polyunsaturated Fatty Acid (n3 and n6)            |
| -    | 0.73 | -     | dihomolinolenate (20:3n3 or 3n6)                                | Lipid                             | Long Chain Polyunsaturated Fatty Acid (n3 and n6)            |
| 0.70 | -    | -     | dimethylarginine (ADMA + SDMA)                                  | Amino Acid                        | Urea cycle; Arginine and Proline Metabolism                  |
| -    | 0.50 | -     | docosadienoate (22:2n6)                                         | Lipid                             | Long Chain Polyunsaturated Fatty Acid (n3 and n6)            |
| -    | 0.70 | -     | docosahexaenoate (DHA; 22:6n3)                                  | Lipid                             | Long Chain Polyunsaturated Fatty Acid (n3 and n6)            |
| -    | 0.78 | -     | docosapentaenoate (DPA; 22:5n3)                                 | Lipid                             | Long Chain Polyunsaturated Fatty Acid (n3 and n6)            |
| -    | 0.54 | -     | docosatrienoate (22:3n3)                                        | Lipid                             | Long Chain Polyunsaturated Fatty Acid (n3 and n6)            |
| -    | 0.62 | -     | dodecadienoate (12:2)*                                          | Lipid                             | Fatty Acid, Dicarboxylate                                    |
| 0.47 | -    | -     | dopamine 3-O-sulfate                                            | Amino Acid                        | Tyrosine Metabolism                                          |
| -    | 0.47 | -     | eicosapentaenoate (EPA; 20:5n3)                                 | Lipid                             | Long Chain Polyunsaturated Fatty Acid (n3 and n6)            |
| -    | 0.57 | -     | eicosenoate (20:1n9 or 1n11)                                    | Lipid                             | Long Chain Monounsaturated Fatty Acid                        |
| 0.52 | -    | -     | formiminoglutamate                                              | Amino Acid                        | Histidine Metabolism                                         |



|      |      |      |                                                                     |                                   |                                                                                 |
|------|------|------|---------------------------------------------------------------------|-----------------------------------|---------------------------------------------------------------------------------|
| 0.42 | -    | -    | glucuronate                                                         | Carbohydrate                      | Aminosugar Metabolism                                                           |
| -    | 0.42 | -    | glutamate                                                           | Amino Acid                        | Glutamate Metabolism                                                            |
| -    | 0.47 | -    | glutamine conjugate of C6H10O2 (2)*                                 | Partially Characterized Molecules | Partially Characterized Molecules                                               |
| 0.41 | -    | -    | glutaryl carnitine (C5)                                             | Amino Acid                        | Lysine Metabolism                                                               |
| -    | 0.65 | -    | glycerol                                                            | Lipid                             | Glycerolipid Metabolism                                                         |
| -    | -    | 0.53 | glycerophosphoethanolamine                                          | Lipid                             | Phospholipid Metabolism                                                         |
| 0.43 | -    | -    | guaiacol sulfate                                                    | Xenobiotics                       | Benzoate Metabolism                                                             |
| -    | -    | 0.42 | heptanoate (7:0)                                                    | Lipid                             | Medium Chain Fatty Acid<br>Long Chain Polyunsaturated Fatty Acid (n3 and n6)    |
| -    | 0.74 | -    | hexadecadienoate (16:2n6)                                           | Lipid                             | Fatty Acid, Dicarboxylate                                                       |
| -    | 0.47 | -    | hexadecanedioate (C16)                                              | Lipid                             | Fatty Acid Metabolism (Acyl Carnitine, Medium Chain)                            |
| -    | 0.54 | -    | hexanoyl carnitine (C6)                                             | Lipid                             | Fatty Acid Metabolism (Acyl Glutamine)                                          |
| -    | 0.52 | -    | hexanoyl glutamine                                                  | Lipid                             | Urea cycle; Arginine and Proline Metabolism                                     |
| 0.57 | -    | -    | homocitrulline                                                      | Amino Acid                        | Alanine and Aspartate Metabolism                                                |
| 0.69 | -    | -    | hydroxyasparagine                                                   | Amino Acid                        | Lysine Metabolism                                                               |
| 0.71 | -    | -    | hydroxy-N6,N6,N6-trimethyllysine*<br>hydroxypalmitoyl sphingomyelin | Amino Acid                        | Sphingomyelins                                                                  |
| -    | -    | 0.42 | (d18:1/16:0(OH))**                                                  | Lipid                             | Histidine Metabolism                                                            |
| 0.46 | -    | -    | imidazole lactate                                                   | Amino Acid                        | Tryptophan Metabolism                                                           |
| 0.64 | -    | -    | indole lactate                                                      | Amino Acid                        | Leucine, Isoleucine and Valine Metabolism                                       |
| 0.42 | -    | -    | isoleucine                                                          | Amino Acid                        | Leucine, Isoleucine and Valine Metabolism                                       |
| -    | -    | 0.59 | isovalerate (C5)                                                    | Amino Acid                        | Tryptophan Metabolism                                                           |
| 0.59 | -    | -    | kynurenine                                                          | Amino Acid                        | Glycolysis, Gluconeogenesis, and Pyruvate Metabolism                            |
| 0.45 | -    | -    | lactate                                                             | Carbohydrate                      | Medium Chain Fatty Acid<br>Fatty Acid Metabolism (Acyl Carnitine, Medium Chain) |
| -    | 0.43 | -    | laurate (12:0)                                                      | Lipid                             | Eicosanoid                                                                      |
| -    | 0.49 | -    | lauryl carnitine (C12)                                              | Lipid                             | Long Chain Polyunsaturated Fatty Acid (n3 and n6)                               |
| -    | -    | 0.63 | leukotriene B4                                                      | Lipid                             | Long Chain Polyunsaturated Fatty Acid (n3 and n6)                               |
| -    | 0.80 | -    | linoleate (18:2n6)                                                  | Lipid                             | Endocannabinoid                                                                 |
| -    | 0.72 | -    | linolenate (18:3n3 or 3n6)                                          | Lipid                             | Fatty Acid Metabolism (Acyl Carnitine, Polyunsaturated)                         |
| -    | 0.54 | -    | linoleoyl ethanolamide                                              | Lipid                             | Long Chain Saturated Fatty Acid                                                 |
| -    | 0.41 | -    | linoleoyl carnitine (C18:2)*                                        | Lipid                             | Methionine, Cysteine, SAM and Taurine Metabolism                                |
| -    | 0.74 | -    | margarate (17:0)                                                    | Lipid                             | Methionine, Cysteine, SAM and Taurine Metabolism                                |
| 0.44 | -    | -    | methionine sulfone                                                  | Amino Acid                        | Chemical                                                                        |
| -    | -    | 0.61 | methionine sulfoxide                                                | Amino Acid                        | Long Chain Saturated Fatty Acid                                                 |
| 0.44 | -    | -    | methylnaphthyl sulfate (2)*                                         | Xenobiotics                       | Long Chain Monounsaturated Fatty Acid                                           |
| -    | 0.70 | -    | myristate (14:0)                                                    | Lipid                             |                                                                                 |
| -    | 0.61 | -    | myristoleate (14:1n5)                                               | Lipid                             |                                                                                 |

|      |      |      |                                              |              |                                                              |
|------|------|------|----------------------------------------------|--------------|--------------------------------------------------------------|
| -    | 0.51 | -    | myristoleoylcarnitine (C14:1)*               | Lipid        | Fatty Acid Metabolism (Acyl Carnitine, Monounsaturated)      |
| -    | -    | 0.47 | myristoyl dihydrosphingomyelin (d18:0/14:0)* | Lipid        | Dihydrosphingomyelins                                        |
| -    | 0.53 | -    | myristoylcarnitine (C14)                     | Lipid        | Fatty Acid Metabolism (Acyl Carnitine, Long Chain Saturated) |
| 0.60 | -    | -    | N,N,N-trimethyl-alanylproline betaine (TMAP) | Amino Acid   | Urea cycle; Arginine and Proline Metabolism                  |
| 0.73 | -    | -    | N,N-dimethyl-pro-pro                         | Peptide      | Modified Peptides                                            |
| 0.57 | -    | -    | N1-methylinosine                             | Nucleotide   | Purine Metabolism, (Hypo)Xanthine/Inosine containing         |
| 0.60 | -    | -    | N2,N2-dimethylguanosine                      | Nucleotide   | Purine Metabolism, Guanine containing                        |
| 0.56 | -    | -    | N2,N5-diacetylornithine                      | Amino Acid   | Urea cycle; Arginine and Proline Metabolism                  |
| 0.58 | -    | -    | N6,N6,N6-trimethyllysine                     | Amino Acid   | Lysine Metabolism                                            |
| 0.69 | -    | -    | N6-acetyllysine                              | Amino Acid   | Lysine Metabolism                                            |
| 0.65 | -    | -    | N6-carbamoylthreonyladenosine                | Nucleotide   | Purine Metabolism, Adenine containing                        |
| 0.69 | -    | -    | N-acetylalanine                              | Amino Acid   | Alanine and Aspartate Metabolism                             |
| 0.65 | -    | -    | N-acetylglucosamine/N-acetylgalactosamine    | Carbohydrate | Aminosugar Metabolism                                        |
| 0.42 | -    | -    | N-acetyl-isoputrescine*                      | Amino Acid   | Polyamine Metabolism                                         |
| 0.65 | -    | -    | N-acetylneuraminate                          | Carbohydrate | Aminosugar Metabolism                                        |
| 0.50 | -    | -    | N-acetylputrescine                           | Amino Acid   | Polyamine Metabolism                                         |
| 0.67 | -    | -    | N-acetylserine                               | Amino Acid   | Glycine, Serine and Threonine Metabolism                     |
| 0.66 | -    | -    | N-acetyltaurine                              | Amino Acid   | Methionine, Cysteine, SAM and Taurine Metabolism             |
| 0.73 | -    | -    | N-acetylthreonine                            | Amino Acid   | Glycine, Serine and Threonine Metabolism                     |
| 0.42 | -    | -    | N-acetylvaline                               | Amino Acid   | Leucine, Isoleucine and Valine Metabolism                    |
| 0.50 | -    | -    | N-delta-acetylornithine                      | Amino Acid   | Urea cycle; Arginine and Proline Metabolism                  |
| 0.55 | -    | -    | N-formylmethionine                           | Amino Acid   | Methionine, Cysteine, SAM and Taurine Metabolism             |
| -    | 0.46 | -    | N-linoleoyltaurine*                          | Lipid        | Endocannabinoid                                              |
| -    | 0.63 | -    | N-oleoyltaurine                              | Lipid        | Endocannabinoid                                              |
| -    | 0.58 | -    | nonadecanoate (19:0)                         | Lipid        | Long Chain Saturated Fatty Acid                              |
| 0.50 | -    | -    | o-cresol sulfate                             | Xenobiotics  | Benzoate Metabolism                                          |
| -    | 0.48 | -    | octadecanedioate (C18)                       | Lipid        | Fatty Acid, Dicarboxylate                                    |
| -    | 0.51 | -    | octanoylcarnitine (C8)                       | Lipid        | Fatty Acid Metabolism (Acyl Carnitine, Medium Chain)         |
| -    | 0.80 | -    | oleate/vaccenate (18:1)                      | Lipid        | Long Chain Monounsaturated Fatty Acid                        |
| -    | 0.66 | -    | oleoyl ethanolamide                          | Lipid        | Endocannabinoid                                              |
| -    | 0.54 | -    | oleoylcarnitine (C18)                        | Lipid        | Fatty Acid Metabolism (Acyl Carnitine, Monounsaturated)      |
| 0.51 | -    | -    | ornithine                                    | Amino Acid   | Urea cycle; Arginine and Proline Metabolism                  |
| 0.71 | -    | -    | orotidine                                    | Nucleotide   | Pyrimidine Metabolism, Orotate containing                    |
| 0.63 | -    | -    | O-sulfo-L-tyrosine                           | Xenobiotics  | Chemical                                                     |
| -    | 0.80 | -    | palmitate (16:0)                             | Lipid        | Long Chain Saturated Fatty Acid                              |

|      |      |       |                                                     |                        |                                                              |
|------|------|-------|-----------------------------------------------------|------------------------|--------------------------------------------------------------|
| -    | 0.70 | -     | palmitoleate (16:1n7)                               | Lipid                  | Long Chain Monounsaturated Fatty Acid                        |
| -    | 0.55 | -     | palmitoleoylcarnitine (C16:1)*                      | Lipid                  | Fatty Acid Metabolism (Acyl Carnitine, Monounsaturated)      |
| -    | -    | 0.52  | palmitoyl dihydrosphingomyelin (d18:0/16:0)*        | Lipid                  | Dihydrosphingomyelins                                        |
| -    | 0.56 | -     | palmitoyl ethanolamide                              | Lipid                  | Endocannabinoid                                              |
| -    | -    | 0.53  | palmitoyl sphingomyelin (d18:1/16:0)                | Lipid                  | Sphingomyelins                                               |
| -    | 0.50 | -     | palmitoylcarnitine (C16)                            | Lipid                  | Fatty Acid Metabolism (Acyl Carnitine, Long Chain Saturated) |
| 0.48 | -    | -     | pantothenate (Vitamin B5)                           | Cofactors and Vitamins | Pantothenate and CoA Metabolism                              |
| -    | 0.51 | -     | pentadecanoate (15:0)                               | Lipid                  | Long Chain Saturated Fatty Acid                              |
| 0.44 | -    | -     | phenylalanine                                       | Amino Acid             | Phenylalanine Metabolism                                     |
| 0.63 | -    | -     | phenyllactate (PLA)                                 | Amino Acid             | Phenylalanine Metabolism                                     |
| 0.58 | -    | -     | picolinoylglycine                                   | Lipid                  | Fatty Acid Metabolism (Acyl Glycine)                         |
| -    | -    | -0.53 | pregnen-diol disulfate*                             | Lipid                  | Pregnenolone Steroids                                        |
| -    | -    | -0.42 | pregnenediol sulfate (C21H34O5S)*                   | Lipid                  | Pregnenolone Steroids                                        |
| -    | -    | -0.52 | pregnenetriol disulfate*                            | Lipid                  | Pregnenolone Steroids                                        |
| -    | 0.42 | -0.45 | pregnenetriol sulfate*                              | Lipid                  | Pregnenolone Steroids                                        |
| -    | -    | -0.46 | pregnenolone sulfate                                | Lipid                  | Pregnenolone Steroids                                        |
| 0.44 | -    | -     | prolylglycine                                       | Peptide                | Dipeptide                                                    |
| 0.45 | -    | -     | prolylhydroxyproline                                | Amino Acid             | Urea cycle; Arginine and Proline Metabolism                  |
| 0.77 | -    | -     | pseudouridine                                       | Nucleotide             | Pyrimidine Metabolism, Uracil containing                     |
| 0.55 | -    | -     | pyroglutamine*                                      | Amino Acid             | Glutamate Metabolism                                         |
| -    | -    | -0.43 | pyruvate                                            | Carbohydrate           | Glycolysis, Gluconeogenesis, and Pyruvate Metabolism         |
| 0.41 | -    | -     | quinolinate                                         | Cofactors and Vitamins | Nicotinate and Nicotinamide Metabolism                       |
| 0.46 | -    | -     | retinol (Vitamin A)                                 | Cofactors and Vitamins | Vitamin A Metabolism                                         |
| 0.49 | -    | -     | ribitol                                             | Carbohydrate           | Pentose Metabolism                                           |
| 0.49 | -    | -     | S-adenosylhomocysteine (SAH)                        | Amino Acid             | Methionine, Cysteine, SAM and Taurine Metabolism             |
| 0.42 | -    | -     | sebacate (C10-DC)                                   | Lipid                  | Fatty Acid, Dicarboxylate                                    |
| -    | -    | 0.56  | sphingomyelin (d17:1/16:0, d18:1/15:0, d16:1/17:0)* | Lipid                  | Sphingomyelins                                               |
| -    | -    | 0.49  | sphingomyelin (d18:1/14:0, d16:1/16:0)*             | Lipid                  | Sphingomyelins                                               |
| -    | -    | 0.59  | sphingomyelin (d18:1/17:0, d17:1/18:0, d19:1/16:0)  | Lipid                  | Sphingomyelins                                               |
| -    | -    | 0.53  | sphingomyelin (d18:1/18:1, d18:2/18:0)              | Lipid                  | Sphingomyelins                                               |
| -    | -    | 0.55  | sphingomyelin (d18:1/19:0, d19:1/18:0)*             | Lipid                  | Sphingomyelins                                               |
| -    | -    | 0.51  | sphingomyelin (d18:1/20:0, d16:1/22:0)*             | Lipid                  | Sphingomyelins                                               |
| -    | -    | 0.51  | sphingomyelin (d18:1/20:1, d18:2/20:0)*             | Lipid                  | Sphingomyelins                                               |
| -    | -    | 0.57  | sphingomyelin (d18:1/21:0, d17:1/22:0, d16:1/23:0)* | Lipid                  | Sphingomyelins                                               |

|      |      |       |                                                                    |             |                                                      |
|------|------|-------|--------------------------------------------------------------------|-------------|------------------------------------------------------|
| -    | -    | 0.56  | sphingomyelin (d18:1/22:1, d18:2/22:0, d16:1/24:1)*                | Lipid       | Sphingomyelins                                       |
| -    | -    | 0.57  | sphingomyelin (d18:2/14:0, d18:1/14:1)*                            | Lipid       | Sphingomyelins                                       |
| -    | -    | 0.56  | sphingomyelin (d18:2/16:0, d18:1/16:1)*                            | Lipid       | Sphingomyelins                                       |
| -    | -    | 0.42  | sphingomyelin (d18:2/18:1)*                                        | Lipid       | Sphingomyelins                                       |
| -    | -    | 0.59  | sphingomyelin (d18:2/21:0, d16:2/23:0)*                            | Lipid       | Sphingomyelins                                       |
| -    | -    | 0.66  | sphingomyelin (d18:2/23:0, d18:1/23:1, d17:1/24:1)*                | Lipid       | Sphingomyelins                                       |
| -    | -    | 0.52  | sphingomyelin (d18:2/23:1)*                                        | Lipid       | Sphingomyelins                                       |
| -    | -    | 0.45  | sphingomyelin (d18:2/24:1, d18:1/24:2)*                            | Lipid       | Sphingomyelins                                       |
| -    | 0.65 | -     | stearate (18:0)                                                    | Lipid       | Long Chain Saturated Fatty Acid                      |
| -    | 0.59 | -     | stearidonate (18:4n3)                                              | Lipid       | Long Chain Polyunsaturated Fatty Acid (n3 and n6)    |
| -    | -    | 0.44  | stearoyl sphingomyelin (d18:1/18:0)                                | Lipid       | Sphingomyelins                                       |
| 0.44 | -    | -     | suberate (C8-DC)                                                   | Lipid       | Fatty Acid, Dicarboxylate                            |
| 0.57 | -    | -     | succinylcarnitine (C4)                                             | Energy      | TCA Cycle                                            |
| 0.53 | -    | -     | sulfate*                                                           | Xenobiotics | Chemical                                             |
| -    | 0.46 | -     | tetradecadienedioate (C14:2-DC)*                                   | Lipid       | Fatty Acid, Dicarboxylate                            |
| -    | 0.59 | -     | tetradecadienoate (14:2)*                                          | Lipid       | Fatty Acid, Dicarboxylate                            |
| -    | 0.50 | -     | tetradecanedioate (C14)                                            | Lipid       | Fatty Acid, Dicarboxylate                            |
| -    | -    | -0.44 | thioprolin                                                         | Xenobiotics | Chemical                                             |
| -    | -    | 0.46  | tricosanoyl sphingomyelin (d18:1/23:0)*                            | Lipid       | Sphingomyelins                                       |
| -    | 0.42 | -     | tridecenedioate (C13:1-DC)*                                        | Lipid       | Fatty Acid, Dicarboxylate                            |
| 0.44 | -    | -     | tyramine O-sulfate                                                 | Amino Acid  | Tyrosine Metabolism                                  |
| 0.40 | -    | -     | undecanedioate (C11-DC)                                            | Lipid       | Fatty Acid, Dicarboxylate                            |
| 0.45 | -    | -     | urea                                                               | Amino Acid  | Urea cycle; Arginine and Proline Metabolism          |
| -    | 0.41 | -     | urocortisol glucuronide (4) aka tetrahydrocortisol glucuronide (5) | Lipid       | Corticosteroids                                      |
| 0.65 | -    | -     | vanillactate                                                       | Amino Acid  | Tyrosine Metabolism                                  |
| 0.54 | -    | -     | xanthosine                                                         | Nucleotide  | Purine Metabolism, (Hypo)Xanthine/Inosine containing |

Principal component analysis (PCA) was performed on 874 metabolites followed by a varimax rotation in 434 participants. The first three axes (i.e., principal component) each explained 9.63, 4.79, and 4.69 percent variance of metabolites, respectively. Metabolites with scores > 0.40 or ≤ -0.40 are shown here. Metabolites are ordered alphabetically. According to the Metabolomics Standards Initiative,<sup>1</sup> metabolites with Level 1 identification were labeled by their chemical names; metabolites at Level 2 were indicated by "\*" after chemical name; metabolites at Level 3 were indicated by "\*\*\*" after chemical name; and unknown metabolites were labeled as "X - " followed by numbers.

**Table S3. Characteristics of the analysis sample (n=1,082)**

|                                                                         |                 |
|-------------------------------------------------------------------------|-----------------|
| Age, years                                                              | 51.0 (9.1)      |
| Women, n (%)                                                            | 589 (54.4%)     |
| Systolic blood pressure (SBP), mmHg                                     | 126.0 (17.4)    |
| Diastolic blood pressure (DBP), mmHg                                    | 80.7 (10.7)     |
| Hypertension (self-reported or SBP/DBP≥140/90 mmHg)                     | 299 (27.6%)     |
| Body mass index (BMI), kg/m <sup>2</sup>                                | 23.8 (3.2)      |
| Estimated glomerular filtration rate (eGFR)*, mL/min/1.73m <sup>2</sup> | 76.7 (14.4)     |
| Low-density lipoprotein cholesterol, mg/dL                              | 125.5 (34.2)    |
| Province, n (%)                                                         |                 |
| Guangxi                                                                 | 304 (28.1%)     |
| Guizhou                                                                 | 227 (21.0%)     |
| Henan                                                                   | 225 (20.8%)     |
| Hunan                                                                   | 326 (30.1%)     |
| Urbanization index <sup>†</sup>                                         | 68.7 (16.5)     |
| Per capita household income <sup>‡</sup> , 1000 yuan                    | 11.0 (17.0)     |
| Completed high school education, n (%)                                  | 308 (28.5%)     |
| Total energy <sup>§</sup> , kcal                                        | 2001.3 (645.7)  |
| Animal-source food consumption <sup>§</sup> , %kcal                     | 21.5 (19.2)     |
| Sodium consumption <sup>§</sup> , mg                                    | 3667.7 (2330.9) |
| Physical activity <sup>  </sup> , METS/week                             | 114.0 (196.3)   |
| Ever smoking, n (%)                                                     | 459 (42.4%)     |
| Drank alcohol last year, n (%)                                          | 321 (29.7%)     |
| Sample with gut microbiota data, n (%)                                  | 1,003 (92.7%)   |
| Sample with plasma metabolites data, n (%)                              | 434 (43.1%)     |
| Sample with both microbiota and metabolites data, n (%)                 | 355 (32.8%)     |

Mean (SD) or n (%) as noted. For income, physical activity, animal-source food consumption, and sodium consumption, median (interquartile range) are presented.

\* eGFR was calculated based on the Chronic Kidney Disease Epidemiology Collaboration (CKD-EPI) equation.

† Urbanization index encompasses 12 components of urbanization, including population density, sanitation, and health infrastructure.

‡ Per capita household income was estimated by dividing the total household income by the number of household members.

§ Dietary intakes were measured by 3-consecutive 24h dietary recalls and household food inventories.

|| Physical activity was estimated by 7-day physical activity (occupational, transportation, domestic, and leisure activities) recalls in METS.

**Table S4. Associations between gut microbial within-person diversity ( $\alpha$ -diversity) measures with systolic and diastolic blood pressure (SBP and DBP)**

|                   | SBP              |                                 |            |                                 |            | DBP                             |            |                                 |            |
|-------------------|------------------|---------------------------------|------------|---------------------------------|------------|---------------------------------|------------|---------------------------------|------------|
|                   | Mean<br>(SD)     | Model 1                         |            | Model 2                         |            | Model 1                         |            | Model 2                         |            |
|                   |                  | $\beta$ Coefficient<br>(95% CI) | P<br>value |
| Shannon<br>index* | 2.59<br>(0.30)   | 0.90<br>(-2.52, 4.33)           | 0.60       | 0.51<br>(-2.83, 3.86)           | 0.76       | -0.52<br>(-2.72, 1.68)          | 0.64       | -0.83<br>(-2.96, 1.31)          | 0.45       |
| Richness†         | 99.14<br>(27.51) | 0.01<br>(-0.03, 0.05)           | 0.59       | 0.01<br>(-0.03, 0.05)           | 0.64       | -4E-04<br>(-0.02, 0.02)         | 0.97       | -1E-03<br>(-0.02, 0.02)         | 0.91       |

n=1,003. Model 1 was adjusted for age, sex, provinces, urbanization index (tertiles:  $\leq 58.8$ , 58.8-78.8,  $>78.8$ ), per capita household income (tertiles:  $\leq 7.2$ , 7.2-18,  $>18$ ), education, total energy intake, animal-source food consumption, sodium consumption, physical activity (tertiles:  $\leq 75$ , 75-192,  $>192$ ), smoking, alcohol intake, and estimated glomerular filtration rate (eGFR). Model 2 was additionally adjusted for BMI.

\*Shannon index at genus level was calculated using  $-\sum p_i \ln p_i$ , where  $p_i$  is the proportional abundance of genera  $i$ .

†Richness measured the number of distinct genera per subject with rarefaction.

**Table S5. Association between gut microbial principal coordinates analysis (PCoA) axes with systolic and diastolic blood pressure (SBP and DBP, mmHg), Coefficient (95% CI)**

|                    | Taxa contributing to each axis  |                              | Eigen-value | Variance explained | SBP      |          | DBP      |          |
|--------------------|---------------------------------|------------------------------|-------------|--------------------|----------|----------|----------|----------|
|                    |                                 |                              |             |                    | Model 1  | Model 2  | Model 1  | Model 2  |
| MDS1               | <i>Prevotella</i>               | <i>Bacteroides</i>           | 4.91        | 8.61%              | 18.08    | 16.97    | 3.27     | 2.53     |
|                    | <i>Ralstonia</i>                | <i>Unassigned</i>            |             |                    | (-15.40, | (-15.70, | (-18.27, | (18.33,  |
|                    | <i>S24-7</i>                    | <i>Comamonadaceae</i>        |             |                    | 51.56)   | 49.64)   | 24.80)   | 23.40)   |
|                    | <i>Delftia</i>                  | <i>Rikenellaceae</i>         |             |                    |          |          |          |          |
|                    | <i>Parabacteroides</i>          | <i>RF39</i>                  |             |                    |          |          |          |          |
| MDS 2              | <i>Ralstonia</i>                | <i>Akkermansia</i>           | 3.18        | 5.58%              | 6.01     | 4.80     | -4.89    | -5.67    |
|                    | <i>Delftia</i>                  | <i>Comamonadaceae</i>        |             |                    | (-27.13, | (-27.57, | (-26.20, | (-26.34, |
|                    | <i>Bacteroides</i>              | <i>Prevotella</i>            |             |                    | 39.16)   | 37.18)   | 16.41)   | 14.99)   |
|                    | <i>Lachnospira</i>              | <i>Lactococcus</i>           |             |                    |          |          |          |          |
|                    | <i>Faecalibacterium</i>         | <i>Phascolarctobacterium</i> |             |                    |          |          |          |          |
| MDS3               | <i>Lactococcus</i>              | <i>YS2</i>                   | 2.02        | 3.54%              | 15.45    | 5.81     | 3.96     | -2.97    |
|                    | <i>Eggerthella</i>              | <i>Bifidobacterium</i>       |             |                    | (-30.06, | (-38.69, | (-25.31, | (-31.37, |
|                    | <i>Catenibacterium</i>          | <i>Peptococcus</i>           |             |                    | 60.97)   | 50.30)   | 33.22)   | 25.44)   |
|                    | <i>Leuconostocaceae</i>         | <i>Adlercreutzia</i>         |             |                    |          |          |          |          |
|                    | <i>Pseudoramibacter_</i>        | <i>Fusobacterium</i>         |             |                    |          |          |          |          |
| <i>Eubacterium</i> |                                 |                              |             |                    |          |          |          |          |
| MDS4               | <i>Adlercreutzia</i>            | <i>Rothia</i>                | 1.80        | 3.16%              | 52.94    | 38.90    | 16.60    | 6.47     |
|                    | <i>Enterobacteriaceae_other</i> | <i>Fusobacterium</i>         |             |                    | (15.61,  | (2.19,   | (-7.47,  | (-17.01, |
|                    | <i>Leuconostocaceae</i>         | <i>Coprococcus</i>           |             |                    | 90.27)** | 75.61) * | 40.67)   | 29.95)   |
|                    | <i>Serratia</i>                 | <i>Eggerthella</i>           |             |                    |          |          |          |          |
|                    | <i>Enterobacteriaceae</i>       | <i>Ralstonia</i>             |             |                    |          |          |          |          |

MDS, multidimensional scaling. PCo were derived from PCoA of 1,008 taxa based on Bray-Curtis distance matrix in microbiota analysis sample (n=1,003). Coefficient indicates SBP and DBP (mmHg) associated with each 1 unit increase in microbiota pattern score. Contributing taxa include taxa with the top 10 highest absolute scores for the respective PCo. Taxa are vertically ordered by their absolute values of scores (descending). A full list of scores is shown in Table S1. Model 1 was adjusted for age, sex, provinces, urbanization index (tertiles: ≤58.8, 58.8-78.8, >78.8), per capita household income (tertiles: ≤7.2, 7.2-18, >18), education, total energy intake, animal-source food consumption, sodium consumption, physical activity (tertiles: ≤75, 75-192, >192), smoking, alcohol intake, and estimated glomerular filtration rate (eGFR). Model 2 was additionally adjusted for BMI. “\*” indicates p-value < 0.05; “\*\*” indicates p-value<0.01.

Table S6. Association between specific taxa with systolic and diastolic blood pressure (SBP and DBP)

| Kingdom  | Phylum          | Class                | Order              | Family                     | Genus                     | SBP           |       |        |         |         |         |        |         |         |       | DBP     |         |         |         |        |         |         |        |        |       |      |      |     |
|----------|-----------------|----------------------|--------------------|----------------------------|---------------------------|---------------|-------|--------|---------|---------|---------|--------|---------|---------|-------|---------|---------|---------|---------|--------|---------|---------|--------|--------|-------|------|------|-----|
|          |                 |                      |                    |                            |                           | Model 1       |       |        |         |         | Model 2 |        |         |         |       | Model 1 |         |         | Model 2 |        |         |         |        |        |       |      |      |     |
|          |                 |                      |                    |                            |                           | Mean(SD) or % | Coef. | 95% CI | p-value | q-value | Coef.   | 95% CI | p-value | q-value | Coef. | 95% CI  | p-value | q-value | Coef.   | 95% CI | p-value | q-value | Rare   |        |       |      |      |     |
| Archaea  | [Parvarchaeota] | [Parvarchaeae]       | WCHD3-30           |                            |                           | 0.10%         | -     | -9.22  | -41.24  | 22.79   | 0.57    | 1.00   | -10.06  | -41.30  | 21.18 | 0.53    | 1.00    | -3.10   | -23.69  | 17.48  | 0.77    | 0.96    | -3.70  | -23.64 | 16.24 | 0.72 | 0.97 | Yes |
| Archaea  | Crenarchaeota   | Thaumarchaeota       | Cenarchaeales      | Cenarchaeaceae             | Nitrosopumilus            | 0.20%         | -     | 18.26  | -4.43   | 40.94   | 0.11    | 1.00   | 14.61   | -7.55   | 36.77 | 0.20    | 1.00    | 13.52   | -1.06   | 28.09  | 0.07    | 0.95    | 10.93  | -3.22  | 25.07 | 0.13 | 0.96 | Yes |
| Archaea  | Crenarchaeota   | Thaumarchaeota       | Nitrososphaerales  | Nitrososphaeraceae         | Candidatus Nitrososphaera | 0.60%         | -     | 1.25   | -11.82  | 14.32   | 0.85    | 1.00   | 1.32    | -11.43  | 14.07 | 0.84    | 1.00    | -2.00   | -10.40  | 6.40   | 0.64    | 0.95    | -1.93  | -10.07 | 6.20  | 0.64 | 0.96 | Yes |
| Archaea  | Euryarchaeota   | Halobacteria         | Halobacteriales    | Halobacteriaceae           | Halococcus                | 0.20%         | -     | -15.51 | -38.20  | 7.18    | 0.18    | 1.00   | -10.77  | -32.96  | 11.41 | 0.34    | 1.00    | -6.48   | -21.08  | 8.11   | 0.38    | 0.95    | -3.07  | -17.24 | 11.10 | 0.67 | 0.96 | Yes |
| Archaea  | Euryarchaeota   | Methanobacteria      | Methanobacteriales | Methanobacteriaceae        | Methanobrevibacter        | 0.32          | 0.55  | -0.41  | -2.26   | 1.45    | 0.67    | 1.00   | -0.18   | -1.99   | 1.63  | 0.85    | 1.00    | 0.16    | -1.03   | 1.35   | 0.79    | 0.96    | 0.34   | -0.82  | 1.49  | 0.56 | 0.96 | No  |
| Archaea  | Euryarchaeota   | Methanobacteria      | Methanobacteriales | Methanobacteriaceae        | Methanosphaera            | 0.22          | 0.47  | 0.03   | -2.19   | 2.26    | 0.98    | 1.00   | 0.36    | -1.81   | 2.54  | 0.74    | 1.00    | 0.25    | -1.18   | 1.68   | 0.73    | 0.96    | 0.49   | -0.89  | 1.88  | 0.48 | 0.96 | No  |
| Archaea  | Euryarchaeota   | Thermoplasmata       | E2                 | [Methanomassiliicoccaceae] | vadinCA11                 | 0.20%         | -     | 15.89  | -6.71   | 38.49   | 0.17    | 1.00   | 17.17   | -4.88   | 39.22 | 0.13    | 1.00    | 8.80    | -5.73   | 23.34  | 0.23    | 0.95    | 9.74   | -4.34  | 23.82 | 0.17 | 0.96 | Yes |
| Bacteria | [Caldithrix]    | KSB1                 | Ucn15732           |                            |                           | 1.00%         | -     | 2.93   | -7.21   | 13.08   | 0.57    | 1.00   | 2.52    | -7.38   | 12.42 | 0.62    | 1.00    | 0.48    | -6.05   | 7.00   | 0.89    | 0.97    | 0.19   | -6.13  | 6.52  | 0.95 | 0.99 | Yes |
| Bacteria | [Thermi]        | Deinococci           | Deinococcales      | Deinococcaceae             | Deinococcus               | 2.19%         | -     | 3.76   | -3.17   | 10.70   | 0.29    | 1.00   | 3.22    | -3.55   | 9.99  | 0.35    | 1.00    | 1.67    | -2.79   | 6.13   | 0.46    | 0.95    | 1.28   | -3.05  | 5.60  | 0.56 | 0.96 | Yes |
| Bacteria | [Thermi]        | Deinococci           | Deinococcales      | Trueperaceae               | B-42                      | 1.40%         | -     | -4.57  | -13.24  | 4.10    | 0.30    | 1.00   | -5.79   | -14.25  | 2.67  | 0.18    | 1.00    | -3.04   | -8.62   | 2.53   | 0.28    | 0.95    | -3.90  | -9.30  | 1.50  | 0.16 | 0.96 | Yes |
| Bacteria | [Thermi]        | Deinococci           | Deinococcales      | Trueperaceae               | Truepera                  | 0.30%         | -     | 0.94   | -17.55  | 19.44   | 0.92    | 1.00   | 0.96    | -17.09  | 19.00 | 0.92    | 1.00    | 3.38    | -8.51   | 15.26  | 0.58    | 0.95    | 3.41   | -8.11  | 14.92 | 0.56 | 0.96 | Yes |
| Bacteria | [Thermi]        | Deinococci           | Thermales          | Thermaceae                 | Meiothermus               | 0.10%         | -     | -1.66  | -33.69  | 30.37   | 0.92    | 1.00   | 1.69    | -29.58  | 32.95 | 0.92    | 1.00    | 3.95    | -16.64  | 24.54  | 0.71    | 0.95    | 6.31   | -13.64 | 26.27 | 0.53 | 0.96 | Yes |
| Bacteria | [Thermi]        | Deinococci           | Thermales          | Thermaceae                 | Thermus                   | 1.99%         | -     | 4.38   | -2.80   | 11.56   | 0.23    | 1.00   | 3.78    | -3.23   | 10.79 | 0.29    | 1.00    | 1.61    | -3.01   | 6.22   | 0.50    | 0.95    | 1.19   | -3.28  | 5.67  | 0.60 | 0.96 | Yes |
| Bacteria | Acidobacteria   | [Chloracidobacteria] | PK29               |                            |                           | 0.60%         | -     | -6.72  | -19.89  | 6.45    | 0.32    | 1.00   | -5.85   | -18.70  | 7.01  | 0.37    | 1.00    | -2.51   | -10.98  | 5.95   | 0.56    | 0.95    | -1.85  | -10.06 | 6.36  | 0.66 | 0.96 | Yes |
| Bacteria | Acidobacteria   | [Chloracidobacteria] | RB41               | Ellin6075                  |                           | 3.49%         | -     | -0.18  | -5.76   | 5.40    | 0.95    | 1.00   | -0.30   | -5.74   | 5.15  | 0.91    | 1.00    | -1.44   | -5.03   | 2.14   | 0.43    | 0.95    | -1.51  | -4.98  | 1.97  | 0.40 | 0.96 | Yes |
| Bacteria | Acidobacteria   | [Chloracidobacteria] | RB41               |                            |                           | 1.99%         | -     | -2.42  | -9.70   | 4.86    | 0.51    | 1.00   | -3.17   | -10.28  | 3.94  | 0.38    | 1.00    | -6.02   | -10.69  | -1.35  | 0.01    | 0.95    | -6.55  | -11.07 | -2.03 | 0.00 | 0.92 | Yes |
| Bacteria | Acidobacteria   | [Chloracidobacteria] |                    |                            |                           | 0.20%         | -     | 8.23   | -14.48  | 30.94   | 0.48    | 1.00   | 4.04    | -18.15  | 26.24 | 0.72    | 1.00    | 5.04    | -9.56   | 19.64  | 0.50    | 0.95    | 2.06   | -12.10 | 16.23 | 0.77 | 0.97 | Yes |
| Bacteria | Acidobacteria   | Acidobacteria-5      |                    |                            |                           | 1.00%         | -     | 1.43   | -8.71   | 11.57   | 0.78    | 1.00   | 0.22    | -9.67   | 10.12 | 0.96    | 1.00    | -0.80   | -7.32   | 5.72   | 0.81    | 0.96    | -1.66  | -7.97  | 4.66  | 0.61 | 0.96 | Yes |
| Bacteria | Acidobacteria   | Acidobacteria-6      | CCU21              |                            |                           | 0.30%         | -     | -0.76  | -19.27  | 17.75   | 0.94    | 1.00   | -4.79   | -22.88  | 13.30 | 0.60    | 1.00    | -2.71   | -14.60  | 9.19   | 0.66    | 0.95    | -5.57  | -17.11 | 5.97  | 0.34 | 0.96 | Yes |
| Bacteria | Acidobacteria   | Acidobacteria-6      | iii1-15            | mb2424                     |                           | 1.20%         | -     | -1.18  | -10.60  | 8.24    | 0.81    | 1.00   | -1.20   | -10.39  | 8.00  | 0.80    | 1.00    | -0.08   | -6.14   | 5.98   | 0.98    | 0.99    | -0.06  | -5.93  | 5.81  | 0.98 | 1.00 | Yes |
| Bacteria | Acidobacteria   | Acidobacteria-6      | iii1-15            | RB40                       |                           | 0.70%         | -     | 9.74   | -2.40   | 21.87   | 0.12    | 1.00   | 10.23   | -1.61   | 22.07 | 0.09    | 1.00    | 5.14    | -2.66   | 12.95  | 0.20    | 0.95    | 5.50   | -2.06  | 13.06 | 0.15 | 0.96 | Yes |
| Bacteria | Acidobacteria   | Acidobacteria-6      | iii1-15            |                            |                           | 4.69%         | -     | 1.67   | -3.19   | 6.53    | 0.50    | 1.00   | 1.49    | -3.25   | 6.23  | 0.54    | 1.00    | 0.41    | -2.72   | 3.53   | 0.80    | 0.96    | 0.30   | -2.73  | 3.33  | 0.85 | 0.98 | Yes |
| Bacteria | Acidobacteria   | Acidobacteriia       | Acidobacteriales   | Acidobacteriaceae          | Edaphobacter              | 0.20%         | -     | 3.92   | -18.74  | 26.58   | 0.73    | 1.00   | 2.26    | -19.85  | 24.37 | 0.84    | 1.00    | -9.65   | -24.20  | 4.91   | 0.19    | 0.95    | -10.84 | -24.94 | 3.25  | 0.13 | 0.96 | Yes |
| Bacteria | Acidobacteria   | Acidobacteriia       | Acidobacteriales   | Acidobacteriaceae          | Terriglobus               | 0.60%         | -     | 16.15  | 2.97    | 29.34   | 0.02    | 0.99   | 13.76   | 0.87    | 26.65 | 0.04    | 1.00    | 7.72    | -0.77   | 16.21  | 0.07    | 0.95    | 6.03   | -2.21  | 14.27 | 0.15 | 0.96 | Yes |
| Bacteria | Acidobacteria   | Acidobacteriia       | Acidobacteriales   | Acidobacteriaceae          |                           | 0.80%         | -     | 6.64   | -4.70   | 17.98   | 0.25    | 1.00   | 4.73    | -6.35   | 15.81 | 0.40    | 1.00    | 4.11    | -3.18   | 11.40  | 0.27    | 0.95    | 2.76   | -4.31  | 9.84  | 0.44 | 0.96 | Yes |
| Bacteria | Acidobacteria   | Acidobacteriia       | Acidobacteriales   | Koribacteraceae            | Candidatus Koribacter     | 2.09%         | -     | 3.95   | -3.14   | 11.04   | 0.27    | 1.00   | 3.23    | -3.68   | 10.15 | 0.36    | 1.00    | 1.00    | -3.56   | 5.56   | 0.67    | 0.95    | 0.50   | -3.92  | 4.92  | 0.82 | 0.97 | Yes |
| Bacteria | Acidobacteria   | Acidobacteriia       | Acidobacteriales   | Koribacteraceae            |                           | 2.79%         | -     | 5.08   | -1.05   | 11.22   | 0.10    | 1.00   | 4.29    | -1.82   | 10.39 | 0.17    | 1.00    | 1.89    | -2.06   | 5.84   | 0.35    | 0.95    | 0.96   | -2.94  | 4.86  | 0.63 | 0.96 | Yes |
| Bacteria | Acidobacteria   | DA052                | Ellin6513          |                            |                           | 1.99%         | -     | 1.35   | -5.90   | 8.60    | 0.71    | 1.00   | 1.71    | -5.36   | 8.79  | 0.63    | 1.00    | -0.17   | -4.83   | 4.49   | 0.94    | 0.98    | 0.10   | -4.41  | 4.62  | 0.96 | 0.99 | Yes |
| Bacteria | Acidobacteria   | Holophagae           | Holophagales       |                            |                           | 0.30%         | -     | 6.65   | -11.88  | 25.18   | 0.48    | 1.00   | 4.39    | -13.70  | 22.49 | 0.63    | 1.00    | 9.25    | -2.65   | 21.16  | 0.13    | 0.95    | 7.70   | -3.84  | 19.24 | 0.19 | 0.96 | Yes |
| Bacteria | Acidobacteria   | iii1-8               | 32-20              |                            |                           | 0.70%         | -     | -3.21  | -15.42  | 8.99    | 0.61    | 1.00   | -3.20   | -15.11  | 8.71  | 0.60    | 1.00    | -6.04   | -13.88  | 1.80   | 0.13    | 0.95    | -6.03  | -13.62 | 1.57  | 0.12 | 0.96 | Yes |
| Bacteria | Acidobacteria   | iii1-8               | DS-18              |                            |                           | 1.60%         | -     | -4.42  | -12.56  | 3.72    | 0.29    | 1.00   | -4.89   | -12.84  | 3.05  | 0.23    | 1.00    | -3.61   | -8.85   | 1.62   | 0.18    | 0.95    | -3.94  | -9.01  | 1.13  | 0.13 | 0.96 | Yes |
| Bacteria | Acidobacteria   | PAUC37f              |                    |                            |                           | 0.20%         | -     | 6.26   | -16.37  | 28.90   | 0.59    | 1.00   | 0.05    | -22.10  | 22.21 | 1.00    | 1.00    | 6.29    | -8.25   | 20.84  | 0.40    | 0.95    | 1.87   | -12.27 | 16.01 | 0.80 | 0.97 | Yes |
| Bacteria | Acidobacteria   | RB25                 |                    |                            |                           | 0.10%         | -     | -17.87 | -49.79  | 14.04   | 0.27    | 1.00   | -19.23  | -50.36  | 11.91 | 0.23    | 1.00    | -17.33  | -37.83  | 3.17   | 0.10    | 0.95    | -18.32 | -38.17 | 1.54  | 0.07 | 0.96 | Yes |
| Bacteria | Acidobacteria   | Solibacteres         | JH-WHS99           |                            |                           | 0.10%         | -     | -0.97  | -32.91  | 30.98   | 0.95    | 1.00   | -1.79   | -32.96  | 29.38 | 0.91    | 1.00    | 11.77   | -8.75   | 32.30  | 0.26    | 0.95    | 11.21  | -8.67  | 31.09 | 0.27 | 0.96 | Yes |
| Bacteria | Acidobacteria   | Solibacteres         | Solibacterales     | PAUC26f                    |                           | 0.20%         | -     | -1.94  | -24.59  | 20.71   | 0.87    | 1.00   | -3.60   | -25.70  | 18.51 | 0.75    | 1.00    | 1.51    | -13.05  | 16.07  | 0.84    | 0.96    | 0.31   | -13.80 | 14.42 | 0.97 | 0.99 | Yes |
| Bacteria | Acidobacteria   | Solibacteres         | Solibacterales     | Solibacteraceae            | Candidatus Solibacter     | 0.80%         | -     | -6.81  | -18.27  | 4.66    | 0.24    | 1.00   | -6.69   | -17.88  | 4.49  | 0.24    | 1.00    | -8.05   | -15.41  | -0.69  | 0.03    | 0.95    | -7.96  | -15.09 | -0.83 | 0.03 | 0.96 | Yes |
| Bacteria | Acidobacteria   | Solibacteres         | Solibacterales     | Solibacteraceae            |                           | 0.30%         | -     | 1.42   | -17.12  | 19.96   | 0.88    | 1.00   | 0.67    | -17.42  | 18.76 | 0.94    | 1.00    | 3.22    | -8.70   | 15.14  | 0.60    | 0.95    | 2.72   | -8.82  | 14.27 | 0.64 | 0.96 | Yes |
| Bacteria | Acidobacteria   | Solibacteres         | Solibacterales     |                            |                           | 2.19%         | -     | 0.26   | -6.69   | 7.20    | 0.94    | 1.00   | -0.25   | -7.03   | 6.53  | 0.94    | 1.00    | 0.08    | -4.39   | 4.55   | 0.97    | 0.99    | -0.27  | -4.60  | 4.06  | 0.90 | 0.99 | Yes |
| Bacteria | Acidobacteria   | Sva0725              | Sva0725            |                            |                           | 0.60%         | -     | -0.82  | -14.00  | 12.36   | 0.90    | 1.00   | -1.70   | -14.57  | 11.16 | 0.79    | 1.00    | -2.34   | -10.81  | 6.13   | 0.59    | 0.95    | -2.94  | -11.14 | 5.27  | 0.48 | 0.96 | Yes |
| Bacteria | Acidobacteria   |                      |                    |                            |                           | 0.30%         | -     | -7.41  | -26.05  | 11.23   | 0.44    | 1.00   | -8.98   | -27.18  | 9.21  | 0.33    | 1.00    | -1.75   | -13.74  | 10.23  | 0.77    | 0.96    | -2.89  | -14.50 | 8.73  | 0.63 | 0.96 | Yes |
| Bacteria | Actinobacteria  | Acidimicrobiia       | Acidimicrobiales   | AKIW874                    |                           | 0.30%         | -     | -10.05 | -28.59  | 8.49    | 0.29    | 1.00   | -12.31  | -30.41  | 5.78  | 0.18    | 1.00    | -3.17   | -15.09  | 8.76   | 0.60    | 0.95    | -4.75  | -16.31 | 6.81  | 0.42 | 0.96 | Yes |
| Bacteria | Actinobacteria  | Acidimicrobiia       | Acidimicrobiales   | C111                       |                           | 2.09%         | -     | -2.89  | -10.03  | 4.25    | 0.43    | 1.00   | -3.33   | -10.29  | 3.64  | 0.35    | 1.00    | -1.44   | -6.03   |        |         |         |        |        |       |      |      |     |



|          |                |                |                 |                     |                      |        |      |        |        |       |      |      |        |        |       |      |      |        |        |       |      |      |       |        |       |      |      |     |
|----------|----------------|----------------|-----------------|---------------------|----------------------|--------|------|--------|--------|-------|------|------|--------|--------|-------|------|------|--------|--------|-------|------|------|-------|--------|-------|------|------|-----|
| Bacteria | Actinobacteria | Actinobacteria | Actinomycetales | Cellulomonadaceae   | Other                | 0.40%  | -    | 0.84   | -15.24 | 16.92 | 0.92 | 1.00 | 0.56   | -15.13 | 16.25 | 0.94 | 1.00 | 0.46   | -9.88  | 10.80 | 0.93 | 0.98 | 0.28  | -9.73  | 10.30 | 0.96 | 0.99 | Yes |
| Bacteria | Actinobacteria | Actinobacteria | Actinomycetales | Corynebacteriaceae  | Corynebacterium      | 0.51   | 0.33 | 0.98   | -2.09  | 4.05  | 0.53 | 1.00 | 1.22   | -1.78  | 4.22  | 0.42 | 1.00 | 0.28   | -1.70  | 2.25  | 0.78 | 0.96 | 0.43  | -1.48  | 2.35  | 0.66 | 0.96 | No  |
| Bacteria | Actinobacteria | Actinobacteria | Actinomycetales | Dermabacteraceae    | Brachybacterium      | 11.17% | -    | -0.09  | -3.33  | 3.15  | 0.96 | 1.00 | -0.08  | -3.24  | 3.08  | 0.96 | 1.00 | 0.60   | -1.48  | 2.68  | 0.57 | 0.95 | 0.62  | -1.40  | 2.63  | 0.55 | 0.96 | Yes |
| Bacteria | Actinobacteria | Actinobacteria | Actinomycetales | Dermabacteraceae    | Other                | 0.10%  | -    | -4.95  | -36.97 | 27.08 | 0.76 | 1.00 | -10.41 | -41.68 | 20.87 | 0.51 | 1.00 | 11.80  | -8.78  | 32.37 | 0.26 | 0.95 | 7.94  | -12.03 | 27.90 | 0.44 | 0.96 | Yes |
| Bacteria | Actinobacteria | Actinobacteria | Actinomycetales | Dermabacteraceae    | Actinomycetales      | 3.59%  | -    | -1.68  | -7.15  | 3.80  | 0.55 | 1.00 | -1.61  | -6.95  | 3.72  | 0.55 | 1.00 | -2.70  | -6.21  | 0.82  | 0.13 | 0.95 | -2.65 | -6.05  | 0.76  | 0.13 | 0.96 | Yes |
| Bacteria | Actinobacteria | Actinobacteria | Actinomycetales | Dermacoccaceae      | Dermacoccus          | 4.09%  | -    | -0.15  | -5.26  | 4.97  | 0.96 | 1.00 | -1.50  | -6.51  | 3.50  | 0.56 | 1.00 | -1.33  | -4.61  | 1.96  | 0.43 | 0.95 | -2.30 | -5.49  | 0.90  | 0.16 | 0.96 | Yes |
| Bacteria | Actinobacteria | Actinobacteria | Actinomycetales | Dermatophilaceae    | Dermatophilus        | 11.76% | -    | -1.09  | -4.27  | 2.09  | 0.50 | 1.00 | -0.97  | -4.08  | 2.13  | 0.54 | 1.00 | -0.63  | -2.68  | 1.42  | 0.55 | 0.95 | -0.54 | -2.53  | 1.44  | 0.59 | 0.96 | Yes |
| Bacteria | Actinobacteria | Actinobacteria | Actinomycetales | Dermatophilaceae    | Other                | 1.69%  | -    | -2.40  | -10.29 | 5.49  | 0.55 | 1.00 | -2.27  | -9.97  | 5.42  | 0.56 | 1.00 | -1.10  | -6.17  | 3.97  | 0.67 | 0.95 | -1.00 | -5.91  | 3.91  | 0.69 | 0.96 | Yes |
| Bacteria | Actinobacteria | Actinobacteria | Actinomycetales | Dietziaceae         | Other                | 0.20%  | -    | 5.61   | -17.30 | 28.52 | 0.63 | 1.00 | 6.52   | -15.83 | 28.87 | 0.57 | 1.00 | 6.53   | -8.19  | 21.26 | 0.38 | 0.95 | 7.22  | -7.04  | 21.49 | 0.32 | 0.96 | Yes |
| Bacteria | Actinobacteria | Actinobacteria | Actinomycetales | Frankiaceae         | Other                | 0.20%  | -    | 4.29   | -18.35 | 26.93 | 0.71 | 1.00 | 5.27   | -16.82 | 27.36 | 0.64 | 1.00 | 6.98   | -7.56  | 21.53 | 0.35 | 0.95 | 7.72  | -6.37  | 21.82 | 0.28 | 0.96 | Yes |
| Bacteria | Actinobacteria | Actinobacteria | Actinomycetales | Frankiaceae         | Actinomycetales      | 0.90%  | -    | 2.83   | -7.93  | 13.59 | 0.61 | 1.00 | 3.57   | -6.93  | 14.07 | 0.51 | 1.00 | 5.95   | -0.96  | 12.85 | 0.09 | 0.95 | 6.48  | -0.21  | 13.17 | 0.06 | 0.96 | Yes |
| Bacteria | Actinobacteria | Actinobacteria | Actinomycetales | Geodermatophilaceae | Geodermatophilus     | 0.70%  | -    | -5.37  | -17.53 | 6.80  | 0.39 | 1.00 | -6.34  | -18.21 | 5.54  | 0.30 | 1.00 | 0.21   | -7.61  | 8.04  | 0.96 | 0.98 | -0.46 | -8.04  | 7.13  | 0.91 | 0.99 | Yes |
| Bacteria | Actinobacteria | Actinobacteria | Actinomycetales | Geodermatophilaceae | Modestobacter        | 1.99%  | -    | -1.25  | -8.51  | 6.02  | 0.74 | 1.00 | -1.94  | -9.03  | 5.15  | 0.59 | 1.00 | -2.71  | -7.38  | 1.95  | 0.25 | 0.95 | -3.19 | -7.71  | 1.34  | 0.17 | 0.96 | Yes |
| Bacteria | Actinobacteria | Actinobacteria | Actinomycetales | Geodermatophilaceae | Other                | 1.30%  | -    | -0.24  | -9.23  | 8.74  | 0.96 | 1.00 | -0.90  | -9.67  | 7.86  | 0.84 | 1.00 | -5.09  | -10.86 | 0.67  | 0.08 | 0.95 | -5.55 | -11.13 | 0.04  | 0.05 | 0.96 | Yes |
| Bacteria | Actinobacteria | Actinobacteria | Actinomycetales | Geodermatophilaceae | Actinomycetales      | 0.40%  | -    | 11.23  | -4.83  | 27.29 | 0.17 | 1.00 | 13.57  | -2.10  | 29.25 | 0.09 | 1.00 | 8.87   | -1.45  | 19.19 | 0.09 | 0.95 | 10.57 | 0.57   | 20.57 | 0.04 | 0.96 | Yes |
| Bacteria | Actinobacteria | Actinobacteria | Actinomycetales | Gordoniaceae        | Gordonia             | 1.69%  | -    | -3.10  | -10.90 | 4.69  | 0.44 | 1.00 | -3.48  | -11.08 | 4.13  | 0.37 | 1.00 | -2.38  | -7.39  | 2.63  | 0.35 | 0.95 | -2.63 | -7.49  | 2.22  | 0.29 | 0.96 | Yes |
| Bacteria | Actinobacteria | Actinobacteria | Actinomycetales | Intrasporangiaceae  | Arsenicococcus       | 0.10%  | -    | 26.35  | -5.52  | 58.23 | 0.11 | 1.00 | 29.08  | -2.02  | 60.18 | 0.07 | 1.00 | 14.27  | -6.23  | 34.77 | 0.17 | 0.95 | 16.21 | -3.65  | 36.07 | 0.11 | 0.96 | Yes |
| Bacteria | Actinobacteria | Actinobacteria | Actinomycetales | Intrasporangiaceae  | Kytococcus           | 0.10%  | -    | -4.39  | -36.41 | 27.64 | 0.79 | 1.00 | -4.57  | -35.82 | 26.67 | 0.77 | 1.00 | 1.87   | -18.72 | 22.45 | 0.86 | 0.96 | 1.75  | -18.19 | 21.70 | 0.86 | 0.98 | Yes |
| Bacteria | Actinobacteria | Actinobacteria | Actinomycetales | Intrasporangiaceae  | Other                | 8.67%  | -    | 0.06   | -3.54  | 3.65  | 0.98 | 1.00 | 0.31   | -3.20  | 3.82  | 0.86 | 1.00 | -0.24  | -2.56  | 2.07  | 0.84 | 0.96 | -0.06 | -2.30  | 2.18  | 0.96 | 0.99 | Yes |
| Bacteria | Actinobacteria | Actinobacteria | Actinomycetales | Intrasporangiaceae  | Phycococcus          | 1.99%  | -    | -1.63  | -8.88  | 5.61  | 0.66 | 1.00 | -1.79  | -8.85  | 5.28  | 0.62 | 1.00 | -0.42  | -5.07  | 4.24  | 0.86 | 0.96 | -0.52 | -5.03  | 3.99  | 0.82 | 0.97 | Yes |
| Bacteria | Actinobacteria | Actinobacteria | Actinomycetales | Intrasporangiaceae  | Terracoccus          | 0.10%  | -    | -9.09  | -41.11 | 22.94 | 0.58 | 1.00 | -10.63 | -41.88 | 20.62 | 0.50 | 1.00 | -4.69  | -25.28 | 15.90 | 0.65 | 0.95 | -5.79 | -25.74 | 14.16 | 0.57 | 0.96 | Yes |
| Bacteria | Actinobacteria | Actinobacteria | Actinomycetales | Intrasporangiaceae  | Actinomycetales      | 8.18%  | -    | -2.28  | -6.00  | 1.44  | 0.23 | 1.00 | -2.37  | -6.00  | 1.25  | 0.20 | 1.00 | -1.17  | -3.56  | 1.22  | 0.34 | 0.95 | -1.23 | -3.55  | 1.09  | 0.30 | 0.96 | Yes |
| Bacteria | Actinobacteria | Actinobacteria | Actinomycetales | Jonesiaceae         | Other                | 0.10%  | -    | 26.29  | -5.71  | 58.30 | 0.11 | 1.00 | 29.09  | -2.14  | 60.31 | 0.07 | 1.00 | 8.81   | -11.79 | 29.41 | 0.40 | 0.95 | 10.81 | -9.15  | 30.76 | 0.29 | 0.96 | Yes |
| Bacteria | Actinobacteria | Actinobacteria | Actinomycetales | Kineosporiaceae     | Kineosporia          | 0.20%  | -    | -1.46  | -24.25 | 21.33 | 0.90 | 1.00 | 0.05   | -22.19 | 22.29 | 1.00 | 1.00 | -1.42  | -16.07 | 13.23 | 0.85 | 0.96 | -0.33 | -14.53 | 13.87 | 0.96 | 0.99 | Yes |
| Bacteria | Actinobacteria | Actinobacteria | Actinomycetales | Kineosporiaceae     | Other                | 0.80%  | -    | 7.49   | -3.89  | 18.87 | 0.20 | 1.00 | 6.49   | -4.63  | 17.60 | 0.25 | 1.00 | 5.28   | -2.04  | 12.60 | 0.16 | 0.95 | 4.58  | -2.52  | 11.67 | 0.21 | 0.96 | Yes |
| Bacteria | Actinobacteria | Actinobacteria | Actinomycetales | Kineosporiaceae     | Actinomycetales      | 1.40%  | -    | 1.88   | -6.89  | 10.65 | 0.67 | 1.00 | 2.37   | -6.18  | 10.93 | 0.59 | 1.00 | -0.63  | -6.27  | 5.01  | 0.83 | 0.96 | -0.26 | -5.72  | 5.20  | 0.93 | 0.99 | Yes |
| Bacteria | Actinobacteria | Actinobacteria | Actinomycetales | Microbacteriaceae   | Agrococcus           | 1.00%  | -    | -5.74  | -15.91 | 4.43  | 0.27 | 1.00 | -5.00  | -14.93 | 4.93  | 0.32 | 1.00 | -2.43  | -8.97  | 4.12  | 0.47 | 0.95 | -1.90 | -8.24  | 4.44  | 0.56 | 0.96 | Yes |
| Bacteria | Actinobacteria | Actinobacteria | Actinomycetales | Microbacteriaceae   | Agromyces            | 1.89%  | -    | -2.38  | -9.87  | 5.11  | 0.53 | 1.00 | -2.15  | -9.46  | 5.16  | 0.56 | 1.00 | -0.40  | -5.22  | 4.42  | 0.87 | 0.96 | -0.22 | -4.88  | 4.45  | 0.93 | 0.99 | Yes |
| Bacteria | Actinobacteria | Actinobacteria | Actinomycetales | Microbacteriaceae   | Candidatus Aquiluna  | 0.40%  | -    | -5.13  | -21.10 | 10.85 | 0.53 | 1.00 | -5.09  | -20.68 | 10.49 | 0.52 | 1.00 | 3.39   | -6.87  | 13.66 | 0.52 | 0.95 | 3.44  | -6.51  | 13.38 | 0.50 | 0.96 | Yes |
| Bacteria | Actinobacteria | Actinobacteria | Actinomycetales | Microbacteriaceae   | Candidatus Rhodoluna | 0.60%  | -    | -7.92  | -20.99 | 5.16  | 0.23 | 1.00 | -5.97  | -18.74 | 6.80  | 0.36 | 1.00 | 0.81   | -7.60  | 9.22  | 0.85 | 0.96 | 2.22  | -5.94  | 10.37 | 0.59 | 0.96 | Yes |
| Bacteria | Actinobacteria | Actinobacteria | Actinomycetales | Microbacteriaceae   | Cryocolla            | 7.68%  | -    | -1.68  | -5.51  | 2.15  | 0.39 | 1.00 | -1.38  | -5.12  | 2.36  | 0.47 | 1.00 | -0.67  | -3.14  | 1.79  | 0.59 | 0.95 | -0.45 | -2.83  | 1.94  | 0.71 | 0.97 | Yes |
| Bacteria | Actinobacteria | Actinobacteria | Actinomycetales | Microbacteriaceae   | Curtobacterium       | 4.79%  | -    | -2.66  | -7.42  | 2.09  | 0.27 | 1.00 | -3.02  | -7.66  | 1.62  | 0.20 | 1.00 | -3.00  | -6.06  | 0.05  | 0.05 | 0.95 | -3.25 | -6.21  | -0.30 | 0.03 | 0.96 | Yes |
| Bacteria | Actinobacteria | Actinobacteria | Actinomycetales | Microbacteriaceae   | Frigoribacterium     | 0.20%  | -    | -12.88 | -35.62 | 9.87  | 0.27 | 1.00 | -12.51 | -34.70 | 9.68  | 0.27 | 1.00 | -10.04 | -24.66 | 4.57  | 0.18 | 0.95 | -9.76 | -23.92 | 4.40  | 0.18 | 0.96 | Yes |
| Bacteria | Actinobacteria | Actinobacteria | Actinomycetales | Microbacteriaceae   | Leucobacter          | 12.36% | -    | -0.04  | -3.16  | 3.08  | 0.98 | 1.00 | -0.07  | -3.12  | 2.97  | 0.96 | 1.00 | -0.43  | -2.44  | 1.57  | 0.67 | 0.95 | -0.45 | -2.40  | 1.49  | 0.65 | 0.96 | Yes |
| Bacteria | Actinobacteria | Actinobacteria | Actinomycetales | Microbacteriaceae   | Microbacterium       | 10.67% | -    | 1.55   | -1.72  | 4.82  | 0.35 | 1.00 | 0.77   | -2.43  | 3.97  | 0.64 | 1.00 | -0.08  | -2.18  | 2.03  | 0.94 | 0.98 | -0.63 | -2.67  | 1.41  | 0.54 | 0.96 | Yes |
| Bacteria | Actinobacteria | Actinobacteria | Actinomycetales | Microbacteriaceae   | Other                | 4.79%  | -    | -0.37  | -5.09  | 4.36  | 0.88 | 1.00 | -0.84  | -5.45  | 3.77  | 0.72 | 1.00 | 1.08   | -1.96  | 4.12  | 0.49 | 0.95 | 0.75  | -2.19  | 3.70  | 0.62 | 0.96 | Yes |
| Bacteria | Actinobacteria | Actinobacteria | Actinomycetales | Microbacteriaceae   | Pseudoclavibacter    | 1.69%  | -    | -1.19  | -9.11  | 6.72  | 0.77 | 1.00 | -1.27  | -8.99  | 6.46  | 0.75 | 1.00 | -0.75  | -5.84  | 4.34  | 0.77 | 0.96 | -0.81 | -5.74  | 4.12  | 0.75 | 0.97 | Yes |
| Bacteria | Actinobacteria | Actinobacteria | Actinomycetales | Microbacteriaceae   | Salinibacterium      | 0.80%  | -    | 2.12   | -9.33  | 13.57 | 0.72 | 1.00 | 2.89   | -8.28  | 14.07 | 0.61 | 1.00 | 1.95   | -5.41  | 9.31  | 0.60 | 0.95 | 2.54  | -4.59  | 9.67  | 0.49 | 0.96 | Yes |
| Bacteria | Actinobacteria | Actinobacteria | Actinomycetales | Microbacteriaceae   | Actinomycetales      | 5.78%  | -    | -1.31  | -5.65  | 3.03  | 0.55 | 1.00 | -1.70  | -5.93  | 2.54  | 0.43 | 1.00 | -0.48  | -3.27  | 2.31  | 0.74 | 0.96 | -0.74 | -3.45  | 1.96  | 0.59 | 0.96 | Yes |
| Bacteria | Actinobacteria | Actinobacteria | Actinomycetales | Micrococcaceae      | Arthrobacter         | 9.97%  | -    | -0.39  | -3.81  | 3.02  | 0.82 | 1.00 | 0.17   | -3.16  | 3.50  | 0.92 | 1.00 | -1.32  | -3.51  | 0.88  | 0.24 | 0.95 | -0.91 | -3.03  | 1.22  | 0.40 | 0.96 | Yes |
| Bacteria | Actinobacteria | Actinobacteria | Actinomycetales | Micrococcaceae      | Kocuria              | 0.15   | 0.27 | 3.47   | -0.38  | 7.32  | 0.08 | 0.99 | 2.84   | -0.92  | 6.61  | 0.14 | 1.00 | 1.74   | -0.74  | 4.22  | 0.17 | 0.95 | 1.30  | -1.10  | 3.71  | 0.29 | 0.96 | No  |
| Bacteria | Actinobacteria | Actinobacteria | Actinomycetales | Micrococcaceae      | Microbispora         | 3.79%  | -    | 0.69   | -4.67  | 6.05  | 0.80 | 1.00 | 0.02   | -5.21  | 5.25  | 0.99 | 1.00 | 0.31   | -3.13  | 3.76  | 0.86 | 0.96 | -0.14 | -3.47  | 3.20  | 0.94 | 0.99 | Yes |
| Bacteria | Actinobacteria | Actinobacteria | Actinomycetales | Micrococcaceae      | Micrococcus          | 13.16% | -    | 2.65   | -0.35  | 5.65  | 0.08 | 0.99 | 2.66   | -0.27  | 5.58  | 0.08 | 1.00 | 1.96   | 0.04   | 3.89  | 0.05 | 0.95 | 1.98  | 0.11   | 3.84  | 0.04 | 0.96 | Yes |
| Bacteria | Actinobacteria | Actinobacteria | Actinomycetales | Micrococcaceae      | Nesterenkonia        | 5.58%  | -    | -0.66  | -5.07  | 3.75  | 0.77 | 1.00 | -0.67  | -4.97  | 3.63  | 0.76 | 1.00 | 0.92   | -1.91  | 3.76  | 0.52 | 0.95 | 0.92  | -1.83  | 3.67  | 0.51 | 0.96 | Yes |
| Bacteria | Actinobacteria | Actinobacteria | Actinomycetales | Micrococcaceae      | Other                | 1.00%  | -    | 0.42   | -9.78  | 10.63 | 0.94 | 1.00 | -0.29  | -10.25 | 9.66  | 0.95 | 1.00 | -1.91  | -8.47  | 4.65  | 0.57 | 0.95 | -2.42 | -8.77  | 3.93  | 0.46 | 0.96 | Yes |
| Bacteria | Actinobacteria | Actinobacteria | Actinomycetales | Micrococcaceae      | Rothia*              | 0.83   | 0.44 | 1.25   | -1.08  | 3.59  | 0.29 | 1.00 | 0.75   | -1.54  | 3.04  | 0.52 | 1.00 | 0.64   | -0.87  | 2.14  | 0.40 | 0.95 | 0.28  | -1.18  | 1.74  | 0.71 | 0.97 | No  |
| Bacteria | Actinobacteria | Actinobacteria | Actinomycetales | Micrococcaceae      | Actinomycetales      | 22.93% | -    | -0.69  | -3.10  | 1.71  | 0.57 | 1.00 | -0.91  | -3.27  | 1.44  | 0.45 | 1.00 | -0.73  | -2.28  | 0.82  | 0.35 | 0.95 | -0.92 | -2.42  | 0.58  | 0.23 | 0.96 | Yes |
| Bacteria | Actinobacteria | Actinobacteria | Actinomycetales | Micromonosporaceae  | Actinoplanes         | 0.50%  | -    | 1.32   | -13.13 | 15.78 | 0.86 | 1.00 | 2.1    |        |       |      |      |        |        |       |      |      |       |        |       |      |      |     |

|          |                 |                  |                    |                      |                      |        |      |        |        |       |      |      |        |        |       |      |      |       |        |       |      |      |       |        |       |      |      |     |
|----------|-----------------|------------------|--------------------|----------------------|----------------------|--------|------|--------|--------|-------|------|------|--------|--------|-------|------|------|-------|--------|-------|------|------|-------|--------|-------|------|------|-----|
| Bacteria | Actinobacteria  | Actinobacteria   | Actinomycetales    | Propionibacteriaceae |                      | 0.10   | 0.17 | -1.10  | -7.20  | 5.00  | 0.72 | 1.00 | -1.66  | -7.62  | 4.29  | 0.58 | 1.00 | -0.68 | -4.60  | 3.24  | 0.73 | 0.96 | -1.06 | -4.87  | 2.74  | 0.58 | 0.96 | No  |
| Bacteria | Actinobacteria  | Actinobacteria   | Actinomycetales    | Pseudonocardiaceae   | Actinomycetospora    | 2.29%  | -    | 4.45   | -2.46  | 11.35 | 0.21 | 1.00 | 3.53   | -3.21  | 10.27 | 0.30 | 1.00 | 0.39  | -4.05  | 4.83  | 0.86 | 0.96 | -0.24 | -4.55  | 4.06  | 0.91 | 0.99 | Yes |
| Bacteria | Actinobacteria  | Actinobacteria   | Actinomycetales    | Pseudonocardiaceae   | Amycolatopsis        | 0.60%  | -    | -4.62  | -17.71 | 8.47  | 0.49 | 1.00 | -3.10  | -15.88 | 9.67  | 0.63 | 1.00 | -3.35 | -11.76 | 5.06  | 0.44 | 0.95 | -2.25 | -10.41 | 5.90  | 0.59 | 0.96 | Yes |
| Bacteria | Actinobacteria  | Actinobacteria   | Actinomycetales    | Pseudonocardiaceae   | Jiangella            | 0.20%  | -    | -12.60 | -35.30 | 10.09 | 0.28 | 1.00 | -13.66 | -35.80 | 8.48  | 0.23 | 1.00 | -6.27 | -20.86 | 8.33  | 0.40 | 0.95 | -6.99 | -21.13 | 7.15  | 0.33 | 0.96 | Yes |
| Bacteria | Actinobacteria  | Actinobacteria   | Actinomycetales    | Pseudonocardiaceae   | Pseudonocardia       | 2.69%  | -    | -5.91  | -12.19 | 0.37  | 0.07 | 0.99 | -6.21  | -12.33 | -0.08 | 0.05 | 1.00 | -2.37 | -6.41  | 1.67  | 0.25 | 0.95 | -2.56 | -6.48  | 1.35  | 0.20 | 0.96 | Yes |
| Bacteria | Actinobacteria  | Actinobacteria   | Actinomycetales    | Pseudonocardiaceae   | Saccharopolyspora    | 1.30%  | -    | -4.34  | -13.32 | 4.63  | 0.34 | 1.00 | -5.23  | -13.99 | 3.53  | 0.24 | 1.00 | -0.67 | -6.45  | 5.10  | 0.82 | 0.96 | -1.29 | -6.89  | 4.30  | 0.65 | 0.96 | Yes |
| Bacteria | Actinobacteria  | Actinobacteria   | Actinomycetales    | Pseudonocardiaceae   | Thermobispora        | 0.20%  | -    | 18.29  | -4.31  | 40.90 | 0.11 | 1.00 | 13.62  | -8.48  | 35.73 | 0.23 | 1.00 | 10.23 | -4.31  | 24.77 | 0.17 | 0.95 | 6.90  | -7.21  | 21.02 | 0.34 | 0.96 | Yes |
| Bacteria | Actinobacteria  | Actinobacteria   | Actinomycetales    | Pseudonocardiaceae   |                      | 1.10%  | -    | 4.38   | -5.46  | 14.23 | 0.38 | 1.00 | 4.92   | -5.15  | 14.98 | 0.34 | 1.00 | 2.89  | -3.44  | 9.22  | 0.37 | 0.95 | 2.45  | -3.97  | 8.88  | 0.45 | 0.96 | Yes |
| Bacteria | Actinobacteria  | Actinobacteria   | Actinomycetales    | Ruaniaceae           | Other                | 0.20%  | -    | 6.20   | -16.59 | 29.00 | 0.59 | 1.00 | 7.63   | -14.61 | 29.88 | 0.50 | 1.00 | 5.97  | -8.68  | 20.62 | 0.42 | 0.95 | 7.03  | -7.17  | 21.22 | 0.33 | 0.96 | Yes |
| Bacteria | Actinobacteria  | Actinobacteria   | Actinomycetales    | Sporichthyaceae      |                      | 0.20%  | -    | -12.60 | -35.30 | 10.09 | 0.28 | 1.00 | -13.66 | -35.80 | 8.48  | 0.23 | 1.00 | -6.27 | -20.86 | 8.33  | 0.40 | 0.95 | -6.99 | -21.13 | 7.15  | 0.33 | 0.96 | Yes |
| Bacteria | Actinobacteria  | Actinobacteria   | Actinomycetales    | Streptomycetaceae    | Streptomyces         | 3.09%  | -    | -0.74  | -6.63  | 5.14  | 0.80 | 1.00 | -0.34  | -6.08  | 5.40  | 0.91 | 1.00 | -0.97 | -4.75  | 2.81  | 0.61 | 0.95 | -0.67 | -4.34  | 2.99  | 0.72 | 0.97 | Yes |
| Bacteria | Actinobacteria  | Actinobacteria   | Actinomycetales    | Streptosporangiaceae | Nonomuraea           | 0.20%  | -    | -10.94 | -33.63 | 11.75 | 0.34 | 1.00 | -11.36 | -33.50 | 10.78 | 0.31 | 1.00 | -8.74 | -23.32 | 5.84  | 0.24 | 0.95 | -9.00 | -23.13 | 5.13  | 0.21 | 0.96 | Yes |
| Bacteria | Actinobacteria  | Actinobacteria   | Actinomycetales    | Streptosporangiaceae | Other                | 0.60%  | -    | 17.03  | 3.86   | 30.20 | 0.01 | 0.99 | 14.25  | 1.36   | 27.13 | 0.03 | 1.00 | 9.31  | 0.83   | 17.78 | 0.03 | 0.95 | 7.34  | -0.89  | 15.58 | 0.08 | 0.96 | Yes |
| Bacteria | Actinobacteria  | Actinobacteria   | Actinomycetales    | Streptosporangiaceae |                      | 0.10%  | -    | 28.40  | -3.51  | 60.31 | 0.08 | 0.99 | 22.12  | -9.08  | 53.32 | 0.16 | 1.00 | 15.72 | -4.81  | 36.24 | 0.13 | 0.95 | 11.24 | -8.68  | 31.17 | 0.27 | 0.96 | Yes |
| Bacteria | Actinobacteria  | Actinobacteria   | Actinomycetales    | Thermomonosporaceae  | Actinomadura         | 0.50%  | -    | 10.41  | -4.00  | 24.83 | 0.16 | 1.00 | 7.99   | -6.10  | 22.07 | 0.27 | 1.00 | 0.53  | -8.74  | 9.81  | 0.91 | 0.97 | -1.18 | -10.18 | 7.81  | 0.80 | 0.97 | Yes |
| Bacteria | Actinobacteria  | Actinobacteria   | Actinomycetales    | Williamsiaceae       | Williamsia           | 0.20%  | -    | -1.56  | -24.19 | 21.08 | 0.89 | 1.00 | -1.15  | -23.24 | 20.94 | 0.92 | 1.00 | -8.50 | -23.04 | 6.04  | 0.25 | 0.95 | -8.18 | -22.27 | 5.91  | 0.25 | 0.96 | Yes |
| Bacteria | Actinobacteria  | Actinobacteria   | Actinomycetales    | Yaniellaceae         | Yaniella             | 3.49%  | -    | -6.06  | -11.56 | -0.56 | 0.03 | 0.99 | -4.13  | -9.53  | 1.27  | 0.13 | 1.00 | -1.44 | -4.98  | 2.10  | 0.43 | 0.95 | -0.01 | -3.46  | 3.44  | 1.00 | 1.00 | Yes |
| Bacteria | Actinobacteria  | Actinobacteria   | Actinomycetales    |                      |                      | 9.07%  | -    | 1.41   | -2.12  | 4.95  | 0.43 | 1.00 | 1.21   | -2.24  | 4.66  | 0.49 | 1.00 | -0.25 | -2.52  | 2.02  | 0.83 | 0.96 | -0.39 | -2.59  | 1.81  | 0.73 | 0.97 | Yes |
| Bacteria | Actinobacteria  | Actinobacteria   | Bifidobacteriales  | Bifidobacteriaceae   | Bifidobacterium      | 2.71   | 0.63 | 0.46   | -1.35  | 2.27  | 0.62 | 1.00 | 0.57   | -1.19  | 2.34  | 0.53 | 1.00 | -0.31 | -1.47  | 0.85  | 0.60 | 0.95 | -0.24 | -1.37  | 0.88  | 0.67 | 0.96 | No  |
| Bacteria | Actinobacteria  | Actinobacteria   | Bifidobacteriales  | Bifidobacteriaceae   | Other                | 12.76% | -    | -1.06  | -4.12  | 2.00  | 0.50 | 1.00 | -1.02  | -4.02  | 1.97  | 0.50 | 1.00 | -0.38 | -2.34  | 1.59  | 0.71 | 0.95 | -0.41 | -2.32  | 1.51  | 0.68 | 0.96 | Yes |
| Bacteria | Actinobacteria  | Actinobacteria   | Bifidobacteriales  | Bifidobacteriaceae   | Scardovia            | 0.11   | 0.19 | 2.21   | -3.06  | 7.48  | 0.41 | 1.00 | 2.37   | -2.78  | 7.51  | 0.37 | 1.00 | 0.34  | -3.05  | 3.73  | 0.84 | 0.96 | 0.50  | -2.78  | 3.79  | 0.76 | 0.97 | No  |
| Bacteria | Actinobacteria  | Actinobacteria   | Bifidobacteriales  | Bifidobacteriaceae   |                      | 7.78%  | -    | -0.20  | -3.99  | 3.59  | 0.92 | 1.00 | -0.61  | -4.31  | 3.09  | 0.75 | 1.00 | 0.79  | -1.64  | 3.23  | 0.52 | 0.95 | 0.52  | -1.84  | 2.88  | 0.67 | 0.96 | Yes |
| Bacteria | Actinobacteria  | Actinobacteria   | Coriobacteriales   | Coriobacteriaceae    | Adlercreutzia†       | 1.50   | 0.56 | -2.52  | -4.47  | -0.57 | 0.01 | 0.99 | -2.53  | -4.44  | -0.62 | 0.01 | 1.00 | -1.38 | -2.64  | -0.12 | 0.03 | 0.95 | -1.39 | -2.61  | -0.17 | 0.03 | 0.96 | No  |
| Bacteria | Actinobacteria  | Actinobacteria   | Coriobacteriales   | Coriobacteriaceae    | Atopobium            | 0.26   | 0.27 | 2.86   | -0.85  | 6.57  | 0.13 | 1.00 | 2.76   | -0.86  | 6.38  | 0.14 | 1.00 | 1.18  | -1.21  | 3.57  | 0.33 | 0.95 | 1.11  | -1.20  | 3.43  | 0.34 | 0.96 | No  |
| Bacteria | Actinobacteria  | Actinobacteria   | Coriobacteriales   | Coriobacteriaceae    | Collinsella          | 0.61   | 0.46 | 0.42   | -1.82  | 2.67  | 0.71 | 1.00 | -0.13  | -2.33  | 2.07  | 0.91 | 1.00 | 0.51  | -0.93  | 1.96  | 0.49 | 0.95 | 0.12  | -1.28  | 1.53  | 0.87 | 0.98 | No  |
| Bacteria | Actinobacteria  | Actinobacteria   | Coriobacteriales   | Coriobacteriaceae    | Eggerthella†         | 1.52   | 0.54 | 0.47   | -1.79  | 2.74  | 0.68 | 1.00 | 0.60   | -1.62  | 2.82  | 0.59 | 1.00 | -0.53 | -1.98  | 0.93  | 0.48 | 0.95 | -0.51 | -1.93  | 0.91  | 0.48 | 0.96 | No  |
| Bacteria | Actinobacteria  | Actinobacteria   | Coriobacteriales   | Coriobacteriaceae    | Other                | 0.20%  | -    | 18.18  | -4.48  | 40.85 | 0.12 | 1.00 | 14.45  | -1.70  | 36.60 | 0.20 | 1.00 | 15.58 | 1.02   | 30.13 | 0.04 | 0.95 | 12.94 | -1.19  | 27.07 | 0.07 | 0.96 | Yes |
| Bacteria | Actinobacteria  | Actinobacteria   | Coriobacteriales   | Coriobacteriaceae    | Slackia              | 0.65   | 0.50 | 0.78   | -1.26  | 2.83  | 0.45 | 1.00 | 0.63   | -1.37  | 2.62  | 0.54 | 1.00 | 0.88  | -0.43  | 2.19  | 0.19 | 0.95 | 0.77  | -0.51  | 2.04  | 0.24 | 0.96 | No  |
| Bacteria | Actinobacteria  | Actinobacteria   | Coriobacteriales   | Coriobacteriaceae    |                      | 1.76   | 0.41 | -1.80  | -4.30  | 0.70  | 0.16 | 1.00 | -1.72  | -4.17  | 0.72  | 0.17 | 1.00 | -0.93 | -2.54  | 0.68  | 0.26 | 0.95 | -0.87 | -2.43  | 0.69  | 0.27 | 0.96 | No  |
| Bacteria | Actinobacteria  | Actinobacteria   | MB-A2-108          | 0319-7L14            |                      | 0.90%  | -    | -3.72  | -14.44 | 6.99  | 0.50 | 1.00 | -2.35  | -12.82 | 8.12  | 0.66 | 1.00 | -8.11 | -14.98 | -1.24 | 0.02 | 0.95 | -7.12 | -13.78 | -0.45 | 0.04 | 0.96 | Yes |
| Bacteria | Actinobacteria  | Actinobacteria   | MB-A2-108          |                      |                      | 0.20%  | -    | -12.60 | -35.30 | 10.09 | 0.28 | 1.00 | -13.66 | -35.80 | 8.48  | 0.23 | 1.00 | -6.27 | -20.86 | 8.33  | 0.40 | 0.95 | -6.99 | -21.13 | 7.15  | 0.33 | 0.96 | Yes |
| Bacteria | Actinobacteria  | Actinobacteria   | Nitрилiruptoria    | Euzebyales           | Euzebyaceae          | 0.60%  | -    | 9.31   | -3.78  | 22.40 | 0.16 | 1.00 | 5.37   | -7.46  | 18.20 | 0.41 | 1.00 | 3.61  | -4.81  | 12.03 | 0.40 | 0.95 | 0.79  | -7.40  | 8.98  | 0.85 | 0.98 | Yes |
| Bacteria | Actinobacteria  | Actinobacteria   | Nitрилiruptoria    | Nitрилiruptorales    | Nitрилiruptoraceae   | 2.59%  | -    | 0.45   | -5.93  | 6.83  | 0.89 | 1.00 | -0.01  | -6.23  | 6.22  | 1.00 | 1.00 | 2.09  | -2.01  | 6.19  | 0.32 | 0.95 | 1.77  | -2.20  | 5.74  | 0.38 | 0.96 | Yes |
| Bacteria | Actinobacteria  | Actinobacteria   | OPB41              |                      |                      | 0.90%  | -    | -4.21  | -15.02 | 6.59  | 0.44 | 1.00 | -5.11  | -15.65 | 5.43  | 0.34 | 1.00 | -4.56 | -11.50 | 2.38  | 0.20 | 0.95 | -5.19 | -11.91 | 1.54  | 0.13 | 0.96 | Yes |
| Bacteria | Actinobacteria  | Actinobacteria   | Rubrobacteria      | Rubrobacterales      | Rubrobacteraceae     | 20.74% | -    | 1.13   | -1.42  | 3.67  | 0.39 | 1.00 | 1.35   | -1.14  | 3.84  | 0.29 | 1.00 | 0.50  | -1.14  | 2.14  | 0.55 | 0.95 | 0.63  | -0.96  | 2.22  | 0.44 | 0.96 | Yes |
| Bacteria | Actinobacteria  | Actinobacteria   | Rubrobacteria      | Rubrobacterales      | Rubrobacteraceae     | 0.10%  | -    | -11.25 | -43.23 | 20.73 | 0.49 | 1.00 | -11.11 | -42.31 | 20.09 | 0.48 | 1.00 | -6.49 | -27.04 | 14.07 | 0.54 | 0.95 | -6.35 | -26.27 | 13.57 | 0.53 | 0.96 | Yes |
| Bacteria | Actinobacteria  | Actinobacteria   | Thermoleophilia    | Gaiellales           | AK1AB1_02E           | 0.40%  | -    | 2.86   | -13.15 | 18.87 | 0.73 | 1.00 | -0.18  | -15.83 | 15.46 | 0.98 | 1.00 | 4.79  | -5.50  | 15.08 | 0.36 | 0.95 | 2.64  | -7.34  | 12.63 | 0.60 | 0.96 | Yes |
| Bacteria | Actinobacteria  | Actinobacteria   | Thermoleophilia    | Gaiellales           | Gaiellaceae          | 2.49%  | -    | 0.24   | -6.27  | 6.75  | 0.94 | 1.00 | 0.01   | -6.35  | 6.36  | 1.00 | 1.00 | -2.30 | -6.48  | 1.88  | 0.28 | 0.95 | -2.46 | -6.51  | 1.59  | 0.23 | 0.96 | Yes |
| Bacteria | Actinobacteria  | Actinobacteria   | Thermoleophilia    | Gaiellales           |                      | 0.40%  | -    | 3.03   | -13.02 | 19.08 | 0.71 | 1.00 | 2.20   | -13.46 | 17.87 | 0.78 | 1.00 | -0.57 | -10.89 | 9.76  | 0.91 | 0.97 | -1.14 | -11.14 | 8.86  | 0.82 | 0.97 | Yes |
| Bacteria | Actinobacteria  | Actinobacteria   | Thermoleophilia    | Solirubrobacterales  | Conexibacteraceae    | 1.30%  | -    | 0.46   | -8.58  | 9.51  | 0.92 | 1.00 | -0.43  | -9.25  | 8.40  | 0.92 | 1.00 | -4.21 | -10.02 | 1.59  | 0.15 | 0.95 | -4.83 | -10.45 | 0.80  | 0.09 | 0.96 | Yes |
| Bacteria | Actinobacteria  | Actinobacteria   | Thermoleophilia    | Solirubrobacterales  | Other                | 0.10%  | -    | -13.84 | -45.92 | 18.23 | 0.40 | 1.00 | -16.09 | -47.39 | 15.21 | 0.31 | 1.00 | -5.98 | -26.61 | 14.64 | 0.57 | 0.95 | -7.57 | -27.55 | 12.42 | 0.46 | 0.96 | Yes |
| Bacteria | Actinobacteria  | Actinobacteria   | Thermoleophilia    | Solirubrobacterales  | Patulibacteraceae    | 0.20%  | -    | 7.02   | -15.78 | 29.81 | 0.55 | 1.00 | 10.38  | -11.88 | 32.64 | 0.36 | 1.00 | 0.47  | -14.19 | 15.12 | 0.95 | 0.98 | 2.88  | -11.33 | 17.09 | 0.69 | 0.96 | Yes |
| Bacteria | Actinobacteria  | Actinobacteria   | Thermoleophilia    | Solirubrobacterales  | Patulibacteraceae    | 1.50%  | -    | 6.23   | -2.08  | 14.54 | 0.14 | 1.00 | 5.05   | -3.07  | 13.17 | 0.22 | 1.00 | -0.28 | -5.63  | 5.07  | 0.92 | 0.97 | -1.12 | -6.31  | 4.07  | 0.67 | 0.96 | Yes |
| Bacteria | Actinobacteria  | Actinobacteria   | Thermoleophilia    | Solirubrobacterales  | Solirubrobacteraceae | 2.89%  | -    | 0.92   | -5.18  | 7.01  | 0.77 | 1.00 | 0.99   | -4.96  | 6.93  | 0.75 | 1.00 | 0.23  | -3.69  | 4.15  | 0.91 | 0.97 | 0.29  | -3.50  | 4.09  | 0.88 | 0.98 | Yes |
| Bacteria | Actinobacteria  | Actinobacteria   | Thermoleophilia    | Solirubrobacterales  |                      | 5.18%  | -    | -1.12  | -5.70  | 3.46  | 0.63 | 1.00 | -1.48  | -5.95  | 2.99  | 0.52 | 1.00 | -1.47 | -4.42  | 1.47  | 0.33 | 0.95 | -1.71 | -4.56  | 1.14  | 0.24 | 0.96 | Yes |
| Bacteria | Actinobacteria  | Actinobacteria   | AD3                | ABS-6                |                      | 0.30%  | -    | 3.71   | -14.78 | 22.20 | 0.69 | 1.00 | 4.98   | -13.06 | 23.02 | 0.59 | 1.00 | 5.66  | -6.23  | 17.54 | 0.35 | 0.95 | 6.57  | -4.94  | 18.09 | 0.26 | 0.96 | Yes |
| Bacteria | Armatimonadetes | [Fimbriimonadia] | [Fimbriimonadales] | [Fimbriimonadaceae]  | Fimbriimonas         | 1.89%  | -    | 1.68   | -5.73  | 9.09  | 0.66 | 1.00 | 1.19   | -6.04  | 8.43  | 0.75 | 1.00 | -0.04 | -4.80  | 4.73  | 0.99 | 0.99 | -0.37 | -4.99  | 4.24  | 0.87 | 0.98 | Yes |
| Bacteria | Armatimonadetes | [Fimbriimonadia] | [Fimbriimonadales] | [Fimbriimonadaceae]  |                      | 1.30%  | -    | -4.22  | -13.26 | 4.81  | 0.36 | 1.   |        |        |       |      |      |       |        |       |      |      |       |        |       |      |      |     |

|          |               |                |                  |                      |                  |        |      |        |        |       |      |      |        |        |       |      |      |       |        |       |      |      |       |        |       |      |      |     |
|----------|---------------|----------------|------------------|----------------------|------------------|--------|------|--------|--------|-------|------|------|--------|--------|-------|------|------|-------|--------|-------|------|------|-------|--------|-------|------|------|-----|
| Bacteria | Bacteroidetes | Bacteroidia    | Bacteroidales    | [Paraprevotellaceae] | CF231            | 13.26% | -    | -0.33  | -3.41  | 2.76  | 0.84 | 1.00 | 0.02   | -3.00  | 3.03  | 0.99 | 1.00 | -0.38 | -2.36  | 1.61  | 0.71 | 0.95 | -0.12 | -2.05  | 1.80  | 0.90 | 0.99 | Yes |
| Bacteria | Bacteroidetes | Bacteroidia    | Bacteroidales    | [Paraprevotellaceae] | Other            | 0.20%  | -    | -7.63  | -30.32 | 15.06 | 0.51 | 1.00 | -10.92 | -33.08 | 11.23 | 0.33 | 1.00 | 0.54  | -14.05 | 15.13 | 0.94 | 0.98 | -1.82 | -15.97 | 12.33 | 0.80 | 0.97 | Yes |
| Bacteria | Bacteroidetes | Bacteroidia    | Bacteroidales    | [Paraprevotellaceae] | Paraprevotella   | 0.18   | 0.34 | 1.12   | -1.91  | 4.15  | 0.47 | 1.00 | 0.42   | -2.54  | 3.38  | 0.78 | 1.00 | 0.71  | -1.23  | 2.66  | 0.47 | 0.95 | 0.22  | -1.67  | 2.11  | 0.82 | 0.97 | No  |
| Bacteria | Bacteroidetes | Bacteroidia    | Bacteroidales    | [Paraprevotellaceae] | YRC22            | 3.09%  | -    | 1.09   | -4.78  | 6.95  | 0.72 | 1.00 | 1.43   | -4.30  | 7.15  | 0.62 | 1.00 | -1.67 | -5.44  | 2.10  | 0.39 | 0.95 | -1.41 | -5.07  | 2.24  | 0.45 | 0.96 | Yes |
| Bacteria | Bacteroidetes | Bacteroidia    | Bacteroidales    | [Paraprevotellaceae] |                  | 14.46% | -    | 0.25   | -2.67  | 3.17  | 0.87 | 1.00 | 0.76   | -2.10  | 3.61  | 0.60 | 1.00 | -0.08 | -1.95  | 1.80  | 0.94 | 0.98 | 0.30  | -1.52  | 2.12  | 0.75 | 0.97 | Yes |
| Bacteria | Bacteroidetes | Bacteroidia    | Bacteroidales    | BA008                |                  | 0.40%  | -    | 12.63  | -3.31  | 28.57 | 0.12 | 1.00 | 11.03  | -4.53  | 26.59 | 0.16 | 1.00 | 12.41 | 2.18   | 22.64 | 0.02 | 0.95 | 11.29 | 1.37   | 21.20 | 0.03 | 0.96 | Yes |
| Bacteria | Bacteroidetes | Bacteroidia    | Bacteroidales    | Bacteroidaceae       | 5-7N15           | 2.39%  | -    | -4.77  | -11.39 | 1.86  | 0.16 | 1.00 | -3.50  | -9.98  | 2.98  | 0.29 | 1.00 | -2.73 | -6.99  | 1.53  | 0.21 | 0.95 | -1.82 | -5.95  | 2.32  | 0.39 | 0.96 | Yes |
| Bacteria | Bacteroidetes | Bacteroidia    | Bacteroidales    | Bacteroidaceae       | Bacteroides      | 2.12   | 0.61 | 0.96   | -0.75  | 2.68  | 0.27 | 1.00 | 0.96   | -0.72  | 2.64  | 0.26 | 1.00 | -0.14 | -1.24  | 0.97  | 0.81 | 0.96 | -0.15 | -1.22  | 0.92  | 0.78 | 0.97 | No  |
| Bacteria | Bacteroidetes | Bacteroidia    | Bacteroidales    | Bacteroidaceae       | BF311            | 0.60%  | -    | -10.25 | -23.38 | 2.88  | 0.13 | 1.00 | -11.31 | -24.12 | 1.50  | 0.08 | 1.00 | -3.67 | -12.12 | 4.78  | 0.39 | 0.95 | -4.43 | -12.61 | 3.76  | 0.29 | 0.96 | Yes |
| Bacteria | Bacteroidetes | Bacteroidia    | Bacteroidales    | Bacteroidaceae       | Other            | 0.10%  | -    | 32.42  | 0.54   | 64.30 | 0.05 | 0.99 | 31.06  | -0.05  | 62.17 | 0.05 | 1.00 | 37.86 | 17.46  | 58.27 | 0.00 | 0.14 | 36.94 | 17.17  | 56.70 | 0.00 | 0.13 | Yes |
| Bacteria | Bacteroidetes | Bacteroidia    | Bacteroidales    | Bacteroidaceae       |                  | 1.79%  | -    | -0.58  | -8.23  | 7.07  | 0.88 | 1.00 | 0.25   | -7.21  | 7.72  | 0.95 | 1.00 | -0.94 | -5.86  | 3.98  | 0.71 | 0.95 | -0.33 | -5.10  | 4.43  | 0.89 | 0.99 | Yes |
| Bacteria | Bacteroidetes | Bacteroidia    | Bacteroidales    | BS11                 |                  | 1.79%  | -    | -4.12  | -11.89 | 3.66  | 0.30 | 1.00 | -4.78  | -12.37 | 2.81  | 0.22 | 1.00 | -0.64 | -5.64  | 4.36  | 0.80 | 0.96 | -1.10 | -5.95  | 3.74  | 0.66 | 0.96 | Yes |
| Bacteria | Bacteroidetes | Bacteroidia    | Bacteroidales    | Marinilabiaceae      |                  | 1.30%  | -    | -1.75  | -10.80 | 7.29  | 0.70 | 1.00 | -0.38  | -9.21  | 8.46  | 0.93 | 1.00 | -3.38 | -9.19  | 2.43  | 0.25 | 0.95 | -2.41 | -8.05  | 3.22  | 0.40 | 0.96 | Yes |
| Bacteria | Bacteroidetes | Bacteroidia    | Bacteroidales    | Other                |                  | 0.70%  | -    | -3.36  | -15.48 | 8.77  | 0.59 | 1.00 | -3.92  | -15.75 | 7.91  | 0.52 | 1.00 | 0.55  | -7.24  | 8.35  | 0.89 | 0.97 | 0.15  | -7.41  | 7.70  | 0.97 | 0.99 | Yes |
| Bacteria | Bacteroidetes | Bacteroidia    | Bacteroidales    | p-2534-18B5          |                  | 0.20%  | -    | 13.55  | -9.04  | 36.13 | 0.24 | 1.00 | 17.10  | -4.94  | 39.15 | 0.13 | 1.00 | -3.94 | -18.46 | 10.59 | 0.59 | 0.95 | -1.43 | -15.52 | 12.66 | 0.84 | 0.98 | Yes |
| Bacteria | Bacteroidetes | Bacteroidia    | Bacteroidales    | Porphyromonadaceae   | Dysgonomonas     | 1.30%  | -    | 3.51   | -5.43  | 12.46 | 0.44 | 1.00 | 4.13   | -4.60  | 12.86 | 0.35 | 1.00 | 2.08  | -3.67  | 7.83  | 0.48 | 0.95 | 2.53  | -3.04  | 8.10  | 0.37 | 0.96 | Yes |
| Bacteria | Bacteroidetes | Bacteroidia    | Bacteroidales    | Porphyromonadaceae   | Paludibacter     | 1.30%  | -    | 1.62   | -7.33  | 10.56 | 0.72 | 1.00 | 1.70   | -7.03  | 10.43 | 0.70 | 1.00 | -2.28 | -8.03  | 3.47  | 0.44 | 0.95 | -2.21 | -7.78  | 3.36  | 0.44 | 0.96 | Yes |
| Bacteria | Bacteroidetes | Bacteroidia    | Bacteroidales    | Porphyromonadaceae   | Parabacteroides  | 0.82   | 0.58 | 0.42   | -1.39  | 2.23  | 0.65 | 1.00 | 0.37   | -1.40  | 2.14  | 0.68 | 1.00 | -0.10 | -1.26  | 1.07  | 0.87 | 0.96 | -0.13 | -1.26  | 1.00  | 0.82 | 0.97 | No  |
| Bacteria | Bacteroidetes | Bacteroidia    | Bacteroidales    | Porphyromonadaceae   | Porphyromonas    | 21.83% | -    | -0.28  | -2.77  | 2.20  | 0.82 | 1.00 | -0.31  | -2.74  | 2.11  | 0.80 | 1.00 | -0.13 | -1.73  | 1.47  | 0.87 | 0.96 | -0.14 | -1.69  | 1.40  | 0.85 | 0.98 | Yes |
| Bacteria | Bacteroidetes | Bacteroidia    | Bacteroidales    | Porphyromonadaceae   | Tannerella       | 0.70%  | -    | 0.09   | -12.11 | 12.28 | 0.99 | 1.00 | -0.99  | -12.89 | 10.91 | 0.87 | 1.00 | -0.12 | -7.96  | 7.72  | 0.98 | 0.99 | -0.88 | -8.48  | 6.72  | 0.82 | 0.97 | Yes |
| Bacteria | Bacteroidetes | Bacteroidia    | Bacteroidales    | Porphyromonadaceae   |                  | 2.69%  | -    | 1.68   | -4.64  | 8.00  | 0.60 | 1.00 | 2.87   | -3.31  | 9.04  | 0.36 | 1.00 | -0.58 | -4.64  | 3.49  | 0.78 | 0.96 | 0.27  | -3.67  | 4.21  | 0.89 | 0.99 | Yes |
| Bacteria | Bacteroidetes | Bacteroidia    | Bacteroidales    | Prevotellaceae       | Prevotella       | 1.45   | 0.79 | 1.09   | -0.24  | 2.42  | 0.11 | 1.00 | 0.87   | -0.44  | 2.17  | 0.19 | 1.00 | 0.49  | -0.36  | 1.35  | 0.26 | 0.95 | 0.33  | -0.50  | 1.16  | 0.44 | 0.96 | No  |
| Bacteria | Bacteroidetes | Bacteroidia    | Bacteroidales    | Prevotellaceae       |                  | 0.10%  | -    | 21.50  | -10.39 | 53.39 | 0.19 | 1.00 | 23.04  | -8.08  | 54.15 | 0.15 | 1.00 | -8.43 | -28.94 | 12.08 | 0.42 | 0.95 | -7.32 | -27.20 | 12.56 | 0.47 | 0.96 | Yes |
| Bacteria | Bacteroidetes | Bacteroidia    | Bacteroidales    | RF16                 |                  | 2.79%  | -    | -0.14  | -6.37  | 6.08  | 0.96 | 1.00 | 0.95   | -5.13  | 7.03  | 0.76 | 1.00 | -1.84 | -5.84  | 2.16  | 0.37 | 0.95 | -1.07 | -4.95  | 2.81  | 0.59 | 0.96 | Yes |
| Bacteria | Bacteroidetes | Bacteroidia    | Bacteroidales    | Rikenellaceae        | AF12             | 3.89%  | -    | -0.37  | -5.61  | 4.86  | 0.89 | 1.00 | -1.15  | -6.27  | 3.96  | 0.66 | 1.00 | -0.27 | -3.64  | 3.10  | 0.88 | 0.96 | -0.81 | -4.08  | 2.45  | 0.63 | 0.96 | Yes |
| Bacteria | Bacteroidetes | Bacteroidia    | Bacteroidales    | Rikenellaceae        | Blvii28          | 0.20%  | -    | 5.19   | -17.47 | 27.84 | 0.65 | 1.00 | 5.30   | -16.80 | 27.41 | 0.64 | 1.00 | -2.80 | -17.36 | 11.77 | 0.71 | 0.95 | -2.75 | -16.86 | 11.36 | 0.70 | 0.97 | Yes |
| Bacteria | Bacteroidetes | Bacteroidia    | Bacteroidales    | Rikenellaceae        | Rikenella        | 1.00%  | -    | 3.31   | -6.92  | 13.54 | 0.53 | 1.00 | 2.02   | -7.97  | 12.01 | 0.69 | 1.00 | 0.70  | -5.88  | 7.28  | 0.83 | 0.96 | -0.21 | -6.59  | 6.16  | 0.95 | 0.99 | Yes |
| Bacteria | Bacteroidetes | Bacteroidia    | Bacteroidales    | Rikenellaceae        |                  | 0.46   | 0.45 | 0.76   | -1.51  | 3.02  | 0.51 | 1.00 | 0.75   | -1.46  | 2.97  | 0.50 | 1.00 | 0.52  | -0.93  | 1.98  | 0.48 | 0.95 | 0.52  | -0.89  | 1.93  | 0.47 | 0.96 | No  |
| Bacteria | Bacteroidetes | Bacteroidia    | Bacteroidales    | S24-7                |                  | 0.59   | 0.74 | 0.47   | -0.93  | 1.87  | 0.51 | 1.00 | 0.38   | -0.99  | 1.75  | 0.59 | 1.00 | -0.07 | -0.97  | 0.83  | 0.87 | 0.96 | -0.13 | -1.00  | 0.75  | 0.78 | 0.97 | No  |
| Bacteria | Bacteroidetes | Bacteroidia    | Bacteroidales    | SB-1                 |                  | 0.10%  | -    | 5.94   | -26.07 | 37.96 | 0.72 | 1.00 | 12.94  | -18.35 | 44.23 | 0.42 | 1.00 | 4.16  | -16.42 | 24.75 | 0.69 | 0.95 | 9.13  | -10.84 | 29.10 | 0.37 | 0.96 | Yes |
| Bacteria | Bacteroidetes | Bacteroidia    | Bacteroidales    |                      |                  | 0.16   | 0.34 | 1.55   | -1.45  | 4.54  | 0.31 | 1.00 | 1.04   | -1.88  | 3.97  | 0.48 | 1.00 | -0.40 | -2.33  | 1.53  | 0.68 | 0.95 | -0.75 | -2.61  | 1.12  | 0.43 | 0.96 | No  |
| Bacteria | Bacteroidetes | Cytophagia     | Cytophagales     | Cyclobacteriaceae    |                  | 2.19%  | -    | 0.43   | -6.52  | 7.38  | 0.90 | 1.00 | 0.39   | -6.39  | 7.17  | 0.91 | 1.00 | -1.13 | -5.60  | 3.33  | 0.62 | 0.95 | -1.15 | -5.47  | 3.18  | 0.60 | 0.96 | Yes |
| Bacteria | Bacteroidetes | Cytophagia     | Cytophagales     | Cytophagaceae        | Adhaeribacter    | 0.80%  | -    | -5.29  | -16.71 | 6.12  | 0.36 | 1.00 | -4.94  | -16.08 | 6.19  | 0.38 | 1.00 | -2.47 | -9.80  | 4.87  | 0.51 | 0.95 | -2.18 | -9.29  | 4.93  | 0.55 | 0.96 | Yes |
| Bacteria | Bacteroidetes | Cytophagia     | Cytophagales     | Cytophagaceae        | Dyadobacter      | 0.10%  | -    | 6.37   | -26.07 | 38.81 | 0.70 | 1.00 | 11.03  | -20.65 | 42.70 | 0.49 | 1.00 | 1.94  | -18.92 | 22.80 | 0.86 | 0.96 | 5.28  | -14.94 | 25.50 | 0.61 | 0.96 | Yes |
| Bacteria | Bacteroidetes | Cytophagia     | Cytophagales     | Cytophagaceae        | Hymenobacter     | 0.60%  | -    | -3.28  | -16.40 | 9.84  | 0.62 | 1.00 | -5.07  | -19.09 | 8.95  | 0.48 | 1.00 | -3.53 | -11.96 | 4.91  | 0.41 | 0.95 | -6.62 | -15.56 | 2.33  | 0.15 | 0.96 | Yes |
| Bacteria | Bacteroidetes | Cytophagia     | Cytophagales     | Cytophagaceae        | Larkinella       | 0.40%  | -    | 2.18   | -14.08 | 18.44 | 0.79 | 1.00 | 0.58   | -15.29 | 16.45 | 0.94 | 1.00 | 3.65  | -6.80  | 14.10 | 0.49 | 0.95 | 2.53  | -7.60  | 12.66 | 0.62 | 0.96 | Yes |
| Bacteria | Bacteroidetes | Cytophagia     | Cytophagales     | Cytophagaceae        | Leadbetterella   | 1.20%  | -    | -2.64  | -12.05 | 6.78  | 0.58 | 1.00 | -2.95  | -12.14 | 6.24  | 0.53 | 1.00 | -1.92 | -7.97  | 4.14  | 0.53 | 0.95 | -2.10 | -7.97  | 3.76  | 0.48 | 0.96 | Yes |
| Bacteria | Bacteroidetes | Cytophagia     | Cytophagales     | Cytophagaceae        | Pontibacter      | 0.30%  | -    | -10.43 | -29.03 | 8.16  | 0.27 | 1.00 | -10.10 | -28.24 | 8.04  | 0.27 | 1.00 | -5.03 | -16.99 | 6.93  | 0.41 | 0.95 | -4.76 | -16.35 | 6.82  | 0.42 | 0.96 | Yes |
| Bacteria | Bacteroidetes | Cytophagia     | Cytophagales     | Cytophagaceae        | Rhodocyclophaga  | 0.20%  | -    | -18.79 | -41.39 | 3.80  | 0.10 | 1.00 | -18.04 | -40.08 | 4.01  | 0.11 | 1.00 | -8.28 | -22.82 | 6.25  | 0.26 | 0.95 | -7.70 | -21.79 | 6.38  | 0.28 | 0.96 | Yes |
| Bacteria | Bacteroidetes | Cytophagia     | Cytophagales     | Cytophagaceae        | Runella          | 0.10%  | -    | 1.15   | -30.84 | 33.13 | 0.94 | 1.00 | -1.39  | -32.60 | 29.82 | 0.93 | 1.00 | 1.86  | -18.70 | 22.42 | 0.86 | 0.96 | 0.05  | -19.88 | 19.97 | 1.00 | 1.00 | Yes |
| Bacteria | Bacteroidetes | Cytophagia     | Cytophagales     | Cytophagaceae        |                  | 3.59%  | -    | -0.75  | -6.24  | 4.75  | 0.79 | 1.00 | -2.02  | -7.39  | 3.35  | 0.46 | 1.00 | -2.09 | -5.62  | 1.44  | 0.24 | 0.95 | -2.99 | -6.41  | 0.44  | 0.09 | 0.96 | Yes |
| Bacteria | Bacteroidetes | Cytophagia     | Cytophagales     | Flammeovirgaceae     | Roseivirga       | 0.60%  | -    | -3.77  | -16.89 | 9.35  | 0.57 | 1.00 | -1.31  | -14.13 | 11.50 | 0.84 | 1.00 | -1.67 | -10.10 | 6.76  | 0.70 | 0.95 | 0.09  | -8.09  | 8.27  | 0.98 | 1.00 | Yes |
| Bacteria | Bacteroidetes | Cytophagia     | Cytophagales     | Flammeovirgaceae     |                  | 1.99%  | -    | -5.79  | -13.14 | 1.57  | 0.12 | 1.00 | -4.94  | -12.12 | 2.24  | 0.18 | 1.00 | -2.61 | -7.35  | 2.12  | 0.28 | 0.95 | -2.01 | -6.59  | 2.58  | 0.39 | 0.96 | Yes |
| Bacteria | Bacteroidetes | Flavobacteriia | Flavobacteriales | [Weeksellaceae]      | Chryseobacterium | 4.09%  | -    | 3.21   | -1.89  | 8.31  | 0.22 | 1.00 | 2.57   | -2.41  | 7.55  | 0.31 | 1.00 | 2.84  | -0.44  | 6.11  | 0.09 | 0.95 | 2.39  | -0.79  | 5.57  | 0.14 | 0.96 | Yes |
| Bacteria | Bacteroidetes | Flavobacteriia | Flavobacteriales | [Weeksellaceae]      | Cloacibacterium  | 2.79%  | -    | 2.49   | -3.64  | 8.63  | 0.43 | 1.00 | 2.18   | -3.81  | 8.17  | 0.47 | 1.00 | 2.40  | -1.54  | 6.35  | 0.23 | 0.95 | 2.19  | -1.63  | 6.01  | 0.26 | 0.96 | Yes |
| Bacteria | Bacteroidetes | Flavobacteriia | Flavobacteriales | [Weeksellaceae]      | Elizabethkingia  | 1.10%  | -    | 2.30   | -7.39  | 11.99 | 0.64 | 1.00 | 1.27   | -8.19  | 10.73 | 0.79 | 1.00 | 4.00  | -2.23  | 10.22 | 0.21 | 0.95 | 3.27  | -2.77  | 9.30  | 0.29 | 0.96 | Yes |
| Bacteria | Bacteroidetes | Flavobacteriia | Flavobacteriales | [Weeksellaceae]      | Other            | 0.10%  | -    | 12.41  | -19.53 | 44.34 | 0.45 | 1.00 | 10.49  | -20.67 | 41.65 | 0.51 | 1.00 | 17.03 | -3.47  | 37.54 | 0.10 | 0.95 | 15.73 | -4.14  | 35.61 | 0.12 | 0.96 | Yes |
| Bacteria | Bacteroidetes | Flavobacteriia | Flavobacteriales | [Weeksellaceae]      | Wautersiella     | 0.10%  | -    | -17.53 | -49.54 | 14.47 | 0.28 | 1.00 | -19.96 | -51.19 | 11.27 | 0.21 | 1.00 | -2.65 | -23.24 | 17.94 | 0.80 | 0.96 | -4.41 | -24.36 | 15.54 | 0.66 | 0.96 | Yes |
| B        |               |                |                  |                      |                  |        |      |        |        |       |      |      |        |        |       |      |      |       |        |       |      |      |       |        |       |      |      |     |

|          |               |                       |                        |                         |              |       |      |        |        |       |      |      |        |        |       |      |      |       |        |       |      |      |       |        |       |      |      |     |
|----------|---------------|-----------------------|------------------------|-------------------------|--------------|-------|------|--------|--------|-------|------|------|--------|--------|-------|------|------|-------|--------|-------|------|------|-------|--------|-------|------|------|-----|
| Bacteria | Chlorobi      | BSV26                 | A89                    |                         |              | 0.20% | -    | 2.87   | -19.74 | 25.48 | 0.80 | 1.00 | -1.25  | -23.35 | 20.84 | 0.91 | 1.00 | 9.15  | -5.38  | 23.67 | 0.22 | 0.95 | 6.21  | -7.88  | 20.31 | 0.39 | 0.96 | Yes |
| Bacteria | Chlorobi      | Ignavibacteria        | Ignavibacteriales      | [Melioribacteraceae]    |              | 0.30% | -    | 0.86   | -17.70 | 19.41 | 0.93 | 1.00 | 3.38   | -14.73 | 21.50 | 0.71 | 1.00 | -8.40 | -20.32 | 3.52  | 0.17 | 0.95 | -6.61 | -18.17 | 4.95  | 0.26 | 0.96 | Yes |
| Bacteria | Chlorobi      | Ignavibacteria        | Ignavibacteriales      | Ignavibacteriaceae      |              | 1.60% | -    | 5.83   | -2.23  | 13.89 | 0.16 | 1.00 | 5.72   | -2.15  | 13.59 | 0.15 | 1.00 | 2.19  | -3.00  | 7.38  | 0.41 | 0.95 | 2.13  | -2.90  | 7.15  | 0.41 | 0.96 | Yes |
| Bacteria | Chlorobi      | OPB56                 |                        |                         |              | 1.50% | -    | -3.19  | -11.66 | 5.27  | 0.46 | 1.00 | -3.77  | -12.02 | 4.49  | 0.37 | 1.00 | -1.32 | -6.76  | 4.12  | 0.63 | 0.95 | -1.70 | -6.97  | 3.57  | 0.53 | 0.96 | Yes |
| Bacteria | Chlorobi      | SJA-28                |                        |                         |              | 1.60% | -    | -1.46  | -9.66  | 6.74  | 0.73 | 1.00 | -1.94  | -9.94  | 6.06  | 0.63 | 1.00 | -1.74 | -7.01  | 3.53  | 0.52 | 0.95 | -2.05 | -7.15  | 3.06  | 0.43 | 0.96 | Yes |
| Bacteria | Chloroflexi   | Anaerolineae          | A31                    |                         |              | 0.70% | -    | -11.83 | -23.94 | 0.29  | 0.06 | 0.99 | -12.60 | -24.42 | -0.79 | 0.04 | 1.00 | -5.34 | -13.13 | 2.46  | 0.18 | 0.95 | -5.87 | -13.42 | 1.68  | 0.13 | 0.96 | Yes |
| Bacteria | Chloroflexi   | Anaerolineae          | Anaerolineales         | Anaerolinaceae          | Longilinea   | 0.40% | -    | 0.68   | -15.41 | 16.78 | 0.93 | 1.00 | 0.04   | -15.67 | 15.74 | 1.00 | 1.00 | 3.74  | -6.61  | 14.08 | 0.48 | 0.95 | 3.31  | -6.71  | 13.33 | 0.52 | 0.96 | Yes |
| Bacteria | Chloroflexi   | Anaerolineae          | Anaerolineales         | Anaerolinaceae          | SHD-231      | 0.20% | -    | -2.67  | -25.33 | 19.98 | 0.82 | 1.00 | -3.33  | -25.43 | 18.78 | 0.77 | 1.00 | 1.64  | -12.92 | 16.21 | 0.82 | 0.96 | 1.17  | -12.94 | 15.28 | 0.87 | 0.98 | Yes |
| Bacteria | Chloroflexi   | Anaerolineae          | Anaerolineales         | Anaerolinaceae          | T78          | 0.20% | -    | -9.18  | -31.79 | 13.43 | 0.43 | 1.00 | -6.37  | -28.44 | 15.70 | 0.57 | 1.00 | -5.97 | -20.50 | 8.57  | 0.42 | 0.95 | -3.94 | -18.03 | 10.15 | 0.58 | 0.96 | Yes |
| Bacteria | Chloroflexi   | Anaerolineae          | Anaerolineales         | Anaerolinaceae          |              | 0.10% | -    | 12.41  | -19.53 | 44.34 | 0.45 | 1.00 | 10.49  | -20.67 | 41.65 | 0.51 | 1.00 | 17.03 | -3.47  | 37.54 | 0.10 | 0.95 | 15.73 | -4.14  | 35.61 | 0.12 | 0.96 | Yes |
| Bacteria | Chloroflexi   | Anaerolineae          | Ardenscatenales        | Ardenscatenaceae        | Ardenscatena | 0.20% | -    | -12.60 | -35.30 | 10.09 | 0.28 | 1.00 | -13.66 | -35.80 | 8.48  | 0.23 | 1.00 | -6.27 | -20.86 | 8.33  | 0.40 | 0.95 | -6.99 | -21.13 | 7.15  | 0.33 | 0.96 | Yes |
| Bacteria | Chloroflexi   | Anaerolineae          | Caldilineales          | Caldilineaceae          | Caldilinea   | 0.30% | -    | -14.51 | -33.07 | 4.05  | 0.13 | 1.00 | -16.46 | -34.57 | 1.66  | 0.07 | 1.00 | -4.96 | -16.90 | 6.99  | 0.42 | 0.95 | -6.31 | -17.88 | 5.26  | 0.28 | 0.96 | Yes |
| Bacteria | Chloroflexi   | Anaerolineae          | Caldilineales          | Caldilineaceae          |              | 1.69% | -    | -4.62  | -12.55 | 3.32  | 0.25 | 1.00 | -5.10  | -12.84 | 2.65  | 0.20 | 1.00 | -2.40 | -7.50  | 2.71  | 0.36 | 0.95 | -2.71 | -7.66  | 2.24  | 0.28 | 0.96 | Yes |
| Bacteria | Chloroflexi   | Anaerolineae          |                        |                         |              | 0.40% | -    | -2.33  | -18.49 | 13.83 | 0.78 | 1.00 | -4.27  | -20.05 | 11.50 | 0.60 | 1.00 | -2.51 | -12.90 | 7.88  | 0.63 | 0.95 | -3.89 | -13.96 | 6.18  | 0.45 | 0.96 | Yes |
| Bacteria | Chloroflexi   | Anaerolineae          | DRC31                  |                         |              | 0.90% | -    | -7.48  | -18.30 | 3.35  | 0.18 | 1.00 | -7.87  | -18.43 | 2.70  | 0.14 | 1.00 | -4.09 | -11.05 | 2.87  | 0.25 | 0.95 | -4.32 | -11.07 | 2.42  | 0.21 | 0.96 | Yes |
| Bacteria | Chloroflexi   | Anaerolineae          | envOPS12               |                         |              | 0.70% | -    | -2.25  | -14.54 | 10.03 | 0.72 | 1.00 | -3.33  | -15.33 | 8.66  | 0.59 | 1.00 | -2.04 | -9.94  | 5.86  | 0.61 | 0.95 | -2.78 | -10.43 | 4.88  | 0.48 | 0.96 | Yes |
| Bacteria | Chloroflexi   | Anaerolineae          | GCA004                 |                         |              | 0.20% | -    | -2.68  | -25.34 | 19.97 | 0.82 | 1.00 | -4.57  | -26.68 | 17.54 | 0.69 | 1.00 | 5.94  | -8.62  | 20.50 | 0.42 | 0.95 | 4.66  | -9.46  | 18.77 | 0.52 | 0.96 | Yes |
| Bacteria | Chloroflexi   | Anaerolineae          | H39                    |                         |              | 0.20% | -    | -12.60 | -35.30 | 10.09 | 0.28 | 1.00 | -13.66 | -35.80 | 8.48  | 0.23 | 1.00 | -6.27 | -20.86 | 8.33  | 0.40 | 0.95 | -6.99 | -21.13 | 7.15  | 0.33 | 0.96 | Yes |
| Bacteria | Chloroflexi   | Anaerolineae          | OPB11                  |                         |              | 0.10% | -    | 32.42  | 0.54   | 64.30 | 0.05 | 0.99 | 31.06  | -0.05  | 62.17 | 0.05 | 1.00 | 37.86 | 17.46  | 58.27 | 0.00 | 0.14 | 36.94 | 17.17  | 56.70 | 0.00 | 0.13 | Yes |
| Bacteria | Chloroflexi   | Anaerolineae          | S0208                  |                         |              | 0.30% | -    | -5.16  | -23.61 | 13.29 | 0.58 | 1.00 | -6.02  | -24.02 | 11.98 | 0.51 | 1.00 | -7.42 | -19.27 | 4.43  | 0.22 | 0.95 | -8.01 | -19.50 | 3.47  | 0.17 | 0.96 | Yes |
| Bacteria | Chloroflexi   | Anaerolineae          | SBR1031                | A4b                     |              | 1.79% | -    | 2.24   | -5.52  | 10.00 | 0.57 | 1.00 | 0.64   | -6.94  | 8.23  | 0.87 | 1.00 | 1.13  | -3.86  | 6.11  | 0.66 | 0.95 | 0.01  | -4.83  | 4.85  | 1.00 | 1.00 | Yes |
| Bacteria | Chloroflexi   | Anaerolineae          | SBR1031                | SHA-31                  |              | 0.10% | -    | -13.84 | -45.92 | 18.23 | 0.40 | 1.00 | -16.09 | -47.39 | 15.21 | 0.31 | 1.00 | -5.98 | -26.61 | 14.64 | 0.57 | 0.95 | -7.57 | -27.55 | 12.42 | 0.46 | 0.96 | Yes |
| Bacteria | Chloroflexi   | Anaerolineae          | SHA-20                 |                         |              | 0.10% | -    | 12.41  | -19.53 | 44.34 | 0.45 | 1.00 | 10.49  | -20.67 | 41.65 | 0.51 | 1.00 | 17.03 | -3.47  | 37.54 | 0.10 | 0.95 | 15.73 | -4.14  | 35.61 | 0.12 | 0.96 | Yes |
| Bacteria | Chloroflexi   | Anaerolineae          |                        |                         |              | 0.90% | -    | 1.49   | -9.32  | 12.30 | 0.79 | 1.00 | 1.77   | -8.77  | 12.32 | 0.74 | 1.00 | 4.37  | -2.57  | 11.32 | 0.22 | 0.95 | 4.59  | -2.13  | 11.32 | 0.18 | 0.96 | Yes |
| Bacteria | Chloroflexi   | C0119                 |                        |                         |              | 0.20% | -    | -0.23  | -22.88 | 22.42 | 0.98 | 1.00 | 0.36   | -21.74 | 22.46 | 0.97 | 1.00 | 2.96  | -11.60 | 17.52 | 0.69 | 0.95 | 3.41  | -10.70 | 17.51 | 0.64 | 0.96 | Yes |
| Bacteria | Chloroflexi   | Chloroflexi           | [Roseiflexales]        | [Roseiflexaceae]        | Roseiflexus  | 0.30% | -    | 4.85   | -13.68 | 23.37 | 0.61 | 1.00 | 0.77   | -17.34 | 18.89 | 0.93 | 1.00 | 3.84  | -8.07  | 15.75 | 0.53 | 0.95 | 0.93  | -10.63 | 12.49 | 0.87 | 0.98 | Yes |
| Bacteria | Chloroflexi   | Chloroflexi           | AKIW781                |                         |              | 0.20% | -    | -12.60 | -35.30 | 10.09 | 0.28 | 1.00 | -13.66 | -35.80 | 8.48  | 0.23 | 1.00 | -6.27 | -20.86 | 8.33  | 0.40 | 0.95 | -6.99 | -21.13 | 7.15  | 0.33 | 0.96 | Yes |
| Bacteria | Chloroflexi   | Chloroflexi           | Herpetosiphonales      |                         |              | 0.20% | -    | -12.60 | -35.30 | 10.09 | 0.28 | 1.00 | -13.66 | -35.80 | 8.48  | 0.23 | 1.00 | -6.27 | -20.86 | 8.33  | 0.40 | 0.95 | -6.99 | -21.13 | 7.15  | 0.33 | 0.96 | Yes |
| Bacteria | Chloroflexi   | Dehalococcoidetes     | Dehalococcoidales      | Dehalococcoidaceae      |              | 0.10% | -    | -7.70  | -39.68 | 24.29 | 0.64 | 1.00 | -4.16  | -35.38 | 27.07 | 0.79 | 1.00 | 1.73  | -18.83 | 22.29 | 0.87 | 0.96 | 4.28  | -15.65 | 24.21 | 0.67 | 0.96 | Yes |
| Bacteria | Chloroflexi   | Ellin6529             |                        |                         |              | 2.19% | -    | 3.21   | -3.70  | 10.11 | 0.36 | 1.00 | 2.72   | -4.02  | 9.46  | 0.43 | 1.00 | 2.26  | -2.18  | 6.70  | 0.32 | 0.95 | 1.92  | -2.38  | 6.23  | 0.38 | 0.96 | Yes |
| Bacteria | Chloroflexi   | Gitt-GS-136           |                        |                         |              | 1.10% | -    | -8.93  | -18.80 | 0.95  | 0.08 | 0.99 | -9.27  | -18.91 | 0.36  | 0.06 | 1.00 | -5.72 | -12.07 | 0.63  | 0.08 | 0.95 | -5.93 | -12.08 | 0.22  | 0.06 | 0.96 | Yes |
| Bacteria | Chloroflexi   | Ktedonobacteria       | Ktedonobacterales      | Ktedonobacteraceae      |              | 0.10% | -    | -6.03  | -38.01 | 25.96 | 0.71 | 1.00 | -5.08  | -36.29 | 26.13 | 0.75 | 1.00 | 1.52  | -19.04 | 22.08 | 0.88 | 0.97 | 2.23  | -17.70 | 22.15 | 0.83 | 0.97 | Yes |
| Bacteria | Chloroflexi   | Ktedonobacteria       | Thermogemmatissporales | Thermogemmatissporaceae |              | 0.10% | -    | -11.76 | -44.15 | 20.63 | 0.48 | 1.00 | -14.29 | -45.90 | 17.32 | 0.38 | 1.00 | -0.70 | -21.53 | 20.13 | 0.95 | 0.98 | -2.50 | -22.68 | 17.68 | 0.81 | 0.97 | Yes |
| Bacteria | Chloroflexi   | S085                  |                        |                         |              | 0.40% | -    | 1.94   | -14.13 | 18.00 | 0.81 | 1.00 | -1.84  | -17.55 | 13.87 | 0.82 | 1.00 | 0.46  | -9.87  | 10.79 | 0.93 | 0.98 | -2.22 | -12.25 | 7.80  | 0.66 | 0.96 | Yes |
| Bacteria | Chloroflexi   | Thermomicrobia        | AKYG1722               |                         |              | 0.20% | -    | -12.60 | -35.30 | 10.09 | 0.28 | 1.00 | -13.66 | -35.80 | 8.48  | 0.23 | 1.00 | -6.27 | -20.86 | 8.33  | 0.40 | 0.95 | -6.99 | -21.13 | 7.15  | 0.33 | 0.96 | Yes |
| Bacteria | Chloroflexi   | Thermomicrobia        | JG30-KF-CM45           |                         |              | 3.59% | -    | 1.83   | -3.62  | 7.29  | 0.51 | 1.00 | 1.32   | -4.01  | 6.65  | 0.63 | 1.00 | 1.85  | -1.65  | 5.36  | 0.30 | 0.95 | 1.49  | -1.91  | 4.89  | 0.39 | 0.96 | Yes |
| Bacteria | Chloroflexi   | TK10                  | AKYG885                | 5B-12                   |              | 0.20% | -    | 8.23   | -14.48 | 30.94 | 0.48 | 1.00 | 4.04   | -18.15 | 26.24 | 0.72 | 1.00 | 5.04  | -9.56  | 19.64 | 0.50 | 0.95 | 2.06  | -12.10 | 16.23 | 0.77 | 0.97 | Yes |
| Bacteria | Chloroflexi   | TK10                  | AKYG885                | Dolo_23                 |              | 0.50% | -    | -5.33  | -19.84 | 9.17  | 0.47 | 1.00 | -4.94  | -19.09 | 9.21  | 0.49 | 1.00 | 1.95  | -7.38  | 11.27 | 0.68 | 0.95 | 2.26  | -6.77  | 11.29 | 0.62 | 0.96 | Yes |
| Bacteria | Chloroflexi   | TK10                  | B07_WMSP1              |                         |              | 0.20% | -    | 26.63  | 4.05   | 49.20 | 0.02 | 0.99 | 23.26  | 1.21   | 45.32 | 0.04 | 1.00 | 16.85 | 2.34   | 31.37 | 0.02 | 0.95 | 14.46 | 0.38   | 28.55 | 0.04 | 0.96 | Yes |
| Bacteria | Chloroflexi   | TK17                  | mle1-48                |                         |              | 0.70% | -    | -8.64  | -20.88 | 3.61  | 0.17 | 1.00 | -9.15  | -21.10 | 2.80  | 0.13 | 1.00 | -7.12 | -14.99 | 0.74  | 0.08 | 0.95 | -7.44 | -15.06 | 0.18  | 0.06 | 0.96 | Yes |
| Bacteria | Chloroflexi   |                       |                        |                         |              | 0.20% | -    | -12.60 | -35.30 | 10.09 | 0.28 | 1.00 | -13.66 | -35.80 | 8.48  | 0.23 | 1.00 | -6.27 | -20.86 | 8.33  | 0.40 | 0.95 | -6.99 | -21.13 | 7.15  | 0.33 | 0.96 | Yes |
| Bacteria | Cyanobacteria | 4C0d-2                | MLE1-12                |                         |              | 0.70% | -    | -3.48  | -15.65 | 8.69  | 0.58 | 1.00 | -2.52  | -14.40 | 9.35  | 0.68 | 1.00 | 0.54  | -7.29  | 8.36  | 0.89 | 0.97 | 1.26  | -6.32  | 8.84  | 0.74 | 0.97 | Yes |
| Bacteria | Cyanobacteria | 4C0d-2                | SM1D11                 |                         |              | 0.20% | -    | -14.99 | -37.84 | 7.86  | 0.20 | 1.00 | -19.50 | -41.81 | 2.82  | 0.09 | 1.00 | -5.31 | -20.01 | 9.38  | 0.48 | 0.95 | -8.50 | -22.76 | 5.75  | 0.24 | 0.96 | Yes |
| Bacteria | Cyanobacteria | 4C0d-2                | YS2                    |                         |              | 0.39  | 0.60 | -0.23  | -2.04  | 1.58  | 0.81 | 1.00 | -0.17  | -1.94  | 1.61  | 0.85 | 1.00 | 0.33  | -0.83  | 1.49  | 0.58 | 0.95 | 0.33  | -0.80  | 1.47  | 0.56 | 0.96 | No  |
| Bacteria | Cyanobacteria | Chloroplast           | Chlorophyta            | Trebouxiophyceae        | Coccomyxa    | 0.50% | -    | 0.66   | -13.78 | 15.09 | 0.93 | 1.00 | 1.73   | -12.36 | 15.81 | 0.81 | 1.00 | -1.29 | -10.56 | 7.99  | 0.79 | 0.96 | -0.52 | -9.51  | 8.47  | 0.91 | 0.99 | Yes |
| Bacteria | Cyanobacteria | Chloroplast           | Chlorophyta            |                         |              | 0.10% | -    | -9.63  | -41.60 | 22.34 | 0.55 | 1.00 | -12.56 | -43.76 | 18.63 | 0.43 | 1.00 | -2.27 | -22.82 | 18.29 | 0.83 | 0.96 | -4.34 | -24.26 | 15.58 | 0.67 | 0.96 | Yes |
| Bacteria | Cyanobacteria | Chloroplast           | Streptophyta           |                         |              | 0.34  | 0.47 | 0.20   | -1.96  | 2.36  | 0.86 | 1.00 | 0.18   | -1.93  | 2.29  | 0.86 | 1.00 | -0.06 | -1.45  | 1.33  | 0.93 | 0.98 | -0.05 | -1.40  | 1.30  | 0.94 | 0.99 | No  |
| Bacteria | Cyanobacteria | ML635J-21             |                        |                         |              | 0.10% | -    | 12.41  | -19.53 | 44.34 | 0.45 | 1.00 | 10.49  | -20.67 | 41.65 | 0.51 | 1.00 | 17.03 | -3.47  | 37.54 | 0.10 | 0.95 | 15.73 | -4.14  | 35.61 | 0.12 | 0.96 | Yes |
| Bacteria | Cyanobacteria | Oscillatoriophycideae | Chroococcales          | Xenococcaceae           |              | 0.10% | -    | -13.84 | -45.92 | 18.23 | 0.40 | 1.00 | -      |        |       |      |      |       |        |       |      |      |       |        |       |      |      |     |

|          |            |         |                 |                        |                     |        |      |        |        |       |      |      |        |        |       |      |      |        |        |       |      |      |       |        |       |      |      |     |
|----------|------------|---------|-----------------|------------------------|---------------------|--------|------|--------|--------|-------|------|------|--------|--------|-------|------|------|--------|--------|-------|------|------|-------|--------|-------|------|------|-----|
| Bacteria | Firmicutes | Bacilli | Bacillales      | Other                  | Other               | 0.34   | 0.41 | -2.65  | -5.13  | -0.17 | 0.04 | 0.99 | -2.46  | -4.89  | -0.04 | 0.05 | 1.00 | -0.91  | -2.51  | 0.69  | 0.26 | 0.95 | -0.79 | -2.34  | 0.76  | 0.32 | 0.96 | No  |
| Bacteria | Firmicutes | Bacilli | Bacillales      | Paenibacillaceae       | Ammoniphilus        | 0.30%  | -    | -7.41  | -25.95 | 11.14 | 0.43 | 1.00 | -7.31  | -25.41 | 10.78 | 0.43 | 1.00 | -2.50  | -14.42 | 9.43  | 0.68 | 0.95 | -2.39 | -13.95 | 9.16  | 0.68 | 0.96 | Yes |
| Bacteria | Firmicutes | Bacilli | Bacillales      | Paenibacillaceae       | Aneurinibacillus    | 0.50%  | -    | 17.53  | 3.26   | 31.79 | 0.02 | 0.99 | 16.09  | 2.16   | 30.02 | 0.02 | 1.00 | 3.19   | -6.01  | 12.38 | 0.50 | 0.95 | 2.16  | -6.75  | 11.07 | 0.63 | 0.96 | Yes |
| Bacteria | Firmicutes | Bacilli | Bacillales      | Paenibacillaceae       | Brevibacillus       | 2.59%  | -    | -1.05  | -7.56  | 5.45  | 0.75 | 1.00 | -1.61  | -7.95  | 4.74  | 0.62 | 1.00 | 1.75   | -2.43  | 5.93  | 0.41 | 0.95 | 1.37  | -2.68  | 5.42  | 0.51 | 0.96 | Yes |
| Bacteria | Firmicutes | Bacilli | Bacillales      | Paenibacillaceae       | Cohnella            | 0.10%  | -    | -2.95  | -35.22 | 29.31 | 0.86 | 1.00 | 3.52   | -28.01 | 35.04 | 0.83 | 1.00 | -13.88 | -34.61 | 6.84  | 0.19 | 0.95 | -9.27 | -29.39 | 10.85 | 0.37 | 0.96 | Yes |
| Bacteria | Firmicutes | Bacilli | Bacillales      | Paenibacillaceae       | Other               | 0.70%  | -    | 5.18   | -6.97  | 17.32 | 0.40 | 1.00 | 5.49   | -6.36  | 17.34 | 0.36 | 1.00 | -1.40  | -9.21  | 6.41  | 0.73 | 0.96 | -1.17 | -8.73  | 6.40  | 0.76 | 0.97 | Yes |
| Bacteria | Firmicutes | Bacilli | Bacillales      | Paenibacillaceae       | Paenibacillus       | 5.58%  | -    | -0.01  | -4.46  | 4.43  | 1.00 | 1.00 | -0.71  | -5.05  | 3.63  | 0.75 | 1.00 | 0.51   | -2.34  | 3.37  | 0.73 | 0.96 | 0.03  | -2.74  | 2.80  | 0.98 | 1.00 | Yes |
| Bacteria | Firmicutes | Bacilli | Bacillales      | Paenibacillaceae       | Paenibacillus       | 1.79%  | -    | 3.54   | -4.10  | 11.19 | 0.36 | 1.00 | 3.42   | -4.04  | 10.88 | 0.37 | 1.00 | 1.41   | -3.51  | 6.32  | 0.57 | 0.95 | 1.34  | -3.42  | 6.10  | 0.58 | 0.96 | Yes |
| Bacteria | Firmicutes | Bacilli | Bacillales      | Planococcaceae         | Lysinibacillus      | 0.90%  | -    | -1.41  | -12.16 | 9.34  | 0.80 | 1.00 | 0.17   | -10.33 | 10.67 | 0.97 | 1.00 | -1.50  | -8.42  | 5.41  | 0.67 | 0.95 | -0.38 | -7.09  | 6.32  | 0.91 | 0.99 | Yes |
| Bacteria | Firmicutes | Bacilli | Bacillales      | Planococcaceae         | Other               | 6.68%  | -    | 1.45   | -2.59  | 5.50  | 0.48 | 1.00 | 1.63   | -2.32  | 5.58  | 0.42 | 1.00 | -0.74  | -3.34  | 1.86  | 0.58 | 0.95 | -0.61 | -3.13  | 1.92  | 0.64 | 0.96 | Yes |
| Bacteria | Firmicutes | Bacilli | Bacillales      | Planococcaceae         | Planomicrobium      | 1.89%  | -    | 1.16   | -6.27  | 8.59  | 0.76 | 1.00 | 1.61   | -5.63  | 8.86  | 0.66 | 1.00 | 5.11   | 0.35   | 9.88  | 0.04 | 0.95 | 5.46  | 0.84   | 10.07 | 0.02 | 0.96 | Yes |
| Bacteria | Firmicutes | Bacilli | Bacillales      | Planococcaceae         | Rummeliibacillus    | 0.90%  | -    | -4.94  | -15.68 | 5.80  | 0.37 | 1.00 | -3.67  | -14.16 | 6.81  | 0.49 | 1.00 | -2.55  | -9.45  | 4.35  | 0.47 | 0.95 | -1.65 | -8.34  | 5.05  | 0.63 | 0.96 | Yes |
| Bacteria | Firmicutes | Bacilli | Bacillales      | Planococcaceae         | Solibacillus        | 0.30%  | -    | -5.60  | -24.21 | 13.02 | 0.56 | 1.00 | -8.22  | -26.40 | 9.95  | 0.37 | 1.00 | -2.64  | -14.61 | 9.33  | 0.67 | 0.95 | -4.53 | -16.13 | 7.07  | 0.44 | 0.96 | Yes |
| Bacteria | Firmicutes | Bacilli | Bacillales      | Planococcaceae         | Sporosarcina        | 2.59%  | -    | -3.62  | -10.02 | 2.77  | 0.27 | 1.00 | -2.16  | -8.41  | 4.10  | 0.50 | 1.00 | -3.79  | -7.90  | 0.32  | 0.07 | 0.95 | -2.74 | -6.73  | 1.25  | 0.18 | 0.96 | Yes |
| Bacteria | Firmicutes | Bacilli | Bacillales      | Planococcaceae         | Other               | 4.79%  | -    | -2.91  | -7.68  | 1.85  | 0.23 | 1.00 | -2.85  | -7.55  | 1.85  | 0.23 | 1.00 | -2.24  | -5.31  | 0.82  | 0.15 | 0.95 | -2.37 | -5.37  | 0.63  | 0.12 | 0.96 | Yes |
| Bacteria | Firmicutes | Bacilli | Bacillales      | Sporolactobacillaceae  | Other               | 0.90%  | -    | -3.91  | -14.60 | 6.79  | 0.47 | 1.00 | -2.71  | -13.16 | 7.73  | 0.61 | 1.00 | -0.29  | -7.17  | 6.59  | 0.93 | 0.98 | 0.58  | -6.09  | 7.25  | 0.86 | 0.98 | Yes |
| Bacteria | Firmicutes | Bacilli | Bacillales      | Sporolactobacillaceae  | Sporolactobacillus  | 0.10%  | -    | -13.54 | -45.60 | 18.53 | 0.41 | 1.00 | -8.79  | -40.12 | 22.53 | 0.58 | 1.00 | -4.30  | -24.92 | 16.32 | 0.68 | 0.95 | -0.84 | -20.84 | 19.16 | 0.93 | 0.99 | Yes |
| Bacteria | Firmicutes | Bacilli | Bacillales      | Staphylococcaceae      | Jeotgalicoccus      | 9.97%  | -    | -3.46  | -6.86  | -0.05 | 0.05 | 0.99 | -2.87  | -6.20  | 0.46  | 0.09 | 1.00 | -1.62  | -3.81  | 0.57  | 0.15 | 0.95 | -1.19 | -3.32  | 0.93  | 0.27 | 0.96 | Yes |
| Bacteria | Firmicutes | Bacilli | Bacillales      | Staphylococcaceae      | Macrococcus         | 17.35% | -    | -1.96  | -4.65  | 0.73  | 0.15 | 1.00 | -2.17  | -4.80  | 0.47  | 0.11 | 1.00 | 0.21   | -1.52  | 1.94  | 0.81 | 0.96 | 0.03  | -1.65  | 1.71  | 0.97 | 0.99 | Yes |
| Bacteria | Firmicutes | Bacilli | Bacillales      | Staphylococcaceae      | Other               | 0.40%  | -    | -13.75 | -29.81 | 2.32  | 0.09 | 1.00 | -13.73 | -29.41 | 1.94  | 0.09 | 1.00 | -5.56  | -15.90 | 4.78  | 0.29 | 0.95 | -5.52 | -15.54 | 4.49  | 0.28 | 0.96 | Yes |
| Bacteria | Firmicutes | Bacilli | Bacillales      | Staphylococcaceae      | Salinicoccus        | 5.48%  | -    | -0.42  | -4.87  | 4.03  | 0.85 | 1.00 | 1.12   | -3.24  | 5.49  | 0.61 | 1.00 | -1.83  | -4.69  | 1.03  | 0.21 | 0.95 | -0.74 | -3.52  | 2.05  | 0.60 | 0.96 | Yes |
| Bacteria | Firmicutes | Bacilli | Bacillales      | Staphylococcaceae      | Staphylococcus      | 16.05% | -    | 0.60   | -2.18  | 3.37  | 0.67 | 1.00 | 0.93   | -1.78  | 3.64  | 0.50 | 1.00 | 0.08   | -1.70  | 1.87  | 0.93 | 0.98 | 0.34  | -1.39  | 2.07  | 0.70 | 0.97 | Yes |
| Bacteria | Firmicutes | Bacilli | Bacillales      | Thermoactinomycetaceae | Planifilum          | 1.00%  | -    | -1.01  | -11.22 | 9.19  | 0.85 | 1.00 | -0.38  | -10.34 | 9.58  | 0.94 | 1.00 | -0.80  | -7.36  | 5.76  | 0.81 | 0.96 | -0.34 | -6.69  | 6.02  | 0.92 | 0.99 | Yes |
| Bacteria | Firmicutes | Bacilli | Bacillales      | Thermoactinomycetaceae | Other               | 0.40%  | -    | -2.86  | -19.05 | 13.32 | 0.73 | 1.00 | -4.91  | -20.71 | 10.89 | 0.54 | 1.00 | 0.20   | -10.21 | 10.60 | 0.97 | 0.99 | -1.24 | -11.33 | 8.85  | 0.81 | 0.97 | Yes |
| Bacteria | Firmicutes | Bacilli | Bacillales      |                        |                     | 0.18   | 0.30 | 0.21   | -3.14  | 3.55  | 0.90 | 1.00 | 0.30   | -2.97  | 3.56  | 0.86 | 1.00 | -0.19  | -2.35  | 1.96  | 0.86 | 0.96 | -0.16 | -2.25  | 1.93  | 0.88 | 0.98 | No  |
| Bacteria | Firmicutes | Bacilli | Gemellales      | Gemellaceae            | Gemella             | 7.18%  | -    | 0.29   | -3.63  | 4.21  | 0.88 | 1.00 | 0.13   | -3.70  | 3.95  | 0.95 | 1.00 | 1.30   | -1.21  | 3.82  | 0.31 | 0.95 | 1.19  | -1.24  | 3.63  | 0.34 | 0.96 | Yes |
| Bacteria | Firmicutes | Bacilli | Gemellales      | Gemellaceae            | Other               | 0.50%  | -    | -9.81  | -24.10 | 4.49  | 0.18 | 1.00 | -9.23  | -23.18 | 4.72  | 0.19 | 1.00 | -3.10  | -12.30 | 6.09  | 0.51 | 0.95 | -2.67 | -11.58 | 6.24  | 0.56 | 0.96 | Yes |
| Bacteria | Firmicutes | Bacilli | Gemellales      | Gemellaceae            |                     | 1.04   | 0.31 | 2.05   | -1.29  | 5.38  | 0.23 | 1.00 | 1.83   | -1.43  | 5.08  | 0.27 | 1.00 | 1.64   | -0.50  | 3.79  | 0.13 | 0.95 | 1.46  | -0.62  | 3.54  | 0.17 | 0.96 | No  |
| Bacteria | Firmicutes | Bacilli | Haloplasmatales | Haloplasmataceae       |                     | 0.20%  | -    | 25.07  | 2.48   | 47.65 | 0.03 | 0.99 | 22.67  | 0.62   | 44.73 | 0.04 | 1.00 | 3.65   | -10.91 | 18.20 | 0.62 | 0.95 | 1.94  | -12.16 | 16.05 | 0.79 | 0.97 | Yes |
| Bacteria | Firmicutes | Bacilli | Lactobacillales | Aerococcaceae          | Aerococcus          | 4.49%  | -    | 3.06   | -1.85  | 7.97  | 0.22 | 1.00 | 3.54   | -1.25  | 8.33  | 0.15 | 1.00 | 0.09   | -3.07  | 3.25  | 0.95 | 0.98 | 0.45  | -2.61  | 3.51  | 0.77 | 0.97 | Yes |
| Bacteria | Firmicutes | Bacilli | Lactobacillales | Aerococcaceae          | Alkalibacterium     | 0.40%  | -    | -12.97 | -28.99 | 3.05  | 0.11 | 1.00 | -14.76 | -30.40 | 0.87  | 0.06 | 1.00 | -6.85  | -17.15 | 3.46  | 0.19 | 0.95 | -8.12 | -18.11 | 1.86  | 0.11 | 0.96 | Yes |
| Bacteria | Firmicutes | Bacilli | Lactobacillales | Aerococcaceae          | Alloiooccus         | 3.89%  | -    | -1.35  | -6.63  | 3.92  | 0.61 | 1.00 | -0.54  | -5.69  | 4.61  | 0.84 | 1.00 | 0.60   | -2.79  | 3.99  | 0.73 | 0.96 | 1.19  | -2.10  | 4.47  | 0.48 | 0.96 | Yes |
| Bacteria | Firmicutes | Bacilli | Lactobacillales | Aerococcaceae          | Facklamia           | 11.86% | -    | -1.61  | -4.75  | 1.53  | 0.32 | 1.00 | -0.86  | -3.93  | 2.22  | 0.58 | 1.00 | -1.39  | -3.41  | 0.63  | 0.18 | 0.95 | -0.85 | -2.81  | 1.12  | 0.40 | 0.96 | Yes |
| Bacteria | Firmicutes | Bacilli | Lactobacillales | Aerococcaceae          | Marinilactibacillus | 0.90%  | -    | -1.44  | -12.17 | 9.28  | 0.79 | 1.00 | -0.33  | -10.80 | 10.14 | 0.95 | 1.00 | -2.92  | -9.82  | 3.97  | 0.41 | 0.95 | -2.12 | -8.80  | 4.56  | 0.53 | 0.96 | Yes |
| Bacteria | Firmicutes | Bacilli | Lactobacillales | Aerococcaceae          | Other               | 0.27   | 0.30 | 1.45   | -1.98  | 4.88  | 0.41 | 1.00 | 1.32   | -2.03  | 4.67  | 0.44 | 1.00 | 1.15   | -1.05  | 3.36  | 0.30 | 0.95 | 1.05  | -1.08  | 3.19  | 0.33 | 0.96 | No  |
| Bacteria | Firmicutes | Bacilli | Lactobacillales | Aerococcaceae          | Other               | 9.87%  | -    | -4.01  | -7.48  | -0.55 | 0.02 | 0.99 | -2.99  | -6.39  | 0.41  | 0.08 | 1.00 | -1.23  | -3.46  | 1.01  | 0.28 | 0.95 | -0.47 | -2.64  | 1.70  | 0.67 | 0.96 | Yes |
| Bacteria | Firmicutes | Bacilli | Lactobacillales | Carnobacteriaceae      | Carnobacterium      | 0.80%  | -    | -1.70  | -13.04 | 9.64  | 0.77 | 1.00 | -4.03  | -15.11 | 7.05  | 0.48 | 1.00 | 1.09   | -6.20  | 8.38  | 0.77 | 0.96 | -0.55 | -7.63  | 6.52  | 0.88 | 0.98 | Yes |
| Bacteria | Firmicutes | Bacilli | Lactobacillales | Carnobacteriaceae      | Granulicatella      | 0.15   | 0.21 | 4.58   | -0.34  | 9.50  | 0.07 | 0.99 | 3.41   | -1.40  | 8.23  | 0.16 | 1.00 | 1.35   | -1.81  | 4.52  | 0.40 | 0.95 | 0.52  | -2.55  | 3.60  | 0.74 | 0.97 | No  |
| Bacteria | Firmicutes | Bacilli | Lactobacillales | Carnobacteriaceae      | Other               | 0.10%  | -    | -4.21  | -36.21 | 27.79 | 0.80 | 1.00 | -5.67  | -36.90 | 25.55 | 0.72 | 1.00 | -1.52  | -22.09 | 19.05 | 0.88 | 0.97 | -2.52 | -22.45 | 17.42 | 0.80 | 0.97 | Yes |
| Bacteria | Firmicutes | Bacilli | Lactobacillales | Enterococcaceae        | Enterococcus        | 0.30   | 0.34 | -0.83  | -3.80  | 2.15  | 0.59 | 1.00 | -1.28  | -4.18  | 1.62  | 0.39 | 1.00 | -1.04  | -2.95  | 0.88  | 0.29 | 0.95 | -1.37 | -3.22  | 0.49  | 0.15 | 0.96 | No  |
| Bacteria | Firmicutes | Bacilli | Lactobacillales | Enterococcaceae        | Other               | 6.38%  | -    | 0.79   | -3.34  | 4.92  | 0.71 | 1.00 | 0.90   | -3.13  | 4.94  | 0.66 | 1.00 | -0.55  | -3.21  | 2.10  | 0.68 | 0.95 | -0.46 | -3.03  | 2.12  | 0.73 | 0.97 | Yes |
| Bacteria | Firmicutes | Bacilli | Lactobacillales | Enterococcaceae        | Vagococcus          | 3.49%  | -    | 0.11   | -5.42  | 5.65  | 0.97 | 1.00 | 0.22   | -5.26  | 5.70  | 0.94 | 1.00 | 1.48   | -2.08  | 5.04  | 0.41 | 0.95 | 1.37  | -2.13  | 4.86  | 0.44 | 0.96 | Yes |
| Bacteria | Firmicutes | Bacilli | Lactobacillales | Enterococcaceae        | Other               | 2.29%  | -    | -1.35  | -8.14  | 5.45  | 0.70 | 1.00 | -0.67  | -7.30  | 5.97  | 0.84 | 1.00 | -2.07  | -6.44  | 2.29  | 0.35 | 0.95 | -1.58 | -5.81  | 2.65  | 0.46 | 0.96 | Yes |
| Bacteria | Firmicutes | Bacilli | Lactobacillales | Lactobacillaceae       | Lactobacillus*      | 2.08   | 0.60 | 1.67   | -0.07  | 3.40  | 0.06 | 0.99 | 1.61   | -0.08  | 3.30  | 0.06 | 1.00 | 1.18   | 0.07   | 2.29  | 0.04 | 0.95 | 1.13  | 0.05   | 2.21  | 0.04 | 0.96 | No  |
| Bacteria | Firmicutes | Bacilli | Lactobacillales | Lactobacillaceae       | Other               | 2.79%  | -    | -1.38  | -7.48  | 4.72  | 0.66 | 1.00 | -0.88  | -6.83  | 5.07  | 0.77 | 1.00 | -1.94  | -5.86  | 1.98  | 0.33 | 0.95 | -1.58 | -5.38  | 2.22  | 0.42 | 0.96 | Yes |
| Bacteria | Firmicutes | Bacilli | Lactobacillales | Lactobacillaceae       | Pediococcus         | 14.76% | -    | 0.25   | -2.61  | 3.11  | 0.86 | 1.00 | 0.06   | -2.73  | 2.86  | 0.97 | 1.00 | 0.33   | -1.51  | 2.17  | 0.73 | 0.96 | 0.21  | -1.58  | 1.99  | 0.82 | 0.97 | Yes |
| Bacteria | Firmicutes | Bacilli | Lactobacillales | Lactobacillaceae       | Other               | 0.33   | 0.48 | -0.87  | -2.96  | 1.23  | 0.42 | 1.00 | -0.67  | -2.72  | 1.38  | 0.52 | 1.00 | 0.26   | -1.08  | 1.61  | 0.70 | 0.95 | 0.40  | -0.90  | 1.71  | 0.54 | 0.96 | No  |
| Bacteria | Firmicutes | Bacilli | Lactobacillales | Leuconostocaceae       | Fructobacillus      | 0.50%  | -    | -3.38  | -17.71 | 10.94 | 0.64 | 1.00 | -2.49  | -16.47 | 11.48 | 0.73 | 1.00 | -1.74  | -10.95 | 7.46  | 0.71 | 0.95 | -1.11 | -10.03 | 7.82  | 0.81 | 0.97 | Yes |
| Bacteria | Firmicutes | Bacilli | Lactobacillales | Leuconostocaceae       | Leuconostoc         | 0.55   |      |        |        |       |      |      |        |        |       |      |      |        |        |       |      |      |       |        |       |      |      |     |

|          |            |            |               |                     |                              |        |      |        |        |       |      |      |        |        |       |      |      |        |        |       |      |      |       |        |       |      |      |     |
|----------|------------|------------|---------------|---------------------|------------------------------|--------|------|--------|--------|-------|------|------|--------|--------|-------|------|------|--------|--------|-------|------|------|-------|--------|-------|------|------|-----|
| Bacteria | Firmicutes | Clostridia | Clostridiales | [Tissierellaceae]   | ph2                          | 11.76% | -    | 1.62   | -1.52  | 4.76  | 0.31 | 1.00 | 2.23   | -0.84  | 5.30  | 0.15 | 1.00 | 1.27   | -0.75  | 3.28  | 0.22 | 0.95 | 1.71  | -0.25  | 3.67  | 0.09 | 0.96 | Yes |
| Bacteria | Firmicutes | Clostridia | Clostridiales | [Tissierellaceae]   | Sedimentibacter              | 0.30%  | -    | 8.80   | -9.77  | 27.37 | 0.35 | 1.00 | 8.57   | -9.54  | 26.69 | 0.35 | 1.00 | 4.73   | -7.21  | 16.67 | 0.44 | 0.95 | 4.56  | -7.01  | 16.12 | 0.44 | 0.96 | Yes |
| Bacteria | Firmicutes | Clostridia | Clostridiales | [Tissierellaceae]   | Tissierella_Soehngenia       | 2.09%  | -    | 0.65   | -6.43  | 7.74  | 0.86 | 1.00 | 0.84   | -6.08  | 7.75  | 0.81 | 1.00 | 1.10   | -3.46  | 5.65  | 0.64 | 0.95 | 1.23  | -3.18  | 5.65  | 0.58 | 0.96 | Yes |
| Bacteria | Firmicutes | Clostridia | Clostridiales | [Tissierellaceae]   | WAL_1855D                    | 0.25   | 0.38 | 0.65   | -2.14  | 3.45  | 0.65 | 1.00 | 0.73   | -1.99  | 3.46  | 0.60 | 1.00 | 0.87   | -0.93  | 2.66  | 0.34 | 0.95 | 0.94  | -0.80  | 2.68  | 0.29 | 0.96 | No  |
| Bacteria | Firmicutes | Clostridia | Clostridiales | [Tissierellaceae]   |                              | 4.59%  | -    | -4.71  | -9.59  | 0.17  | 0.06 | 0.99 | -3.85  | -8.62  | 0.93  | 0.11 | 1.00 | -2.35  | -5.49  | 0.79  | 0.14 | 0.95 | -1.71 | -4.76  | 1.33  | 0.27 | 0.96 | Yes |
| Bacteria | Firmicutes | Clostridia | Clostridiales | [Tissierellaceae]   |                              | 17.35% | -    | 2.76   | 0.07   | 5.44  | 0.04 | 0.99 | 2.52   | -0.10  | 5.14  | 0.06 | 1.00 | 2.36   | 0.64   | 4.08  | 0.01 | 0.95 | 2.20  | 0.53   | 3.87  | 0.01 | 0.96 | Yes |
| Bacteria | Firmicutes | Clostridia | Clostridiales | Christensenellaceae | Christensenella              | 0.12   | 0.20 | 0.21   | -4.96  | 5.38  | 0.94 | 1.00 | 0.31   | -4.74  | 5.35  | 0.91 | 1.00 | 1.49   | -1.83  | 4.81  | 0.38 | 0.95 | 1.54  | -1.68  | 4.76  | 0.35 | 0.96 | No  |
| Bacteria | Firmicutes | Clostridia | Clostridiales | Christensenellaceae |                              | 0.45   | 0.45 | 1.06   | -1.26  | 3.38  | 0.37 | 1.00 | 1.21   | -1.06  | 3.47  | 0.30 | 1.00 | 0.42   | -1.07  | 1.92  | 0.58 | 0.95 | 0.54  | -0.90  | 1.99  | 0.46 | 0.96 | No  |
| Bacteria | Firmicutes | Clostridia | Clostridiales | Clostridiaceae      | Alkaliphilus                 | 0.70%  | -    | -7.62  | -19.80 | 4.56  | 0.22 | 1.00 | -4.58  | -16.50 | 7.34  | 0.45 | 1.00 | -0.49  | -8.32  | 7.35  | 0.90 | 0.97 | 1.72  | -5.90  | 9.33  | 0.66 | 0.96 | Yes |
| Bacteria | Firmicutes | Clostridia | Clostridiales | Clostridiaceae      | Caloramator                  | 0.40%  | -    | -1.52  | -17.72 | 14.67 | 0.85 | 1.00 | 1.12   | -14.69 | 16.94 | 0.89 | 1.00 | -1.27  | -11.68 | 9.14  | 0.81 | 0.96 | 0.62  | -9.48  | 10.72 | 0.90 | 0.99 | Yes |
| Bacteria | Firmicutes | Clostridia | Clostridiales | Clostridiaceae      | Candidatus Arthromitus       | 2.79%  | -    | 0.16   | -6.02  | 6.35  | 0.96 | 1.00 | -0.15  | -6.18  | 5.89  | 0.96 | 1.00 | -1.78  | -5.75  | 2.20  | 0.38 | 0.95 | -1.98 | -5.83  | 1.87  | 0.31 | 0.96 | Yes |
| Bacteria | Firmicutes | Clostridia | Clostridiales | Clostridiaceae      | Clostridiisalibacter         | 0.10%  | -    | -15.38 | -47.34 | 16.58 | 0.35 | 1.00 | -12.43 | -43.62 | 18.77 | 0.43 | 1.00 | -5.29  | -25.85 | 15.26 | 0.61 | 0.95 | -3.16 | -23.08 | 16.76 | 0.76 | 0.97 | Yes |
| Bacteria | Firmicutes | Clostridia | Clostridiales | Clostridiaceae      | Clostridium                  | 1.80   | 0.51 | 0.27   | -1.77  | 2.30  | 0.80 | 1.00 | -0.19  | -2.18  | 1.80  | 0.85 | 1.00 | 0.49   | -0.82  | 1.80  | 0.46 | 0.95 | 0.19  | -1.08  | 1.46  | 0.77 | 0.97 | No  |
| Bacteria | Firmicutes | Clostridia | Clostridiales | Clostridiaceae      | Other                        | 1.08   | 0.40 | 0.01   | -2.59  | 2.61  | 0.99 | 1.00 | 0.13   | -2.41  | 2.67  | 0.92 | 1.00 | 0.14   | -1.54  | 1.81  | 0.87 | 0.96 | 0.23  | -1.39  | 1.85  | 0.78 | 0.97 | No  |
| Bacteria | Firmicutes | Clostridia | Clostridiales | Clostridiaceae      | Proteiniclasticum            | 0.90%  | -    | -4.41  | -15.19 | 6.38  | 0.42 | 1.00 | -4.11  | -14.63 | 6.41  | 0.44 | 1.00 | -3.13  | -10.06 | 3.80  | 0.38 | 0.95 | -2.92 | -9.63  | 3.80  | 0.39 | 0.96 | Yes |
| Bacteria | Firmicutes | Clostridia | Clostridiales | Clostridiaceae      | Sarcina                      | 4.99%  | -    | -0.89  | -5.59  | 3.80  | 0.71 | 1.00 | -1.00  | -5.58  | 3.57  | 0.67 | 1.00 | -1.22  | -4.24  | 1.79  | 0.43 | 0.95 | -1.28 | -4.20  | 1.64  | 0.39 | 0.96 | Yes |
| Bacteria | Firmicutes | Clostridia | Clostridiales | Clostridiaceae      | SMB53                        | 1.08   | 0.35 | 1.63   | -1.29  | 4.56  | 0.27 | 1.00 | 1.83   | -1.03  | 4.68  | 0.21 | 1.00 | 1.75   | -0.13  | 3.63  | 0.07 | 0.95 | 1.91  | 0.09   | 3.73  | 0.04 | 0.96 | No  |
| Bacteria | Firmicutes | Clostridia | Clostridiales | Clostridiaceae      | Tindallia_Anoxynatronum      | 0.20%  | -    | 5.27   | -17.29 | 27.84 | 0.65 | 1.00 | 8.93   | -13.11 | 30.96 | 0.43 | 1.00 | -1.59  | -16.10 | 12.91 | 0.83 | 0.96 | 1.03  | -13.03 | 15.10 | 0.89 | 0.99 | Yes |
| Bacteria | Firmicutes | Clostridia | Clostridiales | Clostridiaceae      |                              | 3.15   | 0.32 | 3.19   | -0.07  | 6.46  | 0.06 | 0.99 | 3.35   | 0.16   | 6.53  | 0.04 | 1.00 | 1.60   | -0.50  | 3.70  | 0.14 | 0.95 | 1.73  | -0.31  | 3.76  | 0.10 | 0.96 | No  |
| Bacteria | Firmicutes | Clostridia | Clostridiales | Dehalobacteriaceae  | Dehalobacterium              | 0.13   | 0.26 | 1.63   | -2.32  | 5.57  | 0.42 | 1.00 | 1.62   | -2.23  | 5.48  | 0.41 | 1.00 | 1.62   | -0.91  | 4.16  | 0.21 | 0.95 | 1.62  | -0.84  | 4.08  | 0.20 | 0.96 | No  |
| Bacteria | Firmicutes | Clostridia | Clostridiales | Dehalobacteriaceae  |                              | 2.59%  | -    | -1.03  | -7.44  | 5.38  | 0.75 | 1.00 | -0.55  | -6.81  | 5.71  | 0.86 | 1.00 | -1.13  | -5.26  | 2.99  | 0.59 | 0.95 | -0.78 | -4.78  | 3.21  | 0.70 | 0.97 | Yes |
| Bacteria | Firmicutes | Clostridia | Clostridiales | EtOH8               |                              | 2.39%  | -    | 2.82   | -3.86  | 9.51  | 0.41 | 1.00 | 3.21   | -3.31  | 9.73  | 0.33 | 1.00 | -1.13  | -5.43  | 3.17  | 0.61 | 0.95 | -0.84 | -5.01  | 3.32  | 0.69 | 0.96 | Yes |
| Bacteria | Firmicutes | Clostridia | Clostridiales | Eubacteriaceae      | Anaerofustus                 | 0.12   | 0.20 | 2.00   | -3.26  | 7.25  | 0.46 | 1.00 | 1.25   | -3.89  | 6.39  | 0.63 | 1.00 | 0.42   | -2.96  | 3.80  | 0.81 | 0.96 | -0.14 | -3.42  | 3.14  | 0.93 | 0.99 | No  |
| Bacteria | Firmicutes | Clostridia | Clostridiales | Eubacteriaceae      | Pseudoramibacter_Eubacterium | 0.49   | 0.48 | 1.75   | -0.68  | 4.18  | 0.16 | 1.00 | 1.92   | -0.44  | 4.29  | 0.11 | 1.00 | -0.36  | -1.92  | 1.20  | 0.65 | 0.95 | -0.26 | -1.77  | 1.25  | 0.74 | 0.97 | No  |
| Bacteria | Firmicutes | Clostridia | Clostridiales | Gracilibacteraceae  | Lutispora                    | 0.10%  | -    | 28.40  | -3.51  | 60.31 | 0.08 | 0.99 | 22.12  | -9.08  | 53.32 | 0.16 | 1.00 | 15.72  | -4.81  | 36.24 | 0.13 | 0.95 | 11.24 | -8.68  | 31.17 | 0.27 | 0.96 | Yes |
| Bacteria | Firmicutes | Clostridia | Clostridiales | Lachnospiraceae     | [Ruminococcus]               | 2.69   | 0.26 | -2.31  | -6.39  | 1.76  | 0.27 | 1.00 | -2.05  | -6.04  | 1.94  | 0.31 | 1.00 | -1.46  | -4.08  | 1.16  | 0.27 | 0.95 | -1.34 | -3.89  | 1.20  | 0.30 | 0.96 | No  |
| Bacteria | Firmicutes | Clostridia | Clostridiales | Lachnospiraceae     | Anaerostipes                 | 1.01   | 0.44 | -1.77  | -4.14  | 0.60  | 0.14 | 1.00 | -1.74  | -4.07  | 0.58  | 0.14 | 1.00 | -1.20  | -2.73  | 0.33  | 0.12 | 0.95 | -1.15 | -2.64  | 0.33  | 0.13 | 0.96 | No  |
| Bacteria | Firmicutes | Clostridia | Clostridiales | Lachnospiraceae     | Blautia†                     | 3.34   | 0.31 | -2.32  | -5.92  | 1.28  | 0.21 | 1.00 | -1.97  | -5.49  | 1.55  | 0.27 | 1.00 | -0.15  | -2.47  | 2.16  | 0.90 | 0.97 | 0.09  | -2.16  | 2.33  | 0.94 | 0.99 | No  |
| Bacteria | Firmicutes | Clostridia | Clostridiales | Lachnospiraceae     | Butyrivibrio                 | 2.39%  | -    | -3.95  | -10.56 | 2.66  | 0.24 | 1.00 | -3.69  | -10.14 | 2.77  | 0.26 | 1.00 | -2.33  | -6.58  | 1.92  | 0.28 | 0.95 | -2.13 | -6.25  | 1.99  | 0.31 | 0.96 | Yes |
| Bacteria | Firmicutes | Clostridia | Clostridiales | Lachnospiraceae     | Catonella                    | 0.90%  | -    | 4.35   | -6.40  | 15.09 | 0.43 | 1.00 | 1.34   | -9.18  | 11.86 | 0.80 | 1.00 | 3.42   | -3.48  | 10.33 | 0.33 | 0.95 | 1.27  | -5.45  | 7.98  | 0.71 | 0.97 | Yes |
| Bacteria | Firmicutes | Clostridia | Clostridiales | Lachnospiraceae     | Clostridium                  | 0.30%  | -    | 6.49   | -12.09 | 25.07 | 0.49 | 1.00 | 6.99   | -11.13 | 25.12 | 0.45 | 1.00 | 3.76   | -8.18  | 15.71 | 0.54 | 0.95 | 4.14  | -7.43  | 15.71 | 0.48 | 0.96 | Yes |
| Bacteria | Firmicutes | Clostridia | Clostridiales | Lachnospiraceae     | Coprococcus†                 | 3.03   | 0.32 | -3.27  | -6.58  | 0.04  | 0.05 | 0.99 | -3.26  | -6.49  | -0.02 | 0.05 | 1.00 | -1.70  | -3.82  | 0.43  | 0.12 | 0.95 | -1.73 | -3.80  | 0.33  | 0.10 | 0.96 | No  |
| Bacteria | Firmicutes | Clostridia | Clostridiales | Lachnospiraceae     | Dorea                        | 2.39   | 0.24 | -1.50  | -5.64  | 2.65  | 0.48 | 1.00 | -2.18  | -6.22  | 1.87  | 0.29 | 1.00 | -1.62  | -4.28  | 1.04  | 0.23 | 0.95 | -2.12 | -4.70  | 0.47  | 0.11 | 0.96 | No  |
| Bacteria | Firmicutes | Clostridia | Clostridiales | Lachnospiraceae     | Epulopiscium                 | 0.44   | 0.43 | -0.95  | -3.30  | 1.41  | 0.43 | 1.00 | -0.55  | -2.85  | 1.75  | 0.64 | 1.00 | -0.72  | -2.23  | 0.79  | 0.35 | 0.95 | -0.42 | -1.89  | 1.05  | 0.57 | 0.96 | No  |
| Bacteria | Firmicutes | Clostridia | Clostridiales | Lachnospiraceae     | Lachnobacterium              | 1.20%  | -    | 2.37   | -6.91  | 11.66 | 0.62 | 1.00 | 1.06   | -8.01  | 10.13 | 0.82 | 1.00 | -1.65  | -7.62  | 4.31  | 0.59 | 0.95 | -2.59 | -8.38  | 3.19  | 0.38 | 0.96 | Yes |
| Bacteria | Firmicutes | Clostridia | Clostridiales | Lachnospiraceae     | Lachnospira                  | 1.66   | 0.50 | 0.06   | -1.99  | 2.12  | 0.95 | 1.00 | -0.23  | -2.24  | 1.79  | 0.83 | 1.00 | -1.09  | -2.41  | 0.23  | 0.10 | 0.95 | -1.31 | -2.59  | -0.03 | 0.05 | 0.96 | No  |
| Bacteria | Firmicutes | Clostridia | Clostridiales | Lachnospiraceae     | Moryella                     | 1.69%  | -    | 5.99   | -1.84  | 13.82 | 0.13 | 1.00 | 7.06   | -0.58  | 14.70 | 0.07 | 1.00 | 5.09   | 0.06   | 10.12 | 0.05 | 0.95 | 5.86  | 0.99   | 10.74 | 0.02 | 0.96 | Yes |
| Bacteria | Firmicutes | Clostridia | Clostridiales | Lachnospiraceae     | Oribacterium                 | 16.05% | -    | 1.46   | -1.28  | 4.21  | 0.30 | 1.00 | 1.05   | -1.63  | 3.73  | 0.44 | 1.00 | 1.25   | -0.51  | 3.02  | 0.16 | 0.95 | 0.97  | -0.74  | 2.68  | 0.26 | 0.96 | Yes |
| Bacteria | Firmicutes | Clostridia | Clostridiales | Lachnospiraceae     | Other                        | 1.66   | 0.24 | -2.88  | -7.11  | 1.35  | 0.18 | 1.00 | -3.16  | -7.30  | 0.98  | 0.13 | 1.00 | -0.35  | -3.07  | 2.37  | 0.80 | 0.96 | -0.62 | -3.26  | 2.02  | 0.65 | 0.96 | No  |
| Bacteria | Firmicutes | Clostridia | Clostridiales | Lachnospiraceae     | Pseudobutyrvibrio            | 0.70%  | -    | -2.53  | -14.80 | 9.73  | 0.69 | 1.00 | -1.95  | -13.92 | 10.02 | 0.75 | 1.00 | -3.19  | -11.07 | 4.70  | 0.43 | 0.95 | -2.76 | -10.40 | 4.88  | 0.48 | 0.96 | Yes |
| Bacteria | Firmicutes | Clostridia | Clostridiales | Lachnospiraceae     | Roseburia                    | 0.55   | 0.36 | 0.54   | -2.26  | 3.35  | 0.70 | 1.00 | 0.19   | -2.55  | 2.93  | 0.89 | 1.00 | -1.17  | -2.97  | 0.64  | 0.20 | 0.95 | -1.42 | -3.16  | 0.33  | 0.11 | 0.96 | No  |
| Bacteria | Firmicutes | Clostridia | Clostridiales | Lachnospiraceae     | Shuttleworthia               | 0.80%  | -    | -4.37  | -15.77 | 7.03  | 0.45 | 1.00 | -4.43  | -15.55 | 6.69  | 0.43 | 1.00 | 1.27   | -6.06  | 8.60  | 0.73 | 0.96 | 1.24  | -5.86  | 8.34  | 0.73 | 0.97 | Yes |
| Bacteria | Firmicutes | Clostridia | Clostridiales | Lachnospiraceae     |                              | 3.05   | 0.22 | -1.36  | -6.04  | 3.32  | 0.57 | 1.00 | -1.19  | -5.75  | 3.38  | 0.61 | 1.00 | -0.19  | -3.20  | 2.82  | 0.90 | 0.97 | -0.09 | -3.01  | 2.83  | 0.95 | 0.99 | No  |
| Bacteria | Firmicutes | Clostridia | Clostridiales | Other               | Other                        | 2.40   | 0.34 | 1.31   | -1.72  | 4.34  | 0.40 | 1.00 | 1.70   | -1.26  | 4.66  | 0.26 | 1.00 | 2.12   | 0.17   | 4.06  | 0.03 | 0.95 | 2.41  | 0.52   | 4.29  | 0.01 | 0.96 | No  |
| Bacteria | Firmicutes | Clostridia | Clostridiales | Peptococcaceae      | Desulfurispora               | 0.40%  | -    | 1.76   | -14.28 | 17.79 | 0.83 | 1.00 | 7.29   | -8.42  | 23.00 | 0.36 | 1.00 | -4.16  | -14.47 | 6.14  | 0.43 | 0.95 | -0.23 | -10.26 | 9.81  | 0.96 | 0.99 | Yes |
| Bacteria | Firmicutes | Clostridia | Clostridiales | Peptococcaceae      | Other                        | 0.20%  | -    | -11.24 | -33.95 | 11.47 | 0.33 | 1.00 | -6.80  | -29.00 | 15.39 | 0.55 | 1.00 | -10.38 | -24.98 | 4.21  | 0.16 | 0.95 | -7.22 | -21.38 | 6.95  | 0.32 | 0.96 | Yes |
| Bacteria | Firmicutes | Clostridia | Clostridiales | Peptococcaceae      | Peptococcus                  | 0.60   | 0.61 | 0.41   | -1.36  | 2.17  | 0.65 | 1.00 | 0.60   | -1.12  | 2.33  | 0.49 | 1.00 | 0.05   | -1.09  | 1.18  | 0.93 | 0.98 | 0.21  | -0.89  | 1.31  | 0.71 | 0.97 | No  |
| Bacteria | Firmicutes | Clostridia | Clostridiales | Peptococcaceae      | rc4-4                        | 3.09%  | -    | 3.04   | -2.84  | 8.92  | 0.31 | 1.00 | 2.63   | -3.11  | 8.37  | 0.37 | 1.00 | -0.28  | -4.07  | 3.50  | 0.88 | 0.97 | -0.57 | -4.23  | 3.10  |      |      |     |

|          |                  |                  |                         |                           |                      |        |      |        |        |       |      |      |        |        |       |      |      |        |        |       |      |      |        |        |       |      |      |     |
|----------|------------------|------------------|-------------------------|---------------------------|----------------------|--------|------|--------|--------|-------|------|------|--------|--------|-------|------|------|--------|--------|-------|------|------|--------|--------|-------|------|------|-----|
| Bacteria | Firmicutes       | Clostridia       | Clostridiales           |                           |                      | 3.38   | 0.24 | 0.72   | -3.54  | 4.97  | 0.74 | 1.00 | 0.55   | -3.61  | 4.71  | 0.80 | 1.00 | 1.25   | -1.49  | 3.98  | 0.37 | 0.95 | 1.18   | -1.47  | 3.84  | 0.38 | 0.96 | No  |
| Bacteria | Firmicutes       | Clostridia       | MBA08                   |                           |                      | 0.30%  | -    | 1.11   | -17.62 | 19.83 | 0.91 | 1.00 | 0.29   | -17.98 | 18.57 | 0.98 | 1.00 | 0.30   | -11.73 | 12.34 | 0.96 | 0.98 | -0.22  | -11.88 | 11.45 | 0.97 | 0.99 | Yes |
| Bacteria | Firmicutes       | Clostridia       | Natranaerobiales        | ML1228J-1                 |                      | 0.20%  | -    | -5.96  | -28.59 | 16.68 | 0.61 | 1.00 | -3.96  | -26.05 | 18.13 | 0.73 | 1.00 | -1.19  | -15.74 | 13.36 | 0.87 | 0.96 | 0.28   | -13.82 | 14.38 | 0.97 | 0.99 | Yes |
| Bacteria | Firmicutes       | Clostridia       | OPB54                   |                           |                      | 0.20%  | -    | 7.94   | -14.81 | 30.70 | 0.49 | 1.00 | 10.12  | -12.08 | 32.33 | 0.37 | 1.00 | 7.13   | -7.50  | 21.75 | 0.34 | 0.95 | 8.69   | -5.48  | 22.86 | 0.23 | 0.96 | Yes |
| Bacteria | Firmicutes       | Clostridia       | Other                   | Other                     | Other                | 1.69%  | -    | 5.15   | -2.72  | 13.03 | 0.20 | 1.00 | 3.66   | -4.04  | 11.36 | 0.35 | 1.00 | 1.62   | -3.45  | 6.68  | 0.53 | 0.95 | 0.56   | -4.36  | 5.47  | 0.82 | 0.97 | Yes |
| Bacteria | Firmicutes       | Clostridia       | Thermoanaerobacteriales | Caldicellulosiruptoraceae | Caldicellulosiruptor | 0.50%  | -    | 13.96  | -0.53  | 28.45 | 0.06 | 0.99 | 13.95  | -0.18  | 28.09 | 0.05 | 1.00 | 10.83  | 1.52   | 20.13 | 0.02 | 0.95 | 10.84  | 1.82   | 19.85 | 0.02 | 0.96 | Yes |
| Bacteria | Firmicutes       | Clostridia       | Thermoanaerobacteriales | Thermodesulfobiaceae      | Coprothermobacter    | 0.30%  | -    | -2.77  | -21.31 | 15.77 | 0.77 | 1.00 | -2.65  | -20.74 | 15.44 | 0.77 | 1.00 | -0.69  | -12.61 | 11.22 | 0.91 | 0.97 | -0.60  | -12.15 | 10.95 | 0.92 | 0.99 | Yes |
| Bacteria | Firmicutes       | Clostridia       |                         |                           |                      | 1.10%  | -    | -0.18  | -9.89  | 9.52  | 0.97 | 1.00 | -0.66  | -10.13 | 8.81  | 0.89 | 1.00 | -1.67  | -7.91  | 4.56  | 0.60 | 0.95 | -2.01  | -8.06  | 4.03  | 0.51 | 0.96 | Yes |
| Bacteria | Firmicutes       | Erysipelotrichi  | Erysipelotrichales      | Erysipelotrichaceae       | [Eubacterium]        | 2.17   | 0.58 | -2.24  | -3.99  | -0.49 | 0.01 | 0.99 | -1.88  | -3.59  | -0.17 | 0.03 | 1.00 | -0.86  | -1.98  | 0.27  | 0.14 | 0.95 | -0.60  | -1.70  | 0.49  | 0.28 | 0.96 | No  |
| Bacteria | Firmicutes       | Erysipelotrichi  | Erysipelotrichales      | Erysipelotrichaceae       | Allobaculum          | 17.55% | -    | 1.13   | -1.56  | 3.83  | 0.41 | 1.00 | 0.78   | -1.85  | 3.42  | 0.56 | 1.00 | -0.20  | -1.93  | 1.54  | 0.82 | 0.96 | -0.43  | -2.11  | 1.25  | 0.62 | 0.96 | Yes |
| Bacteria | Firmicutes       | Erysipelotrichi  | Erysipelotrichales      | Erysipelotrichaceae       | Bulleidia            | 0.65   | 0.41 | 1.56   | -0.91  | 4.04  | 0.22 | 1.00 | 1.47   | -0.95  | 3.88  | 0.23 | 1.00 | 1.24   | -0.36  | 2.83  | 0.13 | 0.95 | 1.18   | -0.36  | 2.72  | 0.13 | 0.96 | No  |
| Bacteria | Firmicutes       | Erysipelotrichi  | Erysipelotrichales      | Erysipelotrichaceae       | Catenibacterium      | 0.95   | 0.85 | -0.18  | -1.46  | 1.10  | 0.78 | 1.00 | -0.23  | -1.48  | 1.01  | 0.71 | 1.00 | 0.29   | -0.53  | 1.12  | 0.48 | 0.95 | 0.25   | -0.55  | 1.04  | 0.54 | 0.96 | No  |
| Bacteria | Firmicutes       | Erysipelotrichi  | Erysipelotrichales      | Erysipelotrichaceae       | cc_115               | 4.69%  | -    | 0.12   | -4.70  | 4.95  | 0.96 | 1.00 | 0.57   | -4.14  | 5.28  | 0.81 | 1.00 | 1.59   | -1.51  | 4.69  | 0.31 | 0.95 | 1.92   | -1.08  | 4.92  | 0.21 | 0.96 | Yes |
| Bacteria | Firmicutes       | Erysipelotrichi  | Erysipelotrichales      | Erysipelotrichaceae       | Coprobacillus        | 0.40   | 0.43 | 1.61   | -0.89  | 4.11  | 0.21 | 1.00 | 1.44   | -1.00  | 3.88  | 0.25 | 1.00 | -0.01  | -1.61  | 1.60  | 0.99 | 1.00 | -0.11  | -1.67  | 1.44  | 0.89 | 0.99 | No  |
| Bacteria | Firmicutes       | Erysipelotrichi  | Erysipelotrichales      | Erysipelotrichaceae       | Erysipelothrix       | 3.39%  | -    | -2.06  | -7.72  | 3.60  | 0.48 | 1.00 | -1.34  | -6.87  | 4.18  | 0.63 | 1.00 | -0.59  | -4.23  | 3.05  | 0.75 | 0.96 | -0.07  | -3.60  | 3.46  | 0.97 | 0.99 | Yes |
| Bacteria | Firmicutes       | Erysipelotrichi  | Erysipelotrichales      | Erysipelotrichaceae       | Holdemania           | 0.34   | 0.34 | -0.43  | -3.56  | 2.69  | 0.79 | 1.00 | -0.21  | -3.25  | 2.84  | 0.89 | 1.00 | -0.54  | -2.54  | 1.47  | 0.60 | 0.95 | -0.37  | -2.32  | 1.58  | 0.71 | 0.97 | No  |
| Bacteria | Firmicutes       | Erysipelotrichi  | Erysipelotrichales      | Erysipelotrichaceae       | Other                | 3.39%  | -    | 5.03   | -0.56  | 10.62 | 0.08 | 0.99 | 5.98   | 0.52   | 11.43 | 0.03 | 1.00 | 0.85   | -2.75  | 4.44  | 0.64 | 0.95 | 1.53   | -1.96  | 5.01  | 0.39 | 0.96 | Yes |
| Bacteria | Firmicutes       | Erysipelotrichi  | Erysipelotrichales      | Erysipelotrichaceae       | p-75-a5              | 11.17% | -    | -0.60  | -3.82  | 2.61  | 0.71 | 1.00 | -0.68  | -3.81  | 2.46  | 0.67 | 1.00 | -0.54  | -2.61  | 1.53  | 0.61 | 0.95 | -0.59  | -2.59  | 1.41  | 0.56 | 0.96 | Yes |
| Bacteria | Firmicutes       | Erysipelotrichi  | Erysipelotrichales      | Erysipelotrichaceae       | PSB-M-3              | 0.70%  | -    | 1.44   | -10.69 | 13.57 | 0.82 | 1.00 | -0.31  | -12.16 | 11.53 | 0.96 | 1.00 | 2.45   | -5.34  | 10.25 | 0.54 | 0.95 | 1.20   | -6.35  | 8.76  | 0.75 | 0.97 | Yes |
| Bacteria | Firmicutes       | Erysipelotrichi  | Erysipelotrichales      | Erysipelotrichaceae       | RFN20                | 1.79%  | -    | 2.65   | -5.01  | 10.31 | 0.50 | 1.00 | 3.33   | -4.14  | 10.80 | 0.38 | 1.00 | -1.29  | -6.21  | 3.64  | 0.61 | 0.95 | -0.79  | -5.56  | 3.99  | 0.75 | 0.97 | Yes |
| Bacteria | Firmicutes       | Erysipelotrichi  | Erysipelotrichales      | Erysipelotrichaceae       | Sharpea              | 6.28%  | -    | 4.02   | -0.15  | 8.18  | 0.06 | 0.99 | 3.01   | -1.07  | 7.09  | 0.15 | 1.00 | 3.17   | 0.49   | 5.84  | 0.02 | 0.95 | 2.46   | -0.14  | 5.06  | 0.06 | 0.96 | Yes |
| Bacteria | Firmicutes       | Erysipelotrichi  | Erysipelotrichales      | Erysipelotrichaceae       | Other                | 2.83   | 0.38 | -0.72  | -3.40  | 1.96  | 0.60 | 1.00 | -0.93  | -3.55  | 1.69  | 0.49 | 1.00 | -1.74  | -3.46  | -0.02 | 0.05 | 0.95 | -1.90  | -3.57  | -0.24 | 0.03 | 0.96 | No  |
| Bacteria | Firmicutes       | Other            | Other                   | Other                     | Other                | 0.20%  | -    | -5.93  | -28.60 | 16.74 | 0.61 | 1.00 | -2.52  | -24.66 | 19.62 | 0.82 | 1.00 | -4.84  | -19.41 | 9.73  | 0.51 | 0.95 | -2.38  | -16.51 | 11.75 | 0.74 | 0.97 | Yes |
| Bacteria | Fusobacteria     | Fusobacteriia    | Fusobacteriales         | Fusobacteriaceae          | Cetobacterium        | 15.55% | -    | 0.87   | -1.95  | 3.68  | 0.55 | 1.00 | 0.39   | -2.37  | 3.15  | 0.78 | 1.00 | 1.06   | -0.75  | 2.87  | 0.25 | 0.95 | 0.67   | -1.09  | 2.43  | 0.45 | 0.96 | Yes |
| Bacteria | Fusobacteria     | Fusobacteriia    | Fusobacteriales         | Fusobacteriaceae          | Fusobacterium*       | 0.40   | 0.59 | 2.44   | 0.60   | 4.28  | 0.01 | 0.99 | 1.76   | -0.05  | 3.57  | 0.06 | 1.00 | 0.31   | -0.88  | 1.49  | 0.61 | 0.95 | -0.21  | -1.37  | 0.95  | 0.72 | 0.97 | No  |
| Bacteria | Fusobacteria     | Fusobacteriia    | Fusobacteriales         | Fusobacteriaceae          | Psychrylobacter      | 0.30%  | -    | -9.40  | -27.95 | 9.15  | 0.32 | 1.00 | -7.04  | -25.16 | 11.07 | 0.45 | 1.00 | -9.10  | -21.02 | 2.82  | 0.13 | 0.95 | -7.38  | -18.94 | 4.18  | 0.21 | 0.96 | Yes |
| Bacteria | Fusobacteria     | Fusobacteriia    | Fusobacteriales         | Fusobacteriaceae          | u114                 | 0.20%  | -    | 10.35  | -12.28 | 32.98 | 0.37 | 1.00 | 6.73   | -15.37 | 28.84 | 0.55 | 1.00 | 8.37   | -6.18  | 22.91 | 0.26 | 0.95 | 5.84   | -8.26  | 19.95 | 0.42 | 0.96 | Yes |
| Bacteria | Fusobacteria     | Fusobacteriia    | Fusobacteriales         | Fusobacteriaceae          | Other                | 0.80%  | -    | 8.72   | -2.63  | 20.06 | 0.13 | 1.00 | 9.07   | -2.00  | 20.14 | 0.11 | 1.00 | 3.08   | -4.22  | 10.38 | 0.41 | 0.95 | 3.35   | -3.73  | 10.42 | 0.35 | 0.96 | Yes |
| Bacteria | Fusobacteria     | Fusobacteriia    | Fusobacteriales         | Leptotrichiaceae          | Leptotrichia         | 3.59%  | -    | 3.14   | -2.32  | 8.60  | 0.26 | 1.00 | 1.47   | -3.88  | 6.82  | 0.59 | 1.00 | -0.29  | -3.80  | 3.23  | 0.87 | 0.96 | -1.50  | -4.92  | 1.91  | 0.39 | 0.96 | Yes |
| Bacteria | Fusobacteria     | Fusobacteriia    | Fusobacteriales         | Leptotrichiaceae          | Sneathia             | 1.69%  | -    | -6.93  | -14.78 | 0.92  | 0.08 | 0.99 | -6.57  | -14.23 | 1.10  | 0.09 | 1.00 | -2.92  | -7.97  | 2.14  | 0.26 | 0.95 | -2.65  | -7.55  | 2.24  | 0.29 | 0.96 | Yes |
| Bacteria | Fusobacteria     | Fusobacteriia    | Fusobacteriales         |                           |                      | 0.10%  | -    | -29.28 | -61.20 | 2.64  | 0.07 | 0.99 | -25.22 | -56.40 | 5.95  | 0.11 | 1.00 | -25.78 | -46.27 | -5.29 | 0.01 | 0.95 | -22.87 | -42.75 | -2.99 | 0.02 | 0.96 | Yes |
| Bacteria | Gemmatimonadetes | Gemm-1           |                         |                           |                      | 3.99%  | -    | 1.47   | -3.72  | 6.65  | 0.58 | 1.00 | 2.49   | -2.58  | 7.56  | 0.34 | 1.00 | 0.82   | -2.51  | 4.16  | 0.63 | 0.95 | 1.57   | -1.67  | 4.80  | 0.34 | 0.96 | Yes |
| Bacteria | Gemmatimonadetes | Gemm-2           |                         |                           |                      | 0.20%  | -    | -12.38 | -35.20 | 10.45 | 0.29 | 1.00 | -15.72 | -38.00 | 6.56  | 0.17 | 1.00 | -3.00  | -17.68 | 11.68 | 0.69 | 0.95 | -5.42  | -19.65 | 8.82  | 0.46 | 0.96 | Yes |
| Bacteria | Gemmatimonadetes | Gemm-3           |                         |                           |                      | 1.40%  | -    | -3.30  | -11.98 | 5.38  | 0.46 | 1.00 | -3.45  | -11.92 | 5.01  | 0.42 | 1.00 | -2.82  | -8.39  | 2.76  | 0.32 | 0.95 | -2.90  | -8.31  | 2.50  | 0.29 | 0.96 | Yes |
| Bacteria | Gemmatimonadetes | Gemm-4           |                         |                           |                      | 0.20%  | -    | 2.44   | -20.34 | 25.22 | 0.83 | 1.00 | 0.42   | -21.81 | 22.66 | 0.97 | 1.00 | 6.15   | -8.49  | 20.79 | 0.41 | 0.95 | 4.73   | -9.46  | 18.92 | 0.51 | 0.96 | Yes |
| Bacteria | Gemmatimonadetes | Gemm-5           |                         |                           |                      | 1.30%  | -    | -3.81  | -12.81 | 5.19  | 0.41 | 1.00 | -4.34  | -13.12 | 4.44  | 0.33 | 1.00 | -2.09  | -7.88  | 3.69  | 0.48 | 0.95 | -2.45  | -8.06  | 3.15  | 0.39 | 0.96 | Yes |
| Bacteria | Gemmatimonadetes | Gemmatimonadetes | C114                    |                           |                      | 0.40%  | -    | -2.33  | -18.49 | 13.83 | 0.78 | 1.00 | -4.27  | -20.05 | 11.50 | 0.60 | 1.00 | -2.51  | -12.90 | 7.88  | 0.63 | 0.95 | -3.89  | -13.96 | 6.18  | 0.45 | 0.96 | Yes |
| Bacteria | Gemmatimonadetes | Gemmatimonadetes | Ellin5290               |                           |                      | 0.50%  | -    | -0.81  | -15.26 | 13.65 | 0.91 | 1.00 | -1.88  | -15.99 | 12.22 | 0.79 | 1.00 | -7.75  | -17.03 | 1.53  | 0.10 | 0.95 | -8.51  | -17.50 | 0.49  | 0.06 | 0.96 | Yes |
| Bacteria | Gemmatimonadetes | Gemmatimonadetes | Gemmatimonadales        | Ellin5301                 |                      | 0.40%  | -    | -1.53  | -17.61 | 14.55 | 0.85 | 1.00 | 0.41   | -15.29 | 16.11 | 0.96 | 1.00 | -0.77  | -11.11 | 9.57  | 0.88 | 0.97 | 0.63   | -9.39  | 10.66 | 0.90 | 0.99 | Yes |
| Bacteria | Gemmatimonadetes | Gemmatimonadetes | Gemmatimonadales        | Gemmatimonadaceae         | Gemmatimonas         | 0.20%  | -    | 6.80   | -15.90 | 29.51 | 0.56 | 1.00 | 9.08   | -13.08 | 31.25 | 0.42 | 1.00 | 0.91   | -13.69 | 15.51 | 0.90 | 0.97 | 2.53   | -11.62 | 16.68 | 0.73 | 0.97 | Yes |
| Bacteria | Gemmatimonadetes | Gemmatimonadetes | Gemmatimonadales        | Other                     | Other                | 0.30%  | -    | -2.38  | -20.88 | 16.11 | 0.80 | 1.00 | -4.31  | -22.36 | 13.74 | 0.64 | 1.00 | -2.13  | -14.02 | 9.76  | 0.73 | 0.96 | -3.50  | -15.02 | 8.02  | 0.55 | 0.96 | Yes |
| Bacteria | Gemmatimonadetes | Gemmatimonadetes | Gemmatimonadales        |                           |                      | 0.60%  | -    | -0.72  | -13.86 | 12.41 | 0.91 | 1.00 | 2.40   | -10.45 | 15.24 | 0.71 | 1.00 | 2.08   | -6.36  | 10.52 | 0.63 | 0.95 | 4.34   | -3.85  | 12.54 | 0.30 | 0.96 | Yes |
| Bacteria | Gemmatimonadetes | Gemmatimonadetes | KD8-87                  |                           |                      | 0.60%  | -    | 5.53   | -7.57  | 18.63 | 0.41 | 1.00 | 4.16   | -8.63  | 16.95 | 0.52 | 1.00 | 0.12   | -8.30  | 8.55  | 0.98 | 0.99 | -0.83  | -8.99  | 7.34  | 0.84 | 0.98 | Yes |
| Bacteria | Gemmatimonadetes | Gemmatimonadetes | N1423WL                 |                           |                      | 0.20%  | -    | -22.16 | -44.73 | 0.41  | 0.05 | 0.99 | -20.10 | -42.14 | 1.93  | 0.07 | 1.00 | -18.63 | -33.12 | -4.14 | 0.01 | 0.95 | -17.14 | -31.19 | -3.09 | 0.02 | 0.96 | Yes |
| Bacteria | Gemmatimonadetes | Gemmatimonadetes |                         |                           |                      | 2.79%  | -    | 1.76   | -4.36  | 7.89  | 0.57 | 1.00 | 0.96   | -5.02  | 6.94  | 0.75 | 1.00 | -3.12  | -7.05  | 0.82  | 0.12 | 0.95 | -3.68  | -7.49  | 0.13  | 0.06 | 0.96 | Yes |
| Bacteria | Gemmatimonadetes | Gemmatimonadetes |                         |                           |                      | 0.60%  | -    | 5.44   | -7.69  | 18.57 | 0.42 | 1.00 | 5.53   | -7.28  | 18.34 | 0.40 | 1.00 | 4.58   | -3.86  | 13.02 | 0.29 | 0.95 | 4.67   | -3.50  | 12.85 | 0.26 | 0.96 | Yes |
| Bacteria | GN02             | BD1-5            |                         |                           |                      | 0.10%  | -    | -17.53 | -49.54 | 14.47 | 0.28 | 1.00 | -19.96 | -51.19 | 11.27 | 0.21 | 1.00 | -2.65  | -23.24 | 17.94 | 0.80 | 0.96 | -4.41  | -24.36 | 15.54 | 0.66 | 0.96 | Yes |
| Bacteria | GN04             | GN15             |                         |                           |                      | 0.20%  | -    | -12.06 | -34.66 | 10.54 | 0.30 | 1.00 | -7.20  | -29.30 | 14.90 | 0.52 | 1.00 | -3.65  | -18.18 | 10.89 | 0.62 | 0.95 | -0.12  | -14.23 | 13.99 | 0.99 | 1.00 | Yes |
| Bacteria | Lentisphaerae    | [Lentisphaeria]  | Victivallales           | Victivallaceae            |                      | 6.78%  | -    |        |        |       |      |      |        |        |       |      |      |        |        |       |      |      |        |        |       |      |      |     |

|          |                |                     |                  |                     |                  |        |      |        |        |       |      |      |        |        |       |      |      |        |        |       |      |      |        |        |       |      |      |     |
|----------|----------------|---------------------|------------------|---------------------|------------------|--------|------|--------|--------|-------|------|------|--------|--------|-------|------|------|--------|--------|-------|------|------|--------|--------|-------|------|------|-----|
| Bacteria | Planctomycetes | Planctomycetia      | Gemmatales       | Gemmataceae         | Gemmata          | 1.00%  | -    | -1.10  | -11.42 | 9.22  | 0.83 | 1.00 | -1.13  | -11.20 | 8.95  | 0.83 | 1.00 | -1.43  | -8.06  | 5.20  | 0.67 | 0.95 | -1.40  | -7.83  | 5.03  | 0.67 | 0.96 | Yes |
| Bacteria | Planctomycetes | Planctomycetia      | Gemmatales       | Gemmataceae         |                  | 0.90%  | -    | 0.27   | -10.59 | 11.13 | 0.96 | 1.00 | -0.15  | -10.74 | 10.45 | 0.98 | 1.00 | -0.78  | -7.76  | 6.20  | 0.83 | 0.96 | -1.03  | -7.80  | 5.73  | 0.77 | 0.97 | Yes |
| Bacteria | Planctomycetes | Planctomycetia      | Gemmatales       | Isosphaeraceae      | Nostocoida       | 0.10%  | -    | 12.41  | -19.53 | 44.34 | 0.45 | 1.00 | 10.49  | -20.67 | 41.65 | 0.51 | 1.00 | 17.03  | -3.47  | 37.54 | 0.10 | 0.95 | 15.73  | -4.14  | 35.61 | 0.12 | 0.96 | Yes |
| Bacteria | Planctomycetes | Planctomycetia      | Gemmatales       | Isosphaeraceae      |                  | 0.30%  | -    | 4.20   | -14.32 | 22.72 | 0.66 | 1.00 | 3.86   | -14.21 | 21.93 | 0.68 | 1.00 | -4.66  | -16.57 | 7.24  | 0.44 | 0.95 | -4.87  | -16.40 | 6.66  | 0.41 | 0.96 | Yes |
| Bacteria | Planctomycetes | Planctomycetia      | Pirellulales     | Pirellulaceae       | A17              | 0.60%  | -    | -3.79  | -16.93 | 9.34  | 0.57 | 1.00 | -3.85  | -16.67 | 8.96  | 0.56 | 1.00 | 0.55   | -7.90  | 8.99  | 0.90 | 0.97 | 0.54   | -7.64  | 8.73  | 0.90 | 0.99 | Yes |
| Bacteria | Planctomycetes | Planctomycetia      | Pirellulales     | Pirellulaceae       | Pirellula        | 0.20%  | -    | -12.60 | -35.30 | 10.09 | 0.28 | 1.00 | -13.66 | -35.80 | 8.48  | 0.23 | 1.00 | -6.27  | -20.86 | 8.33  | 0.40 | 0.95 | -6.99  | -21.13 | 7.15  | 0.33 | 0.96 | Yes |
| Bacteria | Planctomycetes | Planctomycetia      | Pirellulales     | Pirellulaceae       |                  | 0.40%  | -    | -0.47  | -16.51 | 15.58 | 0.95 | 1.00 | -2.35  | -18.01 | 13.31 | 0.77 | 1.00 | 5.93   | -4.37  | 16.24 | 0.26 | 0.95 | 4.62   | -5.37  | 14.62 | 0.36 | 0.96 | Yes |
| Bacteria | Planctomycetes | Planctomycetia      | Planctomycetales | Planctomycetaceae   | Planctomyces     | 0.80%  | -    | -1.91  | -13.43 | 9.61  | 0.75 | 1.00 | -2.60  | -13.84 | 8.64  | 0.65 | 1.00 | -1.58  | -8.98  | 5.82  | 0.68 | 0.95 | -2.03  | -9.21  | 5.14  | 0.58 | 0.96 | Yes |
| Bacteria | Planctomycetes | vadinHA49           |                  |                     | DH61             | 0.30%  | -    | 6.96   | -11.50 | 25.43 | 0.46 | 1.00 | 7.50   | -10.52 | 25.51 | 0.41 | 1.00 | 3.20   | -8.67  | 15.07 | 0.60 | 0.95 | 3.58   | -7.92  | 15.08 | 0.54 | 0.96 | Yes |
| Bacteria | Proteobacteria | Alphaproteobacteria | BD7-3            |                     |                  | 0.80%  | -    | -0.31  | -11.65 | 11.04 | 0.96 | 1.00 | -1.94  | -13.02 | 9.14  | 0.73 | 1.00 | -0.84  | -8.13  | 6.46  | 0.82 | 0.96 | -1.98  | -9.05  | 5.09  | 0.58 | 0.96 | Yes |
| Bacteria | Proteobacteria | Alphaproteobacteria | Caulobacterales  | Caulobacteraceae    | Asticcacaulis    | 0.50%  | -    | -4.51  | -18.89 | 9.87  | 0.54 | 1.00 | -8.93  | -22.99 | 5.14  | 0.21 | 1.00 | -1.88  | -11.12 | 7.37  | 0.69 | 0.95 | -5.01  | -13.99 | 3.97  | 0.27 | 0.96 | Yes |
| Bacteria | Proteobacteria | Alphaproteobacteria | Caulobacterales  | Caulobacteraceae    | Brevundimonas    | 3.89%  | -    | 1.86   | -3.39  | 7.12  | 0.49 | 1.00 | 1.69   | -3.43  | 6.82  | 0.52 | 1.00 | 1.20   | -2.18  | 4.58  | 0.49 | 0.95 | 1.09   | -2.19  | 4.36  | 0.51 | 0.96 | Yes |
| Bacteria | Proteobacteria | Alphaproteobacteria | Caulobacterales  | Caulobacteraceae    | Mycoplana        | 7.08%  | -    | 0.68   | -3.28  | 4.65  | 0.74 | 1.00 | 0.29   | -3.59  | 4.16  | 0.88 | 1.00 | -0.77  | -3.32  | 1.77  | 0.55 | 0.95 | -1.05  | -3.52  | 1.42  | 0.40 | 0.96 | Yes |
| Bacteria | Proteobacteria | Alphaproteobacteria | Caulobacterales  | Caulobacteraceae    | Phenylobacterium | 4.69%  | -    | 4.38   | -0.39  | 9.16  | 0.07 | 0.99 | 3.56   | -1.11  | 8.22  | 0.14 | 1.00 | 2.28   | -0.79  | 5.35  | 0.15 | 0.95 | 1.70   | -1.29  | 4.68  | 0.26 | 0.96 | Yes |
| Bacteria | Proteobacteria | Alphaproteobacteria | Caulobacterales  | Caulobacteraceae    |                  | 15.75% | -    | 0.33   | -2.48  | 3.15  | 0.82 | 1.00 | 0.25   | -2.50  | 3.00  | 0.86 | 1.00 | -0.58  | -2.39  | 1.23  | 0.53 | 0.95 | -0.63  | -2.38  | 1.13  | 0.48 | 0.96 | Yes |
| Bacteria | Proteobacteria | Alphaproteobacteria | Caulobacterales  |                     |                  | 0.10%  | -    | 3.39   | -28.64 | 35.42 | 0.84 | 1.00 | 7.87   | -23.40 | 39.14 | 0.62 | 1.00 | 8.00   | -12.59 | 28.59 | 0.45 | 0.95 | 11.24  | -8.71  | 31.20 | 0.27 | 0.96 | Yes |
| Bacteria | Proteobacteria | Alphaproteobacteria | Ellin329         |                     |                  | 1.30%  | -    | 5.06   | -3.93  | 14.05 | 0.27 | 1.00 | 5.10   | -3.67  | 13.87 | 0.25 | 1.00 | 1.71   | -4.07  | 7.49  | 0.56 | 0.95 | 1.75   | -3.85  | 7.35  | 0.54 | 0.96 | Yes |
| Bacteria | Proteobacteria | Alphaproteobacteria | Kiloniellales    | Kiloniellaceae      | Thalassospira    | 0.50%  | -    | -3.39  | -17.77 | 10.99 | 0.64 | 1.00 | -3.38  | -17.40 | 10.65 | 0.64 | 1.00 | -2.68  | -11.92 | 6.56  | 0.57 | 0.95 | -2.67  | -11.62 | 6.29  | 0.56 | 0.96 | Yes |
| Bacteria | Proteobacteria | Alphaproteobacteria | Kiloniellales    |                     |                  | 0.50%  | -    | 3.21   | -11.13 | 17.54 | 0.66 | 1.00 | 4.82   | -9.18  | 18.81 | 0.50 | 1.00 | 0.12   | -9.09  | 9.34  | 0.98 | 0.99 | 1.28   | -7.65  | 10.22 | 0.78 | 0.97 | Yes |
| Bacteria | Proteobacteria | Alphaproteobacteria | Other            | Other               | Other            | 0.20%  | -    | -6.59  | -29.22 | 16.03 | 0.57 | 1.00 | -7.16  | -29.24 | 14.91 | 0.52 | 1.00 | -3.64  | -18.19 | 10.90 | 0.62 | 0.95 | -4.02  | -18.11 | 10.08 | 0.58 | 0.96 | Yes |
| Bacteria | Proteobacteria | Alphaproteobacteria | RF32             |                     |                  | 9.47%  | -    | -0.89  | -4.39  | 2.61  | 0.62 | 1.00 | -0.77  | -4.18  | 2.65  | 0.66 | 1.00 | -0.75  | -3.00  | 1.50  | 0.51 | 0.95 | -0.65  | -2.83  | 1.53  | 0.56 | 0.96 | Yes |
| Bacteria | Proteobacteria | Alphaproteobacteria | Rhizobiales      | Aurantimonadaceae   |                  | 1.60%  | -    | 5.74   | -2.37  | 13.85 | 0.17 | 1.00 | 5.87   | -2.05  | 13.78 | 0.15 | 1.00 | 0.97   | -4.25  | 6.19  | 0.72 | 0.96 | 1.08   | -3.98  | 6.13  | 0.68 | 0.96 | Yes |
| Bacteria | Proteobacteria | Alphaproteobacteria | Rhizobiales      | Bartonellaceae      | Bartonella       | 0.60%  | -    | -5.99  | -19.19 | 7.21  | 0.37 | 1.00 | -6.21  | -19.09 | 6.67  | 0.34 | 1.00 | -0.42  | -8.91  | 8.07  | 0.92 | 0.98 | -0.53  | -8.75  | 7.70  | 0.90 | 0.99 | Yes |
| Bacteria | Proteobacteria | Alphaproteobacteria | Rhizobiales      | Bartonellaceae      | Other            | 0.50%  | -    | -8.48  | -22.78 | 5.81  | 0.24 | 1.00 | -11.32 | -25.28 | 2.64  | 0.11 | 1.00 | -1.79  | -10.98 | 7.41  | 0.70 | 0.95 | -3.77  | -12.69 | 5.16  | 0.41 | 0.96 | Yes |
| Bacteria | Proteobacteria | Alphaproteobacteria | Rhizobiales      | Bartonellaceae      |                  | 0.20%  | -    | 4.38   | -18.29 | 27.05 | 0.70 | 1.00 | 3.67   | -18.45 | 25.79 | 0.75 | 1.00 | 5.22   | -9.35  | 19.79 | 0.48 | 0.95 | 4.75   | -9.36  | 18.87 | 0.51 | 0.96 | Yes |
| Bacteria | Proteobacteria | Alphaproteobacteria | Rhizobiales      | Beijerinckiaceae    | Other            | 0.30%  | -    | 18.40  | -0.11  | 36.91 | 0.05 | 0.99 | 16.68  | -1.39  | 34.75 | 0.07 | 1.00 | 2.62   | -9.30  | 14.54 | 0.67 | 0.95 | 1.42   | -10.14 | 12.97 | 0.81 | 0.97 | Yes |
| Bacteria | Proteobacteria | Alphaproteobacteria | Rhizobiales      | Beijerinckiaceae    |                  | 1.89%  | -    | -2.90  | -10.39 | 4.58  | 0.45 | 1.00 | -3.57  | -10.88 | 3.73  | 0.34 | 1.00 | -1.58  | -6.39  | 3.23  | 0.52 | 0.95 | -2.04  | -6.70  | 2.63  | 0.39 | 0.96 | Yes |
| Bacteria | Proteobacteria | Alphaproteobacteria | Rhizobiales      | Bradyrhizobiaceae   | Balneimonas      | 1.10%  | -    | 2.77   | -6.99  | 12.54 | 0.58 | 1.00 | 1.93   | -7.61  | 11.46 | 0.69 | 1.00 | -3.39  | -9.67  | 2.88  | 0.29 | 0.95 | -3.98  | -10.06 | 2.10  | 0.20 | 0.96 | Yes |
| Bacteria | Proteobacteria | Alphaproteobacteria | Rhizobiales      | Bradyrhizobiaceae   | Bosea            | 0.30%  | -    | 0.22   | -18.21 | 18.65 | 0.98 | 1.00 | -1.33  | -19.32 | 16.65 | 0.88 | 1.00 | 1.62   | -10.23 | 13.47 | 0.79 | 0.96 | 0.52   | -10.97 | 12.00 | 0.93 | 0.99 | Yes |
| Bacteria | Proteobacteria | Alphaproteobacteria | Rhizobiales      | Bradyrhizobiaceae   | Bradyrhizobium   | 0.50%  | -    | 3.59   | -10.84 | 18.02 | 0.63 | 1.00 | 4.56   | -9.51  | 18.64 | 0.52 | 1.00 | 5.82   | -3.44  | 15.09 | 0.22 | 0.95 | 6.51   | -2.47  | 15.49 | 0.16 | 0.96 | Yes |
| Bacteria | Proteobacteria | Alphaproteobacteria | Rhizobiales      | Bradyrhizobiaceae   |                  | 0.19   | 0.33 | 4.04   | 0.94   | 7.15  | 0.01 | 0.99 | 3.67   | 0.63   | 6.70  | 0.02 | 1.00 | 2.52   | 0.52   | 4.51  | 0.01 | 0.95 | 2.21   | 0.27   | 4.15  | 0.03 | 0.96 | No  |
| Bacteria | Proteobacteria | Alphaproteobacteria | Rhizobiales      | Brucellaceae        | Ochrobactrum     | 4.69%  | -    | -4.07  | -8.88  | 0.75  | 0.10 | 1.00 | -4.18  | -8.88  | 0.52  | 0.08 | 1.00 | -3.17  | -6.27  | -0.08 | 0.04 | 0.95 | -3.24  | -6.24  | -0.24 | 0.03 | 0.96 | Yes |
| Bacteria | Proteobacteria | Alphaproteobacteria | Rhizobiales      | Brucellaceae        | Other            | 1.40%  | -    | -0.57  | -9.28  | 8.14  | 0.90 | 1.00 | 0.79   | -7.71  | 9.30  | 0.85 | 1.00 | -1.25  | -6.85  | 4.35  | 0.66 | 0.95 | -0.28  | -5.71  | 5.15  | 0.92 | 0.99 | Yes |
| Bacteria | Proteobacteria | Alphaproteobacteria | Rhizobiales      | Brucellaceae        |                  | 0.90%  | -    | -12.65 | -23.34 | -1.96 | 0.02 | 0.99 | -13.83 | -24.26 | -3.40 | 0.01 | 1.00 | -10.43 | -17.29 | -3.57 | 0.00 | 0.95 | -11.27 | -17.91 | -4.62 | 0.00 | 0.30 | Yes |
| Bacteria | Proteobacteria | Alphaproteobacteria | Rhizobiales      | Hyphomicrobiaceae   | Devosia          | 9.67%  | -    | 1.03   | -2.45  | 4.52  | 0.56 | 1.00 | 1.42   | -1.98  | 4.83  | 0.41 | 1.00 | -0.39  | -2.63  | 1.85  | 0.73 | 0.96 | -0.10  | -2.27  | 2.07  | 0.93 | 0.99 | Yes |
| Bacteria | Proteobacteria | Alphaproteobacteria | Rhizobiales      | Hyphomicrobiaceae   | Hyphomicrobium   | 3.49%  | -    | 2.23   | -3.30  | 7.77  | 0.43 | 1.00 | 2.24   | -3.16  | 7.65  | 0.42 | 1.00 | -1.64  | -5.20  | 1.92  | 0.37 | 0.95 | -1.61  | -5.06  | 1.84  | 0.36 | 0.96 | Yes |
| Bacteria | Proteobacteria | Alphaproteobacteria | Rhizobiales      | Hyphomicrobiaceae   | Other            | 0.20%  | -    | -12.60 | -35.30 | 10.09 | 0.28 | 1.00 | -13.66 | -35.80 | 8.48  | 0.23 | 1.00 | -6.27  | -20.86 | 8.33  | 0.40 | 0.95 | -6.99  | -21.13 | 7.15  | 0.33 | 0.96 | Yes |
| Bacteria | Proteobacteria | Alphaproteobacteria | Rhizobiales      | Hyphomicrobiaceae   | Pedomicrobium    | 0.40%  | -    | -10.84 | -26.94 | 5.26  | 0.19 | 1.00 | -12.22 | -27.93 | 3.48  | 0.13 | 1.00 | -3.61  | -13.97 | 6.74  | 0.49 | 0.95 | -4.58  | -14.61 | 5.46  | 0.37 | 0.96 | Yes |
| Bacteria | Proteobacteria | Alphaproteobacteria | Rhizobiales      | Hyphomicrobiaceae   | Rhodoplanes      | 3.89%  | -    | 0.27   | -4.98  | 5.53  | 0.92 | 1.00 | 0.15   | -4.98  | 5.27  | 0.96 | 1.00 | 1.85   | -1.53  | 5.22  | 0.28 | 0.95 | 1.77   | -1.50  | 5.04  | 0.29 | 0.96 | Yes |
| Bacteria | Proteobacteria | Alphaproteobacteria | Rhizobiales      | Hyphomicrobiaceae   |                  | 2.39%  | -    | -0.98  | -7.70  | 5.74  | 0.78 | 1.00 | -2.00  | -8.56  | 4.56  | 0.55 | 1.00 | -1.22  | -5.54  | 3.10  | 0.58 | 0.95 | -1.93  | -6.11  | 2.26  | 0.37 | 0.96 | Yes |
| Bacteria | Proteobacteria | Alphaproteobacteria | Rhizobiales      | Methylobacteriaceae | Methylobacterium | 5.18%  | -    | 0.51   | -4.10  | 5.11  | 0.83 | 1.00 | 0.45   | -4.05  | 4.94  | 0.85 | 1.00 | -0.64  | -3.60  | 2.32  | 0.67 | 0.95 | -0.67  | -3.54  | 2.20  | 0.65 | 0.96 | Yes |
| Bacteria | Proteobacteria | Alphaproteobacteria | Rhizobiales      | Methylobacteriaceae |                  | 5.08%  | -    | 0.85   | -3.77  | 5.48  | 0.72 | 1.00 | 0.44   | -4.08  | 4.95  | 0.85 | 1.00 | 1.52   | -1.45  | 4.49  | 0.32 | 0.95 | 1.24   | -1.64  | 4.12  | 0.40 | 0.96 | Yes |
| Bacteria | Proteobacteria | Alphaproteobacteria | Rhizobiales      | Methylocystaceae    | Methylopila      | 0.40%  | -    | 2.37   | -13.67 | 18.41 | 0.77 | 1.00 | 0.73   | -14.93 | 16.38 | 0.93 | 1.00 | 1.98   | -8.33  | 12.29 | 0.71 | 0.95 | 0.83   | -9.16  | 10.83 | 0.87 | 0.98 | Yes |
| Bacteria | Proteobacteria | Alphaproteobacteria | Rhizobiales      | Methylocystaceae    | Methylosinus     | 0.80%  | -    | 3.18   | -8.24  | 14.60 | 0.59 | 1.00 | 3.03   | -8.11  | 14.18 | 0.59 | 1.00 | -0.49  | -7.83  | 6.85  | 0.90 | 0.97 | -0.59  | -7.70  | 6.53  | 0.87 | 0.98 | Yes |
| Bacteria | Proteobacteria | Alphaproteobacteria | Rhizobiales      | Methylocystaceae    | Other            | 1.00%  | -    | 4.19   | -5.97  | 14.35 | 0.42 | 1.00 | 6.00   | -3.93  | 15.92 | 0.24 | 1.00 | 0.19   | -6.35  | 6.72  | 0.95 | 0.98 | 1.49   | -4.85  | 7.83  | 0.64 | 0.96 | Yes |
| Bacteria | Proteobacteria | Alphaproteobacteria | Rhizobiales      | Methylocystaceae    | Pleomorphomonas  | 1.10%  | -    | 3.73   | -5.99  | 13.45 | 0.45 | 1.00 | 3.05   | -6.44  | 12.54 | 0.53 | 1.00 | 0.14   | -6.11  | 6.40  | 0.96 | 0.98 | -0.34  | -6.40  | 5.72  | 0.91 | 0.99 | Yes |
| Bacteria | Proteobacteria | Alphaproteobacteria | Rhizobiales      | Methylocystaceae    |                  | 0.30%  | -    | -18.20 | -36.69 | 0.28  | 0.05 | 0.99 | -17.53 | -35.57 | 0.50  | 0.06 | 1.00 | -12.81 | -24.69 | -0.94 | 0.03 | 0.95 | -12.31 | -23.82 | -0.80 | 0.04 | 0.96 | Yes |
| Bacteria | Proteobacteria | Alphaproteobacteria | Rhizobiales      | Other               | Other            | 11.37% | -    | 1.17   | -2.05  | 4.39  | 0.47 | 1.00 | 1.12   | -2.02  | 4.    |      |      |        |        |       |      |      |        |        |       |      |      |     |



|          |                |                     |                  |                    |                 |        |      |        |        |       |      |      |        |        |       |      |      |        |        |       |      |      |        |        |       |      |      |     |
|----------|----------------|---------------------|------------------|--------------------|-----------------|--------|------|--------|--------|-------|------|------|--------|--------|-------|------|------|--------|--------|-------|------|------|--------|--------|-------|------|------|-----|
| Bacteria | Proteobacteria | Alphaproteobacteria | Rhodobacterales  | Rhodobacteraceae   |                 | 22.33% | -    | 0.23   | -2.26  | 2.72  | 0.86 | 1.00 | 0.01   | -2.43  | 2.44  | 1.00 | 1.00 | 0.76   | -0.84  | 2.36  | 0.35 | 0.95 | 0.57   | -0.99  | 2.12  | 0.48 | 0.96 | Yes |
| Bacteria | Proteobacteria | Alphaproteobacteria | Rhodospirillales | Acetobacteraceae   | Acetobacter     | 2.89%  | -    | 0.14   | -5.94  | 6.23  | 0.96 | 1.00 | -0.32  | -6.26  | 5.61  | 0.91 | 1.00 | 1.96   | -1.95  | 5.87  | 0.33 | 0.95 | 1.65   | -2.14  | 5.44  | 0.39 | 0.96 | Yes |
| Bacteria | Proteobacteria | Alphaproteobacteria | Rhodospirillales | Acetobacteraceae   | Gluconobacter   | 0.60%  | -    | -4.92  | -18.05 | 8.20  | 0.46 | 1.00 | -5.31  | -18.12 | 7.49  | 0.42 | 1.00 | -1.40  | -9.84  | 7.04  | 0.74 | 0.96 | -1.68  | -9.85  | 6.50  | 0.69 | 0.96 | Yes |
| Bacteria | Proteobacteria | Alphaproteobacteria | Rhodospirillales | Acetobacteraceae   | Other           | 0.80%  | -    | 1.36   | -10.20 | 12.91 | 0.82 | 1.00 | 1.42   | -9.86  | 12.70 | 0.80 | 1.00 | -0.79  | -8.22  | 6.64  | 0.83 | 0.96 | -0.72  | -7.92  | 6.48  | 0.84 | 0.98 | Yes |
| Bacteria | Proteobacteria | Alphaproteobacteria | Rhodospirillales | Acetobacteraceae   | Roseococcus     | 0.40%  | -    | -1.10  | -17.23 | 15.04 | 0.89 | 1.00 | -0.30  | -16.04 | 15.45 | 0.97 | 1.00 | 5.80   | -4.56  | 16.17 | 0.27 | 0.95 | 6.39   | -3.65  | 16.44 | 0.21 | 0.96 | Yes |
| Bacteria | Proteobacteria | Alphaproteobacteria | Rhodospirillales | Acetobacteraceae   | Roseomonas      | 0.40%  | -    | -4.63  | -20.64 | 11.38 | 0.57 | 1.00 | -3.21  | -18.83 | 12.42 | 0.69 | 1.00 | -2.50  | -12.79 | 7.79  | 0.63 | 0.95 | -1.47  | -11.44 | 8.51  | 0.77 | 0.97 | Yes |
| Bacteria | Proteobacteria | Alphaproteobacteria | Rhodospirillales | Acetobacteraceae   |                 | 10.07% | -    | -1.85  | -5.20  | 1.50  | 0.28 | 1.00 | -1.67  | -4.93  | 1.60  | 0.32 | 1.00 | -0.26  | -2.42  | 1.89  | 0.81 | 0.96 | -0.12  | -2.21  | 1.96  | 0.91 | 0.99 | Yes |
| Bacteria | Proteobacteria | Alphaproteobacteria | Rhodospirillales | Rhodospirillaceae  | Azospirillum    | 1.00%  | -    | 2.58   | -7.60  | 12.75 | 0.62 | 1.00 | 1.90   | -8.03  | 11.83 | 0.71 | 1.00 | -3.72  | -10.26 | 2.81  | 0.26 | 0.95 | -4.20  | -10.53 | 2.14  | 0.19 | 0.96 | Yes |
| Bacteria | Proteobacteria | Alphaproteobacteria | Rhodospirillales | Rhodospirillaceae  | Inquilinus      | 0.20%  | -    | -12.60 | -35.30 | 10.09 | 0.28 | 1.00 | -13.66 | -35.80 | 8.48  | 0.23 | 1.00 | -6.27  | -20.86 | 8.33  | 0.40 | 0.95 | -6.99  | -21.13 | 7.15  | 0.33 | 0.96 | Yes |
| Bacteria | Proteobacteria | Alphaproteobacteria | Rhodospirillales | Rhodospirillaceae  | Other           | 0.40%  | -    | 2.35   | -13.69 | 18.39 | 0.77 | 1.00 | 0.68   | -14.98 | 16.34 | 0.93 | 1.00 | -0.30  | -10.61 | 10.01 | 0.95 | 0.98 | -1.48  | -11.47 | 8.52  | 0.77 | 0.97 | Yes |
| Bacteria | Proteobacteria | Alphaproteobacteria | Rhodospirillales | Rhodospirillaceae  | Phaeospirillum  | 0.10%  | -    | -9.17  | -41.17 | 22.83 | 0.57 | 1.00 | -2.70  | -33.97 | 28.58 | 0.87 | 1.00 | -8.85  | -29.42 | 11.72 | 0.40 | 0.95 | -4.19  | -24.16 | 15.77 | 0.68 | 0.96 | Yes |
| Bacteria | Proteobacteria | Alphaproteobacteria | Rhodospirillales | Rhodospirillaceae  | Skermanella     | 1.20%  | -    | 5.16   | -4.15  | 14.47 | 0.28 | 1.00 | 4.77   | -4.71  | 14.25 | 0.32 | 1.00 | -1.84  | -7.83  | 4.14  | 0.55 | 0.95 | -3.33  | -9.38  | 2.72  | 0.28 | 0.96 | Yes |
| Bacteria | Proteobacteria | Alphaproteobacteria | Rhodospirillales | Rhodospirillaceae  |                 | 6.88%  | -    | -1.16  | -5.24  | 2.91  | 0.58 | 1.00 | -2.08  | -6.07  | 1.90  | 0.31 | 1.00 | -0.79  | -3.41  | 1.84  | 0.56 | 0.95 | -1.43  | -3.97  | 1.11  | 0.27 | 0.96 | Yes |
| Bacteria | Proteobacteria | Alphaproteobacteria | Rhodospirillales | Rhodospirillaceae  |                 | 1.40%  | -    | -2.80  | -11.45 | 5.85  | 0.53 | 1.00 | -2.40  | -10.84 | 6.05  | 0.58 | 1.00 | -2.17  | -7.73  | 3.39  | 0.44 | 0.95 | -1.86  | -7.25  | 3.53  | 0.50 | 0.96 | Yes |
| Bacteria | Proteobacteria | Alphaproteobacteria | Rickettsiales    | mitochondria       | Other           | 16.15% | -    | 3.16   | 0.41   | 5.92  | 0.02 | 0.99 | 3.41   | 0.73   | 6.10  | 0.01 | 1.00 | 1.39   | -0.39  | 3.16  | 0.13 | 0.95 | 1.58   | -0.14  | 3.30  | 0.07 | 0.96 | Yes |
| Bacteria | Proteobacteria | Alphaproteobacteria | Rickettsiales    | Pelagibacteraceae  |                 | 0.40%  | -    | -3.66  | -19.76 | 12.45 | 0.66 | 1.00 | -1.60  | -17.33 | 14.12 | 0.84 | 1.00 | 2.83   | -7.53  | 13.18 | 0.59 | 0.95 | 4.35   | -5.69  | 14.39 | 0.40 | 0.96 | Yes |
| Bacteria | Proteobacteria | Alphaproteobacteria | Rickettsiales    | Rickettsiaceae     | Wolbachia       | 4.29%  | -    | -5.11  | -10.14 | -0.07 | 0.05 | 0.99 | -4.56  | -9.47  | 0.36  | 0.07 | 1.00 | -2.71  | -5.94  | 0.53  | 0.10 | 0.95 | -2.31  | -5.45  | 0.83  | 0.15 | 0.96 | Yes |
| Bacteria | Proteobacteria | Alphaproteobacteria | Rickettsiales    |                    |                 | 0.40%  | -    | 11.77  | -4.24  | 27.79 | 0.15 | 1.00 | 12.79  | -2.83  | 28.42 | 0.11 | 1.00 | 8.10   | -2.19  | 18.40 | 0.12 | 0.95 | 8.84   | -1.13  | 18.82 | 0.08 | 0.96 | Yes |
| Bacteria | Proteobacteria | Alphaproteobacteria | Sphingomonadales | Erythrobacteraceae | Erythrobacter   | 2.49%  | -    | 6.04   | -0.47  | 12.56 | 0.07 | 0.99 | 6.25   | -0.10  | 12.61 | 0.05 | 1.00 | 1.13   | -3.07  | 5.32  | 0.60 | 0.95 | 1.28   | -2.78  | 5.35  | 0.54 | 0.96 | Yes |
| Bacteria | Proteobacteria | Alphaproteobacteria | Sphingomonadales | Erythrobacteraceae | Other           | 0.30%  | -    | -19.65 | -38.14 | -1.16 | 0.04 | 0.99 | -19.33 | -37.37 | -1.29 | 0.04 | 1.00 | -9.74  | -21.64 | 2.15  | 0.11 | 0.95 | -9.47  | -21.00 | 2.05  | 0.11 | 0.96 | Yes |
| Bacteria | Proteobacteria | Alphaproteobacteria | Sphingomonadales | Erythrobacteraceae |                 | 5.08%  | -    | -0.03  | -4.65  | 4.60  | 0.99 | 1.00 | 0.04   | -4.48  | 4.56  | 0.99 | 1.00 | 1.30   | -1.67  | 4.27  | 0.39 | 0.95 | 1.36   | -1.52  | 4.24  | 0.35 | 0.96 | Yes |
| Bacteria | Proteobacteria | Alphaproteobacteria | Sphingomonadales | Sphingomonadaceae  | Kaistobacter    | 3.69%  | -    | -1.70  | -7.19  | 3.79  | 0.54 | 1.00 | -1.90  | -7.25  | 3.46  | 0.49 | 1.00 | -3.38  | -6.91  | 0.14  | 0.06 | 0.95 | -3.50  | -6.91  | -0.09 | 0.04 | 0.96 | Yes |
| Bacteria | Proteobacteria | Alphaproteobacteria | Sphingomonadales | Sphingomonadaceae  | Novosphingobium | 4.09%  | -    | 1.28   | -3.88  | 6.44  | 0.63 | 1.00 | 0.42   | -4.62  | 5.46  | 0.87 | 1.00 | 0.52   | -2.80  | 3.84  | 0.76 | 0.96 | -0.07  | -3.29  | 3.14  | 0.96 | 0.99 | Yes |
| Bacteria | Proteobacteria | Alphaproteobacteria | Sphingomonadales | Sphingomonadaceae  | Other           | 1.89%  | -    | 6.22   | -1.25  | 13.69 | 0.10 | 1.00 | 6.11   | -1.18  | 13.40 | 0.10 | 1.00 | 4.62   | -0.18  | 9.42  | 0.06 | 0.95 | 4.56   | -0.09  | 9.21  | 0.05 | 0.96 | Yes |
| Bacteria | Proteobacteria | Alphaproteobacteria | Sphingomonadales | Sphingomonadaceae  | Sphingobium     | 1.99%  | -    | -0.35  | -7.67  | 6.97  | 0.93 | 1.00 | -1.60  | -8.75  | 5.55  | 0.66 | 1.00 | 0.68   | -4.03  | 5.38  | 0.78 | 0.96 | -0.20  | -4.76  | 4.37  | 0.93 | 0.99 | Yes |
| Bacteria | Proteobacteria | Alphaproteobacteria | Sphingomonadales | Sphingomonadaceae  | Sphingomonas    | 21.04% | -    | 2.22   | -0.30  | 4.73  | 0.08 | 0.99 | 1.99   | -0.46  | 4.45  | 0.11 | 1.00 | 0.83   | -0.79  | 2.45  | 0.31 | 0.95 | 0.69   | -0.88  | 2.26  | 0.39 | 0.96 | Yes |
| Bacteria | Proteobacteria | Alphaproteobacteria | Sphingomonadales | Sphingomonadaceae  | Sphingopyxis    | 2.89%  | -    | -5.56  | -11.58 | 0.46  | 0.07 | 0.99 | -4.99  | -10.86 | 0.89  | 0.10 | 1.00 | -3.65  | -7.52  | 0.22  | 0.06 | 0.95 | -3.24  | -6.99  | 0.51  | 0.09 | 0.96 | Yes |
| Bacteria | Proteobacteria | Alphaproteobacteria | Sphingomonadales | Sphingomonadaceae  |                 | 8.57%  | -    | -0.58  | -4.21  | 3.05  | 0.75 | 1.00 | -0.58  | -4.12  | 2.96  | 0.75 | 1.00 | -0.66  | -2.99  | 1.67  | 0.58 | 0.95 | -0.65  | -2.91  | 1.61  | 0.57 | 0.96 | Yes |
| Bacteria | Proteobacteria | Alphaproteobacteria | Sphingomonadales |                    |                 | 0.70%  | -    | -13.58 | -25.65 | -1.50 | 0.03 | 0.99 | -13.56 | -25.34 | -1.78 | 0.02 | 1.00 | -9.64  | -17.40 | -1.88 | 0.01 | 0.95 | -9.61  | -17.13 | -2.09 | 0.01 | 0.96 | Yes |
| Bacteria | Proteobacteria | Alphaproteobacteria |                  |                    |                 | 2.49%  | -    | -1.84  | -8.34  | 4.65  | 0.58 | 1.00 | -1.24  | -7.58  | 5.10  | 0.70 | 1.00 | -3.17  | -7.34  | 1.00  | 0.14 | 0.95 | -2.73  | -6.77  | 1.32  | 0.19 | 0.96 | Yes |
| Bacteria | Proteobacteria | Betaproteobacteria  | A21b             | EB1003             |                 | 0.40%  | -    | 6.58   | -9.64  | 22.81 | 0.43 | 1.00 | 2.40   | -13.48 | 18.28 | 0.77 | 1.00 | -1.16  | -11.59 | 9.28  | 0.83 | 0.96 | -4.18  | -14.31 | 5.95  | 0.42 | 0.96 | Yes |
| Bacteria | Proteobacteria | Betaproteobacteria  | A21b             | UD5                |                 | 0.10%  | -    | -14.35 | -46.50 | 17.81 | 0.38 | 1.00 | -13.76 | -45.13 | 17.62 | 0.39 | 1.00 | -13.51 | -34.17 | 7.16  | 0.20 | 0.95 | -13.08 | -33.10 | 6.94  | 0.20 | 0.96 | Yes |
| Bacteria | Proteobacteria | Betaproteobacteria  | ASSO-13          |                    |                 | 2.79%  | -    | 2.46   | -3.70  | 8.62  | 0.43 | 1.00 | 2.19   | -3.83  | 8.20  | 0.48 | 1.00 | -0.81  | -4.77  | 3.15  | 0.69 | 0.95 | -1.00  | -4.84  | 2.84  | 0.61 | 0.96 | Yes |
| Bacteria | Proteobacteria | Betaproteobacteria  | Burkholderiales  | Alcaligenaceae     | Achromobacter   | 14.46% | -    | 3.32   | 0.44   | 6.19  | 0.02 | 0.99 | 3.25   | 0.44   | 6.05  | 0.02 | 1.00 | 1.88   | 0.03   | 3.73  | 0.05 | 0.95 | 1.84   | 0.05   | 3.64  | 0.04 | 0.96 | Yes |
| Bacteria | Proteobacteria | Betaproteobacteria  | Burkholderiales  | Alcaligenaceae     | Oligella        | 3.49%  | -    | -0.99  | -6.65  | 4.68  | 0.73 | 1.00 | 0.37   | -5.17  | 5.90  | 0.90 | 1.00 | -0.54  | -4.18  | 3.10  | 0.77 | 0.96 | 0.43   | -3.11  | 3.96  | 0.81 | 0.97 | Yes |
| Bacteria | Proteobacteria | Betaproteobacteria  | Burkholderiales  | Alcaligenaceae     | Other           | 0.80%  | -    | -5.53  | -16.92 | 5.86  | 0.34 | 1.00 | -4.43  | -15.54 | 6.69  | 0.44 | 1.00 | -3.29  | -10.62 | 4.03  | 0.38 | 0.95 | -2.49  | -9.59  | 4.61  | 0.49 | 0.96 | Yes |
| Bacteria | Proteobacteria | Betaproteobacteria  | Burkholderiales  | Alcaligenaceae     | Sutterella      | 0.53   | 0.47 | 1.91   | -0.27  | 4.08  | 0.09 | 1.00 | 1.60   | -0.54  | 3.74  | 0.14 | 1.00 | 0.23   | -1.17  | 1.63  | 0.75 | 0.96 | -0.04  | -1.41  | 1.33  | 0.96 | 0.99 | No  |
| Bacteria | Proteobacteria | Betaproteobacteria  | Burkholderiales  | Alcaligenaceae     |                 | 4.59%  | -    | -4.37  | -9.30  | 0.57  | 0.08 | 0.99 | -2.88  | -7.71  | 1.96  | 0.24 | 1.00 | -4.06  | -7.23  | -0.90 | 0.01 | 0.95 | -2.99  | -6.08  | 0.09  | 0.06 | 0.96 | Yes |
| Bacteria | Proteobacteria | Betaproteobacteria  | Burkholderiales  | Burkholderiaceae   | Burkholderia    | 8.57%  | -    | 1.49   | -2.16  | 5.14  | 0.42 | 1.00 | 1.63   | -1.93  | 5.20  | 0.37 | 1.00 | 0.92   | -1.43  | 3.26  | 0.44 | 0.95 | 1.03   | -1.25  | 3.30  | 0.38 | 0.96 | Yes |
| Bacteria | Proteobacteria | Betaproteobacteria  | Burkholderiales  | Burkholderiaceae   | Lautropia       | 7.48%  | -    | 1.02   | -2.87  | 4.90  | 0.61 | 1.00 | -0.03  | -3.83  | 3.77  | 0.99 | 1.00 | -0.72  | -3.22  | 1.78  | 0.57 | 0.95 | -1.46  | -3.89  | 0.96  | 0.24 | 0.96 | Yes |
| Bacteria | Proteobacteria | Betaproteobacteria  | Burkholderiales  | Burkholderiaceae   | Pandoraea       | 0.40%  | -    | -4.97  | -20.97 | 11.03 | 0.54 | 1.00 | -6.66  | -22.27 | 8.96  | 0.40 | 1.00 | 2.42   | -7.86  | 12.71 | 0.64 | 0.95 | 1.22   | -8.75  | 11.19 | 0.81 | 0.97 | Yes |
| Bacteria | Proteobacteria | Betaproteobacteria  | Burkholderiales  | Burkholderiaceae   | Salinispora     | 0.20%  | -    | 20.06  | -2.53  | 42.66 | 0.08 | 0.99 | 20.98  | -1.06  | 43.01 | 0.06 | 1.00 | 5.76   | -8.78  | 20.30 | 0.44 | 0.95 | 6.40   | -7.69  | 20.49 | 0.37 | 0.96 | Yes |
| Bacteria | Proteobacteria | Betaproteobacteria  | Burkholderiales  | Burkholderiaceae   |                 | 1.30%  | -    | 0.84   | -8.12  | 9.81  | 0.85 | 1.00 | 0.30   | -8.45  | 9.05  | 0.95 | 1.00 | 2.35   | -3.41  | 8.11  | 0.42 | 0.95 | 1.98   | -3.60  | 7.57  | 0.49 | 0.96 | Yes |
| Bacteria | Proteobacteria | Betaproteobacteria  | Burkholderiales  | Comamonadaceae     | Azohydromonas   | 0.40%  | -    | 17.64  | 1.63   | 33.64 | 0.03 | 0.99 | 17.01  | 1.40   | 32.63 | 0.03 | 1.00 | 7.94   | -2.36  | 18.24 | 0.13 | 0.95 | 7.50   | -2.48  | 17.48 | 0.14 | 0.96 | Yes |
| Bacteria | Proteobacteria | Betaproteobacteria  | Burkholderiales  | Comamonadaceae     | Brachymonas     | 0.20%  | -    | -5.87  | -28.55 | 16.81 | 0.61 | 1.00 | -7.34  | -29.47 | 14.79 | 0.52 | 1.00 | 1.62   | -12.96 | 16.20 | 0.83 | 0.96 | 0.62   | -13.51 | 14.76 | 0.93 | 0.99 | Yes |
| Bacteria | Proteobacteria | Betaproteobacteria  | Burkholderiales  | Comamonadaceae     | Comamonas       | 24.03% | -    | 1.18   | -1.23  | 3.59  | 0.34 | 1.00 | 1.15   | -1.20  | 3.50  | 0.34 | 1.00 | 0.02   | -1.53  | 1.57  | 0.98 | 0.99 | 0.01   | -1.49  | 1.51  | 0.99 | 1.00 | Yes |
| Bacteria | Proteobacteria | Betaproteobacteria  | Burkholderiales  | Comamonadaceae     | Delftia         | 0.57   | 0.70 | 0.19   | -1.32  | 1.69  | 0.81 | 1.00 | 0.28   | -1.19  | 1.75  | 0.71 | 1.00 | 0.16   | -0.81  | 1.13  | 0.75 | 0.96 | 0.24   | -0.70  | 1.18  | 0.62 | 0.96 | No  |
| Bacteria | Proteobacteria | Betaproteobacteria  | Burkholderiales  | Comamonadaceae     | Hydrogenophaga  | 6.18%  | -    | 1.72   | -2.49  | 5.93  | 0.42 | 1.00 | 2.29   | -1.82  | 6.40  | 0.27 | 1.0  |        |        |       |      |      |        |        |       |      |      |     |

|          |                |                     |                    |                     |                           |        |      |        |        |       |      |      |        |        |       |      |      |         |        |       |      |      |       |        |       |      |      |     |
|----------|----------------|---------------------|--------------------|---------------------|---------------------------|--------|------|--------|--------|-------|------|------|--------|--------|-------|------|------|---------|--------|-------|------|------|-------|--------|-------|------|------|-----|
| Bacteria | Proteobacteria | Betaproteobacteria  | Neisseriales       | Neisseriaceae       | Kingella                  | 0.60%  | -    | 5.69   | -7.41  | 18.79 | 0.39 | 1.00 | 3.69   | -9.11  | 16.48 | 0.57 | 1.00 | 4.47    | -3.95  | 12.89 | 0.30 | 0.95 | 3.04  | -5.12  | 11.21 | 0.46 | 0.96 | Yes |
| Bacteria | Proteobacteria | Betaproteobacteria  | Neisseriales       | Neisseriaceae       | Microvirgula              | 0.90%  | -    | 8.40   | -2.36  | 19.16 | 0.13 | 1.00 | 8.31   | -2.19  | 18.81 | 0.12 | 1.00 | 1.27    | -5.65  | 8.20  | 0.72 | 0.96 | 1.22  | -5.49  | 7.93  | 0.72 | 0.97 | Yes |
| Bacteria | Proteobacteria | Betaproteobacteria  | Neisseriales       | Neisseriaceae       | Neisseria                 | 20.24% | -    | -0.27  | -2.80  | 2.27  | 0.84 | 1.00 | -0.39  | -2.86  | 2.08  | 0.76 | 1.00 | -1.75   | -3.38  | -0.13 | 0.03 | 0.95 | -1.83 | -3.40  | -0.26 | 0.02 | 0.96 | Yes |
| Bacteria | Proteobacteria | Betaproteobacteria  | Neisseriales       | Neisseriaceae       | Other                     | 0.10%  | -    | 14.68  | -17.27 | 46.63 | 0.37 | 1.00 | 9.84   | -21.36 | 41.05 | 0.54 | 1.00 | 23.02   | 2.53   | 43.52 | 0.03 | 0.95 | 19.57 | -0.31  | 39.46 | 0.05 | 0.96 | Yes |
| Bacteria | Proteobacteria | Betaproteobacteria  | Neisseriales       | Neisseriaceae       | Vogesella                 | 0.30%  | -    | 0.21   | -18.27 | 18.70 | 0.98 | 1.00 | -1.55  | -19.59 | 16.49 | 0.87 | 1.00 | -7.03   | -18.90 | 4.85  | 0.25 | 0.95 | -8.29 | -19.80 | 3.21  | 0.16 | 0.96 | Yes |
| Bacteria | Proteobacteria | Betaproteobacteria  | Neisseriales       | Neisseriaceae       |                           | 5.68%  | -    | 0.09   | -4.34  | 4.52  | 0.97 | 1.00 | 0.37   | -3.96  | 4.69  | 0.87 | 1.00 | -1.14   | -3.99  | 1.70  | 0.43 | 0.95 | -0.94 | -3.69  | 1.82  | 0.51 | 0.96 | Yes |
| Bacteria | Proteobacteria | Betaproteobacteria  | Nitrosomonadales   | Nitrosomonadaceae   |                           | 1.60%  | -    | -4.89  | -12.99 | 3.21  | 0.24 | 1.00 | -5.25  | -13.15 | 2.66  | 0.19 | 1.00 | -2.42   | -7.63  | 2.79  | 0.36 | 0.95 | -2.66 | -7.71  | 2.38  | 0.30 | 0.96 | Yes |
| Bacteria | Proteobacteria | Betaproteobacteria  | Other              | Other               | Other                     | 1.20%  | -    | 0.23   | -9.07  | 9.54  | 0.96 | 1.00 | 0.13   | -8.95  | 9.21  | 0.98 | 1.00 | -1.89   | -7.87  | 4.09  | 0.54 | 0.95 | -1.95 | -7.74  | 3.85  | 0.51 | 0.96 | Yes |
| Bacteria | Proteobacteria | Betaproteobacteria  | Procabacteriales   | Procabacteriaceae   |                           | 0.20%  | -    | 0.31   | -22.32 | 22.95 | 0.98 | 1.00 | -0.43  | -22.51 | 21.66 | 0.97 | 1.00 | 5.25    | -9.30  | 19.80 | 0.48 | 0.95 | 4.75  | -9.34  | 18.85 | 0.51 | 0.96 | Yes |
| Bacteria | Proteobacteria | Betaproteobacteria  | Rhodocyclales      | Rhodocyclaceae      | C39                       | 0.80%  | -    | 5.91   | -5.53  | 17.34 | 0.31 | 1.00 | 5.87   | -5.29  | 17.03 | 0.30 | 1.00 | -1.10   | -8.46  | 6.26  | 0.77 | 0.96 | -1.12 | -8.25  | 6.00  | 0.76 | 0.97 | Yes |
| Bacteria | Proteobacteria | Betaproteobacteria  | Rhodocyclales      | Rhodocyclaceae      | Candidatus Accumulibacter | 0.40%  | -    | -2.75  | -18.83 | 13.33 | 0.74 | 1.00 | 0.65   | -15.07 | 16.38 | 0.93 | 1.00 | 4.02    | -6.32  | 14.35 | 0.45 | 0.95 | 6.46  | -3.56  | 16.49 | 0.21 | 0.96 | Yes |
| Bacteria | Proteobacteria | Betaproteobacteria  | Rhodocyclales      | Rhodocyclaceae      | Dechloromonas             | 6.78%  | -    | -0.97  | -5.00  | 3.06  | 0.64 | 1.00 | -1.26  | -5.20  | 2.67  | 0.53 | 1.00 | -1.38   | -3.97  | 1.21  | 0.30 | 0.95 | -1.58 | -4.09  | 0.93  | 0.22 | 0.96 | Yes |
| Bacteria | Proteobacteria | Betaproteobacteria  | Rhodocyclales      | Rhodocyclaceae      | Dok59                     | 2.29%  | -    | 7.18   | 0.43   | 13.93 | 0.04 | 0.99 | 5.49   | -1.11  | 12.10 | 0.10 | 1.00 | 3.28    | -1.06  | 7.63  | 0.14 | 0.95 | 2.07  | -2.15  | 6.29  | 0.34 | 0.96 | Yes |
| Bacteria | Proteobacteria | Betaproteobacteria  | Rhodocyclales      | Rhodocyclaceae      | Hydrogenophilus           | 1.69%  | -    | 0.98   | -6.85  | 8.82  | 0.81 | 1.00 | 1.62   | -6.03  | 9.27  | 0.68 | 1.00 | 1.57    | -3.47  | 6.61  | 0.54 | 0.95 | 2.04  | -2.84  | 6.92  | 0.41 | 0.96 | Yes |
| Bacteria | Proteobacteria | Betaproteobacteria  | Rhodocyclales      | Rhodocyclaceae      | K82                       | 0.10%  | -    | 21.50  | -10.39 | 53.39 | 0.19 | 1.00 | 23.04  | -8.08  | 54.15 | 0.15 | 1.00 | -8.43   | -28.94 | 12.08 | 0.42 | 0.95 | -7.32 | -27.20 | 12.56 | 0.47 | 0.96 | Yes |
| Bacteria | Proteobacteria | Betaproteobacteria  | Rhodocyclales      | Rhodocyclaceae      | Methyloversatilis         | 1.69%  | -    | 0.98   | -6.84  | 8.81  | 0.81 | 1.00 | -0.07  | -7.71  | 7.57  | 0.99 | 1.00 | 1.35    | -3.68  | 6.39  | 0.60 | 0.95 | 0.61  | -4.27  | 5.49  | 0.81 | 0.97 | Yes |
| Bacteria | Proteobacteria | Betaproteobacteria  | Rhodocyclales      | Rhodocyclaceae      | Other                     | 3.79%  | -    | 4.71   | -0.58  | 10.01 | 0.08 | 0.99 | 4.48   | -0.69  | 9.64  | 0.09 | 1.00 | -0.45   | -3.86  | 2.95  | 0.79 | 0.96 | -0.61 | -3.91  | 2.69  | 0.72 | 0.97 | Yes |
| Bacteria | Proteobacteria | Betaproteobacteria  | Rhodocyclales      | Rhodocyclaceae      | Propionivibrio            | 0.10%  | -    | -20.56 | -52.47 | 11.35 | 0.21 | 1.00 | -15.32 | -46.50 | 15.86 | 0.34 | 1.00 | 20.77   | 0.28   | 41.26 | 0.05 | 0.95 | 24.61 | 4.76   | 44.46 | 0.02 | 0.96 | Yes |
| Bacteria | Proteobacteria | Betaproteobacteria  | Rhodocyclales      | Rhodocyclaceae      | Sterolibacterium          | 0.20%  | -    | 7.41   | -15.20 | 30.02 | 0.52 | 1.00 | 4.46   | -17.62 | 26.54 | 0.69 | 1.00 | 1.55    | -12.99 | 16.09 | 0.83 | 0.96 | -0.57 | -14.67 | 13.53 | 0.94 | 0.99 | Yes |
| Bacteria | Proteobacteria | Betaproteobacteria  | Rhodocyclales      | Rhodocyclaceae      | Sulfuritalea              | 1.10%  | -    | -1.20  | -10.91 | 8.51  | 0.81 | 1.00 | -2.25  | -11.73 | 7.22  | 0.64 | 1.00 | -0.70   | -6.94  | 5.54  | 0.83 | 0.96 | -1.44 | -7.49  | 4.61  | 0.64 | 0.96 | Yes |
| Bacteria | Proteobacteria | Betaproteobacteria  | Rhodocyclales      | Rhodocyclaceae      | Thauera                   | 4.49%  | -    | 0.73   | -4.14  | 5.59  | 0.77 | 1.00 | 0.60   | -4.15  | 5.35  | 0.80 | 1.00 | 0.54    | -2.59  | 3.67  | 0.74 | 0.96 | 0.46  | -2.57  | 3.49  | 0.77 | 0.97 | Yes |
| Bacteria | Proteobacteria | Betaproteobacteria  | Rhodocyclales      | Rhodocyclaceae      | Zoogloea                  | 12.06% | -    | 0.68   | -2.47  | 3.83  | 0.67 | 1.00 | 0.29   | -2.79  | 3.36  | 0.86 | 1.00 | 0.27    | -1.76  | 2.29  | 0.80 | 0.96 | 0.00  | -1.96  | 1.96  | 1.00 | 1.00 | Yes |
| Bacteria | Proteobacteria | Betaproteobacteria  | Rhodocyclales      | Rhodocyclaceae      |                           | 5.18%  | -    | -1.37  | -5.98  | 3.24  | 0.56 | 1.00 | -1.55  | -6.05  | 2.95  | 0.50 | 1.00 | -0.50   | -3.46  | 2.47  | 0.74 | 0.96 | -0.61 | -3.48  | 2.26  | 0.68 | 0.96 | Yes |
| Bacteria | Proteobacteria | Betaproteobacteria  | SC-I-84            |                     |                           | 3.69%  | -    | -1.53  | -6.95  | 3.90  | 0.58 | 1.00 | -2.35  | -7.64  | 2.94  | 0.38 | 1.00 | -1.59   | -5.07  | 1.90  | 0.37 | 0.95 | -2.16 | -5.54  | 1.22  | 0.21 | 0.96 | Yes |
| Bacteria | Proteobacteria | Betaproteobacteria  | Thiobacterales     | Other               | Other                     | 0.30%  | -    | -3.17  | -21.63 | 15.28 | 0.74 | 1.00 | 0.42   | -17.62 | 18.45 | 0.96 | 1.00 | -1.17   | -13.03 | 10.70 | 0.85 | 0.96 | 1.42  | -10.09 | 12.93 | 0.81 | 0.97 | Yes |
| Bacteria | Proteobacteria | Betaproteobacteria  | Thiobacterales     |                     |                           | 2.49%  | -    | -0.93  | -7.48  | 5.61  | 0.78 | 1.00 | 0.62   | -5.78  | 7.02  | 0.85 | 1.00 | -2.38   | -6.59  | 1.82  | 0.27 | 0.95 | -1.27 | -5.35  | 2.82  | 0.54 | 0.96 | Yes |
| Bacteria | Proteobacteria | Betaproteobacteria  |                    |                     |                           | 2.79%  | -    | -0.83  | -7.05  | 5.38  | 0.79 | 1.00 | -1.78  | -7.84  | 4.29  | 0.57 | 1.00 | -3.90   | -7.89  | 0.09  | 0.06 | 0.95 | -4.56 | -8.42  | -0.70 | 0.02 | 0.96 | Yes |
| Bacteria | Proteobacteria | Deltaproteobacteria | [Entotheonellales] | [Entotheonellaceae] | Candidatus Entothe        | 0.30%  | -    | -8.35  | -26.86 | 10.17 | 0.38 | 1.00 | -6.51  | -24.58 | 11.57 | 0.48 | 1.00 | -7.40   | -19.30 | 4.50  | 0.22 | 0.95 | -6.05 | -17.58 | 5.49  | 0.30 | 0.96 | Yes |
| Bacteria | Proteobacteria | Deltaproteobacteria | Bdellovibrionales  | Bacteriovoracaceae  | Bacteriovorax             | 0.50%  | -    | -5.26  | -19.66 | 9.13  | 0.47 | 1.00 | -2.87  | -16.93 | 11.19 | 0.69 | 1.00 | -1.09   | -10.34 | 8.17  | 0.82 | 0.96 | 0.62  | -8.36  | 9.59  | 0.89 | 0.99 | Yes |
| Bacteria | Proteobacteria | Deltaproteobacteria | Bdellovibrionales  | Bacteriovoracaceae  |                           | 0.10%  | -    | -13.84 | -45.92 | 18.23 | 0.40 | 1.00 | -16.09 | -47.39 | 15.21 | 0.31 | 1.00 | -5.98   | -26.61 | 14.64 | 0.57 | 0.95 | -7.57 | -27.55 | 12.42 | 0.46 | 0.96 | Yes |
| Bacteria | Proteobacteria | Deltaproteobacteria | Bdellovibrionales  | Bdellovibrionaceae  | Bdellovibrio              | 0.80%  | -    | 0.44   | -10.99 | 11.86 | 0.94 | 1.00 | -1.48  | -12.64 | 9.68  | 0.79 | 1.00 | 1.75    | -5.59  | 9.10  | 0.64 | 0.95 | 0.42  | -6.70  | 7.54  | 0.91 | 0.99 | Yes |
| Bacteria | Proteobacteria | Deltaproteobacteria | BPC076             |                     |                           | 0.40%  | -    | -22.88 | -38.85 | -6.92 | 0.01 | 0.99 | -22.04 | -37.62 | -6.46 | 0.01 | 1.00 | -8.12   | -18.42 | 2.17  | 0.12 | 0.95 | -7.50 | -17.48 | 2.47  | 0.14 | 0.96 | Yes |
| Bacteria | Proteobacteria | Deltaproteobacteria | Desulfarculales    | Desulfarculaceae    |                           | 0.10%  | -    | -8.64  | -41.05 | 23.77 | 0.60 | 1.00 | -7.12  | -38.74 | 24.51 | 0.66 | 1.00 | 4.36    | -16.48 | 25.19 | 0.68 | 0.95 | 5.45  | -14.74 | 25.64 | 0.60 | 0.96 | Yes |
| Bacteria | Proteobacteria | Deltaproteobacteria | Desulfobacterales  | Desulfobacteraceae  | Desulfococcus             | 0.40%  | -    | 6.40   | -9.67  | 22.48 | 0.43 | 1.00 | 6.53   | -9.15  | 22.21 | 0.41 | 1.00 | 4.68    | -5.65  | 15.01 | 0.37 | 0.95 | 4.76  | -5.25  | 14.77 | 0.35 | 0.96 | Yes |
| Bacteria | Proteobacteria | Deltaproteobacteria | Desulfobacterales  | Desulfobacteraceae  | Desulfotignum             | 0.10%  | -    | 15.00  | -17.35 | 47.34 | 0.36 | 1.00 | 13.52  | -18.05 | 45.09 | 0.40 | 1.00 | 8.96    | -11.83 | 29.76 | 0.40 | 0.95 | 7.92  | -12.23 | 28.08 | 0.44 | 0.96 | Yes |
| Bacteria | Proteobacteria | Deltaproteobacteria | Desulfobacterales  | Desulfobacteraceae  |                           | 0.70%  | -    | 6.15   | -5.99  | 18.30 | 0.32 | 1.00 | 4.81   | -7.05  | 16.67 | 0.43 | 1.00 | 5.08    | -2.73  | 12.88 | 0.20 | 0.95 | 4.15  | -3.42  | 11.71 | 0.28 | 0.96 | Yes |
| Bacteria | Proteobacteria | Deltaproteobacteria | Desulfobacterales  | Desulfobulbaceae    | Desulfobulbus             | 0.60%  | -    | -6.17  | -19.32 | 6.98  | 0.36 | 1.00 | -6.72  | -19.55 | 6.11  | 0.30 | 1.00 | -0.67   | -9.12  | 7.79  | 0.88 | 0.96 | -1.06 | -9.26  | 7.13  | 0.80 | 0.97 | Yes |
| Bacteria | Proteobacteria | Deltaproteobacteria | Desulfobacterales  | Desulfobulbaceae    |                           | 1.10%  | -    | 1.50   | -8.28  | 11.29 | 0.76 | 1.00 | 1.49   | -8.05  | 11.04 | 0.76 | 1.00 | -0.77   | -7.06  | 5.52  | 0.81 | 0.96 | -0.79 | -6.88  | 5.30  | 0.80 | 0.97 | Yes |
| Bacteria | Proteobacteria | Deltaproteobacteria | Desulfovibrionales | Desulfomicrobiaceae | Desulfomicrobium          | 0.20%  | -    | -0.87  | -23.51 | 21.77 | 0.94 | 1.00 | -1.54  | -23.63 | 20.54 | 0.89 | 1.00 | 1.87    | -12.69 | 16.42 | 0.80 | 0.96 | 1.42  | -12.68 | 15.52 | 0.84 | 0.98 | Yes |
| Bacteria | Proteobacteria | Deltaproteobacteria | Desulfovibrionales | Desulfovibrionaceae | Bilophila                 | 0.15   | 0.25 | 0.48   | -3.62  | 4.58  | 0.82 | 1.00 | 0.58   | -3.46  | 4.63  | 0.78 | 1.00 | -0.25   | -2.89  | 2.38  | 0.85 | 0.96 | -0.24 | -2.82  | 2.34  | 0.85 | 0.98 | No  |
| Bacteria | Proteobacteria | Deltaproteobacteria | Desulfovibrionales | Desulfovibrionaceae | Desulfovibrio             | 0.20   | 0.31 | 0.84   | -2.50  | 4.17  | 0.62 | 1.00 | 0.77   | -2.48  | 4.02  | 0.64 | 1.00 | -0.26   | -2.40  | 1.88  | 0.81 | 0.96 | -0.30 | -2.37  | 1.78  | 0.78 | 0.97 | No  |
| Bacteria | Proteobacteria | Deltaproteobacteria | Desulfovibrionales | Desulfovibrionaceae |                           | 9.07%  | -    | 3.25   | -0.33  | 6.82  | 0.07 | 0.99 | 3.60   | 0.10   | 7.10  | 0.04 | 1.00 | 2.10    | -0.20  | 4.40  | 0.07 | 0.95 | 2.28  | 0.05   | 4.51  | 0.05 | 0.96 | Yes |
| Bacteria | Proteobacteria | Deltaproteobacteria | Desulfuromonadales | Geobacteraceae      | Geobacter                 | 2.59%  | -    | -3.75  | -10.11 | 2.61  | 0.25 | 1.00 | -4.61  | -10.81 | 1.60  | 0.15 | 1.00 | -3.10   | -7.19  | 0.98  | 0.14 | 0.95 | -3.70 | -7.66  | 0.26  | 0.07 | 0.96 | Yes |
| Bacteria | Proteobacteria | Deltaproteobacteria | Desulfuromonadales | Geobacteraceae      |                           | 0.60%  | -    | 9.24   | -3.90  | 22.38 | 0.17 | 1.00 | 10.50  | -2.32  | 23.32 | 0.11 | 1.00 | 4.82    | -3.63  | 13.27 | 0.26 | 0.95 | 5.73  | -2.46  | 13.92 | 0.17 | 0.96 | Yes |
| Bacteria | Proteobacteria | Deltaproteobacteria | FAC87              |                     |                           | 0.10%  | -    | 12.41  | -19.53 | 44.34 | 0.45 | 1.00 | 10.49  | -20.67 | 41.65 | 0.51 | 1.00 | 17.03   | -3.47  | 37.54 | 0.10 | 0.95 | 15.73 | -4.14  | 35.61 | 0.12 | 0.96 | Yes |
| Bacteria | Proteobacteria | Deltaproteobacteria | GMD14H09           |                     |                           | 4.69%  | -    | -0.88  | -5.80  | 4.04  | 0.73 | 1.00 | 0.27   | -4.54  | 5.08  | 0.91 | 1.00 | -2.10   | -5.26  | 1.06  | 0.19 | 0.95 | -1.28 | -4.35  | 1.79  | 0.41 | 0.96 | Yes |
| Bacteria | Proteobacteria | Deltaproteobacteria | MBNT15             |                     |                           | 0.40%  | -    | -13.86 | -29.86 | 2.15  | 0.09 | 1.00 | -15.35 | -30.96 | 0.27  | 0.05 | 1.00 | -3.66   | -13.96 | 6.64  | 0.49 | 0.95 | -4.69 | -14.68 | 5.29  | 0.36 | 0.96 | Yes |
| Bacteria | Proteobacteria | Deltaproteobacteria | MIZ46              |                     |                           | 0.10%  | -    | -11.25 | -43.23 | 20.73 | 0.49 | 1.00 | -11.11 | -42.31 | 20.09 | 0.48 | 1.00 | -6.49</ |        |       |      |      |       |        |       |      |      |     |

|          |                |                       |                   |                        |                       |        |   |        |        |       |      |      |        |        |       |      |      |        |        |       |      |      |        |        |       |      |      |     |
|----------|----------------|-----------------------|-------------------|------------------------|-----------------------|--------|---|--------|--------|-------|------|------|--------|--------|-------|------|------|--------|--------|-------|------|------|--------|--------|-------|------|------|-----|
| Bacteria | Proteobacteria | Epsilonproteobacteria | Campylobacterales | Helicobacteraceae      | Helicobacter          | 2.59%  | - | -4.75  | -11.18 | 1.68  | 0.15 | 1.00 | -5.94  | -12.22 | 0.33  | 0.06 | 1.00 | -1.20  | -5.33  | 2.94  | 0.57 | 0.95 | -2.02  | -6.03  | 1.99  | 0.32 | 0.96 | Yes |
| Bacteria | Proteobacteria | Epsilonproteobacteria | Campylobacterales | Helicobacteraceae      | Other                 | 1.10%  | - | 1.58   | -8.24  | 11.40 | 0.75 | 1.00 | 1.82   | -7.76  | 11.41 | 0.71 | 1.00 | 0.91   | -5.40  | 7.22  | 0.78 | 0.96 | 1.13   | -4.99  | 7.25  | 0.72 | 0.97 | Yes |
| Bacteria | Proteobacteria | Epsilonproteobacteria | Campylobacterales | Helicobacteraceae      | Sulfuricurvum         | 3.99%  | - | 1.58   | -3.67  | 6.83  | 0.55 | 1.00 | 2.42   | -2.71  | 7.54  | 0.36 | 1.00 | 0.00   | -3.37  | 3.38  | 1.00 | 1.00 | 0.62   | -2.66  | 3.89  | 0.71 | 0.97 | Yes |
| Bacteria | Proteobacteria | Epsilonproteobacteria | Campylobacterales | Helicobacteraceae      | Sulfurimonas          | 0.70%  | - | 1.93   | -10.29 | 14.15 | 0.76 | 1.00 | 2.35   | -9.58  | 14.28 | 0.70 | 1.00 | 1.00   | -6.86  | 8.86  | 0.80 | 0.96 | 1.34   | -6.28  | 8.95  | 0.73 | 0.97 | Yes |
| Bacteria | Proteobacteria | Epsilonproteobacteria | Campylobacterales | Helicobacteraceae      | Other                 | 5.48%  | - | -0.06  | -4.61  | 4.48  | 0.98 | 1.00 | 0.04   | -4.39  | 4.47  | 0.99 | 1.00 | -0.41  | -3.33  | 2.51  | 0.78 | 0.96 | -0.31  | -3.14  | 2.52  | 0.83 | 0.97 | Yes |
| Bacteria | Proteobacteria | Gammaproteobacteria   | [Marinicellales]  | [Marinicellaceae]      | Marinicella           | 0.30%  | - | -11.58 | -30.03 | 6.88  | 0.22 | 1.00 | -12.37 | -30.37 | 5.64  | 0.18 | 1.00 | -9.00  | -20.86 | 2.86  | 0.14 | 0.95 | -9.53  | -21.01 | 1.96  | 0.10 | 0.96 | Yes |
| Bacteria | Proteobacteria | Gammaproteobacteria   | [Marinicellales]  | [Marinicellaceae]      | Other                 | 0.80%  | - | -0.89  | -12.33 | 10.55 | 0.88 | 1.00 | 0.26   | -10.91 | 11.42 | 0.96 | 1.00 | -2.53  | -9.88  | 4.82  | 0.50 | 0.95 | -1.71  | -8.83  | 5.42  | 0.64 | 0.96 | Yes |
| Bacteria | Proteobacteria | Gammaproteobacteria   | Aeromonadales     | Aeromonadaceae         | Tolumonas             | 0.60%  | - | 3.98   | -9.05  | 17.02 | 0.55 | 1.00 | 4.07   | -8.65  | 16.79 | 0.53 | 1.00 | 1.27   | -7.11  | 9.65  | 0.77 | 0.96 | 1.34   | -6.78  | 9.46  | 0.75 | 0.97 | Yes |
| Bacteria | Proteobacteria | Gammaproteobacteria   | Aeromonadales     | Aeromonadaceae         | Other                 | 6.98%  | - | 1.96   | -2.10  | 6.03  | 0.34 | 1.00 | 2.53   | -1.43  | 6.50  | 0.21 | 1.00 | 0.87   | -1.75  | 3.48  | 0.52 | 0.95 | 1.28   | -1.26  | 3.81  | 0.32 | 0.96 | Yes |
| Bacteria | Proteobacteria | Gammaproteobacteria   | Aeromonadales     | Succinivibrionaceae    | Anaerobiospirillum    | 0.10%  | - | -14.35 | -46.50 | 17.81 | 0.38 | 1.00 | -13.76 | -45.13 | 17.62 | 0.39 | 1.00 | -13.51 | -34.17 | 7.16  | 0.20 | 0.95 | -13.08 | -33.10 | 6.94  | 0.20 | 0.96 | Yes |
| Bacteria | Proteobacteria | Gammaproteobacteria   | Aeromonadales     | Succinivibrionaceae    | Ruminobacter          | 0.30%  | - | -9.59  | -28.07 | 8.89  | 0.31 | 1.00 | -14.43 | -32.49 | 3.63  | 0.12 | 1.00 | -3.19  | -15.07 | 8.69  | 0.60 | 0.95 | -6.64  | -18.18 | 4.90  | 0.26 | 0.96 | Yes |
| Bacteria | Proteobacteria | Gammaproteobacteria   | Aeromonadales     | Succinivibrionaceae    | Succinivibrio         | 16.25% | - | 1.40   | -1.40  | 4.20  | 0.33 | 1.00 | 1.28   | -1.46  | 4.01  | 0.36 | 1.00 | 0.91   | -0.89  | 2.71  | 0.32 | 0.95 | 0.83   | -0.92  | 2.57  | 0.35 | 0.96 | Yes |
| Bacteria | Proteobacteria | Gammaproteobacteria   | Aeromonadales     | Succinivibrionaceae    | Other                 | 1.40%  | - | -4.46  | -13.07 | 4.15  | 0.31 | 1.00 | -4.47  | -12.86 | 3.93  | 0.30 | 1.00 | -1.36  | -6.90  | 4.18  | 0.63 | 0.95 | -1.34  | -6.71  | 4.02  | 0.62 | 0.96 | Yes |
| Bacteria | Proteobacteria | Gammaproteobacteria   | Alteromonadales   | [Chromatiaceae]        | Alkalimonas           | 0.10%  | - | -17.35 | -49.30 | 14.61 | 0.29 | 1.00 | -19.50 | -50.68 | 11.68 | 0.22 | 1.00 | -3.93  | -24.49 | 16.62 | 0.71 | 0.95 | -5.44  | -25.36 | 14.47 | 0.59 | 0.96 | Yes |
| Bacteria | Proteobacteria | Gammaproteobacteria   | Alteromonadales   | [Chromatiaceae]        | Other                 | 0.20%  | - | -13.48 | -36.19 | 9.24  | 0.24 | 1.00 | -15.12 | -37.28 | 7.04  | 0.18 | 1.00 | -2.90  | -17.51 | 11.71 | 0.70 | 0.95 | -4.08  | -18.24 | 10.07 | 0.57 | 0.96 | Yes |
| Bacteria | Proteobacteria | Gammaproteobacteria   | Alteromonadales   | [Chromatiaceae]        | Rheinheimera          | 1.40%  | - | 1.43   | -7.17  | 10.04 | 0.74 | 1.00 | -0.24  | -8.65  | 8.16  | 0.95 | 1.00 | 2.05   | -3.47  | 7.58  | 0.47 | 0.95 | 0.87   | -4.49  | 6.24  | 0.75 | 0.97 | Yes |
| Bacteria | Proteobacteria | Gammaproteobacteria   | Alteromonadales   | [Chromatiaceae]        | Other                 | 0.60%  | - | -3.19  | -16.40 | 10.03 | 0.64 | 1.00 | 0.18   | -12.75 | 13.10 | 0.98 | 1.00 | -0.87  | -9.36  | 7.63  | 0.84 | 0.96 | 1.53   | -6.72  | 9.79  | 0.72 | 0.97 | Yes |
| Bacteria | Proteobacteria | Gammaproteobacteria   | Alteromonadales   | 125ds10                | Other                 | 0.30%  | - | 6.65   | -11.88 | 25.18 | 0.48 | 1.00 | 4.39   | -13.70 | 22.49 | 0.63 | 1.00 | 9.25   | -2.65  | 21.16 | 0.13 | 0.95 | 7.70   | -3.84  | 19.24 | 0.19 | 0.96 | Yes |
| Bacteria | Proteobacteria | Gammaproteobacteria   | Alteromonadales   | 211ds20                | Other                 | 0.30%  | - | -6.08  | -24.70 | 12.54 | 0.52 | 1.00 | -4.42  | -22.59 | 13.76 | 0.63 | 1.00 | -7.41  | -19.37 | 4.55  | 0.22 | 0.95 | -6.17  | -17.76 | 5.43  | 0.30 | 0.96 | Yes |
| Bacteria | Proteobacteria | Gammaproteobacteria   | Alteromonadales   | Alteromonadaceae       | Agarivorans           | 0.20%  | - | -4.07  | -26.72 | 18.58 | 0.72 | 1.00 | -6.74  | -28.85 | 15.36 | 0.55 | 1.00 | -1.74  | -16.30 | 12.82 | 0.81 | 0.96 | -3.65  | -17.77 | 10.46 | 0.61 | 0.96 | Yes |
| Bacteria | Proteobacteria | Gammaproteobacteria   | Alteromonadales   | Alteromonadaceae       | Alteromonas           | 2.69%  | - | 0.96   | -5.35  | 7.28  | 0.76 | 1.00 | 1.66   | -4.50  | 7.82  | 0.60 | 1.00 | -1.41  | -5.47  | 2.65  | 0.50 | 0.95 | -0.91  | -4.84  | 3.03  | 0.65 | 0.96 | Yes |
| Bacteria | Proteobacteria | Gammaproteobacteria   | Alteromonadales   | Alteromonadaceae       | BD2-13                | 0.10%  | - | -9.27  | -41.25 | 22.71 | 0.57 | 1.00 | -13.16 | -44.38 | 18.05 | 0.41 | 1.00 | -9.61  | -30.16 | 10.95 | 0.36 | 0.95 | -12.42 | -32.34 | 7.50  | 0.22 | 0.96 | Yes |
| Bacteria | Proteobacteria | Gammaproteobacteria   | Alteromonadales   | Alteromonadaceae       | Candidatus Endobugula | 2.29%  | - | 0.28   | -6.65  | 7.21  | 0.94 | 1.00 | 1.88   | -4.89  | 8.66  | 0.59 | 1.00 | 0.39   | -4.07  | 4.84  | 0.86 | 0.96 | 1.53   | -2.79  | 5.85  | 0.49 | 0.96 | Yes |
| Bacteria | Proteobacteria | Gammaproteobacteria   | Alteromonadales   | Alteromonadaceae       | Cellvibrio            | 1.79%  | - | -0.85  | -8.48  | 6.78  | 0.83 | 1.00 | 0.80   | -6.66  | 8.25  | 0.83 | 1.00 | -2.02  | -6.92  | 2.88  | 0.42 | 0.95 | -0.84  | -5.60  | 3.91  | 0.73 | 0.97 | Yes |
| Bacteria | Proteobacteria | Gammaproteobacteria   | Alteromonadales   | Alteromonadaceae       | Glaciecola            | 1.69%  | - | -3.65  | -11.54 | 4.24  | 0.36 | 1.00 | -2.07  | -9.78  | 5.64  | 0.60 | 1.00 | -1.54  | -6.61  | 3.54  | 0.55 | 0.95 | -0.39  | -5.32  | 4.53  | 0.88 | 0.98 | Yes |
| Bacteria | Proteobacteria | Gammaproteobacteria   | Alteromonadales   | Alteromonadaceae       | Marinimicrobium       | 0.50%  | - | -4.86  | -19.29 | 9.58  | 0.51 | 1.00 | -3.71  | -17.79 | 10.38 | 0.61 | 1.00 | -3.05  | -12.33 | 6.23  | 0.52 | 0.95 | -2.23  | -11.23 | 6.76  | 0.63 | 0.96 | Yes |
| Bacteria | Proteobacteria | Gammaproteobacteria   | Alteromonadales   | Alteromonadaceae       | Marinobacter          | 8.28%  | - | -2.02  | -3.78  | 3.74  | 0.99 | 1.00 | 0.49   | -3.18  | 4.16  | 0.79 | 1.00 | 0.31   | -2.11  | 2.72  | 0.80 | 0.96 | 0.67   | -1.67  | 3.02  | 0.57 | 0.96 | Yes |
| Bacteria | Proteobacteria | Gammaproteobacteria   | Alteromonadales   | Alteromonadaceae       | Microbulbifer         | 1.40%  | - | 1.11   | -6.66  | 10.89 | 0.64 | 1.00 | 2.75   | -5.81  | 11.32 | 0.53 | 1.00 | 2.08   | -3.56  | 7.72  | 0.47 | 0.95 | 2.56   | -2.90  | 8.03  | 0.36 | 0.96 | Yes |
| Bacteria | Proteobacteria | Gammaproteobacteria   | Alteromonadales   | Alteromonadaceae       | Other                 | 0.60%  | - | -4.25  | -17.41 | 8.90  | 0.53 | 1.00 | -1.91  | -14.76 | 10.94 | 0.77 | 1.00 | -3.43  | -11.88 | 5.03  | 0.43 | 0.95 | -1.73  | -9.93  | 6.47  | 0.68 | 0.96 | Yes |
| Bacteria | Proteobacteria | Gammaproteobacteria   | Alteromonadales   | Alteromonadaceae       | Other                 | 1.99%  | - | -1.09  | -8.41  | 6.24  | 0.77 | 1.00 | -0.11  | -7.26  | 7.04  | 0.98 | 1.00 | -2.06  | -6.76  | 2.65  | 0.39 | 0.95 | -1.35  | -5.92  | 3.21  | 0.56 | 0.96 | Yes |
| Bacteria | Proteobacteria | Gammaproteobacteria   | Alteromonadales   | Colwelliaceae          | Thalassomonas         | 0.10%  | - | 0.73   | -31.30 | 32.76 | 0.96 | 1.00 | 0.85   | -30.40 | 32.10 | 0.96 | 1.00 | 8.93   | -11.65 | 29.52 | 0.39 | 0.95 | 9.01   | -10.93 | 28.96 | 0.38 | 0.96 | Yes |
| Bacteria | Proteobacteria | Gammaproteobacteria   | Alteromonadales   | Colwelliaceae          | Other                 | 0.80%  | - | -5.52  | -16.86 | 5.81  | 0.34 | 1.00 | -4.41  | -15.48 | 6.66  | 0.43 | 1.00 | -1.98  | -9.27  | 5.31  | 0.59 | 0.95 | -1.16  | -8.23  | 5.90  | 0.75 | 0.97 | Yes |
| Bacteria | Proteobacteria | Gammaproteobacteria   | Alteromonadales   | HTCC2188               | HTCC                  | 0.70%  | - | -3.59  | -15.72 | 8.54  | 0.56 | 1.00 | -3.97  | -15.80 | 7.87  | 0.51 | 1.00 | -3.97  | -11.77 | 3.83  | 0.32 | 0.95 | -4.23  | -11.78 | 3.32  | 0.27 | 0.96 | Yes |
| Bacteria | Proteobacteria | Gammaproteobacteria   | Alteromonadales   | HTCC2188               | Other                 | 0.20%  | - | -7.21  | -29.99 | 15.57 | 0.53 | 1.00 | -4.98  | -27.22 | 17.26 | 0.66 | 1.00 | -7.69  | -22.33 | 6.95  | 0.30 | 0.95 | -6.03  | -20.22 | 8.17  | 0.40 | 0.96 | Yes |
| Bacteria | Proteobacteria | Gammaproteobacteria   | Alteromonadales   | Idiomarinaceae         | Idiomarina            | 1.10%  | - | -3.36  | -13.11 | 6.40  | 0.50 | 1.00 | -0.46  | -10.01 | 9.10  | 0.93 | 1.00 | -4.39  | -10.65 | 1.88  | 0.17 | 0.95 | -2.32  | -8.41  | 3.78  | 0.46 | 0.96 | Yes |
| Bacteria | Proteobacteria | Gammaproteobacteria   | Alteromonadales   | Idiomarinaceae         | Pseudidiomarina       | 0.50%  | - | -3.38  | -17.79 | 11.04 | 0.65 | 1.00 | -2.00  | -16.07 | 12.07 | 0.78 | 1.00 | -4.91  | -14.17 | 4.35  | 0.30 | 0.95 | -3.93  | -12.91 | 5.05  | 0.39 | 0.96 | Yes |
| Bacteria | Proteobacteria | Gammaproteobacteria   | Alteromonadales   | Idiomarinaceae         | Other                 | 2.19%  | - | -2.52  | -9.55  | 4.51  | 0.48 | 1.00 | -0.46  | -7.35  | 6.42  | 0.89 | 1.00 | -1.37  | -5.89  | 3.15  | 0.55 | 0.95 | 0.10   | -4.30  | 4.49  | 0.96 | 0.99 | Yes |
| Bacteria | Proteobacteria | Gammaproteobacteria   | Alteromonadales   | Moritellaceae          | Moritella             | 0.20%  | - | 11.39  | -11.18 | 33.96 | 0.32 | 1.00 | 11.48  | -10.54 | 33.50 | 0.31 | 1.00 | 9.87   | -4.63  | 24.37 | 0.18 | 0.95 | 9.97   | -4.08  | 24.02 | 0.16 | 0.96 | Yes |
| Bacteria | Proteobacteria | Gammaproteobacteria   | Alteromonadales   | OM60                   | Other                 | 2.89%  | - | -0.56  | -6.60  | 5.48  | 0.86 | 1.00 | -2.04  | -7.95  | 3.87  | 0.50 | 1.00 | 1.45   | -2.43  | 5.33  | 0.46 | 0.95 | 0.40   | -3.37  | 4.17  | 0.83 | 0.97 | Yes |
| Bacteria | Proteobacteria | Gammaproteobacteria   | Alteromonadales   | Psychromonadaceae      | Psychromonas          | 1.10%  | - | 1.26   | -8.54  | 11.06 | 0.80 | 1.00 | -0.14  | -9.71  | 9.42  | 0.98 | 1.00 | 4.63   | -1.66  | 10.93 | 0.15 | 0.95 | 3.66   | -2.44  | 9.77  | 0.24 | 0.96 | Yes |
| Bacteria | Proteobacteria | Gammaproteobacteria   | Alteromonadales   | Psychromonadaceae      | Other                 | 0.20%  | - | 5.26   | -17.60 | 28.11 | 0.65 | 1.00 | 2.16   | -20.16 | 24.47 | 0.85 | 1.00 | 3.13   | -11.57 | 17.82 | 0.68 | 0.95 | 0.89   | -13.36 | 15.14 | 0.90 | 0.99 | Yes |
| Bacteria | Proteobacteria | Gammaproteobacteria   | Alteromonadales   | Shewanellaceae         | Shewanella            | 4.49%  | - | -5.75  | -10.72 | -0.78 | 0.02 | 0.99 | -5.84  | -10.68 | -0.99 | 0.02 | 1.00 | -2.55  | -5.75  | 0.64  | 0.12 | 0.95 | -2.59  | -5.69  | 0.51  | 0.10 | 0.96 | Yes |
| Bacteria | Proteobacteria | Gammaproteobacteria   | Alteromonadales   | Other                  | Other                 | 0.70%  | - | -1.00  | -13.19 | 11.19 | 0.87 | 1.00 | -2.48  | -14.38 | 9.42  | 0.68 | 1.00 | -1.68  | -9.52  | 6.15  | 0.67 | 0.95 | -2.71  | -10.31 | 4.88  | 0.48 | 0.96 | Yes |
| Bacteria | Proteobacteria | Gammaproteobacteria   | Cardiobacteriales | Cardiobacteriaceae     | Cardiobacterium       | 5.58%  | - | 0.81   | -3.59  | 5.21  | 0.72 | 1.00 | 1.43   | -2.87  | 5.73  | 0.51 | 1.00 | 0.92   | -1.91  | 3.75  | 0.52 | 0.95 | 1.38   | -1.36  | 4.12  | 0.32 | 0.96 | Yes |
| Bacteria | Proteobacteria | Gammaproteobacteria   | Chromatiales      | Ectothiorhodospiraceae | Halorhodospira        | 0.20%  | - | -12.60 | -35.30 | 10.09 | 0.28 | 1.00 | -13.66 | -35.80 | 8.48  | 0.23 | 1.00 | -6.27  | -20.86 | 8.33  | 0.40 | 0.95 | -6.99  | -21.13 | 7.15  | 0.33 | 0.96 | Yes |
| Bacteria | Proteobacteria | Gammaproteobacteria   | Chromatiales      | Ectothiorhodospiraceae | Other                 | 0.40%  | - | -0.99  | -17.06 | 15.07 | 0.90 | 1.00 | 0.84   | -14.84 | 16.52 | 0.92 | 1.00 | -0.19  | -10.52 | 10.14 | 0.97 | 0.99 | 1.11   | -8.90  | 11.12 | 0.83 | 0.97 | Yes |
| Bacteria | Proteobacteria | Gammaproteobacteria   | Chromatiales      | Halothiobacillaceae    | Thiovirga             | 1.10%  | - | -0.83  | -10.58 | 8.91  | 0.87 | 1.00 | -3.00  | -12.53 | 6.53  | 0.54 | 1.00 | -0.26  | -6.52  | 6.01  | 0.94 | 0.98 | -1.79  | -7.87  | 4.29  | 0.56 | 0.96 | Yes |
| Bacteria | Proteobacteria | Gammaproteobacteria   | Chromatiales      | Other                  | Other                 | 0.40%  | - | 1.29   | -14.78 |       |      |      |        |        |       |      |      |        |        |       |      |      |        |        |       |      |      |     |

|          |                |                     |                   |                        |                     |        |      |        |        |       |      |      |        |        |       |      |      |        |        |       |      |      |        |        |       |      |      |     |
|----------|----------------|---------------------|-------------------|------------------------|---------------------|--------|------|--------|--------|-------|------|------|--------|--------|-------|------|------|--------|--------|-------|------|------|--------|--------|-------|------|------|-----|
| Bacteria | Proteobacteria | Gammaproteobacteria | Oceanospirillales | Alcanivoracaceae       | Alcanivorax         | 1.40%  | -    | -2.46  | -11.17 | 6.25  | 0.58 | 1.00 | -1.83  | -10.33 | 6.67  | 0.67 | 1.00 | -4.56  | -10.16 | 1.03  | 0.11 | 0.95 | -4.11  | -9.53  | 1.31  | 0.14 | 0.96 | Yes |
| Bacteria | Proteobacteria | Gammaproteobacteria | Oceanospirillales | Halomonadaceae         | Candidatus Portiera | 1.40%  | -    | -4.42  | -13.26 | 4.41  | 0.33 | 1.00 | -3.86  | -12.48 | 4.77  | 0.38 | 1.00 | -3.09  | -8.77  | 2.59  | 0.29 | 0.95 | -2.69  | -8.19  | 2.81  | 0.34 | 0.96 | Yes |
| Bacteria | Proteobacteria | Gammaproteobacteria | Oceanospirillales | Halomonadaceae         | Chromohalobacter    | 1.20%  | -    | -1.97  | -11.37 | 7.43  | 0.68 | 1.00 | -0.14  | -9.32  | 9.05  | 0.98 | 1.00 | -0.72  | -6.77  | 5.32  | 0.81 | 0.96 | 0.60   | -5.27  | 6.46  | 0.84 | 0.98 | Yes |
| Bacteria | Proteobacteria | Gammaproteobacteria | Oceanospirillales | Halomonadaceae         | Cobetia             | 0.10%  | -    | -17.53 | -49.54 | 14.47 | 0.28 | 1.00 | -19.96 | -51.19 | 11.27 | 0.21 | 1.00 | -2.65  | -23.24 | 17.94 | 0.80 | 0.96 | -4.41  | -24.36 | 15.54 | 0.66 | 0.96 | Yes |
| Bacteria | Proteobacteria | Gammaproteobacteria | Oceanospirillales | Halomonadaceae         | Haererehalobacter   | 0.90%  | -    | 3.86   | -6.95  | 14.66 | 0.48 | 1.00 | 5.24   | -5.31  | 15.78 | 0.33 | 1.00 | 4.36   | -2.58  | 11.31 | 0.22 | 0.95 | 5.35   | -1.38  | 12.07 | 0.12 | 0.96 | Yes |
| Bacteria | Proteobacteria | Gammaproteobacteria | Oceanospirillales | Halomonadaceae         | Halomonas           | 21.14% | -    | -0.08  | -2.62  | 2.46  | 0.95 | 1.00 | 0.42   | -2.06  | 2.90  | 0.74 | 1.00 | -0.37  | -2.00  | 1.26  | 0.66 | 0.95 | 0.00   | -1.59  | 1.58  | 1.00 | 1.00 | Yes |
| Bacteria | Proteobacteria | Gammaproteobacteria | Oceanospirillales | Halomonadaceae         | Other               | 0.10%  | -    | -12.69 | -44.91 | 19.52 | 0.44 | 1.00 | -10.79 | -42.23 | 20.65 | 0.50 | 1.00 | -14.08 | -34.78 | 6.61  | 0.18 | 0.95 | -12.74 | -32.80 | 7.32  | 0.21 | 0.96 | Yes |
| Bacteria | Proteobacteria | Gammaproteobacteria | Oceanospirillales | Halomonadaceae         | Other               | 1.10%  | -    | -1.38  | -11.07 | 8.32  | 0.78 | 1.00 | -1.75  | -11.21 | 7.71  | 0.72 | 1.00 | -0.67  | -6.90  | 5.56  | 0.83 | 0.96 | -0.91  | -6.95  | 5.13  | 0.77 | 0.97 | Yes |
| Bacteria | Proteobacteria | Gammaproteobacteria | Oceanospirillales | Oceanospirillaceae     | Marinobacterium     | 0.30%  | -    | -6.89  | -25.46 | 11.67 | 0.47 | 1.00 | -6.01  | -24.13 | 12.11 | 0.52 | 1.00 | -4.94  | -16.88 | 6.99  | 0.42 | 0.95 | -4.31  | -15.87 | 7.25  | 0.46 | 0.96 | Yes |
| Bacteria | Proteobacteria | Gammaproteobacteria | Oceanospirillales | Oceanospirillaceae     | Marinomonas         | 0.10%  | -    | -17.53 | -49.54 | 14.47 | 0.28 | 1.00 | -19.96 | -51.19 | 11.27 | 0.21 | 1.00 | -2.65  | -23.24 | 17.94 | 0.80 | 0.96 | -4.41  | -24.36 | 15.54 | 0.66 | 0.96 | Yes |
| Bacteria | Proteobacteria | Gammaproteobacteria | Oceanospirillales | Oceanospirillaceae     | Other               | 0.10%  | -    | -18.32 | -50.26 | 13.61 | 0.26 | 1.00 | -16.35 | -47.52 | 14.82 | 0.30 | 1.00 | -10.92 | -31.45 | 9.61  | 0.30 | 0.95 | -9.50  | -29.39 | 10.40 | 0.35 | 0.96 | Yes |
| Bacteria | Proteobacteria | Gammaproteobacteria | Oceanospirillales | Saccharospirillaceae   | ML110J-20           | 1.20%  | -    | -0.17  | -9.58  | 9.24  | 0.97 | 1.00 | 0.95   | -8.23  | 10.14 | 0.84 | 1.00 | -1.65  | -7.69  | 4.40  | 0.59 | 0.95 | -0.84  | -6.71  | 5.02  | 0.78 | 0.97 | Yes |
| Bacteria | Proteobacteria | Gammaproteobacteria | Oceanospirillales | Saccharospirillaceae   | Saccharospirillum   | 0.90%  | -    | -1.44  | -12.26 | 9.37  | 0.79 | 1.00 | 0.08   | -10.48 | 10.63 | 0.99 | 1.00 | -1.61  | -8.56  | 5.34  | 0.65 | 0.95 | -0.52  | -7.26  | 6.22  | 0.88 | 0.98 | Yes |
| Bacteria | Proteobacteria | Gammaproteobacteria | Oceanospirillales | Saccharospirillaceae   | Other               | 1.00%  | -    | -0.91  | -11.24 | 9.42  | 0.86 | 1.00 | 0.75   | -9.34  | 10.84 | 0.88 | 1.00 | -2.13  | -8.77  | 4.51  | 0.53 | 0.95 | -0.95  | -7.39  | 5.49  | 0.77 | 0.97 | Yes |
| Bacteria | Proteobacteria | Gammaproteobacteria | Oceanospirillales | SUP05                  | Other               | 0.10%  | -    | 7.17   | -24.76 | 39.10 | 0.66 | 1.00 | 7.65   | -23.50 | 38.80 | 0.63 | 1.00 | 9.56   | -10.96 | 30.08 | 0.36 | 0.95 | 9.93   | -9.94  | 29.81 | 0.33 | 0.96 | Yes |
| Bacteria | Proteobacteria | Gammaproteobacteria | Oceanospirillales | Other                  | Other               | 0.30%  | -    | -10.77 | -29.26 | 7.72  | 0.25 | 1.00 | -10.02 | -28.06 | 8.02  | 0.28 | 1.00 | -0.85  | -12.75 | 11.04 | 0.89 | 0.97 | -0.29  | -11.81 | 11.23 | 0.96 | 0.99 | Yes |
| Bacteria | Proteobacteria | Gammaproteobacteria | Other             | Other                  | Other               | 3.69%  | -    | 2.77   | -2.60  | 8.15  | 0.31 | 1.00 | 2.44   | -2.80  | 7.69  | 0.36 | 1.00 | 1.17   | -2.29  | 4.63  | 0.51 | 0.95 | 0.94   | -2.41  | 4.29  | 0.58 | 0.96 | Yes |
| Bacteria | Proteobacteria | Gammaproteobacteria | Pasteurellales    | Pasteurellaceae        | Actinobacillus      | 10.27% | -    | 2.51   | -0.84  | 5.85  | 0.14 | 1.00 | 1.79   | -1.50  | 5.07  | 0.29 | 1.00 | 0.66   | -1.49  | 2.81  | 0.55 | 0.95 | 0.06   | -2.04  | 2.15  | 0.96 | 0.99 | Yes |
| Bacteria | Proteobacteria | Gammaproteobacteria | Pasteurellales    | Pasteurellaceae        | Aggregatibacter     | 16.45% | -    | -1.70  | -4.44  | 1.03  | 0.22 | 1.00 | -1.76  | -4.43  | 0.91  | 0.20 | 1.00 | -1.10  | -2.86  | 0.66  | 0.22 | 0.95 | -1.13  | -2.83  | 0.58  | 0.19 | 0.96 | Yes |
| Bacteria | Proteobacteria | Gammaproteobacteria | Pasteurellales    | Pasteurellaceae        | Gallibacterium      | 0.20%  | -    | -12.60 | -35.30 | 10.09 | 0.28 | 1.00 | -13.66 | -35.80 | 8.48  | 0.23 | 1.00 | -6.27  | -20.86 | 8.33  | 0.40 | 0.95 | -6.99  | -21.13 | 7.15  | 0.33 | 0.96 | Yes |
| Bacteria | Proteobacteria | Gammaproteobacteria | Pasteurellales    | Pasteurellaceae        | Haemophilus         | 0.28   | 0.38 | 1.06   | -1.63  | 3.74  | 0.44 | 1.00 | 0.89   | -1.74  | 3.51  | 0.51 | 1.00 | 0.51   | -1.21  | 2.24  | 0.56 | 0.95 | 0.38   | -1.30  | 2.05  | 0.66 | 0.96 | No  |
| Bacteria | Proteobacteria | Gammaproteobacteria | Pasteurellales    | Pasteurellaceae        | Mannheimia          | 0.70%  | -    | -4.52  | -16.71 | 7.68  | 0.47 | 1.00 | -1.42  | -13.36 | 10.51 | 0.81 | 1.00 | -2.52  | -10.36 | 5.32  | 0.53 | 0.95 | -0.30  | -7.91  | 7.32  | 0.94 | 0.99 | Yes |
| Bacteria | Proteobacteria | Gammaproteobacteria | Pasteurellales    | Pasteurellaceae        | Other               | 1.40%  | -    | 5.77   | -2.94  | 14.48 | 0.19 | 1.00 | 5.47   | -3.03  | 13.97 | 0.21 | 1.00 | 4.86   | -0.74  | 10.45 | 0.09 | 0.95 | 4.66   | -0.76  | 10.08 | 0.09 | 0.96 | Yes |
| Bacteria | Proteobacteria | Gammaproteobacteria | Pasteurellales    | Pasteurellaceae        | Pasteurella         | 0.20%  | -    | 11.77  | -10.86 | 34.39 | 0.31 | 1.00 | 13.22  | -8.86  | 35.29 | 0.24 | 1.00 | -8.65  | -23.19 | 5.89  | 0.24 | 0.95 | -7.61  | -21.70 | 6.49  | 0.29 | 0.96 | Yes |
| Bacteria | Proteobacteria | Gammaproteobacteria | Pasteurellales    | Pasteurellaceae        | Other               | 1.10%  | -    | 0.50   | -9.23  | 10.23 | 0.92 | 1.00 | 1.41   | -8.09  | 10.91 | 0.77 | 1.00 | -3.91  | -10.17 | 2.34  | 0.22 | 0.95 | -3.26  | -9.32  | 2.80  | 0.29 | 0.96 | Yes |
| Bacteria | Proteobacteria | Gammaproteobacteria | Pasteurellales    | Pasteurellaceae        | Other               | 1.10%  | -    | -3.33  | -13.09 | 6.44  | 0.50 | 1.00 | -4.06  | -13.59 | 5.47  | 0.40 | 1.00 | -2.66  | -8.94  | 3.61  | 0.41 | 0.95 | -3.17  | -9.25  | 2.92  | 0.31 | 0.96 | Yes |
| Bacteria | Proteobacteria | Gammaproteobacteria | Pseudomonadales   | Moraxellaceae          | Acinetobacter       | 0.56   | 0.49 | 0.17   | -1.93  | 2.27  | 0.88 | 1.00 | 0.38   | -1.67  | 2.43  | 0.72 | 1.00 | -0.11  | -1.46  | 1.24  | 0.88 | 0.96 | 0.05   | -1.25  | 1.36  | 0.94 | 0.99 | No  |
| Bacteria | Proteobacteria | Gammaproteobacteria | Pseudomonadales   | Moraxellaceae          | Enhydrobacter       | 7.38%  | -    | -2.43  | -6.29  | 1.43  | 0.22 | 1.00 | -2.17  | -5.94  | 1.59  | 0.26 | 1.00 | -0.58  | -3.06  | 1.91  | 0.65 | 0.95 | -0.39  | -2.79  | 2.02  | 0.75 | 0.97 | Yes |
| Bacteria | Proteobacteria | Gammaproteobacteria | Pseudomonadales   | Moraxellaceae          | Moraxella           | 2.69%  | -    | -2.24  | -8.53  | 4.05  | 0.48 | 1.00 | -1.70  | -7.84  | 4.44  | 0.59 | 1.00 | 1.28   | -2.77  | 5.32  | 0.54 | 0.95 | 1.69   | -2.22  | 5.61  | 0.40 | 0.96 | Yes |
| Bacteria | Proteobacteria | Gammaproteobacteria | Pseudomonadales   | Moraxellaceae          | Other               | 0.60%  | -    | -2.94  | -16.18 | 10.30 | 0.66 | 1.00 | -1.81  | -14.73 | 11.11 | 0.78 | 1.00 | 0.25   | -8.26  | 8.76  | 0.95 | 0.98 | 1.09   | -7.16  | 9.34  | 0.80 | 0.97 | Yes |
| Bacteria | Proteobacteria | Gammaproteobacteria | Pseudomonadales   | Moraxellaceae          | Psychrobacter       | 7.08%  | -    | -1.72  | -5.80  | 2.36  | 0.41 | 1.00 | -1.59  | -5.57  | 2.40  | 0.43 | 1.00 | -0.61  | -3.24  | 2.01  | 0.65 | 0.95 | -0.50  | -3.05  | 2.04  | 0.70 | 0.97 | Yes |
| Bacteria | Proteobacteria | Gammaproteobacteria | Pseudomonadales   | Moraxellaceae          | Other               | 17.05% | -    | 2.72   | -0.03  | 5.48  | 0.05 | 0.99 | 2.43   | -0.26  | 5.12  | 0.08 | 1.00 | 0.78   | -0.99  | 2.56  | 0.39 | 0.95 | 0.58   | -1.14  | 2.31  | 0.51 | 0.96 | Yes |
| Bacteria | Proteobacteria | Gammaproteobacteria | Pseudomonadales   | Pseudomonadaceae       | Other               | 0.80%  | -    | 3.99   | -7.41  | 15.40 | 0.49 | 1.00 | 3.92   | -7.21  | 15.05 | 0.49 | 1.00 | 2.77   | -4.56  | 10.10 | 0.46 | 0.95 | 2.72   | -4.38  | 9.83  | 0.45 | 0.96 | Yes |
| Bacteria | Proteobacteria | Gammaproteobacteria | Pseudomonadales   | Pseudomonadaceae       | Pseudomonas         | 18.64% | -    | 1.49   | -1.12  | 4.10  | 0.26 | 1.00 | 1.49   | -1.06  | 4.04  | 0.25 | 1.00 | 0.84   | -0.84  | 2.52  | 0.32 | 0.95 | 0.85   | -0.77  | 2.48  | 0.30 | 0.96 | Yes |
| Bacteria | Proteobacteria | Gammaproteobacteria | Pseudomonadales   | Pseudomonadaceae       | Other               | 7.78%  | -    | -0.23  | -4.09  | 3.64  | 0.91 | 1.00 | -0.12  | -3.89  | 3.65  | 0.95 | 1.00 | -0.87  | -3.35  | 1.61  | 0.49 | 0.95 | -0.79  | -3.19  | 1.62  | 0.52 | 0.96 | Yes |
| Bacteria | Proteobacteria | Gammaproteobacteria | Pseudomonadales   | Pseudomonadaceae       | Pseudomonas         | 0.20%  | -    | -11.86 | -34.65 | 10.93 | 0.31 | 1.00 | -8.29  | -30.55 | 13.97 | 0.47 | 1.00 | -11.27 | -25.91 | 3.36  | 0.13 | 0.95 | -8.71  | -22.91 | 5.49  | 0.23 | 0.96 | Yes |
| Bacteria | Proteobacteria | Gammaproteobacteria | Thiotrichales     | Piscirickettsiaceae    | Methylophaga        | 1.99%  | -    | -2.96  | -10.40 | 4.48  | 0.44 | 1.00 | -0.92  | -8.21  | 6.36  | 0.80 | 1.00 | -4.41  | -9.19  | 0.37  | 0.07 | 0.95 | -2.97  | -7.61  | 1.68  | 0.21 | 0.96 | Yes |
| Bacteria | Proteobacteria | Gammaproteobacteria | Thiotrichales     | Piscirickettsiaceae    | Other               | 1.99%  | -    | 3.16   | -4.18  | 10.50 | 0.40 | 1.00 | 1.73   | -5.44  | 8.90  | 0.64 | 1.00 | 0.57   | -4.15  | 5.29  | 0.81 | 0.96 | -0.43  | -5.01  | 4.15  | 0.85 | 0.98 | Yes |
| Bacteria | Proteobacteria | Gammaproteobacteria | Thiotrichales     | Other                  | Other               | 0.20%  | -    | 16.41  | -6.20  | 39.02 | 0.15 | 1.00 | 14.87  | -7.19  | 36.94 | 0.19 | 1.00 | 10.72  | -3.81  | 25.26 | 0.15 | 0.95 | 9.68   | -4.41  | 23.76 | 0.18 | 0.96 | Yes |
| Bacteria | Proteobacteria | Gammaproteobacteria | Vibrionales       | Other                  | Other               | 0.30%  | -    | -10.00 | -28.59 | 8.60  | 0.29 | 1.00 | -7.24  | -25.40 | 10.92 | 0.43 | 1.00 | -5.15  | -17.11 | 6.80  | 0.40 | 0.95 | -3.19  | -14.79 | 8.40  | 0.59 | 0.96 | Yes |
| Bacteria | Proteobacteria | Gammaproteobacteria | Vibrionales       | Pseudoalteromonadaceae | Pseudoalteromonas   | 3.09%  | -    | -3.39  | -9.26  | 2.47  | 0.26 | 1.00 | -3.24  | -8.96  | 2.48  | 0.27 | 1.00 | -1.08  | -4.85  | 2.69  | 0.57 | 0.95 | -0.96  | -4.61  | 2.70  | 0.61 | 0.96 | Yes |
| Bacteria | Proteobacteria | Gammaproteobacteria | Vibrionales       | Pseudoalteromonadaceae | Other               | 6.28%  | -    | -0.71  | -4.92  | 3.51  | 0.74 | 1.00 | -0.96  | -5.08  | 3.15  | 0.65 | 1.00 | -0.42  | -3.13  | 2.29  | 0.76 | 0.96 | -0.60  | -3.23  | 2.03  | 0.65 | 0.96 | Yes |
| Bacteria | Proteobacteria | Gammaproteobacteria | Vibrionales       | Vibrionaceae           | Aliivibrio          | 0.30%  | -    | 7.04   | -11.43 | 25.51 | 0.45 | 1.00 | 8.96   | -9.07  | 26.98 | 0.33 | 1.00 | -4.67  | -16.54 | 7.20  | 0.44 | 0.95 | -3.28  | -14.79 | 8.23  | 0.58 | 0.96 | Yes |
| Bacteria | Proteobacteria | Gammaproteobacteria | Vibrionales       | Vibrionaceae           | Enterovibrio        | 0.30%  | -    | -9.48  | -28.03 | 9.07  | 0.32 | 1.00 | -8.53  | -26.63 | 9.57  | 0.36 | 1.00 | -9.08  | -21.00 | 2.83  | 0.14 | 0.95 | -8.41  | -19.96 | 3.13  | 0.15 | 0.96 | Yes |
| Bacteria | Proteobacteria | Gammaproteobacteria | Vibrionales       | Vibrionaceae           | Other               | 1.60%  | -    | -1.43  | -9.53  | 6.67  | 0.73 | 1.00 | -1.94  | -9.85  | 5.96  | 0.63 | 1.00 | 1.40   | -3.80  | 6.61  | 0.60 | 0.95 | 1.06   | -3.98  | 6.11  | 0.68 | 0.96 | Yes |
| Bacteria | Proteobacteria | Gammaproteobacteria | Vibrionales       | Vibrionaceae           | Photobacterium      | 1.40%  | -    | 0.00   | -8.61  | 8.60  | 1.00 | 1.00 | -1.24  | -9.64  | 7.16  | 0.77 | 1.00 | 3.13   | -2.40  | 8.66  | 0.27 | 0.95 | 2.24   | -3.12  | 7.60  | 0.41 | 0.96 | Yes |
| Bacteria | Proteobacteria | Gammaproteobacteria | Vibrionales       | Vibrionaceae           | Salinivibrio        | 8.37%  | -    | -1.21  | -4.88  | 2.46  | 0.52 | 1.00 | -1.42  | -5.01  | 2.16  | 0.44 | 1.00 | -0.17  | -2.54  | 2.19  | 0.88 | 0.97 | -0.32  | -2.61  | 1.97  | 0.79 | 0.97 | Yes |
| Bacteria | Proteobacteria | Gammaproteobacteria | Vibrionales       | Vibrionaceae           | Vibrio              | 5.98%  | -    | 0.29   | -4.04  | 4.62  | 0.89 | 1.00 | -0.08  | -4.31  |       |      |      |        |        |       |      |      |        |        |       |      |      |     |

|          |                 |                       |                       |                       |                       |                         |        |      |        |        |       |      |      |        |        |       |      |      |        |        |       |      |      |        |        |       |      |      |     |
|----------|-----------------|-----------------------|-----------------------|-----------------------|-----------------------|-------------------------|--------|------|--------|--------|-------|------|------|--------|--------|-------|------|------|--------|--------|-------|------|------|--------|--------|-------|------|------|-----|
| Bacteria | Spirochaetes    | Spirochaetes          | Spirochaetales        | Spirochaetales        | Spirochaetales        | Treponema               | 3.59%  | -    | -2.01  | -7.45  | 3.43  | 0.47 | 1.00 | -2.12  | -7.42  | 3.19  | 0.43 | 1.00 | -2.63  | -6.12  | 0.86  | 0.14 | 0.95 | -2.70  | -6.09  | 0.68  | 0.12 | 0.96 | Yes |
| Bacteria | Spirochaetes    | Spirochaetes          | Spirochaetales        | Spirochaetales        | Spirochaetales        | Spirochaetales          | 0.20%  | -    | -7.88  | -30.56 | 14.80 | 0.50 | 1.00 | -7.24  | -29.37 | 14.89 | 0.52 | 1.00 | -3.33  | -17.92 | 11.25 | 0.65 | 0.95 | -2.89  | -17.01 | 11.24 | 0.69 | 0.96 | Yes |
| Bacteria | Synergistetes   | Synergistia           | Synergistales         | Synergistales         | Synergistales         | Anaerobaculum           | 0.30%  | -    | -11.32 | -29.77 | 7.14  | 0.23 | 1.00 | -11.16 | -29.17 | 6.85  | 0.22 | 1.00 | -5.65  | -17.52 | 6.22  | 0.35 | 0.95 | -5.51  | -17.01 | 5.99  | 0.35 | 0.96 | Yes |
| Bacteria | Synergistetes   | Synergistia           | Synergistales         | Synergistales         | Synergistales         | Dethiosulfovibrionaceae | 0.40%  | -    | -9.32  | -25.38 | 6.75  | 0.26 | 1.00 | -7.32  | -23.01 | 8.37  | 0.36 | 1.00 | -1.44  | -11.78 | 8.89  | 0.78 | 0.96 | 0.00   | -10.02 | 10.02 | 1.00 | 1.00 | Yes |
| Bacteria | Synergistetes   | Synergistia           | Synergistales         | Synergistales         | Synergistales         | Dethiosulfovibrionaceae | 0.20%  | -    | -17.80 | -40.39 | 4.79  | 0.12 | 1.00 | -14.93 | -36.99 | 7.13  | 0.18 | 1.00 | -5.64  | -20.18 | 8.90  | 0.45 | 0.95 | -3.54  | -17.64 | 10.55 | 0.62 | 0.96 | Yes |
| Bacteria | Synergistetes   | Synergistia           | Synergistales         | Synergistales         | Synergistales         | Dethiosulfovibrionaceae | 2.19%  | -    | -2.32  | -9.23  | 4.60  | 0.51 | 1.00 | -3.08  | -9.83  | 3.67  | 0.37 | 1.00 | 0.21   | -4.24  | 4.66  | 0.93 | 0.98 | -0.31  | -4.62  | 4.00  | 0.89 | 0.99 | Yes |
| Bacteria | Synergistetes   | Synergistia           | Synergistales         | Synergistales         | Synergistales         | Dethiosulfovibrionaceae | 0.30%  | -    | -4.75  | -23.26 | 13.76 | 0.61 | 1.00 | -8.70  | -26.78 | 9.38  | 0.35 | 1.00 | 4.60   | -7.29  | 16.50 | 0.45 | 0.95 | 1.82   | -9.73  | 13.37 | 0.76 | 0.97 | Yes |
| Bacteria | Synergistetes   | Synergistia           | Synergistales         | Synergistales         | Synergistales         | Synergistaceae          | 1.00%  | -    | -1.77  | -11.95 | 8.40  | 0.73 | 1.00 | -1.78  | -11.71 | 8.14  | 0.72 | 1.00 | -4.64  | -11.17 | 1.90  | 0.16 | 0.95 | -4.65  | -10.98 | 1.68  | 0.15 | 0.96 | Yes |
| Bacteria | Synergistetes   | Synergistia           | Synergistales         | Synergistales         | Synergistales         | Synergistaceae          | 0.60%  | -    | -6.31  | -19.38 | 6.75  | 0.34 | 1.00 | -4.32  | -17.08 | 8.44  | 0.51 | 1.00 | 1.43   | -6.98  | 9.83  | 0.74 | 0.96 | 2.86   | -5.29  | 11.01 | 0.49 | 0.96 | Yes |
| Bacteria | Synergistetes   | Synergistia           | Synergistales         | Synergistales         | Synergistales         | Thermovirgaceae         | 0.30%  | -    | -7.75  | -26.23 | 10.72 | 0.41 | 1.00 | -8.98  | -27.01 | 9.05  | 0.33 | 1.00 | -7.87  | -19.75 | 4.00  | 0.19 | 0.95 | -8.71  | -20.22 | 2.79  | 0.14 | 0.96 | Yes |
| Bacteria | Tenericutes     | CK-1C4-19             |                       |                       |                       |                         | 0.60%  | -    | 9.91   | -3.19  | 23.01 | 0.14 | 1.00 | 11.65  | -1.13  | 24.43 | 0.07 | 1.00 | 4.64   | -3.79  | 13.06 | 0.28 | 0.95 | 5.89   | -2.28  | 14.05 | 0.16 | 0.96 | Yes |
| Bacteria | Tenericutes     | Mollicutes            | Acholeplasmatales     | Acholeplasmatales     | Acholeplasmatales     | Acholeplasmataceae      | 0.50%  | -    | -16.53 | -30.93 | -2.14 | 0.02 | 0.99 | -14.77 | -28.83 | -0.72 | 0.04 | 1.00 | -8.31  | -17.57 | 0.95  | 0.08 | 0.95 | -7.05  | -16.04 | 1.93  | 0.12 | 0.96 | Yes |
| Bacteria | Tenericutes     | Mollicutes            | Acholeplasmatales     | Acholeplasmatales     | Acholeplasmatales     | Acholeplasmataceae      | 0.10%  | -    | -17.43 | -49.53 | 14.67 | 0.29 | 1.00 | -18.55 | -49.87 | 12.77 | 0.25 | 1.00 | -5.22  | -25.87 | 15.42 | 0.62 | 0.95 | -6.05  | -26.05 | 13.95 | 0.55 | 0.96 | Yes |
| Bacteria | Tenericutes     | Mollicutes            | Acholeplasmatales     | Acholeplasmatales     | Acholeplasmatales     | Acholeplasmataceae      | 0.20%  | -    | -2.17  | -24.89 | 20.55 | 0.85 | 1.00 | 4.11   | -18.12 | 26.34 | 0.72 | 1.00 | -2.66  | -17.26 | 11.94 | 0.72 | 0.96 | 1.81   | -12.38 | 16.00 | 0.80 | 0.97 | Yes |
| Bacteria | Tenericutes     | Mollicutes            | Anaeroplasmatales     | Anaeroplasmatales     | Anaeroplasmatales     | Anaeroplasmataceae      | 3.09%  | -    | 0.04   | -5.80  | 5.87  | 0.99 | 1.00 | -0.37  | -6.06  | 5.32  | 0.90 | 1.00 | -2.46  | -6.21  | 1.28  | 0.20 | 0.95 | -2.74  | -6.36  | 0.89  | 0.14 | 0.96 | Yes |
| Bacteria | Tenericutes     | Mollicutes            | Anaeroplasmatales     | Anaeroplasmatales     | Anaeroplasmatales     | Anaeroplasmataceae      | 1.50%  | -    | 2.12   | -6.24  | 10.49 | 0.62 | 1.00 | 2.87   | -5.29  | 11.04 | 0.49 | 1.00 | 2.08   | -3.30  | 7.46  | 0.45 | 0.95 | 2.64   | -2.58  | 7.85  | 0.32 | 0.96 | Yes |
| Bacteria | Tenericutes     | Mollicutes            | Entomoplasmatales     | Entomoplasmatales     | Entomoplasmatales     | Entomoplasmataceae      | 1.00%  | -    | 1.45   | -8.72  | 11.62 | 0.78 | 1.00 | 1.32   | -8.60  | 11.24 | 0.79 | 1.00 | -0.16  | -6.70  | 6.38  | 0.96 | 0.98 | -0.25  | -6.58  | 6.09  | 0.94 | 0.99 | Yes |
| Bacteria | Tenericutes     | Mollicutes            | Mycoplasmatales       | Mycoplasmatales       | Mycoplasmatales       | Mycoplasmataceae        | 0.20%  | -    | -3.84  | -26.39 | 18.72 | 0.74 | 1.00 | -1.04  | -23.06 | 20.98 | 0.93 | 1.00 | -17.04 | -31.50 | -2.58 | 0.02 | 0.95 | -15.04 | -29.06 | -1.01 | 0.04 | 0.96 | Yes |
| Bacteria | Tenericutes     | Mollicutes            | Mycoplasmatales       | Mycoplasmatales       | Mycoplasmatales       | Mycoplasmataceae        | 3.49%  | -    | -1.38  | -6.93  | 4.16  | 0.62 | 1.00 | -1.93  | -7.34  | 3.49  | 0.48 | 1.00 | 0.79   | -2.78  | 4.35  | 0.66 | 0.95 | 0.41   | -3.04  | 3.87  | 0.81 | 0.97 | Yes |
| Bacteria | Tenericutes     | Mollicutes            | Mycoplasmatales       | Mycoplasmatales       | Mycoplasmatales       | Mycoplasmataceae        | 0.80%  | -    | 5.52   | -5.87  | 16.90 | 0.34 | 1.00 | 5.18   | -5.93  | 16.29 | 0.36 | 1.00 | 0.41   | -6.91  | 7.74  | 0.91 | 0.97 | 0.18   | -6.92  | 7.27  | 0.96 | 0.99 | Yes |
| Bacteria | Tenericutes     | Mollicutes            | Mycoplasmatales       | Mycoplasmatales       | Mycoplasmatales       | Mycoplasmataceae        | 0.10%  | -    | -9.17  | -41.17 | 22.83 | 0.57 | 1.00 | -2.70  | -33.97 | 28.58 | 0.87 | 1.00 | -8.85  | -29.42 | 11.72 | 0.40 | 0.95 | -4.19  | -24.16 | 15.77 | 0.68 | 0.96 | Yes |
| Bacteria | Tenericutes     | Mollicutes            | RF39†                 |                       |                       |                         | 2.02   | 0.58 | -0.30  | -2.09  | 1.48  | 0.74 | 1.00 | -0.02  | -1.77  | 1.72  | 0.98 | 1.00 | -0.45  | -1.60  | 0.70  | 0.44 | 0.95 | -0.24  | -1.35  | 0.88  | 0.68 | 0.96 | No  |
| Bacteria | Tenericutes     | Mollicutes            | RsaHF231              |                       |                       |                         | 0.50%  | -    | 0.74   | -13.76 | 15.24 | 0.92 | 1.00 | -1.63  | -15.79 | 12.53 | 0.82 | 1.00 | 4.86   | -4.46  | 14.17 | 0.31 | 0.95 | 3.18   | -5.85  | 12.22 | 0.49 | 0.96 | Yes |
| Bacteria | Tenericutes     | Mollicutes            |                       |                       |                       |                         | 3.89%  | -    | -0.26  | -5.53  | 5.01  | 0.92 | 1.00 | -0.30  | -5.45  | 4.84  | 0.91 | 1.00 | -0.70  | -4.09  | 2.69  | 0.68 | 0.95 | -0.72  | -4.00  | 2.57  | 0.67 | 0.96 | Yes |
| Bacteria | Tenericutes     | RF3                   | ML615J-28             |                       |                       |                         | 6.48%  | -    | -1.35  | -5.49  | 2.78  | 0.52 | 1.00 | -1.17  | -5.20  | 2.87  | 0.57 | 1.00 | -1.19  | -3.84  | 1.47  | 0.38 | 0.95 | -1.03  | -3.60  | 1.54  | 0.43 | 0.96 | Yes |
| Bacteria | Thermotogae     | Thermotogae           | Thermotogales         | Thermotogales         | Thermotogales         | Thermotogaceae          | 0.10%  | -    | -9.37  | -41.32 | 22.59 | 0.57 | 1.00 | -2.51  | -33.75 | 28.72 | 0.87 | 1.00 | -5.13  | -25.67 | 15.41 | 0.62 | 0.95 | -0.24  | -20.18 | 19.70 | 0.98 | 1.00 | Yes |
| Bacteria | TM6             | SBRH58                |                       |                       |                       |                         | 0.40%  | -    | 5.56   | -10.49 | 21.62 | 0.50 | 1.00 | 2.96   | -12.73 | 18.64 | 0.71 | 1.00 | 8.72   | -1.58  | 19.03 | 0.10 | 0.95 | 6.91   | -3.09  | 16.91 | 0.18 | 0.96 | Yes |
| Bacteria | TM6             | SJA-4                 |                       |                       |                       |                         | 0.40%  | -    | -17.58 | -33.68 | -1.47 | 0.03 | 0.99 | -16.10 | -31.82 | -0.38 | 0.04 | 1.00 | -11.15 | -21.50 | -0.80 | 0.03 | 0.95 | -10.06 | -20.10 | -0.02 | 0.05 | 0.96 | Yes |
| Bacteria | TM7             | TM7-1                 |                       |                       |                       |                         | 0.20%  | -    | -12.60 | -35.30 | 10.09 | 0.28 | 1.00 | -13.66 | -35.80 | 8.48  | 0.23 | 1.00 | -6.27  | -20.86 | 8.33  | 0.40 | 0.95 | -6.99  | -21.13 | 7.15  | 0.33 | 0.96 | Yes |
| Bacteria | TM7             | TM7-3                 | CW040                 |                       | F16                   |                         | 5.58%  | -    | -0.53  | -4.99  | 3.93  | 0.82 | 1.00 | -1.10  | -5.45  | 3.25  | 0.62 | 1.00 | 0.44   | -2.43  | 3.31  | 0.76 | 0.96 | 0.05   | -2.73  | 2.83  | 0.97 | 0.99 | Yes |
| Bacteria | TM7             | TM7-3                 | CW040                 |                       |                       |                         | 13.16% | -    | 2.65   | -0.34  | 5.64  | 0.08 | 0.99 | 2.64   | -0.28  | 5.55  | 0.08 | 1.00 | 0.91   | -1.01  | 2.84  | 0.35 | 0.95 | 0.92   | -0.95  | 2.78  | 0.34 | 0.96 | Yes |
| Bacteria | TM7             | TM7-3                 | EW055                 |                       |                       |                         | 0.90%  | -    | -3.86  | -14.57 | 6.85  | 0.48 | 1.00 | -4.20  | -14.64 | 6.25  | 0.43 | 1.00 | 0.98   | -5.90  | 7.87  | 0.78 | 0.96 | 0.75   | -5.93  | 7.42  | 0.83 | 0.97 | Yes |
| Bacteria | TM7             | TM7-3                 | I025                  |                       | Rs-045                |                         | 11.86% | -    | 2.66   | -0.46  | 5.78  | 0.09 | 1.00 | 2.29   | -0.76  | 5.33  | 0.14 | 1.00 | 2.19   | 0.19   | 4.19  | 0.03 | 0.95 | 1.93   | -0.01  | 3.88  | 0.05 | 0.96 | Yes |
| Bacteria | TM7             | TM7-3                 | I025                  |                       |                       |                         | 0.90%  | -    | -3.17  | -13.93 | 7.60  | 0.56 | 1.00 | -4.75  | -15.26 | 5.76  | 0.37 | 1.00 | -2.68  | -9.60  | 4.24  | 0.45 | 0.95 | -3.82  | -10.53 | 2.89  | 0.26 | 0.96 | Yes |
| Bacteria | TM7             | TM7-3                 |                       |                       |                       |                         | 0.43   | 0.37 | 2.09   | -0.65  | 4.82  | 0.14 | 1.00 | 2.28   | -0.39  | 4.95  | 0.09 | 1.00 | 0.67   | -1.09  | 2.43  | 0.46 | 0.95 | 0.81   | -0.90  | 2.52  | 0.35 | 0.96 | No  |
| Bacteria | TM7             | TM7-3                 |                       |                       |                       |                         | 0.20%  | -    | -12.60 | -35.30 | 10.09 | 0.28 | 1.00 | -13.66 | -35.80 | 8.48  | 0.23 | 1.00 | -6.27  | -20.86 | 8.33  | 0.40 | 0.95 | -6.99  | -21.13 | 7.15  | 0.33 | 0.96 | Yes |
| Bacteria | TPD-58          |                       |                       |                       |                       |                         | 0.20%  | -    | -1.39  | -24.06 | 21.29 | 0.90 | 1.00 | -2.78  | -24.91 | 19.34 | 0.80 | 1.00 | 2.62   | -11.96 | 17.19 | 0.72 | 0.96 | 1.62   | -12.50 | 15.74 | 0.82 | 0.97 | Yes |
| Bacteria | Verrucomicrobia | [Methylacidiphilae]   | Methylacidiphilales   | Methylacidiphilales   | Methylacidiphilales   | LD19                    | 0.10%  | -    | 7.29   | -24.67 | 39.26 | 0.65 | 1.00 | 7.29   | -23.89 | 38.48 | 0.65 | 1.00 | -0.08  | -20.63 | 20.47 | 0.99 | 1.00 | -0.11  | -20.02 | 19.80 | 0.99 | 1.00 | Yes |
| Bacteria | Verrucomicrobia | [Pedosphaerae]        | [Pedosphaerales]      | [Pedosphaerales]      | [Pedosphaerales]      | Pedosphaera             | 0.30%  | -    | 12.58  | -6.05  | 31.21 | 0.19 | 1.00 | 7.92   | -10.31 | 26.14 | 0.39 | 1.00 | -1.29  | -13.28 | 10.69 | 0.83 | 0.96 | -4.68  | -16.32 | 6.96  | 0.43 | 0.96 | Yes |
| Bacteria | Verrucomicrobia | [Pedosphaerae]        | [Pedosphaerales]      | [Pedosphaerales]      | [Pedosphaerales]      | auto67_4W               | 0.50%  | -    | -4.81  | -19.15 | 9.52  | 0.51 | 1.00 | -5.87  | -19.86 | 8.12  | 0.41 | 1.00 | -2.48  | -11.69 | 6.74  | 0.60 | 0.95 | -3.20  | -12.13 | 5.73  | 0.48 | 0.96 | Yes |
| Bacteria | Verrucomicrobia | [Pedosphaerae]        | [Pedosphaerales]      | [Pedosphaerales]      | [Pedosphaerales]      | Ellin515                | 1.10%  | -    | 4.39   | -5.39  | 14.18 | 0.38 | 1.00 | 1.24   | -8.35  | 10.83 | 0.80 | 1.00 | 1.58   | -4.72  | 7.87  | 0.62 | 0.95 | -0.68  | -6.80  | 5.44  | 0.83 | 0.97 | Yes |
| Bacteria | Verrucomicrobia | [Pedosphaerae]        | [Pedosphaerales]      | [Pedosphaerales]      | [Pedosphaerales]      | Ellin517                | 0.50%  | -    | -3.68  | -18.01 | 10.65 | 0.61 | 1.00 | -4.22  | -18.20 | 9.76  | 0.55 | 1.00 | -3.57  | -12.78 | 5.65  | 0.45 | 0.95 | -3.94  | -12.86 | 4.98  | 0.39 | 0.96 | Yes |
| Bacteria | Verrucomicrobia | [Pedosphaerae]        | [Pedosphaerales]      | [Pedosphaerales]      | [Pedosphaerales]      | OPB35                   | 0.10%  | -    | -13.84 | -45.92 | 18.23 | 0.40 | 1.00 | -16.09 | -47.39 | 15.21 | 0.31 | 1.00 | -5.98  | -26.61 | 14.64 | 0.57 | 0.95 | -7.57  | -27.55 | 12.42 | 0.46 | 0.96 | Yes |
| Bacteria | Verrucomicrobia | [Pedosphaerae]        | [Pedosphaerales]      | [Pedosphaerales]      | [Pedosphaerales]      | R4-41B                  | 0.50%  | -    | -5.92  | -20.35 | 8.51  | 0.42 | 1.00 | -6.10  | -20.18 | 7.99  | 0.40 | 1.00 | -1.78  | -11.06 | 7.50  | 0.71 | 0.95 | -1.87  | -10.87 | 7.12  | 0.68 | 0.96 | Yes |
| Bacteria | Verrucomicrobia | [Pedosphaerae]        | [Pedosphaerales]      | [Pedosphaerales]      | [Pedosphaerales]      |                         | 0.50%  | -    | -11.82 | -26.11 | 2.47  | 0.10 | 1.00 | -12.81 | -26.75 | 1.13  | 0.07 | 1.00 | -2.39  | -11.59 | 6.80  | 0.61 | 0.95 | -3.11  | -12.02 | 5.81  | 0.49 | 0.96 | Yes |
| Bacteria | Verrucomicrobia | [Chthoniobacteriales] | [Chthoniobacteriales] | [Chthoniobacteriales] | [Chthoniobacteriales] | Candidatus Xiphi        | 0.70%  | -    | -2.90  | -15.05 | 9.26  | 0.64 | 1.00 | -3.29  | -15.15 | 8.56  | 0.59 | 1.00 | -3.02  | -10.83 | 4.79  | 0.45 | 0.95 | -3.29  | -10.86 | 4.27  | 0.39 | 0.96 | Yes |
| Bacteria | Verrucomicrobia | [Spartobacteria]      | [Chthoniobacteriales] | [Chthoniobacteriales] | [Chthoniobacteriales] | Chthoniobacter          | 0.30%  | -    | 2.81   | -15.70 | 21.31 | 0.77 | 1    |        |        |       |      |      |        |        |       |      |      |        |        |       |      |      |     |

**Table S7. Post-hoc analysis of the associations between gut microbial within-person diversity ( $\alpha$ -diversity) measures with systolic and diastolic blood pressure (SBP and DBP)**

|                | Mean (SD)     | SBP                          |         | DBP                          |         |
|----------------|---------------|------------------------------|---------|------------------------------|---------|
|                |               | $\beta$ Coefficient (95% CI) | P value | $\beta$ Coefficient (95% CI) | P value |
| Shannon index* | 2.59 (0.30)   | 0.80 (-2.59, 4.19)           | 0.64    | -0.57 (-2.76, 1.62)          | 0.61    |
| Richness†      | 99.14 (27.51) | 0.01 (-0.03, 0.04)           | 0.71    | -0.002 (-0.03, 0.02)         | 0.88    |

n=1,003. Model was adjusted for age, sex, provinces, urbanization index (tertiles:  $\leq 58.8$ , 58.8-78.8,  $>78.8$ ), per capita household income (tertiles:  $\leq 7.2$ , 7.2-18,  $>18$ ), education, total energy intake, animal-source food consumption, sodium consumption, physical activity (tertiles:  $\leq 75$ , 75-192,  $>192$ ), smoking, alcohol intake, estimated glomerular filtration rate (eGFR), and low-density lipoprotein cholesterol.

\*Shannon index at genus level was calculated using  $-\sum p_i \ln p_i$ , where  $p_i$  is the proportional abundance of genera  $i$ .

†Richness measured the number of distinct genera per subject with rarefaction.

**Table S8. Post-hoc analysis of the association between gut microbial principal coordinates analysis (PCoA) axes with systolic and diastolic blood pressure (SBP and DBP, mmHg), Coefficient (95% CI)**

| Taxa contributing to each axis |                                 |                              | Eigen-value | Variance explained | SBP              | DBP             |
|--------------------------------|---------------------------------|------------------------------|-------------|--------------------|------------------|-----------------|
| MDS1                           | <i>Prevotella</i>               | <i>Bacteroides</i>           | 4.91        | 8.61%              | 13.67            | 1.18            |
|                                | <i>Ralstonia</i>                | <i>Unassigned</i>            |             |                    | (-19.51, 46.85)  | (-20.27, 22.63) |
|                                | <i>S24-7</i>                    | <i>Comamonadaceae</i>        |             |                    |                  |                 |
|                                | <i>Delftia</i>                  | <i>Rikenellaceae</i>         |             |                    |                  |                 |
|                                | <i>Parabacteroides</i>          | <i>RF39</i>                  |             |                    |                  |                 |
| MDS 2                          | <i>Ralstonia</i>                | <i>Akkermansia</i>           | 3.18        | 5.58%              | 4.44             | -5.64           |
|                                | <i>Delftia</i>                  | <i>Comamonadaceae</i>        |             |                    | (-28.36, 37.24)  | (-26.83, 15.56) |
|                                | <i>Bacteroides</i>              | <i>Prevotella</i>            |             |                    |                  |                 |
|                                | <i>Lachnospira</i>              | <i>Lactococcus</i>           |             |                    |                  |                 |
|                                | <i>Faecalibacterium</i>         | <i>Phascolarctobacterium</i> |             |                    |                  |                 |
| MDS3                           | <i>Lactococcus</i>              | <i>YS2</i>                   | 2.02        | 3.54%              | -6.99            | 0.04            |
|                                | <i>Eggerthella</i>              | <i>Bifidobacterium</i>       |             |                    | (-52.17, 38.19)  | (-29.16, 29.23) |
|                                | <i>Catenibacterium</i>          | <i>Peptococcus</i>           |             |                    |                  |                 |
|                                | <i>Leuconostocaceae</i>         | <i>Adlercreutzia</i>         |             |                    |                  |                 |
|                                | <i>Pseudoramibacter_</i>        | <i>Fusobacterium</i>         |             |                    |                  |                 |
|                                | <i>Eubacterium</i>              |                              |             |                    |                  |                 |
| MDS4                           | <i>Adlercreutzia</i>            | <i>Rothia</i>                | 1.80        | 3.16%              | 55.78            | 17.92           |
|                                | <i>Enterobacteriaceae_other</i> | <i>Fusobacterium</i>         |             |                    | (18.85, 92.71)** | (-6.03, 41.87)  |
|                                | <i>Leuconostocaceae</i>         | <i>Coprococcus</i>           |             |                    |                  |                 |
|                                | <i>Serratia</i>                 | <i>Eggerthella</i>           |             |                    |                  |                 |
|                                | <i>Enterobacteriaceae</i>       | <i>Ralstonia</i>             |             |                    |                  |                 |

MDS, multidimensional scaling. PCo were derived from PCoA of 1,008 taxa based on Bray-Curtis distance matrix in microbiota analysis sample (n=1,003). Coefficient indicates SBP and DBP (mmHg) associated with each 1 unit increase in microbiota pattern score. Contributing taxa include taxa with the top 10 highest absolute scores for the respective PCo. Taxa are vertically ordered by their absolute values of scores (descending). A full list of scores is shown in Table S1. Model was adjusted for age, sex, provinces, urbanization index (tertiles: ≤58.8, 58.8-78.8, >78.8), per capita household income (tertiles: ≤7.2, 7.2-18, >18), education, total energy intake, animal-source food consumption, sodium consumption, physical activity (tertiles: ≤75, 75-192, >192), smoking, alcohol intake, estimated glomerular filtration rate (eGFR), and low-density lipoprotein cholesterol. “\*\*” indicates p-value < 0.05; “\*\*\*” indicates p-value<0.01. The association between the overall gut microbiota with SBP (p-value=0.001) and DBP (p-value=0.009) was assessed by permutational multivariate analysis of variance (PERMANOVA) with 999 permutations.

Table S9. Post-hoc analysis of the association between specific taxa with systolic and diastolic blood pressure (SBP and DBP)

| Kingdom  | Phylum          | Class                | Order              | Family                     | Genus                     | Mean(SD) or % | SBP   |        |         |         |        | DBP    |         |         |       |      |      |     |
|----------|-----------------|----------------------|--------------------|----------------------------|---------------------------|---------------|-------|--------|---------|---------|--------|--------|---------|---------|-------|------|------|-----|
|          |                 |                      |                    |                            |                           |               | Coef. | 95% CI | p-value | q-value | Coef.  | 95% CI | p-value | q-value | Rare  |      |      |     |
| Archaea  | [Parvarchaeota] | [Parvarchaea]        | WCHD3-30           |                            |                           | 0.10% -       |       | -10.97 | -42.66  | 20.71   | 0.50   | 1.00   | -3.93   | -24.40  | 16.55 | 0.71 | 1.00 | Yes |
| Archaea  | Crenarchaeota   | Thaumarchaeota       | Cenarchaeales      | Cenarchaeaceae             | Nitrosopumilus            | 0.20% -       |       | 20.51  | -1.94   | 42.96   | 0.07   | 0.99   | 14.58   | 0.08    | 29.09 | 0.05 | 1.00 | Yes |
| Archaea  | Crenarchaeota   | Thaumarchaeota       | Nitrososphaerales  | Nitrososphaeraceae         | Candidatus Nitrososphaera | 0.60% -       |       | -0.47  | -13.42  | 12.48   | 0.94   | 1.00   | -2.82   | -11.18  | 5.55  | 0.51 | 1.00 | Yes |
| Archaea  | Euryarchaeota   | Halobacteria         | Halobacteriales    | Halobacteriaceae           | Halococcus                | 0.20% -       |       | -16.22 | -38.67  | 6.23    | 0.16   | 1.00   | -6.81   | -21.33  | 7.70  | 0.36 | 1.00 | Yes |
| Archaea  | Euryarchaeota   | Methanobacteria      | Methanobacteriales | Methanobacteriaceae        | Methanobrevibacter        | 0.32          | 0.55  | -0.29  | -2.12   | 1.55    | 0.76   | 1.00   | 0.22    | -0.97   | 1.41  | 0.72 | 1.00 | No  |
| Archaea  | Euryarchaeota   | Methanobacteria      | Methanobacteriales | Methanobacteriaceae        | Methanosphaera            | 0.22          | 0.47  | 0.22   | -1.99   | 2.42    | 0.85   | 1.00   | 0.34    | -1.08   | 1.76  | 0.64 | 1.00 | No  |
| Archaea  | Euryarchaeota   | Thermoplasmata       | E2                 | [Methanomassiliicoccaceae] | vadinCA11                 | 0.20% -       |       | 16.06  | -6.30   | 38.42   | 0.16   | 1.00   | 8.88    | -5.57   | 23.34 | 0.23 | 1.00 | Yes |
| Bacteria | [Caldithrix]    | KSB1                 | Ucn15732           |                            |                           | 1.00% -       |       | 3.18   | -6.86   | 13.22   | 0.53   | 1.00   | 0.59    | -5.90   | 7.08  | 0.86 | 1.00 | Yes |
| Bacteria | [Thermi]        | Deinococci           | Deinococcales      | Deinococcaceae             | Deinococcus               | 2.19% -       |       | 3.21   | -3.66   | 10.08   | 0.36   | 1.00   | 1.41    | -3.03   | 5.85  | 0.53 | 1.00 | Yes |
| Bacteria | [Thermi]        | Deinococci           | Deinococcales      | Trueperaceae               | B-42                      | 1.40% -       |       | -4.29  | -12.87  | 4.29    | 0.33   | 1.00   | -2.91   | -8.45   | 2.64  | 0.30 | 1.00 | Yes |
| Bacteria | [Thermi]        | Deinococci           | Deinococcales      | Trueperaceae               | Truepera                  | 0.30% -       |       | 1.04   | -17.26  | 19.33   | 0.91   | 1.00   | 3.42    | -8.40   | 15.24 | 0.57 | 1.00 | Yes |
| Bacteria | [Thermi]        | Deinococci           | Thermales          | Thermaceae                 | Meiothermus               | 0.10% -       |       | 0.71   | -30.99  | 32.42   | 0.96   | 1.00   | 5.07    | -15.42  | 25.56 | 0.63 | 1.00 | Yes |
| Bacteria | [Thermi]        | Deinococci           | Thermales          | Thermaceae                 | Thermus                   | 1.99% -       |       | 4.55   | -2.55   | 11.66   | 0.21   | 1.00   | 1.69    | -2.91   | 6.28  | 0.47 | 1.00 | Yes |
| Bacteria | Acidobacteria   | [Chloracidobacteria] | PK29               |                            |                           | 0.60% -       |       | 8.52   | -13.95  | 30.99   | 0.46   | 1.00   | 5.18    | -9.34   | 19.70 | 0.48 | 1.00 | Yes |
| Bacteria | Acidobacteria   | [Chloracidobacteria] | RB41               | Ellin6075                  |                           | 3.49% -       |       | -5.70  | -18.73  | 7.34    | 0.39   | 1.00   | -2.03   | -10.46  | 6.39  | 0.64 | 1.00 | Yes |
| Bacteria | Acidobacteria   | [Chloracidobacteria] | RB41               |                            |                           | 1.99% -       |       | 0.10   | -5.42   | 5.62    | 0.97   | 1.00   | -1.31   | -4.88   | 2.26  | 0.47 | 1.00 | Yes |
| Bacteria | Acidobacteria   | [Chloracidobacteria] |                    |                            |                           | 0.20% -       |       | -2.33  | -9.54   | 4.88    | 0.53   | 1.00   | -5.98   | -10.62  | -1.34 | 0.01 | 1.00 | Yes |
| Bacteria | Acidobacteria   | Acidobacteria-5      |                    |                            |                           | 1.00% -       |       | 0.12   | -9.92   | 10.17   | 0.98   | 1.00   | -1.42   | -7.91   | 5.08  | 0.67 | 1.00 | Yes |
| Bacteria | Acidobacteria   | Acidobacteria-6      | CCU21              |                            |                           | 0.30% -       |       | -1.02  | -19.33  | 17.29   | 0.91   | 1.00   | -2.83   | -14.66  | 9.00  | 0.64 | 1.00 | Yes |
| Bacteria | Acidobacteria   | Acidobacteria-6      | iii1-15            | mb2424                     |                           | 1.20% -       |       | -0.75  | -10.08  | 8.57    | 0.87   | 1.00   | 0.12    | -5.91   | 6.15  | 0.97 | 1.00 | Yes |
| Bacteria | Acidobacteria   | Acidobacteria-6      | iii1-15            | RB40                       |                           | 0.70% -       |       | 9.28   | -2.73   | 21.29   | 0.13   | 1.00   | 4.93    | -2.84   | 12.69 | 0.21 | 1.00 | Yes |
| Bacteria | Acidobacteria   | Acidobacteria-6      | iii1-15            |                            |                           | 4.69% -       |       | 1.24   | -3.57   | 6.06    | 0.61   | 1.00   | 0.21    | -2.90   | 3.32  | 0.90 | 1.00 | Yes |
| Bacteria | Acidobacteria   | Acidobacteria        | Acidobacteriales   | Acidobacteriaceae          | Edaphobacter              | 0.20% -       |       | 0.42   | -22.05  | 22.88   | 0.97   | 1.00   | -11.34  | -25.84  | 3.16  | 0.13 | 1.00 | Yes |
| Bacteria | Acidobacteria   | Acidobacteria        | Acidobacteriales   | Acidobacteriaceae          | Terriglobus               | 0.60% -       |       | 15.46  | 2.41    | 28.51   | 0.02   | 0.99   | 7.40    | -1.05   | 15.84 | 0.09 | 1.00 | Yes |
| Bacteria | Acidobacteria   | Acidobacteria        | Acidobacteriales   | Acidobacteriaceae          |                           | 0.80% -       |       | 5.99   | -5.24   | 17.21   | 0.30   | 1.00   | 3.81    | -3.45   | 11.06 | 0.30 | 1.00 | Yes |
| Bacteria | Acidobacteria   | Acidobacteria        | Acidobacteriales   | Koribacteraceae            | Candidatus Koribacter     | 2.09% -       |       | 2.59   | -4.45   | 9.63    | 0.47   | 1.00   | 0.36    | -4.19   | 4.91  | 0.88 | 1.00 | Yes |
| Bacteria | Acidobacteria   | Acidobacteria        | Acidobacteriales   | Koribacteraceae            |                           | 2.79% -       |       | 4.16   | -1.93   | 10.25   | 0.18   | 1.00   | 1.45    | -2.48   | 5.39  | 0.47 | 1.00 | Yes |
| Bacteria | Acidobacteria   | DA052                | Ellin6513          |                            |                           | 1.99% -       |       | 1.54   | -5.64   | 8.71    | 0.67   | 1.00   | -0.08   | -4.72   | 4.55  | 0.97 | 1.00 | Yes |
| Bacteria | Acidobacteria   | Holophagae           | Holophagales       |                            |                           | 0.30% -       |       | 6.32   | -12.02  | 24.65   | 0.50   | 1.00   | 9.10    | -2.74   | 20.94 | 0.13 | 1.00 | Yes |
| Bacteria | Acidobacteria   | iii1-8               | 32-20              |                            |                           | 0.70% -       |       | -5.37  | -17.47  | 6.74    | 0.38   | 1.00   | -7.07   | -14.89  | 0.74  | 0.08 | 1.00 | Yes |
| Bacteria | Acidobacteria   | iii1-8               | DS-18              |                            |                           | 1.60% -       |       | -4.69  | -12.75  | 3.36    | 0.25   | 1.00   | -3.74   | -8.95   | 1.46  | 0.16 | 1.00 | Yes |
| Bacteria | Acidobacteria   | PAUC37f              |                    |                            |                           | 0.20% -       |       | 3.77   | -18.65  | 26.19   | 0.74   | 1.00   | 5.13    | -9.35   | 19.62 | 0.49 | 1.00 | Yes |
| Bacteria | Acidobacteria   | RB25                 |                    |                            |                           | 0.10% -       |       | -15.68 | -47.27  | 15.91   | 0.33   | 1.00   | -16.31  | -36.71  | 4.09  | 0.12 | 1.00 | Yes |
| Bacteria | Acidobacteria   | Solibacteres         | JH-WHS99           |                            |                           | 0.10% -       |       | 0.53   | -31.08  | 32.14   | 0.97   | 1.00   | 12.48   | -7.93   | 32.89 | 0.23 | 1.00 | Yes |
| Bacteria | Acidobacteria   | Solibacteres         | Solibacterales     | PAUC26f                    |                           | 0.20% -       |       | -0.88  | -23.29  | 21.54   | 0.94   | 1.00   | 2.01    | -12.47  | 16.50 | 0.79 | 1.00 | Yes |
| Bacteria | Acidobacteria   | Solibacteres         | Solibacterales     | Solibacteraceae            | Candidatus Solibacter     | 0.80% -       |       | -7.99  | -19.34  | 3.37    | 0.17   | 1.00   | -8.61   | -15.93  | -1.29 | 0.02 | 1.00 | Yes |
| Bacteria | Acidobacteria   | Solibacteres         | Solibacterales     | Solibacteraceae            |                           | 0.30% -       |       | 2.39   | -15.95  | 20.74   | 0.80   | 1.00   | 3.68    | -8.18   | 15.53 | 0.54 | 1.00 | Yes |
| Bacteria | Acidobacteria   | Solibacteres         | Solibacterales     |                            |                           | 2.19% -       |       | -0.04  | -6.92   | 6.83    | 0.99   | 1.00   | -0.06   | -4.50   | 4.38  | 0.98 | 1.00 | Yes |
| Bacteria | Acidobacteria   | Sva0725              | Sva0725            |                            |                           | 0.60% -       |       | -0.39  | -13.43  | 12.65   | 0.95   | 1.00   | -2.14   | -10.56  | 6.29  | 0.62 | 1.00 | Yes |
| Bacteria | Acidobacteria   |                      |                    |                            |                           | 0.30% -       |       | -8.02  | -26.47  | 10.42   | 0.39   | 1.00   | -2.04   | -13.96  | 9.88  | 0.74 | 1.00 | Yes |
| Bacteria | Actinobacteria  | Acidimicrobia        | Acidimicrobiales   | AKIW874                    |                           | 0.30% -       |       | -11.54 | -29.89  | 6.81    | 0.22   | 1.00   | -3.86   | -15.73  | 8.00  | 0.52 | 1.00 | Yes |
| Bacteria | Actinobacteria  | Acidimicrobia        | Acidimicrobiales   | C111                       |                           | 2.09% -       |       | -2.53  | -9.59   | 4.53    | 0.48   | 1.00   | -1.27   | -5.84   | 3.29  | 0.58 | 1.00 | Yes |
| Bacteria | Actinobacteria  | Acidimicrobia        | Acidimicrobiales   | EB1017                     |                           | 0.30% -       |       | 14.85  | -3.40   | 33.10   | 0.11   | 1.00   | 9.43    | -2.37   | 21.22 | 0.12 | 1.00 | Yes |
| Bacteria | Actinobacteria  | Acidimicrobia        | Acidimicrobiales   | Iamiaceae                  | Iamia                     | 0.70% -       |       | -4.45  | -16.51  | 7.62    | 0.47   | 1.00   | -2.24   | -10.04  | 5.56  | 0.57 | 1.00 | Yes |
| Bacteria | Actinobacteria  | Acidimicrobia        | Acidimicrobiales   | koll13                     |                           | 0.70% -       |       | 5.58   | -6.57   | 17.72   | 0.37   | 1.00   | 3.45    | -4.41   | 11.30 | 0.39 | 1.00 | Yes |
| Bacteria | Actinobacteria  | Acidimicrobia        | Acidimicrobiales   | Microthrixaceae            |                           | 0.20% -       |       | 23.33  | 1.00    | 45.66   | 0.04   | 0.99   | 8.37    | -6.08   | 22.82 | 0.26 | 1.00 | Yes |
| Bacteria | Actinobacteria  | Acidimicrobia        | Acidimicrobiales   | OCS155                     |                           | 0.80% -       |       | 3.61   | -7.61   | 14.83   | 0.53   | 1.00   | 6.28    | -0.96   | 13.52 | 0.09 | 1.00 | Yes |
| Bacteria | Actinobacteria  | Acidimicrobia        | Acidimicrobiales   | Other                      | Other                     | 0.20% -       |       | -13.60 | -36.05  | 8.86    | 0.23   | 1.00   | -6.73   | -21.25  | 7.78  | 0.36 | 1.00 | Yes |
| Bacteria | Actinobacteria  | Acidimicrobia        | Acidimicrobiales   | ZA3409c                    |                           | 0.10% -       |       | 0.22   | -31.53  | 31.96   | 0.99   | 1.00   | 4.26    | -16.25  | 24.77 | 0.68 | 1.00 | Yes |
| Bacteria | Actinobacteria  | Acidimicrobia        | Acidimicrobiales   |                            |                           | 3.39% -       |       | 3.11   | -2.46   | 8.69    | 0.27   | 1.00   | 0.74    | -2.86   | 4.35  | 0.69 | 1.00 | Yes |
| Bacteria | Actinobacteria  | Actinobacteria       | Actinomycetales    | ACK-M1                     |                           | 1.69% -       |       | -0.14  | -7.88   | 7.61    | 0.97   | 1.00   | 2.38    | -2.62   | 7.39  | 0.35 | 1.00 | Yes |
| Bacteria | Actinobacteria  | Actinobacteria       | Actinomycetales    | Actinomycetaceae           | Actinomyces               | 1.37          | 0.29  | 3.94   | 0.40    | 7.48    | 0.03   | 0.99   | 1.93    | -0.36   | 4.21  | 0.10 | 1.00 | No  |
| Bacteria | Actinobacteria  | Actinobacteria       | Actinomycetales    | Actinomycetaceae           | Arcanobacterium           | 0.50% -       |       | -16.65 | -30.82  | -2.47   | 0.02   | 0.99   | -8.48   | -17.65  | 0.69  | 0.07 | 1.00 | Yes |
| Bacteria | Actinobacteria  | Actinobacteria       | Actinomycetales    | Actinomycetaceae           | Mobiluncus                | 6.88% -       |       | 1.11   | -2.84   | 5.05    | 0.58   | 1.00   | 0.41    | -2.14   | 2.96  | 0.75 | 1.00 | Yes |
| Bacteria | Actinobacteria  | Actinobacteria       | Actinomycetales    | Actinomycetaceae           | N09                       | 0.60% -       |       | -6.49  | -19.49  | 6.51    | 0.33   | 1.00   | -3.37   | -11.77  | 5.04  | 0.43 | 1.00 | Yes |
| Bacteria | Actinobacteria  | Actinobacteria       | Actinomycetales    | Actinomycetaceae           | Other                     | 0.10% -       |       | 10.47  | -21.19  | 42.14   | 0.52   | 1.00   | 9.42    | -11.05  | 29.88 | 0.37 | 1.00 | Yes |
| Bacteria | Actinobacteria  | Actinobacteria       | Actinomycetales    | Actinomycetaceae           | Trueperella               | 0.50% -       |       | 0.05   | -14.19  | 14.29   | 0.99   | 1.00   | -0.70   | -9.90   | 8.50  | 0.88 | 1.00 | Yes |
| Bacteria | Actinobacteria  | Actinobacteria       | Actinomycetales    | Actinomycetaceae           | Varibaculum               | 5.18% -       |       | -2.85  | -7.37   | 1.67    | 0.22   | 1.00   | 0.39    | -2.53   | 3.31  | 0.79 | 1.00 | Yes |
| Bacteria | Actinobacteria  | Actinobacteria       | Actinomycetales    | Actinomycetaceae           |                           | 0.25          | 0.26  | -0.58  | -4.48   | 3.31    | 0.77   | 1.00   | -1.35   | -3.86   | 1.17  | 0.29 | 1.00 | No  |
| Bacteria | Actinobacteria  | Actinobacteria       | Actinomycetales    | Actinospicaceae            |                           | 0.20% -       |       | 3.96   | -18.48  | 26.41   | 0.73   | 1.00   | 8.86    | -5.63   | 23.36 | 0.23 | 1.00 | Yes |
| Bacteria | Actinobacteria  | Actinobacteria       | Actinomycetales    | Actinosynnemataceae        | Lentzea                   | 0.20% -       |       | 11.03  | -11.58  | 33.63   | 0.34   | 1.00   | 2.91    | -11.70  | 17.52 | 0.70 | 1.00 | Yes |
| Bacteria | Actinobacteria  | Actinobacteria       | Actinomycetales    | Actinosynnemataceae        | Other                     | 0.20% -       |       | 8.52   | -13.95  | 30.99   | 0.46   | 1.00   | 5.18    | -9.34   | 19.70 | 0.48 | 1.00 | Yes |
| Bacteria | Actinobacteria  | Actinobacteria       | Actinomycetales    | Actinosynnemataceae        | Saccharothrix             | 0.20% -       |       | -13.60 | -36.05  | 8.86    | 0.23   | 1.00   | -6.73   | -21.25  | 7.78  | 0.36 | 1.00 | Yes |
| Bacteria | Actinobacteria  | Actinobacteria       | Actinomycetales    | Beutenbergiaceae           | Other                     | 0.20% -       |       | 12.91  | -9.45   | 35.26   | 0.26   | 1.00   | 11.97   | -2.46   | 26.41 | 0.10 | 1.00 | Yes |
| Bacteria | Actinobacteria  | Actinobacteria       | Actinomycetales    | Beutenbergiaceae           | Salana                    | 0.50% -       |       | -7.55  | -21.71  | 6.61    | 0.30</ |        |         |         |       |      |      |     |



|          |                |                |                 |                     |                      |        |      |        |        |       |      |      |        |        |       |      |      |     |
|----------|----------------|----------------|-----------------|---------------------|----------------------|--------|------|--------|--------|-------|------|------|--------|--------|-------|------|------|-----|
| Bacteria | Actinobacteria | Actinobacteria | Actinomycetales | Bogoriellaceae      | Georgenia            | 0.80%  | -    | -9.00  | -20.28 | 2.28  | 0.12 | 1.00 | -3.82  | -11.12 | 3.47  | 0.30 | 1.00 | Yes |
| Bacteria | Actinobacteria | Actinobacteria | Actinomycetales | Brevibacteriaceae   | Brevibacterium       | 11.67% | -    | -2.19  | -5.34  | 0.97  | 0.17 | 1.00 | -1.53  | -3.56  | 0.51  | 0.14 | 1.00 | Yes |
| Bacteria | Actinobacteria | Actinobacteria | Actinomycetales | Cellulomonadaceae   | Cellulomonas         | 2.19%  | -    | 1.15   | -5.72  | 8.03  | 0.74 | 1.00 | -0.20  | -4.64  | 4.24  | 0.93 | 1.00 | Yes |
| Bacteria | Actinobacteria | Actinobacteria | Actinomycetales | Cellulomonadaceae   | Demequina            | 1.99%  | -    | 1.14   | -6.05  | 8.34  | 0.76 | 1.00 | 1.82   | -2.83  | 6.47  | 0.44 | 1.00 | Yes |
| Bacteria | Actinobacteria | Actinobacteria | Actinomycetales | Cellulomonadaceae   | Other                | 0.40%  | -    | -1.97  | -17.92 | 13.98 | 0.81 | 1.00 | -0.86  | -11.17 | 9.45  | 0.87 | 1.00 | Yes |
| Bacteria | Actinobacteria | Actinobacteria | Actinomycetales | Corynebacteriaceae  | Corynebacterium      | 0.51   | 0.33 | 0.93   | -2.11  | 3.97  | 0.55 | 1.00 | 0.25   | -1.71  | 2.22  | 0.80 | 1.00 | No  |
| Bacteria | Actinobacteria | Actinobacteria | Actinomycetales | Dermabacteraceae    | Brachybacterium      | 11.17% | -    | -0.28  | -3.48  | 2.93  | 0.87 | 1.00 | 0.52   | -1.56  | 2.59  | 0.63 | 1.00 | Yes |
| Bacteria | Actinobacteria | Actinobacteria | Actinomycetales | Dermabacteraceae    | Other                | 0.10%  | -    | -5.13  | -36.81 | 26.56 | 0.75 | 1.00 | 11.72  | -8.75  | 32.18 | 0.26 | 1.00 | Yes |
| Bacteria | Actinobacteria | Actinobacteria | Actinomycetales | Dermabacteraceae    | Other                | 3.59%  | -    | -2.41  | -7.83  | 3.01  | 0.38 | 1.00 | -3.05  | -6.55  | 0.45  | 0.09 | 1.00 | Yes |
| Bacteria | Actinobacteria | Actinobacteria | Actinomycetales | Dermacoccaceae      | Dermacoccus          | 4.09%  | -    | -0.24  | -5.30  | 4.82  | 0.93 | 1.00 | -1.37  | -4.64  | 1.90  | 0.41 | 1.00 | Yes |
| Bacteria | Actinobacteria | Actinobacteria | Actinomycetales | Dermatophilaceae    | Dermatophilus        | 11.76% | -    | -1.60  | -4.75  | 1.56  | 0.32 | 1.00 | -0.87  | -2.91  | 1.17  | 0.40 | 1.00 | Yes |
| Bacteria | Actinobacteria | Actinobacteria | Actinomycetales | Dermatophilaceae    | Other                | 1.69%  | -    | -2.38  | -10.18 | 5.43  | 0.55 | 1.00 | -1.09  | -6.13  | 3.96  | 0.67 | 1.00 | Yes |
| Bacteria | Actinobacteria | Actinobacteria | Actinomycetales | Dietziaceae         | Other                | 0.20%  | -    | 3.95   | -18.73 | 26.63 | 0.73 | 1.00 | 5.76   | -8.89  | 20.41 | 0.44 | 1.00 | Yes |
| Bacteria | Actinobacteria | Actinobacteria | Actinomycetales | Frankiaceae         | Other                | 0.20%  | -    | 6.04   | -16.37 | 28.45 | 0.60 | 1.00 | 7.81   | -6.66  | 22.29 | 0.29 | 1.00 | Yes |
| Bacteria | Actinobacteria | Actinobacteria | Actinomycetales | Frankiaceae         | Other                | 0.90%  | -    | 2.95   | -7.70  | 13.60 | 0.59 | 1.00 | 6.00   | -0.87  | 12.87 | 0.09 | 1.00 | Yes |
| Bacteria | Actinobacteria | Actinobacteria | Actinomycetales | Geodermatophilaceae | Geodermatophilus     | 0.70%  | -    | -6.14  | -18.18 | 5.90  | 0.32 | 1.00 | -0.15  | -7.93  | 7.64  | 0.97 | 1.00 | Yes |
| Bacteria | Actinobacteria | Actinobacteria | Actinomycetales | Geodermatophilaceae | Modestobacter        | 1.99%  | -    | -0.93  | -8.12  | 6.26  | 0.80 | 1.00 | -2.57  | -7.21  | 2.08  | 0.28 | 1.00 | Yes |
| Bacteria | Actinobacteria | Actinobacteria | Actinomycetales | Geodermatophilaceae | Other                | 1.30%  | -    | -0.24  | -9.13  | 8.65  | 0.96 | 1.00 | -5.09  | -10.83 | 0.64  | 0.08 | 1.00 | Yes |
| Bacteria | Actinobacteria | Actinobacteria | Actinomycetales | Geodermatophilaceae | Other                | 0.40%  | -    | 10.80  | -5.09  | 26.70 | 0.18 | 1.00 | 8.67   | -1.59  | 18.94 | 0.10 | 1.00 | Yes |
| Bacteria | Actinobacteria | Actinobacteria | Actinomycetales | Gordoniaceae        | Gordonia             | 1.69%  | -    | -1.86  | -9.60  | 5.87  | 0.64 | 1.00 | -1.80  | -6.80  | 3.20  | 0.48 | 1.00 | Yes |
| Bacteria | Actinobacteria | Actinobacteria | Actinomycetales | Intrasporangiaceae  | Arsenicococcus       | 0.10%  | -    | 25.85  | -5.68  | 57.39 | 0.11 | 1.00 | 14.04  | -6.35  | 34.43 | 0.18 | 1.00 | Yes |
| Bacteria | Actinobacteria | Actinobacteria | Actinomycetales | Intrasporangiaceae  | Kytococcus           | 0.10%  | -    | -7.60  | -39.30 | 24.11 | 0.64 | 1.00 | 0.37   | -20.13 | 20.86 | 0.97 | 1.00 | Yes |
| Bacteria | Actinobacteria | Actinobacteria | Actinomycetales | Intrasporangiaceae  | Other                | 8.67%  | -    | -0.30  | -3.86  | 3.26  | 0.87 | 1.00 | -0.41  | -2.71  | 1.89  | 0.73 | 1.00 | Yes |
| Bacteria | Actinobacteria | Actinobacteria | Actinomycetales | Intrasporangiaceae  | Phycococcus          | 1.99%  | -    | -1.55  | -8.71  | 5.62  | 0.67 | 1.00 | -0.38  | -5.01  | 4.25  | 0.87 | 1.00 | Yes |
| Bacteria | Actinobacteria | Actinobacteria | Actinomycetales | Intrasporangiaceae  | Terracoccus          | 0.10%  | -    | -7.60  | -39.29 | 24.10 | 0.64 | 1.00 | -3.99  | -24.47 | 16.49 | 0.70 | 1.00 | Yes |
| Bacteria | Actinobacteria | Actinobacteria | Actinomycetales | Intrasporangiaceae  | Other                | 8.18%  | -    | -2.72  | -6.40  | 0.97  | 0.15 | 1.00 | -1.37  | -3.75  | 1.01  | 0.26 | 1.00 | Yes |
| Bacteria | Actinobacteria | Actinobacteria | Actinomycetales | Jonesiaceae         | Other                | 0.10%  | -    | 27.51  | -4.15  | 59.18 | 0.09 | 1.00 | 9.38   | -11.10 | 29.87 | 0.37 | 1.00 | Yes |
| Bacteria | Actinobacteria | Actinobacteria | Actinomycetales | Kineosporiaceae     | Kineosporia          | 0.20%  | -    | -2.16  | -24.71 | 20.39 | 0.85 | 1.00 | -1.75  | -16.32 | 12.83 | 0.81 | 1.00 | Yes |
| Bacteria | Actinobacteria | Actinobacteria | Actinomycetales | Kineosporiaceae     | Other                | 0.80%  | -    | 6.87   | -4.39  | 18.14 | 0.23 | 1.00 | 4.99   | -2.29  | 12.27 | 0.18 | 1.00 | Yes |
| Bacteria | Actinobacteria | Actinobacteria | Actinomycetales | Kineosporiaceae     | Other                | 1.40%  | -    | 2.03   | -6.65  | 10.70 | 0.65 | 1.00 | -0.56  | -6.17  | 5.04  | 0.84 | 1.00 | Yes |
| Bacteria | Actinobacteria | Actinobacteria | Actinomycetales | Microbacteriaceae   | Agrococcus           | 1.00%  | -    | -5.02  | -15.09 | 5.06  | 0.33 | 1.00 | -2.09  | -8.60  | 4.43  | 0.53 | 1.00 | Yes |
| Bacteria | Actinobacteria | Actinobacteria | Actinomycetales | Microbacteriaceae   | Agromyces            | 1.89%  | -    | -3.25  | -10.67 | 4.17  | 0.39 | 1.00 | -0.81  | -5.60  | 3.99  | 0.74 | 1.00 | Yes |
| Bacteria | Actinobacteria | Actinobacteria | Actinomycetales | Microbacteriaceae   | Candidatus Aquiluna  | 0.40%  | -    | -5.80  | -21.60 | 10.01 | 0.47 | 1.00 | 3.08   | -7.13  | 13.30 | 0.55 | 1.00 | Yes |
| Bacteria | Actinobacteria | Actinobacteria | Actinomycetales | Microbacteriaceae   | Candidatus Rhodoluna | 0.60%  | -    | -8.43  | -21.36 | 4.50  | 0.20 | 1.00 | 0.57   | -7.79  | 8.94  | 0.89 | 1.00 | Yes |
| Bacteria | Actinobacteria | Actinobacteria | Actinomycetales | Microbacteriaceae   | Cryocola             | 7.68%  | -    | -1.37  | -5.16  | 2.42  | 0.48 | 1.00 | -0.53  | -2.98  | 1.92  | 0.67 | 1.00 | Yes |
| Bacteria | Actinobacteria | Actinobacteria | Actinomycetales | Microbacteriaceae   | Curtobacterium       | 4.79%  | -    | -3.21  | -7.92  | 1.49  | 0.18 | 1.00 | -3.27  | -6.30  | -0.23 | 0.04 | 1.00 | Yes |
| Bacteria | Actinobacteria | Actinobacteria | Actinomycetales | Microbacteriaceae   | Frigoribacterium     | 0.20%  | -    | -12.98 | -35.48 | 9.52  | 0.26 | 1.00 | -10.09 | -24.63 | 4.44  | 0.17 | 1.00 | Yes |
| Bacteria | Actinobacteria | Actinobacteria | Actinomycetales | Microbacteriaceae   | Leucobacter          | 12.36% | -    | -0.43  | -3.53  | 2.66  | 0.78 | 1.00 | -0.62  | -2.62  | 1.38  | 0.54 | 1.00 | Yes |
| Bacteria | Actinobacteria | Actinobacteria | Actinomycetales | Microbacteriaceae   | Microbacterium       | 10.67% | -    | 1.57   | -1.67  | 4.80  | 0.34 | 1.00 | -0.07  | -2.16  | 2.02  | 0.95 | 1.00 | Yes |
| Bacteria | Actinobacteria | Actinobacteria | Actinomycetales | Microbacteriaceae   | Other                | 4.79%  | -    | -0.97  | -5.65  | 3.71  | 0.68 | 1.00 | 0.80   | -2.23  | 3.82  | 0.60 | 1.00 | Yes |
| Bacteria | Actinobacteria | Actinobacteria | Actinomycetales | Microbacteriaceae   | Pseudoclavibacter    | 1.69%  | -    | -1.59  | -9.42  | 6.24  | 0.69 | 1.00 | -0.94  | -6.00  | 4.12  | 0.72 | 1.00 | Yes |
| Bacteria | Actinobacteria | Actinobacteria | Actinomycetales | Microbacteriaceae   | Salinibacterium      | 0.80%  | -    | 2.16   | -9.17  | 13.48 | 0.71 | 1.00 | 1.96   | -5.36  | 9.28  | 0.60 | 1.00 | Yes |
| Bacteria | Actinobacteria | Actinobacteria | Actinomycetales | Microbacteriaceae   | Other                | 5.78%  | -    | -1.87  | -6.17  | 2.42  | 0.39 | 1.00 | -0.74  | -3.52  | 2.04  | 0.60 | 1.00 | Yes |
| Bacteria | Actinobacteria | Actinobacteria | Actinomycetales | Micrococcaceae      | Arthrobacter         | 9.97%  | -    | -0.58  | -3.96  | 2.79  | 0.73 | 1.00 | -1.40  | -3.58  | 0.77  | 0.21 | 1.00 | Yes |
| Bacteria | Actinobacteria | Actinobacteria | Actinomycetales | Micrococcaceae      | Kocuria              | 0.15   | 0.27 | 2.95   | -0.87  | 6.77  | 0.13 | 1.00 | 1.50   | -0.97  | 3.96  | 0.23 | 1.00 | No  |
| Bacteria | Actinobacteria | Actinobacteria | Actinomycetales | Micrococcaceae      | Microbispora         | 3.79%  | -    | 0.46   | -4.84  | 5.76  | 0.86 | 1.00 | 0.21   | -3.22  | 3.63  | 0.91 | 1.00 | Yes |
| Bacteria | Actinobacteria | Actinobacteria | Actinomycetales | Micrococcaceae      | Micrococcus          | 13.16% | -    | 2.33   | -0.64  | 5.30  | 0.12 | 1.00 | 1.82   | -0.10  | 3.73  | 0.06 | 1.00 | Yes |
| Bacteria | Actinobacteria | Actinobacteria | Actinomycetales | Micrococcaceae      | Nesterenkonia        | 5.58%  | -    | -0.47  | -4.83  | 3.89  | 0.83 | 1.00 | 1.01   | -1.81  | 3.83  | 0.48 | 1.00 | Yes |
| Bacteria | Actinobacteria | Actinobacteria | Actinomycetales | Micrococcaceae      | Other                | 1.00%  | -    | 0.71   | -9.39  | 10.80 | 0.89 | 1.00 | -1.78  | -8.30  | 4.75  | 0.59 | 1.00 | Yes |
| Bacteria | Actinobacteria | Actinobacteria | Actinomycetales | Micrococcaceae      | Rothia*              | 0.83   | 0.44 | 1.40   | -0.91  | 3.71  | 0.24 | 1.00 | 0.71   | -0.79  | 2.20  | 0.35 | 1.00 | No  |
| Bacteria | Actinobacteria | Actinobacteria | Actinomycetales | Micrococcaceae      | Other                | 22.93% | -    | -0.77  | -3.16  | 1.61  | 0.52 | 1.00 | -0.77  | -2.31  | 0.77  | 0.33 | 1.00 | Yes |
| Bacteria | Actinobacteria | Actinobacteria | Actinomycetales | Micromonosporaceae  | Actinoplanes         | 0.50%  | -    | 2.34   | -11.97 | 16.64 | 0.75 | 1.00 | 2.70   | -6.55  | 11.94 | 0.57 | 1.00 | Yes |
| Bacteria | Actinobacteria | Actinobacteria | Actinomycetales | Micromonosporaceae  | Catenuloplanes       | 0.40%  | -    | -8.77  | -24.87 | 7.33  | 0.29 | 1.00 | -2.99  | -13.40 | 7.42  | 0.57 | 1.00 | Yes |
| Bacteria | Actinobacteria | Actinobacteria | Actinomycetales | Micromonosporaceae  | Other                | 0.90%  | -    | 13.16  | 2.53   | 23.79 | 0.02 | 0.99 | 4.06   | -2.82  | 10.95 | 0.25 | 1.00 | Yes |
| Bacteria | Actinobacteria | Actinobacteria | Actinomycetales | Micromonosporaceae  | Other                | 0.60%  | -    | -4.39  | -17.33 | 8.55  | 0.51 | 1.00 | -3.97  | -12.33 | 4.39  | 0.35 | 1.00 | Yes |
| Bacteria | Actinobacteria | Actinobacteria | Actinomycetales | Mycobacteriaceae    | Mycobacterium        | 7.48%  | -    | -0.02  | -3.88  | 3.85  | 0.99 | 1.00 | -0.53  | -3.02  | 1.97  | 0.68 | 1.00 | Yes |
| Bacteria | Actinobacteria | Actinobacteria | Actinomycetales | Nakamurellaceae     | Other                | 1.50%  | -    | -1.72  | -9.98  | 6.54  | 0.68 | 1.00 | -1.37  | -6.71  | 3.97  | 0.61 | 1.00 | Yes |
| Bacteria | Actinobacteria | Actinobacteria | Actinomycetales | Nocardiaceae        | Rhodococcus          | 0.25   | 0.40 | 2.41   | -0.29  | 5.11  | 0.08 | 1.00 | 1.26   | -0.48  | 3.01  | 0.16 | 1.00 | No  |
| Bacteria | Actinobacteria | Actinobacteria | Actinomycetales | Nocardiodiaceae     | Aeromicrobium        | 1.30%  | -    | -3.77  | -12.72 | 5.19  | 0.41 | 1.00 | -1.52  | -7.31  | 4.27  | 0.61 | 1.00 | Yes |
| Bacteria | Actinobacteria | Actinobacteria | Actinomycetales | Nocardiodiaceae     | Friedmanniella       | 0.30%  | -    | 4.42   | -13.98 | 22.81 | 0.64 | 1.00 | 0.14   | -11.75 | 12.03 | 0.98 | 1.00 | Yes |
| Bacteria | Actinobacteria | Actinobacteria | Actinomycetales | Nocardiodiaceae     | Kribbella            | 0.60%  | -    | -8.58  | -21.55 | 4.39  | 0.19 | 1.00 | -3.58  | -11.97 | 4.80  | 0.40 | 1.00 | Yes |
| Bacteria | Actinobacteria | Actinobacteria | Actinomycetales | Nocardiodiaceae     | Nocardioides         | 1.50%  | -    | 4.71   | -3.53  | 12.95 | 0.26 | 1.00 | -0.33  | -5.66  | 5.00  | 0.90 | 1.00 | Yes |
| Bacteria | Actinobacteria | Actinobacteria | Actinomycetales | Nocardiodiaceae     | Propionicimonas      | 7.78%  | -    | 0.60   | -3.18  | 4.38  | 0.75 | 1.00 | -0.22  | -2.66  | 2.22  | 0.86 | 1.00 | Yes |
| Bacteria | Actinobacteria | Actinobacteria | Actinomycetales | Nocardiodiaceae     | Other                | 7.38%  | -    | 2.12   | -1.72  | 5.95  | 0.28 | 1.00 | 1.84   | -0.63  | 4.32  | 0.14 | 1.00 | Yes |
| Bacteria | Actinobacteria | Actinobacteria | Actinomycetales | Nocardiodiaceae     | Other                | 1.00%  | -    | 1.17   | -8.91  | 11.24 | 0.82 | 1.00 | -1.17  | -7.68  | 5.34  | 0.72 | 1.00 | Yes |
| Bacteria | Actinobacteria | Actinobacteria | Actinomycetales | Nocardiodiaceae     | Prauseria            | 0.10%  | -    | 12.59  | -19.02 | 44.21 | 0.43 | 1.00 | 16.03  | -4.38  | 36.44 | 0.12 | 1.00 | Yes |
| Bacteria | Actinobacteria | Actinobacteria | Actinomycetales | Nocardiodiaceae     | Thermobifida         | 1.00%  | -    | 6.78   | -3.27  | 16.83 | 0.19 | 1.00 | 2.38   | -4.12  | 8.88  | 0.47 | 1.00 | Yes |
| Bacteria | Actinobacteria | Actinobacteria | Actinomycetales | Nocardiodiaceae     | Other                | 0.50%  | -    | -1.81  | -15.95 | 12.34 | 0.80 | 1.00 | -2.50  | -11.64 | 6.64  | 0.59 | 1.00 | Yes |

|          |                 |                  |                     |                       |                    |        |      |        |        |       |      |      |       |        |       |      |      |     |
|----------|-----------------|------------------|---------------------|-----------------------|--------------------|--------|------|--------|--------|-------|------|------|-------|--------|-------|------|------|-----|
| Bacteria | Actinobacteria  | Actinobacteria   | Actinomycetales     | Other                 | Other              | 7.08%  | -    | -0.07  | -4.08  | 3.95  | 0.97 | 1.00 | 0.29  | -2.30  | 2.89  | 0.82 | 1.00 | Yes |
| Bacteria | Actinobacteria  | Actinobacteria   | Actinomycetales     | Promicromonosporaceae | Cellulosimicrobium | 1.50%  | -    | 1.19   | -7.14  | 9.52  | 0.78 | 1.00 | -3.54 | -8.92  | 1.84  | 0.20 | 1.00 | Yes |
| Bacteria | Actinobacteria  | Actinobacteria   | Actinomycetales     | Promicromonosporaceae | Promicromonospora  | 0.40%  | -    | -9.57  | -25.40 | 6.26  | 0.24 | 1.00 | -4.81 | -15.04 | 5.43  | 0.36 | 1.00 | Yes |
| Bacteria | Actinobacteria  | Actinobacteria   | Actinomycetales     | Promicromonosporaceae | Xylanimicrobium    | 0.70%  | -    | -5.89  | -17.87 | 6.09  | 0.34 | 1.00 | -2.18 | -9.93  | 5.56  | 0.58 | 1.00 | Yes |
| Bacteria | Actinobacteria  | Actinobacteria   | Actinomycetales     | Propionibacteriaceae  | Luteococcus        | 0.20%  | -    | -14.52 | -37.01 | 7.96  | 0.21 | 1.00 | -2.52 | -17.07 | 12.02 | 0.73 | 1.00 | Yes |
| Bacteria | Actinobacteria  | Actinobacteria   | Actinomycetales     | Propionibacteriaceae  | Microlunatus       | 1.79%  | -    | -1.25  | -8.79  | 6.29  | 0.74 | 1.00 | -1.87 | -6.75  | 3.00  | 0.45 | 1.00 | Yes |
| Bacteria | Actinobacteria  | Actinobacteria   | Actinomycetales     | Propionibacteriaceae  | Other              | 0.20%  | -    | 11.59  | -10.78 | 33.96 | 0.31 | 1.00 | 2.72  | -11.74 | 17.19 | 0.71 | 1.00 | Yes |
| Bacteria | Actinobacteria  | Actinobacteria   | Actinomycetales     | Propionibacteriaceae  | Propionibacterium  | 6.68%  | -    | 2.38   | -1.65  | 6.40  | 0.25 | 1.00 | 2.20  | -0.41  | 4.80  | 0.10 | 1.00 | Yes |
| Bacteria | Actinobacteria  | Actinobacteria   | Actinomycetales     | Propionibacteriaceae  | Tessaracoccus      | 0.70%  | -    | 2.95   | -9.11  | 15.02 | 0.63 | 1.00 | 2.07  | -5.73  | 9.87  | 0.60 | 1.00 | Yes |
| Bacteria | Actinobacteria  | Actinobacteria   | Actinomycetales     | Propionibacteriaceae  | Other              | 0.10   | 0.17 | -2.08  | -8.13  | 3.97  | 0.50 | 1.00 | -1.14 | -5.05  | 2.77  | 0.57 | 1.00 | No  |
| Bacteria | Actinobacteria  | Actinobacteria   | Actinomycetales     | Pseudonocardiaceae    | Actinomycetospora  | 2.29%  | -    | 4.61   | -2.22  | 11.44 | 0.19 | 1.00 | 0.47  | -3.95  | 4.88  | 0.84 | 1.00 | Yes |
| Bacteria | Actinobacteria  | Actinobacteria   | Actinomycetales     | Pseudonocardiaceae    | Amycolatopsis      | 0.60%  | -    | -5.01  | -17.96 | 7.93  | 0.45 | 1.00 | -3.53 | -11.90 | 4.83  | 0.41 | 1.00 | Yes |
| Bacteria | Actinobacteria  | Actinobacteria   | Actinomycetales     | Pseudonocardiaceae    | Jiangella          | 0.20%  | -    | -13.60 | -36.05 | 8.86  | 0.23 | 1.00 | -6.73 | -21.25 | 7.78  | 0.36 | 1.00 | Yes |
| Bacteria | Actinobacteria  | Actinobacteria   | Actinomycetales     | Pseudonocardiaceae    | Pseudonocardia     | 2.69%  | -    | -4.92  | -11.15 | 1.31  | 0.12 | 1.00 | -1.91 | -5.94  | 2.12  | 0.35 | 1.00 | Yes |
| Bacteria | Actinobacteria  | Actinobacteria   | Actinomycetales     | Pseudonocardiaceae    | Saccharopolyspora  | 1.30%  | -    | -4.36  | -13.24 | 4.51  | 0.33 | 1.00 | -0.68 | -6.42  | 5.06  | 0.82 | 1.00 | Yes |
| Bacteria | Actinobacteria  | Actinobacteria   | Actinomycetales     | Pseudonocardiaceae    | Thermobispora      | 0.20%  | -    | 18.54  | -3.82  | 40.91 | 0.10 | 1.00 | 10.34 | -4.11  | 24.80 | 0.16 | 1.00 | Yes |
| Bacteria | Actinobacteria  | Actinobacteria   | Actinomycetales     | Pseudonocardiaceae    | Other              | 1.10%  | -    | 4.21   | -5.53  | 13.95 | 0.40 | 1.00 | 2.80  | -3.49  | 9.10  | 0.38 | 1.00 | Yes |
| Bacteria | Actinobacteria  | Actinobacteria   | Actinomycetales     | Ruaniaceae            | Other              | 0.20%  | -    | 8.61   | -13.96 | 31.18 | 0.45 | 1.00 | 7.11  | -7.48  | 21.69 | 0.34 | 1.00 | Yes |
| Bacteria | Actinobacteria  | Actinobacteria   | Actinomycetales     | Sporichthyaceae       | Other              | 0.20%  | -    | -13.60 | -36.05 | 8.86  | 0.23 | 1.00 | -6.73 | -21.25 | 7.78  | 0.36 | 1.00 | Yes |
| Bacteria | Actinobacteria  | Actinobacteria   | Actinomycetales     | Streptomycetaceae     | Streptomyces       | 3.09%  | -    | -0.51  | -6.34  | 5.31  | 0.86 | 1.00 | -0.86 | -4.63  | 2.90  | 0.65 | 1.00 | Yes |
| Bacteria | Actinobacteria  | Actinobacteria   | Actinomycetales     | Streptosporangiaceae  | Nonomuraea         | 0.20%  | -    | -13.54 | -36.01 | 8.93  | 0.24 | 1.00 | -9.97 | -24.49 | 4.55  | 0.18 | 1.00 | Yes |
| Bacteria | Actinobacteria  | Actinobacteria   | Actinomycetales     | Streptosporangiaceae  | Other              | 0.60%  | -    | 16.98  | 3.95   | 30.01 | 0.01 | 0.99 | 9.29  | 0.86   | 17.71 | 0.03 | 1.00 | Yes |
| Bacteria | Actinobacteria  | Actinobacteria   | Actinomycetales     | Streptosporangiaceae  | Other              | 0.10%  | -    | 31.11  | -0.47  | 62.69 | 0.05 | 0.99 | 16.99 | -3.43  | 37.41 | 0.10 | 1.00 | Yes |
| Bacteria | Actinobacteria  | Actinobacteria   | Actinomycetales     | Thermomonosporaceae   | Actinomadura       | 0.50%  | -    | 10.84  | -3.42  | 25.10 | 0.14 | 1.00 | 0.73  | -8.49  | 9.96  | 0.88 | 1.00 | Yes |
| Bacteria | Actinobacteria  | Actinobacteria   | Actinomycetales     | Williamsiaceae        | Williamsia         | 0.20%  | -    | -3.02  | -25.42 | 19.39 | 0.79 | 1.00 | -9.19 | -23.66 | 5.28  | 0.21 | 1.00 | Yes |
| Bacteria | Actinobacteria  | Actinobacteria   | Actinomycetales     | Yaniellaceae          | Yaniella           | 3.49%  | -    | -5.66  | -11.10 | -0.21 | 0.04 | 0.99 | -1.25 | -4.77  | 2.28  | 0.49 | 1.00 | Yes |
| Bacteria | Actinobacteria  | Actinobacteria   | Actinomycetales     | Other                 | Other              | 9.07%  | -    | 1.08   | -2.42  | 4.58  | 0.54 | 1.00 | -0.41 | -2.67  | 1.85  | 0.72 | 1.00 | Yes |
| Bacteria | Actinobacteria  | Actinobacteria   | Bifidobacteriales   | Bifidobacteriaceae    | Bifidobacterium    | 2.71   | 0.63 | 0.69   | -1.10  | 2.48  | 0.45 | 1.00 | -0.21 | -1.36  | 0.95  | 0.73 | 1.00 | No  |
| Bacteria | Actinobacteria  | Actinobacteria   | Bifidobacteriales   | Bifidobacteriaceae    | Other              | 12.76% | -    | -1.13  | -4.15  | 1.90  | 0.47 | 1.00 | -0.41 | -2.36  | 1.55  | 0.68 | 1.00 | Yes |
| Bacteria | Actinobacteria  | Actinobacteria   | Bifidobacteriales   | Bifidobacteriaceae    | Scardovia          | 0.11   | 0.19 | 2.18   | -3.04  | 7.39  | 0.41 | 1.00 | 0.33  | -3.04  | 3.70  | 0.85 | 1.00 | No  |
| Bacteria | Actinobacteria  | Actinobacteria   | Bifidobacteriales   | Bifidobacteriaceae    | Other              | 7.78%  | -    | -0.75  | -4.51  | 3.00  | 0.69 | 1.00 | 0.54  | -1.89  | 2.97  | 0.66 | 1.00 | Yes |
| Bacteria | Actinobacteria  | Coriobacteriia   | Coriobacteriales    | Coriobacteriaceae     | Adlercreutzia†     | 1.50   | 0.56 | -2.52  | -4.45  | -0.58 | 0.01 | 0.99 | -1.38 | -2.63  | -0.13 | 0.03 | 1.00 | No  |
| Bacteria | Actinobacteria  | Coriobacteriia   | Coriobacteriales    | Coriobacteriaceae     | Atopobium          | 0.26   | 0.27 | 2.38   | -1.29  | 6.06  | 0.20 | 1.00 | 0.96  | -1.42  | 3.33  | 0.43 | 1.00 | No  |
| Bacteria | Actinobacteria  | Coriobacteriia   | Coriobacteriales    | Coriobacteriaceae     | Collinsella        | 0.61   | 0.46 | 0.21   | -2.02  | 2.44  | 0.85 | 1.00 | 0.41  | -1.03  | 1.85  | 0.57 | 1.00 | No  |
| Bacteria | Actinobacteria  | Coriobacteriia   | Coriobacteriales    | Coriobacteriaceae     | Eggerthella†       | 1.52   | 0.54 | 0.11   | -2.13  | 2.36  | 0.92 | 1.00 | -0.70 | -2.15  | 0.75  | 0.34 | 1.00 | No  |
| Bacteria | Actinobacteria  | Coriobacteriia   | Coriobacteriales    | Coriobacteriaceae     | Other              | 0.20%  | -    | 17.49  | -4.94  | 39.92 | 0.13 | 1.00 | 15.25 | 0.77   | 29.73 | 0.04 | 1.00 | Yes |
| Bacteria | Actinobacteria  | Coriobacteriia   | Coriobacteriales    | Coriobacteriaceae     | Slackia            | 0.65   | 0.50 | 0.67   | -1.35  | 2.69  | 0.52 | 1.00 | 0.83  | -0.48  | 2.13  | 0.21 | 1.00 | No  |
| Bacteria | Actinobacteria  | Coriobacteriia   | Coriobacteriales    | Coriobacteriaceae     | Other              | 1.76   | 0.41 | -2.05  | -4.52  | 0.43  | 0.11 | 1.00 | -1.04 | -2.64  | 0.56  | 0.20 | 1.00 | No  |
| Bacteria | Actinobacteria  | MB-A2-108        | 0319-7L14           | Other                 | Other              | 0.90%  | -    | -4.49  | -15.10 | 6.11  | 0.41 | 1.00 | -8.48 | -15.31 | -1.64 | 0.02 | 1.00 | Yes |
| Bacteria | Actinobacteria  | MB-A2-108        | Other               | Other                 | Other              | 0.20%  | -    | -13.60 | -36.05 | 8.86  | 0.23 | 1.00 | -6.73 | -21.25 | 7.78  | 0.36 | 1.00 | Yes |
| Bacteria | Actinobacteria  | Nitriliruptoria  | Euzebyales          | Euzebyaceae           | Euzebya            | 0.60%  | -    | 8.77   | -4.18  | 21.73 | 0.18 | 1.00 | 3.36  | -5.02  | 11.73 | 0.43 | 1.00 | Yes |
| Bacteria | Actinobacteria  | Nitriliruptoria  | Nitriliruptorales   | Nitriliruptoraceae    | Nitriliruptor      | 2.59%  | -    | -0.30  | -6.62  | 6.02  | 0.92 | 1.00 | 1.75  | -2.34  | 5.83  | 0.40 | 1.00 | Yes |
| Bacteria | Actinobacteria  | OPB41            | Other               | Other                 | Other              | 0.90%  | -    | -4.17  | -14.86 | 6.52  | 0.44 | 1.00 | -4.54 | -11.44 | 2.36  | 0.20 | 1.00 | Yes |
| Bacteria | Actinobacteria  | Rubrobacteria    | Rubrobacterales     | Rubrobacteraceae      | Rubrobacter        | 20.74% | -    | 1.22   | -1.30  | 3.74  | 0.34 | 1.00 | 0.55  | -1.08  | 2.18  | 0.51 | 1.00 | Yes |
| Bacteria | Actinobacteria  | Rubrobacteria    | Rubrobacterales     | Rubrobacteraceae      | Other              | 0.10%  | -    | -14.09 | -45.74 | 17.56 | 0.38 | 1.00 | -7.82 | -28.28 | 12.64 | 0.45 | 1.00 | Yes |
| Bacteria | Actinobacteria  | Thermoleophilia  | Gaiellales          | Gaiellales            | AK1AB1_02E         | 0.40%  | -    | 2.33   | -13.51 | 18.17 | 0.77 | 1.00 | 4.54  | -5.69  | 14.78 | 0.38 | 1.00 | Yes |
| Bacteria | Actinobacteria  | Thermoleophilia  | Gaiellales          | Gaiellaceae           | Other              | 2.49%  | -    | 0.21   | -6.23  | 6.65  | 0.95 | 1.00 | -2.31 | -6.47  | 1.85  | 0.28 | 1.00 | Yes |
| Bacteria | Actinobacteria  | Thermoleophilia  | Gaiellales          | Gaiellales            | Other              | 0.40%  | -    | 2.83   | -13.05 | 18.71 | 0.73 | 1.00 | -0.66 | -10.92 | 9.61  | 0.90 | 1.00 | Yes |
| Bacteria | Actinobacteria  | Thermoleophilia  | Solirubrobacterales | Conexibacteraceae     | Other              | 1.30%  | -    | 0.12   | -8.83  | 9.06  | 0.98 | 1.00 | -4.38 | -10.15 | 1.40  | 0.14 | 1.00 | Yes |
| Bacteria | Actinobacteria  | Thermoleophilia  | Solirubrobacterales | Other                 | Other              | 0.10%  | -    | -12.98 | -44.72 | 18.76 | 0.42 | 1.00 | -5.58 | -26.09 | 14.94 | 0.59 | 1.00 | Yes |
| Bacteria | Actinobacteria  | Thermoleophilia  | Solirubrobacterales | Patulibacteraceae     | Patulibacter       | 0.20%  | -    | 7.62   | -14.94 | 30.17 | 0.51 | 1.00 | 0.75  | -13.83 | 15.33 | 0.92 | 1.00 | Yes |
| Bacteria | Actinobacteria  | Thermoleophilia  | Solirubrobacterales | Patulibacteraceae     | Other              | 1.50%  | -    | 6.39   | -1.84  | 14.61 | 0.13 | 1.00 | -0.20 | -5.52  | 5.12  | 0.94 | 1.00 | Yes |
| Bacteria | Actinobacteria  | Thermoleophilia  | Solirubrobacterales | Solirubrobacteraceae  | Other              | 2.89%  | -    | 1.17   | -4.86  | 7.20  | 0.70 | 1.00 | 0.35  | -3.55  | 4.24  | 0.86 | 1.00 | Yes |
| Bacteria | Actinobacteria  | Thermoleophilia  | Solirubrobacterales | Solirubrobacteraceae  | Other              | 5.18%  | -    | -0.92  | -5.46  | 3.61  | 0.69 | 1.00 | -1.38 | -4.31  | 1.55  | 0.35 | 1.00 | Yes |
| Bacteria | AD3             | ABS-6            | Other               | Other                 | Other              | 0.30%  | -    | 1.47   | -16.85 | 19.78 | 0.88 | 1.00 | 4.61  | -7.22  | 16.45 | 0.44 | 1.00 | Yes |
| Bacteria | Armatimonadetes | [Fimbrimonadia]  | [Fimbrimonadales]   | [Fimbrimonadaceae]    | Fimbrimonas        | 1.89%  | -    | 1.06   | -6.28  | 8.39  | 0.78 | 1.00 | -0.33 | -5.07  | 4.41  | 0.89 | 1.00 | Yes |
| Bacteria | Armatimonadetes | [Fimbrimonadia]  | [Fimbrimonadales]   | [Fimbrimonadaceae]    | Other              | 1.30%  | -    | -3.12  | -12.08 | 5.83  | 0.49 | 1.00 | 0.50  | -5.28  | 6.29  | 0.86 | 1.00 | Yes |
| Bacteria | Armatimonadetes | [Fimbrimonadia]  | [Fimbrimonadales]   | [Fimbrimonadaceae]    | Other              | 0.50%  | -    | 11.46  | -2.73  | 25.65 | 0.11 | 1.00 | 0.27  | -8.91  | 9.45  | 0.95 | 1.00 | Yes |
| Bacteria | Armatimonadetes | 0319-6E2         | Other               | Other                 | Other              | 0.90%  | -    | -9.09  | -19.79 | 1.62  | 0.10 | 1.00 | -5.69 | -12.61 | 1.22  | 0.11 | 1.00 | Yes |
| Bacteria | Armatimonadetes | Armatimonadia    | Armatimonadales     | Armatimonadaceae      | Armatimonas        | 0.10%  | -    | -7.59  | -39.24 | 24.06 | 0.64 | 1.00 | 0.78  | -19.67 | 21.24 | 0.94 | 1.00 | Yes |
| Bacteria | Armatimonadetes | Armatimonadia    | Armatimonadales     | Armatimonadaceae      | Other              | 0.60%  | -    | -3.37  | -16.44 | 9.71  | 0.61 | 1.00 | 0.28  | -8.18  | 8.73  | 0.95 | 1.00 | Yes |
| Bacteria | Armatimonadetes | Chthonomonadetes | Chthonomonadales    | Chthonomonadaceae     | Other              | 0.10%  | -    | 13.40  | -18.19 | 45.00 | 0.41 | 1.00 | 17.50 | -2.89  | 37.90 | 0.09 | 1.00 | Yes |
| Bacteria | Armatimonadetes | SJA-176          | RB046               | Other                 | Other              | 0.30%  | -    | 18.70  | 0.39   | 37.01 | 0.05 | 0.99 | 10.54 | -1.29  | 22.38 | 0.08 | 1.00 | Yes |
| Bacteria | Bacteroidetes   | [Rhodothermi]    | [Rhodothermales]    | [Balneolaceae]        | Balneola           | 1.60%  | -    | 2.80   | -5.29  | 10.89 | 0.50 | 1.00 | 2.23  | -2.99  | 7.46  | 0.40 | 1.00 | Yes |
| Bacteria | Bacteroidetes   | [Rhodothermi]    | [Rhodothermales]    | [Balneolaceae]        | KSA1               | 1.30%  | -    | -1.50  | -10.40 | 7.41  | 0.74 | 1.00 | -1.62 | -7.37  | 4.13  | 0.58 | 1.00 | Yes |
| Bacteria | Bacteroidetes   | [Rhodothermi]    | [Rhodothermales]    | Rhodothermaceae       | Other              | 0.20%  | -    | -13.60 | -36.05 | 8.86  | 0.23 | 1.00 | -6.73 | -21.25 | 7.78  | 0.36 | 1.00 | Yes |
| Bacteria | Bacteroidetes   | [Saprospirae]    | [Saprospirales]     | Chitinophagaceae      | Chitinophaga       | 0.40%  | -    | -0.61  | -16.51 | 15.29 | 0.94 | 1.00 | 6.27  | -4.00  | 16.53 | 0.23 | 1.00 | Yes |
| Bacteria | Bacteroidetes   | [Saprospirae]    | [Saprospirales]     | Chitinophagaceae      | Flaviumibacter     | 0.40%  | -    | 8.89   | -7.03  | 24.80 | 0.27 | 1.00 | -3.24 | -13.53 | 7.05  | 0.54 | 1.00 | Yes |

|          |               |                |                  |                      |                   |        |      |        |        |       |      |      |       |        |       |      |      |     |
|----------|---------------|----------------|------------------|----------------------|-------------------|--------|------|--------|--------|-------|------|------|-------|--------|-------|------|------|-----|
| Bacteria | Bacteroidetes | [Saprosirae]   | [Saprosirales]   | Chitinophagaceae     | Flavisolibacter   | 0.50%  | -    | 1.00   | -13.33 | 15.32 | 0.89 | 1.00 | 0.94  | -8.32  | 10.19 | 0.84 | 1.00 | Yes |
| Bacteria | Bacteroidetes | [Saprosirae]   | [Saprosirales]   | Chitinophagaceae     | Niabella          | 0.50%  | -    | 7.10   | -7.16  | 21.37 | 0.33 | 1.00 | 4.67  | -4.55  | 13.89 | 0.32 | 1.00 | Yes |
| Bacteria | Bacteroidetes | [Saprosirae]   | [Saprosirales]   | Chitinophagaceae     | Niastella         | 0.10%  | -    | -12.98 | -44.72 | 18.76 | 0.42 | 1.00 | -5.58 | -26.09 | 14.94 | 0.59 | 1.00 | Yes |
| Bacteria | Bacteroidetes | [Saprosirae]   | [Saprosirales]   | Chitinophagaceae     | Other             | 0.20%  | -    | 25.96  | 3.63   | 48.29 | 0.02 | 0.99 | -6.87 | -21.33 | 7.59  | 0.35 | 1.00 | Yes |
| Bacteria | Bacteroidetes | [Saprosirae]   | [Saprosirales]   | Chitinophagaceae     | Sediminibacterium | 0.30%  | -    | 1.54   | -16.79 | 19.87 | 0.87 | 1.00 | 3.49  | -8.35  | 15.34 | 0.56 | 1.00 | Yes |
| Bacteria | Bacteroidetes | [Saprosirae]   | [Saprosirales]   | Chitinophagaceae     | Segetibacter      | 0.40%  | -    | 0.21   | -15.88 | 16.30 | 0.98 | 1.00 | -1.62 | -12.02 | 8.78  | 0.76 | 1.00 | Yes |
| Bacteria | Bacteroidetes | [Saprosirae]   | [Saprosirales]   | Chitinophagaceae     |                   | 5.18%  | -    | 0.50   | -4.04  | 5.04  | 0.83 | 1.00 | 0.60  | -2.34  | 3.53  | 0.69 | 1.00 | Yes |
| Bacteria | Bacteroidetes | [Saprosirae]   | [Saprosirales]   | Saprosiraceae        |                   | 4.69%  | -    | -0.40  | -5.16  | 4.35  | 0.87 | 1.00 | -0.55 | -3.62  | 2.52  | 0.73 | 1.00 | Yes |
| Bacteria | Bacteroidetes | [Saprosirae]   | [Saprosirales]   |                      |                   | 0.60%  | -    | -8.60  | -21.62 | 4.42  | 0.20 | 1.00 | -3.22 | -11.63 | 5.20  | 0.45 | 1.00 | Yes |
| Bacteria | Bacteroidetes | Bacteroidia    | Bacteroidales    | [Barnesiellaceae]    | Other             | 0.40%  | -    | 9.67   | -6.21  | 25.55 | 0.23 | 1.00 | 9.10  | -1.15  | 19.36 | 0.08 | 1.00 | Yes |
| Bacteria | Bacteroidetes | Bacteroidia    | Bacteroidales    | [Barnesiellaceae]    |                   | 0.36   | 0.41 | 0.15   | -2.33  | 2.63  | 0.91 | 1.00 | 0.53  | -1.07  | 2.13  | 0.52 | 1.00 | No  |
| Bacteria | Bacteroidetes | Bacteroidia    | Bacteroidales    | [Odoribacteraceae]   | Butyricimonas     | 0.14   | 0.28 | -0.90  | -4.46  | 2.67  | 0.62 | 1.00 | -1.33 | -3.64  | 0.97  | 0.26 | 1.00 | No  |
| Bacteria | Bacteroidetes | Bacteroidia    | Bacteroidales    | [Odoribacteraceae]   | Odoribacter       | 0.16   | 0.29 | 0.12   | -3.41  | 3.65  | 0.95 | 1.00 | -0.75 | -3.03  | 1.53  | 0.52 | 1.00 | No  |
| Bacteria | Bacteroidetes | Bacteroidia    | Bacteroidales    | [Paraprevotellaceae] | [Prevotella]      | 0.38   | 0.48 | 1.71   | -0.44  | 3.85  | 0.12 | 1.00 | 1.46  | 0.08   | 2.84  | 0.04 | 1.00 | No  |
| Bacteria | Bacteroidetes | Bacteroidia    | Bacteroidales    | [Paraprevotellaceae] | CF231             | 13.26% | -    | -0.63  | -3.69  | 2.43  | 0.69 | 1.00 | -0.52 | -2.50  | 1.46  | 0.61 | 1.00 | Yes |
| Bacteria | Bacteroidetes | Bacteroidia    | Bacteroidales    | [Paraprevotellaceae] | Other             | 0.20%  | -    | -9.45  | -31.91 | 13.01 | 0.41 | 1.00 | -0.31 | -14.83 | 14.21 | 0.97 | 1.00 | Yes |
| Bacteria | Bacteroidetes | Bacteroidia    | Bacteroidales    | [Paraprevotellaceae] | Paraprevotella    | 0.18   | 0.34 | 1.06   | -1.94  | 4.06  | 0.49 | 1.00 | 0.69  | -1.25  | 2.62  | 0.49 | 1.00 | No  |
| Bacteria | Bacteroidetes | Bacteroidia    | Bacteroidales    | [Paraprevotellaceae] | YRC22             | 3.09%  | -    | 1.22   | -4.58  | 7.03  | 0.68 | 1.00 | -1.60 | -5.35  | 2.15  | 0.40 | 1.00 | Yes |
| Bacteria | Bacteroidetes | Bacteroidia    | Bacteroidales    | [Paraprevotellaceae] |                   | 14.46% | -    | 0.33   | -2.56  | 3.22  | 0.82 | 1.00 | -0.04 | -1.90  | 1.83  | 0.97 | 1.00 | Yes |
| Bacteria | Bacteroidetes | Bacteroidia    | Bacteroidales    | BA008                |                   | 0.40%  | -    | 12.82  | -2.95  | 28.59 | 0.11 | 1.00 | 12.49 | 2.32   | 22.67 | 0.02 | 1.00 | Yes |
| Bacteria | Bacteroidetes | Bacteroidia    | Bacteroidales    | Bacteroidaceae       | 5-7N15            | 2.39%  | -    | -4.06  | -10.63 | 2.50  | 0.22 | 1.00 | -2.40 | -6.64  | 1.84  | 0.27 | 1.00 | Yes |
| Bacteria | Bacteroidetes | Bacteroidia    | Bacteroidales    | Bacteroidaceae       | Bacteroides       | 2.12   | 0.61 | 0.89   | -0.80  | 2.59  | 0.30 | 1.00 | -0.17 | -1.27  | 0.93  | 0.76 | 1.00 | No  |
| Bacteria | Bacteroidetes | Bacteroidia    | Bacteroidales    | Bacteroidaceae       | BF311             | 0.60%  | -    | -10.44 | -23.42 | 2.55  | 0.12 | 1.00 | -3.76 | -12.16 | 4.64  | 0.38 | 1.00 | Yes |
| Bacteria | Bacteroidetes | Bacteroidia    | Bacteroidales    | Bacteroidaceae       | Other             | 0.10%  | -    | 31.03  | -0.53  | 62.58 | 0.05 | 0.99 | 37.22 | 16.92  | 57.52 | 0.00 | 1.00 | Yes |
| Bacteria | Bacteroidetes | Bacteroidia    | Bacteroidales    | Bacteroidaceae       |                   | 1.79%  | -    | -0.16  | -7.73  | 7.41  | 0.97 | 1.00 | -0.74 | -5.63  | 4.15  | 0.77 | 1.00 | Yes |
| Bacteria | Bacteroidetes | Bacteroidia    | Bacteroidales    | BS11                 |                   | 1.79%  | -    | -4.48  | -12.18 | 3.21  | 0.25 | 1.00 | -0.81 | -5.79  | 4.16  | 0.75 | 1.00 | Yes |
| Bacteria | Bacteroidetes | Bacteroidia    | Bacteroidales    | Marinilabiaceae      |                   | 1.30%  | -    | -1.55  | -10.50 | 7.40  | 0.73 | 1.00 | -3.29 | -9.07  | 2.49  | 0.26 | 1.00 | Yes |
| Bacteria | Bacteroidetes | Bacteroidia    | Bacteroidales    | Other                | Other             | 0.70%  | -    | -1.33  | -13.36 | 10.70 | 0.83 | 1.00 | 1.51  | -6.26  | 9.29  | 0.70 | 1.00 | Yes |
| Bacteria | Bacteroidetes | Bacteroidia    | Bacteroidales    | p-2534-18B5          |                   | 0.20%  | -    | 13.66  | -8.69  | 36.00 | 0.23 | 1.00 | -3.89 | -18.33 | 10.56 | 0.60 | 1.00 | Yes |
| Bacteria | Bacteroidetes | Bacteroidia    | Bacteroidales    | Porphyromonadaceae   | Dysgonomonas      | 1.30%  | -    | 2.82   | -6.04  | 11.68 | 0.53 | 1.00 | 1.76  | -3.97  | 7.48  | 0.55 | 1.00 | Yes |
| Bacteria | Bacteroidetes | Bacteroidia    | Bacteroidales    | Porphyromonadaceae   | Paludibacter      | 1.30%  | -    | 1.23   | -7.62  | 10.08 | 0.79 | 1.00 | -2.47 | -8.18  | 3.25  | 0.40 | 1.00 | Yes |
| Bacteria | Bacteroidetes | Bacteroidia    | Bacteroidales    | Porphyromonadaceae   | Parabacteroides   | 0.82   | 0.58 | 0.21   | -1.59  | 2.00  | 0.82 | 1.00 | -0.20 | -1.36  | 0.96  | 0.74 | 1.00 | No  |
| Bacteria | Bacteroidetes | Bacteroidia    | Bacteroidales    | Porphyromonadaceae   | Porphyromonas     | 21.83% | -    | -0.50  | -2.96  | 1.96  | 0.69 | 1.00 | -0.23 | -1.82  | 1.36  | 0.77 | 1.00 | Yes |
| Bacteria | Bacteroidetes | Bacteroidia    | Bacteroidales    | Porphyromonadaceae   | Tannerella        | 0.70%  | -    | -0.83  | -12.90 | 11.25 | 0.89 | 1.00 | -0.55 | -8.35  | 7.25  | 0.89 | 1.00 | Yes |
| Bacteria | Bacteroidetes | Bacteroidia    | Bacteroidales    | Porphyromonadaceae   |                   | 2.69%  | -    | 2.04   | -4.21  | 8.30  | 0.52 | 1.00 | -0.41 | -4.45  | 3.63  | 0.84 | 1.00 | Yes |
| Bacteria | Bacteroidetes | Bacteroidia    | Bacteroidales    | Prevotellaceae       | Prevotella        | 1.45   | 0.79 | 1.20   | -0.12  | 2.51  | 0.08 | 0.99 | 0.55  | -0.31  | 1.40  | 0.21 | 1.00 | No  |
| Bacteria | Bacteroidetes | Bacteroidia    | Bacteroidales    | Prevotellaceae       |                   | 0.10%  | -    | 22.54  | -9.01  | 54.09 | 0.16 | 1.00 | -7.94 | -28.35 | 12.46 | 0.45 | 1.00 | Yes |
| Bacteria | Bacteroidetes | Bacteroidia    | Bacteroidales    | RF16                 |                   | 2.79%  | -    | 0.09   | -6.07  | 6.25  | 0.98 | 1.00 | -1.73 | -5.71  | 2.25  | 0.39 | 1.00 | Yes |
| Bacteria | Bacteroidetes | Bacteroidia    | Bacteroidales    | Rikenellaceae        | AF12              | 3.89%  | -    | -1.19  | -6.39  | 4.00  | 0.65 | 1.00 | -0.66 | -4.01  | 2.70  | 0.70 | 1.00 | Yes |
| Bacteria | Bacteroidetes | Bacteroidia    | Bacteroidales    | Rikenellaceae        | Blvii28           | 0.20%  | -    | 3.24   | -19.19 | 25.67 | 0.78 | 1.00 | -3.72 | -18.22 | 10.77 | 0.61 | 1.00 | Yes |
| Bacteria | Bacteroidetes | Bacteroidia    | Bacteroidales    | Rikenellaceae        | Rikenella         | 1.00%  | -    | 1.38   | -8.78  | 11.53 | 0.79 | 1.00 | -0.21 | -6.78  | 6.35  | 0.95 | 1.00 | Yes |
| Bacteria | Bacteroidetes | Bacteroidia    | Bacteroidales    | Rikenellaceae        |                   | 0.46   | 0.45 | 0.48   | -1.76  | 2.73  | 0.67 | 1.00 | 0.39  | -1.06  | 1.84  | 0.59 | 1.00 | No  |
| Bacteria | Bacteroidetes | Bacteroidia    | Bacteroidales    | S24-7                |                   | 0.59   | 0.74 | 0.20   | -1.19  | 1.59  | 0.77 | 1.00 | -0.20 | -1.10  | 0.70  | 0.66 | 1.00 | No  |
| Bacteria | Bacteroidetes | Bacteroidia    | Bacteroidales    | SB-1                 |                   | 0.10%  | -    | 7.56   | -24.13 | 39.24 | 0.64 | 1.00 | 4.92  | -15.55 | 25.40 | 0.64 | 1.00 | Yes |
| Bacteria | Bacteroidetes | Bacteroidia    | Bacteroidales    |                      |                   | 0.16   | 0.34 | 1.46   | -1.50  | 4.43  | 0.33 | 1.00 | -0.44 | -2.36  | 1.48  | 0.65 | 1.00 | No  |
| Bacteria | Bacteroidetes | Cytophagia     | Cytophagales     | Cyclobacteriaceae    |                   | 2.19%  | -    | 0.23   | -6.65  | 7.10  | 0.95 | 1.00 | -1.23 | -5.67  | 3.22  | 0.59 | 1.00 | Yes |
| Bacteria | Bacteroidetes | Cytophagia     | Cytophagales     | Cytophagaceae        | Adhaeribacter     | 0.80%  | -    | -6.33  | -17.63 | 4.96  | 0.27 | 1.00 | -2.95 | -10.25 | 4.35  | 0.43 | 1.00 | Yes |
| Bacteria | Bacteroidetes | Cytophagia     | Cytophagales     | Cytophagaceae        | Dyadobacter       | 0.10%  | -    | 3.42   | -28.70 | 35.54 | 0.83 | 1.00 | 0.56  | -20.20 | 21.31 | 0.96 | 1.00 | Yes |
| Bacteria | Bacteroidetes | Cytophagia     | Cytophagales     | Cytophagaceae        | Hymenobacter      | 0.60%  | -    | -4.02  | -17.01 | 8.96  | 0.54 | 1.00 | -3.88 | -12.27 | 4.51  | 0.36 | 1.00 | Yes |
| Bacteria | Bacteroidetes | Cytophagia     | Cytophagales     | Cytophagaceae        | Larkinella        | 0.40%  | -    | 1.24   | -14.85 | 17.34 | 0.88 | 1.00 | 3.21  | -7.19  | 13.61 | 0.54 | 1.00 | Yes |
| Bacteria | Bacteroidetes | Cytophagia     | Cytophagales     | Cytophagaceae        | Leadbetterella    | 1.20%  | -    | -1.48  | -10.81 | 7.85  | 0.76 | 1.00 | -1.38 | -7.41  | 4.65  | 0.65 | 1.00 | Yes |
| Bacteria | Bacteroidetes | Cytophagia     | Cytophagales     | Cytophagaceae        | Pontibacter       | 0.30%  | -    | -12.53 | -30.95 | 5.88  | 0.18 | 1.00 | -6.02 | -17.92 | 5.89  | 0.32 | 1.00 | Yes |
| Bacteria | Bacteroidetes | Cytophagia     | Cytophagales     | Cytophagaceae        | Rhodocytophaga    | 0.20%  | -    | -21.38 | -43.75 | 0.99  | 0.06 | 0.99 | -9.50 | -23.97 | 4.97  | 0.20 | 1.00 | Yes |
| Bacteria | Bacteroidetes | Cytophagia     | Cytophagales     | Cytophagaceae        | Runella           | 0.10%  | -    | 0.50   | -31.14 | 32.14 | 0.98 | 1.00 | 1.55  | -18.90 | 22.00 | 0.88 | 1.00 | Yes |
| Bacteria | Bacteroidetes | Cytophagia     | Cytophagales     | Cytophagaceae        |                   | 3.59%  | -    | -0.64  | -6.08  | 4.80  | 0.82 | 1.00 | -2.04 | -5.56  | 1.47  | 0.25 | 1.00 | Yes |
| Bacteria | Bacteroidetes | Cytophagia     | Cytophagales     | Flammeovirgaceae     | Roseivirga        | 0.60%  | -    | -3.48  | -16.45 | 9.50  | 0.60 | 1.00 | -1.53 | -9.92  | 6.86  | 0.72 | 1.00 | Yes |
| Bacteria | Bacteroidetes | Cytophagia     | Cytophagales     | Flammeovirgaceae     |                   | 1.99%  | -    | -5.65  | -12.92 | 1.63  | 0.13 | 1.00 | -2.55 | -7.25  | 2.16  | 0.29 | 1.00 | Yes |
| Bacteria | Bacteroidetes | Flavobacteriia | Flavobacteriales | [Weeksellaceae]      | Chryseobacterium  | 4.09%  | -    | 2.71   | -2.34  | 7.76  | 0.29 | 1.00 | 2.61  | -0.66  | 5.87  | 0.12 | 1.00 | Yes |
| Bacteria | Bacteroidetes | Flavobacteriia | Flavobacteriales | [Weeksellaceae]      | Cloacibacterium   | 2.79%  | -    | 1.93   | -4.15  | 8.00  | 0.53 | 1.00 | 2.14  | -1.79  | 6.06  | 0.28 | 1.00 | Yes |
| Bacteria | Bacteroidetes | Flavobacteriia | Flavobacteriales | [Weeksellaceae]      | Elizabethkingia   | 1.10%  | -    | 2.57   | -7.02  | 12.15 | 0.60 | 1.00 | 4.12  | -2.07  | 10.31 | 0.19 | 1.00 | Yes |
| Bacteria | Bacteroidetes | Flavobacteriia | Flavobacteriales | [Weeksellaceae]      | Other             | 0.10%  | -    | 13.40  | -18.19 | 45.00 | 0.41 | 1.00 | 17.50 | -2.89  | 37.90 | 0.09 | 1.00 | Yes |
| Bacteria | Bacteroidetes | Flavobacteriia | Flavobacteriales | [Weeksellaceae]      | Wautersiella      | 0.10%  | -    | -18.81 | -50.48 | 12.86 | 0.24 | 1.00 | -3.25 | -23.73 | 17.23 | 0.76 | 1.00 | Yes |
| Bacteria | Bacteroidetes | Flavobacteriia | Flavobacteriales | [Weeksellaceae]      |                   | 2.69%  | -    | -3.61  | -9.83  | 2.60  | 0.25 | 1.00 | 0.18  | -3.84  | 4.20  | 0.93 | 1.00 | Yes |
| Bacteria | Bacteroidetes | Flavobacteriia | Flavobacteriales | Cryomorphaceae       | Brumimicrobium    | 0.30%  | -    | -8.52  | -26.93 | 9.89  | 0.36 | 1.00 | -5.83 | -17.73 | 6.07  | 0.34 | 1.00 | Yes |
| Bacteria | Bacteroidetes | Flavobacteriia | Flavobacteriales | Cryomorphaceae       | Crocinitomix      | 1.00%  | -    | -4.48  | -14.64 | 5.67  | 0.39 | 1.00 | -3.51 | -10.07 | 3.05  | 0.29 | 1.00 | Yes |
| Bacteria | Bacteroidetes | Flavobacteriia | Flavobacteriales | Cryomorphaceae       | Fluviicola        | 0.40%  | -    | -3.63  | -19.61 | 12.34 | 0.66 | 1.00 | -3.84 | -14.16 | 6.48  | 0.47 | 1.00 | Yes |
| Bacteria | Bacteroidetes | Flavobacteriia | Flavobacteriales | Cryomorphaceae       |                   | 1.99%  | -    | 0.58   | -6.61  | 7.76  | 0.87 | 1.00 | -0.85 | -5.50  | 3.79  | 0.72 | 1.00 | Yes |
| Bacteria | Bacteroidetes | Flavobacteriia | Flavobacteriales | Flavobacteriaceae    | Aequorivita       | 1.99%  | -    | -1.82  | -9.11  | 5.47  | 0.62 | 1.00 | -1.55 | -6.26  | 3.16  | 0.52 | 1.00 | Yes |

|          |               |                       |                        |                         |                            |       |      |        |        |       |      |      |       |        |       |      |      |     |
|----------|---------------|-----------------------|------------------------|-------------------------|----------------------------|-------|------|--------|--------|-------|------|------|-------|--------|-------|------|------|-----|
| Bacteria | Bacteroidetes | Flavobacteriia        | Flavobacteriales       | Flavobacteriaceae       | Capnocytophaga             | 1.20% | -    | 2.40   | -6.81  | 11.60 | 0.61 | 1.00 | 2.72  | -3.23  | 8.67  | 0.37 | 1.00 | Yes |
| Bacteria | Bacteroidetes | Flavobacteriia        | Flavobacteriales       | Flavobacteriaceae       | Flavobacterium             | 1.89% | -    | -3.88  | -11.21 | 3.45  | 0.30 | 1.00 | -1.60 | -6.34  | 3.14  | 0.51 | 1.00 | Yes |
| Bacteria | Bacteroidetes | Flavobacteriia        | Flavobacteriales       | Flavobacteriaceae       | Gelidibacter               | 1.10% | -    | -0.36  | -10.05 | 9.34  | 0.94 | 1.00 | 0.77  | -5.49  | 7.04  | 0.81 | 1.00 | Yes |
| Bacteria | Bacteroidetes | Flavobacteriia        | Flavobacteriales       | Flavobacteriaceae       | Leeuwenhoekella            | 1.10% | -    | -1.45  | -11.14 | 8.25  | 0.77 | 1.00 | -3.34 | -9.60  | 2.92  | 0.30 | 1.00 | Yes |
| Bacteria | Bacteroidetes | Flavobacteriia        | Flavobacteriales       | Flavobacteriaceae       | Muricauda                  | 1.10% | -    | -2.25  | -11.97 | 7.46  | 0.65 | 1.00 | -2.36 | -8.63  | 3.92  | 0.46 | 1.00 | Yes |
| Bacteria | Bacteroidetes | Flavobacteriia        | Flavobacteriales       | Flavobacteriaceae       | Myroides                   | 0.90% | -    | -6.19  | -16.95 | 4.57  | 0.26 | 1.00 | -0.97 | -7.93  | 6.00  | 0.79 | 1.00 | Yes |
| Bacteria | Bacteroidetes | Flavobacteriia        | Flavobacteriales       | Flavobacteriaceae       | Psychroflexus              | 0.60% | -    | -2.90  | -15.87 | 10.07 | 0.66 | 1.00 | -4.02 | -12.40 | 4.36  | 0.35 | 1.00 | Yes |
| Bacteria | Bacteroidetes | Flavobacteriia        | Flavobacteriales       | Flavobacteriaceae       |                            | 3.49% | -    | -4.08  | -9.71  | 1.55  | 0.16 | 1.00 | -2.70 | -6.33  | 0.94  | 0.15 | 1.00 | Yes |
| Bacteria | Bacteroidetes | Flavobacteriia        | Flavobacteriales       |                         |                            | 0.60% | -    | -1.29  | -14.34 | 11.76 | 0.85 | 1.00 | -5.55 | -13.98 | 2.88  | 0.20 | 1.00 | Yes |
| Bacteria | Bacteroidetes | Sphingobacteriia      | Sphingobacteriales     | Sphingobacteriaceae     | Pedobacter                 | 0.20% | -    | -13.29 | -35.75 | 9.18  | 0.25 | 1.00 | -3.64 | -18.17 | 10.88 | 0.62 | 1.00 | Yes |
| Bacteria | Bacteroidetes | Sphingobacteriia      | Sphingobacteriales     | Sphingobacteriaceae     | Sphingobacterium           | 4.19% | -    | 0.55   | -4.51  | 5.62  | 0.83 | 1.00 | 0.66  | -2.61  | 3.93  | 0.69 | 1.00 | Yes |
| Bacteria | Bacteroidetes | Sphingobacteriia      | Sphingobacteriales     | Sphingobacteriaceae     |                            | 3.09% | -    | -2.48  | -8.28  | 3.33  | 0.40 | 1.00 | -3.09 | -6.83  | 0.66  | 0.11 | 1.00 | Yes |
| Bacteria | Bacteroidetes | Sphingobacteriia      | Sphingobacteriales     |                         |                            | 1.79% | -    | -5.03  | -12.63 | 2.56  | 0.19 | 1.00 | -1.86 | -6.77  | 3.05  | 0.46 | 1.00 | Yes |
| Bacteria | Bacteroidetes | VC2_1_Bac22           |                        |                         |                            | 0.10% | -    | -3.20  | -34.87 | 28.47 | 0.84 | 1.00 | -0.19 | -20.66 | 20.28 | 0.99 | 1.00 | Yes |
| Bacteria | BRC1          | NPL-UPA2              |                        |                         |                            | 0.40% | -    | -4.21  | -20.13 | 11.71 | 0.60 | 1.00 | -4.73 | -15.01 | 5.55  | 0.37 | 1.00 | Yes |
| Bacteria | BRC1          | PRR-11                |                        |                         |                            | 1.00% | -    | 1.48   | -8.67  | 11.62 | 0.78 | 1.00 | -1.23 | -7.79  | 5.33  | 0.71 | 1.00 | Yes |
| Bacteria | Chlamydiae    | Chlamydia             | Chlamydiales           | Parachlamydiaceae       | Candidatus Protochlamydia  | 0.30% | -    | -14.74 | -33.14 | 3.66  | 0.12 | 1.00 | -7.80 | -19.70 | 4.09  | 0.20 | 1.00 | Yes |
| Bacteria | Chlamydiae    | Chlamydia             | Chlamydiales           | Parachlamydiaceae       | Other                      | 0.10% | -    | -6.46  | -38.54 | 25.62 | 0.69 | 1.00 | 5.39  | -15.35 | 26.12 | 0.61 | 1.00 | Yes |
| Bacteria | Chlamydiae    | Chlamydia             | Chlamydiales           | Rhabdochlamydiaceae     | Candidatus Rhabdochlamydia | 0.40% | -    | -14.13 | -29.97 | 1.71  | 0.08 | 1.00 | -6.91 | -17.15 | 3.34  | 0.19 | 1.00 | Yes |
| Bacteria | Chlorobi      | BSV26                 | A89                    |                         |                            | 0.20% | -    | 0.93   | -21.46 | 23.31 | 0.94 | 1.00 | 8.24  | -6.22  | 22.70 | 0.26 | 1.00 | Yes |
| Bacteria | Chlorobi      | Ignavibacteria        | Ignavibacteriales      | [Melioribacteraceae]    |                            | 0.30% | -    | 0.86   | -17.50 | 19.22 | 0.93 | 1.00 | -8.40 | -20.25 | 3.46  | 0.16 | 1.00 | Yes |
| Bacteria | Chlorobi      | Ignavibacteria        | Ignavibacteriales      | Ignavibacteriaceae      |                            | 1.60% | -    | 5.72   | -2.26  | 13.70 | 0.16 | 1.00 | 2.14  | -3.02  | 7.30  | 0.42 | 1.00 | Yes |
| Bacteria | Chlorobi      | OPB56                 |                        |                         |                            | 1.50% | -    | -2.56  | -10.93 | 5.82  | 0.55 | 1.00 | -1.02 | -6.44  | 4.39  | 0.71 | 1.00 | Yes |
| Bacteria | Chlorobi      | SJA-28                |                        |                         |                            | 1.60% | -    | -1.45  | -9.56  | 6.66  | 0.73 | 1.00 | -1.74 | -6.98  | 3.50  | 0.52 | 1.00 | Yes |
| Bacteria | Chloroflexi   | Anaerolineae          | A31                    |                         |                            | 0.70% | -    | -10.33 | -22.34 | 1.67  | 0.09 | 1.00 | -4.63 | -12.40 | 3.13  | 0.24 | 1.00 | Yes |
| Bacteria | Chloroflexi   | Anaerolineae          | Anaerolineales         | Anaerolinaceae          | Longilinea                 | 0.40% | -    | 0.74   | -15.19 | 16.66 | 0.93 | 1.00 | 3.76  | -6.53  | 14.05 | 0.47 | 1.00 | Yes |
| Bacteria | Chloroflexi   | Anaerolineae          | Anaerolineales         | Anaerolinaceae          | SHD-231                    | 0.20% | -    | -0.65  | -23.08 | 21.78 | 0.95 | 1.00 | 2.60  | -11.90 | 17.09 | 0.73 | 1.00 | Yes |
| Bacteria | Chloroflexi   | Anaerolineae          | Anaerolineales         | Anaerolinaceae          | T78                        | 0.20% | -    | -9.23  | -31.59 | 13.14 | 0.42 | 1.00 | -5.99 | -20.44 | 8.47  | 0.42 | 1.00 | Yes |
| Bacteria | Chloroflexi   | Anaerolineae          | Anaerolineales         | Anaerolinaceae          |                            | 0.10% | -    | 13.40  | -18.19 | 45.00 | 0.41 | 1.00 | 17.50 | -2.89  | 37.90 | 0.09 | 1.00 | Yes |
| Bacteria | Chloroflexi   | Anaerolineae          | Ardenscatenales        | Ardenscatenaceae        | Ardenscatena               | 0.20% | -    | -13.60 | -36.05 | 8.86  | 0.23 | 1.00 | -6.73 | -21.25 | 7.78  | 0.36 | 1.00 | Yes |
| Bacteria | Chloroflexi   | Anaerolineae          | Caldilineales          | Caldilineaceae          | Caldilinea                 | 0.30% | -    | -14.33 | -32.70 | 4.03  | 0.13 | 1.00 | -4.87 | -16.75 | 7.01  | 0.42 | 1.00 | Yes |
| Bacteria | Chloroflexi   | Anaerolineae          | Caldilineales          | Caldilineaceae          |                            | 1.69% | -    | -3.95  | -11.81 | 3.91  | 0.32 | 1.00 | -2.09 | -7.17  | 2.99  | 0.42 | 1.00 | Yes |
| Bacteria | Chloroflexi   | Anaerolineae          | CFB-26                 |                         |                            | 0.40% | -    | -2.23  | -18.23 | 13.76 | 0.78 | 1.00 | -2.47 | -12.80 | 7.86  | 0.64 | 1.00 | Yes |
| Bacteria | Chloroflexi   | Anaerolineae          | DRC31                  |                         |                            | 0.90% | -    | -7.30  | -18.01 | 3.41  | 0.18 | 1.00 | -4.01 | -10.93 | 2.92  | 0.26 | 1.00 | Yes |
| Bacteria | Chloroflexi   | Anaerolineae          | envOPS12               |                         |                            | 0.70% | -    | -1.93  | -14.09 | 10.23 | 0.76 | 1.00 | -1.89 | -9.74  | 5.97  | 0.64 | 1.00 | Yes |
| Bacteria | Chloroflexi   | Anaerolineae          | GCA004                 |                         |                            | 0.20% | -    | -1.20  | -23.62 | 21.23 | 0.92 | 1.00 | 6.64  | -7.85  | 21.13 | 0.37 | 1.00 | Yes |
| Bacteria | Chloroflexi   | Anaerolineae          | H39                    |                         |                            | 0.20% | -    | -13.60 | -36.05 | 8.86  | 0.23 | 1.00 | -6.73 | -21.25 | 7.78  | 0.36 | 1.00 | Yes |
| Bacteria | Chloroflexi   | Anaerolineae          | OPB11                  |                         |                            | 0.10% | -    | 31.03  | -0.53  | 62.58 | 0.05 | 0.99 | 37.22 | 16.92  | 57.52 | 0.00 | 1.00 | Yes |
| Bacteria | Chloroflexi   | Anaerolineae          | S0208                  |                         |                            | 0.30% | -    | -5.01  | -23.26 | 13.24 | 0.59 | 1.00 | -7.35 | -19.14 | 4.44  | 0.22 | 1.00 | Yes |
| Bacteria | Chloroflexi   | Anaerolineae          | SBR1031                | A4b                     |                            | 1.79% | -    | 2.65   | -5.03  | 10.33 | 0.50 | 1.00 | 1.32  | -3.64  | 6.28  | 0.60 | 1.00 | Yes |
| Bacteria | Chloroflexi   | Anaerolineae          | SBR1031                | SHA-31                  |                            | 0.10% | -    | -12.98 | -44.72 | 18.76 | 0.42 | 1.00 | -5.58 | -26.09 | 14.94 | 0.59 | 1.00 | Yes |
| Bacteria | Chloroflexi   | Anaerolineae          | SHA-20                 |                         |                            | 0.10% | -    | 13.40  | -18.19 | 45.00 | 0.41 | 1.00 | 17.50 | -2.89  | 37.90 | 0.09 | 1.00 | Yes |
| Bacteria | Chloroflexi   | Anaerolineae          |                        |                         |                            | 0.90% | -    | 0.45   | -10.25 | 11.16 | 0.93 | 1.00 | 3.89  | -3.02  | 10.81 | 0.27 | 1.00 | Yes |
| Bacteria | Chloroflexi   | C0119                 |                        |                         |                            | 0.20% | -    | 1.81   | -20.62 | 24.23 | 0.87 | 1.00 | 3.92  | -10.57 | 18.42 | 0.60 | 1.00 | Yes |
| Bacteria | Chloroflexi   | Chloroflexi           | [Roseiflexales]        | [Roseiflexaceae]        | Roseiflexus                | 0.30% | -    | 5.25   | -13.08 | 23.58 | 0.57 | 1.00 | 4.03  | -7.81  | 15.88 | 0.50 | 1.00 | Yes |
| Bacteria | Chloroflexi   | Chloroflexi           | AKIW781                |                         |                            | 0.20% | -    | -13.60 | -36.05 | 8.86  | 0.23 | 1.00 | -6.73 | -21.25 | 7.78  | 0.36 | 1.00 | Yes |
| Bacteria | Chloroflexi   | Chloroflexi           | Herpetosiphonales      |                         |                            | 0.20% | -    | -13.60 | -36.05 | 8.86  | 0.23 | 1.00 | -6.73 | -21.25 | 7.78  | 0.36 | 1.00 | Yes |
| Bacteria | Chloroflexi   | Dehalococcoidetes     | Dehalococcoidales      | Dehalococcoidaceae      |                            | 0.10% | -    | -7.23  | -38.87 | 24.41 | 0.65 | 1.00 | 1.95  | -18.50 | 22.40 | 0.85 | 1.00 | Yes |
| Bacteria | Chloroflexi   | Ellin6529             |                        |                         |                            | 2.19% | -    | 2.50   | -4.34  | 9.34  | 0.47 | 1.00 | 1.93  | -2.49  | 6.35  | 0.39 | 1.00 | Yes |
| Bacteria | Chloroflexi   | Gitt-GS-136           |                        |                         |                            | 1.10% | -    | -9.02  | -18.79 | 0.75  | 0.07 | 0.99 | -5.76 | -12.08 | 0.55  | 0.07 | 1.00 | Yes |
| Bacteria | Chloroflexi   | Ktedonobacteria       | Ktedonobacterales      | Ktedonobacteraceae      |                            | 0.10% | -    | -7.59  | -39.24 | 24.06 | 0.64 | 1.00 | 0.78  | -19.67 | 21.24 | 0.94 | 1.00 | Yes |
| Bacteria | Chloroflexi   | Ktedonobacteria       | Thermogemmatissporales | Thermogemmatissporaceae |                            | 0.10% | -    | -12.38 | -44.43 | 19.66 | 0.45 | 1.00 | -0.99 | -21.70 | 19.72 | 0.93 | 1.00 | Yes |
| Bacteria | Chloroflexi   | S085                  |                        |                         |                            | 0.40% | -    | 1.79   | -14.11 | 17.69 | 0.83 | 1.00 | 0.39  | -9.88  | 10.67 | 0.94 | 1.00 | Yes |
| Bacteria | Chloroflexi   | Thermomicrobia        | AKYG1722               |                         |                            | 0.20% | -    | -13.60 | -36.05 | 8.86  | 0.23 | 1.00 | -6.73 | -21.25 | 7.78  | 0.36 | 1.00 | Yes |
| Bacteria | Chloroflexi   | Thermomicrobia        | JG30-KF-CM45           |                         |                            | 3.59% | -    | 1.30   | -4.11  | 6.71  | 0.64 | 1.00 | 1.60  | -1.89  | 5.10  | 0.37 | 1.00 | Yes |
| Bacteria | Chloroflexi   | TK10                  | AKYG885                | 5B-12                   |                            | 0.20% | -    | 8.52   | -13.95 | 30.99 | 0.46 | 1.00 | 5.18  | -9.34  | 19.70 | 0.48 | 1.00 | Yes |
| Bacteria | Chloroflexi   | TK10                  | AKYG885                | Dolo_23                 |                            | 0.50% | -    | -5.52  | -19.86 | 8.83  | 0.45 | 1.00 | 1.86  | -7.41  | 11.14 | 0.69 | 1.00 | Yes |
| Bacteria | Chloroflexi   | TK10                  | B07_WMSP1              |                         |                            | 0.20% | -    | 24.27  | 1.91   | 46.64 | 0.03 | 0.99 | 15.76 | 1.30   | 30.21 | 0.03 | 1.00 | Yes |
| Bacteria | Chloroflexi   | TK17                  | mle1-48                |                         |                            | 0.70% | -    | -8.20  | -20.31 | 3.92  | 0.18 | 1.00 | -6.92 | -14.74 | 0.91  | 0.08 | 1.00 | Yes |
| Bacteria | Chloroflexi   |                       |                        |                         |                            | 0.20% | -    | -13.60 | -36.05 | 8.86  | 0.23 | 1.00 | -6.73 | -21.25 | 7.78  | 0.36 | 1.00 | Yes |
| Bacteria | Cyanobacteria | 4C0d-2                | MLE1-12                |                         |                            | 0.70% | -    | -3.81  | -15.85 | 8.23  | 0.53 | 1.00 | 0.38  | -7.40  | 8.16  | 0.92 | 1.00 | Yes |
| Bacteria | Cyanobacteria | 4C0d-2                | SM1D11                 |                         |                            | 0.20% | -    | -16.16 | -38.77 | 6.44  | 0.16 | 1.00 | -5.87 | -20.49 | 8.75  | 0.43 | 1.00 | Yes |
| Bacteria | Cyanobacteria | 4C0d-2                | YS2                    |                         |                            | 0.39  | 0.60 | -0.26  | -2.05  | 1.53  | 0.77 | 1.00 | 0.31  | -0.84  | 1.47  | 0.59 | 1.00 | No  |
| Bacteria | Cyanobacteria | Chloroplast           | Chlorophyta            | Trebouxiophyceae        | Coccomyxa                  | 0.50% | -    | 2.46   | -11.84 | 16.76 | 0.74 | 1.00 | -0.44 | -9.68  | 8.80  | 0.92 | 1.00 | Yes |
| Bacteria | Cyanobacteria | Chloroplast           | Chlorophyta            |                         |                            | 0.10% | -    | -9.17  | -40.80 | 22.46 | 0.57 | 1.00 | -2.05 | -22.49 | 18.39 | 0.84 | 1.00 | Yes |
| Bacteria | Cyanobacteria | Chloroplast           | Streptophyta           |                         |                            | 0.34  | 0.47 | 0.07   | -2.08  | 2.21  | 0.95 | 1.00 | -0.12 | -1.50  | 1.26  | 0.86 | 1.00 | No  |
| Bacteria | Cyanobacteria | ML635J-21             |                        |                         |                            | 0.10% | -    | 13.40  | -18.19 | 45.00 | 0.41 | 1.00 | 17.50 | -2.89  | 37.90 | 0.09 | 1.00 | Yes |
| Bacteria | Cyanobacteria | Oscillatoriophyceidae | Chroococcales          | Xenococcaceae           |                            | 0.10% | -    | -12.98 | -44.72 | 18.76 | 0.42 | 1.00 | -5.58 | -26.09 | 14.94 | 0.59 | 1.00 | Yes |

|          |                 |                         |                   |                        |                     |        |      |        |        |       |      |      |        |        |       |      |      |     |
|----------|-----------------|-------------------------|-------------------|------------------------|---------------------|--------|------|--------|--------|-------|------|------|--------|--------|-------|------|------|-----|
| Bacteria | Cyanobacteria   | Oscillatoriothycidaceae | Oscillatoriales   | Phormidiaceae          | Other               | 0.10%  | -    | -8.84  | -40.80 | 23.12 | 0.59 | 1.00 | -6.62  | -27.27 | 14.03 | 0.53 | 1.00 | Yes |
| Bacteria | Cyanobacteria   | Oscillatoriothycidaceae | Oscillatoriales   | Phormidiaceae          | Phormidium          | 0.10%  | -    | -16.60 | -48.30 | 15.11 | 0.30 | 1.00 | -9.72  | -30.21 | 10.77 | 0.35 | 1.00 | Yes |
| Bacteria | Cyanobacteria   | Synechococcophycidaceae | Synechococcales   | Synechococcaceae       | Synechococcus       | 0.90%  | -    | 1.11   | -9.51  | 11.73 | 0.84 | 1.00 | -0.53  | -7.40  | 6.33  | 0.88 | 1.00 | Yes |
| Bacteria | Deferribacteres | Deferribacteres         | Deferribacterales | Deferribacteraceae     | Mucispirillum       | 3.69%  | -    | 0.87   | -4.62  | 6.35  | 0.76 | 1.00 | 0.44   | -3.10  | 3.99  | 0.81 | 1.00 | Yes |
| Bacteria | Elusimicrobia   | Elusimicrobia           | Elusimicrobiales  | Elusimicrobiaceae      |                     | 4.29%  | -    | -0.32  | -5.33  | 4.69  | 0.90 | 1.00 | 0.55   | -2.69  | 3.79  | 0.74 | 1.00 | Yes |
| Bacteria | Elusimicrobia   | Elusimicrobia           | FAC88             |                        |                     | 0.10%  | -    | -23.98 | -55.58 | 7.61  | 0.14 | 1.00 | -3.26  | -23.70 | 17.18 | 0.75 | 1.00 | Yes |
| Bacteria | Elusimicrobia   | Endomicrobia            |                   |                        |                     | 0.10%  | -    | -1.62  | -33.29 | 30.06 | 0.92 | 1.00 | 7.84   | -12.62 | 28.31 | 0.45 | 1.00 | Yes |
| Bacteria | FBP             |                         |                   |                        |                     | 1.20%  | -    | -0.99  | -10.19 | 8.21  | 0.83 | 1.00 | -0.01  | -5.95  | 5.94  | 1.00 | 1.00 | Yes |
| Bacteria | FCPU426         |                         |                   |                        |                     | 0.20%  | -    | 3.70   | -18.67 | 26.06 | 0.75 | 1.00 | 6.11   | -8.34  | 20.56 | 0.41 | 1.00 | Yes |
| Bacteria | Fibrobacteres   | Fibrobacteria           | Fibrobacterales   | Fibrobacteraceae       | Fibrobacter         | 1.10%  | -    | -5.15  | -14.76 | 4.46  | 0.29 | 1.00 | -5.53  | -11.74 | 0.67  | 0.08 | 1.00 | Yes |
| Bacteria | Firmicutes      | Bacilli                 | Bacillales        | [Exiguobacteraceae]    | Exiguobacterium     | 4.79%  | -    | 2.15   | -2.59  | 6.89  | 0.37 | 1.00 | -0.04  | -3.10  | 3.03  | 0.98 | 1.00 | Yes |
| Bacteria | Firmicutes      | Bacilli                 | Bacillales        | [Thermicanaceae]       | Thermicanus         | 0.40%  | -    | -0.40  | -16.22 | 15.43 | 0.96 | 1.00 | -3.89  | -14.12 | 6.33  | 0.46 | 1.00 | Yes |
| Bacteria | Firmicutes      | Bacilli                 | Bacillales        | Alicyclobacillaceae    | Alicyclobacillus    | 0.10%  | -    | -18.13 | -50.14 | 13.87 | 0.27 | 1.00 | -7.39  | -28.08 | 13.30 | 0.48 | 1.00 | Yes |
| Bacteria | Firmicutes      | Bacilli                 | Bacillales        | Alicyclobacillaceae    | Alicyclobacillus    | 0.30%  | -    | 1.43   | -17.00 | 19.85 | 0.88 | 1.00 | 0.52   | -11.39 | 12.42 | 0.93 | 1.00 | Yes |
| Bacteria | Firmicutes      | Bacilli                 | Bacillales        | Alicyclobacillaceae    | Alicyclobacillus    | 0.10%  | -    | -11.71 | -43.55 | 20.13 | 0.47 | 1.00 | -12.28 | -32.84 | 8.29  | 0.24 | 1.00 | Yes |
| Bacteria | Firmicutes      | Bacilli                 | Bacillales        | Bacillaceae            | Anaerobacillus      | 3.99%  | -    | 1.98   | -3.16  | 7.12  | 0.45 | 1.00 | 1.33   | -1.99  | 4.65  | 0.43 | 1.00 | Yes |
| Bacteria | Firmicutes      | Bacilli                 | Bacillales        | Bacillaceae            | Anoxybacillus       | 23.33% | -    | 0.20   | -2.22  | 2.61  | 0.87 | 1.00 | 0.07   | -1.49  | 1.63  | 0.93 | 1.00 | Yes |
| Bacteria | Firmicutes      | Bacilli                 | Bacillales        | Bacillaceae            | Bacillus            | 0.30   | 0.42 | -1.07  | -3.68  | 1.54  | 0.42 | 1.00 | -0.01  | -1.70  | 1.67  | 0.99 | 1.00 | No  |
| Bacteria | Firmicutes      | Bacilli                 | Bacillales        | Bacillaceae            | Geobacillus         | 10.07% | -    | -1.43  | -4.82  | 1.97  | 0.41 | 1.00 | 0.06   | -2.13  | 2.26  | 0.95 | 1.00 | Yes |
| Bacteria | Firmicutes      | Bacilli                 | Bacillales        | Bacillaceae            | Natronobacillus     | 1.30%  | -    | -9.67  | -18.62 | -0.72 | 0.03 | 0.99 | -5.46  | -11.25 | 0.33  | 0.06 | 1.00 | Yes |
| Bacteria | Firmicutes      | Bacilli                 | Bacillales        | Bacillaceae            | Oceanobacillus      | 0.10%  | -    | -4.43  | -36.08 | 27.21 | 0.78 | 1.00 | -4.78  | -25.23 | 15.67 | 0.65 | 1.00 | Yes |
| Bacteria | Firmicutes      | Bacilli                 | Bacillales        | Bacillaceae            | Other               | 3.99%  | -    | -1.01  | -6.19  | 4.16  | 0.70 | 1.00 | -1.44  | -4.79  | 1.90  | 0.40 | 1.00 | Yes |
| Bacteria | Firmicutes      | Bacilli                 | Bacillales        | Bacillaceae            | Virgibacillus       | 0.50%  | -    | -2.42  | -16.71 | 11.86 | 0.74 | 1.00 | -3.22  | -12.45 | 6.01  | 0.49 | 1.00 | Yes |
| Bacteria | Firmicutes      | Bacilli                 | Bacillales        | Bacillaceae            | Other               | 5.98%  | -    | 1.66   | -2.55  | 5.88  | 0.44 | 1.00 | -1.30  | -4.02  | 1.43  | 0.35 | 1.00 | Yes |
| Bacteria | Firmicutes      | Bacilli                 | Bacillales        | Other                  | Other               | 0.34   | 0.41 | -2.57  | -5.03  | -0.12 | 0.04 | 0.99 | -0.87  | -2.46  | 0.72  | 0.28 | 1.00 | No  |
| Bacteria | Firmicutes      | Bacilli                 | Bacillales        | Paenibacillaceae       | Ammoniphilus        | 0.30%  | -    | -7.09  | -25.43 | 11.26 | 0.45 | 1.00 | -2.35  | -14.21 | 9.51  | 0.70 | 1.00 | Yes |
| Bacteria | Firmicutes      | Bacilli                 | Bacillales        | Paenibacillaceae       | Aneurinibacillus    | 0.50%  | -    | 14.97  | 0.81   | 29.14 | 0.04 | 0.99 | 1.96   | -7.22  | 11.13 | 0.68 | 1.00 | Yes |
| Bacteria | Firmicutes      | Bacilli                 | Bacillales        | Paenibacillaceae       | Brevibacillus       | 2.59%  | -    | -0.07  | -6.52  | 6.37  | 0.98 | 1.00 | 2.22   | -1.94  | 6.39  | 0.29 | 1.00 | Yes |
| Bacteria | Firmicutes      | Bacilli                 | Bacillales        | Paenibacillaceae       | Cohnella            | 0.10%  | -    | 2.69   | -29.32 | 34.69 | 0.87 | 1.00 | -11.30 | -31.98 | 9.37  | 0.28 | 1.00 | Yes |
| Bacteria | Firmicutes      | Bacilli                 | Bacillales        | Paenibacillaceae       | Other               | 0.70%  | -    | 5.15   | -6.87  | 17.16 | 0.40 | 1.00 | -1.41  | -9.18  | 6.35  | 0.72 | 1.00 | Yes |
| Bacteria | Firmicutes      | Bacilli                 | Bacillales        | Paenibacillaceae       | Paenibacillus       | 5.58%  | -    | 0.02   | -4.37  | 4.42  | 0.99 | 1.00 | 0.53   | -2.31  | 3.37  | 0.71 | 1.00 | Yes |
| Bacteria | Firmicutes      | Bacilli                 | Bacillales        | Paenibacillaceae       | Paenibacillus       | 1.79%  | -    | 4.27   | -3.29  | 11.84 | 0.27 | 1.00 | 1.75   | -3.14  | 6.64  | 0.48 | 1.00 | Yes |
| Bacteria | Firmicutes      | Bacilli                 | Bacillales        | Planococcaceae         | Lysinibacillus      | 0.90%  | -    | -1.28  | -11.92 | 9.35  | 0.81 | 1.00 | -1.44  | -8.32  | 5.43  | 0.68 | 1.00 | Yes |
| Bacteria | Firmicutes      | Bacilli                 | Bacillales        | Planococcaceae         | Other               | 6.68%  | -    | 1.48   | -2.52  | 5.48  | 0.47 | 1.00 | -0.73  | -3.32  | 1.86  | 0.58 | 1.00 | Yes |
| Bacteria | Firmicutes      | Bacilli                 | Bacillales        | Planococcaceae         | Planomicrobium      | 1.89%  | -    | 1.35   | -6.00  | 8.70  | 0.72 | 1.00 | 5.20   | 0.46   | 9.94  | 0.03 | 1.00 | Yes |
| Bacteria | Firmicutes      | Bacilli                 | Bacillales        | Planococcaceae         | Rummelibacillus     | 0.90%  | -    | -3.72  | -14.35 | 6.92  | 0.49 | 1.00 | -1.98  | -8.85  | 4.90  | 0.57 | 1.00 | Yes |
| Bacteria | Firmicutes      | Bacilli                 | Bacillales        | Planococcaceae         | Solibacillus        | 0.30%  | -    | -5.11  | -23.53 | 13.31 | 0.59 | 1.00 | -2.41  | -14.31 | 9.49  | 0.69 | 1.00 | Yes |
| Bacteria | Firmicutes      | Bacilli                 | Bacillales        | Planococcaceae         | Sporosarcina        | 2.59%  | -    | -3.65  | -9.98  | 2.68  | 0.26 | 1.00 | -3.80  | -7.89  | 0.28  | 0.07 | 1.00 | Yes |
| Bacteria | Firmicutes      | Bacilli                 | Bacillales        | Planococcaceae         | Other               | 4.79%  | -    | -2.36  | -7.08  | 2.36  | 0.33 | 1.00 | -1.99  | -5.04  | 1.06  | 0.20 | 1.00 | Yes |
| Bacteria | Firmicutes      | Bacilli                 | Bacillales        | Sporolactobacillaceae  | Other               | 0.90%  | -    | -4.21  | -14.79 | 6.38  | 0.44 | 1.00 | -0.43  | -7.27  | 6.42  | 0.90 | 1.00 | Yes |
| Bacteria | Firmicutes      | Bacilli                 | Bacillales        | Sporolactobacillaceae  | Sporolactobacillus  | 0.10%  | -    | -13.37 | -45.10 | 18.35 | 0.41 | 1.00 | -4.22  | -24.73 | 16.29 | 0.69 | 1.00 | Yes |
| Bacteria | Firmicutes      | Bacilli                 | Bacillales        | Staphylococcaceae      | Jeotgalicoccus      | 9.97%  | -    | -3.12  | -6.50  | 0.25  | 0.07 | 0.99 | -1.47  | -3.65  | 0.72  | 0.19 | 1.00 | Yes |
| Bacteria | Firmicutes      | Bacilli                 | Bacillales        | Staphylococcaceae      | Macrococcus         | 17.35% | -    | -1.81  | -4.47  | 0.86  | 0.18 | 1.00 | 0.28   | -1.44  | 2.01  | 0.75 | 1.00 | Yes |
| Bacteria | Firmicutes      | Bacilli                 | Bacillales        | Staphylococcaceae      | Other               | 0.40%  | -    | -12.46 | -28.37 | 3.45  | 0.12 | 1.00 | -4.95  | -15.24 | 5.33  | 0.34 | 1.00 | Yes |
| Bacteria | Firmicutes      | Bacilli                 | Bacillales        | Staphylococcaceae      | Salinicoccus        | 5.48%  | -    | 0.14   | -4.27  | 4.55  | 0.95 | 1.00 | -1.58  | -4.42  | 1.27  | 0.28 | 1.00 | Yes |
| Bacteria | Firmicutes      | Bacilli                 | Bacillales        | Staphylococcaceae      | Staphylococcus      | 16.05% | -    | 0.76   | -1.99  | 3.51  | 0.59 | 1.00 | 0.16   | -1.62  | 1.93  | 0.86 | 1.00 | Yes |
| Bacteria | Firmicutes      | Bacilli                 | Bacillales        | Thermoactinomycetaceae | Planifilum          | 1.00%  | -    | -1.45  | -11.55 | 8.65  | 0.78 | 1.00 | -1.00  | -7.53  | 5.52  | 0.76 | 1.00 | Yes |
| Bacteria | Firmicutes      | Bacilli                 | Bacillales        | Thermoactinomycetaceae | Other               | 0.40%  | -    | -3.42  | -19.44 | 12.59 | 0.68 | 1.00 | -0.06  | -10.41 | 10.29 | 0.99 | 1.00 | Yes |
| Bacteria | Firmicutes      | Bacilli                 | Bacillales        | Other                  | Other               | 0.18   | 0.30 | 0.13   | -3.18  | 3.44  | 0.94 | 1.00 | -0.23  | -2.37  | 1.91  | 0.83 | 1.00 | No  |
| Bacteria | Firmicutes      | Bacilli                 | Gemellales        | Gemellaceae            | Gemella             | 7.18%  | -    | 0.35   | -3.52  | 4.22  | 0.86 | 1.00 | 1.33   | -1.17  | 3.84  | 0.30 | 1.00 | Yes |
| Bacteria | Firmicutes      | Bacilli                 | Gemellales        | Gemellaceae            | Other               | 0.50%  | -    | -11.85 | -26.01 | 2.31  | 0.10 | 1.00 | -4.05  | -13.21 | 5.11  | 0.39 | 1.00 | Yes |
| Bacteria | Firmicutes      | Bacilli                 | Gemellales        | Gemellaceae            | Other               | 1.04   | 0.31 | 1.66   | -1.65  | 4.96  | 0.33 | 1.00 | 1.46   | -0.67  | 3.60  | 0.18 | 1.00 | No  |
| Bacteria | Firmicutes      | Bacilli                 | Haloplasmatales   | Haloplasmataceae       | Other               | 0.20%  | -    | 26.96  | 4.61   | 49.31 | 0.02 | 0.99 | 4.53   | -9.96  | 19.01 | 0.54 | 1.00 | Yes |
| Bacteria | Firmicutes      | Bacilli                 | Lactobacillales   | Aerococcaceae          | Aerococcus          | 4.49%  | -    | 3.00   | -1.86  | 7.85  | 0.23 | 1.00 | 0.06   | -3.08  | 3.20  | 0.97 | 1.00 | Yes |
| Bacteria | Firmicutes      | Bacilli                 | Lactobacillales   | Aerococcaceae          | Alkalibacterium     | 0.40%  | -    | -11.97 | -27.83 | 3.89  | 0.14 | 1.00 | -6.38  | -16.63 | 3.88  | 0.22 | 1.00 | Yes |
| Bacteria | Firmicutes      | Bacilli                 | Lactobacillales   | Aerococcaceae          | Alloicoccus         | 3.89%  | -    | -1.29  | -6.51  | 3.93  | 0.63 | 1.00 | 0.63   | -2.74  | 4.00  | 0.72 | 1.00 | Yes |
| Bacteria | Firmicutes      | Bacilli                 | Lactobacillales   | Aerococcaceae          | Facklamia           | 11.86% | -    | -1.49  | -4.60  | 1.62  | 0.35 | 1.00 | -1.34  | -3.35  | 0.67  | 0.19 | 1.00 | Yes |
| Bacteria | Firmicutes      | Bacilli                 | Lactobacillales   | Aerococcaceae          | Marinilactibacillus | 0.90%  | -    | -1.20  | -11.81 | 9.41  | 0.82 | 1.00 | -2.81  | -9.67  | 4.05  | 0.42 | 1.00 | Yes |
| Bacteria | Firmicutes      | Bacilli                 | Lactobacillales   | Aerococcaceae          | Other               | 0.27   | 0.30 | 1.31   | -2.08  | 4.70  | 0.45 | 1.00 | 1.09   | -1.10  | 3.28  | 0.33 | 1.00 | No  |
| Bacteria | Firmicutes      | Bacilli                 | Lactobacillales   | Aerococcaceae          | Other               | 9.87%  | -    | -4.04  | -7.47  | -0.61 | 0.02 | 0.99 | -1.24  | -3.46  | 0.98  | 0.27 | 1.00 | Yes |
| Bacteria | Firmicutes      | Bacilli                 | Lactobacillales   | Carnobacteriaceae      | Carnobacterium      | 0.80%  | -    | -0.69  | -11.92 | 10.53 | 0.90 | 1.00 | 1.57   | -5.69  | 8.82  | 0.67 | 1.00 | Yes |
| Bacteria | Firmicutes      | Bacilli                 | Lactobacillales   | Carnobacteriaceae      | Granulicatella      | 0.15   | 0.21 | 4.10   | -0.77  | 8.98  | 0.10 | 1.00 | 1.13   | -2.02  | 4.28  | 0.48 | 1.00 | No  |
| Bacteria | Firmicutes      | Bacilli                 | Lactobacillales   | Carnobacteriaceae      | Other               | 0.10%  | -    | -5.15  | -36.81 | 26.51 | 0.75 | 1.00 | -1.96  | -22.42 | 18.50 | 0.85 | 1.00 | Yes |
| Bacteria | Firmicutes      | Bacilli                 | Lactobacillales   | Enterococcaceae        | Enterococcus        | 0.30   | 0.34 | -1.14  | -4.08  | 1.81  | 0.45 | 1.00 | -1.18  | -3.08  | 0.72  | 0.22 | 1.00 | No  |
| Bacteria | Firmicutes      | Bacilli                 | Lactobacillales   | Enterococcaceae        | Other               | 6.38%  | -    | 0.99   | -3.10  | 5.08  | 0.63 | 1.00 | -0.46  | -3.10  | 2.18  | 0.73 | 1.00 | Yes |
| Bacteria | Firmicutes      | Bacilli                 | Lactobacillales   | Enterococcaceae        | Vagococcus          | 3.49%  | -    | 0.34   | -5.13  | 5.82  | 0.90 | 1.00 | 1.59   | -1.95  | 5.13  | 0.38 | 1.00 | Yes |
| Bacteria | Firmicutes      | Bacilli                 | Lactobacillales   | Enterococcaceae        | Other               | 2.29%  | -    | -1.17  | -7.89  | 5.56  | 0.73 | 1.00 | -1.99  | -6.33  | 2.35  | 0.37 | 1.00 | Yes |
| Bacteria | Firmicutes      | Bacilli                 | Lactobacillales   | Lactobacillaceae       | Lactobacillus*      | 2.08   | 0.60 | 1.69   | -0.03  | 3.40  | 0.05 | 0.99 | 1.19   | 0.08   | 2.30  | 0.04 | 1.00 | No  |

|          |            |            |                  |                        |                             |        |      |        |        |       |      |      |       |        |       |      |      |     |
|----------|------------|------------|------------------|------------------------|-----------------------------|--------|------|--------|--------|-------|------|------|-------|--------|-------|------|------|-----|
| Bacteria | Firmicutes | Bacilli    | Lactobacillales  | Lactobacillaceae       | Other                       | 2.79%  | -    | -0.77  | -6.81  | 5.28  | 0.80 | 1.00 | -1.66 | -5.56  | 2.25  | 0.40 | 1.00 | Yes |
| Bacteria | Firmicutes | Bacilli    | Lactobacillales  | Lactobacillaceae       | Pediococcus                 | 14.76% | -    | 0.24   | -2.59  | 3.07  | 0.87 | 1.00 | 0.32  | -1.51  | 2.16  | 0.73 | 1.00 | Yes |
| Bacteria | Firmicutes | Bacilli    | Lactobacillales  | Lactobacillaceae       |                             | 0.33   | 0.48 | -0.86  | -2.93  | 1.21  | 0.42 | 1.00 | 0.27  | -1.07  | 1.61  | 0.70 | 1.00 | No  |
| Bacteria | Firmicutes | Bacilli    | Lactobacillales  | Leuconostocaceae       | Fructobacillus              | 0.50%  | -    | -3.06  | -17.23 | 11.11 | 0.67 | 1.00 | -1.59 | -10.75 | 7.57  | 0.73 | 1.00 | Yes |
| Bacteria | Firmicutes | Bacilli    | Lactobacillales  | Leuconostocaceae       | Leuconostoc                 | 0.55   | 0.52 | -0.10  | -2.06  | 1.86  | 0.92 | 1.00 | 0.45  | -0.82  | 1.71  | 0.49 | 1.00 | No  |
| Bacteria | Firmicutes | Bacilli    | Lactobacillales  | Leuconostocaceae       | Oenococcus                  | 0.10%  | -    | -10.97 | -42.66 | 20.71 | 0.50 | 1.00 | -3.93 | -24.40 | 16.55 | 0.71 | 1.00 | Yes |
| Bacteria | Firmicutes | Bacilli    | Lactobacillales  | Leuconostocaceae       | Other                       | 4.09%  | -    | 4.53   | -0.60  | 9.67  | 0.08 | 1.00 | 1.07  | -2.25  | 4.40  | 0.53 | 1.00 | Yes |
| Bacteria | Firmicutes | Bacilli    | Lactobacillales  | Leuconostocaceae       | Weissella                   | 20.54% | -    | 1.71   | -0.78  | 4.20  | 0.18 | 1.00 | 1.46  | -0.14  | 3.07  | 0.07 | 1.00 | Yes |
| Bacteria | Firmicutes | Bacilli    | Lactobacillales  | Leuconostocaceae*      |                             | 1.22   | 0.72 | 0.47   | -1.06  | 2.00  | 0.55 | 1.00 | 0.30  | -0.69  | 1.30  | 0.55 | 1.00 | No  |
| Bacteria | Firmicutes | Bacilli    | Lactobacillales  | Other                  | Other                       | 0.12   | 0.21 | 0.99   | -3.76  | 5.74  | 0.68 | 1.00 | 0.52  | -2.55  | 3.59  | 0.74 | 1.00 | No  |
| Bacteria | Firmicutes | Bacilli    | Lactobacillales  | Streptococcaceae       | Streptococcus               | 1.15   | 0.69 | -0.35  | -1.88  | 1.19  | 0.66 | 1.00 | 0.08  | -0.91  | 1.07  | 0.87 | 1.00 | No  |
| Bacteria | Firmicutes | Bacilli    | Lactobacillales  | Streptococcaceae       | Other                       | 1.10%  | -    | 2.61   | -6.98  | 12.21 | 0.59 | 1.00 | 2.03  | -4.17  | 8.23  | 0.52 | 1.00 | Yes |
| Bacteria | Firmicutes | Bacilli    | Lactobacillales  | Streptococcaceae       | Streptococcus               | 2.83   | 0.40 | 0.38   | -2.20  | 2.95  | 0.77 | 1.00 | -0.08 | -1.75  | 1.58  | 0.92 | 1.00 | No  |
| Bacteria | Firmicutes | Bacilli    | Lactobacillales  | Streptococcaceae       |                             | 0.60%  | -    | -3.15  | -16.14 | 9.84  | 0.63 | 1.00 | -4.63 | -13.02 | 3.76  | 0.28 | 1.00 | Yes |
| Bacteria | Firmicutes | Bacilli    | Lactobacillales  |                        |                             | 11.07% | -    | -1.53  | -4.75  | 1.69  | 0.35 | 1.00 | -0.25 | -2.33  | 1.83  | 0.81 | 1.00 | Yes |
| Bacteria | Firmicutes | Bacilli    | Other            | Other                  |                             | 1.89%  | -    | -5.22  | -12.56 | 2.11  | 0.16 | 1.00 | -2.98 | -7.72  | 1.76  | 0.22 | 1.00 | Yes |
| Bacteria | Firmicutes | Bacilli    | Turicibacterales | Turicibacteraceae      | Turicibacter                | 2.23   | 0.40 | 0.87   | -1.69  | 3.43  | 0.51 | 1.00 | 0.02  | -1.64  | 1.68  | 0.98 | 1.00 | No  |
| Bacteria | Firmicutes | Clostridia |                  | [Acidaminobacteraceae] | Fusibacter                  | 0.30%  | -    | 3.07   | -15.24 | 21.37 | 0.74 | 1.00 | -2.58 | -14.41 | 9.25  | 0.67 | 1.00 | Yes |
| Bacteria | Firmicutes | Clostridia | Clostridiales    | [Mogibacteriaceae]     | Anaerovorax                 | 19.24% | -    | 1.75   | -0.78  | 4.28  | 0.18 | 1.00 | 0.51  | -1.13  | 2.15  | 0.54 | 1.00 | Yes |
| Bacteria | Firmicutes | Clostridia | Clostridiales    | [Mogibacteriaceae]     | Mogibacterium               | 0.47   | 0.35 | 0.02   | -2.88  | 2.91  | 0.99 | 1.00 | 0.55  | -1.32  | 2.42  | 0.56 | 1.00 | No  |
| Bacteria | Firmicutes | Clostridia | Clostridiales    | [Mogibacteriaceae]     |                             | 1.03   | 0.27 | 0.00   | -3.78  | 3.78  | 1.00 | 1.00 | 0.87  | -1.57  | 3.31  | 0.48 | 1.00 | No  |
| Bacteria | Firmicutes | Clostridia | Clostridiales    | [Tissierellaceae]      | Anaerococcus                | 20.24% | -    | 2.81   | 0.16   | 5.47  | 0.04 | 0.99 | 2.39  | 0.68   | 4.10  | 0.01 | 1.00 | Yes |
| Bacteria | Firmicutes | Clostridia | Clostridiales    | [Tissierellaceae]      | Finegoldia                  | 0.10   | 0.18 | -0.46  | -2.98  | 2.05  | 0.72 | 1.00 | 1.01  | -0.61  | 2.63  | 0.22 | 1.00 | No  |
| Bacteria | Firmicutes | Clostridia | Clostridiales    | [Tissierellaceae]      | Gallicola                   | 5.18%  | -    | -1.11  | -6.63  | 4.41  | 0.69 | 1.00 | 0.65  | -2.91  | 4.22  | 0.72 | 1.00 | Yes |
| Bacteria | Firmicutes | Clostridia | Clostridiales    | [Tissierellaceae]      | GW-34                       | 1.69%  | -    | 0.66   | -3.89  | 5.20  | 0.78 | 1.00 | 1.86  | -1.08  | 4.79  | 0.21 | 1.00 | Yes |
| Bacteria | Firmicutes | Clostridia | Clostridiales    | [Tissierellaceae]      | Helcococcus                 | 0.70%  | -    | -2.58  | -10.36 | 5.19  | 0.51 | 1.00 | 1.19  | -3.84  | 6.21  | 0.64 | 1.00 | Yes |
| Bacteria | Firmicutes | Clostridia | Clostridiales    | [Tissierellaceae]      | Other                       | 0.40%  | -    | -5.45  | -17.47 | 6.56  | 0.37 | 1.00 | -0.44 | -8.21  | 7.32  | 0.91 | 1.00 | Yes |
| Bacteria | Firmicutes | Clostridia | Clostridiales    | [Tissierellaceae]      | Parvimonas                  | 0.25   | 0.28 | -0.36  | -16.31 | 15.60 | 0.97 | 1.00 | 5.20  | -5.11  | 15.51 | 0.32 | 1.00 | No  |
| Bacteria | Firmicutes | Clostridia | Clostridiales    | [Tissierellaceae]      | Peptoniphilus               | 0.15   | 0.24 | 1.22   | -2.42  | 4.87  | 0.51 | 1.00 | 0.78  | -1.57  | 3.14  | 0.51 | 1.00 | No  |
| Bacteria | Firmicutes | Clostridia | Clostridiales    | [Tissierellaceae]      | pH2                         | 11.76% | -    | 3.25   | -1.00  | 7.50  | 0.13 | 1.00 | 0.87  | -1.88  | 3.62  | 0.54 | 1.00 | Yes |
| Bacteria | Firmicutes | Clostridia | Clostridiales    | [Tissierellaceae]      | Sedimentibacter             | 0.30%  | -    | 1.71   | -1.40  | 4.82  | 0.28 | 1.00 | 1.31  | -0.70  | 3.31  | 0.20 | 1.00 | Yes |
| Bacteria | Firmicutes | Clostridia | Clostridiales    | [Tissierellaceae]      | Tissierella_Soehngenia      | 2.09%  | -    | 8.76   | -9.62  | 27.13 | 0.35 | 1.00 | 4.71  | -7.16  | 16.59 | 0.44 | 1.00 | Yes |
| Bacteria | Firmicutes | Clostridia | Clostridiales    | [Tissierellaceae]      | WAL_1855D                   | 0.25   | 0.38 | 1.23   | -5.79  | 8.25  | 0.73 | 1.00 | 1.37  | -3.16  | 5.90  | 0.55 | 1.00 | No  |
| Bacteria | Firmicutes | Clostridia | Clostridiales    | [Tissierellaceae]      |                             | 4.59%  | -    | 0.77   | -2.00  | 3.53  | 0.59 | 1.00 | 0.92  | -0.86  | 2.71  | 0.31 | 1.00 | Yes |
| Bacteria | Firmicutes | Clostridia | Clostridiales    | [Tissierellaceae]      |                             | 17.35% | -    | -4.58  | -9.41  | 0.25  | 0.06 | 0.99 | -2.29 | -5.41  | 0.84  | 0.15 | 1.00 | Yes |
| Bacteria | Firmicutes | Clostridia | Clostridiales    | Christensenellaceae    | Christensenella             | 0.12   | 0.20 | 0.53   | -4.59  | 5.64  | 0.84 | 1.00 | 1.64  | -1.67  | 4.94  | 0.33 | 1.00 | No  |
| Bacteria | Firmicutes | Clostridia | Clostridiales    | Christensenellaceae    |                             | 0.45   | 0.45 | 0.80   | -1.50  | 3.10  | 0.50 | 1.00 | 0.30  | -1.19  | 1.79  | 0.69 | 1.00 | No  |
| Bacteria | Firmicutes | Clostridia | Clostridiales    | Clostridiaceae         | Alkaliphilus                | 0.70%  | -    | -7.64  | -19.69 | 4.41  | 0.21 | 1.00 | -0.50 | -8.29  | 7.30  | 0.90 | 1.00 | Yes |
| Bacteria | Firmicutes | Clostridia | Clostridiales    | Clostridiaceae         | Caloramator                 | 0.40%  | -    | -3.40  | -19.43 | 12.64 | 0.68 | 1.00 | -2.15 | -12.52 | 8.21  | 0.68 | 1.00 | Yes |
| Bacteria | Firmicutes | Clostridia | Clostridiales    | Clostridiaceae         | Candidatus Arthromitus      | 2.79%  | -    | -0.72  | -6.85  | 5.41  | 0.82 | 1.00 | -2.20 | -6.16  | 1.76  | 0.28 | 1.00 | Yes |
| Bacteria | Firmicutes | Clostridia | Clostridiales    | Clostridiaceae         | Clostridiisalibacter        | 0.10%  | -    | -14.64 | -46.27 | 16.98 | 0.36 | 1.00 | -4.95 | -25.39 | 15.50 | 0.63 | 1.00 | Yes |
| Bacteria | Firmicutes | Clostridia | Clostridiales    | Clostridiaceae         | Clostridium                 | 1.80   | 0.51 | 0.07   | -1.94  | 2.09  | 0.94 | 1.00 | 0.40  | -0.90  | 1.70  | 0.55 | 1.00 | No  |
| Bacteria | Firmicutes | Clostridia | Clostridiales    | Clostridiaceae         | Other                       | 1.08   | 0.40 | -0.31  | -2.89  | 2.26  | 0.81 | 1.00 | -0.02 | -1.68  | 1.65  | 0.99 | 1.00 | No  |
| Bacteria | Firmicutes | Clostridia | Clostridiales    | Clostridiaceae         | Proteiniclasticum           | 0.90%  | -    | -4.84  | -15.51 | 5.83  | 0.37 | 1.00 | -3.33 | -10.23 | 3.56  | 0.34 | 1.00 | Yes |
| Bacteria | Firmicutes | Clostridia | Clostridiales    | Clostridiaceae         | Sarcina                     | 4.99%  | -    | -0.39  | -5.04  | 4.25  | 0.87 | 1.00 | -0.99 | -3.99  | 2.02  | 0.52 | 1.00 | Yes |
| Bacteria | Firmicutes | Clostridia | Clostridiales    | Clostridiaceae         | SMB53                       | 1.08   | 0.35 | 1.49   | -1.40  | 4.39  | 0.31 | 1.00 | 1.69  | -0.18  | 3.55  | 0.08 | 1.00 | No  |
| Bacteria | Firmicutes | Clostridia | Clostridiales    | Clostridiaceae         | Tindallia_Anoxynatronum     | 0.20%  | -    | 5.47   | -16.85 | 27.79 | 0.63 | 1.00 | -1.50 | -15.93 | 12.93 | 0.84 | 1.00 | Yes |
| Bacteria | Firmicutes | Clostridia | Clostridiales    | Clostridiaceae         |                             | 3.15   | 0.32 | 3.04   | -0.19  | 6.27  | 0.07 | 0.99 | 1.53  | -0.56  | 3.62  | 0.15 | 1.00 | No  |
| Bacteria | Firmicutes | Clostridia | Clostridiales    | Dehalobacteriaceae     | Dehalobacterium             | 0.13   | 0.26 | 1.74   | -2.17  | 5.64  | 0.38 | 1.00 | 1.68  | -0.85  | 4.20  | 0.19 | 1.00 | No  |
| Bacteria | Firmicutes | Clostridia | Clostridiales    | Dehalobacteriaceae     |                             | 2.59%  | -    | -0.84  | -7.18  | 5.51  | 0.80 | 1.00 | -1.05 | -5.14  | 3.05  | 0.62 | 1.00 | Yes |
| Bacteria | Firmicutes | Clostridia | Clostridiales    | EtOH8                  |                             | 2.39%  | -    | 2.80   | -3.81  | 9.41  | 0.41 | 1.00 | -1.14 | -5.41  | 3.13  | 0.60 | 1.00 | Yes |
| Bacteria | Firmicutes | Clostridia | Clostridiales    | Eubacteriaceae         | Anaerofustis                | 0.12   | 0.20 | 1.21   | -4.00  | 6.43  | 0.65 | 1.00 | 0.05  | -3.32  | 3.42  | 0.98 | 1.00 | No  |
| Bacteria | Firmicutes | Clostridia | Clostridiales    | Eubacteriaceae         | Pseudoramibacter_Eubacteriu | 0.49   | 0.48 | 1.27   | -1.14  | 3.68  | 0.30 | 1.00 | -0.60 | -2.15  | 0.96  | 0.45 | 1.00 | No  |
| Bacteria | Firmicutes | Clostridia | Clostridiales    | Gracilibacteraceae     | Lutispora                   | 0.10%  | -    | 31.11  | -0.47  | 62.69 | 0.05 | 0.99 | 16.99 | -3.43  | 37.41 | 0.10 | 1.00 | Yes |
| Bacteria | Firmicutes | Clostridia | Clostridiales    | Lachnospiraceae        | [Ruminococcus]              | 2.69   | 0.26 | -2.52  | -6.56  | 1.51  | 0.22 | 1.00 | -1.56 | -4.17  | 1.05  | 0.24 | 1.00 | No  |
| Bacteria | Firmicutes | Clostridia | Clostridiales    | Lachnospiraceae        | Anaerostipes                | 1.01   | 0.44 | -1.92  | -4.27  | 0.43  | 0.11 | 1.00 | -1.27 | -2.79  | 0.25  | 0.10 | 1.00 | No  |
| Bacteria | Firmicutes | Clostridia | Clostridiales    | Lachnospiraceae        | Blautia†                    | 3.34   | 0.31 | -3.04  | -6.61  | 0.53  | 0.10 | 1.00 | -0.48 | -2.79  | 1.83  | 0.68 | 1.00 | No  |
| Bacteria | Firmicutes | Clostridia | Clostridiales    | Lachnospiraceae        | Butyrivibrio                | 2.39%  | -    | -3.88  | -10.42 | 2.67  | 0.25 | 1.00 | -2.29 | -6.52  | 1.94  | 0.29 | 1.00 | Yes |
| Bacteria | Firmicutes | Clostridia | Clostridiales    | Lachnospiraceae        | Catonella                   | 0.90%  | -    | 4.21   | -6.42  | 14.84 | 0.44 | 1.00 | 3.36  | -3.51  | 10.23 | 0.34 | 1.00 | Yes |
| Bacteria | Firmicutes | Clostridia | Clostridiales    | Lachnospiraceae        | Clostridium                 | 0.30%  | -    | 5.80   | -12.58 | 24.19 | 0.54 | 1.00 | 3.44  | -8.44  | 15.32 | 0.57 | 1.00 | Yes |
| Bacteria | Firmicutes | Clostridia | Clostridiales    | Lachnospiraceae        | Coproccocus†                | 3.03   | 0.32 | -3.37  | -6.64  | -0.10 | 0.04 | 0.99 | -1.74 | -3.86  | 0.37  | 0.11 | 1.00 | No  |
| Bacteria | Firmicutes | Clostridia | Clostridiales    | Lachnospiraceae        | Dorea                       | 2.39   | 0.24 | -1.64  | -5.74  | 2.46  | 0.43 | 1.00 | -1.69 | -4.34  | 0.96  | 0.21 | 1.00 | No  |
| Bacteria | Firmicutes | Clostridia | Clostridiales    | Lachnospiraceae        | Epulopiscium                | 0.44   | 0.43 | -0.90  | -3.23  | 1.42  | 0.45 | 1.00 | -0.70 | -2.21  | 0.80  | 0.36 | 1.00 | No  |
| Bacteria | Firmicutes | Clostridia | Clostridiales    | Lachnospiraceae        | Lachnobacterium             | 1.20%  | -    | 2.14   | -7.04  | 11.33 | 0.65 | 1.00 | -1.76 | -7.70  | 4.17  | 0.56 | 1.00 | Yes |
| Bacteria | Firmicutes | Clostridia | Clostridiales    | Lachnospiraceae        | Lachnospira                 | 1.66   | 0.50 | -0.02  | -2.05  | 2.01  | 0.98 | 1.00 | -1.13 | -2.44  | 0.18  | 0.09 | 1.00 | No  |
| Bacteria | Firmicutes | Clostridia | Clostridiales    | Lachnospiraceae        | Moryella                    | 1.69%  | -    | 5.08   | -2.68  | 12.84 | 0.20 | 1.00 | 4.67  | -0.34  | 9.68  | 0.07 | 1.00 | Yes |
| Bacteria | Firmicutes | Clostridia | Clostridiales    | Lachnospiraceae        | Oribacterium                | 16.05% | -    | 1.56   | -1.15  | 4.28  | 0.26 | 1.00 | 1.30  | -0.45  | 3.05  | 0.15 | 1.00 | Yes |
| Bacteria | Firmicutes | Clostridia | Clostridiales    | Lachnospiraceae        | Other                       | 1.66   | 0.24 | -2.83  | -7.02  | 1.35  | 0.18 | 1.00 | -0.33 | -3.03  | 2.38  | 0.81 | 1.00 | No  |

|          |                  |                 |                        |                           |                       |        |      |        |        |       |      |      |        |        |       |      |      |     |
|----------|------------------|-----------------|------------------------|---------------------------|-----------------------|--------|------|--------|--------|-------|------|------|--------|--------|-------|------|------|-----|
| Bacteria | Firmicutes       | Clostridia      | Clostridiales          | Lachnospiraceae           | Pseudobutyrvibrio     | 0.70%  | -    | -0.76  | -12.92 | 11.40 | 0.90 | 1.00 | -2.36  | -10.22 | 5.49  | 0.56 | 1.00 | Yes |
| Bacteria | Firmicutes       | Clostridia      | Clostridiales          | Lachnospiraceae           | Roseburia             | 0.55   | 0.36 | 0.25   | -2.53  | 3.02  | 0.86 | 1.00 | -1.31  | -3.10  | 0.49  | 0.15 | 1.00 | No  |
| Bacteria | Firmicutes       | Clostridia      | Clostridiales          | Lachnospiraceae           | Shuttleworthia        | 0.80%  | -    | -4.75  | -16.03 | 6.53  | 0.41 | 1.00 | 1.09   | -6.20  | 8.38  | 0.77 | 1.00 | Yes |
| Bacteria | Firmicutes       | Clostridia      | Clostridiales          | Lachnospiraceae           |                       | 3.05   | 0.22 | -1.64  | -6.27  | 2.99  | 0.49 | 1.00 | -0.32  | -3.31  | 2.67  | 0.83 | 1.00 | No  |
| Bacteria | Firmicutes       | Clostridia      | Clostridiales          | Other                     | Other                 | 2.40   | 0.34 | 1.41   | -1.59  | 4.41  | 0.36 | 1.00 | 2.16   | 0.23   | 4.10  | 0.03 | 1.00 | No  |
| Bacteria | Firmicutes       | Clostridia      | Clostridiales          | Peptococcaceae            | Desulfurispora        | 0.40%  | -    | 2.45   | -13.42 | 18.32 | 0.76 | 1.00 | -3.84  | -14.09 | 6.41  | 0.46 | 1.00 | Yes |
| Bacteria | Firmicutes       | Clostridia      | Clostridiales          | Peptococcaceae            | Other                 | 0.20%  | -    | -13.06 | -35.54 | 9.41  | 0.25 | 1.00 | -11.25 | -25.76 | 3.27  | 0.13 | 1.00 | Yes |
| Bacteria | Firmicutes       | Clostridia      | Clostridiales          | Peptococcaceae            | Peptococcus           | 0.60   | 0.61 | 0.54   | -1.20  | 2.28  | 0.54 | 1.00 | 0.11   | -1.02  | 1.24  | 0.85 | 1.00 | No  |
| Bacteria | Firmicutes       | Clostridia      | Clostridiales          | Peptococcaceae            | rc4-4                 | 3.09%  | -    | 2.46   | -3.36  | 8.28  | 0.41 | 1.00 | -0.56  | -4.32  | 3.21  | 0.77 | 1.00 | Yes |
| Bacteria | Firmicutes       | Clostridia      | Clostridiales          | Peptococcaceae            | Sporotomaculum        | 1.20%  | -    | 1.88   | -7.36  | 11.13 | 0.69 | 1.00 | -0.85  | -6.82  | 5.12  | 0.78 | 1.00 | Yes |
| Bacteria | Firmicutes       | Clostridia      | Clostridiales          | Peptococcaceae            |                       | 0.12   | 0.21 | -0.52  | -5.46  | 4.42  | 0.84 | 1.00 | 0.89   | -2.30  | 4.09  | 0.58 | 1.00 | No  |
| Bacteria | Firmicutes       | Clostridia      | Clostridiales          | Peptostreptococcaceae     | Filifactor            | 1.30%  | -    | 2.99   | -5.91  | 11.90 | 0.51 | 1.00 | 1.09   | -4.67  | 6.84  | 0.71 | 1.00 | Yes |
| Bacteria | Firmicutes       | Clostridia      | Clostridiales          | Peptostreptococcaceae     | Other                 | 21.44% | -    | 0.50   | -1.97  | 2.98  | 0.69 | 1.00 | 0.09   | -1.51  | 1.69  | 0.91 | 1.00 | Yes |
| Bacteria | Firmicutes       | Clostridia      | Clostridiales          | Peptostreptococcaceae     | Peptostreptococcus    | 0.30   | 0.36 | 2.88   | 0.04   | 5.73  | 0.05 | 0.99 | 1.84   | 0.00   | 3.68  | 0.05 | 1.00 | No  |
| Bacteria | Firmicutes       | Clostridia      | Clostridiales          | Peptostreptococcaceae     |                       | 1.34   | 0.42 | -0.04  | -2.55  | 2.46  | 0.97 | 1.00 | 0.13   | -1.49  | 1.75  | 0.87 | 1.00 | No  |
| Bacteria | Firmicutes       | Clostridia      | Clostridiales          | Ruminococcaceae           | Anaerotruncus         | 17.85% | -    | -0.43  | -3.07  | 2.22  | 0.75 | 1.00 | -0.94  | -2.65  | 0.77  | 0.28 | 1.00 | Yes |
| Bacteria | Firmicutes       | Clostridia      | Clostridiales          | Ruminococcaceae           | Ethanoligenens        | 0.30%  | -    | -10.37 | -28.73 | 7.98  | 0.27 | 1.00 | -5.16  | -17.03 | 6.70  | 0.39 | 1.00 | Yes |
| Bacteria | Firmicutes       | Clostridia      | Clostridiales          | Ruminococcaceae           | Faecalibacterium      | 2.31   | 0.45 | 0.10   | -2.12  | 2.33  | 0.93 | 1.00 | -0.80  | -2.23  | 0.64  | 0.28 | 1.00 | No  |
| Bacteria | Firmicutes       | Clostridia      | Clostridiales          | Ruminococcaceae           | Oscillospira          | 1.45   | 0.36 | 0.47   | -2.51  | 3.46  | 0.76 | 1.00 | -0.57  | -2.50  | 1.36  | 0.56 | 1.00 | No  |
| Bacteria | Firmicutes       | Clostridia      | Clostridiales          | Ruminococcaceae           | Other                 | 0.45   | 0.53 | -2.31  | -4.31  | -0.32 | 0.02 | 0.99 | -1.13  | -2.42  | 0.16  | 0.09 | 1.00 | No  |
| Bacteria | Firmicutes       | Clostridia      | Clostridiales          | Ruminococcaceae           | Ruminococcus          | 2.49   | 0.37 | -2.09  | -4.83  | 0.66  | 0.14 | 1.00 | -1.69  | -3.47  | 0.08  | 0.06 | 1.00 | No  |
| Bacteria | Firmicutes       | Clostridia      | Clostridiales          | Ruminococcaceae           |                       | 3.02   | 0.36 | 0.17   | -2.62  | 2.95  | 0.90 | 1.00 | -0.23  | -2.03  | 1.57  | 0.80 | 1.00 | No  |
| Bacteria | Firmicutes       | Clostridia      | Clostridiales          | Veillonellaceae           | Acidaminococcus       | 7.78%  | -    | 0.14   | -3.66  | 3.95  | 0.94 | 1.00 | 0.87   | -1.59  | 3.33  | 0.49 | 1.00 | Yes |
| Bacteria | Firmicutes       | Clostridia      | Clostridiales          | Veillonellaceae           | Anaerovibrio          | 0.40%  | -    | -4.69  | -20.67 | 11.28 | 0.56 | 1.00 | -3.03  | -13.36 | 7.29  | 0.56 | 1.00 | Yes |
| Bacteria | Firmicutes       | Clostridia      | Clostridiales          | Veillonellaceae           | Dialister             | 12.86% | -    | -0.53  | -3.54  | 2.48  | 0.73 | 1.00 | 0.00   | -1.95  | 1.94  | 1.00 | 1.00 | Yes |
| Bacteria | Firmicutes       | Clostridia      | Clostridiales          | Veillonellaceae           | Megamonas             | 0.71   | 0.57 | 1.69   | -0.07  | 3.45  | 0.06 | 0.99 | 0.70   | -0.44  | 1.84  | 0.23 | 1.00 | No  |
| Bacteria | Firmicutes       | Clostridia      | Clostridiales          | Veillonellaceae           | Megasphaera           | 0.25   | 0.41 | 1.75   | -0.77  | 4.28  | 0.17 | 1.00 | 0.68   | -0.95  | 2.32  | 0.41 | 1.00 | No  |
| Bacteria | Firmicutes       | Clostridia      | Clostridiales          | Veillonellaceae           | Mitsuokella           | 13.06% | -    | 1.37   | -1.66  | 4.39  | 0.38 | 1.00 | 0.32   | -1.64  | 2.27  | 0.75 | 1.00 | Yes |
| Bacteria | Firmicutes       | Clostridia      | Clostridiales          | Veillonellaceae           | Other                 | 3.09%  | -    | 0.45   | -5.35  | 6.26  | 0.88 | 1.00 | 1.72   | -2.03  | 5.46  | 0.37 | 1.00 | Yes |
| Bacteria | Firmicutes       | Clostridia      | Clostridiales          | Veillonellaceae           | Phascolarctobacterium | 0.51   | 0.48 | 1.73   | -0.36  | 3.83  | 0.10 | 1.00 | -0.07  | -1.43  | 1.28  | 0.91 | 1.00 | No  |
| Bacteria | Firmicutes       | Clostridia      | Clostridiales          | Veillonellaceae           | Selenomonas           | 0.50%  | -    | 0.72   | -13.56 | 15.00 | 0.92 | 1.00 | -7.11  | -16.33 | 2.11  | 0.13 | 1.00 | Yes |
| Bacteria | Firmicutes       | Clostridia      | Clostridiales          | Veillonellaceae           | Succiniclasticum      | 0.30%  | -    | -11.57 | -29.95 | 6.81  | 0.22 | 1.00 | -5.33  | -17.21 | 6.56  | 0.38 | 1.00 | Yes |
| Bacteria | Firmicutes       | Clostridia      | Clostridiales          | Veillonellaceae           | Veillonella*          | 0.42   | 0.46 | 1.08   | -1.16  | 3.31  | 0.34 | 1.00 | 0.37   | -1.07  | 1.81  | 0.62 | 1.00 | No  |
| Bacteria | Firmicutes       | Clostridia      | Clostridiales          | Veillonellaceae           |                       | 8.97%  | -    | 2.01   | -1.48  | 5.51  | 0.26 | 1.00 | 0.74   | -1.52  | 3.00  | 0.52 | 1.00 | Yes |
| Bacteria | Firmicutes       | Clostridia      | Clostridiales          |                           |                       | 3.38   | 0.24 | 0.79   | -3.42  | 5.00  | 0.71 | 1.00 | 1.28   | -1.44  | 4.00  | 0.36 | 1.00 | No  |
| Bacteria | Firmicutes       | Clostridia      | MBA08                  |                           |                       | 0.30%  | -    | 3.11   | -15.43 | 21.66 | 0.74 | 1.00 | 1.25   | -10.74 | 13.23 | 0.84 | 1.00 | Yes |
| Bacteria | Firmicutes       | Clostridia      | Natranaerobiales       | ML1228J-1                 |                       | 0.20%  | -    | -6.68  | -29.07 | 15.71 | 0.56 | 1.00 | -1.53  | -16.00 | 12.94 | 0.84 | 1.00 | Yes |
| Bacteria | Firmicutes       | Clostridia      | OPB54                  |                           |                       | 0.20%  | -    | 7.50   | -15.01 | 30.01 | 0.51 | 1.00 | 6.92   | -7.62  | 21.47 | 0.35 | 1.00 | Yes |
| Bacteria | Firmicutes       | Clostridia      | Other                  | Other                     | Other                 | 1.69%  | -    | 4.71   | -3.08  | 12.51 | 0.24 | 1.00 | 1.41   | -3.63  | 6.45  | 0.58 | 1.00 | Yes |
| Bacteria | Firmicutes       | Clostridia      | Thermoanaerobacterales | Caldicellulosiruptoraceae | Caldicellulosiruptor  | 0.50%  | -    | 14.47  | 0.13   | 28.80 | 0.05 | 0.99 | 11.07  | 1.81   | 20.32 | 0.02 | 1.00 | Yes |
| Bacteria | Firmicutes       | Clostridia      | Thermoanaerobacterales | Thermodesulfobiaceae      | Coprothermobacter     | 0.30%  | -    | -2.47  | -20.81 | 15.87 | 0.79 | 1.00 | -0.55  | -12.41 | 11.30 | 0.93 | 1.00 | Yes |
| Bacteria | Firmicutes       | Clostridia      |                        |                           |                       | 1.10%  | -    | 0.64   | -8.97  | 10.25 | 0.90 | 1.00 | -1.29  | -7.50  | 4.92  | 0.68 | 1.00 | Yes |
| Bacteria | Firmicutes       | Erysipelotrichi | Erysipelotrichales     | Erysipelotrichaceae       | [Eubacterium]         | 2.17   | 0.58 | -2.38  | -4.11  | -0.65 | 0.01 | 0.99 | -0.92  | -2.04  | 0.20  | 0.11 | 1.00 | No  |
| Bacteria | Firmicutes       | Erysipelotrichi | Erysipelotrichales     | Erysipelotrichaceae       | Allobaculum           | 17.55% | -    | 0.80   | -1.87  | 3.47  | 0.56 | 1.00 | -0.36  | -2.08  | 1.37  | 0.69 | 1.00 | Yes |
| Bacteria | Firmicutes       | Erysipelotrichi | Erysipelotrichales     | Erysipelotrichaceae       | Bulleidia             | 0.65   | 0.41 | 1.21   | -1.25  | 3.66  | 0.34 | 1.00 | 1.07   | -0.52  | 2.66  | 0.19 | 1.00 | No  |
| Bacteria | Firmicutes       | Erysipelotrichi | Erysipelotrichales     | Erysipelotrichaceae       | Catenibacterium       | 0.95   | 0.85 | -0.10  | -1.37  | 1.17  | 0.88 | 1.00 | 0.33   | -0.49  | 1.15  | 0.43 | 1.00 | No  |
| Bacteria | Firmicutes       | Erysipelotrichi | Erysipelotrichales     | Erysipelotrichaceae       | cc_115                | 4.69%  | -    | -0.06  | -4.83  | 4.71  | 0.98 | 1.00 | 1.51   | -1.58  | 4.59  | 0.34 | 1.00 | Yes |
| Bacteria | Firmicutes       | Erysipelotrichi | Erysipelotrichales     | Erysipelotrichaceae       | Coprobacillus         | 0.40   | 0.43 | 1.43   | -1.05  | 3.90  | 0.26 | 1.00 | -0.09  | -1.69  | 1.50  | 0.91 | 1.00 | No  |
| Bacteria | Firmicutes       | Erysipelotrichi | Erysipelotrichales     | Erysipelotrichaceae       | Erysipelothrix        | 3.39%  | -    | -2.00  | -7.60  | 3.60  | 0.48 | 1.00 | -0.56  | -4.18  | 3.06  | 0.76 | 1.00 | Yes |
| Bacteria | Firmicutes       | Erysipelotrichi | Erysipelotrichales     | Erysipelotrichaceae       | Holdemania            | 0.34   | 0.34 | -0.59  | -3.68  | 2.50  | 0.71 | 1.00 | -0.61  | -2.61  | 1.39  | 0.55 | 1.00 | No  |
| Bacteria | Firmicutes       | Erysipelotrichi | Erysipelotrichales     | Erysipelotrichaceae       | Other                 | 3.39%  | -    | 4.85   | -0.68  | 10.38 | 0.09 | 1.00 | 0.76   | -2.82  | 4.34  | 0.68 | 1.00 | Yes |
| Bacteria | Firmicutes       | Erysipelotrichi | Erysipelotrichales     | Erysipelotrichaceae       | p-75-a5               | 11.17% | -    | -0.74  | -3.92  | 2.45  | 0.65 | 1.00 | -0.60  | -2.66  | 1.45  | 0.57 | 1.00 | Yes |
| Bacteria | Firmicutes       | Erysipelotrichi | Erysipelotrichales     | Erysipelotrichaceae       | PSB-M-3               | 0.70%  | -    | 1.53   | -10.47 | 13.53 | 0.80 | 1.00 | 2.49   | -5.26  | 10.25 | 0.53 | 1.00 | Yes |
| Bacteria | Firmicutes       | Erysipelotrichi | Erysipelotrichales     | Erysipelotrichaceae       | RFN20                 | 1.79%  | -    | 2.73   | -4.85  | 10.30 | 0.48 | 1.00 | -1.25  | -6.15  | 3.65  | 0.62 | 1.00 | Yes |
| Bacteria | Firmicutes       | Erysipelotrichi | Erysipelotrichales     | Erysipelotrichaceae       | Sharpea               | 6.28%  | -    | 4.55   | 0.43   | 8.68  | 0.03 | 0.99 | 3.42   | 0.76   | 6.08  | 0.01 | 1.00 | Yes |
| Bacteria | Firmicutes       | Erysipelotrichi | Erysipelotrichales     | Erysipelotrichaceae       |                       | 2.83   | 0.38 | -0.67  | -3.32  | 1.98  | 0.62 | 1.00 | -1.72  | -3.43  | -0.01 | 0.05 | 1.00 | No  |
| Bacteria | Firmicutes       | Other           | Other                  | Other                     |                       | 0.20%  | -    | -5.59  | -28.02 | 16.84 | 0.62 | 1.00 | -4.68  | -19.18 | 9.81  | 0.53 | 1.00 | Yes |
| Bacteria | Fusobacteria     | Fusobacteriia   | Fusobacteriales        | Fusobacteriaceae          | Cetobacterium         | 15.55% | -    | 0.93   | -1.85  | 3.72  | 0.51 | 1.00 | 1.09   | -0.71  | 2.89  | 0.24 | 1.00 | Yes |
| Bacteria | Fusobacteria     | Fusobacteriia   | Fusobacteriales        | Fusobacteriaceae          | Fusobacterium*        | 0.40   | 0.59 | 2.11   | 0.29   | 3.94  | 0.02 | 0.99 | 0.15   | -1.03  | 1.33  | 0.80 | 1.00 | No  |
| Bacteria | Fusobacteria     | Fusobacteriia   | Fusobacteriales        | Fusobacteriaceae          | Psychrilyobacter      | 0.30%  | -    | -8.77  | -27.13 | 9.59  | 0.35 | 1.00 | -8.80  | -20.66 | 3.05  | 0.15 | 1.00 | Yes |
| Bacteria | Fusobacteria     | Fusobacteriia   | Fusobacteriales        | Fusobacteriaceae          | u114                  | 0.20%  | -    | 10.30  | -12.09 | 32.69 | 0.37 | 1.00 | 8.34   | -6.12  | 22.81 | 0.26 | 1.00 | Yes |
| Bacteria | Fusobacteria     | Fusobacteriia   | Fusobacteriales        | Fusobacteriaceae          |                       | 0.80%  | -    | 9.09   | -2.14  | 20.32 | 0.11 | 1.00 | 3.26   | -4.01  | 10.52 | 0.38 | 1.00 | Yes |
| Bacteria | Fusobacteria     | Fusobacteriia   | Fusobacteriales        | Leptotrichiaceae          | Leptotrichia          | 3.59%  | -    | 3.23   | -2.17  | 8.63  | 0.24 | 1.00 | -0.25  | -3.74  | 2.25  | 0.89 | 1.00 | Yes |
| Bacteria | Fusobacteria     | Fusobacteriia   | Fusobacteriales        | Leptotrichiaceae          | Sneathia              | 1.69%  | -    | -6.82  | -14.59 | 0.95  | 0.09 | 1.00 | -2.86  | -7.89  | 2.16  | 0.26 | 1.00 | Yes |
| Bacteria | Fusobacteria     | Fusobacteriia   | Fusobacteriales        |                           |                       | 0.10%  | -    | -29.97 | -61.54 | 1.61  | 0.06 | 0.99 | -26.10 | -46.48 | -5.72 | 0.01 | 1.00 | Yes |
| Bacteria | Gemmatimonadetes | Gemm-1          |                        |                           |                       | 3.99%  | -    | 1.77   | -3.36  | 6.90  | 0.50 | 1.00 | 0.96   | -2.35  | 4.28  | 0.57 | 1.00 | Yes |
| Bacteria | Gemmatimonadetes | Gemm-2          |                        |                           |                       | 0.20%  | -    | -13.13 | -35.72 | 9.45  | 0.25 | 1.00 | -3.35  | -17.96 | 11.25 | 0.65 | 1.00 | Yes |
| Bacteria | Gemmatimonadetes | Gemm-3          |                        |                           |                       | 1.40%  | -    | -3.66  | -12.24 | 4.93  | 0.40 | 1.00 | -2.99  | -8.53  | 2.56  | 0.29 | 1.00 | Yes |

|          |                  |                     |                  |                           |                     |        |   |        |        |       |      |      |        |        |       |      |      |     |
|----------|------------------|---------------------|------------------|---------------------------|---------------------|--------|---|--------|--------|-------|------|------|--------|--------|-------|------|------|-----|
| Bacteria | Gemmatimonadetes | Gemm-4              |                  |                           |                     | 0.20%  | - | 2.11   | -20.43 | 24.65 | 0.85 | 1.00 | 6.00   | -8.56  | 20.56 | 0.42 | 1.00 | Yes |
| Bacteria | Gemmatimonadetes | Gemm-5              |                  |                           |                     | 1.30%  | - | -3.21  | -12.12 | 5.70  | 0.48 | 1.00 | -1.81  | -7.57  | 3.94  | 0.54 | 1.00 | Yes |
| Bacteria | Gemmatimonadetes | Gemmatimonadetes    | C114             |                           |                     | 0.40%  | - | -2.23  | -18.23 | 13.76 | 0.78 | 1.00 | -2.47  | -12.80 | 7.86  | 0.64 | 1.00 | Yes |
| Bacteria | Gemmatimonadetes | Gemmatimonadetes    | Ellin5290        |                           |                     | 0.50%  | - | -2.50  | -16.82 | 11.82 | 0.73 | 1.00 | -8.56  | -17.80 | 0.68  | 0.07 | 1.00 | Yes |
| Bacteria | Gemmatimonadetes | Gemmatimonadetes    | Gemmatimonadales | Ellin5301                 |                     | 0.40%  | - | -2.03  | -17.94 | 13.89 | 0.80 | 1.00 | -1.00  | -11.28 | 9.28  | 0.85 | 1.00 | Yes |
| Bacteria | Gemmatimonadetes | Gemmatimonadetes    | Gemmatimonadales | Gemmatimonadaceae         | Gemmatimonas        | 0.20%  | - | 5.74   | -16.73 | 28.21 | 0.62 | 1.00 | 0.41   | -14.12 | 14.93 | 0.96 | 1.00 | Yes |
| Bacteria | Gemmatimonadetes | Gemmatimonadetes    | Gemmatimonadales | Other                     | Other               | 0.30%  | - | -2.87  | -21.16 | 15.43 | 0.76 | 1.00 | -2.36  | -14.18 | 9.47  | 0.70 | 1.00 | Yes |
| Bacteria | Gemmatimonadetes | Gemmatimonadetes    | Gemmatimonadales |                           |                     | 0.60%  | - | 0.14   | -12.86 | 13.14 | 0.98 | 1.00 | 2.49   | -5.91  | 10.89 | 0.56 | 1.00 | Yes |
| Bacteria | Gemmatimonadetes | Gemmatimonadetes    | KD8-87           |                           |                     | 0.60%  | - | 6.18   | -6.78  | 19.14 | 0.35 | 1.00 | 0.42   | -7.96  | 8.81  | 0.92 | 1.00 | Yes |
| Bacteria | Gemmatimonadetes | Gemmatimonadetes    | N1423WL          |                           |                     | 0.20%  | - | -22.69 | -45.02 | -0.36 | 0.05 | 0.99 | -18.88 | -33.29 | -4.47 | 0.01 | 1.00 | Yes |
| Bacteria | Gemmatimonadetes | Gemmatimonadetes    |                  |                           |                     | 2.79%  | - | 1.90   | -4.16  | 7.96  | 0.54 | 1.00 | -3.06  | -6.97  | 0.86  | 0.13 | 1.00 | Yes |
| Bacteria | Gemmatimonadetes | Gemmatimonadetes    |                  |                           |                     | 0.60%  | - | 4.70   | -8.29  | 17.70 | 0.48 | 1.00 | 4.24   | -4.16  | 12.63 | 0.32 | 1.00 | Yes |
| Bacteria | GN02             | BD1-5               |                  |                           |                     | 0.10%  | - | -18.81 | -50.48 | 12.86 | 0.24 | 1.00 | -3.25  | -23.73 | 17.23 | 0.76 | 1.00 | Yes |
| Bacteria | GN04             | GN15                |                  |                           |                     | 0.20%  | - | -10.45 | -32.82 | 11.92 | 0.36 | 1.00 | -2.89  | -17.35 | 11.57 | 0.70 | 1.00 | Yes |
| Bacteria | Lentisphaerae    | [Lentisphaeria]     | Victivallales    | Victivallaceae            |                     | 6.78%  | - | 1.46   | -2.55  | 5.47  | 0.47 | 1.00 | -0.07  | -2.66  | 2.52  | 0.96 | 1.00 | Yes |
| Bacteria | Lentisphaerae    | [Lentisphaeria]     | Z20              | R4-45B                    |                     | 0.20%  | - | 21.00  | -1.49  | 43.48 | 0.07 | 0.99 | 2.43   | -12.13 | 16.98 | 0.74 | 1.00 | Yes |
| Bacteria | Nitrospirae      | Nitrospira          | Nitrospirales    | [Thermodesulfobivriaceae] | DCE29               | 1.99%  | - | 0.62   | -6.60  | 7.83  | 0.87 | 1.00 | -1.44  | -6.10  | 3.22  | 0.54 | 1.00 | Yes |
| Bacteria | Nitrospirae      | Nitrospira          | Nitrospirales    | [Thermodesulfobivriaceae] | GOUTA19             | 1.20%  | - | -8.59  | -17.75 | 0.57  | 0.07 | 0.99 | -3.92  | -9.85  | 2.00  | 0.19 | 1.00 | Yes |
| Bacteria | Nitrospirae      | Nitrospira          | Nitrospirales    | [Thermodesulfobivriaceae] |                     | 0.20%  | - | 4.09   | -18.42 | 26.61 | 0.72 | 1.00 | 12.12  | -2.41  | 26.65 | 0.10 | 1.00 | Yes |
| Bacteria | Nitrospirae      | Nitrospira          | Nitrospirales    | O319-6A21                 |                     | 1.50%  | - | 2.27   | -6.03  | 10.57 | 0.59 | 1.00 | -1.90  | -7.26  | 3.47  | 0.49 | 1.00 | Yes |
| Bacteria | Nitrospirae      | Nitrospira          | Nitrospirales    | FW                        |                     | 0.10%  | - | -11.71 | -43.55 | 20.13 | 0.47 | 1.00 | -12.28 | -32.84 | 8.29  | 0.24 | 1.00 | Yes |
| Bacteria | Nitrospirae      | Nitrospira          | Nitrospirales    | Nitrospiraceae            | Nitrospira          | 3.39%  | - | -1.21  | -6.74  | 4.33  | 0.67 | 1.00 | -0.35  | -3.93  | 3.23  | 0.85 | 1.00 | Yes |
| Bacteria | Nitrospirae      | Nitrospira          | Nitrospirales    | Nitrospiraceae            |                     | 0.30%  | - | -1.28  | -19.56 | 17.01 | 0.89 | 1.00 | 3.19   | -8.63  | 15.00 | 0.60 | 1.00 | Yes |
| Bacteria | NKB19            | TSBW08              |                  |                           |                     | 0.40%  | - | 3.60   | -12.31 | 19.52 | 0.66 | 1.00 | 2.54   | -7.74  | 12.83 | 0.63 | 1.00 | Yes |
| Bacteria | OD1              | ZB2                 |                  |                           |                     | 0.40%  | - | -13.20 | -29.05 | 2.66  | 0.10 | 1.00 | -8.18  | -18.43 | 2.07  | 0.12 | 1.00 | Yes |
| Bacteria | OP1              | MSBL6               |                  |                           |                     | 0.30%  | - | -3.64  | -22.01 | 14.74 | 0.70 | 1.00 | 0.74   | -11.14 | 12.61 | 0.90 | 1.00 | Yes |
| Bacteria | OP8              | OP8_1               |                  |                           |                     | 0.40%  | - | 10.71  | -5.17  | 26.60 | 0.19 | 1.00 | 9.76   | -0.50  | 20.02 | 0.06 | 1.00 | Yes |
| Bacteria | OP9              | OPB46               | OPB72            | TIBD11                    |                     | 0.30%  | - | -10.63 | -28.96 | 7.69  | 0.26 | 1.00 | -5.08  | -16.93 | 6.77  | 0.40 | 1.00 | Yes |
| Bacteria | Other            | Other               | Other            | Other                     | Other               | 0.20%  | - | -0.74  | -23.21 | 21.73 | 0.95 | 1.00 | -0.85  | -15.37 | 13.67 | 0.91 | 1.00 | Yes |
| Bacteria | Planctomycetes   | [Brocadiae]         | Brocadiales      | Brocadaceae               | Candidatus Jettenia | 0.20%  | - | -6.81  | -29.14 | 15.53 | 0.55 | 1.00 | -4.22  | -18.65 | 10.21 | 0.57 | 1.00 | Yes |
| Bacteria | Planctomycetes   | C6                  | d113             |                           |                     | 0.10%  | - | -11.71 | -43.55 | 20.13 | 0.47 | 1.00 | -12.28 | -32.84 | 8.29  | 0.24 | 1.00 | Yes |
| Bacteria | Planctomycetes   | OM190               | agg27            |                           |                     | 0.20%  | - | -2.50  | -24.92 | 19.92 | 0.83 | 1.00 | 4.65   | -9.84  | 19.14 | 0.53 | 1.00 | Yes |
| Bacteria | Planctomycetes   | OM190               | CL500-15         |                           |                     | 0.80%  | - | -2.21  | -13.52 | 9.09  | 0.70 | 1.00 | -4.15  | -11.45 | 3.15  | 0.27 | 1.00 | Yes |
| Bacteria | Planctomycetes   | Phycisphaerae       | Phycisphaerae    |                           |                     | 0.10%  | - | -7.30  | -39.00 | 24.39 | 0.65 | 1.00 | 0.65   | -19.83 | 21.14 | 0.95 | 1.00 | Yes |
| Bacteria | Planctomycetes   | Phycisphaerae       | Phycisphaerales  | Phycisphaeraeae           |                     | 0.20%  | - | -13.60 | -36.05 | 8.86  | 0.23 | 1.00 | -6.73  | -21.25 | 7.78  | 0.36 | 1.00 | Yes |
| Bacteria | Planctomycetes   | Phycisphaerae       | Phycisphaerales  |                           |                     | 0.40%  | - | -4.79  | -20.62 | 11.04 | 0.55 | 1.00 | 0.99   | -9.24  | 11.22 | 0.85 | 1.00 | Yes |
| Bacteria | Planctomycetes   | Phycisphaerae       | Pla1             |                           |                     | 0.10%  | - | 13.40  | -18.19 | 45.00 | 0.41 | 1.00 | 17.50  | -2.89  | 37.90 | 0.09 | 1.00 | Yes |
| Bacteria | Planctomycetes   | Phycisphaerae       | WD2101           |                           |                     | 0.30%  | - | 6.06   | -12.35 | 24.46 | 0.52 | 1.00 | -2.93  | -14.83 | 8.96  | 0.63 | 1.00 | Yes |
| Bacteria | Planctomycetes   | Pla4                |                  |                           |                     | 0.20%  | - | -1.05  | -23.55 | 21.44 | 0.93 | 1.00 | 8.37   | -6.16  | 22.89 | 0.26 | 1.00 | Yes |
| Bacteria | Planctomycetes   | Planctomycetia      | Gemmatales       | Gemmataceae               | Gemmata             | 1.00%  | - | -0.23  | -10.45 | 9.98  | 0.96 | 1.00 | -1.02  | -7.63  | 5.58  | 0.76 | 1.00 | Yes |
| Bacteria | Planctomycetes   | Planctomycetia      | Gemmatales       | Gemmataceae               |                     | 0.90%  | - | 0.63   | -10.11 | 11.38 | 0.91 | 1.00 | -0.61  | -7.56  | 6.33  | 0.86 | 1.00 | Yes |
| Bacteria | Planctomycetes   | Planctomycetia      | Gemmatales       | Isosphaeraceae            | Nostocoida          | 0.10%  | - | 13.40  | -18.19 | 45.00 | 0.41 | 1.00 | 17.50  | -2.89  | 37.90 | 0.09 | 1.00 | Yes |
| Bacteria | Planctomycetes   | Planctomycetia      | Gemmatales       | Isosphaeraceae            |                     | 0.30%  | - | 3.79   | -14.54 | 22.11 | 0.69 | 1.00 | -4.86  | -16.70 | 6.98  | 0.42 | 1.00 | Yes |
| Bacteria | Planctomycetes   | Planctomycetia      | Pirellulales     | Pirellulaceae             | A17                 | 0.60%  | - | -4.47  | -17.47 | 8.53  | 0.50 | 1.00 | 0.23   | -8.17  | 8.63  | 0.96 | 1.00 | Yes |
| Bacteria | Planctomycetes   | Planctomycetia      | Pirellulales     | Pirellulaceae             | Pirellula           | 0.20%  | - | -13.60 | -36.05 | 8.86  | 0.23 | 1.00 | -6.73  | -21.25 | 7.78  | 0.36 | 1.00 | Yes |
| Bacteria | Planctomycetes   | Planctomycetia      | Pirellulales     | Pirellulaceae             |                     | 0.40%  | - | 0.19   | -15.68 | 16.07 | 0.98 | 1.00 | 6.24   | -4.01  | 16.50 | 0.23 | 1.00 | Yes |
| Bacteria | Planctomycetes   | Planctomycetia      | Planctomycetales | Planctomycetaceae         | Planctomyces        | 0.80%  | - | -1.33  | -12.73 | 10.07 | 0.82 | 1.00 | -1.31  | -8.68  | 6.06  | 0.73 | 1.00 | Yes |
| Bacteria | Planctomycetes   | vadinHA49           | DH61             |                           |                     | 0.30%  | - | 5.93   | -12.34 | 24.20 | 0.52 | 1.00 | 2.72   | -9.09  | 14.53 | 0.65 | 1.00 | Yes |
| Bacteria | Proteobacteria   | Alphaproteobacteria | BD7-3            |                           |                     | 0.80%  | - | -0.39  | -11.61 | 10.84 | 0.95 | 1.00 | -0.87  | -8.13  | 6.38  | 0.81 | 1.00 | Yes |
| Bacteria | Proteobacteria   | Alphaproteobacteria | Caulobacterales  | Caulobacteraceae          | Asticcacaulis       | 0.50%  | - | -4.35  | -18.57 | 9.88  | 0.55 | 1.00 | -1.80  | -10.99 | 7.39  | 0.70 | 1.00 | Yes |
| Bacteria | Proteobacteria   | Alphaproteobacteria | Caulobacterales  | Caulobacteraceae          | Brevundimonas       | 3.89%  | - | 1.71   | -3.49  | 6.91  | 0.52 | 1.00 | 1.13   | -2.24  | 4.49  | 0.51 | 1.00 | Yes |
| Bacteria | Proteobacteria   | Alphaproteobacteria | Caulobacterales  | Caulobacteraceae          | Mycoplana           | 7.08%  | - | 0.74   | -3.19  | 4.66  | 0.71 | 1.00 | -0.75  | -3.29  | 1.79  | 0.56 | 1.00 | Yes |
| Bacteria | Proteobacteria   | Alphaproteobacteria | Caulobacterales  | Caulobacteraceae          | Phenylobacterium    | 4.69%  | - | 4.19   | -0.54  | 8.92  | 0.08 | 1.00 | 2.19   | -0.86  | 5.25  | 0.16 | 1.00 | Yes |
| Bacteria | Proteobacteria   | Alphaproteobacteria | Caulobacterales  | Caulobacteraceae          |                     | 15.75% | - | -0.05  | -2.84  | 2.74  | 0.97 | 1.00 | -0.76  | -2.56  | 1.04  | 0.41 | 1.00 | Yes |
| Bacteria | Proteobacteria   | Alphaproteobacteria | Caulobacterales  | Caulobacteraceae          |                     | 0.10%  | - | 5.65   | -26.05 | 37.36 | 0.73 | 1.00 | 9.07   | -11.41 | 29.55 | 0.39 | 1.00 | Yes |
| Bacteria | Proteobacteria   | Alphaproteobacteria | Ellin329         |                           |                     | 1.30%  | - | 5.52   | -3.38  | 14.41 | 0.22 | 1.00 | 1.93   | -3.83  | 7.68  | 0.51 | 1.00 | Yes |
| Bacteria | Proteobacteria   | Alphaproteobacteria | Kiloniellales    | Kiloniellaceae            | Thalassospira       | 0.50%  | - | -4.11  | -18.34 | 10.12 | 0.57 | 1.00 | -3.01  | -12.21 | 6.18  | 0.52 | 1.00 | Yes |
| Bacteria | Proteobacteria   | Alphaproteobacteria | Kiloniellales    | Kiloniellales             |                     | 0.50%  | - | 3.65   | -10.53 | 17.84 | 0.61 | 1.00 | 0.33   | -8.84  | 9.50  | 0.94 | 1.00 | Yes |
| Bacteria | Proteobacteria   | Alphaproteobacteria | Other            | Other                     | Other               | 0.20%  | - | -6.25  | -28.64 | 16.14 | 0.58 | 1.00 | -3.48  | -17.95 | 10.99 | 0.64 | 1.00 | Yes |
| Bacteria | Proteobacteria   | Alphaproteobacteria | RF32             |                           |                     | 9.47%  | - | -1.27  | -4.74  | 2.19  | 0.47 | 1.00 | -0.93  | -3.17  | 1.31  | 0.41 | 1.00 | Yes |
| Bacteria | Proteobacteria   | Alphaproteobacteria | Rhizobiales      | Aurantimonadaceae         |                     | 1.60%  | - | 6.53   | -1.50  | 14.56 | 0.11 | 1.00 | 1.34   | -3.86  | 6.53  | 0.61 | 1.00 | Yes |
| Bacteria | Proteobacteria   | Alphaproteobacteria | Rhizobiales      | Bartonellaceae            | Bartonella          | 0.60%  | - | -4.44  | -17.52 | 8.64  | 0.51 | 1.00 | 0.31   | -8.14  | 8.77  | 0.94 | 1.00 | Yes |
| Bacteria | Proteobacteria   | Alphaproteobacteria | Rhizobiales      | Bartonellaceae            | Other               | 0.50%  | - | -7.00  | -21.16 | 7.16  | 0.33 | 1.00 | -1.09  | -10.24 | 8.07  | 0.82 | 1.00 | Yes |
| Bacteria | Proteobacteria   | Alphaproteobacteria | Rhizobiales      | Bartonellaceae            |                     | 0.20%  | - | 5.18   | -17.25 | 27.61 | 0.65 | 1.00 | 5.59   | -8.90  | 20.09 | 0.45 | 1.00 | Yes |
| Bacteria | Proteobacteria   | Alphaproteobacteria | Rhizobiales      | Beijerinckiaceae          | Other               | 0.30%  | - | 18.59  | 0.28   | 36.90 | 0.05 | 0.99 | 2.71   | -9.15  | 14.56 | 0.65 | 1.00 | Yes |
| Bacteria | Proteobacteria   | Alphaproteobacteria | Rhizobiales      | Beijerinckiaceae          |                     | 1.89%  | - | -3.23  | -10.63 | 4.18  | 0.39 | 1.00 | -1.73  | -6.52  | 3.06  | 0.48 | 1.00 | Yes |
| Bacteria | Proteobacteria   | Alphaproteobacteria | Rhizobiales      | Bradyrhizobiaceae         | Balneimonas         | 1.10%  | - | 2.99   | -6.68  | 12.65 | 0.54 | 1.00 | -3.29  | -9.54  | 2.95  | 0.30 | 1.00 | Yes |
| Bacteria | Proteobacteria   | Alphaproteobacteria | Rhizobiales      | Bradyrhizobiaceae         | Bosea               | 0.30%  | - | 0.94   | -17.29 | 19.18 | 0.92 | 1.00 | 1.96   | -9.83  | 13.74 | 0.74 | 1.00 | Yes |



|          |                |                     |                  |                     |                   |        |      |        |        |       |      |      |        |        |       |      |      |     |
|----------|----------------|---------------------|------------------|---------------------|-------------------|--------|------|--------|--------|-------|------|------|--------|--------|-------|------|------|-----|
| Bacteria | Proteobacteria | Alphaproteobacteria | Rhizobiales      | Bradyrhizobiaceae   | Bradyrhizobium    | 0.50%  | -    | 4.30   | -9.97  | 18.58 | 0.55 | 1.00 | 6.16   | -3.06  | 15.38 | 0.19 | 1.00 | Yes |
| Bacteria | Proteobacteria | Alphaproteobacteria | Rhizobiales      | Bradyrhizobiaceae   |                   | 0.19   | 0.33 | 3.79   | 0.71   | 6.86  | 0.02 | 0.99 | 2.40   | 0.41   | 4.39  | 0.02 | 1.00 | No  |
| Bacteria | Proteobacteria | Alphaproteobacteria | Rhizobiales      | Brucellaceae        | Ochrobactrum      | 4.69%  | -    | -3.57  | -8.34  | 1.20  | 0.14 | 1.00 | -2.94  | -6.02  | 0.14  | 0.06 | 1.00 | Yes |
| Bacteria | Proteobacteria | Alphaproteobacteria | Rhizobiales      | Brucellaceae        | Other             | 1.40%  | -    | -0.92  | -9.54  | 7.70  | 0.83 | 1.00 | -1.42  | -6.99  | 4.15  | 0.62 | 1.00 | Yes |
| Bacteria | Proteobacteria | Alphaproteobacteria | Rhizobiales      | Brucellaceae        |                   | 0.90%  | -    | -13.21 | -23.79 | -2.63 | 0.01 | 0.99 | -10.69 | -17.52 | -3.87 | 0.00 | 1.00 | Yes |
| Bacteria | Proteobacteria | Alphaproteobacteria | Rhizobiales      | Hyphomicrobiaceae   | Devosia           | 9.67%  | -    | 0.77   | -2.68  | 4.23  | 0.66 | 1.00 | -0.51  | -2.75  | 1.72  | 0.65 | 1.00 | Yes |
| Bacteria | Proteobacteria | Alphaproteobacteria | Rhizobiales      | Hyphomicrobiaceae   | Hyphomicrobium    | 3.49%  | -    | 2.59   | -2.89  | 8.07  | 0.35 | 1.00 | -1.47  | -5.02  | 2.07  | 0.41 | 1.00 | Yes |
| Bacteria | Proteobacteria | Alphaproteobacteria | Rhizobiales      | Hyphomicrobiaceae   | Other             | 0.20%  | -    | -13.60 | -36.05 | 8.86  | 0.23 | 1.00 | -6.73  | -21.25 | 7.78  | 0.36 | 1.00 | Yes |
| Bacteria | Proteobacteria | Alphaproteobacteria | Rhizobiales      | Hyphomicrobiaceae   | Pedomicrobium     | 0.40%  | -    | -12.10 | -28.03 | 3.83  | 0.14 | 1.00 | -4.21  | -14.51 | 6.10  | 0.42 | 1.00 | Yes |
| Bacteria | Proteobacteria | Alphaproteobacteria | Rhizobiales      | Hyphomicrobiaceae   | Rhodoplanes       | 3.89%  | -    | 0.20   | -4.99  | 5.40  | 0.94 | 1.00 | 1.82   | -1.54  | 5.17  | 0.29 | 1.00 | Yes |
| Bacteria | Proteobacteria | Alphaproteobacteria | Rhizobiales      | Hyphomicrobiaceae   |                   | 2.39%  | -    | -0.59  | -7.23  | 6.06  | 0.86 | 1.00 | -1.04  | -5.34  | 3.26  | 0.64 | 1.00 | Yes |
| Bacteria | Proteobacteria | Alphaproteobacteria | Rhizobiales      | Methylobacteriaceae | Methylobacterium  | 5.18%  | -    | 0.95   | -3.61  | 5.51  | 0.68 | 1.00 | -0.43  | -3.38  | 2.51  | 0.77 | 1.00 | Yes |
| Bacteria | Proteobacteria | Alphaproteobacteria | Rhizobiales      | Methylobacteriaceae |                   | 5.08%  | -    | 0.27   | -4.31  | 4.85  | 0.91 | 1.00 | 1.25   | -1.71  | 4.21  | 0.41 | 1.00 | Yes |
| Bacteria | Proteobacteria | Alphaproteobacteria | Rhizobiales      | Methylocystaceae    | Methylolipia      | 0.40%  | -    | 2.67   | -13.20 | 18.53 | 0.74 | 1.00 | 2.12   | -8.13  | 12.38 | 0.68 | 1.00 | Yes |
| Bacteria | Proteobacteria | Alphaproteobacteria | Rhizobiales      | Methylocystaceae    | Methylosinus      | 0.80%  | -    | 3.36   | -7.94  | 14.66 | 0.56 | 1.00 | -0.41  | -7.71  | 6.90  | 0.91 | 1.00 | Yes |
| Bacteria | Proteobacteria | Alphaproteobacteria | Rhizobiales      | Methylocystaceae    | Other             | 1.00%  | -    | 4.26   | -5.80  | 14.31 | 0.41 | 1.00 | 0.22   | -6.28  | 6.72  | 0.95 | 1.00 | Yes |
| Bacteria | Proteobacteria | Alphaproteobacteria | Rhizobiales      | Methylocystaceae    | Pleomorphanomonas | 1.10%  | -    | 4.11   | -5.51  | 13.73 | 0.40 | 1.00 | 0.32   | -5.90  | 6.54  | 0.92 | 1.00 | Yes |
| Bacteria | Proteobacteria | Alphaproteobacteria | Rhizobiales      | Methylocystaceae    |                   | 0.30%  | -    | -19.10 | -37.38 | -0.81 | 0.04 | 0.99 | -13.23 | -25.05 | -1.42 | 0.03 | 1.00 | Yes |
| Bacteria | Proteobacteria | Alphaproteobacteria | Rhizobiales      | Other               | Other             | 11.37% | -    | 1.10   | -2.08  | 4.28  | 0.50 | 1.00 | -0.23  | -2.28  | 1.83  | 0.83 | 1.00 | Yes |
| Bacteria | Proteobacteria | Alphaproteobacteria | Rhizobiales      | Phyllobacteriaceae  | Aminobacter       | 1.10%  | -    | -11.35 | -20.99 | -1.72 | 0.02 | 0.99 | -6.13  | -12.36 | 0.10  | 0.05 | 1.00 | Yes |
| Bacteria | Proteobacteria | Alphaproteobacteria | Rhizobiales      | Phyllobacteriaceae  | Other             | 4.99%  | -    | -0.39  | -5.05  | 4.28  | 0.87 | 1.00 | 1.42   | -1.59  | 4.43  | 0.36 | 1.00 | Yes |
| Bacteria | Proteobacteria | Alphaproteobacteria | Rhizobiales      | Phyllobacteriaceae  | Phyllobacterium   | 24.23% | -    | 1.13   | -1.25  | 3.50  | 0.35 | 1.00 | 0.57   | -0.97  | 2.10  | 0.47 | 1.00 | Yes |
| Bacteria | Proteobacteria | Alphaproteobacteria | Rhizobiales      | Phyllobacteriaceae  |                   | 5.68%  | -    | 0.19   | -4.13  | 4.51  | 0.93 | 1.00 | -0.82  | -3.62  | 1.97  | 0.56 | 1.00 | Yes |
| Bacteria | Proteobacteria | Alphaproteobacteria | Rhizobiales      | Rhizobiaceae        | Agrobacterium     | 10.97% | -    | -0.26  | -3.45  | 2.93  | 0.87 | 1.00 | 0.25   | -1.81  | 2.31  | 0.81 | 1.00 | Yes |
| Bacteria | Proteobacteria | Alphaproteobacteria | Rhizobiales      | Rhizobiaceae        | Kaistia           | 0.90%  | -    | -1.76  | -12.47 | 8.95  | 0.75 | 1.00 | -3.92  | -10.84 | 2.99  | 0.27 | 1.00 | Yes |
| Bacteria | Proteobacteria | Alphaproteobacteria | Rhizobiales      | Rhizobiaceae        | Other             | 0.40%  | -    | -0.69  | -16.68 | 15.29 | 0.93 | 1.00 | -2.20  | -12.53 | 8.13  | 0.68 | 1.00 | Yes |
| Bacteria | Proteobacteria | Alphaproteobacteria | Rhizobiales      | Rhizobiaceae        | Rhizobium         | 3.29%  | -    | -2.97  | -8.61  | 2.66  | 0.30 | 1.00 | -1.69  | -5.34  | 1.95  | 0.36 | 1.00 | Yes |
| Bacteria | Proteobacteria | Alphaproteobacteria | Rhizobiales      | Rhizobiaceae        |                   | 4.79%  | -    | 1.82   | -2.87  | 6.51  | 0.45 | 1.00 | -0.75  | -3.78  | 2.28  | 0.63 | 1.00 | Yes |
| Bacteria | Proteobacteria | Alphaproteobacteria | Rhizobiales      | Rhodobiaceae        | Affifella         | 0.20%  | -    | -13.60 | -36.05 | 8.86  | 0.23 | 1.00 | -6.73  | -21.25 | 7.78  | 0.36 | 1.00 | Yes |
| Bacteria | Proteobacteria | Alphaproteobacteria | Rhizobiales      | Xanthobacteraceae   | Blastochloris     | 0.30%  | -    | 14.50  | -3.81  | 32.82 | 0.12 | 1.00 | 7.41   | -4.43  | 19.25 | 0.22 | 1.00 | Yes |
| Bacteria | Proteobacteria | Alphaproteobacteria | Rhizobiales      | Xanthobacteraceae   | Labrys            | 0.50%  | -    | 5.42   | -8.82  | 19.67 | 0.46 | 1.00 | 2.08   | -7.13  | 11.29 | 0.66 | 1.00 | Yes |
| Bacteria | Proteobacteria | Alphaproteobacteria | Rhizobiales      | Xanthobacteraceae   | Other             | 0.90%  | -    | 1.56   | -9.08  | 12.20 | 0.77 | 1.00 | -4.66  | -11.53 | 2.21  | 0.18 | 1.00 | Yes |
| Bacteria | Proteobacteria | Alphaproteobacteria | Rhizobiales      |                     |                   | 17.15% | -    | -0.59  | -3.25  | 2.08  | 0.67 | 1.00 | -0.59  | -2.31  | 1.13  | 0.50 | 1.00 | Yes |
| Bacteria | Proteobacteria | Alphaproteobacteria | Rhodobacterales  | Hyphomonadaceae     | Maricaulis        | 0.20%  | -    | 2.95   | -19.36 | 25.27 | 0.80 | 1.00 | 3.63   | -10.79 | 18.05 | 0.62 | 1.00 | Yes |
| Bacteria | Proteobacteria | Alphaproteobacteria | Rhodobacterales  | Hyphomonadaceae     | Oceanicaulis      | 1.10%  | -    | -0.95  | -10.69 | 8.79  | 0.85 | 1.00 | 0.43   | -5.87  | 6.72  | 0.89 | 1.00 | Yes |
| Bacteria | Proteobacteria | Alphaproteobacteria | Rhodobacterales  | Hyphomonadaceae     |                   | 3.79%  | -    | -4.48  | -9.79  | 0.84  | 0.10 | 1.00 | -3.26  | -6.69  | 0.18  | 0.06 | 1.00 | Yes |
| Bacteria | Proteobacteria | Alphaproteobacteria | Rhodobacterales  | Rhodobacteraceae    | Amaricoccus       | 3.29%  | -    | -1.07  | -6.71  | 4.56  | 0.71 | 1.00 | -0.53  | -4.17  | 3.11  | 0.77 | 1.00 | Yes |
| Bacteria | Proteobacteria | Alphaproteobacteria | Rhodobacterales  | Rhodobacteraceae    | Anaerospora       | 0.60%  | -    | -3.15  | -16.14 | 9.84  | 0.63 | 1.00 | -0.02  | -8.42  | 8.37  | 1.00 | 1.00 | Yes |
| Bacteria | Proteobacteria | Alphaproteobacteria | Rhodobacterales  | Rhodobacteraceae    | Loktanelia        | 0.90%  | -    | -1.87  | -12.50 | 8.76  | 0.73 | 1.00 | -1.91  | -8.78  | 4.96  | 0.58 | 1.00 | Yes |
| Bacteria | Proteobacteria | Alphaproteobacteria | Rhodobacterales  | Rhodobacteraceae    | Marivita          | 0.60%  | -    | -5.42  | -18.35 | 7.52  | 0.41 | 1.00 | -6.91  | -15.27 | 1.44  | 0.10 | 1.00 | Yes |
| Bacteria | Proteobacteria | Alphaproteobacteria | Rhodobacterales  | Rhodobacteraceae    | Other             | 7.18%  | -    | -0.80  | -4.75  | 3.15  | 0.69 | 1.00 | 0.34   | -2.21  | 2.89  | 0.79 | 1.00 | Yes |
| Bacteria | Proteobacteria | Alphaproteobacteria | Rhodobacterales  | Rhodobacteraceae    | Paracoccus        | 8.67%  | -    | 1.96   | -1.66  | 5.58  | 0.29 | 1.00 | 1.01   | -1.33  | 3.35  | 0.40 | 1.00 | Yes |
| Bacteria | Proteobacteria | Alphaproteobacteria | Rhodobacterales  | Rhodobacteraceae    | Rhodobacter       | 6.28%  | -    | -2.15  | -6.26  | 1.96  | 0.31 | 1.00 | -2.42  | -5.07  | 0.24  | 0.07 | 1.00 | Yes |
| Bacteria | Proteobacteria | Alphaproteobacteria | Rhodobacterales  | Rhodobacteraceae    | Rubellimicrobium  | 1.79%  | -    | -4.04  | -11.75 | 3.66  | 0.30 | 1.00 | -0.36  | -5.34  | 4.63  | 0.89 | 1.00 | Yes |
| Bacteria | Proteobacteria | Alphaproteobacteria | Rhodobacterales  | Rhodobacteraceae    |                   | 22.33% | -    | 0.01   | -2.46  | 2.48  | 0.99 | 1.00 | 0.65   | -0.94  | 2.25  | 0.42 | 1.00 | Yes |
| Bacteria | Proteobacteria | Alphaproteobacteria | Rhodospirillales | Acetobacteraceae    | Acetobacter       | 2.89%  | -    | 0.34   | -5.68  | 6.36  | 0.91 | 1.00 | 2.05   | -1.83  | 5.94  | 0.30 | 1.00 | Yes |
| Bacteria | Proteobacteria | Alphaproteobacteria | Rhodospirillales | Acetobacteraceae    | Gluconobacter     | 0.60%  | -    | -3.72  | -16.72 | 9.27  | 0.57 | 1.00 | -0.84  | -9.24  | 7.56  | 0.84 | 1.00 | Yes |
| Bacteria | Proteobacteria | Alphaproteobacteria | Rhodospirillales | Acetobacteraceae    | Other             | 0.80%  | -    | 0.42   | -11.02 | 11.86 | 0.94 | 1.00 | -1.23  | -8.63  | 6.16  | 0.74 | 1.00 | Yes |
| Bacteria | Proteobacteria | Alphaproteobacteria | Rhodospirillales | Acetobacteraceae    | Roseococcus       | 0.40%  | -    | -1.00  | -16.96 | 14.97 | 0.90 | 1.00 | 5.85   | -4.46  | 16.16 | 0.27 | 1.00 | Yes |
| Bacteria | Proteobacteria | Alphaproteobacteria | Rhodospirillales | Acetobacteraceae    | Roseomonas        | 0.40%  | -    | -3.78  | -19.62 | 12.07 | 0.64 | 1.00 | -2.10  | -12.34 | 8.14  | 0.69 | 1.00 | Yes |
| Bacteria | Proteobacteria | Alphaproteobacteria | Rhodospirillales | Acetobacteraceae    |                   | 10.07% | -    | -1.90  | -5.21  | 1.41  | 0.26 | 1.00 | -0.29  | -2.43  | 1.86  | 0.79 | 1.00 | Yes |
| Bacteria | Proteobacteria | Alphaproteobacteria | Rhodospirillales | Rhodospirillaceae   | Azospirillum      | 1.00%  | -    | 1.82   | -8.25  | 11.90 | 0.72 | 1.00 | -4.08  | -10.59 | 2.42  | 0.22 | 1.00 | Yes |
| Bacteria | Proteobacteria | Alphaproteobacteria | Rhodospirillales | Rhodospirillaceae   | Inquilinus        | 0.20%  | -    | -13.60 | -36.05 | 8.86  | 0.23 | 1.00 | -6.73  | -21.25 | 7.78  | 0.36 | 1.00 | Yes |
| Bacteria | Proteobacteria | Alphaproteobacteria | Rhodospirillales | Rhodospirillaceae   | Other             | 0.40%  | -    | 1.80   | -14.07 | 17.86 | 0.82 | 1.00 | -0.56  | -10.81 | 9.70  | 0.92 | 1.00 | Yes |
| Bacteria | Proteobacteria | Alphaproteobacteria | Rhodospirillales | Rhodospirillaceae   | Phaeospirillum    | 0.10%  | -    | -7.52  | -39.19 | 24.14 | 0.64 | 1.00 | -8.08  | -28.54 | 12.38 | 0.44 | 1.00 | Yes |
| Bacteria | Proteobacteria | Alphaproteobacteria | Rhodospirillales | Rhodospirillaceae   | Skermanella       | 1.20%  | -    | 4.03   | -5.19  | 13.26 | 0.39 | 1.00 | -2.38  | -8.35  | 3.58  | 0.43 | 1.00 | Yes |
| Bacteria | Proteobacteria | Alphaproteobacteria | Rhodospirillales | Rhodospirillaceae   |                   | 6.88%  | -    | -1.26  | -5.30  | 2.77  | 0.54 | 1.00 | -0.83  | -3.44  | 1.78  | 0.53 | 1.00 | Yes |
| Bacteria | Proteobacteria | Alphaproteobacteria | Rhodospirillales |                     |                   | 1.40%  | -    | -1.15  | -11.71 | 5.41  | 0.47 | 1.00 | -2.33  | -7.87  | 3.20  | 0.41 | 1.00 | Yes |
| Bacteria | Proteobacteria | Alphaproteobacteria | Rickettsiales    | mitochondria        | Other             | 16.15% | -    | 3.26   | 0.54   | 5.99  | 0.02 | 0.99 | 1.43   | -0.33  | 3.20  | 0.11 | 1.00 | Yes |
| Bacteria | Proteobacteria | Alphaproteobacteria | Rickettsiales    | Pelagibacteraceae   |                   | 0.40%  | -    | -3.57  | -19.51 | 12.36 | 0.66 | 1.00 | 2.86   | -7.43  | 13.16 | 0.59 | 1.00 | Yes |
| Bacteria | Proteobacteria | Alphaproteobacteria | Rickettsiales    | Rickettsiaceae      | Wolbachia         | 4.29%  | -    | -5.17  | -10.15 | -0.19 | 0.04 | 0.99 | -2.74  | -5.95  | 0.48  | 0.10 | 1.00 | Yes |
| Bacteria | Proteobacteria | Alphaproteobacteria | Rickettsiales    |                     |                   | 0.40%  | -    | 14.01  | -1.85  | 29.88 | 0.08 | 1.00 | 9.16   | -1.09  | 19.42 | 0.08 | 1.00 | Yes |
| Bacteria | Proteobacteria | Alphaproteobacteria | Sphingomonadales | Erythrobacteraceae  | Erythrobacter     | 2.49%  | -    | 5.69   | -0.76  | 12.14 | 0.08 | 1.00 | 0.96   | -3.21  | 5.13  | 0.65 | 1.00 | Yes |
| Bacteria | Proteobacteria | Alphaproteobacteria | Sphingomonadales | Erythrobacteraceae  | Other             | 0.30%  | -    | -18.87 | -37.17 | -0.57 | 0.04 | 0.99 | -9.37  | -21.21 | 2.46  | 0.12 | 1.00 | Yes |
| Bacteria | Proteobacteria | Alphaproteobacteria | Sphingomonadales | Erythrobacteraceae  |                   | 5.08%  | -    | -0.12  | -4.70  | 4.46  | 0.96 | 1.00 | 1.25   | -1.70  | 4.21  | 0.41 | 1.00 | Yes |
| Bacteria | Proteobacteria | Alphaproteobacteria | Sphingomonadales | Sphingomonadaceae   | Kaistobacter      | 3.69%  | -    | -1.81  | -7.24  | 3.62  | 0.51 | 1.00 | -3.44  | -6.94  | 0.07  | 0.05 | 1.00 | Yes |
| Bacteria | Proteobacteria | Alphaproteobacteria | Sphingomonadales | Sphingomonadaceae   | Novosphingobium   | 4.09%  | -    | 1.55   | -3.56  | 6.65  | 0.55 | 1.00 | 0.65   | -2.65  | 3.95  | 0.70 | 1.00 | Yes |
| Bacteria | Proteobacteria | Alphaproteobacteria | Sphingomonadales | Sphingomonadaceae   | Other             | 1.89%  | -    | 6.14   | -1.25  | 13.53 | 0.10 | 1.00 | 4.59   | -0.19  | 9.36  | 0.06 | 1.00 | Yes |

|          |                |                     |                   |                    |                           |        |      |        |        |       |      |      |        |        |       |      |      |     |
|----------|----------------|---------------------|-------------------|--------------------|---------------------------|--------|------|--------|--------|-------|------|------|--------|--------|-------|------|------|-----|
| Bacteria | Proteobacteria | Alphaproteobacteria | Sphingomonadales  | Sphingomonadaceae  | Sphingobium               | 1.99%  | -    | -0.75  | -8.00  | 6.49  | 0.84 | 1.00 | 0.49   | -4.19  | 5.17  | 0.84 | 1.00 | Yes |
| Bacteria | Proteobacteria | Alphaproteobacteria | Sphingomonadales  | Sphingomonadaceae  | Sphingomonas              | 21.04% | -    | 2.13   | -0.36  | 4.61  | 0.09 | 1.00 | 0.79   | -0.82  | 2.40  | 0.34 | 1.00 | Yes |
| Bacteria | Proteobacteria | Alphaproteobacteria | Sphingomonadales  | Sphingomonadaceae  | Sphingopyxis              | 2.89%  | -    | -5.72  | -11.68 | 0.24  | 0.06 | 0.99 | -3.73  | -7.58  | 0.12  | 0.06 | 1.00 | Yes |
| Bacteria | Proteobacteria | Alphaproteobacteria | Sphingomonadales  | Sphingomonadaceae  |                           | 8.57%  | -    | -0.99  | -4.58  | 2.61  | 0.59 | 1.00 | -0.85  | -3.17  | 1.47  | 0.47 | 1.00 | Yes |
| Bacteria | Proteobacteria | Alphaproteobacteria | Sphingomonadales  |                    |                           | 0.70%  | -    | -13.06 | -25.01 | -1.10 | 0.03 | 0.99 | -9.40  | -17.11 | -1.68 | 0.02 | 1.00 | Yes |
| Bacteria | Proteobacteria | Alphaproteobacteria |                   |                    |                           | 2.49%  | -    | -1.66  | -8.08  | 4.77  | 0.61 | 1.00 | -3.08  | -7.23  | 1.07  | 0.15 | 1.00 | Yes |
| Bacteria | Proteobacteria | Betaproteobacteria  | A21b              | EB1003             |                           | 0.40%  | -    | 4.53   | -11.55 | 20.61 | 0.58 | 1.00 | -2.13  | -12.52 | 8.26  | 0.69 | 1.00 | Yes |
| Bacteria | Proteobacteria | Betaproteobacteria  | A21b              | UD5                |                           | 0.10%  | -    | -11.71 | -43.55 | 20.13 | 0.47 | 1.00 | -12.28 | -32.84 | 8.29  | 0.24 | 1.00 | Yes |
| Bacteria | Proteobacteria | Betaproteobacteria  | ASSO-13           |                    |                           | 2.79%  | -    | 1.66   | -4.44  | 7.77  | 0.59 | 1.00 | -1.19  | -5.13  | 2.76  | 0.55 | 1.00 | Yes |
| Bacteria | Proteobacteria | Betaproteobacteria  | Burkholderiales   | Alcaligenaceae     | Achromobacter             | 14.46% | -    | 3.13   | 0.28   | 5.97  | 0.03 | 0.99 | 1.79   | -0.05  | 3.63  | 0.06 | 1.00 | Yes |
| Bacteria | Proteobacteria | Betaproteobacteria  | Burkholderiales   | Alcaligenaceae     | Oligella                  | 3.49%  | -    | -0.64  | -6.24  | 4.97  | 0.82 | 1.00 | -0.38  | -4.00  | 3.24  | 0.84 | 1.00 | Yes |
| Bacteria | Proteobacteria | Betaproteobacteria  | Burkholderiales   | Alcaligenaceae     | Other                     | 0.80%  | -    | -4.87  | -16.14 | 6.41  | 0.40 | 1.00 | -2.99  | -10.27 | 4.30  | 0.42 | 1.00 | Yes |
| Bacteria | Proteobacteria | Betaproteobacteria  | Burkholderiales   | Alcaligenaceae     | Sutterella                | 0.53   | 0.47 | 1.62   | -0.54  | 3.78  | 0.14 | 1.00 | 0.09   | -1.30  | 1.49  | 0.90 | 1.00 | No  |
| Bacteria | Proteobacteria | Betaproteobacteria  | Burkholderiales   | Alcaligenaceae     |                           | 4.59%  | -    | -4.42  | -9.30  | 0.46  | 0.08 | 0.99 | -4.09  | -7.24  | -0.94 | 0.01 | 1.00 | Yes |
| Bacteria | Proteobacteria | Betaproteobacteria  | Burkholderiales   | Burkholderiaceae   | Burkholderia              | 8.57%  | -    | 1.65   | -1.97  | 5.26  | 0.37 | 1.00 | 0.99   | -1.35  | 3.32  | 0.41 | 1.00 | Yes |
| Bacteria | Proteobacteria | Betaproteobacteria  | Burkholderiales   | Burkholderiaceae   | Lautropia                 | 7.48%  | -    | 0.61   | -3.24  | 4.46  | 0.76 | 1.00 | -0.91  | -3.40  | 1.57  | 0.47 | 1.00 | Yes |
| Bacteria | Proteobacteria | Betaproteobacteria  | Burkholderiales   | Burkholderiaceae   | Pandoraea                 | 0.40%  | -    | -3.73  | -19.57 | 12.11 | 0.64 | 1.00 | 3.01   | -7.23  | 13.24 | 0.56 | 1.00 | Yes |
| Bacteria | Proteobacteria | Betaproteobacteria  | Burkholderiales   | Burkholderiaceae   | Salinispora               | 0.20%  | -    | 20.38  | -1.97  | 42.73 | 0.07 | 0.99 | 5.91   | -8.55  | 20.38 | 0.42 | 1.00 | Yes |
| Bacteria | Proteobacteria | Betaproteobacteria  | Burkholderiales   | Burkholderiaceae   |                           | 1.30%  | -    | 0.78   | -8.09  | 9.65  | 0.86 | 1.00 | 2.32   | -3.41  | 8.05  | 0.43 | 1.00 | Yes |
| Bacteria | Proteobacteria | Betaproteobacteria  | Burkholderiales   | Comamonadaceae     | Azohydromonas             | 0.40%  | -    | 17.79  | 1.96   | 33.62 | 0.03 | 0.99 | 8.01   | -2.23  | 18.26 | 0.13 | 1.00 | Yes |
| Bacteria | Proteobacteria | Betaproteobacteria  | Burkholderiales   | Comamonadaceae     | Brachymonas               | 0.20%  | -    | -4.81  | -27.26 | 17.63 | 0.67 | 1.00 | 2.11   | -12.39 | 16.62 | 0.77 | 1.00 | Yes |
| Bacteria | Proteobacteria | Betaproteobacteria  | Burkholderiales   | Comamonadaceae     | Comamonas                 | 24.03% | -    | 1.20   | -1.18  | 3.58  | 0.32 | 1.00 | 0.03   | -1.51  | 1.57  | 0.97 | 1.00 | Yes |
| Bacteria | Proteobacteria | Betaproteobacteria  | Burkholderiales   | Comamonadaceae     | Delftia                   | 0.57   | 0.70 | 0.25   | -1.24  | 1.74  | 0.74 | 1.00 | 0.19   | -0.77  | 1.15  | 0.70 | 1.00 | No  |
| Bacteria | Proteobacteria | Betaproteobacteria  | Burkholderiales   | Comamonadaceae     | Hydrogenophaga            | 6.18%  | -    | 1.50   | -2.66  | 5.67  | 0.48 | 1.00 | -1.24  | -3.94  | 1.45  | 0.36 | 1.00 | Yes |
| Bacteria | Proteobacteria | Betaproteobacteria  | Burkholderiales   | Comamonadaceae     | Hylemonella               | 0.20%  | -    | 3.77   | -18.65 | 26.19 | 0.74 | 1.00 | 5.13   | -9.35  | 19.62 | 0.49 | 1.00 | Yes |
| Bacteria | Proteobacteria | Betaproteobacteria  | Burkholderiales   | Comamonadaceae     | Limnochabans              | 0.30%  | -    | 0.60   | -17.70 | 18.91 | 0.95 | 1.00 | -6.57  | -18.40 | 5.25  | 0.28 | 1.00 | Yes |
| Bacteria | Proteobacteria | Betaproteobacteria  | Burkholderiales   | Comamonadaceae     | Methylibium               | 0.70%  | -    | -0.86  | -12.90 | 11.18 | 0.89 | 1.00 | -1.08  | -8.86  | 6.70  | 0.78 | 1.00 | Yes |
| Bacteria | Proteobacteria | Betaproteobacteria  | Burkholderiales   | Comamonadaceae     | Other                     | 20.74% | -    | -0.48  | -2.98  | 2.01  | 0.70 | 1.00 | -0.51  | -2.13  | 1.10  | 0.53 | 1.00 | Yes |
| Bacteria | Proteobacteria | Betaproteobacteria  | Burkholderiales   | Comamonadaceae     | Rubrivivax                | 0.20%  | -    | -8.15  | -31.18 | 14.87 | 0.49 | 1.00 | -2.85  | -17.74 | 12.03 | 0.71 | 1.00 | Yes |
| Bacteria | Proteobacteria | Betaproteobacteria  | Burkholderiales   | Comamonadaceae     | Tepidimonas               | 1.50%  | -    | 9.29   | 1.03   | 17.55 | 0.03 | 0.99 | 4.64   | -0.70  | 9.99  | 0.09 | 1.00 | Yes |
| Bacteria | Proteobacteria | Betaproteobacteria  | Burkholderiales   | Comamonadaceae     |                           | 0.41   | 0.47 | 0.88   | -1.27  | 3.02  | 0.42 | 1.00 | 0.18   | -1.21  | 1.56  | 0.80 | 1.00 | No  |
| Bacteria | Proteobacteria | Betaproteobacteria  | Burkholderiales   | Other              | Other                     | 0.40%  | -    | 4.05   | -11.77 | 19.87 | 0.62 | 1.00 | -2.61  | -12.83 | 7.61  | 0.62 | 1.00 | Yes |
| Bacteria | Proteobacteria | Betaproteobacteria  | Burkholderiales   | Oxalobacteraceae   | Cupriavidus               | 2.59%  | -    | -2.92  | -9.24  | 3.39  | 0.36 | 1.00 | -1.05  | -5.13  | 3.03  | 0.61 | 1.00 | Yes |
| Bacteria | Proteobacteria | Betaproteobacteria  | Burkholderiales   | Oxalobacteraceae   | Janthinobacterium         | 1.79%  | -    | 5.27   | -2.29  | 12.83 | 0.17 | 1.00 | 3.07   | -1.81  | 7.96  | 0.22 | 1.00 | Yes |
| Bacteria | Proteobacteria | Betaproteobacteria  | Burkholderiales   | Oxalobacteraceae   | Other                     | 22.53% | -    | 1.68   | -0.72  | 4.08  | 0.17 | 1.00 | 0.63   | -0.93  | 2.18  | 0.43 | 1.00 | Yes |
| Bacteria | Proteobacteria | Betaproteobacteria  | Burkholderiales   | Oxalobacteraceae   | Oxalobacter               | 22.43% | -    | -0.64  | -3.09  | 1.81  | 0.61 | 1.00 | -0.56  | -2.14  | 1.02  | 0.48 | 1.00 | Yes |
| Bacteria | Proteobacteria | Betaproteobacteria  | Burkholderiales   | Oxalobacteraceae   | Polynucleobacter          | 0.60%  | -    | -1.04  | -14.03 | 11.95 | 0.88 | 1.00 | -2.51  | -10.91 | 5.88  | 0.56 | 1.00 | Yes |
| Bacteria | Proteobacteria | Betaproteobacteria  | Burkholderiales   | Oxalobacteraceae   | Ralstonia†                | 1.06   | 0.70 | 0.72   | -0.75  | 2.19  | 0.33 | 1.00 | 0.43   | -0.52  | 1.38  | 0.37 | 1.00 | No  |
| Bacteria | Proteobacteria | Betaproteobacteria  | Burkholderiales   | Oxalobacteraceae   |                           | 7.68%  | -    | -0.92  | -4.67  | 2.83  | 0.63 | 1.00 | -0.63  | -3.05  | 1.79  | 0.61 | 1.00 | Yes |
| Bacteria | Proteobacteria | Betaproteobacteria  | Burkholderiales   |                    |                           | 2.69%  | -    | 2.84   | -3.35  | 9.03  | 0.37 | 1.00 | -0.05  | -4.05  | 3.95  | 0.98 | 1.00 | Yes |
| Bacteria | Proteobacteria | Betaproteobacteria  | Ellin6067         |                    |                           | 2.79%  | -    | -1.48  | -7.57  | 4.61  | 0.63 | 1.00 | -0.35  | -4.29  | 3.59  | 0.86 | 1.00 | Yes |
| Bacteria | Proteobacteria | Betaproteobacteria  | Gallionellales    | Gallionellaceae    | Gallionella               | 0.60%  | -    | 4.32   | -8.65  | 17.28 | 0.51 | 1.00 | 3.09   | -5.29  | 11.47 | 0.47 | 1.00 | Yes |
| Bacteria | Proteobacteria | Betaproteobacteria  | Hydrogenophilales | Hydrogenophilaceae | Thiobacillus              | 1.99%  | -    | 3.55   | -3.60  | 10.70 | 0.33 | 1.00 | 1.37   | -3.25  | 5.99  | 0.56 | 1.00 | Yes |
| Bacteria | Proteobacteria | Betaproteobacteria  | Methylophilales   | Methylophilaceae   | Methylotenera             | 3.19%  | -    | 6.45   | 0.80   | 12.09 | 0.03 | 0.99 | 0.50   | -3.16  | 4.16  | 0.79 | 1.00 | Yes |
| Bacteria | Proteobacteria | Betaproteobacteria  | Methylophilales   | Methylophilaceae   |                           | 1.50%  | -    | 7.78   | -0.49  | 16.06 | 0.07 | 0.99 | 5.65   | 0.30   | 11.00 | 0.04 | 1.00 | Yes |
| Bacteria | Proteobacteria | Betaproteobacteria  | Methylophilales   |                    |                           | 0.10%  | -    | -3.73  | -35.36 | 27.90 | 0.82 | 1.00 | 11.41  | -9.02  | 31.84 | 0.27 | 1.00 | Yes |
| Bacteria | Proteobacteria | Betaproteobacteria  | MND1              |                    |                           | 2.89%  | -    | -2.54  | -8.55  | 3.47  | 0.41 | 1.00 | -3.35  | -7.23  | 0.52  | 0.09 | 1.00 | Yes |
| Bacteria | Proteobacteria | Betaproteobacteria  | Neisseriales      | Neisseriaceae      | Chromobacterium           | 0.50%  | -    | -0.16  | -14.43 | 14.10 | 0.98 | 1.00 | -4.90  | -14.11 | 4.32  | 0.30 | 1.00 | Yes |
| Bacteria | Proteobacteria | Betaproteobacteria  | Neisseriales      | Neisseriaceae      | Eikenella                 | 0.80%  | -    | -10.51 | -21.69 | 0.68  | 0.07 | 0.99 | -3.36  | -10.60 | 3.88  | 0.36 | 1.00 | Yes |
| Bacteria | Proteobacteria | Betaproteobacteria  | Neisseriales      | Neisseriaceae      | Kingella                  | 0.60%  | -    | 7.06   | -5.91  | 20.03 | 0.29 | 1.00 | 5.11   | -3.27  | 13.50 | 0.23 | 1.00 | Yes |
| Bacteria | Proteobacteria | Betaproteobacteria  | Neisseriales      | Neisseriaceae      | Microvirgula              | 0.90%  | -    | 8.04   | -2.61  | 18.69 | 0.14 | 1.00 | 1.10   | -5.79  | 7.99  | 0.75 | 1.00 | Yes |
| Bacteria | Proteobacteria | Betaproteobacteria  | Neisseriales      | Neisseriaceae      | Neisseria                 | 20.24% | -    | -0.24  | -2.75  | 2.26  | 0.85 | 1.00 | -1.74  | -3.36  | -0.12 | 0.03 | 1.00 | Yes |
| Bacteria | Proteobacteria | Betaproteobacteria  | Neisseriales      | Neisseriaceae      | Other                     | 0.10%  | -    | 10.43  | -21.23 | 42.10 | 0.52 | 1.00 | 21.08  | 0.66   | 41.51 | 0.04 | 1.00 | Yes |
| Bacteria | Proteobacteria | Betaproteobacteria  | Neisseriales      | Neisseriaceae      | Vogesella                 | 0.30%  | -    | 2.15   | -16.16 | 20.45 | 0.82 | 1.00 | -6.13  | -17.96 | 5.69  | 0.31 | 1.00 | Yes |
| Bacteria | Proteobacteria | Betaproteobacteria  | Neisseriales      | Neisseriaceae      |                           | 5.68%  | -    | 0.55   | -3.83  | 4.94  | 0.80 | 1.00 | -0.93  | -3.77  | 1.90  | 0.52 | 1.00 | Yes |
| Bacteria | Proteobacteria | Betaproteobacteria  | Nitrosomonadales  | Nitrosomonadaceae  |                           | 1.60%  | -    | -6.05  | -14.08 | 1.98  | 0.14 | 1.00 | -2.97  | -8.16  | 2.22  | 0.26 | 1.00 | Yes |
| Bacteria | Proteobacteria | Betaproteobacteria  | Other             | Other              | Other                     | 1.20%  | -    | 0.42   | -8.78  | 9.63  | 0.93 | 1.00 | -1.80  | -7.75  | 4.15  | 0.55 | 1.00 | Yes |
| Bacteria | Proteobacteria | Betaproteobacteria  | Procabacteriales  | Procabacteriaceae  |                           | 0.20%  | -    | 0.12   | -22.28 | 22.51 | 0.99 | 1.00 | 5.16   | -9.31  | 19.63 | 0.48 | 1.00 | Yes |
| Bacteria | Proteobacteria | Betaproteobacteria  | Rhodocyclales     | Rhodocyclaceae     | C39                       | 0.80%  | -    | 5.77   | -5.54  | 17.09 | 0.32 | 1.00 | -1.16  | -8.48  | 6.15  | 0.76 | 1.00 | Yes |
| Bacteria | Proteobacteria | Betaproteobacteria  | Rhodocyclales     | Rhodocyclaceae     | Candidatus Accumulibacter | 0.40%  | -    | -2.56  | -18.47 | 13.36 | 0.75 | 1.00 | 4.11   | -6.17  | 14.39 | 0.43 | 1.00 | Yes |
| Bacteria | Proteobacteria | Betaproteobacteria  | Rhodocyclales     | Rhodocyclaceae     | Dechloromonas             | 6.78%  | -    | -1.00  | -4.99  | 2.99  | 0.62 | 1.00 | -1.39  | -3.97  | 1.18  | 0.29 | 1.00 | Yes |
| Bacteria | Proteobacteria | Betaproteobacteria  | Rhodocyclales     | Rhodocyclaceae     | Dok59                     | 2.29%  | -    | 7.45   | 0.78   | 14.13 | 0.03 | 0.99 | 3.41   | -0.91  | 7.73  | 0.12 | 1.00 | Yes |
| Bacteria | Proteobacteria | Betaproteobacteria  | Rhodocyclales     | Rhodocyclaceae     | Hydrogenophilus           | 1.69%  | -    | 1.75   | -6.01  | 9.51  | 0.66 | 1.00 | 1.93   | -3.08  | 6.94  | 0.45 | 1.00 | Yes |
| Bacteria | Proteobacteria | Betaproteobacteria  | Rhodocyclales     | Rhodocyclaceae     | K82                       | 0.10%  | -    | 22.54  | -9.01  | 54.09 | 0.16 | 1.00 | -7.94  | -28.35 | 12.46 | 0.45 | 1.00 | Yes |
| Bacteria | Proteobacteria | Betaproteobacteria  | Rhodocyclales     | Rhodocyclaceae     | Methyloversatilis         | 1.69%  | -    | 0.58   | -7.17  | 8.32  | 0.88 | 1.00 | 1.17   | -3.84  | 6.17  | 0.65 | 1.00 | Yes |
| Bacteria | Proteobacteria | Betaproteobacteria  | Rhodocyclales     | Rhodocyclaceae     | Other                     | 3.79%  | -    | 4.67   | -0.57  | 9.91  | 0.08 | 1.00 | -0.47  | -3.86  | 2.92  | 0.78 | 1.00 | Yes |
| Bacteria | Proteobacteria | Betaproteobacteria  | Rhodocyclales     | Rhodocyclaceae     | Propionivibrio            | 0.10%  | -    | -21.64 | -53.21 | 9.93  | 0.18 | 1.00 | 20.27  | -0.11  | 40.65 | 0.05 | 1.00 | Yes |
| Bacteria | Proteobacteria | Betaproteobacteria  | Rhodocyclales     | Rhodocyclaceae     | Sterolibacterium          | 0.20%  | -    | 4.66   | -17.75 | 27.06 | 0.68 | 1.00 | 0.25   | -14.23 | 14.73 | 0.97 | 1.00 | Yes |

|          |                |                       |                      |                      |                    |        |      |        |        |       |      |      |        |        |       |      |      |     |
|----------|----------------|-----------------------|----------------------|----------------------|--------------------|--------|------|--------|--------|-------|------|------|--------|--------|-------|------|------|-----|
| Bacteria | Proteobacteria | Betaproteobacteria    | Rhodocyclales        | Rhodocyclaceae       | Sulfuritalea       | 1.10%  | -    | -0.41  | -10.02 | 9.20  | 0.93 | 1.00 | -0.33  | -6.54  | 5.88  | 0.92 | 1.00 | Yes |
| Bacteria | Proteobacteria | Betaproteobacteria    | Rhodocyclales        | Rhodocyclaceae       | Thauera            | 4.49%  | -    | 1.27   | -3.55  | 6.09  | 0.61 | 1.00 | 0.79   | -2.32  | 3.91  | 0.62 | 1.00 | Yes |
| Bacteria | Proteobacteria | Betaproteobacteria    | Rhodocyclales        | Rhodocyclaceae       | Zoogloea           | 12.06% | -    | 0.65   | -2.47  | 3.76  | 0.68 | 1.00 | 0.25   | -1.76  | 2.27  | 0.81 | 1.00 | Yes |
| Bacteria | Proteobacteria | Betaproteobacteria    | Rhodocyclales        | Rhodocyclaceae       |                    | 5.18%  | -    | -1.23  | -5.79  | 3.33  | 0.60 | 1.00 | -0.43  | -3.38  | 2.52  | 0.77 | 1.00 | Yes |
| Bacteria | Proteobacteria | Betaproteobacteria    | SC-I-84              |                      |                    | 3.69%  | -    | -0.91  | -6.28  | 4.46  | 0.74 | 1.00 | -1.30  | -4.77  | 2.17  | 0.46 | 1.00 | Yes |
| Bacteria | Proteobacteria | Betaproteobacteria    | Thiobacterales       | Other                | Other              | 0.30%  | -    | -3.17  | -21.43 | 15.09 | 0.73 | 1.00 | -1.16  | -12.96 | 10.64 | 0.85 | 1.00 | Yes |
| Bacteria | Proteobacteria | Betaproteobacteria    | Thiobacterales       |                      |                    | 2.49%  | -    | -0.38  | -6.87  | 6.10  | 0.91 | 1.00 | -2.13  | -6.31  | 2.06  | 0.32 | 1.00 | Yes |
| Bacteria | Proteobacteria | Betaproteobacteria    |                      |                      |                    | 2.79%  | -    | -1.37  | -7.52  | 4.78  | 0.66 | 1.00 | -4.15  | -8.12  | -0.19 | 0.04 | 1.00 | Yes |
| Bacteria | Proteobacteria | Deltaproteobacteria   | [Entotheonellales]   | [Entotheonellaceae]  | Candidatus Entothe | 0.30%  | -    | -9.38  | -27.70 | 8.94  | 0.32 | 1.00 | -7.88  | -19.72 | 3.95  | 0.19 | 1.00 | Yes |
| Bacteria | Proteobacteria | Deltaproteobacteria   | Bdellovibrionales    | Bacteriovoraceae     | Bacteriovorax      | 0.50%  | -    | -5.11  | -19.35 | 9.14  | 0.48 | 1.00 | -1.01  | -10.22 | 8.19  | 0.83 | 1.00 | Yes |
| Bacteria | Proteobacteria | Deltaproteobacteria   | Bdellovibrionales    | Bacteriovoraceae     |                    | 0.10%  | -    | -12.98 | -44.72 | 18.76 | 0.42 | 1.00 | -5.58  | -26.09 | 14.94 | 0.59 | 1.00 | Yes |
| Bacteria | Proteobacteria | Deltaproteobacteria   | Bdellovibrionales    | Bdellovibrionaceae   | Bdellovibrio       | 0.80%  | -    | 0.32   | -10.99 | 11.62 | 0.96 | 1.00 | 1.70   | -5.61  | 9.00  | 0.65 | 1.00 | Yes |
| Bacteria | Proteobacteria | Deltaproteobacteria   | BPC076               |                      |                    | 0.40%  | -    | -19.98 | -35.84 | -4.12 | 0.01 | 0.99 | -6.74  | -17.02 | 3.53  | 0.20 | 1.00 | Yes |
| Bacteria | Proteobacteria | Deltaproteobacteria   | Desulfarculales      | Desulfarculaceae     |                    | 0.10%  | -    | -6.46  | -38.54 | 25.62 | 0.69 | 1.00 | 5.39   | -15.35 | 26.12 | 0.61 | 1.00 | Yes |
| Bacteria | Proteobacteria | Deltaproteobacteria   | Desulfobacterales    | Desulfobacteraceae   | Desulfococcus      | 0.40%  | -    | 6.33   | -9.57  | 22.23 | 0.43 | 1.00 | 4.65   | -5.63  | 14.92 | 0.38 | 1.00 | Yes |
| Bacteria | Proteobacteria | Deltaproteobacteria   | Desulfobacterales    | Desulfobacteraceae   | Desulfotignum      | 0.10%  | -    | 13.76  | -18.25 | 45.77 | 0.40 | 1.00 | 8.38   | -12.30 | 29.07 | 0.43 | 1.00 | Yes |
| Bacteria | Proteobacteria | Deltaproteobacteria   | Desulfobacterales    | Desulfobacteraceae   |                    | 0.70%  | -    | 5.76   | -6.25  | 17.78 | 0.35 | 1.00 | 4.89   | -2.87  | 12.65 | 0.22 | 1.00 | Yes |
| Bacteria | Proteobacteria | Deltaproteobacteria   | Desulfobacterales    | Desulfobulbaceae     | Desulfobulbus      | 0.60%  | -    | -7.15  | -20.16 | 5.87  | 0.28 | 1.00 | -1.13  | -9.54  | 7.29  | 0.79 | 1.00 | Yes |
| Bacteria | Proteobacteria | Deltaproteobacteria   | Desulfobacterales    | Desulfobulbaceae     |                    | 1.10%  | -    | 1.71   | -7.97  | 11.38 | 0.73 | 1.00 | -0.68  | -6.93  | 5.58  | 0.83 | 1.00 | Yes |
| Bacteria | Proteobacteria | Deltaproteobacteria   | Desulfovibrionales   | Desulfomicrobiaceae  | Desulfomicrobium   | 0.20%  | -    | 0.94   | -21.47 | 23.35 | 0.93 | 1.00 | 2.72   | -11.76 | 17.20 | 0.71 | 1.00 | Yes |
| Bacteria | Proteobacteria | Deltaproteobacteria   | Desulfovibrionales   | Desulfovibrionaceae  | Bilophila          | 0.15   | 0.25 | 0.20   | -3.86  | 4.25  | 0.92 | 1.00 | -0.39  | -3.01  | 2.23  | 0.77 | 1.00 | No  |
| Bacteria | Proteobacteria | Deltaproteobacteria   | Desulfovibrionales   | Desulfovibrionaceae  | Desulfovibrio      | 0.20   | 0.31 | 0.38   | -2.93  | 3.68  | 0.82 | 1.00 | -0.48  | -2.61  | 1.66  | 0.66 | 1.00 | No  |
| Bacteria | Proteobacteria | Deltaproteobacteria   | Desulfovibrionales   | Desulfovibrionaceae  |                    | 9.07%  | -    | 3.25   | -0.28  | 6.79  | 0.07 | 0.99 | 2.10   | -0.18  | 4.39  | 0.07 | 1.00 | Yes |
| Bacteria | Proteobacteria | Deltaproteobacteria   | Desulfuromonadales   | Geobacteraceae       | Geobacter          | 2.59%  | -    | -4.30  | -10.59 | 1.99  | 0.18 | 1.00 | -3.36  | -7.43  | 0.70  | 0.10 | 1.00 | Yes |
| Bacteria | Proteobacteria | Deltaproteobacteria   | Desulfuromonadales   | Geobacteraceae       |                    | 0.60%  | -    | 9.80   | -3.20  | 22.80 | 0.14 | 1.00 | 5.09   | -3.32  | 13.49 | 0.24 | 1.00 | Yes |
| Bacteria | Proteobacteria | Deltaproteobacteria   | FAC87                |                      |                    | 0.10%  | -    | 13.40  | -18.19 | 45.00 | 0.41 | 1.00 | 17.50  | -2.89  | 37.90 | 0.09 | 1.00 | Yes |
| Bacteria | Proteobacteria | Deltaproteobacteria   | GMD14H09             |                      |                    | 4.69%  | -    | -0.84  | -5.70  | 4.03  | 0.74 | 1.00 | -2.08  | -5.22  | 1.06  | 0.19 | 1.00 | Yes |
| Bacteria | Proteobacteria | Deltaproteobacteria   | MBNT15               |                      |                    | 0.40%  | -    | -14.50 | -30.33 | 1.34  | 0.07 | 0.99 | -3.96  | -14.21 | 6.29  | 0.45 | 1.00 | Yes |
| Bacteria | Proteobacteria | Deltaproteobacteria   | MIZ46                |                      |                    | 0.10%  | -    | -14.09 | -45.74 | 17.56 | 0.38 | 1.00 | -7.82  | -28.28 | 12.64 | 0.45 | 1.00 | Yes |
| Bacteria | Proteobacteria | Deltaproteobacteria   | Myxococcales         | Cystobacterineae     |                    | 0.20%  | -    | -21.56 | -43.95 | 0.83  | 0.06 | 0.99 | -15.75 | -30.21 | -1.29 | 0.03 | 1.00 | Yes |
| Bacteria | Proteobacteria | Deltaproteobacteria   | Myxococcales         | Haliangiaceae        | Haliangium         | 0.20%  | -    | -13.60 | -36.05 | 8.86  | 0.23 | 1.00 | -6.73  | -21.25 | 7.78  | 0.36 | 1.00 | Yes |
| Bacteria | Proteobacteria | Deltaproteobacteria   | Myxococcales         | Haliangiaceae        |                    | 1.89%  | -    | -0.66  | -8.13  | 6.82  | 0.86 | 1.00 | 0.88   | -3.95  | 5.71  | 0.72 | 1.00 | Yes |
| Bacteria | Proteobacteria | Deltaproteobacteria   | Myxococcales         | Myxococcaceae        | Anaeromyxobacter   | 0.10%  | -    | -6.46  | -38.54 | 25.62 | 0.69 | 1.00 | 5.39   | -15.35 | 26.12 | 0.61 | 1.00 | Yes |
| Bacteria | Proteobacteria | Deltaproteobacteria   | Myxococcales         | Myxococcaceae        |                    | 0.70%  | -    | 1.93   | -10.20 | 14.06 | 0.76 | 1.00 | 2.18   | -5.65  | 10.02 | 0.58 | 1.00 | Yes |
| Bacteria | Proteobacteria | Deltaproteobacteria   | Myxococcales         | Nannocystaceae       | Plesiocystis       | 0.40%  | -    | 3.92   | -12.00 | 19.85 | 0.63 | 1.00 | 10.96  | 0.69   | 21.22 | 0.04 | 1.00 | Yes |
| Bacteria | Proteobacteria | Deltaproteobacteria   | Myxococcales         | OM27                 |                    | 1.20%  | -    | 5.12   | -4.08  | 14.32 | 0.27 | 1.00 | 4.79   | -1.16  | 10.73 | 0.11 | 1.00 | Yes |
| Bacteria | Proteobacteria | Deltaproteobacteria   | Myxococcales         | Other                | Other              | 0.30%  | -    | 7.16   | -11.27 | 25.60 | 0.45 | 1.00 | 5.55   | -6.37  | 17.46 | 0.36 | 1.00 | Yes |
| Bacteria | Proteobacteria | Deltaproteobacteria   | Myxococcales         | Polyangiaceae        | Other              | 0.10%  | -    | -14.09 | -45.74 | 17.56 | 0.38 | 1.00 | -7.82  | -28.28 | 12.64 | 0.45 | 1.00 | Yes |
| Bacteria | Proteobacteria | Deltaproteobacteria   | Myxococcales         | Polyangiaceae        |                    | 1.20%  | -    | 2.61   | -6.68  | 11.89 | 0.58 | 1.00 | 4.29   | -1.71  | 10.29 | 0.16 | 1.00 | Yes |
| Bacteria | Proteobacteria | Deltaproteobacteria   | Myxococcales         |                      |                    | 5.18%  | -    | -1.41  | -5.99  | 3.16  | 0.55 | 1.00 | -2.54  | -5.49  | 0.41  | 0.09 | 1.00 | Yes |
| Bacteria | Proteobacteria | Deltaproteobacteria   | NB1-j                | NB1-i                |                    | 0.40%  | -    | 2.32   | -13.52 | 18.16 | 0.77 | 1.00 | 6.14   | -4.09  | 16.36 | 0.24 | 1.00 | Yes |
| Bacteria | Proteobacteria | Deltaproteobacteria   | NB1-j                |                      |                    | 0.30%  | -    | 8.10   | -10.21 | 26.41 | 0.39 | 1.00 | -1.89  | -13.73 | 9.95  | 0.75 | 1.00 | Yes |
| Bacteria | Proteobacteria | Deltaproteobacteria   | Other                | Other                | Other              | 0.10%  | -    | -10.97 | -42.66 | 20.71 | 0.50 | 1.00 | -3.93  | -24.40 | 16.55 | 0.71 | 1.00 | Yes |
| Bacteria | Proteobacteria | Deltaproteobacteria   | Spirobaillales       |                      |                    | 0.80%  | -    | 1.10   | -10.19 | 12.38 | 0.85 | 1.00 | 1.23   | -6.05  | 8.52  | 0.74 | 1.00 | Yes |
| Bacteria | Proteobacteria | Deltaproteobacteria   | Syntrophobacteriales | Syntrophaceae        | Syntrophus         | 0.20%  | -    | 1.38   | -21.19 | 23.94 | 0.90 | 1.00 | -0.80  | -15.39 | 13.78 | 0.91 | 1.00 | Yes |
| Bacteria | Proteobacteria | Deltaproteobacteria   | Syntrophobacteriales | Syntrophaceae        |                    | 0.10%  | -    | 46.11  | 14.51  | 77.70 | 0.00 | 0.99 | 26.34  | 5.90   | 46.78 | 0.01 | 0.88 | Yes |
| Bacteria | Proteobacteria | Deltaproteobacteria   | Syntrophobacteriales | Syntrophobacteraceae | Syntrophobacter    | 0.50%  | -    | -3.11  | -17.30 | 11.08 | 0.67 | 1.00 | 2.44   | -6.73  | 11.61 | 0.60 | 1.00 | Yes |
| Bacteria | Proteobacteria | Deltaproteobacteria   | Syntrophobacteriales | Syntrophobacteraceae |                    | 3.29%  | -    | -1.52  | -7.12  | 4.09  | 0.60 | 1.00 | -0.43  | -4.05  | 3.19  | 0.82 | 1.00 | Yes |
| Bacteria | Proteobacteria | Deltaproteobacteria   |                      |                      |                    | 0.50%  | -    | -1.25  | -15.43 | 12.94 | 0.86 | 1.00 | -1.41  | -10.57 | 7.76  | 0.76 | 1.00 | Yes |
| Bacteria | Proteobacteria | Epsilonproteobacteria | Campylobacterales    | Campylobacteraceae   | Arcobacter         | 5.08%  | -    | 2.87   | -1.72  | 7.46  | 0.22 | 1.00 | 3.03   | 0.06   | 5.99  | 0.05 | 1.00 | Yes |
| Bacteria | Proteobacteria | Epsilonproteobacteria | Campylobacterales    | Campylobacteraceae   | Campylobacter      | 3.49%  | -    | -2.30  | -7.77  | 3.16  | 0.41 | 1.00 | 0.56   | -2.97  | 4.09  | 0.76 | 1.00 | Yes |
| Bacteria | Proteobacteria | Epsilonproteobacteria | Campylobacterales    | Campylobacteraceae   | Sulfurospirillum   | 0.10%  | -    | 29.92  | -1.74  | 61.58 | 0.06 | 0.99 | 15.88  | -4.59  | 36.35 | 0.13 | 1.00 | Yes |
| Bacteria | Proteobacteria | Epsilonproteobacteria | Campylobacterales    | Campylobacteraceae   |                    | 1.40%  | -    | 0.93   | -7.62  | 9.49  | 0.83 | 1.00 | -1.17  | -6.70  | 4.36  | 0.68 | 1.00 | Yes |
| Bacteria | Proteobacteria | Epsilonproteobacteria | Campylobacterales    | Helicobacteraceae    | Flexispira         | 1.10%  | -    | 1.34   | -8.25  | 10.93 | 0.78 | 1.00 | -3.44  | -9.63  | 2.75  | 0.28 | 1.00 | Yes |
| Bacteria | Proteobacteria | Epsilonproteobacteria | Campylobacterales    | Helicobacteraceae    | Helicobacter       | 2.59%  | -    | -5.13  | -11.49 | 1.23  | 0.11 | 1.00 | -1.37  | -5.49  | 2.74  | 0.51 | 1.00 | Yes |
| Bacteria | Proteobacteria | Epsilonproteobacteria | Campylobacterales    | Helicobacteraceae    | Other              | 1.10%  | -    | 1.96   | -7.75  | 11.67 | 0.69 | 1.00 | 1.09   | -5.19  | 7.37  | 0.73 | 1.00 | Yes |
| Bacteria | Proteobacteria | Epsilonproteobacteria | Campylobacterales    | Helicobacteraceae    | Sulfuricurvum      | 3.99%  | -    | 2.03   | -3.16  | 7.22  | 0.44 | 1.00 | 0.21   | -3.14  | 3.57  | 0.90 | 1.00 | Yes |
| Bacteria | Proteobacteria | Epsilonproteobacteria | Campylobacterales    | Helicobacteraceae    | Sulfurimonas       | 0.70%  | -    | 2.56   | -9.54  | 14.66 | 0.68 | 1.00 | 1.29   | -6.52  | 9.11  | 0.75 | 1.00 | Yes |
| Bacteria | Proteobacteria | Epsilonproteobacteria | Campylobacterales    | Helicobacteraceae    |                    | 5.48%  | -    | -0.12  | -4.61  | 4.38  | 0.96 | 1.00 | -0.44  | -3.34  | 2.47  | 0.77 | 1.00 | Yes |
| Bacteria | Proteobacteria | Gammaproteobacteria   | [Marinicellales]     | [Marinicellaceae]    | Marinicella        | 0.30%  | -    | -12.73 | -30.99 | 5.54  | 0.17 | 1.00 | -9.54  | -21.34 | 2.26  | 0.11 | 1.00 | Yes |
| Bacteria | Proteobacteria | Gammaproteobacteria   | [Marinicellales]     | [Marinicellaceae]    |                    | 0.80%  | -    | -1.29  | -12.61 | 10.03 | 0.82 | 1.00 | -2.72  | -10.03 | 4.59  | 0.47 | 1.00 | Yes |
| Bacteria | Proteobacteria | Gammaproteobacteria   | Aeromonadales        | Aeromonadaceae       | Tolomonas          | 0.60%  | -    | 3.32   | -9.58  | 16.22 | 0.61 | 1.00 | 0.96   | -7.37  | 9.30  | 0.82 | 1.00 | Yes |
| Bacteria | Proteobacteria | Gammaproteobacteria   | Aeromonadales        | Aeromonadaceae       |                    | 6.98%  | -    | 2.09   | -1.93  | 6.12  | 0.31 | 1.00 | 0.93   | -1.67  | 3.53  | 0.48 | 1.00 | Yes |
| Bacteria | Proteobacteria | Gammaproteobacteria   | Aeromonadales        | Succinivibrionaceae  | Anaerobiospirillum | 0.10%  | -    | -11.71 | -43.55 | 20.13 | 0.47 | 1.00 | -12.28 | -32.84 | 8.29  | 0.24 | 1.00 | Yes |
| Bacteria | Proteobacteria | Gammaproteobacteria   | Aeromonadales        | Succinivibrionaceae  | Ruminobacter       | 0.30%  | -    | -7.92  | -26.22 | 10.37 | 0.40 | 1.00 | -2.41  | -14.23 | 9.42  | 0.69 | 1.00 | Yes |
| Bacteria | Proteobacteria | Gammaproteobacteria   | Aeromonadales        | Succinivibrionaceae  | Succinivibrio      | 16.25% | -    | 1.66   | -1.11  | 4.43  | 0.24 | 1.00 | 1.03   | -0.76  | 2.82  | 0.26 | 1.00 | Yes |
| Bacteria | Proteobacteria | Gammaproteobacteria   | Aeromonadales        | Succinivibrionaceae  |                    | 1.40%  | -    | -3.90  | -12.42 | 4.62  | 0.37 | 1.00 | -1.10  | -6.60  | 4.41  | 0.70 | 1.00 | Yes |
| Bacteria | Proteobacteria | Gammaproteobacteria   | Alteromonadales      | [Chromatiaceae]      | Alkalimonas        | 0.10%  | -    | -17.65 | -49.27 | 13.96 | 0.27 | 1.00 | -4.08  | -24.52 | 16.36 | 0.70 | 1.00 | Yes |

|          |                |                     |                   |                        |                       |        |      |        |        |       |      |      |        |        |       |      |      |     |
|----------|----------------|---------------------|-------------------|------------------------|-----------------------|--------|------|--------|--------|-------|------|------|--------|--------|-------|------|------|-----|
| Bacteria | Proteobacteria | Gammaproteobacteria | Alteromonadales   | [Chromatiaceae]        | Other                 | 0.20%  | -    | -15.01 | -37.48 | 7.47  | 0.19 | 1.00 | -3.62  | -18.15 | 10.92 | 0.63 | 1.00 | Yes |
| Bacteria | Proteobacteria | Gammaproteobacteria | Alteromonadales   | [Chromatiaceae]        | Rheinheimera          | 1.40%  | -    | 0.35   | -8.17  | 8.87  | 0.94 | 1.00 | 1.55   | -3.96  | 7.05  | 0.58 | 1.00 | Yes |
| Bacteria | Proteobacteria | Gammaproteobacteria | Alteromonadales   | [Chromatiaceae]        |                       | 0.60%  | -    | -3.34  | -16.41 | 9.73  | 0.62 | 1.00 | -0.94  | -9.39  | 7.51  | 0.83 | 1.00 | Yes |
| Bacteria | Proteobacteria | Gammaproteobacteria | Alteromonadales   | 125ds10                |                       | 0.30%  | -    | 6.32   | -12.02 | 24.65 | 0.50 | 1.00 | 9.10   | -2.74  | 20.94 | 0.13 | 1.00 | Yes |
| Bacteria | Proteobacteria | Gammaproteobacteria | Alteromonadales   | 211ds20                |                       | 0.30%  | -    | -4.41  | -22.85 | 14.03 | 0.64 | 1.00 | -6.63  | -18.54 | 5.28  | 0.27 | 1.00 | Yes |
| Bacteria | Proteobacteria | Gammaproteobacteria | Alteromonadales   | Alteromonadaceae       | Agarivorans           | 0.20%  | -    | -6.42  | -28.85 | 16.01 | 0.57 | 1.00 | -2.84  | -17.34 | 11.65 | 0.70 | 1.00 | Yes |
| Bacteria | Proteobacteria | Gammaproteobacteria | Alteromonadales   | Alteromonadaceae       | Alteromonas           | 2.69%  | -    | 0.26   | -5.99  | 6.52  | 0.93 | 1.00 | -1.74  | -5.78  | 2.30  | 0.40 | 1.00 | Yes |
| Bacteria | Proteobacteria | Gammaproteobacteria | Alteromonadales   | Alteromonadaceae       | BD2-13                | 0.10%  | -    | -6.04  | -37.71 | 25.64 | 0.71 | 1.00 | -8.10  | -28.56 | 12.37 | 0.44 | 1.00 | Yes |
| Bacteria | Proteobacteria | Gammaproteobacteria | Alteromonadales   | Alteromonadaceae       | Candidatus Endobugula | 2.29%  | -    | 0.47   | -6.38  | 7.33  | 0.89 | 1.00 | 0.48   | -3.95  | 4.91  | 0.83 | 1.00 | Yes |
| Bacteria | Proteobacteria | Gammaproteobacteria | Alteromonadales   | Alteromonadaceae       | Cellvibrio            | 1.79%  | -    | -0.70  | -8.25  | 6.85  | 0.86 | 1.00 | -1.95  | -6.83  | 2.93  | 0.43 | 1.00 | Yes |
| Bacteria | Proteobacteria | Gammaproteobacteria | Alteromonadales   | Alteromonadaceae       | Glaciecola            | 1.69%  | -    | -3.83  | -11.63 | 3.98  | 0.34 | 1.00 | -1.62  | -6.67  | 3.42  | 0.53 | 1.00 | Yes |
| Bacteria | Proteobacteria | Gammaproteobacteria | Alteromonadales   | Alteromonadaceae       | Marinimicrobium       | 0.50%  | -    | -3.17  | -17.47 | 11.13 | 0.66 | 1.00 | -2.26  | -11.50 | 6.98  | 0.63 | 1.00 | Yes |
| Bacteria | Proteobacteria | Gammaproteobacteria | Alteromonadales   | Alteromonadaceae       | Marinobacter          | 8.28%  | -    | -0.38  | -4.10  | 3.35  | 0.84 | 1.00 | 0.14   | -2.27  | 2.54  | 0.91 | 1.00 | Yes |
| Bacteria | Proteobacteria | Gammaproteobacteria | Alteromonadales   | Alteromonadaceae       | Microbulbifer         | 1.40%  | -    | 1.88   | -6.81  | 10.56 | 0.67 | 1.00 | 1.97   | -3.64  | 7.58  | 0.49 | 1.00 | Yes |
| Bacteria | Proteobacteria | Gammaproteobacteria | Alteromonadales   | Alteromonadaceae       | Other                 | 0.60%  | -    | -5.40  | -18.42 | 7.61  | 0.42 | 1.00 | -3.97  | -12.38 | 4.45  | 0.36 | 1.00 | Yes |
| Bacteria | Proteobacteria | Gammaproteobacteria | Alteromonadales   | Alteromonadaceae       |                       | 1.99%  | -    | -0.26  | -7.51  | 6.99  | 0.94 | 1.00 | -1.67  | -6.36  | 3.01  | 0.48 | 1.00 | Yes |
| Bacteria | Proteobacteria | Gammaproteobacteria | Alteromonadales   | Colwelliaceae          | Thalassomonas         | 0.10%  | -    | 3.77   | -27.94 | 35.49 | 0.82 | 1.00 | 10.37  | -10.11 | 30.86 | 0.32 | 1.00 | Yes |
| Bacteria | Proteobacteria | Gammaproteobacteria | Alteromonadales   | Colwelliaceae          |                       | 0.80%  | -    | -5.51  | -16.73 | 5.70  | 0.33 | 1.00 | -1.98  | -9.23  | 5.28  | 0.59 | 1.00 | Yes |
| Bacteria | Proteobacteria | Gammaproteobacteria | Alteromonadales   | HTCC2188               | HTCC                  | 0.70%  | -    | -5.66  | -17.68 | 6.37  | 0.36 | 1.00 | -4.95  | -12.72 | 2.82  | 0.21 | 1.00 | Yes |
| Bacteria | Proteobacteria | Gammaproteobacteria | Alteromonadales   | HTCC2188               |                       | 0.20%  | -    | -5.01  | -27.57 | 17.55 | 0.66 | 1.00 | -6.67  | -21.24 | 7.91  | 0.37 | 1.00 | Yes |
| Bacteria | Proteobacteria | Gammaproteobacteria | Alteromonadales   | Idiomarinaceae         | Idiomarina            | 1.10%  | -    | -3.56  | -13.21 | 6.09  | 0.47 | 1.00 | -4.48  | -10.72 | 1.75  | 0.16 | 1.00 | Yes |
| Bacteria | Proteobacteria | Gammaproteobacteria | Alteromonadales   | Idiomarinaceae         | Pseudidiomarina       | 0.50%  | -    | -2.73  | -16.99 | 11.53 | 0.71 | 1.00 | -4.61  | -13.82 | 4.61  | 0.33 | 1.00 | Yes |
| Bacteria | Proteobacteria | Gammaproteobacteria | Alteromonadales   | Idiomarinaceae         |                       | 2.19%  | -    | -2.62  | -9.58  | 4.34  | 0.46 | 1.00 | -1.42  | -5.92  | 3.08  | 0.54 | 1.00 | Yes |
| Bacteria | Proteobacteria | Gammaproteobacteria | Alteromonadales   | Moritellaceae          | Moritella             | 0.20%  | -    | 9.32   | -13.03 | 31.67 | 0.41 | 1.00 | 8.90   | -5.53  | 23.34 | 0.23 | 1.00 | Yes |
| Bacteria | Proteobacteria | Gammaproteobacteria | Alteromonadales   | OM60                   |                       | 2.89%  | -    | -1.03  | -7.01  | 4.95  | 0.73 | 1.00 | 1.23   | -2.64  | 5.09  | 0.53 | 1.00 | Yes |
| Bacteria | Proteobacteria | Gammaproteobacteria | Alteromonadales   | Psychromonadaceae      | Psychromonas          | 1.10%  | -    | 0.18   | -9.52  | 9.89  | 0.97 | 1.00 | 4.14   | -2.13  | 10.40 | 0.20 | 1.00 | Yes |
| Bacteria | Proteobacteria | Gammaproteobacteria | Alteromonadales   | Psychromonadaceae      |                       | 0.20%  | -    | 3.29   | -19.33 | 25.92 | 0.78 | 1.00 | 2.21   | -12.42 | 16.83 | 0.77 | 1.00 | Yes |
| Bacteria | Proteobacteria | Gammaproteobacteria | Alteromonadales   | Shewanellaceae         | Shewanella            | 4.49%  | -    | -5.61  | -10.53 | -0.70 | 0.03 | 0.99 | -2.49  | -5.67  | 0.69  | 0.12 | 1.00 | Yes |
| Bacteria | Proteobacteria | Gammaproteobacteria | Alteromonadales   |                        |                       | 0.70%  | -    | -0.49  | -12.56 | 11.57 | 0.94 | 1.00 | -1.45  | -9.24  | 6.35  | 0.72 | 1.00 | Yes |
| Bacteria | Proteobacteria | Gammaproteobacteria | Cardiobacteriales | Cardiobacteriaceae     | Cardiobacterium       | 5.58%  | -    | 0.86   | -3.50  | 5.21  | 0.70 | 1.00 | 0.95   | -1.87  | 3.76  | 0.51 | 1.00 | Yes |
| Bacteria | Proteobacteria | Gammaproteobacteria | Chromatiales      | Ectothiorhodospiraceae | Halorhodospira        | 0.20%  | -    | -13.60 | -36.05 | 8.86  | 0.23 | 1.00 | -6.73  | -21.25 | 7.78  | 0.36 | 1.00 | Yes |
| Bacteria | Proteobacteria | Gammaproteobacteria | Chromatiales      | Ectothiorhodospiraceae | Other                 | 0.40%  | -    | -0.70  | -16.60 | 15.19 | 0.93 | 1.00 | -0.05  | -10.32 | 10.22 | 0.99 | 1.00 | Yes |
| Bacteria | Proteobacteria | Gammaproteobacteria | Chromatiales      | Halothiobacillaceae    | Thiovirga             | 1.10%  | -    | -1.51  | -11.16 | 8.14  | 0.76 | 1.00 | -0.57  | -6.81  | 5.66  | 0.86 | 1.00 | Yes |
| Bacteria | Proteobacteria | Gammaproteobacteria | Chromatiales      | Other                  | Other                 | 0.40%  | -    | 1.07   | -14.84 | 16.97 | 0.90 | 1.00 | 0.76   | -9.52  | 11.03 | 0.89 | 1.00 | Yes |
| Bacteria | Proteobacteria | Gammaproteobacteria | Chromatiales      |                        |                       | 0.50%  | -    | -3.26  | -17.43 | 10.90 | 0.65 | 1.00 | 0.10   | -9.06  | 9.25  | 0.98 | 1.00 | Yes |
| Bacteria | Proteobacteria | Gammaproteobacteria | Enterobacteriales | Enterobacteriaceae     | Buchnera              | 3.39%  | -    | 5.06   | -0.47  | 10.59 | 0.07 | 0.99 | 0.02   | -3.56  | 3.60  | 0.99 | 1.00 | Yes |
| Bacteria | Proteobacteria | Gammaproteobacteria | Enterobacteriales | Enterobacteriaceae     | Citrobacter           | 1.50%  | -    | 7.20   | -1.11  | 15.51 | 0.09 | 1.00 | 1.67   | -3.70  | 7.05  | 0.54 | 1.00 | Yes |
| Bacteria | Proteobacteria | Gammaproteobacteria | Enterobacteriales | Enterobacteriaceae     | Escherichia           | 0.13   | 0.24 | 4.20   | -0.03  | 8.43  | 0.05 | 0.99 | 2.25   | -0.49  | 4.98  | 0.11 | 1.00 | No  |
| Bacteria | Proteobacteria | Gammaproteobacteria | Enterobacteriales | Enterobacteriaceae     | Klebsiella            | 1.60%  | -    | 2.60   | -5.40  | 10.59 | 0.52 | 1.00 | 0.11   | -5.05  | 5.28  | 0.97 | 1.00 | Yes |
| Bacteria | Proteobacteria | Gammaproteobacteria | Enterobacteriales | Enterobacteriaceae     | Other*                | 0.70   | 0.56 | 0.65   | -1.27  | 2.57  | 0.51 | 1.00 | -0.23  | -1.47  | 1.02  | 0.72 | 1.00 | No  |
| Bacteria | Proteobacteria | Gammaproteobacteria | Enterobacteriales | Enterobacteriaceae     | Plesiomonas           | 0.20%  | -    | -18.81 | -41.21 | 3.59  | 0.10 | 1.00 | -3.64  | -18.14 | 10.85 | 0.62 | 1.00 | Yes |
| Bacteria | Proteobacteria | Gammaproteobacteria | Enterobacteriales | Enterobacteriaceae     | Proteus               | 5.78%  | -    | -0.22  | -4.50  | 4.05  | 0.92 | 1.00 | 0.48   | -2.28  | 3.24  | 0.73 | 1.00 | Yes |
| Bacteria | Proteobacteria | Gammaproteobacteria | Enterobacteriales | Enterobacteriaceae     | Providencia           | 0.30%  | -    | 10.28  | -8.12  | 28.69 | 0.27 | 1.00 | 9.26   | -2.63  | 21.15 | 0.13 | 1.00 | Yes |
| Bacteria | Proteobacteria | Gammaproteobacteria | Enterobacteriales | Enterobacteriaceae     | Serratia*             | 0.36   | 0.47 | 0.69   | -1.55  | 2.94  | 0.54 | 1.00 | -0.37  | -1.82  | 1.08  | 0.61 | 1.00 | No  |
| Bacteria | Proteobacteria | Gammaproteobacteria | Enterobacteriales | Enterobacteriaceae     | Trabulsilla           | 0.30%  | -    | -7.47  | -25.72 | 10.79 | 0.42 | 1.00 | -4.39  | -16.19 | 7.41  | 0.47 | 1.00 | Yes |
| Bacteria | Proteobacteria | Gammaproteobacteria | Enterobacteriales | Enterobacteriaceae*    |                       | 2.48   | 0.59 | 2.45   | 0.70   | 4.20  | 0.01 | 0.99 | 0.60   | -0.53  | 1.73  | 0.30 | 1.00 | No  |
| Bacteria | Proteobacteria | Gammaproteobacteria | HOC36             |                        |                       | 1.99%  | -    | 1.95   | -5.22  | 9.11  | 0.59 | 1.00 | -1.02  | -5.65  | 3.61  | 0.66 | 1.00 | Yes |
| Bacteria | Proteobacteria | Gammaproteobacteria | HTCC2188          | HTCC2089               |                       | 0.20%  | -    | -13.60 | -36.05 | 8.86  | 0.23 | 1.00 | -6.73  | -21.25 | 7.78  | 0.36 | 1.00 | Yes |
| Bacteria | Proteobacteria | Gammaproteobacteria | Legionellales     | Coxiellaceae           | Aquicella             | 0.20%  | -    | -5.67  | -27.98 | 16.64 | 0.62 | 1.00 | 3.59   | -10.83 | 18.00 | 0.63 | 1.00 | Yes |
| Bacteria | Proteobacteria | Gammaproteobacteria | Legionellales     | Coxiellaceae           | Rickettsiella         | 0.20%  | -    | 0.67   | -21.71 | 23.05 | 0.95 | 1.00 | -3.11  | -17.57 | 11.35 | 0.67 | 1.00 | Yes |
| Bacteria | Proteobacteria | Gammaproteobacteria | Legionellales     | Coxiellaceae           |                       | 0.30%  | -    | -11.69 | -30.11 | 6.72  | 0.21 | 1.00 | -7.26  | -19.17 | 4.64  | 0.23 | 1.00 | Yes |
| Bacteria | Proteobacteria | Gammaproteobacteria | Legionellales     | Francisellaceae        |                       | 0.50%  | -    | -3.90  | -18.20 | 10.40 | 0.59 | 1.00 | -4.09  | -13.33 | 5.15  | 0.39 | 1.00 | Yes |
| Bacteria | Proteobacteria | Gammaproteobacteria | Legionellales     | Legionellaceae         | Legionella            | 0.50%  | -    | 2.93   | -11.30 | 17.16 | 0.69 | 1.00 | 6.15   | -3.03  | 15.34 | 0.19 | 1.00 | Yes |
| Bacteria | Proteobacteria | Gammaproteobacteria | Legionellales     |                        |                       | 1.60%  | -    | -0.66  | -8.67  | 7.35  | 0.87 | 1.00 | -3.60  | -8.77  | 1.57  | 0.17 | 1.00 | Yes |
| Bacteria | Proteobacteria | Gammaproteobacteria | Methylococcales   | Crenotrichaceae        | Crenothrix            | 2.79%  | -    | -2.69  | -8.85  | 3.46  | 0.39 | 1.00 | -3.93  | -7.90  | 0.04  | 0.05 | 1.00 | Yes |
| Bacteria | Proteobacteria | Gammaproteobacteria | Methylococcales   | Methylococcaceae       | Methylocaldum         | 0.40%  | -    | 19.51  | 3.67   | 35.34 | 0.02 | 0.99 | 1.26   | -9.00  | 11.52 | 0.81 | 1.00 | Yes |
| Bacteria | Proteobacteria | Gammaproteobacteria | Methylococcales   | Methylococcaceae       | Methylomonas          | 0.30%  | -    | 0.60   | -17.70 | 18.91 | 0.95 | 1.00 | -6.57  | -18.40 | 5.25  | 0.28 | 1.00 | Yes |
| Bacteria | Proteobacteria | Gammaproteobacteria | Methylococcales   | Methylococcaceae       | Other                 | 0.40%  | -    | 1.87   | -14.10 | 17.83 | 0.82 | 1.00 | 3.86   | -6.45  | 14.17 | 0.46 | 1.00 | Yes |
| Bacteria | Proteobacteria | Gammaproteobacteria | Methylococcales   |                        |                       | 0.10%  | -    | -29.27 | -60.94 | 2.40  | 0.07 | 0.99 | -4.67  | -25.17 | 15.83 | 0.65 | 1.00 | Yes |
| Bacteria | Proteobacteria | Gammaproteobacteria | Oceanospirillales | Alcanivoracaceae       | Alcanivorax           | 1.40%  | -    | -3.11  | -11.73 | 5.51  | 0.48 | 1.00 | -4.87  | -10.44 | 0.69  | 0.09 | 1.00 | Yes |
| Bacteria | Proteobacteria | Gammaproteobacteria | Oceanospirillales | Halomonadaceae         | Candidatus Portiera   | 1.40%  | -    | -4.36  | -13.10 | 4.38  | 0.33 | 1.00 | -3.06  | -8.71  | 2.59  | 0.29 | 1.00 | Yes |
| Bacteria | Proteobacteria | Gammaproteobacteria | Oceanospirillales | Halomonadaceae         | Chromohalobacter      | 1.20%  | -    | -2.43  | -11.73 | 6.88  | 0.61 | 1.00 | -0.94  | -6.95  | 5.08  | 0.76 | 1.00 | Yes |
| Bacteria | Proteobacteria | Gammaproteobacteria | Oceanospirillales | Halomonadaceae         | Cobetia               | 0.10%  | -    | -18.81 | -50.48 | 12.86 | 0.24 | 1.00 | -3.25  | -23.73 | 17.23 | 0.76 | 1.00 | Yes |
| Bacteria | Proteobacteria | Gammaproteobacteria | Oceanospirillales | Halomonadaceae         | Haererehalobacter     | 0.90%  | -    | 4.28   | -6.41  | 14.97 | 0.43 | 1.00 | 4.57   | -2.34  | 11.47 | 0.19 | 1.00 | Yes |
| Bacteria | Proteobacteria | Gammaproteobacteria | Oceanospirillales | Halomonadaceae         | Halomonas             | 21.14% | -    | -0.34  | -2.85  | 2.17  | 0.79 | 1.00 | -0.49  | -2.11  | 1.13  | 0.55 | 1.00 | Yes |
| Bacteria | Proteobacteria | Gammaproteobacteria | Oceanospirillales | Halomonadaceae         | Other                 | 0.10%  | -    | -11.52 | -43.40 | 20.36 | 0.48 | 1.00 | -13.54 | -34.13 | 7.05  | 0.20 | 1.00 | Yes |
| Bacteria | Proteobacteria | Gammaproteobacteria | Oceanospirillales | Halomonadaceae         |                       | 1.10%  | -    | -0.55  | -10.14 | 9.05  | 0.91 | 1.00 | -0.28  | -6.48  | 5.92  | 0.93 | 1.00 | Yes |
| Bacteria | Proteobacteria | Gammaproteobacteria | Oceanospirillales | Oceanospirillaceae     | Marinobacterium       | 0.30%  | -    | -7.40  | -25.76 | 10.97 | 0.43 | 1.00 | -5.18  | -17.05 | 6.69  | 0.39 | 1.00 | Yes |

|          |                |                     |                   |                         |                   |        |      |        |        |       |      |      |        |        |       |      |      |     |
|----------|----------------|---------------------|-------------------|-------------------------|-------------------|--------|------|--------|--------|-------|------|------|--------|--------|-------|------|------|-----|
| Bacteria | Proteobacteria | Gammaproteobacteria | Oceanospirillales | Oceanospirillaceae      | Marinomonas       | 0.10%  | -    | -18.81 | -50.48 | 12.86 | 0.24 | 1.00 | -3.25  | -23.73 | 17.23 | 0.76 | 1.00 | Yes |
| Bacteria | Proteobacteria | Gammaproteobacteria | Oceanospirillales | Oceanospirillaceae      |                   | 0.10%  | -    | -17.87 | -49.47 | 13.72 | 0.27 | 1.00 | -10.71 | -31.13 | 9.71  | 0.30 | 1.00 | Yes |
| Bacteria | Proteobacteria | Gammaproteobacteria | Oceanospirillales | Saccharospirillaceae    | ML110J-20         | 1.20%  | -    | -0.40  | -9.71  | 8.90  | 0.93 | 1.00 | -1.76  | -7.77  | 4.26  | 0.57 | 1.00 | Yes |
| Bacteria | Proteobacteria | Gammaproteobacteria | Oceanospirillales | Saccharospirillaceae    | Saccharospirillum | 0.90%  | -    | -1.74  | -12.44 | 8.96  | 0.75 | 1.00 | -1.74  | -8.66  | 5.17  | 0.62 | 1.00 | Yes |
| Bacteria | Proteobacteria | Gammaproteobacteria | Oceanospirillales | Saccharospirillaceae    |                   | 1.00%  | -    | -1.56  | -11.78 | 8.66  | 0.76 | 1.00 | -2.44  | -9.04  | 4.17  | 0.47 | 1.00 | Yes |
| Bacteria | Proteobacteria | Gammaproteobacteria | Oceanospirillales | SUP05                   |                   | 0.10%  | -    | 4.79   | -26.82 | 36.39 | 0.77 | 1.00 | 8.45   | -11.97 | 28.87 | 0.42 | 1.00 | Yes |
| Bacteria | Proteobacteria | Gammaproteobacteria | Oceanospirillales |                         |                   | 0.30%  | -    | -12.35 | -30.65 | 5.95  | 0.19 | 1.00 | -1.59  | -13.43 | 10.25 | 0.79 | 1.00 | Yes |
| Bacteria | Proteobacteria | Gammaproteobacteria | Other             | Other                   | Other             | 3.69%  | -    | 2.74   | -2.58  | 8.06  | 0.31 | 1.00 | 1.16   | -2.28  | 4.59  | 0.51 | 1.00 | Yes |
| Bacteria | Proteobacteria | Gammaproteobacteria | Pasteurellales    | Pasteurellaceae         | Actinobacillus    | 10.27% | -    | 2.34   | -0.97  | 5.65  | 0.17 | 1.00 | 0.58   | -1.56  | 2.72  | 0.60 | 1.00 | Yes |
| Bacteria | Proteobacteria | Gammaproteobacteria | Pasteurellales    | Pasteurellaceae         | Aggregatibacter   | 16.45% | -    | -1.71  | -4.42  | 1.00  | 0.22 | 1.00 | -1.11  | -2.86  | 0.65  | 0.22 | 1.00 | Yes |
| Bacteria | Proteobacteria | Gammaproteobacteria | Pasteurellales    | Pasteurellaceae         | Gallibacterium    | 0.20%  | -    | -13.60 | -36.05 | 8.86  | 0.23 | 1.00 | -6.73  | -21.25 | 7.78  | 0.36 | 1.00 | Yes |
| Bacteria | Proteobacteria | Gammaproteobacteria | Pasteurellales    | Pasteurellaceae         | Haemophilus       | 0.28   | 0.38 | 1.11   | -1.55  | 3.77  | 0.41 | 1.00 | 0.54   | -1.18  | 2.26  | 0.54 | 1.00 | No  |
| Bacteria | Proteobacteria | Gammaproteobacteria | Pasteurellales    | Pasteurellaceae         | Mannheimia        | 0.70%  | -    | -3.38  | -15.46 | 8.69  | 0.58 | 1.00 | -1.99  | -9.79  | 5.81  | 0.62 | 1.00 | Yes |
| Bacteria | Proteobacteria | Gammaproteobacteria | Pasteurellales    | Pasteurellaceae         | Other             | 1.40%  | -    | 5.78   | -2.84  | 14.39 | 0.19 | 1.00 | 4.86   | -0.71  | 10.42 | 0.09 | 1.00 | Yes |
| Bacteria | Proteobacteria | Gammaproteobacteria | Pasteurellales    | Pasteurellaceae         | Pasteurella       | 0.20%  | -    | 13.13  | -9.25  | 35.52 | 0.25 | 1.00 | -8.02  | -22.48 | 6.45  | 0.28 | 1.00 | Yes |
| Bacteria | Proteobacteria | Gammaproteobacteria | Pasteurellales    | Pasteurellaceae         |                   | 1.10%  | -    | 0.08   | -9.55  | 9.71  | 0.99 | 1.00 | -4.11  | -10.33 | 2.10  | 0.19 | 1.00 | Yes |
| Bacteria | Proteobacteria | Gammaproteobacteria | Pasteurellales    |                         |                   | 1.10%  | -    | -2.49  | -12.17 | 7.18  | 0.61 | 1.00 | -2.27  | -8.52  | 3.97  | 0.48 | 1.00 | Yes |
| Bacteria | Proteobacteria | Gammaproteobacteria | Pseudomonadales   | Moraxellaceae           | Acinetobacter     | 0.56   | 0.49 | 0.01   | -2.07  | 2.09  | 0.99 | 1.00 | -0.18  | -1.52  | 1.16  | 0.79 | 1.00 | No  |
| Bacteria | Proteobacteria | Gammaproteobacteria | Pseudomonadales   | Moraxellaceae           | Enhydrobacter     | 7.38%  | -    | -2.22  | -6.04  | 1.60  | 0.26 | 1.00 | -0.48  | -2.95  | 1.99  | 0.70 | 1.00 | Yes |
| Bacteria | Proteobacteria | Gammaproteobacteria | Pseudomonadales   | Moraxellaceae           | Moraxella         | 2.69%  | -    | -2.39  | -8.61  | 3.83  | 0.45 | 1.00 | 1.21   | -2.81  | 5.23  | 0.56 | 1.00 | Yes |
| Bacteria | Proteobacteria | Gammaproteobacteria | Pseudomonadales   | Moraxellaceae           | Other             | 0.60%  | -    | -4.15  | -17.26 | 8.95  | 0.53 | 1.00 | -0.32  | -8.79  | 8.15  | 0.94 | 1.00 | Yes |
| Bacteria | Proteobacteria | Gammaproteobacteria | Pseudomonadales   | Moraxellaceae           | Psychrobacter     | 7.08%  | -    | -1.79  | -5.83  | 2.24  | 0.38 | 1.00 | -0.65  | -3.26  | 1.96  | 0.63 | 1.00 | Yes |
| Bacteria | Proteobacteria | Gammaproteobacteria | Pseudomonadales   | Moraxellaceae           |                   | 17.05% | -    | 2.34   | -0.40  | 5.07  | 0.09 | 1.00 | 0.60   | -1.17  | 2.37  | 0.51 | 1.00 | Yes |
| Bacteria | Proteobacteria | Gammaproteobacteria | Pseudomonadales   | Pseudomonadaceae        | Other             | 0.80%  | -    | 3.41   | -7.87  | 14.70 | 0.55 | 1.00 | 2.50   | -4.79  | 9.79  | 0.50 | 1.00 | Yes |
| Bacteria | Proteobacteria | Gammaproteobacteria | Pseudomonadales   | Pseudomonadaceae        | Pseudomonas       | 18.64% | -    | 1.57   | -1.02  | 4.15  | 0.23 | 1.00 | 0.88   | -0.79  | 2.55  | 0.30 | 1.00 | Yes |
| Bacteria | Proteobacteria | Gammaproteobacteria | Pseudomonadales   | Pseudomonadaceae        |                   | 7.78%  | -    | -0.40  | -4.23  | 3.42  | 0.84 | 1.00 | -0.95  | -3.42  | 1.52  | 0.45 | 1.00 | Yes |
| Bacteria | Proteobacteria | Gammaproteobacteria | PYR10d3           |                         |                   | 0.20%  | -    | -9.71  | -32.27 | 12.86 | 0.40 | 1.00 | -10.27 | -24.85 | 4.30  | 0.17 | 1.00 | Yes |
| Bacteria | Proteobacteria | Gammaproteobacteria | Thiotrichales     | Piscirickettsiaceae     | Methylophaga      | 1.99%  | -    | -3.13  | -10.49 | 4.23  | 0.40 | 1.00 | -4.49  | -9.24  | 0.26  | 0.06 | 1.00 | Yes |
| Bacteria | Proteobacteria | Gammaproteobacteria | Thiotrichales     | Piscirickettsiaceae     |                   | 1.99%  | -    | 3.91   | -3.36  | 11.18 | 0.29 | 1.00 | 0.92   | -3.78  | 5.62  | 0.70 | 1.00 | Yes |
| Bacteria | Proteobacteria | Gammaproteobacteria | Thiotrichales     |                         |                   | 0.20%  | -    | 18.08  | -4.29  | 40.46 | 0.11 | 1.00 | 11.51  | -2.95  | 25.97 | 0.12 | 1.00 | Yes |
| Bacteria | Proteobacteria | Gammaproteobacteria | Vibrionales       | Other                   | Other             | 0.30%  | -    | -8.57  | -26.97 | 9.84  | 0.36 | 1.00 | -4.48  | -16.38 | 7.42  | 0.46 | 1.00 | Yes |
| Bacteria | Proteobacteria | Gammaproteobacteria | Vibrionales       | Pseudoalteromonadaceae  | Pseudoalteromonas | 3.09%  | -    | -4.09  | -9.89  | 1.72  | 0.17 | 1.00 | -1.40  | -5.16  | 2.35  | 0.46 | 1.00 | Yes |
| Bacteria | Proteobacteria | Gammaproteobacteria | Vibrionales       | Pseudoalteromonadaceae  |                   | 6.28%  | -    | -1.31  | -5.49  | 2.87  | 0.54 | 1.00 | -0.71  | -3.41  | 1.99  | 0.61 | 1.00 | Yes |
| Bacteria | Proteobacteria | Gammaproteobacteria | Vibrionales       | Vibrionaceae            | Allivibrio        | 0.30%  | -    | 6.20   | -12.08 | 24.48 | 0.51 | 1.00 | -5.07  | -16.88 | 6.74  | 0.40 | 1.00 | Yes |
| Bacteria | Proteobacteria | Gammaproteobacteria | Vibrionales       | Vibrionaceae            | Enterovibrio      | 0.30%  | -    | -9.35  | -27.70 | 9.00  | 0.32 | 1.00 | -9.02  | -20.87 | 2.83  | 0.14 | 1.00 | Yes |
| Bacteria | Proteobacteria | Gammaproteobacteria | Vibrionales       | Vibrionaceae            | Other             | 1.60%  | -    | -2.30  | -10.33 | 5.72  | 0.57 | 1.00 | 1.00   | -4.19  | 6.18  | 0.71 | 1.00 | Yes |
| Bacteria | Proteobacteria | Gammaproteobacteria | Vibrionales       | Vibrionaceae            | Photobacterium    | 1.40%  | -    | -0.14  | -8.65  | 8.38  | 0.97 | 1.00 | 3.06   | -2.43  | 8.56  | 0.27 | 1.00 | Yes |
| Bacteria | Proteobacteria | Gammaproteobacteria | Vibrionales       | Vibrionaceae            | Salinivibrio      | 8.37%  | -    | -1.31  | -4.94  | 2.33  | 0.48 | 1.00 | -0.22  | -2.57  | 2.13  | 0.85 | 1.00 | Yes |
| Bacteria | Proteobacteria | Gammaproteobacteria | Vibrionales       | Vibrionaceae            | Vibrio            | 5.98%  | -    | 0.55   | -3.74  | 4.83  | 0.80 | 1.00 | 0.45   | -2.32  | 3.22  | 0.75 | 1.00 | Yes |
| Bacteria | Proteobacteria | Gammaproteobacteria | Vibrionales       | Vibrionaceae            |                   | 1.20%  | -    | -0.80  | -10.00 | 8.39  | 0.86 | 1.00 | -1.03  | -6.98  | 4.91  | 0.73 | 1.00 | Yes |
| Bacteria | Proteobacteria | Gammaproteobacteria | Xanthomonadales   | Sinobacteraceae         | Nevskia           | 0.20%  | -    | 3.69   | -18.64 | 26.03 | 0.75 | 1.00 | 4.72   | -9.12  | 19.15 | 0.52 | 1.00 | Yes |
| Bacteria | Proteobacteria | Gammaproteobacteria | Xanthomonadales   | Sinobacteraceae         | Steroidobacter    | 2.89%  | -    | 0.23   | -5.83  | 6.28  | 0.94 | 1.00 | 1.19   | -2.72  | 5.10  | 0.55 | 1.00 | Yes |
| Bacteria | Proteobacteria | Gammaproteobacteria | Xanthomonadales   | Sinobacteraceae         |                   | 5.48%  | -    | -2.45  | -6.98  | 2.08  | 0.29 | 1.00 | -1.66  | -4.59  | 1.26  | 0.26 | 1.00 | Yes |
| Bacteria | Proteobacteria | Gammaproteobacteria | Xanthomonadales   | Xanthomonadaceae        | Arenimonas        | 0.40%  | -    | 1.63   | -14.21 | 17.48 | 0.84 | 1.00 | 4.03   | -6.20  | 14.27 | 0.44 | 1.00 | Yes |
| Bacteria | Proteobacteria | Gammaproteobacteria | Xanthomonadales   | Xanthomonadaceae        | Dokdonella        | 3.99%  | -    | -0.07  | -5.27  | 5.13  | 0.98 | 1.00 | -0.87  | -4.23  | 2.50  | 0.61 | 1.00 | Yes |
| Bacteria | Proteobacteria | Gammaproteobacteria | Xanthomonadales   | Xanthomonadaceae        | Ignatzschineria   | 0.10%  | -    | 0.71   | -30.99 | 32.42 | 0.96 | 1.00 | 5.07   | -15.42 | 25.56 | 0.63 | 1.00 | Yes |
| Bacteria | Proteobacteria | Gammaproteobacteria | Xanthomonadales   | Xanthomonadaceae        | Luteibacter       | 0.40%  | -    | -12.37 | -28.20 | 3.47  | 0.13 | 1.00 | -8.24  | -18.47 | 2.00  | 0.11 | 1.00 | Yes |
| Bacteria | Proteobacteria | Gammaproteobacteria | Xanthomonadales   | Xanthomonadaceae        | Luteimonas        | 11.37% | -    | -0.18  | -3.34  | 2.99  | 0.91 | 1.00 | -0.38  | -2.42  | 1.67  | 0.72 | 1.00 | Yes |
| Bacteria | Proteobacteria | Gammaproteobacteria | Xanthomonadales   | Xanthomonadaceae        | Lysobacter        | 6.98%  | -    | 1.77   | -2.17  | 5.72  | 0.38 | 1.00 | 1.17   | -1.38  | 3.72  | 0.37 | 1.00 | Yes |
| Bacteria | Proteobacteria | Gammaproteobacteria | Xanthomonadales   | Xanthomonadaceae        | Other             | 6.18%  | -    | -4.29  | -8.53  | -0.05 | 0.05 | 0.99 | -2.46  | -5.20  | 0.28  | 0.08 | 1.00 | Yes |
| Bacteria | Proteobacteria | Gammaproteobacteria | Xanthomonadales   | Xanthomonadaceae        | Pseudoxanthomonas | 4.19%  | -    | 0.73   | -4.29  | 5.76  | 0.77 | 1.00 | -1.51  | -4.75  | 1.74  | 0.36 | 1.00 | Yes |
| Bacteria | Proteobacteria | Gammaproteobacteria | Xanthomonadales   | Xanthomonadaceae        | Rhodanobacter     | 0.30%  | -    | 7.48   | -10.78 | 25.75 | 0.42 | 1.00 | 1.15   | -10.66 | 12.95 | 0.85 | 1.00 | Yes |
| Bacteria | Proteobacteria | Gammaproteobacteria | Xanthomonadales   | Xanthomonadaceae        | Stenotrophomonas  | 7.98%  | -    | -0.01  | -3.68  | 3.67  | 1.00 | 1.00 | -0.18  | -2.56  | 2.20  | 0.88 | 1.00 | Yes |
| Bacteria | Proteobacteria | Gammaproteobacteria | Xanthomonadales   | Xanthomonadaceae        | Thermomonas       | 15.85% | -    | -1.56  | -4.35  | 1.22  | 0.27 | 1.00 | -1.58  | -3.38  | 0.21  | 0.08 | 1.00 | Yes |
| Bacteria | Proteobacteria | Gammaproteobacteria | Xanthomonadales   | Xanthomonadaceae        | Xanthomonas       | 0.20%  | -    | -13.31 | -35.82 | 9.19  | 0.25 | 1.00 | -5.02  | -19.57 | 9.53  | 0.50 | 1.00 | Yes |
| Bacteria | Proteobacteria | Gammaproteobacteria | Xanthomonadales   | Xanthomonadaceae        |                   | 0.34   | 0.40 | 0.60   | -1.90  | 3.09  | 0.64 | 1.00 | 0.41   | -1.20  | 2.02  | 0.61 | 1.00 | No  |
| Bacteria | Proteobacteria | Gammaproteobacteria |                   |                         |                   | 0.40%  | -    | 0.29   | -15.55 | 16.14 | 0.97 | 1.00 | 2.92   | -7.32  | 13.16 | 0.58 | 1.00 | Yes |
| Bacteria | Proteobacteria | TA18                | CV90              |                         |                   | 0.10%  | -    | 13.40  | -18.19 | 45.00 | 0.41 | 1.00 | 17.50  | -2.89  | 37.90 | 0.09 | 1.00 | Yes |
| Bacteria | Proteobacteria | TA18                | PHOS-HD29         |                         |                   | 0.30%  | -    | -0.34  | -18.60 | 17.93 | 0.97 | 1.00 | 0.25   | -11.56 | 12.05 | 0.97 | 1.00 | Yes |
| Bacteria | Proteobacteria |                     |                   |                         |                   | 0.60%  | -    | 1.85   | -11.17 | 14.86 | 0.78 | 1.00 | -5.50  | -13.90 | 2.90  | 0.20 | 1.00 | Yes |
| Bacteria | Proteobacteria | SBR1093             | VHS-B5-50         |                         |                   | 0.30%  | -    | -7.79  | -26.18 | 10.60 | 0.41 | 1.00 | -6.88  | -18.76 | 5.00  | 0.26 | 1.00 | Yes |
| Bacteria | Spirochaetes   | [Brevinematae]      | [Brevinematales]  | Brevinemataceae         |                   | 0.30%  | -    | -9.75  | -28.25 | 8.76  | 0.30 | 1.00 | -1.69  | -13.65 | 10.28 | 0.78 | 1.00 | Yes |
| Bacteria | Spirochaetes   | Spirochaetes        | Sphaerochaetales  | Sphaerochaetaceae       | Other             | 0.10%  | -    | 22.54  | -9.01  | 54.09 | 0.16 | 1.00 | -7.94  | -28.35 | 12.46 | 0.45 | 1.00 | Yes |
| Bacteria | Spirochaetes   | Spirochaetes        | Sphaerochaetales  | Sphaerochaetaceae       | Sphaerochaeta     | 0.30%  | -    | 15.45  | -2.92  | 33.82 | 0.10 | 1.00 | 1.32   | -10.57 | 13.20 | 0.83 | 1.00 | Yes |
| Bacteria | Spirochaetes   | Spirochaetes        | Spirochaetales    | Spirochaetaceae         | Treponema         | 3.59%  | -    | -1.72  | -7.11  | 3.66  | 0.53 | 1.00 | -2.50  | -5.97  | 0.98  | 0.16 | 1.00 | Yes |
| Bacteria | Spirochaetes   | Spirochaetes        | Spirochaetales    | Spirochaetaceae         |                   | 0.20%  | -    | -8.79  | -31.23 | 13.65 | 0.44 | 1.00 | -3.76  | -18.27 | 10.75 | 0.61 | 1.00 | Yes |
| Bacteria | Synergistetes  | Synergistia         | Synergistales     | Anaerobaculaceae        | Anaerobaculum     | 0.30%  | -    | -9.90  | -28.18 | 8.37  | 0.29 | 1.00 | -4.99  | -16.80 | 6.83  | 0.41 | 1.00 | Yes |
| Bacteria | Synergistetes  | Synergistia         | Synergistales     | Dethiosulfovibrionaceae | HA73              | 0.40%  | -    | -11.15 | -27.06 | 4.76  | 0.17 | 1.00 | -2.30  | -12.59 | 7.99  | 0.66 | 1.00 | Yes |

|            |                 |                     |                      |                         |                         |        |      |        |        |       |      |      |        |        |       |      |      |     |
|------------|-----------------|---------------------|----------------------|-------------------------|-------------------------|--------|------|--------|--------|-------|------|------|--------|--------|-------|------|------|-----|
| Bacteria   | Synergistetes   | Synergistia         | Synergistales        | Dethiosulfovibrionaceae | PD-UASB-13              | 0.20%  | -    | -16.41 | -38.77 | 5.95  | 0.15 | 1.00 | -4.99  | -19.45 | 9.48  | 0.50 | 1.00 | Yes |
| Bacteria   | Synergistetes   | Synergistia         | Synergistales        | Dethiosulfovibrionaceae | Pyramidobacter          | 2.19%  | -    | -1.96  | -8.80  | 4.89  | 0.57 | 1.00 | 0.38   | -4.05  | 4.80  | 0.87 | 1.00 | Yes |
| Bacteria   | Synergistetes   | Synergistia         | Synergistales        | Dethiosulfovibrionaceae | TG5                     | 0.30%  | -    | -6.00  | -24.31 | 12.32 | 0.52 | 1.00 | 4.02   | -7.81  | 15.86 | 0.50 | 1.00 | Yes |
| Bacteria   | Synergistetes   | Synergistia         | Synergistales        | Synergistaceae          | Other                   | 1.00%  | -    | -3.49  | -13.58 | 6.60  | 0.50 | 1.00 | -5.46  | -11.97 | 1.05  | 0.10 | 1.00 | Yes |
| Bacteria   | Synergistetes   | Synergistia         | Synergistales        | Synergistaceae          |                         | 0.60%  | -    | -5.29  | -18.23 | 7.64  | 0.42 | 1.00 | 1.91   | -6.45  | 10.27 | 0.65 | 1.00 | Yes |
| Bacteria   | Synergistetes   | Synergistia         | Synergistales        | Thermovirgaceae         |                         | 0.30%  | -    | -8.43  | -26.71 | 9.86  | 0.37 | 1.00 | -8.19  | -20.00 | 3.62  | 0.17 | 1.00 | Yes |
| Bacteria   | Tenericutes     | CK-1C4-19           |                      |                         |                         | 0.60%  | -    | 8.84   | -4.13  | 21.81 | 0.18 | 1.00 | 4.14   | -4.25  | 12.52 | 0.33 | 1.00 | Yes |
| Bacteria   | Tenericutes     | Mollicutes          | Acholeplasmatales    | Acholeplasmataceae      | Acholeplasma            | 0.50%  | -    | -15.79 | -30.03 | -1.54 | 0.03 | 0.99 | -7.96  | -17.17 | 1.25  | 0.09 | 1.00 | Yes |
| Bacteria   | Tenericutes     | Mollicutes          | Acholeplasmatales    | Acholeplasmataceae      | Other                   | 0.10%  | -    | -14.69 | -46.48 | 17.09 | 0.36 | 1.00 | -3.93  | -24.48 | 16.61 | 0.71 | 1.00 | Yes |
| Bacteria   | Tenericutes     | Mollicutes          | Acholeplasmatales    |                         |                         | 0.20%  | -    | 0.46   | -22.05 | 22.96 | 0.97 | 1.00 | -1.43  | -15.97 | 13.11 | 0.85 | 1.00 | Yes |
| Bacteria   | Tenericutes     | Mollicutes          | Anaeroplasmatales    | Anaeroplasmataceae      | Anaeroplasma            | 3.09%  | -    | -0.05  | -5.82  | 5.72  | 0.99 | 1.00 | -2.50  | -6.23  | 1.22  | 0.19 | 1.00 | Yes |
| Bacteria   | Tenericutes     | Mollicutes          | Anaeroplasmatales    | Anaeroplasmataceae      |                         | 1.50%  | -    | 1.71   | -6.57  | 9.99  | 0.69 | 1.00 | 1.89   | -3.46  | 7.24  | 0.49 | 1.00 | Yes |
| Bacteria   | Tenericutes     | Mollicutes          | Entomoplasmatales    |                         |                         | 1.00%  | -    | 0.61   | -9.46  | 10.67 | 0.91 | 1.00 | -0.56  | -7.06  | 5.95  | 0.87 | 1.00 | Yes |
| Bacteria   | Tenericutes     | Mollicutes          | Mycoplasmatales      | Mycoplasmataceae        | Candidatus Hepatoplasma | 0.20%  | -    | -3.66  | -25.97 | 18.66 | 0.75 | 1.00 | -16.95 | -31.33 | -2.57 | 0.02 | 1.00 | Yes |
| Bacteria   | Tenericutes     | Mollicutes          | Mycoplasmatales      | Mycoplasmataceae        | Mycoplasma              | 3.49%  | -    | -1.69  | -7.18  | 3.80  | 0.55 | 1.00 | 0.65   | -2.90  | 4.19  | 0.72 | 1.00 | Yes |
| Bacteria   | Tenericutes     | Mollicutes          | Mycoplasmatales      | Mycoplasmataceae        | Ureaplasma              | 0.80%  | -    | 5.87   | -5.39  | 17.14 | 0.31 | 1.00 | 0.58   | -6.70  | 7.87  | 0.88 | 1.00 | Yes |
| Bacteria   | Tenericutes     | Mollicutes          | Mycoplasmatales      | Mycoplasmataceae        |                         | 0.10%  | -    | -7.52  | -39.19 | 24.14 | 0.64 | 1.00 | -8.08  | -28.54 | 12.38 | 0.44 | 1.00 | Yes |
| Bacteria   | Tenericutes     | Mollicutes          | RF39†                |                         |                         | 2.02   | 0.58 | -0.54  | -2.30  | 1.23  | 0.55 | 1.00 | -0.56  | -1.70  | 0.58  | 0.33 | 1.00 | No  |
| Bacteria   | Tenericutes     | Mollicutes          | RsaHF231             |                         |                         | 0.50%  | -    | -1.84  | -16.22 | 12.54 | 0.80 | 1.00 | 3.67   | -5.62  | 12.96 | 0.44 | 1.00 | Yes |
| Bacteria   | Tenericutes     | Mollicutes          |                      |                         |                         | 3.89%  | -    | -0.02  | -5.24  | 5.19  | 0.99 | 1.00 | -0.59  | -3.96  | 2.78  | 0.73 | 1.00 | Yes |
| Bacteria   | Tenericutes     | RF3                 | ML615J-28            |                         |                         | 6.48%  | -    | -1.33  | -5.42  | 2.76  | 0.52 | 1.00 | -1.18  | -3.82  | 1.47  | 0.38 | 1.00 | Yes |
| Bacteria   | Thermotogae     | Thermotogae         | Thermotogales        | Thermotogaceae          | Thermotoga              | 0.10%  | -    | -7.75  | -39.37 | 23.87 | 0.63 | 1.00 | -4.37  | -24.81 | 16.06 | 0.67 | 1.00 | Yes |
| Bacteria   | TM6             | SBRH58              |                      |                         |                         | 0.40%  | -    | 6.40   | -9.49  | 22.28 | 0.43 | 1.00 | 9.12   | -1.14  | 19.37 | 0.08 | 1.00 | Yes |
| Bacteria   | TM6             | SJA-4               |                      |                         |                         | 0.40%  | -    | -16.77 | -32.70 | -0.83 | 0.04 | 0.99 | -10.77 | -21.07 | -0.47 | 0.04 | 1.00 | Yes |
| Bacteria   | TM7             | TM7-1               |                      |                         |                         | 0.20%  | -    | -13.60 | -36.05 | 8.86  | 0.23 | 1.00 | -6.73  | -21.25 | 7.78  | 0.36 | 1.00 | Yes |
| Bacteria   | TM7             | TM7-3               | CW040                | F16                     |                         | 5.58%  | -    | -0.54  | -4.95  | 3.87  | 0.81 | 1.00 | 0.44   | -2.42  | 3.29  | 0.76 | 1.00 | Yes |
| Bacteria   | TM7             | TM7-3               | CW040                |                         |                         | 13.16% | -    | 2.39   | -0.57  | 5.36  | 0.11 | 1.00 | 0.79   | -1.12  | 2.71  | 0.42 | 1.00 | Yes |
| Bacteria   | TM7             | TM7-3               | EW055                |                         |                         | 0.90%  | -    | -4.06  | -14.66 | 6.53  | 0.45 | 1.00 | 0.89   | -5.96  | 7.73  | 0.80 | 1.00 | Yes |
| Bacteria   | TM7             | TM7-3               | I025                 | Rs-045                  |                         | 11.86% | -    | 2.70   | -0.39  | 5.78  | 0.09 | 1.00 | 2.21   | 0.21   | 4.20  | 0.03 | 1.00 | Yes |
| Bacteria   | TM7             | TM7-3               | I025                 |                         |                         | 0.90%  | -    | -4.18  | -14.84 | 6.48  | 0.44 | 1.00 | -3.16  | -10.04 | 3.73  | 0.37 | 1.00 | Yes |
| Bacteria   | TM7             | TM7-3               |                      |                         |                         | 0.43   | 0.37 | 1.83   | -0.89  | 4.54  | 0.19 | 1.00 | 0.55   | -1.21  | 2.30  | 0.54 | 1.00 | No  |
| Bacteria   | TM7             |                     |                      |                         |                         | 0.20%  | -    | -13.60 | -36.05 | 8.86  | 0.23 | 1.00 | -6.73  | -21.25 | 7.78  | 0.36 | 1.00 | Yes |
| Bacteria   | TPD-58          |                     |                      |                         |                         | 0.20%  | -    | 1.35   | -21.11 | 23.81 | 0.91 | 1.00 | 3.91   | -10.61 | 18.42 | 0.60 | 1.00 | Yes |
| Bacteria   | Verrucomicrobia | [Methylacidiphilae] | Methylacidiphilales  | LD19                    |                         | 0.10%  | -    | 8.04   | -23.58 | 39.67 | 0.62 | 1.00 | 0.27   | -20.17 | 20.71 | 0.98 | 1.00 | Yes |
| Bacteria   | Verrucomicrobia | [Pedosphaerae]      | [Pedosphaerales]     | [Pedosphaeraeae]        | Pedosphaera             | 0.30%  | -    | 10.09  | -8.37  | 28.55 | 0.28 | 1.00 | -2.48  | -14.42 | 9.45  | 0.68 | 1.00 | Yes |
| Bacteria   | Verrucomicrobia | [Pedosphaerae]      | [Pedosphaerales]     | auto67_4W               |                         | 0.50%  | -    | -5.71  | -19.89 | 8.47  | 0.43 | 1.00 | -2.90  | -12.07 | 6.27  | 0.53 | 1.00 | Yes |
| Bacteria   | Verrucomicrobia | [Pedosphaerae]      | [Pedosphaerales]     | Ellin515                |                         | 1.10%  | -    | 4.24   | -5.44  | 13.92 | 0.39 | 1.00 | 1.51   | -4.75  | 7.76  | 0.64 | 1.00 | Yes |
| Bacteria   | Verrucomicrobia | [Pedosphaerae]      | [Pedosphaerales]     | Ellin517                |                         | 0.50%  | -    | -4.24  | -18.42 | 9.94  | 0.56 | 1.00 | -3.83  | -12.99 | 5.33  | 0.41 | 1.00 | Yes |
| Bacteria   | Verrucomicrobia | [Pedosphaerae]      | [Pedosphaerales]     | OPB35                   |                         | 0.10%  | -    | -12.98 | -44.72 | 18.76 | 0.42 | 1.00 | -5.58  | -26.09 | 14.94 | 0.59 | 1.00 | Yes |
| Bacteria   | Verrucomicrobia | [Pedosphaerae]      | [Pedosphaerales]     | R4-41B                  |                         | 0.50%  | -    | -4.42  | -18.72 | 9.87  | 0.54 | 1.00 | -1.08  | -10.32 | 8.16  | 0.82 | 1.00 | Yes |
| Bacteria   | Verrucomicrobia | [Pedosphaerae]      | [Pedosphaerales]     |                         |                         | 0.50%  | -    | -13.16 | -27.30 | 0.99  | 0.07 | 0.99 | -3.02  | -12.17 | 6.13  | 0.52 | 1.00 | Yes |
| Bacteria   | Verrucomicrobia | [Spartobacteria]    | [Chthoniobacterales] | [Chthoniobacteraceae]   | Candidatus Xiphi        | 0.70%  | -    | -1.14  | -13.18 | 10.91 | 0.85 | 1.00 | -2.20  | -9.98  | 5.59  | 0.58 | 1.00 | Yes |
| Bacteria   | Verrucomicrobia | [Spartobacteria]    | [Chthoniobacterales] | [Chthoniobacteraceae]   | Chthoniobacter          | 0.30%  | -    | 1.38   | -16.95 | 19.70 | 0.88 | 1.00 | -1.79  | -13.63 | 10.05 | 0.77 | 1.00 | Yes |
| Bacteria   | Verrucomicrobia | [Spartobacteria]    | [Chthoniobacterales] | [Chthoniobacteraceae]   | DA101                   | 1.40%  | -    | -1.08  | -9.62  | 7.47  | 0.80 | 1.00 | -2.30  | -7.83  | 3.22  | 0.41 | 1.00 | Yes |
| Bacteria   | Verrucomicrobia | [Spartobacteria]    | [Chthoniobacterales] | [Chthoniobacteraceae]   |                         | 0.20%  | -    | -22.05 | -44.40 | 0.29  | 0.05 | 0.99 | -16.98 | -31.41 | -2.55 | 0.02 | 1.00 | Yes |
| Bacteria   | Verrucomicrobia | Opitutae            | [Cerasicoccales]     | [Cerasicocaceae]        |                         | 0.90%  | -    | -4.07  | -14.83 | 6.69  | 0.46 | 1.00 | -2.61  | -9.57  | 4.34  | 0.46 | 1.00 | Yes |
| Bacteria   | Verrucomicrobia | Opitutae            | Opitiales            | Opitaceae               | Opitutus                | 0.40%  | -    | 7.92   | -7.87  | 23.72 | 0.33 | 1.00 | 7.82   | -2.38  | 18.02 | 0.13 | 1.00 | Yes |
| Bacteria   | Verrucomicrobia | Opitutae            | Opitiales            | Opitaceae               |                         | 0.40%  | -    | 1.21   | -14.83 | 17.24 | 0.88 | 1.00 | 1.86   | -8.50  | 12.22 | 0.72 | 1.00 | Yes |
| Bacteria   | Verrucomicrobia | Verruco-5           | WCHB1-41             | RFP12                   |                         | 2.29%  | -    | 0.69   | -6.15  | 7.53  | 0.84 | 1.00 | -1.98  | -6.40  | 2.43  | 0.38 | 1.00 | Yes |
| Bacteria   | Verrucomicrobia | Verrucomicrobiae    | Verrucomicrobiales   | Verrucomicrobiaceae     | Akkermansia             | 0.98   | 0.75 | -0.52  | -1.90  | 0.86  | 0.46 | 1.00 | 0.08   | -0.81  | 0.97  | 0.86 | 1.00 | No  |
| Bacteria   | Verrucomicrobia | Verrucomicrobiae    | Verrucomicrobiales   | Verrucomicrobiaceae     | Luteolibacter           | 0.40%  | -    | -8.07  | -23.92 | 7.77  | 0.32 | 1.00 | -3.36  | -13.60 | 6.89  | 0.52 | 1.00 | Yes |
| Bacteria   | Verrucomicrobia | Verrucomicrobiae    | Verrucomicrobiales   | Verrucomicrobiaceae     | Prostheco bacter        | 0.20%  | -    | -5.53  | -27.92 | 16.86 | 0.63 | 1.00 | -8.18  | -22.64 | 6.28  | 0.27 | 1.00 | Yes |
| Bacteria   | Verrucomicrobia | Verrucomicrobiae    | Verrucomicrobiales   | Verrucomicrobiaceae     | Verrucomicrobium        | 0.10%  | -    | 13.40  | -18.19 | 45.00 | 0.41 | 1.00 | 17.50  | -2.89  | 37.90 | 0.09 | 1.00 | Yes |
| Bacteria   | Verrucomicrobia | Verrucomicrobiae    | Verrucomicrobiales   | Verrucomicrobiaceae     |                         | 1.50%  | -    | -3.57  | -11.82 | 4.68  | 0.40 | 1.00 | -1.16  | -6.50  | 4.17  | 0.67 | 1.00 | Yes |
| Bacteria   | WPS-2           |                     |                      |                         |                         | 1.30%  | -    | 2.71   | -6.17  | 11.60 | 0.55 | 1.00 | 2.94   | -2.80  | 8.68  | 0.32 | 1.00 | Yes |
| Bacteria   | WS3             | PRR-12              | LD1-PA13             |                         |                         | 0.40%  | -    | 4.41   | -11.46 | 20.28 | 0.59 | 1.00 | 8.11   | -2.14  | 18.35 | 0.12 | 1.00 | Yes |
| Bacteria   | WS3             | PRR-12              | Sediment-1           | PRR-10                  |                         | 0.50%  | -    | 3.61   | -10.56 | 17.77 | 0.62 | 1.00 | -4.40  | -13.56 | 4.75  | 0.35 | 1.00 | Yes |
| Bacteria   | WWE1            | [Cloacamonae]       | [WWE1]               | [Cloacamonaceae]        | Candidatus Cloacamonas  | 0.10%  | -    | -6.46  | -38.54 | 25.62 | 0.69 | 1.00 | 5.39   | -15.35 | 26.12 | 0.61 | 1.00 | Yes |
| Unassigned | Other           | Other               | Other                | Other                   | Other                   | 0.69   | 0.44 | 0.69   | -1.74  | 3.13  | 0.58 | 1.00 | 0.24   | -1.33  | 1.81  | 0.77 | 1.00 | No  |

Coef., coefficient; CI, confidence interval; q-value, false discovery rate-adjusted p-value. Rare taxa are taxa present in less than 25% of the sample and were categorized to binary variables (present/absence). Relative abundance of non-rare taxa was log10 transformed.

Model adjusted for age, sex, provinces, urbanization index (tertiles: ≤58.8, 58.8-78.8, >78.8), per capita household income (tertiles: ≤7.2, 7.2-18, >18), education, total energy intake, animal-source food consumption, sodium consumption, physical activity (tertiles: ≤75, 75-192, >192), smoking, alcohol intake, estimated glomerular filtration rate (eGFR), and low-density lipoprotein cholesterol.

\* Taxa with factor loadings >0.4 for principal coordinate 4. † Taxa with factor loadings <-0.4 for principal coordinate 4.

**Table S10. Association between individual metabolites (<25% values below detection limits) with systolic and diastolic blood pressure (SBP and DBP)**

| Metabolites                                            | Class        | Pathway                                              | SBP     |      |       |        |         |         |       |        |         |         |        |        | DBP     |         |       |        |         |         |       |       |      |      |                 |        | Platform | RI       | Mass        | PUBCHEM | CAS | KEGG |
|--------------------------------------------------------|--------------|------------------------------------------------------|---------|------|-------|--------|---------|---------|-------|--------|---------|---------|--------|--------|---------|---------|-------|--------|---------|---------|-------|-------|------|------|-----------------|--------|----------|----------|-------------|---------|-----|------|
|                                                        |              |                                                      | Model 1 |      |       |        | Model 2 |         |       |        | Model 1 |         |        |        | Model 2 |         |       |        |         |         |       |       |      |      |                 |        |          |          |             |         |     |      |
|                                                        |              |                                                      | Mean    | SD   | Coef. | 95% CI | p-value | q-value | Coef. | 95% CI | p-value | q-value | Coef.  | 95% CI | p-value | q-value | Coef. | 95% CI | p-value | q-value |       |       |      |      |                 |        |          |          |             |         |     |      |
| (14 or 15)-methylpalmitate (a17:0 or i17:0)            | Lipid        | Fatty Acid, Branched                                 | 0.01    | 0.45 | 0.64  | -2.71  | 4.00    | 0.71    | 0.88  | 0.73   | -2.57   | 4.03    | 0.66   | 0.88   | -0.30   | -2.34   | 1.74  | 0.77   | 0.92    | -0.24   | -2.22 | 1.75  | 0.82 | 0.94 | LC/MS Neg       | 5695   | 269.25   | 17903417 |             |         |     |      |
| (16 or 17)-methylstearate (a19:0 or i19:0)             | Lipid        | Fatty Acid, Branched                                 | 0.04    | 1.01 | 0.64  | -0.92  | 2.19    | 0.42    | 0.75  | 0.73   | -0.79   | 2.26    | 0.34   | 0.73   | 0.33    | -0.62   | 1.27  | 0.50   | 0.80    | 0.40    | -0.52 | 1.32  | 0.39 | 0.78 | LC/MS Neg       | 5993   | 297.28   | 3083779  | 2724-59-6   |         |     |      |
| (2 or 3)-decanoate (10:1n8 or n7)                      | Lipid        | Medium Chain Fatty Acid                              | -0.01   | 0.70 | 2.36  | 0.19   | 4.52    | 0.03    | 0.26  | 2.18   | 0.04    | 4.31    | 0.05   | 0.35   | 1.26    | -0.06   | 2.58  | 0.06   | 0.34    | 1.12    | -0.16 | 2.41  | 0.09 | 0.48 | LC/MS Neg       | 4976   | 169.12   | NA       |             |         |     |      |
| (2,4 or 2,5)-dimethylphenol sulfate                    | Xenobiotics  | Food Component/Plant                                 | -0.65   | 2.45 | 0.49  | -0.23  | 1.22    | 0.18    | 0.55  | 0.48   | -0.24   | 1.19    | 0.19   | 0.61   | -0.05   | -0.49   | 0.40  | 0.84   | 0.95    | -0.06   | -0.49 | 0.37  | 0.78 | 0.93 | LC/MS Neg       | 3474   | 201.02   | NA       |             |         |     |      |
| (N(1) + N(8))-acetylspermidine                         | Amino Acid   | Polyamine Metabolism                                 | 0.01    | 0.50 | 0.19  | -2.86  | 3.25    | 0.90    | 0.96  | 0.52   | -2.48   | 3.53    | 0.73   | 0.90   | 0.44    | -1.42   | 2.30  | 0.64   | 0.86    | 0.70    | -1.12 | 2.51  | 0.45 | 0.82 | LC/MS Pos Early | 3080   | 188.18   | NA       |             |         |     |      |
| (R)-3-hydroxybutyrylcarnitine                          | Lipid        | Fatty Acid Metabolism (Acyl Carnitine, Hydroxy)      | -0.04   | 1.07 | 1.44  | 0.02   | 2.87    | 0.05    | 0.29  | 1.25   | -0.15   | 2.65    | 0.08   | 0.44   | 0.66    | -0.21   | 1.53  | 0.14   | 0.49    | 0.51    | -0.34 | 1.35  | 0.24 | 0.70 | LC/MS Pos Early | 2400   | 248.15   | 53481617 |             |         |     |      |
| (S)-3-hydroxybutyrylcarnitine                          | Lipid        | Fatty Acid Metabolism (Acyl Carnitine, Hydroxy)      | 0.02    | 0.76 | 1.21  | -0.82  | 3.24    | 0.24    | 0.62  | 1.24   | -0.76   | 3.24    | 0.22   | 0.64   | 0.21    | -1.02   | 1.45  | 0.74   | 0.91    | 0.24    | -0.96 | 1.45  | 0.69 | 0.89 | LC/MS Pos Early | 2340   | 248.15   | NA       |             |         |     |      |
| (S)-a-Amino-omega-caprolactam                          | Xenobiotics  | Food Component/Plant                                 | -0.10   | 0.45 | 2.74  | -0.83  | 6.30    | 0.13    | 0.48  | 2.44   | -1.08   | 5.95    | 0.17   | 0.59   | 1.38    | -0.79   | 3.55  | 0.21   | 0.59    | 1.14    | -0.97 | 3.26  | 0.29 | 0.73 | LC/MS Pos Early | 2332   | 129.10   | NA       |             |         |     |      |
| 1-(1-enyl-oleoyl)-GPE (P-18:1)*                        | Lipid        | Lysoplasmalogen                                      | 0.03    | 0.58 | -2.34 | -4.94  | 0.27    | 0.08    | 0.37  | -2.31  | -4.87   | 0.25    | 0.08   | 0.44   | -1.77   | -3.35   | -0.19 | 0.03   | 0.23    | -1.75   | -3.29 | -0.21 | 0.03 | 0.27 | LC/MS Pos Late  | 1566   | 464.31   | NA       |             |         |     |      |
| 1-(1-enyl-palmitoyl)-2-arachidonoyl-GPC (P-16:0/20:4)* | Lipid        | Plasmalogen                                          | 0.00    | 0.45 | 4.95  | 1.61   | 8.29    | 4.E-03  | 0.09  | 4.65   | 1.36    | 7.95    | 0.01   | 0.12   | 1.25    | -0.80   | 3.30  | 0.23   | 0.61    | 1.01    | -0.99 | 3.01  | 0.32 | 0.75 | LC/MS Pos Late  | 2154   | 766.57   | NA       |             |         |     |      |
| 1-(1-enyl-palmitoyl)-2-arachidonoyl-GPE (P-16:0/20:4)* | Lipid        | Plasmalogen                                          | -0.01   | 0.59 | 2.22  | -0.35  | 4.79    | 0.09    | 0.40  | 1.32   | -1.26   | 3.90    | 0.31   | 0.72   | 1.30    | -0.26   | 2.86  | 0.10   | 0.44    | 0.60    | -0.96 | 2.15  | 0.45 | 0.82 | LC/MS Pos Late  | 2270   | 724.53   | NA       |             |         |     |      |
| 1-(1-enyl-palmitoyl)-2-linoleoyl-GPC (P-16:0/18:2)*    | Lipid        | Plasmalogen                                          | 0.03    | 0.43 | 2.71  | -0.83  | 6.26    | 0.13    | 0.48  | 3.38   | -0.12   | 6.88    | 0.06   | 0.40   | 0.95    | -1.22   | 3.11  | 0.39   | 0.73    | 1.42    | -0.69 | 3.54  | 0.19 | 0.63 | LC/MS Pos Late  | 2226   | 742.57   | NA       |             |         |     |      |
| 1-(1-enyl-palmitoyl)-2-linoleoyl-GPE (P-16:0/18:2)*    | Lipid        | Plasmalogen                                          | -0.02   | 0.52 | 0.76  | -1.88  | 3.39    | 0.57    | 0.81  | 0.47   | -2.12   | 3.07    | 0.72   | 0.90   | 0.37    | -1.24   | 1.97  | 0.65   | 0.87    | 0.14    | -1.42 | 1.71  | 0.86 | 0.94 | LC/MS Pos Late  | 2351   | 700.53   | NA       |             |         |     |      |
| 1-(1-enyl-palmitoyl)-2-oleoyl-GPC (P-16:0/18:1)*       | Lipid        | Plasmalogen                                          | 0.00    | 0.41 | 0.36  | -3.36  | 4.08    | 0.85    | 0.94  | 1.84   | -1.89   | 5.57    | 0.33   | 0.73   | -0.48   | -2.74   | 1.79  | 0.68   | 0.89    | 0.61    | -1.64 | 2.86  | 0.59 | 0.88 | LC/MS Pos Late  | 2443   | 744.59   | NA       |             |         |     |      |
| 1-(1-enyl-palmitoyl)-2-oleoyl-GPE (P-16:0/18:1)*       | Lipid        | Plasmalogen                                          | 0.00    | 0.47 | -0.38 | -3.57  | 2.81    | 0.81    | 0.93  | 0.80   | -3.94   | 2.35    | 0.62   | 0.85   | -0.24   | -2.18   | 1.70  | 0.81   | 0.94    | -0.55   | -2.45 | 1.34  | 0.57 | 0.86 | LC/MS Pos Late  | 2600   | 702.54   | NA       |             |         |     |      |
| 1-(1-enyl-palmitoyl)-2-palmitoleoyl-GPC (P-16:0/16:1)* | Lipid        | Plasmalogen                                          | -0.10   | 0.62 | 0.21  | -2.25  | 2.68    | 0.86    | 0.94  | 0.79   | -1.65   | 3.23    | 0.52   | 0.80   | 0.04    | -1.46   | 1.54  | 0.96   | 0.99    | 0.48    | -0.99 | 1.95  | 0.52 | 0.85 | LC/MS Pos Late  | 2218   | 716.56   | NA       |             |         |     |      |
| 1-(1-enyl-palmitoyl)-2-palmitoyl-GPC (P-16:0/16:0)*    | Lipid        | Plasmalogen                                          | 0.00    | 0.41 | 3.82  | 0.20   | 7.45    | 0.04    | 0.27  | 4.20   | 0.63    | 7.77    | 0.02   | 0.23   | 2.03    | -0.18   | 4.24  | 0.07   | 0.37    | 2.30    | 0.14  | 4.45  | 0.04 | 0.31 | LC/MS Pos Late  | 2454   | 718.57   | 11146967 |             |         |     |      |
| 1-(1-enyl-palmitoyl)-GPE (P-16:0)*                     | Lipid        | Lysoplasmalogen                                      | 0.00    | 0.44 | 1.19  | -2.36  | 4.74    | 0.51    | 0.78  | 1.94   | -1.57   | 5.45    | 0.28   | 0.69   | -0.19   | -2.35   | 1.97  | 0.86   | 0.96    | 0.36    | -1.76 | 2.47  | 0.74 | 0.91 | LC/MS Pos Late  | 1547   | 480.34   | 10917802 |             |         |     |      |
| 1-(1-enyl-palmitoyl)-GPE (P-16:0)*                     | Lipid        | Lysoplasmalogen                                      | 0.03    | 0.56 | -0.78 | -3.53  | 1.97    | 0.58    | 0.81  | -1.07  | -3.78   | 1.64    | 0.44   | 0.77   | -0.52   | -2.19   | 1.15  | 0.54   | 0.82    | -0.75   | -2.37 | 0.88  | 0.37 | 0.76 | LC/MS Pos Late  | 1558   | 438.30   | NA       |             |         |     |      |
| 1-(1-enyl-stearoyl)-2-arachidonoyl-GPE (P-18:0/20:4)*  | Lipid        | Plasmalogen                                          | -0.01   | 0.60 | 1.75  | -0.77  | 4.28    | 0.17    | 0.54  | 1.31   | -1.18   | 3.81    | 0.30   | 0.70   | 0.45    | -1.09   | 1.99  | 0.57   | 0.84    | 0.09    | -1.41 | 1.60  | 0.90 | 0.96 | LC/MS Pos Late  | 2511   | 752.56   | 9547058  |             |         |     |      |
| 1-(1-enyl-stearoyl)-2-linoleoyl-GPE (P-18:0/18:2)*     | Lipid        | Plasmalogen                                          | 0.01    | 0.51 | -0.22 | -3.16  | 2.73    | 0.89    | 0.96  | -0.15  | -3.05   | 2.75    | 0.92   | 0.97   | -0.29   | -2.08   | 1.51  | 0.75   | 0.91    | -0.25   | -2.00 | 1.50  | 0.78 | 0.93 | LC/MS Pos Late  | 2633   | 728.56   | NA       |             |         |     |      |
| 1-(1-enyl-stearoyl)-2-oleoyl-GPE (P-18:0/18:1)         | Lipid        | Plasmalogen                                          | -0.05   | 0.59 | -0.98 | -3.49  | 1.53    | 0.44    | 0.76  | -1.16  | -3.63   | 1.31    | 0.36   | 0.74   | -0.83   | -2.36   | 0.70  | 0.29   | 0.65    | -0.97   | -2.46 | 0.52  | 0.20 | 0.65 | LC/MS Pos Late  | 2950   | 730.57   | NA       | 144371-68-6 |         |     |      |
| 1-(1-enyl-stearoyl)-GPE (P-18:0)*                      | Lipid        | Lysoplasmalogen                                      | 0.03    | 0.56 | -1.42 | -4.15  | 1.31    | 0.31    | 0.66  | -1.12  | -3.81   | 1.57    | 0.41   | 0.76   | -1.33   | -2.99   | 0.33  | 0.12   | 0.46    | -1.11   | -2.73 | 0.51  | 0.18 | 0.62 | LC/MS Pos Late  | 1649   | 466.33   | NA       |             |         |     |      |
| 1,2,3-benzenetriol sulfate (2)                         | Xenobiotics  | Chemical                                             | -0.64   | 3.23 | -0.27 | -0.75  | 0.21    | 0.27    | 0.64  | -0.27  | -0.75   | 0.20    | 0.26   | 0.67   | -0.12   | -0.42   | 0.17  | 0.41   | 0.74    | -0.13   | -0.41 | 0.16  | 0.38 | 0.77 | LC/MS Neg       | 1709   | 204.98   | NA       |             |         |     |      |
| 1,2-dilinoleoyl-GPC (18:2/18:2)                        | Lipid        | Phosphatidylcholine (PC)                             | 0.00    | 0.46 | 1.70  | -1.63  | 5.04    | 0.32    | 0.67  | 2.15   | -1.14   | 5.43    | 0.20   | 0.62   | 0.67    | -1.37   | 2.70  | 0.52   | 0.81    | 0.99    | -0.99 | 2.97  | 0.33 | 0.75 | LC/MS Pos Late  | 2006   | 782.57   | 5288075  | 998-06-1    |         |     |      |
| 1,2-dipalmitoyl-GPC (16:0/16:0)                        | Lipid        | Phosphatidylcholine (PC)                             | 0.00    | 0.28 | 7.65  | 2.14   | 13.17   | 0.01    | 0.11  | 8.62   | 3.19    | 14.04   | 2.E-03 | 0.09   | 2.09    | -1.29   | 5.48  | 0.22   | 0.60    | 2.79    | -0.51 | 6.09  | 0.10 | 0.50 | LC/MS Pos Late  | 2365   | 734.57   | 452110   | 63-89-8     |         |     |      |
| 1,5-anhydroglucitol (1,5-AG)                           | Carbohydrate | Glycolysis, Gluconeogenesis, and Pyruvate Metabolism | -0.14   | 0.86 | 0.09  | -1.70  | 1.88    | 0.92    | 0.97  | 0.57   | -1.21   | 2.34    | 0.53   | 0.80   | -0.55   | -1.64   | 0.53  | 0.32   | 0.67    | -0.21   | -1.27 | 0.86  | 0.70 | 0.89 | LC/MS Neg       | 802    | 163.06   | 64960    | 154-58-5    | C07326  |     |      |
| 10-heptadecenoate (17:1n7)                             | Lipid        | Long Chain Monounsaturated Fatty Acid                | -0.02   | 0.67 | 2.68  | 0.46   | 4.90    | 0.02    | 0.18  | 2.49   | 0.30    | 4.67    | 0.03   | 0.26   | 1.94    | 0.60    | 3.29  | 5.E-03 | 0.08    | 1.80    | 0.48  | 3.11  | 0.01 | 0.15 | LC/MS Neg       | 5555   | 267.23   | 5312435  | 29743-97-3  |         |     |      |
| 10-nonadecenoate (19:1n9)                              | Lipid        | Long Chain Monounsaturated Fatty Acid                | 0.03    | 0.76 | 1.78  | -0.17  | 3.73    | 0.07    | 0.35  | 1.76   | -0.16   | 3.67    | 0.07   | 0.43   | 1.21    | 0.02    | 2.39  | 0.05   | 0.30    | 1.19    | 0.04  | 2.34  | 0.04 | 0.34 | LC/MS Neg       | 5780   | 295.26   | 5312513  | 73033-09-7  |         |     |      |
| 10-undecenoate (11:1n1)                                | Lipid        | Medium Chain Fatty Acid                              | -0.03   | 0.82 | -0.01 | -1.86  | 1.84    | 0.99    | 1.00  | 0.21   | -1.61   | 2.04    | 0.82   | 0.93   | 0.23    | -0.90   | 1.36  | 0.69   | 0.89    | 0.40    | -0.70 | 1.50  | 0.47 | 0.83 | LC/MS Neg       | 5085.8 | 183.14   | 14891    | 1333-28-4   | C13910  |     |      |
| 11beta-hydroxyandrostosterone glucuronide              | Lipid        | Androgenic Steroids                                  | -0.10   | 0.92 | 1.60  | -0.09  | 3.29    | 0.06    | 0.33  | 1.41   | -0.26   | 3.08    | 0.10   | 0.47   | 1.29    | 0.27    | 2.32  | 0.01   | 0.14    | 1.14    | 0.14  | 2.15  | 0.03 | 0.27 | LC/MS Neg       | 4228   | 481.24   | NA       |             |         |     |      |
| 13-HODE + 9-HODE                                       | Lipid        | Fatty Acid, Monohydroxy                              | 0.05    | 1.09 | -0.23 | -1.62  | 1.16    | 0.74    | 0.90  | -0.31  | -1.67   | 1.06    | 0.66   | 0.87   | 0.24    | -0.60   | 1.09  | 0.57   | 0.84    | 0.19    | -0.63 | 1.01  | 0.66 | 0.88 | LC/MS Neg       | 5275   | 295.23   | 43013    |             |         |     |      |
| 16a-hydroxy DHEA 3-sulfate                             | Lipid        | Androgenic Steroids                                  | -0.07   | 1.26 | 0.84  | -0.49  | 2.17    | 0.21    | 0.59  | 0.57   | -0.75   | 1.89    | 0.40   | 0.76   | 0.34    | -0.47   | 1.15  | 0.40   | 0.74    | 0.13    | -0.66 | 0.92  | 0.75 | 0.91 | LC/MS Neg       | 4240   | 383.15   | NA       |             |         |     |      |
| 16-hydroxypalmitate                                    | Lipid        | Fatty Acid, Monohydroxy                              | 0.00    | 0.60 | 2.92  | 0.32   | 5.53    | 0.03    | 0.23  | 3.24   | 0.68    | 5.80    | 0.01   | 0.18   | 1.48    | -0.10   | 3.07  | 0.07   | 0.35    | 1.73    | 0.18  | 3.27  | 0.03 | 0.28 | LC/MS Neg       | 5236.2 | 271.23   | 10466    | 506-13-8    | C18218  |     |      |
| 17alpha-hydroxypregnenolone 3-sulfate                  | Lipid        | Pregnenolone Steroids                                | -0.29   | 1.18 | 0.53  | -0.92  | 1.98    | 0.47    | 0.78  | 0.93   | -0.50   | 2.37    | 0.20   | 0.62   | -0.31   | -1.20   | 0.57  | 0.48   | 0.79    | -0.03   | -0.89 | 0.84  | 0.95 | 0.98 | LC/MS Neg       | 4800   | 411.18   | 152971   | 28901-70-4  |         |     |      |
| 1-arachidonoyl-GPA (20:4)                              | Lipid        | Lysophospholipid                                     | -0.06   | 0.99 | -0.62 | -2.24  | 1.00    | 0.45    | 0.76  | -0.10  | -1.72   | 1.52    | 0.91   | 0.96   | -0.85   | -1.83   | 0.14  | 0.09   | 0.41    | -0.46   | -1.44 | 0.51  | 0.35 | 0.75 | LC/MS Neg       | 5499   | 457.24   | NA       | 799268-65-8 |         |     |      |
| 1-arachidonoyl-GPC* (20:4)*                            | Lipid        | Lysophospholipid                                     | 0.00    | 0.46 | 4.2   |        |         |         |       |        |         |         |        |        |         |         |       |        |         |         |       |       |      |      |                 |        |          |          |             |         |     |      |

|                                                  |             |                                                  |       |      |       |       |       |        |      |       |       |       |      |      |       |       |      |      |      |       |       |      |      |      |                 |        |        |          |             |
|--------------------------------------------------|-------------|--------------------------------------------------|-------|------|-------|-------|-------|--------|------|-------|-------|-------|------|------|-------|-------|------|------|------|-------|-------|------|------|------|-----------------|--------|--------|----------|-------------|
| 1-stearoyl-2-arachidonoyl-GPC (18:0/20:4)        | Lipid       | Phosphatidylcholine (PC)                         | -0.02 | 0.42 | 6.08  | 2.52  | 9.64  | 9.E-04 | 0.03 | 5.01  | 1.44  | 8.58  | 0.01 | 0.12 | 3.11  | 0.93  | 5.28 | 0.01 | 0.09 | 2.23  | 0.07  | 4.40 | 0.04 | 0.34 | LC/MS Pos Late  | 2300   | 810.60 | 16219824 | 35418-59-8  |
| 1-stearoyl-2-arachidonoyl-GPE (18:0/20:4)        | Lipid       | Phosphatidylethanolamine (PE)                    | -0.01 | 0.51 | 2.28  | -0.72 | 5.28  | 0.14   | 0.48 | 1.50  | -1.48 | 4.48  | 0.32 | 0.72 | 0.95  | -0.87 | 2.78 | 0.31 | 0.66 | 0.36  | -1.44 | 2.15 | 0.70 | 0.89 | LC/MS Polar     | 756    | 766.54 | 5289133  |             |
| 1-stearoyl-2-arachidonoyl-GPI (18:0/20:4)        | Lipid       | Phosphatidylinositol (PI)                        | -0.01 | 0.37 | 4.45  | 0.25  | 8.65  | 0.04   | 0.27 | 3.74  | -0.42 | 7.89  | 0.08 | 0.44 | 3.08  | 0.53  | 5.62 | 0.02 | 0.17 | 2.53  | 0.03  | 5.02 | 0.05 | 0.35 | LC/MS Polar     | 870    | 885.55 | NA       | 383907-33-3 |
| 1-stearoyl-2-docosahexaenoyl-GPC (18:0/22:6)     | Lipid       | Phosphatidylcholine (PC)                         | -0.02 | 0.50 | 2.05  | -1.03 | 5.13  | 0.19   | 0.56 | 0.87  | -2.23 | 3.97  | 0.58 | 0.84 | 1.77  | -0.10 | 3.64 | 0.06 | 0.35 | 0.88  | -0.99 | 2.74 | 0.36 | 0.75 | LC/MS Pos Late  | 2197   | 834.60 | NA       | 59403-52-0  |
| 1-stearoyl-2-docosahexaenoyl-GPE (18:0/22:6)*    | Lipid       | Phosphatidylethanolamine (PE)                    | -0.12 | 0.83 | 0.63  | -1.20 | 2.45  | 0.50   | 0.78 | -0.22 | -2.06 | 1.62  | 0.81 | 0.93 | -0.05 | -1.15 | 1.06 | 0.94 | 0.98 | -0.72 | -1.83 | 0.39 | 0.20 | 0.65 | LC/MS Pos Late  | 2317   | 792.55 | 9546798  |             |
| 1-stearoyl-2-linoleoyl-GPC (18:0/18:2)*          | Lipid       | Phosphatidylcholine (PC)                         | 0.00  | 0.22 | 5.16  | -1.70 | 12.02 | 0.14   | 0.49 | 4.21  | -2.56 | 10.98 | 0.22 | 0.64 | 4.10  | -0.07 | 8.26 | 0.05 | 0.33 | 3.35  | -0.72 | 7.42 | 0.11 | 0.53 | LC/MS Pos Late  | 2380   | 786.60 | NA       |             |
| 1-stearoyl-2-linoleoyl-GPE (18:0/18:2)*          | Lipid       | Phosphatidylethanolamine (PE)                    | 0.01  | 0.73 | 1.16  | -0.95 | 3.27  | 0.28   | 0.65 | 0.53  | -1.58 | 2.63  | 0.62 | 0.85 | 0.67  | -0.62 | 1.95 | 0.31 | 0.66 | 0.19  | -1.08 | 1.45 | 0.77 | 0.93 | LC/MS Pos Late  | 2522   | 744.55 | 9546749  |             |
| 1-stearoyl-2-linoleoyl-GPI (18:0/18:2)           | Lipid       | Phosphatidylinositol (PI)                        | 0.00  | 0.38 | 1.22  | -2.80 | 5.24  | 0.55   | 0.80 | 1.88  | -2.08 | 5.85  | 0.35 | 0.73 | 1.29  | -1.15 | 3.73 | 0.30 | 0.65 | 1.80  | -0.58 | 4.19 | 0.14 | 0.57 | LC/MS Polar     | 910    | 861.55 | NA       |             |
| 1-stearoyl-2-oleoyl-GPC (18:0/18:1)              | Lipid       | Phosphatidylcholine (PC)                         | 0.02  | 0.47 | 1.86  | -1.53 | 5.25  | 0.28   | 0.65 | 1.45  | -1.90 | 4.79  | 0.40 | 0.76 | 0.29  | -1.78 | 2.36 | 0.78 | 0.93 | -0.03 | -2.05 | 1.99 | 0.98 | 0.99 | LC/MS Pos Late  | 2644   | 788.62 | NA       | 56421-10-4  |
| 1-stearoyl-2-oleoyl-GPE (18:0/18:1)              | Lipid       | Phosphatidylethanolamine (PE)                    | -0.06 | 0.84 | 0.63  | -1.21 | 2.46  | 0.50   | 0.78 | -0.13 | -1.98 | 1.72  | 0.89 | 0.96 | -0.05 | -1.17 | 1.06 | 0.92 | 0.98 | -0.66 | -1.77 | 0.46 | 0.25 | 0.70 | LC/MS Pos Late  | 2858   | 746.57 | NA       |             |
| 1-stearoyl-GPC (18:0)                            | Lipid       | Lysophospholipid                                 | 0.01  | 0.38 | 2.75  | -1.38 | 6.88  | 0.19   | 0.56 | 2.55  | -1.52 | 6.61  | 0.22 | 0.64 | 1.93  | -0.58 | 4.44 | 0.13 | 0.49 | 1.77  | -0.68 | 4.21 | 0.16 | 0.59 | LC/MS Pos Late  | 1606   | 524.37 | 497299   | 19420-57-6  |
| 1-stearoyl-GPE (18:0)                            | Lipid       | Lysophospholipid                                 | -0.01 | 0.47 | 1.46  | -1.80 | 4.73  | 0.38   | 0.72 | 1.44  | -1.77 | 4.65  | 0.38 | 0.75 | 0.56  | -1.43 | 2.54 | 0.58 | 0.84 | 0.54  | -1.40 | 2.47 | 0.58 | 0.87 | LC/MS Pos Late  | 1626   | 482.32 | 9547068  | 9547068     |
| 1-stearoyl-GPG (18:0)                            | Lipid       | Lysophospholipid                                 | -0.52 | 1.24 | 1.58  | 0.35  | 2.80  | 0.01   | 0.14 | 1.40  | 0.19  | 2.61  | 0.02 | 0.24 | 0.83  | 0.08  | 1.57 | 0.03 | 0.23 | 0.69  | -0.04 | 1.42 | 0.06 | 0.40 | LC/MS Neg       | 5816   | 511.30 | NA       |             |
| 1-stearoyl-GPI (18:0)                            | Lipid       | Lysophospholipid                                 | -0.02 | 0.57 | -0.71 | -3.34 | 1.92  | 0.60   | 0.82 | -0.54 | -3.12 | 2.05  | 0.68 | 0.89 | 0.71  | -0.89 | 2.31 | 0.38 | 0.72 | 0.85  | -0.71 | 2.40 | 0.28 | 0.72 | LC/MS Neg       | 5794   | 599.32 | NA       | 796963-93-4 |
| 2,3-dihydroxy-5-methylthio-4-pentenoate (DMTPA)* | Amino Acid  | Methionine, Cysteine, SAM and Taurine Metabolism | 0.02  | 0.39 | 7.88  | 3.11  | 12.66 | 1.E-03 | 0.04 | 6.51  | 1.73  | 11.29 | 0.01 | 0.14 | 2.98  | 0.05  | 5.91 | 0.05 | 0.30 | 1.85  | -1.04 | 4.75 | 0.21 | 0.67 | LC/MS Neg       | 1156   | 177.02 | NA       |             |
| 2,3-dihydroxyisovalerate                         | Xenobiotics | Food Component/Plant                             | 0.25  | 1.39 | -0.14 | -1.24 | 0.97  | 0.81   | 0.92 | -0.16 | -1.25 | 0.92  | 0.77 | 0.92 | 0.67  | 0.00  | 1.34 | 0.05 | 0.31 | 0.65  | 0.00  | 1.31 | 0.05 | 0.36 | LC/MS Polar     | 1050   | 133.05 | 677      | 1756-18-9   |
| 2,4-di-tert-butylphenol                          | Xenobiotics | Chemical                                         | 0.01  | 0.34 | 2.75  | -1.85 | 7.35  | 0.24   | 0.61 | 2.66  | -1.86 | 7.18  | 0.25 | 0.66 | 2.28  | -0.51 | 5.08 | 0.11 | 0.45 | 2.22  | -0.50 | 4.94 | 0.11 | 0.53 | LC/MS Neg       | 5780   | 205.16 | NA       |             |
| 2,6-dihydroxybenzoic acid                        | Xenobiotics | Benzoate Metabolism                              | 0.03  | 0.92 | 0.51  | -1.15 | 2.16  | 0.55   | 0.80 | 0.57  | -1.06 | 2.20  | 0.49 | 0.79 | -0.33 | -1.34 | 0.68 | 0.52 | 0.81 | -0.28 | -1.26 | 0.70 | 0.58 | 0.87 | LC/MS Neg       | 2580.5 | 153.02 | NA       |             |
| 21-hydroxypregnenolone disulfate                 | Lipid       | Pregnenolone Steroids                            | -0.04 | 0.78 | 0.69  | -1.48 | 2.86  | 0.53   | 0.79 | 1.23  | -0.92 | 3.38  | 0.26 | 0.68 | 0.33  | -0.99 | 1.65 | 0.62 | 0.85 | 0.73  | -0.57 | 2.02 | 0.27 | 0.71 | LC/MS Neg       | 3935   | 245.07 | 134595   | 1164-98-3   |
| 2-aminoadipate                                   | Amino Acid  | Lysine Metabolism                                | -0.04 | 0.48 | 3.51  | 0.28  | 6.73  | 0.03   | 0.26 | 2.25  | -1.01 | 5.51  | 0.18 | 0.59 | 1.99  | 0.03  | 3.95 | 0.05 | 0.30 | 1.00  | -0.97 | 2.96 | 0.32 | 0.75 | LC/MS Neg       | 639.2  | 160.06 | 469      | 542-32-5;11 |
| 2-aminobutyrate                                  | Amino Acid  | Glutathione Metabolism                           | 0.00  | 0.44 | -1.20 | -4.73 | 2.33  | 0.50   | 0.78 | -1.48 | -4.95 | 1.99  | 0.40 | 0.76 | -0.58 | -2.73 | 1.57 | 0.60 | 0.84 | -0.79 | -2.89 | 1.30 | 0.46 | 0.82 | LC/MS Pos Early | 2059   | 104.07 | 439691   | 1492-24-6   |
| 2-aminooctanoate                                 | Lipid       | Fatty Acid, Amino                                | -0.05 | 0.78 | 1.03  | -0.93 | 2.98  | 0.30   | 0.66 | 0.27  | -1.70 | 2.24  | 0.79 | 0.92 | 1.30  | 0.11  | 2.48 | 0.03 | 0.24 | 0.74  | -0.44 | 1.92 | 0.22 | 0.68 | LC/MS Pos Early | 3160   | 146.12 | 227939   | 1115-90-8   |
| 2-aminophenol sulfate                            | Xenobiotics | Chemical                                         | -0.05 | 0.86 | -0.67 | -2.44 | 1.09  | 0.45   | 0.76 | -0.70 | -2.44 | 1.03  | 0.43 | 0.77 | -0.08 | -1.16 | 0.99 | 0.88 | 0.97 | -0.11 | -1.16 | 0.94 | 0.84 | 0.94 | LC/MS Neg       | 3385   | 158.12 | 69522    | 644-90-6    |
| 2-arachidonoylglycerol (20:4)                    | Lipid       | Chemical                                         | 0.00  | 1.60 | -0.29 | -1.23 | 0.65  | 0.54   | 0.80 | -0.32 | -1.24 | 0.60  | 0.49 | 0.79 | -0.29 | -0.86 | 0.28 | 0.32 | 0.68 | -0.31 | -0.86 | 0.24 | 0.27 | 0.71 | LC/MS Neg       | 1677   | 188.00 | 181670   |             |
| 2'-deoxyuridine                                  | Nucleotide  | Monoacylglycerol                                 | -0.27 | 1.09 | 0.50  | -0.90 | 1.91  | 0.48   | 0.78 | 0.27  | -1.12 | 1.66  | 0.70 | 0.89 | 0.23  | -0.63 | 1.08 | 0.60 | 0.84 | 0.04  | -0.80 | 0.88 | 0.92 | 0.96 | LC/MS Neg       | 6170   | 303.23 | 5282280  | 53847-30-6  |
| 2'-hydroxy-3-methylvalerate                      | Amino Acid  | Pyrimidine Metabolism, Uracil containing         | 0.00  | 0.58 | 1.37  | -1.34 | 4.08  | 0.32   | 0.67 | 2.33  | -0.37 | 5.03  | 0.09 | 0.45 | -0.34 | -1.99 | 1.31 | 0.68 | 0.89 | 0.35  | -1.28 | 1.98 | 0.68 | 0.89 | LC/MS Neg       | 1586   | 227.07 | 13712    | 951-78-0    |
| 2-hydroxyadipate                                 | Lipid       | Leucine, Isoleucine and Valine Metabolism        | 0.09  | 0.83 | 0.69  | -1.37 | 2.75  | 0.51   | 0.78 | 0.80  | -1.23 | 2.82  | 0.44 | 0.77 | 0.59  | -0.66 | 1.84 | 0.36 | 0.70 | 0.67  | -0.55 | 1.89 | 0.28 | 0.72 | LC/MS Neg       | 1800   | 131.07 | 164623   | 488-15-3    |
| 2-hydroxybutyrate/2-hydroxyisobutyrate           | Amino Acid  | Fatty Acid, Dicarboxylate                        | -0.46 | 1.21 | 1.20  | -0.07 | 2.48  | 0.06   | 0.33 | 0.94  | -0.32 | 2.20  | 0.14 | 0.55 | 0.54  | -0.24 | 1.32 | 0.17 | 0.55 | 0.34  | -0.42 | 1.10 | 0.38 | 0.77 | LC/MS Polar     | 3000   | 161.05 | 193530   | 18294-85-4  |
| 2-hydroxydecanoate                               | Lipid       | Glutathione Metabolism                           | -0.02 | 0.64 | 0.26  | -2.16 | 2.68  | 0.83   | 0.94 | -0.19 | -2.58 | 2.20  | 0.88 | 0.96 | 0.04  | -1.43 | 1.52 | 0.96 | 0.99 | -0.30 | -1.74 | 1.14 | 0.68 | 0.89 | LC/MS Polar     | 1258   | 103.04 | NA       |             |
| 2-hydroxyfluorene sulfate                        | Xenobiotics | Fatty Acid, Monohydroxy                          | 0.09  | 0.70 | 0.21  | -2.37 | 1.94  | 0.85   | 0.94 | -0.26 | -2.38 | 1.86  | 0.81 | 0.93 | 0.24  | -1.07 | 1.55 | 0.72 | 0.91 | 0.20  | -1.08 | 1.48 | 0.76 | 0.92 | LC/MS Neg       | 4840   | 187.13 | 21488    | 5393-81-7   |
| 2-hydroxyglutarate                               | Lipid       | Tobacco Metabolite                               | -0.15 | 1.43 | 0.07  | -1.14 | 1.28  | 0.91   | 0.96 | 0.08  | -1.11 | 1.26  | 0.90 | 0.96 | -0.35 | -1.09 | 0.38 | 0.35 | 0.70 | -0.35 | -1.07 | 0.36 | 0.34 | 0.75 | LC/MS Neg       | 4372   | 261.02 | NA       |             |
| 2-hydroxyheptanoate*                             | Lipid       | Fatty Acid, Dicarboxylate                        | 0.00  | 0.53 | -0.50 | -3.44 | 2.44  | 0.74   | 0.90 | -0.29 | -3.18 | 2.61  | 0.85 | 0.95 | 0.39  | -1.40 | 2.18 | 0.67 | 0.88 | 0.55  | -1.19 | 2.29 | 0.53 | 0.85 | LC/MS Pos Early | 958    | 131.03 | 43       | 40951-21-1  |
| 2-hydroxyhippurate (salicylurate)                | Xenobiotics | Fatty Acid, Monohydroxy                          | 0.03  | 0.48 | -1.94 | -1.54 | 1.26  | 0.23   | 0.61 | -1.77 | -4.92 | 1.38  | 0.27 | 0.69 | -1.17 | -2.11 | 1.78 | 0.87 | 0.96 | -0.03 | -1.92 | 1.87 | 0.98 | 0.99 | LC/MS Polar     | 925    | 145.09 | 2750949  |             |
| 2-hydroxyisovalerate                             | Lipid       | Benzoate Metabolism                              | -0.07 | 0.20 | 0.79  | 0.03  | 1.55  | 0.04   | 0.28 | 0.65  | -0.10 | 1.40  | 0.09 | 0.45 | 0.20  | -0.26 | 0.67 | 0.39 | 0.73 | 0.09  | -0.36 | 0.54 | 0.69 | 0.89 | LC/MS Neg       | 2184   | 194.05 | 10253    | 487-54-7    |
| 2-hydroxynervonate*                              | Lipid       | Fatty Acid, Monohydroxy                          | -0.20 | 0.70 | -1.52 | -3.77 | 0.73  | 0.19   | 0.55 | -1.52 | -3.74 | 0.69  | 0.18 | 0.59 | 0.08  | -1.30 | 1.45 | 0.91 | 0.97 | 0.06  | -1.28 | 1.40 | 0.93 | 0.97 | LC/MS Neg       | 5211   | 215.17 | 97783    | 2984-55-6   |
| 2-hydroxyoctanoate                               | Lipid       | Fatty Acid, Monohydroxy                          | 0.07  | 0.79 | -1.30 | -3.29 | 0.68  | 0.20   | 0.57 | -1.01 | -2.97 | 0.94  | 0.31 | 0.71 | -0.96 | -2.17 | 0.25 | 0.12 | 0.47 | -0.74 | -1.92 | 0.44 | 0.22 | 0.68 | LC/MS Neg       | 6345   | 381.34 | 5312783  |             |
| 2-hydroxypalmitate                               | Lipid       | Fatty Acid, Monohydroxy                          | 0.00  | 0.73 | 0.69  | -1.41 | 2.80  | 0.52   | 0.79 | 0.34  | -1.74 | 2.42  | 0.75 | 0.91 | 0.85  | -0.43 | 2.13 | 0.19 | 0.57 | 0.58  | -0.67 | 1.83 | 0.36 | 0.75 | LC/MS Neg       | 3736.8 | 159.10 | 94180    | 617-73-2    |
| 2-hydroxyphenylacetate                           | Amino Acid  | Fatty Acid, Monohydroxy                          | 0.02  | 0.44 | 1.25  | -2.25 | 4.75  | 0.48   | 0.78 | 1.85  | -1.60 | 5.30  | 0.29 | 0.70 | 1.40  | -0.73 | 3.52 | 0.20 | 0.57 | 1.85  | -0.22 | 3.92 | 0.08 | 0.46 | LC/MS Neg       | 5511.2 | 271.23 | 92836    | 764-67-0    |
| 2-hydroxysebacic acid                            | Lipid       | Phenylalanine Metabolism                         | -0.24 | 0.79 | 0.97  | -1.00 | 2.94  | 0.33   | 0.69 | 1.25  | -0.68 | 3.19  | 0.20 | 0.62 | -0.11 | -1.31 | 1.09 | 0.85 | 0.95 | 0.10  | -1.07 | 1.27 | 0.86 | 0.95 | LC/MS Polar     | 858.6  | 151.04 | 11970    | 614-75-5    |
| 2-hydroxystearate                                | Lipid       | Fatty Acid, Dicarboxylate                        | 0.04  | 1.21 | 0.14  | -1.35 | 1.63  | 0.86   | 0.94 | 0.07  | -1.40 | 1.53  | 0.93 | 0.97 | 0.13  | -0.78 | 1.03 | 0.78 | 0.93 | 0.07  | -0.81 | 0.95 | 0.87 | 0.95 | LC/MS Neg       | 1392   | 217.11 | NA       |             |
| 2-keto-3-deoxy-gluconate                         | Xenobiotics | Fatty Acid, Monohydroxy                          | 0.01  | 0.47 | -0.45 | -3.68 | 2.79  | 0.79   | 0.92 | 0.09  | -3.11 | 3.29  | 0.96 | 0.98 | 0.80  | -1.17 | 2.77 | 0.42 | 0.74 | 1.21  | -0.71 | 3.13 | 0.22 | 0.68 | LC/MS Neg       | 5695   | 299.26 | 69417    | 629-22-1    |
| 2-ketocaprylate                                  | Amino Acid  | Food Component/Plant                             | -0.04 | 0.55 | 3.00  | 0.08  | 5.92  | 0.04   | 0.29 | 2.44  | -0.45 | 5.33  | 0.10 | 0.47 | 1.50  | -0.28 | 3.27 | 0.10 | 0.43 | 1.07  | -0.66 | 2.81 | 0.23 | 0.69 | LC/MS Polar     | 1900   | 177.04 | 161227   | 17510-99-5  |
| 2-linoleoylglycerol (18:2)                       | Lipid       | Leucine, Isoleucine and Valine Metabolism        | -0.49 | 1.44 | 0.89  | -0.21 | 1.98  | 0.11   | 0.44 | 0.78  | -0.29 | 1.86  | 0.15 | 0.57 | 0.40  | -0.26 | 1.07 | 0.2  |      |       |       |      |      |      |                 |        |        |          |             |





|                                                                 |                                   |                                                              |       |      |       |       |       |        |      |       |       |       |        |      |       |       |       |        |        |       |       |       |        |        |                 |                |        |                          |                         |
|-----------------------------------------------------------------|-----------------------------------|--------------------------------------------------------------|-------|------|-------|-------|-------|--------|------|-------|-------|-------|--------|------|-------|-------|-------|--------|--------|-------|-------|-------|--------|--------|-----------------|----------------|--------|--------------------------|-------------------------|
| branched-chain, straight-chain, or cyclopropyl 12:1 fatty acid* | Partially Characterized Molecules | Partially Characterized Molecules                            | -0.05 | 0.92 | 1.65  | 0.03  | 3.27  | 0.05   | 0.29 | 1.62  | 0.02  | 3.21  | 0.05   | 0.35 | 0.76  | -0.23 | 1.75  | 0.13   | 0.49   | 0.73  | -0.23 | 1.70  | 0.13   | 0.56   | LC/MS Neg       | 5263           | 197.16 | NA                       |                         |
| butyrate/isobutyrate (4:0)                                      | Lipid                             | Short Chain Fatty Acid                                       | -0.03 | 0.76 | -1.01 | -3.01 | 1.00  | 0.32   | 0.68 | -1.43 | -3.41 | 0.56  | 0.16   | 0.58 | -0.37 | -1.59 | 0.85  | 0.55   | 0.83   | -0.68 | -1.87 | 0.52  | 0.27   | 0.71   | LC/MS Neg       | 1024           | 87.05  | NA                       |                         |
| butyrylcarnitine (C4)                                           | Lipid                             | Fatty Acid Metabolism (also BCAA Metabolism)                 | -0.18 | 1.11 | -0.21 | -1.58 | 1.16  | 0.76   | 0.90 | -0.53 | -1.88 | 0.83  | 0.44   | 0.77 | 0.21  | -0.62 | 1.05  | 0.61   | 0.85   | -0.02 | -0.83 | 0.80  | 0.97   | 0.99   | LC/MS Pos Early | 2860           | 232.15 | 439829 25576-40-3 C02862 |                         |
| caffeic acid sulfate                                            | Xenobiotics                       | Food Component/Plant                                         | -0.37 | 2.04 | 0.23  | -0.52 | 0.98  | 0.55   | 0.80 | 0.11  | -0.63 | 0.86  | 0.76   | 0.92 | 0.25  | -0.21 | 0.71  | 0.28   | 0.64   | 0.16  | -0.29 | 0.60  | 0.49   | 0.84   | LC/MS Polar     | 1307           | 258.99 | NA                       |                         |
| caprate (10:0)                                                  | Lipid                             | Medium Chain Fatty Acid                                      | 0.03  | 0.35 | 3.52  | -0.73 | 0.78  | 0.10   | 0.42 | 3.93  | -0.26 | 8.11  | 0.07   | 0.41 | 1.52  | -1.07 | 4.11  | 0.25   | 0.63   | 1.82  | -0.70 | 4.35  | 0.16   | 0.59   | LC/MS Neg       | 5090.7         | 171.14 | 2969 334-48-5 C01571     |                         |
| caproate (6:0)                                                  | Lipid                             | Medium Chain Fatty Acid                                      | 0.02  | 0.45 | 0.00  | -3.39 | 3.39  | 1.00   | 1.00 | -0.01 | -3.35 | 3.32  | 0.99   | 1.00 | -0.36 | -2.42 | 1.70  | 0.73   | 0.91   | -0.37 | -2.37 | 1.64  | 0.72   | 0.90   | LC/MS Neg       | 2713.7         | 115.08 | 8892 142-62-1 C01585     |                         |
| caprylate (8:0)                                                 | Lipid                             | Medium Chain Fatty Acid                                      | -0.02 | 0.37 | 2.23  | -1.82 | 6.28  | 0.28   | 0.65 | 2.23  | -1.76 | 6.21  | 0.27   | 0.69 | 0.76  | -1.71 | 3.23  | 0.54   | 0.83   | 0.76  | -1.84 | 3.16  | 0.53   | 0.85   | LC/MS Neg       | 4362           | 143.11 | 379 124-07-2 C06423      |                         |
| carboxyethyl-GABA                                               | Amino Acid                        | Glutamate Metabolism                                         | -0.25 | 0.76 | -0.61 | -2.70 | 1.48  | 0.57   | 0.81 | -0.58 | -2.64 | 1.48  | 0.58   | 0.84 | -0.76 | -2.03 | 0.51  | 0.24   | 0.62   | -0.73 | -1.97 | 0.50  | 0.24   | 0.70   | LC/MS Pos Early | 2085           | 176.09 | 2572 908055              |                         |
| carnitine                                                       | Lipid                             | Carnitine Metabolism                                         | -0.01 | 0.26 | 6.36  | 0.73  | 11.99 | 0.03   | 0.22 | 6.21  | 0.67  | 11.75 | 0.03   | 0.26 | 3.43  | 0.00  | 6.86  | 0.05   | 0.31   | 3.32  | -0.02 | 6.66  | 0.05   | 0.36   | LC/MS Pos Early | 1978           | 162.11 | 10917 461-05-2 C00318    |                         |
| carotene diol (1)                                               | Cofactors and Vitamins            | Vitamin A Metabolism                                         | -0.13 | 0.86 | 1.17  | -0.67 | 3.00  | 0.21   | 0.59 | 1.42  | -0.38 | 3.23  | 0.12   | 0.52 | 0.52  | -0.60 | 1.63  | 0.36   | 0.71   | 0.71  | -0.38 | 1.79  | 0.20   | 0.65   | LC/MS Pos Late  | 1720           | 568.43 | NA                       |                         |
| carotene diol (2)                                               | Cofactors and Vitamins            | Vitamin A Metabolism                                         | -0.11 | 0.94 | 0.39  | -1.27 | 2.06  | 0.64   | 0.86 | 0.65  | -1.00 | 2.29  | 0.44   | 0.77 | 0.27  | -0.75 | 1.28  | 0.60   | 0.84   | 0.46  | -0.53 | 1.45  | 0.36   | 0.76   | LC/MS Pos Late  | 1904           | 568.43 | NA                       |                         |
| catechol sulfate                                                | Xenobiotics                       | Benzoate Metabolism                                          | -0.03 | 1.06 | -0.19 | -1.65 | 1.26  | 0.79   | 0.92 | 0.66  | -1.49 | 1.37  | 0.93   | 0.97 | -0.50 | -1.38 | 0.38  | 0.26   | 0.63   | -0.40 | -1.26 | 0.46  | 0.36   | 0.75   | LC/MS Neg       | 1906           | 188.99 | 3083879 4918-96-1        |                         |
| ceramide (d18:1/20:0, d16:1/22:0, d20:1/18:0)*                  | Lipid                             | Ceramides                                                    | -0.80 | 1.35 | -0.63 | -1.83 | 0.57  | 0.30   | 0.66 | -1.04 | -2.23 | 0.15  | 0.09   | 0.45 | 0.20  | -0.53 | 0.93  | 0.58   | 0.84   | -0.09 | -0.81 | 0.63  | 0.81   | 0.93   | LC/MS Pos Late  | 3920           | 594.58 | NA                       |                         |
| ceramide (d18:2/24:1, d18:1/24:2)*                              | Lipid                             | Ceramides                                                    | -0.26 | 1.08 | 0.85  | -0.64 | 2.35  | 0.26   | 0.63 | 0.46  | -1.02 | 1.95  | 0.54   | 0.81 | 0.39  | -0.52 | 1.30  | 0.40   | 0.73   | 0.09  | -0.80 | 0.98  | 0.84   | 0.94   | LC/MS Pos Late  | 3858           | 646.61 | NA                       |                         |
| cerotylcarnitine (C26)*                                         | Lipid                             | Fatty Acid Metabolism (Acyl Carnitine, Long Chain Saturated) | -0.02 | 0.66 | 4.29  | 2.02  | 6.56  | 2.E-04 | 0.02 | 3.91  | 1.66  | 6.16  | 7.E-04 | 0.06 | 3.10  | 1.72  | 4.47  | 1.E-05 | 3.E-03 | 2.81  | 1.46  | 4.16  | 5.E-05 | 0.01   | LC/MS Pos Late  | 1649           | 540.50 | NA                       |                         |
| C-glycosyltryptophan                                            | Amino Acid                        | Tryptophan Metabolism                                        | -0.02 | 0.34 | 5.28  | -0.15 | 10.72 | 0.06   | 0.33 | 4.69  | -0.67 | 10.05 | 0.09   | 0.45 | 1.48  | -1.83 | 4.80  | 0.38   | 0.72   | 1.02  | -2.21 | 4.25  | 0.54   | 0.85   | LC/MS Neg       | 1777           | 365.14 | 10981970 180509-18-6     |                         |
| chenodeoxycholate                                               | Lipid                             | Primary Bile Acid Metabolism                                 | 0.26  | 1.50 | 0.00  | -1.00 | 1.00  | 0.99   | 1.00 | 0.08  | -0.90 | 1.07  | 0.87   | 0.96 | -0.07 | -0.68 | 0.54  | 0.81   | 0.94   | -0.01 | -0.61 | 0.58  | 0.96   | 0.98   | LC/MS Neg       | 5264           | 391.29 | 10133 474-24-9;47-C02528 |                         |
| chiro-inositol                                                  | Lipid                             | Inositol Metabolism                                          | -0.43 | 2.03 | 0.37  | -0.39 | 1.14  | 0.34   | 0.69 | 0.30  | -0.46 | 1.05  | 0.44   | 0.77 | 0.16  | -0.31 | 0.63  | 0.51   | 0.81   | 0.10  | -0.36 | 0.55  | 0.68   | 0.89   | LC/MS Polar     | 3191.2         | 225.06 | NA 643-12-9 C19891       |                         |
| cholate                                                         | Lipid                             | Primary Bile Acid Metabolism                                 | 0.32  | 1.88 | -0.59 | -1.40 | 1.22  | 0.15   | 0.50 | -0.64 | -1.43 | 0.16  | 0.12   | 0.50 | -0.41 | -0.90 | 0.08  | 0.10   | 0.45   | -0.44 | -0.92 | 0.04  | 0.07   | 0.44   | LC/MS Neg       | 5165           | 407.28 | 221493 81-25-4 C00695    |                         |
| cholesterol                                                     | Lipid                             | Sterol                                                       | -0.01 | 0.33 | 8.48  | 3.89  | 13.07 | 3.E-04 | 0.02 | 7.67  | 3.12  | 12.22 | 1.E-03 | 0.06 | 4.80  | 2.00  | 7.60  | 8.E-04 | 0.03   | 0.43  | 4.16  | 1.41  | 6.91   | 3.E-03 | 0.11            | LC/MS Pos Late | 2707   | 369.35                   | 11025495 57-88-5 C00187 |
| cholesterol sulfate                                             | Lipid                             | Sterol                                                       | -0.08 | 0.82 | 1.93  | 0.07  | 3.79  | 0.04   | 0.28 | 1.87  | 0.05  | 3.70  | 0.04   | 0.34 | 1.04  | -0.09 | 2.17  | 0.07   | 0.36   | 1.00  | -0.10 | 2.10  | 0.08   | 0.45   | LC/MS Neg       | 6625           | 465.30 | NA                       |                         |
| choline                                                         | Lipid                             | Phospholipid Metabolism                                      | 0.01  | 0.33 | -1.18 | -5.98 | 3.61  | 0.63   | 0.85 | -0.41 | -5.15 | 4.32  | 0.86   | 0.96 | -0.79 | -3.70 | 2.13  | 0.60   | 0.84   | -0.22 | -3.07 | 2.63  | 0.88   | 0.95   | LC/MS Pos Early | 1961           | 104.11 | 305 67-48-1 C00114       |                         |
| cinnamoylglycine                                                | Xenobiotics                       | Food Component/Plant                                         | -0.38 | 2.23 | -0.18 | -0.89 | 0.52  | 0.61   | 0.83 | -0.01 | -0.71 | 0.69  | 0.99   | 1.00 | -0.23 | -0.66 | 0.20  | 0.30   | 0.65   | -0.09 | -0.52 | 0.33  | 0.66   | 0.89   | LC/MS Neg       | 3127           | 204.07 | 709625 16534-24-0        |                         |
| cis-3,4-methyleneheptanoic acid                                 | Lipid                             | Fatty Acid, Branched                                         | 0.01  | 1.01 | -0.36 | -1.93 | 1.21  | 0.65   | 0.86 | -0.75 | -2.31 | 0.80  | 0.34   | 0.73 | 0.01  | -0.95 | 0.96  | 0.99   | 0.99   | -0.29 | -1.23 | 0.65  | 0.55   | 0.85   | LC/MS Neg       | 3718           | 141.09 | NA                       |                         |
| cis-3,4-methyleneheptanoyl carnitine                            | Lipid                             | Fatty Acid Metabolism (Acyl Carnitine, Medium Chain)         | -0.11 | 1.07 | 0.43  | -1.06 | 1.92  | 0.57   | 0.81 | -0.06 | -1.54 | 1.43  | 0.94   | 0.97 | 0.39  | -0.51 | 1.30  | 0.39   | 0.73   | 0.02  | -0.87 | 0.92  | 0.96   | 0.98   | LC/MS Pos Late  | 870            | 286.20 | NA                       |                         |
| cis-3,4-methyleneheptanoyl glycine                              | Lipid                             | Fatty Acid Metabolism (Acyl Glycine)                         | -0.21 | 1.28 | 0.14  | -1.06 | 1.35  | 0.81   | 0.93 | -0.16 | -1.36 | 1.03  | 0.79   | 0.92 | 0.14  | -0.59 | 0.87  | 0.71   | 0.90   | -0.10 | -0.82 | 0.62  | 0.79   | 0.93   | LC/MS Neg       | 3765           | 198.11 | NA                       |                         |
| cis-4-decenoate                                                 | Lipid                             | Medium Chain Fatty Acid                                      | 0.06  | 0.83 | 2.63  | 0.80  | 4.46  | 0.01   | 0.09 | 2.59  | 0.79  | 4.40  | 5.E-03 | 0.12 | 2.06  | 0.95  | 3.17  | 3.E-04 | 0.01   | 2.03  | 0.95  | 3.11  | 2.E-04 | 0.02   | LC/MS Neg       | 4886           | 169.12 | NA                       |                         |
| cis-4-decenoylcarnitine (C10:1)                                 | Lipid                             | Fatty Acid Metabolism (Acyl Carnitine, Monounsaturated)      | -0.14 | 1.26 | 1.67  | 0.45  | 2.89  | 0.01   | 0.12 | 1.74  | 0.53  | 2.94  | 5.E-03 | 0.12 | 1.48  | 0.74  | 2.22  | 9.E-05 | 0.01   | 1.53  | 0.81  | 2.24  | 3.E-05 | 0.01   | LC/MS Pos Late  | 1057           | 314.23 | NA 98930-66-6            |                         |
| cis-urocanate                                                   | Amino Acid                        | Histidine Metabolism                                         | 0.13  | 0.86 | -1.19 | -3.02 | 6.84  | 0.20   | 0.58 | -1.22 | -3.02 | 0.58  | 0.18   | 0.60 | -0.31 | -1.42 | 0.81  | 0.59   | 0.84   | -0.33 | -1.42 | 0.75  | 0.55   | 0.85   | LC/MS Neg       | 1200           | 137.04 | 1549103 7699-35-6        |                         |
| citrate                                                         | Energy                            | TCA Cycle                                                    | 0.00  | 0.37 | 0.64  | -3.56 | 4.84  | 0.77   | 0.91 | 0.49  | -3.64 | 4.62  | 0.82   | 0.93 | 1.59  | -0.96 | 4.14  | 0.22   | 0.60   | 1.47  | -1.02 | 3.95  | 0.25   | 0.70   | LC/MS Neg       | 582            | 191.02 | 311 77-92-9 C00158       |                         |
| citrulline                                                      | Amino Acid                        | Urea cycle; Arginine and Proline Metabolism                  | 0.01  | 0.34 | 3.24  | -1.57 | 8.06  | 0.19   | 0.55 | 4.23  | -0.52 | 8.98  | 0.08   | 0.44 | -0.30 | -3.23 | 2.64  | 0.84   | 0.95   | 0.43  | -2.44 | 3.30  | 0.77   | 0.92   | LC/MS Pos Early | 1520           | 176.10 | 9750 372-75-8 C00327     |                         |
| corticosterone                                                  | Lipid                             | Corticosteroids                                              | -0.56 | 1.44 | -1.21 | -2.26 | -0.17 | 0.02   | 0.21 | -0.82 | -1.87 | 0.24  | 0.13   | 0.53 | -1.39 | -2.02 | -0.76 | 2.E-05 | 4.E-03 | -1.11 | -1.74 | -0.48 | 6.E-04 | 0.03   | LC/MS Neg       | 5040           | 345.21 | 5753 50-22-6 C02140      |                         |
| cortisol                                                        | Lipid                             | Corticosteroids                                              | -0.13 | 0.79 | -0.13 | -2.05 | 1.79  | 0.90   | 0.96 | 0.48  | -1.43 | 2.39  | 0.62   | 0.85 | -0.49 | -1.65 | 0.68  | 0.41   | 0.74   | -0.04 | -1.19 | 1.11  | 0.95   | 0.98   | LC/MS Neg       | 4710           | 361.20 | 5754 50-23-7 C00735      |                         |
| cortisone                                                       | Lipid                             | Corticosteroids                                              | -0.12 | 0.72 | 0.18  | -1.93 | 2.30  | 0.87   | 0.94 | 0.49  | -1.60 | 2.57  | 0.65   | 0.86 | -0.52 | -1.81 | 0.76  | 0.42   | 0.74   | -0.29 | -1.55 | 0.96  | 0.65   | 0.88   | LC/MS Neg       | 4575           | 359.19 | 222786 53-06-5 C00762    |                         |
| cortolone glucuronide (1)                                       | Lipid                             | Corticosteroids                                              | -0.19 | 0.83 | 2.67  | 0.83  | 4.52  | 5.E-03 | 0.09 | 1.81  | -0.09 | 3.71  | 0.06   | 0.41 | 2.33  | 1.22  | 3.44  | 4.E-05 | 0.01   | 1.69  | 0.56  | 2.83  | 4.E-03 | 0.11   | LC/MS Neg       | 4606           | 541.27 | NA                       |                         |
| creatine                                                        | Amino Acid                        | Creatine Metabolism                                          | -0.09 | 0.71 | 1.06  | -1.27 | 3.39  | 0.37   | 0.72 | 0.45  | -1.87 | 2.76  | 0.71   | 0.89 | 0.47  | -0.95 | 1.89  | 0.51   | 0.81   | 0.00  | -1.39 | 1.40  | 0.99   | 1.00   | LC/MS Pos Early | 1947           | 132.08 | 586 57-00-1 C00300       |                         |
| creatinine                                                      | Amino Acid                        | Creatine Metabolism                                          | 0.01  | 0.24 | 12.16 | 2.00  | 22.32 | 0.02   | 0.19 | 12.40 | 2.42  | 22.39 | 0.02   | 0.19 | 5.87  | -0.32 | 12.06 | 0.06   | 0.35   | 6.01  | -0.01 | 12.03 | 0.05   | 0.36   | LC/MS Pos Early | 2055           | 114.07 | 588 60-27-5 C00791       |                         |
| cystathionine                                                   | Amino Acid                        | Methionine, Cysteine, SAM and Taurine Metabolism             | -0.11 | 0.86 | 1.98  | 0.09  | 3.86  | 0.04   | 0.28 | 1.72  | -0.14 | 3.57  | 0.07   | 0.43 | 0.76  | -0.39 | 1.91  | 0.19   | 0.57   | 0.56  | -0.56 | 1.68  | 0.33   | 0.75   | LC/MS Pos Early | 2270           | 223.07 | 439258 535-34-2 C02291   |                         |
| cysteine                                                        | Amino Acid                        | Methionine, Cysteine, SAM and Taurine Metabolism             | -0.05 | 0.53 | 2.01  | -0.90 | 4.91  | 0.17   | 0.54 | 1.58  | -1.29 | 4.45  | 0.28   | 0.69 | 2.06  | 0.30  | 3.82  | 0.02   | 0.19   | 1.73  | 0.01  | 3.46  | 0.05   | 0.35   | LC/MS Pos Early | 1475           | 122.03 | 5862 52-90-4;56-E C00097 |                         |
| cysteine s-sulfate                                              | Amino Acid                        | Methionine, Cysteine, SAM and Taurine Metabolism             | 0.01  | 0.40 | -3.30 | -7.02 | 4.42  | 0.08   | 0.37 | -3.13 | -     |       |        |      |       |       |       |        |        |       |       |       |        |        |                 |                |        |                          |                         |

|                                     |                                   |                                                      |       |      |       |       |      |      |      |       |       |      |      |      |       |       |      |      |      |       |       |      |      |      |                 |        |        |          |                     |
|-------------------------------------|-----------------------------------|------------------------------------------------------|-------|------|-------|-------|------|------|------|-------|-------|------|------|------|-------|-------|------|------|------|-------|-------|------|------|------|-----------------|--------|--------|----------|---------------------|
| gamma-CEHC glucuronide*             | Cofactors and Vitamins            | Tocopherol Metabolism                                | -0.40 | 1.17 | 0.95  | -0.41 | 2.31 | 0.17 | 0.54 | 0.54  | -0.81 | 1.90 | 0.43 | 0.77 | 0.53  | -0.30 | 1.35 | 0.21 | 0.59 | 0.21  | -0.60 | 1.03 | 0.61 | 0.88 | LC/MS Neg       | 2500   | 439.16 | NA       |                     |
| gamma-glutamyl-2-aminobutyrate      | Peptide                           | Gamma-glutamyl Amino Acid                            | -0.36 | 1.55 | 0.58  | -0.40 | 1.56 | 0.25 | 0.62 | 0.44  | -0.53 | 1.42 | 0.37 | 0.74 | 0.63  | 0.03  | 1.23 | 0.04 | 0.27 | 0.53  | -0.06 | 1.11 | 0.08 | 0.45 | LC/MS Pos Early | 2380   | 233.11 | NA       | 16869-42-4          |
| gamma-glutamylalanine               | Peptide                           | Gamma-glutamyl Amino Acid                            | -0.15 | 1.17 | 0.69  | -0.61 | 1.99 | 0.30 | 0.66 | 0.41  | -0.88 | 1.70 | 0.53 | 0.80 | 1.04  | 0.25  | 1.82 | 0.01 | 0.12 | 0.83  | 0.06  | 1.60 | 0.04 | 0.30 | LC/MS Pos Early | 1986   | 219.10 | 440103   | 5875-41-2           |
| gamma-glutamyl-alpha-lysine         | Peptide                           | Gamma-glutamyl Amino Acid                            | -0.07 | 0.75 | 0.81  | -1.22 | 2.83 | 0.43 | 0.75 | 0.44  | -1.57 | 2.44 | 0.67 | 0.88 | 1.12  | -0.11 | 2.35 | 0.08 | 0.38 | 0.83  | -0.37 | 2.04 | 0.17 | 0.61 | LC/MS Pos Early | 2784   | 276.16 | 65254    |                     |
| gamma-glutamylcitrulline*           | Peptide                           | Gamma-glutamyl Amino Acid                            | -0.15 | 1.07 | 0.67  | -0.75 | 2.10 | 0.35 | 0.70 | 0.65  | -0.75 | 2.05 | 0.36 | 0.74 | 0.69  | -0.17 | 1.55 | 0.12 | 0.47 | 0.67  | -0.17 | 1.51 | 0.12 | 0.54 | LC/MS Pos Early | 1644   | 305.15 | NA       |                     |
| gamma-glutamyl-epsilon-lysine       | Peptide                           | Gamma-glutamyl Amino Acid                            | -0.10 | 1.04 | 0.50  | -0.98 | 1.99 | 0.51 | 0.78 | 0.37  | -1.10 | 1.84 | 0.62 | 0.85 | 0.60  | -0.31 | 1.50 | 0.20 | 0.57 | 0.49  | -0.39 | 1.37 | 0.27 | 0.72 | LC/MS Pos Early | 2725   | 276.16 | 7015685  | 17105-15-6          |
| gamma-glutamylglutamate             | Peptide                           | Gamma-glutamyl Amino Acid                            | -0.05 | 0.88 | 0.92  | -0.84 | 2.68 | 0.31 | 0.66 | 0.73  | -1.01 | 2.46 | 0.41 | 0.76 | 0.52  | -0.55 | 1.59 | 0.34 | 0.69 | 0.37  | -0.68 | 1.42 | 0.49 | 0.84 | LC/MS Pos Early | 1775   | 277.10 | 92865    | 1116-22-9 C05282    |
| gamma-glutamylglutamine             | Peptide                           | Gamma-glutamyl Amino Acid                            | -0.35 | 1.50 | 0.32  | -0.69 | 1.33 | 0.53 | 0.79 | 0.37  | -0.63 | 1.36 | 0.47 | 0.78 | 0.48  | -0.13 | 1.09 | 0.12 | 0.47 | 0.52  | -0.08 | 1.11 | 0.09 | 0.48 | LC/MS Pos Early | 1430   | 276.12 | 150914   | 10148-81-9 C05283   |
| gamma-glutamylglycine               | Peptide                           | Gamma-glutamyl Amino Acid                            | -0.11 | 0.74 | 0.39  | -1.62 | 2.40 | 0.70 | 0.88 | 0.41  | -1.57 | 2.39 | 0.68 | 0.89 | 0.67  | -0.55 | 1.90 | 0.28 | 0.64 | 0.69  | -0.50 | 1.88 | 0.26 | 0.70 | LC/MS Pos Early | 1535   | 205.08 | 165527   | 1948-29-4           |
| gamma-glutamylhistidine             | Peptide                           | Gamma-glutamyl Amino Acid                            | -0.03 | 0.59 | 0.93  | -1.61 | 3.47 | 0.47 | 0.78 | 0.54  | -1.97 | 3.04 | 0.67 | 0.88 | 0.97  | -0.57 | 2.52 | 0.22 | 0.59 | 0.68  | -0.83 | 2.19 | 0.38 | 0.77 | LC/MS Pos Early | 2740   | 285.12 | 7017195  | 37460-15-4          |
| gamma-glutamylisoleucine*           | Peptide                           | Gamma-glutamyl Amino Acid                            | -0.09 | 0.76 | 1.40  | -0.60 | 3.41 | 0.17 | 0.54 | 0.73  | -1.28 | 2.74 | 0.47 | 0.78 | 0.56  | -0.67 | 1.78 | 0.37 | 0.72 | 0.03  | -1.18 | 1.24 | 0.96 | 0.98 | LC/MS Pos Early | 2940   | 261.14 | 14253342 |                     |
| gamma-glutamylleucine               | Peptide                           | Gamma-glutamyl Amino Acid                            | -0.02 | 0.62 | 1.40  | -1.05 | 3.85 | 0.26 | 0.63 | 0.55  | -1.90 | 3.00 | 0.66 | 0.88 | 0.99  | -0.50 | 2.47 | 0.19 | 0.57 | 0.34  | -1.14 | 1.81 | 0.65 | 0.88 | LC/MS Pos Early | 2991   | 261.14 | 151023   | 2566-39-4           |
| gamma-glutamylmethionine            | Peptide                           | Gamma-glutamyl Amino Acid                            | -0.15 | 0.89 | 1.16  | -0.54 | 2.86 | 0.18 | 0.55 | 0.87  | -0.80 | 2.55 | 0.31 | 0.71 | 1.24  | 0.22  | 2.27 | 0.02 | 0.17 | 1.03  | 0.02  | 2.03 | 0.05 | 0.35 | LC/MS Pos Early | 2640   | 279.10 | 7009567  | 17663-87-5          |
| gamma-glutamylphenylalanine         | Peptide                           | Gamma-glutamyl Amino Acid                            | -0.03 | 0.57 | 1.74  | -0.96 | 4.44 | 0.20 | 0.58 | 0.89  | -1.81 | 3.59 | 0.52 | 0.80 | 0.73  | -0.22 | 2.37 | 0.38 | 0.72 | 0.06  | -1.57 | 1.69 | 0.94 | 0.97 | LC/MS Pos Early | 2992   | 295.13 | 111299   | 7432-24-8           |
| gamma-glutamylthreonine             | Peptide                           | Gamma-glutamyl Amino Acid                            | -0.02 | 0.51 | 1.67  | -1.31 | 4.66 | 0.27 | 0.64 | 1.28  | -1.66 | 4.23 | 0.39 | 0.76 | 1.05  | -0.76 | 2.87 | 0.25 | 0.63 | 0.75  | -1.03 | 2.52 | 0.41 | 0.79 | LC/MS Pos Early | 1750   | 249.11 | 76078708 | 5652-48-2           |
| gamma-glutamyltyrosine              | Peptide                           | Gamma-glutamyl Amino Acid                            | -0.04 | 0.52 | 2.33  | -0.65 | 5.31 | 0.13 | 0.46 | 1.10  | -1.91 | 4.11 | 0.47 | 0.78 | 1.51  | -0.30 | 3.33 | 0.10 | 0.44 | 0.56  | -1.26 | 2.37 | 0.55 | 0.85 | LC/MS Neg       | 1240   | 309.11 | 94340    | 7432-23-7           |
| gamma-glutamylvaline                | Peptide                           | Gamma-glutamyl Amino Acid                            | -0.06 | 0.70 | 1.77  | -0.38 | 3.93 | 0.11 | 0.43 | 0.91  | -1.27 | 3.08 | 0.41 | 0.76 | 1.01  | -0.31 | 2.32 | 0.13 | 0.49 | 0.33  | -0.98 | 1.65 | 0.62 | 0.88 | LC/MS Pos Early | 2700   | 247.13 | 7015683  | 2746-34-1           |
| gamma-tocopherol/beta-tocopherol    | Cofactors and Vitamins            | Tocopherol Metabolism                                | -0.47 | 1.69 | 0.45  | -0.51 | 1.41 | 0.36 | 0.71 | 0.30  | -0.64 | 1.25 | 0.53 | 0.80 | 0.21  | -0.37 | 0.79 | 0.47 | 0.78 | 0.10  | -0.47 | 0.67 | 0.74 | 0.91 | LC/MS Pos Late  | 2384   | 416.36 | NA       |                     |
| gluconate                           | Xenobiotics                       | Food Component/Plant                                 | 0.08  | 0.82 | -1.01 | -2.95 | 0.94 | 0.31 | 0.67 | -1.34 | -3.26 | 0.58 | 0.17 | 0.59 | 0.31  | -0.87 | 1.50 | 0.60 | 0.84 | 0.06  | -1.10 | 1.22 | 0.92 | 0.96 | LC/MS Polar     | 2922   | 195.05 | 10690    | 527-07-1 C00257     |
| glucose                             | Carbohydrate                      | Glycolysis, Gluconeogenesis, and Pyruvate Metabolism | 0.02  | 0.30 | 4.97  | -0.04 | 9.98 | 0.05 | 0.31 | 3.32  | -1.71 | 8.34 | 0.20 | 0.61 | 3.86  | 0.82  | 6.89 | 0.01 | 0.14 | 2.61  | -0.41 | 5.63 | 0.09 | 0.48 | LC/MS Polar     | 2342   | 225.06 | 79025    | 50-99-7 C00031      |
| glucuronate                         | Carbohydrate                      | Aminosugar Metabolism                                | -0.04 | 0.69 | 2.35  | 0.05  | 4.64 | 0.05 | 0.29 | 2.05  | -0.21 | 4.32 | 0.08 | 0.44 | 0.86  | -0.54 | 2.26 | 0.23 | 0.61 | 0.64  | -0.73 | 2.00 | 0.36 | 0.75 | LC/MS Polar     | 3233.3 | 193.04 | 444791   | 207300-70-7 C00191  |
| glu-gly-asn-val**                   | Peptide                           | Polypeptide                                          | -0.19 | 1.21 | 0.40  | -0.89 | 1.70 | 0.54 | 0.80 | 2.02  | -1.06 | 1.50 | 0.74 | 0.90 | 0.33  | -0.46 | 1.12 | 0.41 | 0.74 | 0.19  | -0.58 | 0.96 | 0.63 | 0.88 | LC/MS Pos Early | 2655   | 418.19 | NA       |                     |
| glutamate                           | Amino Acid                        | Glutamate Metabolism                                 | 0.02  | 0.52 | 1.22  | -1.83 | 4.26 | 0.43 | 0.75 | 0.45  | -2.58 | 3.47 | 0.77 | 0.92 | 0.11  | -1.74 | 1.97 | 0.90 | 0.97 | -0.49 | -2.31 | 1.33 | 0.60 | 0.88 | LC/MS Pos Early | 1500   | 148.06 | 611      | 56-86-0 C00025      |
| glutamate, gamma-methyl ester       | Amino Acid                        | Glutamate Metabolism                                 | -0.04 | 0.44 | 1.92  | -1.56 | 5.40 | 0.28 | 0.64 | 2.30  | -1.13 | 5.73 | 0.19 | 0.61 | 0.70  | -1.42 | 2.82 | 0.52 | 0.81 | 0.97  | -1.09 | 3.04 | 0.35 | 0.75 | LC/MS Pos Early | 2170   | 162.08 | 68662    | 1499-55-4;1499-55-4 |
| glutamine                           | Amino Acid                        | Glutamate Metabolism                                 | -0.26 | 1.20 | 0.38  | -0.89 | 1.65 | 0.55 | 0.80 | 0.52  | -0.73 | 1.77 | 0.42 | 0.76 | 0.51  | -0.26 | 1.28 | 0.19 | 0.57 | 0.61  | -0.14 | 1.36 | 0.11 | 0.53 | LC/MS Pos Early | 1291   | 147.08 | 5961     | 56-85-9 C00064      |
| glutamine conjugate of C6H10O2 (1)* | Partially Characterized Molecules | Partially Characterized Molecules                    | -0.08 | 1.16 | 0.23  | -1.08 | 1.54 | 0.73 | 0.90 | 0.37  | -0.92 | 1.66 | 0.57 | 0.83 | 0.23  | -0.57 | 1.03 | 0.57 | 0.84 | 0.33  | -0.44 | 1.11 | 0.40 | 0.78 | LC/MS Neg       | 2406   | 241.12 | NA       |                     |
| glutamine conjugate of C6H10O2 (2)* | Partially Characterized Molecules | Partially Characterized Molecules                    | -0.18 | 1.71 | 0.35  | -0.55 | 1.26 | 0.44 | 0.75 | 0.33  | -0.55 | 1.22 | 0.46 | 0.77 | 0.55  | 0.01  | 1.10 | 0.05 | 0.30 | 0.54  | 0.00  | 1.07 | 0.05 | 0.35 | LC/MS Neg       | 2528   | 241.12 | NA       |                     |
| glutarate (C5-DC)                   | Lipid                             | Fatty Acid, Dicarboxylate                            | 0.03  | 0.88 | 0.86  | -0.89 | 2.61 | 0.33 | 0.69 | 0.99  | -0.73 | 2.72 | 0.26 | 0.68 | 0.44  | -0.62 | 1.51 | 0.41 | 0.74 | 0.55  | -0.49 | 1.58 | 0.30 | 0.74 | LC/MS Polar     | 2900   | 131.03 | 743      | 110-94-1 C00489     |
| glutaroylcarnitine (C5)             | Amino Acid                        | Lysine Metabolism                                    | 0.03  | 0.63 | 0.49  | -2.20 | 3.18 | 0.72 | 0.89 | 0.64  | -2.01 | 3.28 | 0.64 | 0.86 | 0.11  | -1.52 | 1.74 | 0.89 | 0.97 | 0.22  | -1.37 | 1.81 | 0.79 | 0.93 | LC/MS Pos Early | 2393   | 276.14 | 71464488 | 102636-82-8         |
| glycerate                           | Carbohydrate                      | Glycolysis, Gluconeogenesis, and Pyruvate Metabolism | -0.02 | 0.38 | -0.57 | -4.73 | 3.59 | 0.79 | 0.92 | -0.08 | -4.18 | 4.01 | 0.97 | 0.99 | -0.26 | -2.79 | 2.27 | 0.84 | 0.95 | 0.10  | -2.37 | 2.57 | 0.93 | 0.97 | LC/MS Polar     | 2070.4 | 105.02 | 752      | 600-19-1 C00258     |
| glycerol                            | Lipid                             | Glycerolipid Metabolism                              | 0.01  | 0.62 | 2.31  | -0.14 | 4.76 | 0.06 | 0.33 | 1.91  | -0.52 | 4.33 | 0.12 | 0.52 | 1.87  | -0.39 | 3.36 | 0.01 | 0.14 | 1.56  | 0.11  | 3.02 | 0.04 | 0.30 | LC/MS Neg       | 758    | 91.04  | 753      | 56-81-5 C00116      |
| glycerol 3-phosphate                | Lipid                             | Glycerolipid Metabolism                              | -0.19 | 1.09 | -0.79 | -2.22 | 0.64 | 0.28 | 0.65 | -0.46 | -1.88 | 0.95 | 0.52 | 0.80 | -0.34 | -1.21 | 0.53 | 0.44 | 0.75 | -0.10 | -0.95 | 0.75 | 0.82 | 0.94 | LC/MS Pos Early | 580    | 173.02 | 754      | 29849-82-9 C00093   |
| glycerophosphoethanolamine          | Lipid                             | Phospholipid Metabolism                              | 0.01  | 0.36 | -2.54 | -6.72 | 1.64 | 0.23 | 0.61 | -1.91 | -6.04 | 2.22 | 0.36 | 0.74 | -1.86 | -4.40 | 0.68 | 0.15 | 0.51 | -1.38 | -3.86 | 1.10 | 0.27 | 0.72 | LC/MS Pos Early | 659    | 216.06 | 123874   | 33049-08-0 C01233   |
| glycerophosphoglycerol              | Lipid                             | Glycerolipid Metabolism                              | -0.29 | 1.29 | -0.21 | -1.39 | 0.97 | 0.73 | 0.90 | -0.44 | -1.60 | 0.73 | 0.46 | 0.77 | -0.06 | -0.78 | 0.66 | 0.87 | 0.96 | -0.23 | -0.93 | 0.47 | 0.51 | 0.85 | LC/MS Polar     | 2430   | 245.04 | 439964   | C03274              |
| glycerophosphoinositol*             | Lipid                             | Phospholipid Metabolism                              | -0.17 | 0.71 | -0.86 | -3.02 | 1.30 | 0.43 | 0.75 | -0.39 | -2.53 | 1.75 | 0.72 | 0.90 | -0.10 | -1.41 | 1.22 | 0.89 | 0.97 | 0.27  | -1.02 | 1.55 | 0.68 | 0.89 | LC/MS Neg       | 630    | 333.06 | 167572   | 16824-65-0          |
| glycerophosphorylcholine (GPC)      | Lipid                             | Phospholipid Metabolism                              | 0.00  | 0.31 | 0.52  | -4.58 | 5.62 | 0.84 | 0.94 | 1.56  | -3.48 | 6.60 | 0.54 | 0.81 | 1.05  | -2.05 | 4.15 | 0.51 | 0.81 | 1.83  | -1.20 | 4.87 | 0.24 | 0.70 | LC/MS Pos Early | 672    | 258.11 | 71920    | 28319-77-9 C00670   |
| glycine                             | Amino Acid                        | Glycine, Serine and Threonine Metabolism             | 0.03  | 0.35 | -1.45 | -5.84 | 2.93 | 0.52 | 0.78 | -0.49 | -4.84 | 3.85 | 0.82 | 0.94 | -1.74 | -4.41 | 0.92 | 0.20 | 0.58 | -1.03 | -3.64 | 1.58 | 0.44 | 0.81 | LC/MS Pos Early | 1375   | 76.04  | 750      | 56-40-6 C00037      |
| glycine conjugate of C10H14O2 (1)*  | Partially Characterized Molecules | Partially Characterized Molecules                    | -0.65 | 1.54 | 0.57  | -0.45 | 1.59 | 0.27 | 0.64 | 0.27  | -0.75 | 1.29 | 0.60 | 0.84 | 0.44  | -0.18 | 1.06 | 0.16 | 0.54 | 0.21  | -0.40 | 0.83 | 0.49 | 0.84 | LC/MS Neg       | 4335   | 222.11 | NA       |                     |
| glycochenodeoxycholate              | Lipid                             | Primary Bile Acid Metabolism                         | 0.11  | 1.51 | -0.10 | -1.16 | 0.95 | 0.85 | 0.94 | 0.07  | -0.97 | 1.11 | 0.90 | 0.96 | -0.07 | -0    |      |      |      |       |       |      |      |      |                 |        |        |          |                     |

|                                              |                                   |                                                              |       |      |       |       |       |        |      |       |       |       |        |      |       |       |       |        |        |       |       |      |        |        |                 |        |        |          |             |        |
|----------------------------------------------|-----------------------------------|--------------------------------------------------------------|-------|------|-------|-------|-------|--------|------|-------|-------|-------|--------|------|-------|-------|-------|--------|--------|-------|-------|------|--------|--------|-----------------|--------|--------|----------|-------------|--------|
| leukotriene B4                               | Lipid                             | Eicosanoid                                                   | -0.37 | 2.04 | -0.36 | -1.12 | 0.41  | 0.36   | 0.71 | -0.41 | -1.17 | 0.35  | 0.29   | 0.69 | -0.17 | -0.64 | 0.29  | 0.46   | 0.77   | -0.21 | -0.67 | 0.24 | 0.36   | 0.75   | LC/MS Neg       | 5186   | 335.22 | 5280492  | 71160-24-2  | C02165 |
| lignoceryl sphingomyelin (d18:1/24:0)        | Lipid                             | Sphingomyelins                                               | -0.05 | 0.53 | 6.37  | 3.59  | 9.14  | 9.E-06 | 0.01 | 5.61  | 2.83  | 8.39  | 9.E-05 | 0.02 | 4.86  | 3.19  | 6.52  | 0.00   | 2.E-05 | 4.29  | 2.63  | 5.94 | 0.00   | 6.E-04 | LC/MS Pos Late  | 3437   | 815.70 | NA       | 60037-60-7  |        |
| lignocercylcarnitine (C24)*                  | Lipid                             | Fatty Acid Metabolism (Acyl Carnitine, Long Chain Saturated) | -0.01 | 0.63 | 2.35  | -0.04 | 4.74  | 0.05   | 0.32 | 1.79  | -0.59 | 4.16  | 0.14   | 0.55 | 1.97  | 0.52  | 3.42  | 0.01   | 0.11   | 1.54  | 0.11  | 2.96 | 0.03   | 0.30   | LC/MS Pos Late  | 1603   | 512.47 | NA       |             |        |
| linoleate (18:2n6)                           | Lipid                             | Long Chain Polyunsaturated Fatty Acid (n3 and n6)            | -0.05 | 0.64 | 2.85  | 0.54  | 5.16  | 0.02   | 0.17 | 2.58  | 0.29  | 4.86  | 0.03   | 0.26 | 2.66  | 1.27  | 4.06  | 2.E-04 | 0.01   | 2.46  | 1.09  | 3.82 | 4.E-04 | 0.03   | LC/MS Neg       | 5535   | 279.23 | 5280450  | 60-33-3     | C01595 |
| linolenate (18:3n3 or 3n6)                   | Lipid                             | Long Chain Polyunsaturated Fatty Acid (n3 and n6)            | -0.05 | 0.87 | 0.62  | -1.11 | 2.35  | 0.48   | 0.78 | 0.42  | -1.29 | 2.12  | 0.63   | 0.85 | 0.94  | -0.11 | 1.99  | 0.08   | 0.38   | 0.79  | -0.23 | 1.81 | 0.13   | 0.56   | LC/MS Neg       | 5450   | 277.22 | 5280934  |             | C06426 |
| linoleoyl ethanolamide                       | Lipid                             | Endocannabinoid                                              | 0.03  | 1.16 | 0.80  | -0.51 | 2.11  | 0.23   | 0.60 | 0.28  | -1.03 | 1.60  | 0.67   | 0.88 | 0.60  | -0.19 | 1.40  | 0.14   | 0.49   | 0.21  | -0.58 | 1.00 | 0.60   | 0.88   | LC/MS Neg       | 6150   | 322.28 | 5283446  | 68171-52-8  |        |
| linoleoylcarnitine (C18:2)*                  | Lipid                             | Fatty Acid Metabolism (Acyl Carnitine, Polyunsaturated)      | 0.01  | 0.50 | 3.23  | 0.02  | 6.44  | 0.05   | 0.30 | 3.98  | 0.81  | 7.14  | 0.01   | 0.18 | 1.56  | -0.40 | 3.52  | 0.12   | 0.47   | 2.10  | 0.18  | 4.01 | 0.03   | 0.29   | LC/MS Pos Late  | 1430   | 424.34 | 6450015  | 36816-10-1  |        |
| linoleoylcholine*                            | Lipid                             | Fatty Acid Metabolism (Acyl Choline)                         | -0.01 | 0.79 | -0.61 | -2.52 | 1.30  | 0.53   | 0.79 | -0.02 | -1.92 | 1.89  | 0.99   | 1.00 | -0.13 | -1.29 | 1.04  | 0.83   | 0.95   | 0.33  | -0.82 | 1.47 | 0.58   | 0.87   | LC/MS Pos Late  | 1388   | 366.34 | NA       |             |        |
| lysine                                       | Amino Acid                        | Lysine Metabolism                                            | 0.00  | 0.24 | 3.11  | -3.23 | 9.45  | 0.34   | 0.69 | 2.02  | -4.24 | 8.29  | 0.53   | 0.80 | 1.09  | -2.78 | 4.95  | 0.58   | 0.84   | 0.22  | -3.56 | 4.00 | 0.91   | 0.96   | LC/MS Pos Early | 2850   | 147.11 | 5962     | 56-87-1     | C00047 |
| malate                                       | Energy                            | TCA Cycle                                                    | 0.05  | 0.57 | 0.71  | -2.19 | 3.61  | 0.63   | 0.85 | 1.00  | -1.85 | 3.86  | 0.49   | 0.79 | 1.13  | -0.63 | 2.90  | 0.21   | 0.58   | 1.35  | -3.37 | 3.07 | 0.12   | 0.55   | LC/MS Neg       | 615.6  | 133.01 | 525      | 6915-15-7   | C00149 |
| maleate                                      | Lipid                             | Fatty Acid, Dicarboxylate                                    | 0.06  | 0.53 | 0.85  | -2.05 | 3.75  | 0.57   | 0.81 | 0.46  | -2.40 | 3.32  | 0.75   | 0.91 | 1.37  | -0.40 | 3.13  | 0.13   | 0.48   | 1.07  | -0.65 | 2.79 | 0.22   | 0.68   | LC/MS Polar     | 2640   | 115.00 | 444266   | 110-16-7    | C01384 |
| malonate                                     | Lipid                             | Fatty Acid Synthesis                                         | -0.25 | 1.29 | 0.42  | -0.78 | 1.62  | 0.50   | 0.78 | 0.17  | -1.01 | 1.36  | 0.77   | 0.92 | 0.51  | -0.21 | 1.24  | 0.17   | 0.54   | 0.34  | -0.38 | 1.05 | 0.36   | 0.75   | LC/MS Polar     | 3447   | 103.00 | 867      | 141-82-2;26 | C00383 |
| maltose                                      | Carbohydrate                      | Glycogen Metabolism                                          | 0.00  | 0.83 | -0.41 | -2.28 | 1.45  | 0.66   | 0.87 | -0.78 | -2.62 | 1.06  | 0.41   | 0.76 | -0.12 | -1.25 | 1.02  | 0.84   | 0.95   | -0.39 | -1.50 | 0.71 | 0.48   | 0.84   | LC/MS Polar     | 3329.4 | 387.11 | 10991489 | 6363-53-7   | C00208 |
| mannitol/sorbitol                            | Carbohydrate                      | Fructose, Mannose and Galactose Metabolism                   | 0.20  | 1.02 | 0.14  | -1.38 | 1.66  | 0.86   | 0.94 | 0.09  | -1.40 | 1.59  | 0.90   | 0.96 | 0.70  | -0.22 | 1.63  | 0.13   | 0.49   | 0.67  | -0.23 | 1.57 | 0.15   | 0.58   | LC/MS Polar     | 2320   | 181.07 | 5780     |             | C00794 |
| mannose                                      | Carbohydrate                      | Fructose, Mannose and Galactose Metabolism                   | -0.02 | 0.43 | 2.06  | -1.51 | 5.64  | 0.26   | 0.63 | 0.90  | -2.67 | 4.47  | 0.62   | 0.85 | 1.44  | -0.73 | 3.61  | 0.19   | 0.57   | 0.56  | -1.58 | 2.71 | 0.61   | 0.88   | LC/MS Polar     | 2200   | 225.06 | 18950    | 3458-28-4   | C00159 |
| margarate (17:0)                             | Lipid                             | Long Chain Saturated Fatty Acid                              | 0.04  | 0.52 | 2.60  | -0.24 | 5.44  | 0.07   | 0.35 | 2.29  | -0.51 | 5.09  | 0.11   | 0.50 | 2.01  | 0.29  | 3.74  | 0.02   | 0.19   | 1.77  | 0.09  | 3.46 | 0.04   | 0.32   | LC/MS Neg       | 5731   | 269.25 | 10465    | 506-12-7    |        |
| metabolonic lactone sulfate                  | Partially Characterized Molecules | Partially Characterized Molecules                            | -0.03 | 1.10 | 1.30  | -0.08 | 2.67  | 0.06   | 0.33 | 4.47  | -0.96 | 1.90  | 0.52   | 0.80 | 1.00  | 0.16  | 1.83  | 0.02   | 0.17   | 0.37  | -0.49 | 1.23 | 0.40   | 0.78   | LC/MS Neg       | 4800   | 427.21 | NA       |             |        |
| methionine                                   | Amino Acid                        | Methionine, Cysteine, SAM and Taurine Metabolism             | -0.01 | 0.30 | 2.50  | -2.68 | 7.69  | 0.34   | 0.69 | 1.75  | -3.37 | 6.87  | 0.50   | 0.79 | 2.21  | -0.95 | 5.36  | 0.17   | 0.54   | 1.62  | -1.46 | 4.70 | 0.30   | 0.74   | LC/MS Pos Early | 2526   | 150.06 | 6137     | 63-68-3     | C00073 |
| methionine sulfone                           | Amino Acid                        | Methionine, Cysteine, SAM and Taurine Metabolism             | -0.01 | 0.72 | 0.46  | -1.77 | 2.69  | 0.69   | 0.87 | 4.00  | -1.79 | 2.59  | 0.72   | 0.90 | -0.77 | -2.13 | 0.58  | 0.26   | 0.63   | -0.81 | -2.13 | 0.51 | 0.23   | 0.69   | LC/MS Pos Early | 1250   | 182.05 | 69961    | 820-10-0    |        |
| methionine sulfoxide                         | Amino Acid                        | Methionine, Cysteine, SAM and Taurine Metabolism             | 0.02  | 0.62 | -1.47 | -4.00 | 1.07  | 0.26   | 0.63 | -1.28 | -3.78 | 1.22  | 0.31   | 0.72 | -0.97 | -2.50 | 0.57  | 0.22   | 0.59   | -0.82 | -2.32 | 0.68 | 0.28   | 0.72   | LC/MS Pos Early | 1272   | 166.05 | 158980   | 3226-65-1   | C02989 |
| methyl glucopyranoside (alpha + beta)        | Xenobiotics                       | Food Component/Plant                                         | 0.01  | 1.20 | 0.61  | -0.68 | 1.89  | 0.36   | 0.71 | 1.00  | -0.28 | 2.27  | 0.13   | 0.52 | -0.06 | -0.84 | 0.72  | 0.88   | 0.97   | 0.23  | -0.54 | 1.00 | 0.56   | 0.86   | LC/MS Neg       | 1070   | 193.07 | NA       |             |        |
| methyl-4-hydroxybenzoate sulfate             | Xenobiotics                       | Benzoate Metabolism                                          | 0.27  | 2.34 | -0.34 | -1.03 | 3.35  | 0.33   | 0.68 | -0.31 | -0.98 | 0.37  | 0.37   | 0.74 | -0.13 | -0.55 | 0.29  | 0.54   | 0.82   | -0.11 | -0.51 | 0.30 | 0.60   | 0.88   | LC/MS Neg       | 2873   | 231.00 | NA       |             |        |
| methylaphthyl sulfate (2)*                   | Xenobiotics                       | Chemical                                                     | -1.13 | 2.68 | 0.31  | -0.38 | 0.99  | 0.38   | 0.72 | 0.24  | -0.43 | 0.92  | 0.48   | 0.78 | -0.08 | -0.50 | 0.34  | 0.71   | 0.90   | -0.13 | -0.54 | 0.28 | 0.53   | 0.85   | LC/MS Neg       | 4163   | 237.02 | NA       |             |        |
| methylsuccinate                              | Amino Acid                        | Leucine, Isoleucine and Valine Metabolism                    | 0.02  | 0.54 | 0.31  | -2.52 | 3.13  | 0.83   | 0.94 | -0.11 | -2.89 | 2.68  | 0.94   | 0.98 | 0.83  | -0.88 | 2.55  | 0.34   | 0.69   | 0.53  | -1.14 | 2.21 | 0.53   | 0.85   | LC/MS Polar     | 2800   | 131.03 | 10349    | 498-21-5    |        |
| myo-inositol                                 | Lipid                             | Inositol Metabolism                                          | -0.15 | 0.80 | 0.92  | -1.06 | 2.90  | 0.36   | 0.71 | 1.00  | -0.95 | 2.95  | 0.32   | 0.72 | 0.29  | -0.92 | 1.49  | 0.64   | 0.86   | 0.35  | -0.83 | 1.52 | 0.56   | 0.86   | LC/MS Polar     | 3506.3 | 225.06 | 892      | 87-89-8     | C00137 |
| myristate (14:0)                             | Lipid                             | Long Chain Saturated Fatty Acid                              | 0.04  | 0.50 | 4.58  | 1.57  | 7.58  | 3.E-03 | 0.07 | 4.17  | 1.20  | 7.13  | 0.01   | 0.12 | 2.84  | 1.02  | 4.67  | 2.E-03 | 0.05   | 2.54  | 0.75  | 4.32 | 0.01   | 0.13   | LC/MS Neg       | 5440   | 227.20 | 11005    | 544-63-8    | C06424 |
| myristoleate (14:1n5)                        | Lipid                             | Long Chain Monounsaturated Fatty Acid                        | 0.00  | 0.82 | 2.51  | 0.69  | 4.33  | 0.01   | 0.12 | 2.67  | 0.88  | 4.46  | 4.E-03 | 0.11 | 1.43  | 0.32  | 2.54  | 0.01   | 0.13   | 1.56  | 0.48  | 2.64 | 5.E-03 | 0.12   | LC/MS Neg       | 5346.9 | 225.19 | 5281119  | 544-64-9    | C08322 |
| myristoleoylcarnitine (C14:1)*               | Lipid                             | Fatty Acid Metabolism (Acyl Carnitine, Monounsaturated)      | 0.00  | 1.01 | 1.52  | 0.01  | 3.02  | 0.05   | 0.30 | 1.87  | 0.38  | 3.35  | 0.01   | 0.18 | 1.16  | 0.25  | 2.07  | 0.01   | 0.14   | 1.42  | 0.53  | 2.31 | 2.E-03 | 0.08   | LC/MS Pos Late  | 1316   | 370.29 | 90659872 | 889848-55-9 |        |
| myristoyl dihydroxyphenylethanol             | Lipid                             | Dihydroxyphenylethanol                                       | -0.07 | 0.62 | 3.16  | 0.69  | 5.62  | 0.01   | 0.14 | 2.25  | -0.24 | 4.74  | 0.08   | 0.44 | 2.08  | 0.58  | 3.58  | 0.01   | 0.10   | 1.37  | -0.13 | 2.87 | 0.07   | 0.44   | LC/MS Pos Late  | 2060   | 677.56 | NA       |             |        |
| myristoylcarnitine (C14)                     | Lipid                             | Fatty Acid Metabolism (Acyl Carnitine, Long Chain Saturated) | -0.12 | 0.90 | 2.96  | 1.27  | 4.64  | 6.E-04 | 0.03 | 3.01  | 1.35  | 4.66  | 4.E-04 | 0.05 | 2.19  | 1.17  | 3.21  | 3.E-05 | 4.E-03 | 2.22  | 1.22  | 3.21 | 1.E-05 | 4.E-03 | LC/MS Pos Late  | 1350   | 372.31 | 6426854  | 18822-89-4  |        |
| N(6),N(6)-dimethyllysine                     | Amino Acid                        | Lysine Metabolism                                            | -0.06 | 0.89 | -0.88 | -2.62 | 0.86  | 0.32   | 0.67 | -0.72 | -2.44 | 0.99  | 0.41   | 0.76 | -0.82 | -1.87 | 0.24  | 0.13   | 0.49   | -0.70 | -1.73 | 0.33 | 0.18   | 0.62   | LC/MS Pos Early | 2833   | 175.14 | NA       |             |        |
| N,N,N-trimethyl-5-aminovaleate               | Amino Acid                        | Urea cycle: Arginine and Proline Metabolism                  | 0.02  | 0.68 | 1.26  | -1.01 | 3.53  | 0.28   | 0.64 | 1.31  | -0.92 | 3.55  | 0.25   | 0.66 | -0.39 | -1.77 | 0.99  | 0.58   | 0.84   | -0.35 | -1.69 | 1.00 | 0.61   | 0.88   | LC/MS Pos Early | 2186   | 160.13 | NA       |             |        |
| N,N,N-trimethyl-alanylproline betaine (TMAP) | Amino Acid                        | Urea cycle: Arginine and Proline Metabolism                  | -0.01 | 0.39 | 4.77  | -0.07 | 9.62  | 0.05   | 0.32 | 4.56  | -0.20 | 9.33  | 0.06   | 0.40 | 2.02  | -0.94 | 4.97  | 0.18   | 0.56   | 1.85  | -1.02 | 4.73 | 0.21   | 0.66   | LC/MS Pos Early | 2344   | 229.15 | NA       |             |        |
| N,N-dimethylalanine                          | Amino Acid                        | Alanine and Aspartate Metabolism                             | -0.18 | 1.08 | -0.10 | -1.54 | 1.34  | 0.89   | 0.96 | 0.19  | -1.24 | 1.61  | 0.80   | 0.93 | -0.66 | -1.53 | 0.22  | 0.14   | 0.49   | -0.44 | -1.30 | 0.41 | 0.31   | 0.74   | LC/MS Pos Early | 1378   | 118.09 | NA       |             |        |
| N,N-dimethyl-pro                             | Peptide                           | Modified Peptides                                            | 0.00  | 0.35 | 7.62  | 1.83  | 13.40 | 0.01   | 0.13 | 7.90  | 2.21  | 13.58 | 0.01   | 0.13 | 1.67  | -1.88 | 5.22  | 0.35   | 0.70   | 1.88  | -1.57 | 5.34 | 0.28   | 0.72   | LC/MS Pos Early | 2402   | 241.15 | NA       |             |        |
| N1-Methyl-2-pyridone-5-carboxamide           | Cofactors and Vitamins            | Nicotinate and Nicotinamide Metabolism                       | -0.09 | 0.91 | 1.66  | -0.06 | 3.39  | 0.06   | 0.33 | 1.03  | -0.71 | 2.76  | 0.24   | 0.66 | 0.35  | -0.70 | 1.40  | 0.52   | 0.81   | -0.18 | -1.22 | 0.87 | 0.74   | 0.91   | LC/MS Pos Early | 1250   | 153.07 | 69698    | 701-44-0    | C05842 |
| N1-Methyl-4-pyridone-3-carboxamide           | Cofactors and Vitamins            | Nicotinate and Nicotinamide Metabolism                       | -0.21 | 1.10 | 0.93  | -0.46 | 2.31  | 0.19   | 0.56 | 0.47  | -0.91 | 1.86  | 0.50   | 0.79 | 0.34  | -0.51 | 1.19  | 0.43   | 0.75   | -0.01 | -0.85 | 0.82 | 0.97   | 0.99   | LC/MS Pos Early | 1260   | 153.07 | 440810   | 769-49-3    | C05843 |
| N1-methylinosine                             | Nucleotide                        | Purine Metabolism, (Hypo)Xanthine/Inosine containing         | -0.01 | 0.47 | 2.94  | -0.64 | 6.52  | 0.11   | 0.43 | 2.88  | -0.64 | 6.40  | 0.11   | 0.50 | 0.43  | -1.75 | 2.62  | 0.70   | 0.90   | 0.39  | -1.74 | 2.51 | 0.72   | 0.90   | LC/MS Pos Early | 1430   | 283.10 | 65095    | 20245-33-4  |        |
| N2,N2-dimethylguanosine                      | Nucleotide                        | Purine Metabolism, Guanine containing                        | 0.00  | 0.35 | 8.74  | 3.99  | 13.49 | 3.E-04 | 0.02 | 8.09  | 3.40  | 12.78 | 8.E-04 | 0.06 | 3.27  | 0.35  | 6.18  | 0.03   | 0.23   | 2.76  | -0.09 | 5.61 | 0.06   | 0.39   | LC/MS Pos Early | 2210   | 312.13 | 92919    | 2140-67-2   |        |
| N2,N5-diacetylornithine                      | Amino Acid                        | Urea cycle: Arginine and Proline Metabolism                  | -0.28 | 1.09 | 0.55  | -0.99 | 2.09  | 0.49   | 0.78 | 0.78  | -0.74 | 2.30  | 0.31   | 0.72 | -0.72 | -1.65 | 0.22  | 0.13   | 0.49   | -0.54 | -1.46 | 0.37 | 0.24   | 0.70   | LC/MS Neg       | 1367   | 215.10 | 10398396 | 39825-23-5  |        |
| N2-acetyl,N6,N6-dimethyllysine               | Amino Acid                        | Lysine Metabolism                                            | 0.13  | 1.26 | -0.71 | -1.93 | 0.51  | 0.25   | 0.63 | -0.50 | -1.70 | 0.70  | 0.42   | 0.76 | -0.82 | -1.56 | -0.08 | 0.03   | 0.23   | -0.66 | -1.38 | 0.06 | 0.07   | 0.44   | LC/MS Pos Early | 2180   | 217.15 | NA       |             |        |
| N2-acetyllysine                              | Amino Acid                        | Lysine Metabolism                                            | -0.23 | 0.78 | 2.13  | 0.11  | 4.16  | 0.04   | 0.27 | 2.02  | 0.03  | 4.02  | 0.05   | 0.35 | 0.59  | -0.65 | 1.83  | 0.35   | 0.70   | 0.50  | -0.70 | 1.71 | 0.41   | 0.79   | LC/MS Polar     | 3372.6 | 187.11 | 92907    | 1946-82-3   | C12989 |
|                                              |                                   |                                                              |       |      |       |       |       |        |      |       |       |       |        |      |       |       |       |        |        |       |       |      |        |        |                 |        |        |          |             |        |

|                                                        |                        |                                                              |       |      |       |       |       |        |      |       |       |       |        |      |       |       |       |        |      |       |       |       |        |      |                 |        |        |          |                     |
|--------------------------------------------------------|------------------------|--------------------------------------------------------------|-------|------|-------|-------|-------|--------|------|-------|-------|-------|--------|------|-------|-------|-------|--------|------|-------|-------|-------|--------|------|-----------------|--------|--------|----------|---------------------|
| oleoylcarnitine (C18)                                  | Lipid                  | Fatty Acid Metabolism (Acyl Carnitine, Monounsaturated)      | 0.01  | 0.48 | 1.58  | -1.68 | 4.83  | 0.34   | 0.69 | 2.08  | -1.13 | 5.28  | 0.20   | 0.62 | 0.84  | -1.15 | 2.82  | 0.41   | 0.74 | 1.20  | -0.73 | 3.14  | 0.22   | 0.68 | LC/MS Pos Late  | 1423   | 426.36 | 6441392  | 38677-66-6          |
| oleoylcholine                                          | Lipid                  | Fatty Acid Metabolism (Acyl Choline)                         | -0.02 | 0.84 | -0.75 | -2.58 | 1.09  | 0.43   | 0.75 | -0.13 | -1.97 | 1.70  | 0.89   | 0.96 | -0.59 | -1.70 | 0.53  | 0.30   | 0.66 | -0.13 | -1.23 | 0.98  | 0.82   | 0.94 | LC/MS Pos Late  | 1449   | 368.35 | NA       |                     |
| ornithine                                              | Amino Acid             | Urea cycle; Arginine and Proline Metabolism                  | 0.00  | 0.48 | 1.42  | -1.97 | 4.81  | 0.41   | 0.74 | 1.48  | -1.85 | 4.82  | 0.88   | 0.75 | -0.35 | -2.41 | 1.72  | 0.74   | 0.91 | -0.31 | -2.32 | 1.70  | 0.76   | 0.92 | LC/MS Pos Early | 2800   | 133.10 | 6262     | 3184-13-2 C00077    |
| orotate                                                | Nucleotide             | Pyrimidine Metabolism, Orotate containing                    | 0.03  | 0.50 | 0.01  | -3.06 | 3.08  | 0.99   | 1.00 | 0.66  | -2.38 | 3.70  | 0.67   | 0.88 | 0.43  | -1.44 | 2.30  | 0.65   | 0.87 | 0.92  | -0.91 | 2.75  | 0.32   | 0.75 | LC/MS Polar     | 1638.1 | 155.01 | 967      | 50887-69-9 C00295   |
| orotidine                                              | Nucleotide             | Pyrimidine Metabolism, Orotate containing                    | -0.03 | 0.50 | 3.35  | -0.28 | 6.97  | 0.07   | 0.35 | 2.68  | -0.90 | 6.26  | 0.14   | 0.55 | 0.06  | -2.15 | 2.27  | 0.96   | 0.89 | -0.48 | -2.64 | 1.69  | 0.67   | 0.89 | LC/MS Polar     | 2250   | 287.05 | 92751    | 314-50-9            |
| O-sulfo-L-tyrosine                                     | Xenobiotics            | Chemical                                                     | 0.01  | 0.41 | 4.42  | 0.30  | 5.54  | 0.04   | 0.27 | 4.36  | 0.31  | 8.42  | 0.04   | 0.30 | 1.43  | -1.09 | 3.95  | 0.27   | 0.63 | 1.38  | -1.07 | 3.83  | 0.27   | 0.71 | LC/MS Neg       | 990    | 260.02 | 514186   |                     |
| oxalate (ethanedioate)                                 | Cofactors and Vitamins | Ascorbate and Aldarate Metabolism                            | -0.01 | 0.43 | -1.93 | -5.58 | 1.72  | 0.30   | 0.66 | -1.49 | -5.09 | 2.11  | 0.42   | 0.76 | -1.43 | -3.65 | 0.79  | 0.21   | 0.58 | -1.10 | -3.26 | 1.07  | 0.32   | 0.75 | LC/MS Neg       | 603    | 88.99  | 971      | 144-62-7 C00209     |
| oxindolylalanine                                       | Amino Acid             | Tryptophan Metabolism                                        | -0.04 | 0.48 | -1.07 | -4.18 | 2.05  | 0.50   | 0.78 | -1.93 | -5.02 | 1.16  | 0.22   | 0.64 | -0.28 | -2.18 | 1.61  | 0.77   | 0.92 | -0.93 | -2.79 | 0.93  | 0.32   | 0.75 | LC/MS Pos Early | 2755   | 221.09 | NA       |                     |
| palmitate (16:0)                                       | Lipid                  | Long Chain Saturated Fatty Acid                              | 0.00  | 0.47 | 4.50  | 1.37  | 7.63  | 5.E-03 | 0.09 | 3.97  | 0.88  | 7.07  | 0.01   | 0.18 | 3.52  | 1.63  | 5.42  | 3.E-04 | 0.01 | 3.13  | 1.27  | 4.98  | 1.E-03 | 0.05 | LC/MS Neg       | 5618   | 255.23 | 985      | 57-10-3 C00249      |
| palmitoleate (16:1n7)                                  | Lipid                  | Long Chain Monounsaturated Fatty Acid                        | 0.00  | 0.82 | 2.69  | 0.86  | 4.51  | 4.E-03 | 0.09 | 2.58  | 0.78  | 4.38  | 0.01   | 0.12 | 1.79  | 0.68  | 2.90  | 2.E-03 | 0.04 | 1.71  | 0.63  | 2.79  | 2.E-03 | 0.08 | LC/MS Neg       | 5475   | 253.22 | 445638   | 373-49-9 C08362     |
| palmitoleoylcarnitine (C16:1)*                         | Lipid                  | Fatty Acid Metabolism (Acyl Carnitine, Monounsaturated)      | -0.02 | 0.74 | 2.37  | 0.31  | 4.43  | 0.02   | 0.21 | 2.63  | 0.60  | 4.66  | 0.01   | 0.17 | 1.66  | 0.41  | 2.91  | 0.01   | 0.11 | 1.85  | 0.63  | 3.07  | 3.E-03 | 0.11 | LC/MS Pos Late  | 1357   | 398.33 | 71464547 |                     |
| palmitoyl dihydroshpingomyelin (d18:0/16:0)*           | Lipid                  | Dihydroshpingomyelins                                        | -0.01 | 0.35 | 5.66  | 1.18  | 10.14 | 0.01   | 0.15 | 5.66  | 1.16  | 9.97  | 0.01   | 0.18 | 4.02  | 1.30  | 6.74  | 4.E-03 | 0.08 | 3.94  | 1.29  | 6.59  | 4.E-03 | 0.11 | LC/MS Pos Late  | 2290   | 705.59 | 9939965  |                     |
| palmitoyl ethanolamide                                 | Lipid                  | Endocannabinoid                                              | -0.01 | 0.59 | 2.46  | -0.15 | 5.07  | 0.07   | 0.33 | 1.80  | -0.79 | 4.40  | 0.17   | 0.59 | 1.44  | -0.15 | 3.03  | 0.08   | 0.38 | 0.93  | -0.63 | 2.50  | 0.24   | 0.70 | LC/MS Neg       | 6300   | 298.28 | 4671     | 544-31-0 C16512     |
| palmitoyl sphingomyelin (d18:1/16:0)                   | Lipid                  | Sphingomyelins                                               | -0.02 | 0.22 | 7.12  | 0.10  | 14.14 | 0.05   | 0.29 | 7.99  | 1.09  | 14.90 | 0.02   | 0.24 | 5.16  | 0.90  | 9.43  | 0.02   | 0.17 | 5.81  | 1.66  | 9.96  | 0.01   | 0.13 | LC/MS Pos Late  | 2168   | 703.57 | 9939941  | 6254-89-3           |
| palmitoylcarnitine (C16)                               | Lipid                  | Fatty Acid Metabolism (Acyl Carnitine, Long Chain Saturated) | 0.01  | 0.45 | 7.26  | 3.97  | 10.56 | 2.E-05 | 0.01 | 6.95  | 3.71  | 10.20 | 3.E-05 | 0.02 | 3.63  | 1.60  | 5.65  | 5.E-04 | 0.02 | 3.37  | 1.40  | 5.34  | 9.E-04 | 0.05 | LC/MS Pos Late  | 1425   | 400.34 | 461      | 6865-14-1 C02990    |
| palmitoylcholine                                       | Lipid                  | Fatty Acid Metabolism (Acyl Choline)                         | -0.02 | 0.79 | -0.08 | -2.02 | 1.87  | 0.94   | 0.98 | 0.46  | -1.47 | 2.39  | 0.64   | 0.86 | -0.16 | -1.34 | 1.03  | 0.80   | 0.93 | 0.24  | -0.92 | 1.40  | 0.69   | 0.89 | LC/MS Pos Late  | 1482   | 342.34 | 151731   |                     |
| palmitoyl-sphingosine-phosphoethanolamine (d18:1/16:0) | Lipid                  | Ceramide Pes                                                 | -0.43 | 0.95 | 0.84  | -0.85 | 2.53  | 0.33   | 0.68 | 0.91  | -0.75 | 2.57  | 0.28   | 0.69 | 0.31  | -0.72 | 1.34  | 0.55   | 0.83 | 0.37  | -0.63 | 1.37  | 0.47   | 0.83 | LC/MS Pos Late  | 2172   | 661.53 | NA       |                     |
| pantothenate (Vitamin B5)                              | Cofactors and Vitamins | Pantothenate and CoA Metabolism                              | 0.00  | 0.39 | 7.77  | 3.63  | 11.91 | 3.E-04 | 0.02 | 6.86  | 2.74  | 10.97 | 1.E-03 | 0.06 | 2.73  | 0.18  | 5.28  | 0.04   | 0.26 | 1.98  | -0.53 | 4.48  | 0.12   | 0.55 | LC/MS Neg       | 1498.7 | 218.10 | 6613     | 137-08-6 C00864     |
| p-cresol glucuronide*                                  | Amino Acid             | Tyrosine Metabolism                                          | -0.38 | 2.14 | -0.52 | -1.23 | 0.19  | 0.15   | 0.50 | -0.45 | -1.15 | 0.26  | 0.21   | 0.64 | -0.40 | -0.83 | 0.04  | 0.07   | 0.37 | -0.34 | -0.77 | 0.08  | 0.11   | 0.53 | LC/MS Neg       | 2420   | 283.08 | 154035   | 17680-99-8          |
| p-cresol sulfate                                       | Xenobiotics            | Benzoate Metabolism                                          | -0.24 | 1.51 | -1.46 | -2.47 | 0.44  | 0.01   | 0.09 | -1.28 | -2.29 | -0.27 | 0.01   | 0.18 | -1.01 | -1.62 | -0.39 | 1.E-03 | 0.04 | -0.87 | -1.48 | -0.27 | 5.E-03 | 0.12 | LC/MS Neg       | 2890   | 187.01 | 4615423  | 3233-57-7           |
| pelargonate (9:0)                                      | Lipid                  | Medium Chain Fatty Acid                                      | 0.03  | 0.30 | -0.68 | -5.85 | 4.48  | 0.79   | 0.92 | -0.87 | -5.95 | 4.21  | 0.74   | 0.90 | -2.37 | -5.51 | 0.76  | 0.14   | 0.49 | -2.51 | -5.56 | 0.54  | 0.11   | 0.53 | LC/MS Neg       | 4798   | 157.12 | 8158     | 112-05-0 C01601     |
| pentadecanoate (15:0)                                  | Lipid                  | Long Chain Saturated Fatty Acid                              | -0.01 | 0.30 | 2.86  | -2.06 | 7.78  | 0.25   | 0.63 | 2.56  | -2.28 | 7.39  | 0.30   | 0.70 | 1.49  | -1.50 | 4.48  | 0.33   | 0.69 | 1.26  | -1.65 | 4.18  | 0.40   | 0.78 | LC/MS Neg       | 5521   | 241.22 | 13849    | 1002-84-2;11 C16537 |
| perfluorooctanesulfonate (PFOS)                        | Xenobiotics            | Chemical                                                     | 0.01  | 1.37 | -1.66 | -2.96 | 0.37  | 0.01   | 0.14 | -1.70 | -2.98 | -0.43 | 0.01   | 0.15 | -0.85 | -1.64 | -0.06 | 0.03   | 0.26 | -0.88 | -1.65 | -0.11 | 0.02   | 0.27 | LC/MS Neg       | 5233   | 498.93 | 74483    | 1763-23-1 C18142    |
| perfluorooctanoate (PFOA)                              | Xenobiotics            | Chemical                                                     | -0.07 | 0.79 | -0.32 | -2.32 | 1.67  | 0.75   | 0.90 | -0.60 | -2.57 | 1.37  | 0.55   | 0.81 | -1.04 | -2.25 | 0.17  | 0.09   | 0.41 | -1.26 | -2.44 | -0.08 | 0.04   | 0.31 | LC/MS Neg       | 5130   | 412.97 | 9554     |                     |
| phenol sulfate                                         | Amino Acid             | Tyrosine Metabolism                                          | 0.06  | 0.86 | 0.57  | -1.21 | 2.35  | 0.53   | 0.79 | 0.54  | -1.21 | 2.29  | 0.54   | 0.81 | 0.67  | -0.41 | 1.76  | 0.22   | 0.60 | 0.65  | -0.41 | 1.70  | 0.23   | 0.69 | LC/MS Neg       | 2156   | 172.99 | 74426    | 937-34-8 C02180     |
| phenylacetylglutamine                                  | Peptide                | Acetylated Peptides                                          | -0.02 | 1.16 | -1.16 | -2.53 | 2.00  | 0.09   | 0.40 | -1.10 | -2.44 | 0.24  | 0.11   | 0.50 | -0.95 | -1.78 | -0.12 | 0.02   | 0.20 | -0.90 | -1.71 | -1.00 | 0.03   | 0.28 | LC/MS Neg       | 2330   | 263.10 | 92258    | 28047-15-6 C04148   |
| phenylalanine                                          | Amino Acid             | Phenylalanine Metabolism                                     | 0.01  | 0.24 | 3.52  | -3.03 | 10.07 | 0.29   | 0.66 | 1.75  | -4.76 | 8.27  | 0.60   | 0.84 | 2.66  | -1.32 | 6.65  | 0.19   | 0.57 | 1.29  | -2.63 | 5.21  | 0.52   | 0.85 | LC/MS Pos Early | 2878   | 166.09 | 6140     | 63-91-2 C00079      |
| phenylalanyl-glycine                                   | Peptide                | Dipeptide                                                    | -0.74 | 1.30 | 0.01  | -1.19 | 1.21  | 0.99   | 1.00 | -0.18 | -1.36 | 1.01  | 0.77   | 0.92 | -0.14 | -0.87 | 0.59  | 0.71   | 0.90 | -0.28 | -1.00 | 0.43  | 0.43   | 0.80 | LC/MS Pos Early | 2898   | 223.11 | 98207    | 721-90-4            |
| phenylactate (PLA)                                     | Amino Acid             | Phenylalanine Metabolism                                     | 0.02  | 0.53 | 0.99  | -2.23 | 4.21  | 0.55   | 0.80 | 0.65  | -2.52 | 3.82  | 0.69   | 0.89 | 2.02  | 0.06  | 3.97  | 0.04   | 0.29 | 1.75  | -0.15 | 3.66  | 0.07   | 0.44 | LC/MS Neg       | 2208   | 165.06 | 3848     | 828-01-3 C05607     |
| phosphate                                              | Energy                 | Oxidative Phosphorylation                                    | 0.01  | 0.11 | 6.05  | -8.45 | 20.55 | 0.41   | 0.74 | 5.72  | -8.55 | 19.98 | 0.43   | 0.77 | 4.35  | -4.47 | 13.17 | 0.33   | 0.69 | 4.13  | -4.46 | 12.72 | 0.35   | 0.75 | LC/MS Neg       | 608    | 96.97  | 1061     | 7664-38-2 C00009    |
| phosphocholine                                         | Lipid                  | Phospholipid Metabolism                                      | -0.03 | 0.49 | -1.35 | -4.40 | 1.71  | 0.39   | 0.72 | -1.48 | -4.49 | 1.52  | 0.33   | 0.73 | -0.27 | -2.13 | 1.59  | 0.77   | 0.92 | -0.38 | -2.19 | 1.43  | 0.68   | 0.89 | LC/MS Pos Early | 700    | 184.07 | 1014     | 72556-74-2 C00588   |
| phytanate                                              | Xenobiotics            | Food Component/Plant                                         | 0.04  | 0.97 | 1.47  | -0.08 | 3.01  | 0.06   | 0.33 | 1.83  | 0.31  | 3.36  | 0.02   | 0.22 | 0.06  | -0.88 | 1.01  | 0.89   | 0.97 | 0.33  | -0.59 | 1.26  | 0.48   | 0.83 | LC/MS Neg       | 5908   | 311.30 | 26840    | 14721-66-5 C01607   |
| picolinate                                             | Amino Acid             | Tryptophan Metabolism                                        | -0.29 | 1.12 | 0.23  | -1.18 | 1.65  | 0.75   | 0.90 | 0.18  | -1.21 | 1.57  | 0.80   | 0.93 | -0.37 | -1.23 | 0.49  | 0.40   | 0.73 | -0.41 | -1.25 | 0.43  | 0.34   | 0.75 | LC/MS Pos Early | 910    | 124.04 | 1018     | 98-98-6 C10164      |
| picolinoylglycine                                      | Lipid                  | Fatty Acid Metabolism (Acyl Glycine)                         | -0.14 | 0.87 | 3.34  | 1.41  | 5.28  | 8.E-04 | 0.03 | 2.75  | 0.81  | 4.69  | 0.01   | 0.12 | 1.44  | 0.25  | 2.62  | 0.02   | 0.17 | 0.95  | -0.23 | 2.13  | 0.11   | 0.53 | LC/MS Neg       | 1829   | 179.05 | NA       |                     |
| pipicolate                                             | Amino Acid             | Lysine Metabolism                                            | 0.21  | 1.11 | -0.03 | -1.50 | 1.43  | 0.96   | 0.99 | -0.17 | -1.61 | 1.28  | 0.82   | 0.93 | 0.09  | -0.80 | 0.98  | 0.84   | 0.95 | -0.01 | -0.87 | 0.86  | 0.99   | 0.99 | LC/MS Pos Early | 2200   | 130.09 | 849      | 4043-87-2 C00408    |
| pregnen-20-ol-20-one disulfate*                        | Lipid                  | Pregnenolone Steroids                                        | 0.00  | 0.99 | 0.74  | -1.12 | 2.60  | 0.43   | 0.75 | 1.12  | -0.72 | 2.96  | 0.23   | 0.65 | 0.30  | -0.83 | 1.44  | 0.60   | 0.84 | 0.58  | -0.52 | 1.69  | 0.30   | 0.74 | LC/MS Neg       | 3868   | 238.08 | NA       |                     |
| pregnenediol sulfate (C21H34O5S)*                      | Lipid                  | Pregnenolone Steroids                                        | -0.07 | 0.92 | 0.80  | -1.15 | 2.75  | 0.42   | 0.75 | 1.49  | -0.45 | 3.43  | 0.13   | 0.53 | 0.30  | -0.89 | 1.48  | 0.63   | 0.85 | 0.80  | -0.37 | 1.97  | 0.18   | 0.62 | LC/MS Neg       | 5000   | 397.21 | NA       | 1247-64-9           |
| pregnenetriol disulfate*                               | Lipid                  | Pregnenolone Steroids                                        | -0.02 | 0.94 | 1.12  | -0.77 | 3.01  | 0.24   | 0.62 | 1.10  | -0.76 | 2.96  | 0.25   | 0.66 | 0.98  | -0.16 | 2.13  | 0.09   | 0.41 | 0.96  | -0.15 | 2.08  | 0.09   | 0.48 | LC/MS Neg       | 3515   | 246.07 | NA       |                     |
| pregnenetriol sulfate*                                 | Lipid                  | Pregnenolone Steroids                                        | -0.12 | 0.84 | 0.93  | -1.16 | 3.02  | 0.38   | 0.72 | 1.04  | -1.02 | 3.10  | 0.32   |      |       |       |       |        |      |       |       |       |        |      |                 |        |        |          |                     |

|                                         |                        |                                                      |       |      |       |       |       |        |        |       |       |       |        |      |       |       |      |        |        |       |       |      |        |        |                 |         |        |          |               |        |
|-----------------------------------------|------------------------|------------------------------------------------------|-------|------|-------|-------|-------|--------|--------|-------|-------|-------|--------|------|-------|-------|------|--------|--------|-------|-------|------|--------|--------|-----------------|---------|--------|----------|---------------|--------|
| succinylcarnitine (C4)                  | Energy                 | TCA Cycle                                            | -0.04 | 0.48 | 2.14  | -1.41 | 5.69  | 0.24   | 0.61   | 1.48  | -2.03 | 4.99  | 0.41   | 0.76 | 1.16  | -1.00 | 3.32 | 0.29   | 0.65   | 0.66  | -1.46 | 2.77 | 0.54   | 0.85   | LC/MS Pos Early | 2291    | 262.13 | 71464481 | 256928-74-2   |        |
| sucrose                                 | Carbohydrate           | Disaccharides and Oligosaccharides                   | -0.39 | 1.74 | 0.51  | -0.39 | 1.41  | 0.27   | 0.63   | 0.45  | -0.43 | 1.34  | 0.32   | 0.72 | 0.32  | -0.23 | 0.87 | 0.25   | 0.63   | 0.28  | -0.26 | 0.81 | 0.31   | 0.75   | LC/MS Polar     | 3092    | 387.11 | 5988     | 57-50-1       | C00089 |
| sulfate*                                | Xenobiotics            | Chemical                                             | -0.01 | 0.26 | 1.28  | -4.92 | 7.48  | 0.69   | 0.87   | 0.38  | -5.74 | 6.49  | 0.90   | 0.96 | -1.12 | -4.89 | 2.65 | 0.56   | 0.83   | -1.82 | -5.50 | 1.85 | 0.33   | 0.75   | LC/MS Neg       | 616     | 96.96  | 1118     | 14808-79-8    | C00059 |
| tartrate                                | Xenobiotics            | Food Component/Plant                                 | -0.56 | 1.82 | -0.13 | -0.98 | 0.71  | 0.76   | 0.90   | -0.22 | -1.05 | 0.61  | 0.60   | 0.84 | 0.11  | -0.41 | 0.62 | 0.69   | 0.89   | 0.04  | -0.46 | 0.54 | 0.88   | 0.95   | LC/MS Neg       | 615.3   | 149.01 | 444305   | 87-69-4;61010 | C00898 |
| tartronate (hydroxymalonate)            | Xenobiotics            | Food Component/Plant                                 | -0.09 | 0.76 | 0.45  | -1.65 | 2.56  | 0.67   | 0.87   | 0.75  | -1.33 | 2.82  | 0.48   | 0.78 | -0.21 | -0.80 | 0.76 | 0.42   | 0.74   | -0.30 | -1.55 | 0.95 | 0.63   | 0.88   | LC/MS Neg       | 610     | 119.00 | 45       | 80-69-3       | C02287 |
| taurine                                 | Amino Acid             | Methionine, Cysteine, SAM and Taurine Metabolism     | -0.11 | 0.60 | -0.89 | -3.64 | 1.87  | 0.53   | 0.79   | -0.36 | -3.09 | 2.36  | 0.79   | 0.93 | -1.35 | -3.03 | 0.32 | 0.11   | 0.46   | -0.96 | -2.60 | 0.67 | 0.25   | 0.70   | LC/MS Pos Early | 660     | 126.02 | 1123     | 107-35-7      | C00245 |
| taurochenodeoxycholate                  | Lipid                  | Primary Bile Acid Metabolism                         | -0.81 | 2.42 | -0.06 | -0.71 | 0.60  | 0.87   | 0.94   | 0.00  | -0.64 | 0.65  | 0.99   | 1.00 | -0.01 | -0.41 | 0.39 | 0.96   | 0.99   | 0.03  | -0.35 | 0.42 | 0.87   | 0.95   | LC/MS Neg       | 5250    | 498.29 | 387316   | 6009-98-9     | C05465 |
| taurochenodeoxycholic acid 3-sulfate    | Lipid                  | Secondary Bile Acid Metabolism                       | -0.44 | 1.64 | 0.33  | -0.62 | 1.28  | 0.49   | 0.78   | 0.35  | -0.58 | 1.29  | 0.46   | 0.77 | 0.10  | -0.48 | 0.67 | 0.74   | 0.91   | 0.11  | -0.46 | 0.67 | 0.71   | 0.90   | LC/MS Neg       | 4800    | 288.62 | NA       |               |        |
| taurochenolate sulfate*                 | Lipid                  | Secondary Bile Acid Metabolism                       | -0.02 | 0.98 | 0.53  | -1.00 | 2.06  | 0.50   | 0.78   | 0.47  | -1.04 | 1.97  | 0.54   | 0.81 | 0.66  | -0.27 | 1.59 | 0.17   | 0.54   | 0.60  | -0.30 | 1.51 | 0.19   | 0.64   | LC/MS Neg       | 4750    | 279.61 | NA       |               |        |
| taurothiocholate 3-sulfate              | Lipid                  | Secondary Bile Acid Metabolism                       | -1.02 | 2.23 | -0.43 | -1.11 | 0.25  | 0.21   | 0.58   | -0.41 | -1.08 | 0.25  | 0.22   | 0.64 | -0.21 | -0.63 | 0.20 | 0.31   | 0.67   | -0.20 | -0.60 | 0.20 | 0.33   | 0.75   | LC/MS Neg       | 5027    | 280.62 | 440071   | 64936-83-0    | C03642 |
| tetradecadienedioate (C14:2-DC)*        | Lipid                  | Fatty Acid, Dicarboxylate                            | -0.01 | 1.09 | 0.23  | -1.19 | 1.65  | 0.75   | 0.90   | 0.57  | -0.84 | 1.98  | 0.43   | 0.77 | 0.40  | -0.47 | 1.26 | 0.37   | 0.71   | 0.66  | -0.19 | 1.51 | 0.13   | 0.56   | LC/MS Neg       | 3172    | 253.14 | NA       |               |        |
| tetradecadienoate (C14:2)*              | Lipid                  | Fatty Acid, Dicarboxylate                            | -0.04 | 0.91 | 2.35  | 0.71  | 3.99  | 5.E-03 | 0.09   | 2.44  | 0.83  | 4.05  | 3.E-03 | 0.10 | 1.40  | 0.40  | 2.40 | 0.01   | 0.09   | 1.47  | 0.50  | 2.44 | 3.E-03 | 0.11   | LC/MS Neg       | 5315    | 223.17 | NA       |               |        |
| tetradecanedioate (C14)                 | Lipid                  | Fatty Acid, Dicarboxylate                            | 0.07  | 0.89 | 1.55  | -0.18 | 3.29  | 0.08   | 0.37   | 1.80  | 0.09  | 3.51  | 0.04   | 0.31 | 0.94  | -0.12 | 2.00 | 0.08   | 0.38   | 1.13  | 0.10  | 2.15 | 0.03   | 0.29   | LC/MS Neg       | 3985    | 257.18 | 13185    | 821-38-5      |        |
| tetrahydrocortisone glucuronide (5)     | Lipids                 | Corticosteroids                                      | -0.23 | 1.00 | 2.07  | 0.50  | 3.63  | 0.01   | 0.13   | 1.50  | -0.08 | 3.08  | 0.06   | 0.41 | 1.65  | 0.70  | 2.60 | 7.E-04 | 0.02   | 1.22  | 0.27  | 2.17 | 0.01   | 0.18   | LC/MS Neg       | 4697    | 539.25 | NA       |               |        |
| thioprolin                              | Xenobiotics            | Chemical                                             | -0.02 | 0.61 | 3.04  | 0.47  | 5.60  | 0.02   | 0.19   | 2.69  | 0.17  | 5.22  | 0.04   | 0.31 | 1.16  | -0.41 | 2.72 | 0.15   | 0.51   | 0.89  | -0.64 | 2.42 | 0.25   | 0.70   | LC/MS Pos Early | 1250    | 134.03 | 93176    | 34592-47-4    |        |
| threonate                               | Cofactors and Vitamins | Ascorbate and Aldarate Metabolism                    | -0.01 | 0.56 | -3.28 | -6.03 | -0.54 | 0.02   | 0.19   | -2.94 | -5.65 | -0.23 | 0.03   | 0.29 | -1.62 | -3.29 | 0.06 | 0.06   | 0.34   | -1.36 | -3.00 | 2.28 | 0.10   | 0.52   | LC/MS Polar     | 2384    | 135.03 | 151152   | 70753-61-6    | C01620 |
| threonine                               | Amino Acid             | Glycine, Serine and Threonine Metabolism             | 0.00  | 0.33 | 1.99  | -2.51 | 6.50  | 0.39   | 0.72   | 1.61  | -2.83 | 6.05  | 0.48   | 0.78 | 1.05  | -1.69 | 3.80 | 0.45   | 0.76   | 0.73  | -1.94 | 3.41 | 0.59   | 0.88   | LC/MS Pos Early | 1514    | 120.07 | 6288     | 72-19-5       | C00188 |
| threonylphenylalanine                   | Peptide                | Dipeptide                                            | -0.38 | 1.48 | 0.00  | -1.10 | 1.10  | 1.00   | 1.00   | 0.05  | -1.03 | 1.13  | 0.93   | 0.97 | -0.43 | -1.09 | 0.24 | 0.21   | 0.59   | -0.38 | -1.03 | 2.26 | 0.24   | 0.70   | LC/MS Pos Early | 3077    | 267.13 | 4099799  | 16875-27-7    |        |
| throxine                                | Amino Acid             | Tyrosine Metabolism                                  | -0.13 | 0.89 | 0.61  | -1.07 | 2.29  | 0.48   | 0.78   | 0.72  | -0.93 | 2.38  | 0.39   | 0.76 | 1.07  | 0.05  | 2.09 | 0.04   | 0.27   | 1.15  | 0.16  | 2.14 | 0.02   | 0.26   | LC/MS Neg       | 4808    | 775.68 | 5819     | 51-48-9       | C01829 |
| tiglyl carnitine (C5)                   | Amino Acid             | Leucine, Isoleucine and Valine Metabolism            | -0.10 | 0.90 | 1.68  | -0.04 | 3.41  | 0.06   | 0.33   | 1.50  | -0.20 | 3.21  | 0.08   | 0.44 | 0.19  | -0.86 | 1.25 | 0.72   | 0.91   | 0.05  | -0.98 | 1.08 | 0.92   | 0.96   | LC/MS Pos Early | 2962    | 244.15 | 22833596 | 64191-86-2    |        |
| trans-urocanate                         | Amino Acid             | Histidine Metabolism                                 | -0.01 | 0.45 | -2.88 | -6.20 | 0.45  | 0.09   | 0.39   | -2.80 | -6.07 | 0.47  | 0.09   | 0.46 | -1.19 | -3.22 | 0.84 | 0.25   | 0.63   | -1.14 | -3.11 | 0.83 | 0.26   | 0.70   | LC/MS Neg       | 777.7   | 137.04 | 736715   | 104-98-3      | C00785 |
| tricosanoyl sphingomyelin (d18:1/23:0)* | Lipid                  | Sphingomyelins                                       | -0.05 | 0.51 | 7.56  | 4.52  | 10.61 | 2.E-06 | 2.E-03 | 6.53  | 3.43  | 9.62  | 4.E-05 | 0.02 | 4.95  | 3.11  | 6.79 | 0.00   | 8.E-05 | 4.12  | 2.26  | 5.98 | 2.E-05 | 4.E-03 | LC/MS Pos Late  | 3200    | 801.68 | NA       |               |        |
| tridecenedioate (C13:1-DC)*             | Lipid                  | Fatty Acid, Dicarboxylate                            | -0.14 | 1.29 | 0.56  | -0.69 | 1.80  | 0.38   | 0.72   | 0.71  | -0.52 | 1.94  | 0.26   | 0.68 | 0.51  | -0.25 | 1.27 | 0.19   | 0.57   | 0.62  | -0.12 | 1.36 | 0.10   | 0.51   | LC/MS Neg       | 3121    | 241.14 | NA       |               |        |
| trigonelline (N'-methylnicotinate)      | Cofactors and Vitamins | Nicotinate and Nicotinamide Metabolism               | 0.02  | 1.25 | 0.19  | -1.09 | 1.47  | 0.77   | 0.91   | 0.12  | -1.14 | 1.38  | 0.85   | 0.95 | 0.05  | -0.73 | 0.83 | 0.90   | 0.97   | 0.01  | -0.75 | 0.76 | 0.99   | 0.99   | LC/MS Pos Early | 1388    | 138.05 | 5570     | 535-83-1      | C01004 |
| trimethylamine N-oxide                  | Lipid                  | Phospholipid Metabolism                              | -0.03 | 0.94 | -0.36 | -2.03 | 1.31  | 0.67   | 0.87   | -0.57 | -2.21 | 1.08  | 0.50   | 0.79 | -0.52 | -1.54 | 0.49 | 0.31   | 0.67   | -0.68 | -1.67 | 0.31 | 0.18   | 0.62   | LC/MS Pos Early | 2100    | 76.08  | 1145     | 1184-78-7     | C01104 |
| tryptophan                              | Amino Acid             | Tryptophan Metabolism                                | 0.00  | 0.28 | 1.55  | -3.89 | 6.98  | 0.58   | 0.81   | -0.64 | -4.73 | 6.01  | 0.81   | 0.93 | 1.02  | -2.29 | 4.33 | 0.55   | 0.83   | 0.31  | -2.93 | 3.54 | 0.85   | 0.94   | LC/MS Pos Early | 2986    | 205.10 | 6305     | 73-22-3       | C00078 |
| tryptophan betaine                      | Amino Acid             | Tryptophan Metabolism                                | -0.09 | 1.41 | 0.84  | -0.26 | 1.94  | 0.13   | 0.48   | 0.61  | -0.48 | 1.70  | 0.27   | 0.68 | 0.30  | -0.37 | 0.97 | 0.37   | 0.72   | 0.13  | -0.53 | 0.79 | 0.70   | 0.89   | LC/MS Pos Early | 2673    | 247.14 | 442106   | 20671-76-5    | C09213 |
| tyramine O-sulfate                      | Amino Acid             | Tyrosine Metabolism                                  | 0.20  | 1.53 | -0.03 | -1.04 | 0.98  | 0.95   | 0.98   | -0.10 | -1.09 | 0.89  | 0.84   | 0.95 | 0.15  | -0.46 | 0.77 | 0.63   | 0.85   | 0.10  | -0.50 | 0.70 | 0.74   | 0.91   | LC/MS Neg       | 1565    | 216.03 | 153005   | 30223-92-8    |        |
| tyr-asn                                 | Peptide                | Dipeptide                                            | -0.40 | 1.56 | 0.12  | -0.96 | 1.20  | 0.83   | 0.94   | 0.08  | -0.98 | 1.14  | 0.88   | 0.96 | -0.39 | -1.05 | 0.26 | 0.24   | 0.62   | -0.42 | -1.06 | 0.22 | 0.20   | 0.64   | LC/MS Neg       | 1544    | 294.11 | NA       |               |        |
| tyrosine                                | Amino Acid             | Tyrosine Metabolism                                  | 0.00  | 0.29 | 4.31  | -0.89 | 9.51  | 0.10   | 0.42   | 2.10  | -3.17 | 7.36  | 0.43   | 0.77 | 2.76  | -0.40 | 5.92 | 0.09   | 0.40   | 1.02  | -2.15 | 4.19 | 0.53   | 0.85   | LC/MS Pos Early | 2430    | 182.08 | 6057     | 60-18-4       | C00082 |
| undecanedioate (C11-DC)                 | Lipid                  | Fatty Acid, Dicarboxylate                            | 0.07  | 0.66 | -0.05 | -2.51 | 2.42  | 0.97   | 0.99   | -0.16 | -2.59 | 2.26  | 0.90   | 0.96 | 0.58  | -0.92 | 2.08 | 0.45   | 0.76   | 0.49  | -2.07 | 1.95 | 0.51   | 0.85   | LC/MS Neg       | 2440    | 215.13 | 15816    | 1852-04-6     |        |
| undecanoate (11:0)                      | Lipid                  | Medium Chain Fatty Acid                              | 0.04  | 0.21 | 2.10  | -4.92 | 9.12  | 0.56   | 0.80   | 2.03  | -4.87 | 8.93  | 0.56   | 0.82 | -1.38 | -5.66 | 2.89 | 0.53   | 0.81   | -1.44 | -5.60 | 2.72 | 0.50   | 0.84   | LC/MS Neg       | 5219.2  | 185.15 | 8180     | 334-48-5      | C17715 |
| uracil                                  | Nucleotide             | Pyrimidine Metabolism, Uracil containing             | -0.08 | 0.59 | -1.88 | -4.44 | 0.69  | 0.15   | 0.50   | -1.55 | -4.08 | 0.98  | 0.23   | 0.64 | -0.93 | -2.49 | 0.64 | 0.24   | 0.62   | -0.67 | -2.19 | 0.86 | 0.39   | 0.78   | LC/MS Polar     | 10899.7 | 111.02 | 1174     | 66-22-8       | C00106 |
| urate                                   | Nucleotide             | Purine Metabolism, (Hypo)Xanthine/Inosine containing | -0.03 | 0.29 | 5.70  | 0.33  | 11.08 | 0.04   | 0.27   | 4.06  | -1.31 | 9.43  | 0.14   | 0.54 | 3.28  | 0.01  | 6.55 | 0.05   | 0.31   | 2.00  | -1.24 | 5.24 | 0.23   | 0.69   | LC/MS Neg       | 757.1   | 167.02 | 1175     | 69-93-2;12010 | C00366 |
| urea                                    | Amino Acid             | Urea cycle; Arginine and Proline Metabolism          | -0.01 | 0.51 | -0.32 | -3.40 | 2.76  | 0.84   | 0.94   | -0.37 | -3.40 | 2.66  | 0.81   | 0.93 | -1.24 | -3.11 | 0.63 | 0.19   | 0.57   | -1.28 | -3.10 | 0.53 | 0.17   | 0.60   | LC/MS Pos Early | 700     | 121.07 | 1176     | 57-13-6       | C00086 |
| uridine                                 | Nucleotide             | Pyrimidine Metabolism, Uracil containing             | 0.01  | 0.32 | 0.20  | -4.71 | 5.11  | 0.93   | 0.98   | -0.67 | -5.52 | 4.18  | 0.79   | 0.92 | -0.68 | -3.67 | 2.31 | 0.66   | 0.87   | -1.36 | -4.28 | 1.56 | 0.36   | 0.75   | LC/MS Neg       | 1457.6  | 243.06 | 6029     | 58-96-8       | C00299 |
| (5)                                     | Lipid                  | Corticosteroids                                      | -0.14 | 0.91 | 1.74  | 0.01  | 3.48  | 0.05   | 0.30   | 1.33  | -0.39 | 3.05  | 0.13   | 0.53 | 1.58  | 0.53  | 2.63 | 3.E-03 | 0.07   | 1.27  | 0.23  | 2.30 | 0.02   | 0.21   | LC/MS Neg       | 4678    | 541.26 | NA       |               |        |
| ursodeoxycholate                        | Lipid                  | Secondary Bile Acid Metabolism                       | -0.11 | 1.56 | -0.21 | -1.18 | 0.76  | 0.68   | 0.87   | -0.12 | -1.08 | 0.84  | 0.81   | 0.93 | -0.24 | -0.82 | 0.35 | 0.43   | 0.75   | -0.17 | -0.74 | 0.41 | 0.57   | 0.86   | LC/MS Neg       | 5055    | 391.29 | 31401    | 128-13-2      | C07880 |
| valine                                  | Amino Acid             | Leucine, Isoleucine and Valine Metabolism            | 0.00  | 0.26 | 3.48  | -2.54 | 9.50  | 0.26   | 0.63   | 0.15  | -6.04 | 6.34  | 0.96   | 0.98 | 3.81  | 0.16  | 7.45 | 0.04   | 0.28   | 1.36  | -2.36 | 5.08 | 0.47   | 0.83   | LC/MS Pos Early | 2479    | 118.09 | 6287     | 72-18-4       | C00183 |
| valylleucine                            | Peptide                | Dipeptide                                            | -0.06 | 1.70 | -0.43 | -1.33 | 0.48  | 0.35   | 0.70   | -0.43 | -1.32 | 0.45  | 0.34   | 0.73 | 0.13  | -0.42 | 0.68 | 0.64   | 0.86   | 0.12  | -0.41 | 0.66 | 0.65   | 0.88   | LC/MS Pos Early | 3138    | 231.17 | 352039   | 22906-55-4    |        |
| vanillactate                            | Amino Acid             | Tyrosine Metabolism                                  | -0.14 | 0.87 | 0.72  | -1.29 | 2.73  | 0.48   | 0.78   | 0.94  | -1.03 | 2.92  | 0.35   | 0.73 | -0.39 | -1.62 | 0.83 | 0.53   | 0.81   | -0.22 | -1.42 | 0.97 | 0.71   | 0.90   | LC/MS Neg       | 1625    | 211.06 | 160637   | 2475-56-1     |        |
| vanillic acid glycine                   | Xenobiotics            | Food Component/Plant                                 | -0.27 | 1.36 | -0.04 | -1.17 | 1.09  | 0.95   | 0.98   | -0.03 | -1.14 | 1.08  | 0.96   | 0.98 | 0.16  | -0.53 | 0.85 | 0.65   | 0.86   | 0.16  | -0.50 | 0.83 | 0.63   | 0.88   | LC/MS Neg       | 1674    | 224.06 | NA       |               |        |
| vanillylmandelate (VMA)                 | Amino Acid             | Tyrosine Metabolism                                  | -0.05 | 0.64 | 2.42  | -1.10 | 4.99  | 0.06   | 0.33   | 2     |       |       |        |      |       |       |      |        |        |       |       |      |        |        |                 |         |        |          |               |        |

|           |       |      |       |       |       |        |        |       |       |       |        |      |       |       |       |        |      |       |       |       |        |      |                 |        |        |    |
|-----------|-------|------|-------|-------|-------|--------|--------|-------|-------|-------|--------|------|-------|-------|-------|--------|------|-------|-------|-------|--------|------|-----------------|--------|--------|----|
| X - 16935 | -0.03 | 0.81 | 1.10  | -0.78 | 2.97  | 0.25   | 0.63   | 1.15  | -0.69 | 2.99  | 0.22   | 0.64 | 1.08  | -0.06 | 2.21  | 0.06   | 0.35 | 1.11  | 0.01  | 2.22  | 0.05   | 0.35 | LC/MS Neg       | 4471   | 447.28 | NA |
| X - 16938 | -0.17 | 0.81 | 0.74  | -1.12 | 2.61  | 0.43   | 0.75   | 0.81  | -1.03 | 2.64  | 0.39   | 0.76 | 1.14  | -0.99 | 1.28  | 0.80   | 0.94 | 0.19  | -0.91 | 1.30  | 0.73   | 0.90 | LC/MS Neg       | 2000   | 233.10 | NA |
| X - 16964 | -0.20 | 0.95 | 1.42  | -0.23 | 3.07  | 0.09   | 0.40   | 1.21  | -0.42 | 2.84  | 0.15   | 0.55 | 1.08  | 0.08  | 2.09  | 0.03   | 0.26 | 0.92  | -0.06 | 1.90  | 0.07   | 0.41 | LC/MS Neg       | 3034   | 174.06 | NA |
| X - 17010 | 0.12  | 1.01 | -0.74 | -2.29 | 0.80  | 0.35   | 0.70   | -0.80 | -2.33 | 0.72  | 0.30   | 0.70 | -0.30 | -1.24 | 0.64  | 0.53   | 0.81 | -0.35 | -1.26 | 0.57  | 0.46   | 0.82 | LC/MS Neg       | 3178   | 189.11 | NA |
| X - 17357 | -0.22 | 0.91 | 1.04  | -0.64 | 2.72  | 0.22   | 0.59   | 0.88  | -0.77 | 2.53  | 0.30   | 0.70 | 0.94  | -0.07 | 1.96  | 0.07   | 0.36 | 0.83  | -0.16 | 1.82  | 0.10   | 0.52 | LC/MS Neg       | 4098   | 541.27 | NA |
| X - 17438 | -0.51 | 1.51 | -0.63 | -1.65 | 0.38  | 0.22   | 0.59   | -0.50 | -1.50 | 0.51  | 0.33   | 0.73 | -0.35 | -0.96 | 0.27  | 0.27   | 0.63 | -0.24 | -0.84 | 0.36  | 0.44   | 0.81 | LC/MS Neg       | 1950   | 245.14 | NA |
| X - 17685 | -1.03 | 2.71 | -0.19 | -0.77 | 0.40  | 0.53   | 0.79   | -0.23 | -0.81 | 0.34  | 0.42   | 0.76 | -0.10 | -0.46 | 0.25  | 0.57   | 0.84 | -0.14 | -0.49 | 0.20  | 0.42   | 0.80 | LC/MS Neg       | 2575   | 233.01 | NA |
| X - 18886 | -0.24 | 1.17 | 0.11  | -1.29 | 1.50  | 0.88   | 0.95   | -0.17 | -1.54 | 1.21  | 0.81   | 0.93 | 0.64  | -0.21 | 1.48  | 0.14   | 0.49 | 0.43  | -0.40 | 1.26  | 0.30   | 0.74 | LC/MS Neg       | 1870   | 217.11 | NA |
| X - 18899 | -0.04 | 0.82 | 0.34  | -1.55 | 2.22  | 0.73   | 0.89   | 0.19  | -1.66 | 2.05  | 0.84   | 0.94 | 0.31  | -0.84 | 1.45  | 0.60   | 0.84 | 0.20  | -0.91 | 1.32  | 0.72   | 0.90 | LC/MS Neg       | 3730   | 337.14 | NA |
| X - 18901 | -0.02 | 1.15 | 0.49  | -0.91 | 1.89  | 0.49   | 0.78   | 0.95  | -0.45 | 2.34  | 0.18   | 0.60 | -0.07 | -0.92 | 0.78  | 0.87   | 0.97 | 0.26  | -0.58 | 1.10  | 0.55   | 0.85 | LC/MS Neg       | 3800   | 211.02 | NA |
| X - 18913 | 0.15  | 0.94 | 0.97  | -0.66 | 2.61  | 0.24   | 0.61   | 0.71  | -0.90 | 2.33  | 0.38   | 0.75 | 1.01  | 0.02  | 2.00  | 0.05   | 0.30 | 0.81  | -0.16 | 1.78  | 0.10   | 0.52 | LC/MS Neg       | 4538   | 185.12 | NA |
| X - 18921 | -0.14 | 1.12 | 0.09  | -1.28 | 1.47  | 0.90   | 0.96   | 0.01  | -1.35 | 1.36  | 0.99   | 1.00 | 0.49  | -0.34 | 1.33  | 0.25   | 0.63 | 0.43  | -0.39 | 1.24  | 0.30   | 0.74 | LC/MS Neg       | 4870   | 193.12 | NA |
| X - 18922 | -0.17 | 0.91 | -0.96 | -2.63 | 0.71  | 0.26   | 0.63   | -1.32 | -2.97 | 0.33  | 0.12   | 0.50 | -0.19 | -1.20 | 0.83  | 0.72   | 0.91 | -0.45 | -1.45 | 0.54  | 0.37   | 0.76 | LC/MS Neg       | 4928   | 299.19 | NA |
| X - 19141 | -0.04 | 1.01 | 2.98  | 1.48  | 4.48  | 1.E-04 | 0.01   | 2.80  | 1.32  | 4.29  | 2.E-04 | 0.04 | 1.77  | 0.86  | 2.69  | 2.E-04 | 0.01 | 1.63  | 0.74  | 2.53  | 4.E-04 | 0.03 | LC/MS Neg       | 3705   | 415.20 | NA |
| X - 21258 | -0.06 | 1.41 | 0.84  | -0.27 | 1.94  | 0.14   | 0.49   | 0.75  | -0.34 | 1.84  | 0.18   | 0.59 | -0.03 | -0.70 | 0.65  | 0.93   | 0.98 | -0.09 | -0.75 | 0.56  | 0.78   | 0.93 | LC/MS Neg       | 3915   | 213.02 | NA |
| X - 21285 | -0.37 | 1.28 | 0.56  | -0.74 | 1.85  | 0.40   | 0.73   | 0.72  | -0.55 | 2.00  | 0.27   | 0.68 | 0.00  | -0.79 | 0.79  | 1.00   | 1.00 | 0.12  | -0.65 | 0.89  | 0.76   | 0.92 | LC/MS Neg       | 4500   | 365.14 | NA |
| X - 21286 | -0.05 | 0.97 | -1.73 | -3.33 | -0.13 | 0.03   | 0.26   | -1.59 | -3.17 | -0.01 | 0.05   | 0.35 | -0.86 | -1.72 | 0.12  | 0.08   | 0.40 | -0.75 | -1.71 | 0.20  | 0.12   | 0.55 | LC/MS Neg       | 1550   | 164.04 | NA |
| X - 21310 | -0.11 | 0.96 | -2.05 | -3.63 | -0.46 | 0.01   | 0.14   | -1.29 | -3.75 | -0.63 | 0.01   | 0.12 | -0.76 | -1.73 | 0.21  | 0.13   | 0.48 | -0.87 | -1.81 | 0.08  | 0.07   | 0.44 | LC/MS Neg       | 2235   | 233.98 | NA |
| X - 21319 | -0.02 | 1.22 | -0.11 | -1.38 | 1.16  | 0.86   | 0.94   | -0.28 | -1.54 | 0.97  | 0.65   | 0.87 | -0.01 | -0.78 | 0.76  | 0.98   | 0.99 | -0.15 | -0.90 | 0.61  | 0.70   | 0.89 | LC/MS Neg       | 4238.4 | 165.09 | NA |
| X - 21339 | -0.14 | 0.99 | 0.10  | -1.45 | 1.64  | 0.90   | 0.96   | -0.01 | -1.53 | 1.51  | 0.99   | 1.00 | 0.42  | -0.53 | 1.36  | 0.39   | 0.72 | 0.33  | -0.59 | 1.25  | 0.48   | 0.83 | LC/MS Neg       | 5105   | 453.32 | NA |
| X - 21342 | -0.06 | 0.42 | 3.08  | -0.59 | 6.76  | 0.10   | 0.42   | 2.52  | -1.11 | 6.15  | 0.17   | 0.59 | 2.43  | 0.20  | 4.65  | 0.03   | 0.24 | 2.00  | -0.18 | 4.18  | 0.07   | 0.44 | LC/MS Neg       | 5149   | 385.17 | NA |
| X - 21353 | -0.05 | 0.78 | 2.95  | 1.03  | 4.88  | 3.E-03 | 0.07   | 2.90  | 1.01  | 4.79  | 3.E-03 | 0.09 | 1.86  | 0.69  | 3.03  | 2.E-03 | 0.05 | 1.82  | 0.68  | 2.96  | 2.E-03 | 0.08 | LC/MS Neg       | 5196   | 239.17 | NA |
| X - 21364 | -0.04 | 0.74 | 1.75  | -0.49 | 4.00  | 0.13   | 0.46   | 1.47  | -0.74 | 3.68  | 0.19   | 0.61 | 0.92  | -0.44 | 2.29  | 0.18   | 0.56 | 0.70  | -0.64 | 2.03  | 0.30   | 0.74 | LC/MS Neg       | 3757   | 213.09 | NA |
| X - 21410 | -0.84 | 1.99 | 0.32  | -0.45 | 1.10  | 0.41   | 0.74   | 0.19  | -0.58 | 0.95  | 0.64   | 0.86 | -0.01 | -0.48 | 0.46  | 0.97   | 0.99 | -0.12 | -0.58 | 0.35  | 0.62   | 0.88 | LC/MS Neg       | 3921   | 385.17 | NA |
| X - 21441 | -0.04 | 0.90 | 1.92  | 0.21  | 3.64  | 0.03   | 0.23   | 2.04  | 0.35  | 3.73  | 0.02   | 0.22 | 1.51  | 0.47  | 2.55  | 4.E-03 | 0.08 | 1.59  | 0.58  | 2.60  | 2.E-03 | 0.08 | LC/MS Neg       | 3025.4 | 294.11 | NA |
| X - 21467 | 0.00  | 0.63 | -1.34 | -3.77 | 1.09  | 0.28   | 0.65   | -2.41 | -4.84 | 0.02  | 0.05   | 0.37 | -0.45 | -1.93 | 1.03  | 0.55   | 0.83 | -1.24 | -2.71 | 0.23  | 0.10   | 0.50 | LC/MS Neg       | 4041   | 262.62 | NA |
| X - 21470 | 0.00  | 1.07 | 0.52  | -1.02 | 2.05  | 0.51   | 0.78   | 0.60  | -0.90 | 2.11  | 0.43   | 0.77 | 0.02  | -0.91 | 0.95  | 0.96   | 0.99 | 0.09  | -0.82 | 0.99  | 0.85   | 0.94 | LC/MS Neg       | 3249   | 232.06 | NA |
| X - 21471 | -0.33 | 1.22 | -0.19 | -1.65 | 1.28  | 0.80   | 0.92   | -0.59 | -2.05 | 0.86  | 0.42   | 0.76 | 0.05  | -0.84 | 0.95  | 0.90   | 0.97 | -0.25 | -1.13 | 0.62  | 0.57   | 0.87 | LC/MS Neg       | 4039   | 295.11 | NA |
| X - 21607 | -0.05 | 0.79 | 1.26  | -0.68 | 3.21  | 0.20   | 0.58   | 1.51  | -0.41 | 3.42  | 0.12   | 0.52 | 1.39  | 0.21  | 2.56  | 0.02   | 0.18 | 1.58  | 0.43  | 2.72  | 0.01   | 0.14 | LC/MS Neg       | 4529   | 167.11 | NA |
| X - 21628 | -0.51 | 1.56 | 0.10  | -0.89 | 1.08  | 0.85   | 0.94   | 0.27  | -0.70 | 1.24  | 0.58   | 0.84 | -0.28 | -0.88 | 0.31  | 0.35   | 0.70 | -0.15 | -0.73 | 0.44  | 0.62   | 0.88 | LC/MS Neg       | 2270   | 697.26 | NA |
| X - 21733 | -0.15 | 1.31 | -1.44 | -2.62 | -0.26 | 0.02   | 0.18   | -1.24 | -2.41 | -0.07 | 0.04   | 0.31 | -0.96 | -1.68 | -0.24 | 0.01   | 0.11 | -0.81 | -1.52 | -0.11 | 0.02   | 0.26 | LC/MS Neg       | 2716   | 248.06 | NA |
| X - 21736 | 0.01  | 0.95 | -0.05 | -1.72 | 1.62  | 0.95   | 0.98   | -0.56 | -2.22 | 1.10  | 0.51   | 0.80 | 0.58  | -0.44 | 1.59  | 0.26   | 0.63 | 0.20  | -0.80 | 1.20  | 0.69   | 0.89 | LC/MS Neg       | 3345   | 183.14 | NA |
| X - 21785 | -0.04 | 0.47 | 2.92  | -0.56 | 6.40  | 0.10   | 0.42   | 1.98  | -1.49 | 5.44  | 0.26   | 0.68 | 0.31  | -1.82 | 2.43  | 0.78   | 0.92 | -0.45 | -2.54 | 1.64  | 0.67   | 0.89 | LC/MS Neg       | 765    | 189.04 | NA |
| X - 21796 | 0.03  | 0.57 | -1.16 | -3.87 | 1.55  | 0.40   | 0.73   | -1.21 | -3.87 | 1.46  | 0.37   | 0.74 | -0.57 | -2.22 | 1.08  | 0.50   | 0.81 | -0.60 | -2.21 | 1.00  | 0.46   | 0.83 | LC/MS Neg       | 1625   | 138.06 | NA |
| X - 21821 | -0.67 | 1.73 | 0.18  | -0.73 | 1.08  | 0.70   | 0.88   | 0.26  | -0.63 | 1.15  | 0.57   | 0.83 | 0.06  | -0.49 | 0.61  | 0.83   | 0.95 | 0.12  | -0.41 | 0.66  | 0.66   | 0.88 | LC/MS Neg       | 2930   | 243.08 | NA |
| X - 21829 | -0.30 | 1.18 | 1.00  | -0.33 | 2.32  | 0.14   | 0.49   | 0.56  | -0.77 | 1.89  | 0.41   | 0.76 | 0.92  | -0.11 | 1.73  | 0.03   | 0.21 | 0.59  | -0.21 | 1.39  | 0.15   | 0.58 | LC/MS Neg       | 3440   | 245.14 | NA |
| X - 21834 | -0.40 | 1.62 | 1.01  | 0.03  | 1.99  | 0.04   | 0.28   | 1.03  | 0.07  | 1.99  | 0.04   | 0.30 | -0.25 | -0.85 | 0.34  | 0.40   | 0.74 | -0.24 | -0.82 | 0.34  | 0.41   | 0.79 | LC/MS Neg       | 3720   | 229.02 | NA |
| X - 22162 | 0.03  | 0.48 | -0.15 | -3.63 | 3.33  | 0.93   | 0.98   | 0.31  | -3.13 | 3.74  | 0.86   | 0.96 | -1.98 | -4.09 | 0.13  | 0.07   | 0.35 | -1.64 | -3.70 | 0.43  | 0.12   | 0.55 | LC/MS Pos Early | 960    | 150.06 | NA |
| X - 22771 | -0.08 | 0.81 | 0.41  | -1.62 | 2.45  | 0.69   | 0.87   | -0.14 | -2.16 | 1.88  | 0.89   | 0.96 | 0.81  | -0.43 | 2.04  | 0.20   | 0.58 | 0.40  | -0.81 | 1.62  | 0.52   | 0.85 | LC/MS Neg       | 2180   | 160.04 | NA |
| X - 22776 | -0.08 | 1.41 | -0.64 | -1.76 | 0.48  | 0.26   | 0.63   | -0.79 | -1.90 | 0.31  | 0.16   | 0.58 | -0.38 | -1.06 | 0.30  | 0.27   | 0.63 | -0.49 | -1.16 | 0.17  | 0.15   | 0.58 | LC/MS Neg       | 3615   | 252.04 | NA |
| X - 22802 | -0.02 | 0.76 | -2.57 | -4.53 | -0.60 | 0.01   | 0.14   | -2.27 | -4.21 | -0.33 | 0.02   | 0.24 | -1.13 | -2.33 | 0.07  | 0.06   | 0.35 | -0.90 | -2.08 | 0.27  | 0.13   | 0.56 | LC/MS Neg       | 5290   | 395.24 | NA |
| X - 23276 | -0.08 | 0.85 | 0.57  | -1.28 | 2.41  | 0.54   | 0.80   | 0.56  | -1.26 | 2.37  | 0.55   | 0.81 | 0.08  | -1.10 | 1.20  | 0.89   | 0.97 | 0.07  | -1.02 | 1.16  | 0.90   | 0.96 | LC/MS Neg       | 4957.5 | 329.23 | NA |
| X - 23587 | -0.28 | 1.42 | -0.12 | -1.24 | 1.00  | 0.83   | 0.94   | -0.23 | -1.34 | 0.87  | 0.68   | 0.88 | -0.52 | -1.20 | 0.16  | 0.13   | 0.49 | -0.61 | -1.27 | 0.05  | 0.07   | 0.44 | LC/MS Pos Early | 1230   | 132.10 | NA |
| X - 23593 | -0.01 | 0.81 | 0.54  | -1.41 | 2.49  | 0.59   | 0.82   | 0.49  | -1.43 | 2.40  | 0.62   | 0.85 | 0.89  | -0.29 | 2.08  | 0.14   | 0.49 | 0.85  | -0.31 | 2.00  | 0.15   | 0.58 | LC/MS Pos Early | 1531   | 191.10 | NA |
| X - 23636 | -0.19 | 1.08 | 0.43  | -0.99 | 1.85  | 0.55   | 0.80   | 0.59  | -0.82 | 1.99  | 0.41   | 0.76 | 0.60  | -0.27 | 1.46  | 0.17   | 0.55 | 0.71  | -0.13 | 1.56  | 0.10   | 0.50 | LC/MS Pos Early | 1129   | 249.11 | NA |
| X - 23639 | 0.01  | 0.55 | 1.58  | -1.25 | 4.40  | 0.27   | 0.64   | 2.42  | -0.38 | 5.22  | 0.09   | 0.45 | 0.21  | -1.51 | 1.93  | 0.81   | 0.94 | 0.83  | -0.86 | 2.52  | 0.33   | 0.75 | LC/MS Pos Early | 1640   | 134.08 | NA |
| X - 23644 | -0.11 | 1.19 | 0.04  | -1.28 | 1.36  | 0.95   | 0.98   | -0.06 | -1.36 | 1.24  | 0.93   | 0.97 | 0.12  | -0.68 | 0.93  | 0.76   | 0.92 | 0.05  | -0.74 | 0.83  | 0.91   | 0.96 | LC/MS Pos Early | 983    | 146.08 | NA |
| X - 23659 | -0.19 | 0.94 | 0.28  | -1.47 | 2.03  | 0.75   | 0.90   | -0.28 | -2.02 | 1.46  | 0.75   | 0.91 | 0.09  | -0.97 | 1.16  | 0.87   | 0.96 | -0.34 | -1.39 | 0.71  | 0.53   | 0.85 | LC/MS Pos Early | 2449   | 143.12 | NA |
| X - 23739 | -0.08 | 0.71 | -0.11 | -2.25 | 2.03  | 0.92   | 0.97   | -0.26 | -2.36 | 1.85  | 0.81   | 0.93 | 0.73  | -0.56 | 2.03  | 0.27   | 0.63 | 0.62  | -0.64 | 1.89  | 0.33   | 0.75 | LC/MS Pos Early | 1286   | 262.10 | NA |
| X - 23780 | -0.03 | 1.19 | -0.30 | -1.59 | 1.00  | 0.65   | 0.86</ |       |       |       |        |      |       |       |       |        |      |       |       |       |        |      |                 |        |        |    |

Table S11. Association between individual metabolites [25-50% values below detection limits (BLD), reference=BLD] with systolic and diastolic blood pressure (SBP and DBP)

| Metabolites                                       | Super-pathway | Sub-pathway               | SBP          |              |              |              |         |         |         |        |         |         |         |        | DBP          |              |         |         |         |        |         |         |       |        |       |       | Platform | R1    | R2    | MASS  | PUBCHEM CAS | KEGG  |          |       |          |         |           |        |          |       |       |          |             |           |          |               |           |           |           |              |           |        |
|---------------------------------------------------|---------------|---------------------------|--------------|--------------|--------------|--------------|---------|---------|---------|--------|---------|---------|---------|--------|--------------|--------------|---------|---------|---------|--------|---------|---------|-------|--------|-------|-------|----------|-------|-------|-------|-------------|-------|----------|-------|----------|---------|-----------|--------|----------|-------|-------|----------|-------------|-----------|----------|---------------|-----------|-----------|-----------|--------------|-----------|--------|
|                                                   |               |                           | Overall      |              | Model 1      |              |         |         | Model 2 |        |         |         | Overall |        | Model 1      |              |         |         | Model 2 |        |         |         |       |        |       |       |          |       |       |       |             |       |          |       |          |         |           |        |          |       |       |          |             |           |          |               |           |           |           |              |           |        |
|                                                   |               |                           | Below median | Above median | Below median | Above median | p-value | q-value | Coef.   | 95% CI | p-value | q-value | Coef.   | 95% CI | Below median | Above median | p-value | q-value | Coef.   | 95% CI | p-value | q-value | Coef. | 95% CI |       |       |          |       |       |       |             |       |          |       |          |         |           |        |          |       |       |          |             |           |          |               |           |           |           |              |           |        |
| 12,13-DHAPOME                                     | Lipid         | Fatty Acid, Dihydroxy     | 24.65%       | 38.25%       | 37.10%       | 0.63         | 0.85    | 1.43    | -2.24   | 5.31   | 0.95    | -1.13   | -4.02   | 3.76   | 0.95         | 0.59         | 0.94    | 1.57    | -2.24   | 5.38   | 0.42    | -0.02   | -3.84 | 3.81   | 0.95  | 0.70  | 0.90     | -0.49 | -2.70 | 1.75  | 0.67        | -0.96 | -3.19    | 1.30  | 0.41     | -1.89   | 2.73      | 0.78   | LCMS Neg | 313   | 23843 | 10236635 | 263399-35-5 | C14829    |          |               |           |           |           |              |           |        |
| 1-methylxanthine                                  | Xenobiotics   | Xanthine Metabolism       | 32.49%       | 34.10%       | 33.41%       | 0.74         | 0.90    | -1.09   | -3.50   | 1.91   | 0.95    | -1.66   | -5.20   | 2.08   | 0.97         | 0.70         | 0.92    | 1.96    | -3.50   | 1.91   | 0.41    | -0.49   | -2.70 | 1.75   | 0.67  | -0.96 | -3.19    | 1.30  | 0.41  | -1.89 | 2.73        | 0.78  | LCMS Neg | 1569  | 165.014  | 80220   | 6136-37-4 | C16358 |          |       |       |          |             |           |          |               |           |           |           |              |           |        |
| 1-palmitoyl-GPG (16:0)                            | Lipid         | Lysophospholipid          | 32.49%       | 34.10%       | 33.41%       | 0.74         | 0.90    | -1.09   | -3.50   | 1.91   | 0.95    | -1.66   | -5.20   | 2.08   | 0.97         | 0.70         | 0.92    | 1.96    | -3.50   | 1.91   | 0.41    | -0.49   | -2.70 | 1.75   | 0.67  | -0.96 | -3.19    | 1.30  | 0.41  | -1.89 | 2.73        | 0.78  | LCMS Neg | 5590  | 483.2784 | 3300276 |           |        |          |       |       |          |             |           |          |               |           |           |           |              |           |        |
| 21-hydroxypregnenolone monosulfate (1)            | Lipid         | Pregnenolone Steroids     | 29.03%       | 35.02%       | 35.94%       | 0.93         | 0.98    | 1.70    | -4.49   | 3.09   | 0.72    | -0.29   | -4.12   | 3.54   | 0.88         | 0.89         | 0.96    | -0.85   | -4.58   | 2.88   | 0.66    | -0.49   | -3.96 | 3.58   | 0.88  | 0.64  | 0.86     | -1.11 | -3.41 | 1.20  | 0.34        | -0.57 | -2.90    | 1.76  | 0.63     | 0.55    | 0.86      | -1.22  | -3.46    | 1.03  | 0.29  | -0.49    | -2.76       | 1.77      | 0.63     | LCMS Neg      | 4624      | 411.8468  | 174681    | 88378-34-1   |           |        |
| 2-ethylphenylsulfate                              | Xenobiotics   | Benzoate Metabolism       | 38.02%       | 30.88%       | 31.14%       | 0.44         | 0.75    | 1.69    | -2.00   | 5.38   | 0.37    | -0.75   | -4.46   | 2.95   | 0.69         | 0.34         | 0.73    | 2.13    | -1.50   | 5.77   | 0.25    | -0.19   | -3.13 | 1.55   | 0.69  | 0.94  | 0.98     | -0.39 | -2.64 | 1.87  | 0.74        | -0.57 | -2.31    | 2.20  | 0.96     | 0.99    | 0.99      | -0.05  | -2.25    | 2.14  | 0.96  | 0.14     | -2.06       | 2.34      | 0.96     | LCMS Neg      | 3416      | 201.0227  | NA        |              |           |        |
| 2-methoxyhydroquinone sulfate (1)                 | Xenobiotics   | Benzoate Metabolism       | 25.58%       | 37.56%       | 36.87%       | 0.45         | 0.76    | 1.39    | -2.50   | 6.28   | 0.48    | -0.88   | -4.78   | 3.02   | 0.66         | 0.40         | 0.76    | 1.58    | -2.25   | 5.41   | 0.42    | -0.78   | -4.61 | 3.06   | 0.66  | 0.13  | 0.49     | 2.25  | -0.11 | 4.61  | 0.66        | 0.60  | -1.77    | 2.97  | 0.62     | 0.09    | 0.49      | 2.40   | 1.00     | 0.70  | 0.40  | -1.62    | 2.99        | 0.62      | LCMS Neg | 1526          | 218.99704 | NA        |           |              |           |        |
| 2-methoxyseroinol sulfate                         | Xenobiotics   | Chemical                  | 25.12%       | 38.71%       | 36.18%       | 0.19         | 0.55    | 1.24    | -2.64   | 6.12   | 0.53    | -1.99   | -5.90   | 1.92   | 0.32         | 0.13         | 0.52    | 1.43    | -2.38   | 5.24   | 0.46    | -1.21   | -5.95 | 1.72   | 0.32  | 0.76  | 0.92     | 0.59  | -1.78 | 2.96  | 0.62        | -0.17 | -2.56    | 2.21  | 0.89     | 0.62    | 0.88      | 0.73   | -1.57    | 3.04  | 0.53  | -0.27    | -2.59       | 2.06      | 0.89     | LCMS Neg      | 1863      | 218.99688 | NA        | 1446269-78-8 |           |        |
| 3-(4-hydroxyphenyl)propionate sulfate             | Xenobiotics   | Benzoate Metabolism       | 39.40%       | 29.95%       | 30.65%       | 0.30         | 0.66    | -1.75   | -6.35   | 0.85   | 0.13    | -1.77   | -5.35   | 1.81   | 0.33         | 0.29         | 0.70    | -2.78   | -6.32   | 0.76   | 0.12    | -1.65   | -5.17 | 1.87   | 0.33  | 0.33  | 0.69     | -1.40 | -3.59 | 0.79  | 0.21        | -1.40 | -3.58    | 0.78  | 0.21     | 0.33    | 0.74      | -1.42  | -3.55    | 0.71  | 0.19  | -1.31    | -3.43       | 0.82      | 0.21     | LCMS Neg      | 1294      | 245.01253 | 187488    | 86321-32-6   |           |        |
| 3-(4-hydroxyphenyl)propionate sulfate             | Xenobiotics   | Benzoate Metabolism       | 42.63%       | 26.96%       | 30.41%       | 0.31         | 0.66    | -1.87   | -5.56   | 1.82   | 0.32    | -1.72   | -6.32   | 0.89   | 0.14         | 0.16         | 0.59    | -1.76   | -6.39   | 1.87   | 0.34    | -3.44   | -7.00 | 1.12   | 0.14  | 0.82  | 0.94     | -1.11 | -2.36 | 1.15  | 0.92        | -0.68 | -2.88    | 1.52  | 0.54     | 0.47    | 0.83      | -0.03  | -2.22    | 1.17  | 0.98  | -1.23    | -3.37       | 0.92      | 0.54     | LCMS Neg      | 1670      | 165.05571 | 10394     |              | C01744    |        |
| 3-acetylphenol sulfate                            | Xenobiotics   | Chemical                  | 35.94%       | 32.72%       | 31.34%       | 0.97         | 0.99    | -0.20   | -3.79   | 3.39   | 0.91    | 0.30    | -3.41   | 4.01   | 0.87         | 0.93         | 0.97    | 0.34    | -3.87   | 3.19   | 0.85    | 0.37    | -3.28 | 4.01   | 0.87  | 0.66  | 0.87     | 1.00  | -1.18 | 3.19  | 0.37        | 0.35  | -1.90    | 2.61  | 0.76     | 0.71    | 0.89      | 0.90   | -1.22    | 3.03  | 0.40  | -0.40    | -1.79       | 2.60      | 0.76     | LCMS Neg      | 2477      | 215.00196 | NA        |              |           |        |
| 3-ethylcatechol sulfate (1)                       | Xenobiotics   | Food Component/Plant      | 47.47%       | 26.27%       | 26.27%       | 0.85         | 0.94    | -0.70   | -4.41   | 3.00   | 0.71    | 0.50    | -3.19   | 4.20   | 0.79         | 0.80         | 0.93    | -0.65   | -4.29   | 2.99   | 0.72    | 0.72    | -2.91 | 4.35   | 0.79  | 0.92  | 0.98     | 0.28  | -1.98 | 2.53  | 0.81        | 0.45  | -1.80    | 2.70  | 0.69     | 0.85    | 0.95      | 0.31   | -1.88    | 2.51  | 0.78  | 0.62     | -1.57       | 2.81      | 0.69     | LCMS Neg      | 3422      | 217.01761 | NA        |              |           |        |
| 3-hydroxydecanedioate*                            | Lipid         | Fatty Acid, Dicarboxylate | 35.71%       | 31.80%       | 32.49%       | 0.91         | 0.96    | 0.70    | -3.02   | 4.42   | 0.71    | -0.01   | -3.77   | 3.75   | 1.00         | 0.76         | 0.91    | 1.14    | -2.52   | 4.80   | 0.54    | -0.13   | -3.82 | 3.57   | 1.00  | 0.74  | 0.91     | 0.89  | -1.37 | 3.15  | 0.44        | 0.35  | -1.94    | 2.64  | 0.76     | 0.51    | 0.85      | 1.23   | -0.97    | 3.44  | 0.27  | -0.26    | -1.96       | 2.49      | 0.76     | LCMS Neg      | 2260      | 245.13969 | NA        |              |           |        |
| 3-methyladipate                                   | Lipid         | Fatty Acid, Dicarboxylate | 29.03%       | 37.10%       | 33.87%       | 0.74         | 0.90    | -1.46   | -5.27   | 2.34   | 0.45    | -0.53   | -4.40   | 3.34   | 0.79         | 0.88         | 0.96    | -0.97   | -4.72   | 2.78   | 0.61    | -0.58   | -4.39 | 3.22   | 0.79  | 0.34  | 0.69     | -1.71 | -4.02 | 1.00  | 0.15        | -0.84 | -3.20    | 1.51  | 0.48     | 0.51    | 0.84      | -1.34  | -3.59    | 0.92  | 0.25  | -0.89    | -3.18       | 1.40      | 0.48     | LCMS Polar    | 2825      | 159.06628 | 12292     | 422955       |           |        |
| 4-cholesten-3-one                                 | Lipid         | Sterol                    | 25.81%       | 37.79%       | 36.41%       | 0.61         | 0.83    | 1.94    | -2.00   | 6.98   | 0.33    | 0.90    | -5.10   | 4.98   | 0.69         | 0.41         | 0.78    | 2.13    | -1.74   | 6.41   | 0.41    | 1.35    | -2.65 | 3.35   | 0.66  | 0.33  | 0.69     | 1.76  | -0.64 | 4.15  | 0.15        | 1.46  | -1.01    | 3.93  | 0.25     | 0.23    | 0.69      | 1.91   | -0.42    | 4.23  | 0.11  | -1.30    | -0.60       | 4.21      | 0.25     | LCMS Pos Late | 2512      | 305.3465  | 91477     | 601-57-0     | C00569    |        |
| 4-methoxycummin                                   | Xenobiotics   | Drug - Cardiovascular     | 45.62%       | 26.59%       | 27.88%       | 0.41         | 0.74    | 1.08    | -4.71   | 2.94   | 0.56    | 1.67    | -1.95   | 5.29   | 0.37         | 0.40         | 0.76    | -1.40   | -4.97   | 2.17   | 0.44    | 1.39    | -2.17 | 4.95   | 0.37  | 0.71  | 0.90     | -0.83 | -3.04 | 1.39  | 0.46        | 0.12  | -2.09    | 2.32  | 0.92     | 0.60    | 0.88      | -1.07  | -3.22    | 1.08  | 0.33  | 0.30     | -1.00       | -2.24     | 2.05     | 0.92          | LCMS Neg  | 2470      | 161.02241 | 54682930     | 1076-38-6 | C20414 |
| 4-methoxyphenol sulfate                           | Xenobiotics   | Tyrosine Metabolism       | 28.57%       | 38.87%       | 34.56%       | 0.38         | 0.72    | 1.73    | -1.08   | 6.53   | 0.37    | 2.71    | -1.14   | 6.56   | 0.17         | 0.47         | 0.78    | 1.21    | -2.53   | 4.95   | 0.53    | 2.36    | -4.14 | 6.15   | 0.17  | 0.78  | 0.92     | 0.80  | -1.51 | 3.11  | 0.50        | 0.66  | -1.89    | 3.01  | 0.58     | 0.93    | 0.97      | 0.40   | -1.86    | 2.65  | 0.73  | 0.39     | -1.50       | 2.68      | 0.58     | LCMS Neg      | 2420      | 203.00196 | NA        | 3233-61-8    |           |        |
| 4-vinylguaiacol sulfate                           | Xenobiotics   | Food Component/Plant      | 31.80%       | 34.33%       | 33.87%       | 0.85         | 0.94    | -0.88   | -4.57   | 2.81   | 0.64    | -1.00   | -4.72   | 2.73   | 0.60         | 0.79         | 0.92    | -1.27   | -4.91   | 2.36   | 0.49    | -0.81   | -4.47 | 2.86   | 0.60  | 0.99  | 1.00     | 1.16  | -2.09 | 2.41  | 0.89        | 0.03  | -2.24    | 2.30  | 0.98     | 0.96    | 0.98      | -1.14  | -2.33    | 2.05  | 0.27  | -1.20    | -2.48       | 0.98      | LCMS Neg | 3354          | 229.01761 | NA        |           |              |           |        |
| 5-acetylamino-6-amino-3-methyluracil              | Xenobiotics   | Xanthine Metabolism       | 41.47%       | 29.26%       | 29.26%       | 0.54         | 0.80    | -2.03   | -5.67   | 1.60   | 0.27    | -1.10   | -4.82   | 2.53   | 0.54         | 0.70         | 0.89    | -1.43   | -5.02   | 1.16   | 0.43    | -1.11   | -4.72 | 2.51   | 0.54  | 0.32  | 0.68     | -1.66 | -3.87 | 0.55  | 0.14        | -0.45 | -2.68    | 1.78  | 0.69     | 0.55    | 0.86      | -1.20  | -3.36    | 0.96  | 0.20  | -0.42    | -2.60       | 1.75      | 0.69     | LCMS Polar    | 1710      | 197.06801 | 88299     | 1196513-01-1 | C16366    |        |
| 5alpa-androstan-3alpa,17alpa-diol monosulfate     | Lipid         | Androgenic Steroids       | 32.72%       | 34.10%       | 33.18%       | 0.99         | 1.00    | 0.07    | -3.60   | 3.74   | 0.97    | 0.26    | -3.44   | 3.97   | 0.89         | 0.96         | 0.98    | 0.98    | -0.51   | -4.14  | 3.11    | 0.78    | -1.00 | -3.75  | 3.54  | 0.89  | 0.86     | 0.96  | 0.47  | -1.77 | 2.70        | 0.68  | -0.11    | -2.37 | 2.14     | 0.92    | 0.92      | 0.97   | 0.03     | -2.16 | 2.21  | 0.98     | -0.39       | -2.59     | 1.81     | 0.92          | LCMS Neg  | 5208      | 371.18976 | NA           |           |        |
| 5alpa-androstan-3alpa,17beta-diol disulfate       | Lipid         | Androgenic Steroids       | 37.10%       | 31.34%       | 31.57%       | 0.50         | 0.78    | -2.18   | -6.82   | 1.46   | 0.24    | -0.88   | -4.51   | 2.75   | 0.64         | 0.45         | 0.77    | -2.20   | -5.97   | 3.18   | 0.64    | 0.75    | 0.91  | -0.72  | -2.94 | 1.50  | 0.52     | -0.77 | -2.96 | 1.47  | 0.51        | 0.80  | 0.93     | -0.74 | -2.90    | 1.42    | 0.50      | -0.38  | -2.54    | 1.78  | 0.51  | LCMS Neg | 4275        | 225.06965 | NA       |               |           |           |           |              |           |        |
| 5alpa-androstan-3alpa,17beta-diol monosulfate (2) | Lipid         | Androgenic Steroids       | 34.56%       | 32.95%       | 32.49%       | 0.68         | 0.87    | -1.62   | -5.24   | 2.01   | 0.38    | -0.62   | -4.26   | 3.03   | 0.74         | 0.61         | 0.84    | -1.55   | -5.11   | 2.01   | 0.39    | 0.68    | -0.58 | -3.52  | 3.68  | 0.74  | 0.64     | 0.86  | -1.05 | -3.26 | 1.15        | 0.35  | -0.63    | -2.85 | 1.59     | 0.58    | 0.61      | 0.88   | -1.00    | -3.15 | 1.14  | 0.36     | -1.00       | -2.27     | 2.07     | 0.58          | LCMS Neg  | 5080      | 371.18976 | NA           |           |        |
| 6-bromotyrophane                                  | Amino Acid    | Tryptophan Metabolism     | 32.26%       | 36.18%       | 31.57%       | 0.11         | 0.44    | -1.11   | -4.72   | 2.51   | 0.55    | -3.85   | -7.57   | -0.13  | 0.04         | 0.16         | 0.58    | -0.87   | -4.43   | 2.69   | 0.63    | -3.45   | -7.12 | 0.22   | 0.04  | 0.16  | 0.54     | -0.50 | -2.70 | 1.70  | 0.66        | -2.11 | -4.38    | 1.16  | 0.07     | 0.23    | 0.69      | -0.32  | -2.46    | 1.83  | 0.77  | -1.80    | -4.01       | 0.41      | 0.07     | LCMS Neg      | 3565      | 280.93311 | NA        |              |           |        |
| 7-hydroxycholesterol (alpha or beta)              | Lipid         | Tyrosol                   | 30.18%       | 35.48%       | 34.33%       | 0.43         | 0.75    | 0.71    | -3.02   | 4.44   | 0.71    | 2.45    | -1.38   | 6.28   | 0.21         | 0.32         | 0.72    | 1.21    | -2.46   | 4.88   | 0.52    | 2.87    | -0.90 | 6.84   | 0.21  | 0.03  | 0.25     | 1.07  | -2.08 | 2.43  | 0.88        | 2.69  | 0.38     | 5.01  | 0.02     | 0.02    | 0.22      | 0.55   | -1.14    | 3.05  | 0.34  | 0.34     |             |           |          |               |           |           |           |              |           |        |



|           |        |        |        |      |      |       |       |      |      |       |       |      |      |      |      |       |       |      |      |      |       |      |      |      |      |       |       |      |      |       |       |      |      |      |      |       |       |      |      |       |       |      |      |           |      |           |    |
|-----------|--------|--------|--------|------|------|-------|-------|------|------|-------|-------|------|------|------|------|-------|-------|------|------|------|-------|------|------|------|------|-------|-------|------|------|-------|-------|------|------|------|------|-------|-------|------|------|-------|-------|------|------|-----------|------|-----------|----|
| X - 24972 | 29.72% | 34.10% | 36.18% | 0.26 | 0.63 | 3.13  | -0.63 | 6.89 | 0.10 | 2.05  | -1.65 | 5.75 | 0.28 | 0.45 | 0.77 | 2.36  | -1.36 | 6.09 | 0.21 | 1.02 | -2.67 | 4.70 | 0.28 | 0.24 | 0.62 | 1.01  | -1.28 | 3.30 | 0.39 | 1.95  | -0.30 | 4.20 | 0.09 | 0.57 | 0.87 | 0.43  | -1.82 | 2.67 | 0.71 | 1.16  | -1.06 | 3.38 | 0.09 | LC/MS Neg | 3880 | 385.16936 | NA |
| X - 25433 | 26.96% | 36.41% | 36.64% | 0.22 | 0.59 | -2.96 | -6.75 | 0.83 | 0.13 | -0.41 | -4.20 | 3.39 | 0.83 | 0.28 | 0.69 | -2.23 | -5.98 | 1.52 | 0.24 | 0.39 | -3.37 | 4.14 | 0.83 | 0.64 | 0.86 | -0.63 | -2.95 | 1.68 | 0.59 | -1.12 | -3.44 | 1.19 | 0.34 | 0.88 | 0.95 | -0.07 | -2.34 | 2.19 | 0.95 | -0.51 | -2.78 | 1.76 | 0.34 | LC/MS Neg | 4046 | 287.61162 | NA |

Coef., coefficient; CI, confidence interval; q-value, false discovery rate-adjusted p-value; RI, retention index.

According to the Metabolomics Standards Initiative,<sup>1</sup> metabolites with Level 1 identification were labeled by their chemical names; metabolites at Level 2 were indicated by \*\*\* after chemical name; metabolites at Level 3 were indicated by \*\*\*\* after chemical name; and unknown metabolites were labeled as "X - " followed by numbers. The overall statistical significance was assessed using a Wald test. Model 1 was adjusted for age, sex, provinces, batch, urbanization index (tertiles: ≤64.2, 64.2-81.5, >81.5), per capita household income (tertiles: ≤10, 10-21.6, >21.6), education, total energy intake, animal-source food consumption, sodium consumption, physical activity (tertiles: ≤57.4, 57.4-152, >152), smoking, alcohol intake, and Estimated glomerular filtration rate (eGFR). Model 2 was additionally adjusted for BMI.

**Table S12. Association between individual metabolites (>50% values below detection limits (BLD), reference=BLD) with systolic and diastolic blood pressure (SBP and DBP)**

| Metabolites                                      | Class                             | Pathway                             | BLD    | SBP     |        |         |         |       |         |         |         |       |        | DBP     |         |       |        |         |         |        |       |      |      | Platform        | RI     | Mass      | PUBCHEM  | CAS | KEGG |  |
|--------------------------------------------------|-----------------------------------|-------------------------------------|--------|---------|--------|---------|---------|-------|---------|---------|---------|-------|--------|---------|---------|-------|--------|---------|---------|--------|-------|------|------|-----------------|--------|-----------|----------|-----|------|--|
|                                                  |                                   |                                     |        | Model 1 |        |         |         |       | Model 2 |         |         |       |        | Model 1 |         |       |        |         | Model 2 |        |       |      |      |                 |        |           |          |     |      |  |
|                                                  |                                   |                                     |        | Coef.   | 95% CI | p-value | q-value | Coef. | 95% CI  | p-value | q-value | Coef. | 95% CI | p-value | q-value | Coef. | 95% CI | p-value | q-value |        |       |      |      |                 |        |           |          |     |      |  |
| 1,3,7-trimethylurate                             | Xenobiotics                       | Xanthine Metabolism                 | 70.97% | -0.96   | -4.30  | 2.38    | 0.57    | 0.81  | -1.07   | -4.35   | 2.22    | 0.52  | 0.80   | 0.13    | -1.90   | 2.17  | 0.90   | 0.97    | 0.05    | -1.93  | 2.03  | 0.96 | 0.98 | LC/MS Neg       | 1985   | 209.06801 | 79437    |     |      |  |
| 1,3-dimethylurate                                | Xenobiotics                       | Xanthine Metabolism                 | 63.59% | -0.87   | -4.05  | 2.30    | 0.59    | 0.82  | -0.99   | -4.12   | 2.13    | 0.53  | 0.80   | -0.66   | -2.59   | 1.28  | 0.50   | 0.81    | -0.75   | -2.63  | 1.13  | 0.43 | 0.80 | LC/MS Neg       | 1671.4 | 195.05236 | 70346    |     |      |  |
| 1,7-dimethylurate                                | Xenobiotics                       | Xanthine Metabolism                 | 50.69% | -1.02   | -4.06  | 2.01    | 0.51    | 0.78  | -0.77   | -3.76   | 2.22    | 0.61  | 0.85   | -1.24   | -3.08   | 0.61  | 0.19   | 0.57    | -1.04   | -2.84  | 0.75  | 0.25 | 0.70 | LC/MS Neg       | 1578.6 | 195.05236 | 91611    |     |      |  |
| 2-hydroxyacetaminophen sulfate*                  | Xenobiotics                       | Drug - Analgesics, Anesthetics      | 91.24% | 1.93    | -3.39  | 7.26    | 0.48    | 0.78  | 2.14    | -3.09   | 7.38    | 0.42  | 0.76   | 0.75    | -2.49   | 4.00  | 0.65   | 0.86    | 0.91    | -2.24  | 4.07  | 0.57 | 0.87 | LC/MS Neg       | 1674   | 246.00778 | 86290013 |     |      |  |
| 2-hydroxyibuprofen                               | Xenobiotics                       | Drug - Analgesics, Anesthetics      | 98.62% | 7.36    | -5.53  | 20.24   | 0.26    | 0.63  | 6.80    | -5.87   | 19.48   | 0.29  | 0.70   | 1.43    | -6.42   | 9.28  | 0.72   | 0.90    | 1.01    | -6.64  | 8.65  | 0.80 | 0.93 | LC/MS Neg       | 3462   | 221.11831 | 10443535 |     |      |  |
| 2-methoxyacetaminophen glucuronide*              | Xenobiotics                       | Drug - Analgesics, Anesthetics      | 94.70% | -1.10   | -7.83  | 5.63    | 0.75    | 0.90  | -0.24   | -6.87   | 6.40    | 0.94  | 0.98   | 0.61    | -3.49   | 4.71  | 0.77   | 0.92    | 1.28    | -2.72  | 5.27  | 0.53 | 0.85 | LC/MS Neg       | 1633   | 356.0987  | 14367271 |     |      |  |
| 2-methoxyacetaminophen sulfate*                  | Xenobiotics                       | Drug - Analgesics, Anesthetics      | 95.39% | -0.46   | -7.65  | 6.73    | 0.90    | 0.96  | -0.23   | -7.31   | 6.84    | 0.95  | 0.98   | 1.08    | -3.30   | 5.46  | 0.63   | 0.86    | 1.26    | -3.00  | 5.51  | 0.56 | 0.86 | LC/MS Neg       | 1949   | 260.02343 | 86290014 |     |      |  |
| 3-(cystein-S-yl)acetaminophen*                   | Xenobiotics                       | Drug - Analgesics, Anesthetics      | 97.24% | 2.68    | -6.51  | 11.87   | 0.57    | 0.81  | 3.16    | -5.88   | 12.20   | 0.49  | 0.79   | 2.24    | -3.35   | 7.83  | 0.43   | 0.75    | 2.61    | -2.83  | 8.05  | 0.35 | 0.75 | LC/MS Pos Early | 2420   | 271.07471 | 5233914  |     |      |  |
| 3-(methylthio)acetaminophen sulfate*             | Xenobiotics                       | Drug - Analgesics, Anesthetics      | 88.71% | 0.78    | -4.05  | 5.60    | 0.75    | 0.90  | 1.02    | -3.73   | 5.77    | 0.67  | 0.88   | 0.35    | -2.59   | 3.29  | 0.81   | 0.94    | 0.54    | -2.32  | 3.40  | 0.71 | 0.90 | LC/MS Neg       | 2265   | 276.00509 | NA       |     |      |  |
| 3-(N-acetyl-L-cystein-S-yl) acetaminophen        | Xenobiotics                       | Drug - Analgesics, Anesthetics      | 95.16% | -0.22   | -7.23  | 6.78    | 0.95    | 0.98  | 0.43    | -6.47   | 7.32    | 0.90  | 0.96   | 1.02    | -3.24   | 5.29  | 0.64   | 0.86    | 1.52    | -2.63  | 5.68  | 0.47 | 0.83 | LC/MS Neg       | 2094   | 311.07072 | 83967    |     |      |  |
| 3-ethylcatechol sulfate (2)                      | Xenobiotics                       | Food Component/Plant                | 70.97% | -1.67   | -5.02  | 1.68    | 0.33    | 0.68  | -1.29   | -4.59   | 2.01    | 0.44  | 0.77   | -0.30   | -2.34   | 1.74  | 0.77   | 0.92    | -0.01   | -2.00  | 1.98  | 0.99 | 1.00 | LC/MS Neg       | 3555   | 217.01761 | NA       |     |      |  |
| 3-hydroxy-2-methylpyridine sulfate               | Xenobiotics                       | Chemical                            | 54.84% | -0.42   | -3.46  | 2.62    | 0.79    | 0.92  | -0.08   | -3.07   | 2.92    | 0.96  | 0.98   | 0.02    | -1.83   | 1.88  | 0.98   | 0.99    | 0.29    | -1.52  | 2.09  | 0.76 | 0.91 | LC/MS Neg       | 1854   | 188.00252 | NA       |     |      |  |
| 3-methylxanthine                                 | Xenobiotics                       | Xanthine Metabolism                 | 62.21% | -0.58   | -3.79  | 2.63    | 0.72    | 0.89  | -0.55   | -3.70   | 2.61    | 0.73  | 0.90   | -0.23   | -2.18   | 1.73  | 0.82   | 0.94    | -0.20   | -2.10  | 1.70  | 0.84 | 0.94 | LC/MS Neg       | 1700   | 165.0418  | 70639    |     |      |  |
| 4-acetamidophenol                                | Xenobiotics                       | Drug - Analgesics, Anesthetics      | 88.48% | 0.30    | -4.40  | 5.00    | 0.90    | 0.96  | 0.80    | -3.82   | 5.43    | 0.73  | 0.90   | 0.60    | -2.26   | 3.45  | 0.68   | 0.89    | 0.98    | -1.81  | 3.77  | 0.49 | 0.84 | LC/MS Neg       | 2173.7 | 150.05605 | 1983     |     |      |  |
| 4-acetamidophenylglucuronide                     | Xenobiotics                       | Drug - Analgesics, Anesthetics      | 91.71% | 1.26    | -4.22  | 6.74    | 0.65    | 0.86  | 1.74    | -3.66   | 7.13    | 0.53  | 0.80   | 0.16    | -3.18   | 3.50  | 0.92   | 0.98    | 0.52    | -2.73  | 3.77  | 0.75 | 0.91 | LC/MS Neg       | 1400   | 326.08814 | 83944    |     |      |  |
| 4-acetaminophen sulfate                          | Xenobiotics                       | Drug - Analgesics, Anesthetics      | 84.79% | 2.41    | -1.79  | 6.61    | 0.26    | 0.63  | 2.66    | -1.48   | 6.79    | 0.21  | 0.63   | 1.26    | -1.30   | 3.82  | 0.34   | 0.69    | 1.44    | -1.05  | 3.93  | 0.26 | 0.70 | LC/MS Neg       | 1792   | 230.01287 | 83939    |     |      |  |
| 5-acetyl-amino-6-formylamino-3-methyluracil      | Xenobiotics                       | Xanthine Metabolism                 | 74.42% | -1.28   | -4.70  | 2.15    | 0.46    | 0.77  | -1.28   | -4.65   | 2.08    | 0.45  | 0.77   | -0.51   | -2.60   | 1.57  | 0.63   | 0.86    | -0.52   | -2.54  | 1.51  | 0.62 | 0.88 | LC/MS Polar     | 1424   | 225.06292 | 108214   |     |      |  |
| 5alpha-pregnan-3beta-ol,20-one sulfate           | Lipid                             | Progesterin Steroids                | 76.50% | 0.67    | -2.87  | 4.22    | 0.71    | 0.88  | 0.74    | -2.75   | 4.22    | 0.68  | 0.88   | 1.53    | -0.62   | 3.68  | 0.16   | 0.54    | 1.58    | -0.51  | 3.68  | 0.14 | 0.57 | LC/MS Neg       | 5136   | 397.20541 | NA       |     |      |  |
| 7-hydroxyindole sulfate                          | Amino Acid                        | Tryptophan Metabolism               | 63.36% | 3.07    | -0.06  | 6.21    | 0.05    | 0.32  | 2.83    | -0.26   | 5.92    | 0.07  | 0.43   | 1.04    | -0.87   | 2.96  | 0.29   | 0.65    | 0.85    | -1.01  | 2.72  | 0.37 | 0.76 | LC/MS Neg       | 1765   | 212.0023  | NA       |     |      |  |
| acesulfame                                       | Xenobiotics                       | Food Component/Plant                | 61.29% | -0.70   | -3.79  | 2.38    | 0.66    | 0.86  | -0.52   | -3.55   | 2.52    | 0.74  | 0.90   | 0.12    | -1.76   | 2.00  | 0.90   | 0.97    | 0.26    | -1.57  | 2.09  | 0.78 | 0.93 | LC/MS Neg       | 1581   | 161.98665 | 36573    |     |      |  |
| amoxicillin                                      | Xenobiotics                       | Drug - Antibiotic                   | 98.85% | -2.12   | -16.09 | 11.85   | 0.77    | 0.91  | 0.00    | -13.79  | 13.78   | 1.00  | 1.00   | -3.94   | -12.43  | 4.56  | 0.36   | 0.71    | -2.33   | -10.63 | 5.97  | 0.58 | 0.87 | LC/MS Neg       | 2365   | 364.09726 | 2171     |     |      |  |
| biliverdin                                       | Cofactors and Vitamins            | Hemoglobin and Porphyrin Metabolism | 56.45% | -1.89   | -4.94  | 1.16    | 0.22    | 0.59  | -1.65   | -4.65   | 1.36    | 0.28  | 0.69   | -0.36   | -2.22   | 1.50  | 0.70   | 0.90    | -0.17   | -1.98  | 1.64  | 0.85 | 0.95 | LC/MS Pos Late  | 1016   | 583.25512 | 5353439  |     |      |  |
| caffeine                                         | Xenobiotics                       | Xanthine Metabolism                 | 53.23% | -1.56   | -4.58  | 1.47    | 0.31    | 0.67  | -1.58   | -4.55   | 1.40    | 0.30  | 0.70   | -0.54   | -2.39   | 1.30  | 0.56   | 0.84    | -0.56   | -2.36  | 1.23  | 0.54 | 0.85 | LC/MS Pos Early | 2106   | 195.08766 | 2519     |     |      |  |
| chenodeoxycholic acid sulfate (1)                | Lipid                             | Secondary Bile Acid Metabolism      | 65.21% | -0.82   | -4.01  | 2.37    | 0.61    | 0.83  | -0.47   | -3.61   | 2.67    | 0.77  | 0.92   | 0.67    | -1.27   | 2.61  | 0.50   | 0.80    | 0.94    | -0.95  | 2.83  | 0.33 | 0.74 | LC/MS Neg       | 4548   | 235.11739 | NA       |     |      |  |
| cotinine                                         | Xenobiotics                       | Tobacco Metabolite                  | 55.76% | -0.79   | -3.83  | 2.25    | 0.61    | 0.83  | -0.48   | -3.48   | 2.51    | 0.75  | 0.91   | -0.85   | -2.70   | 1.00  | 0.37   | 0.71    | -0.62   | -2.42  | 1.19  | 0.50 | 0.84 | LC/MS Pos Early | 2213   | 177.10224 | 854019   |     |      |  |
| desmethylnaproxen sulfate                        | Xenobiotics                       | Drug - Analgesics, Anesthetics      | 99.77% | -19.81  | -50.90 | 11.28   | 0.21    | 0.58  | -14.20  | -44.94  | 16.54   | 0.36  | 0.74   | -27.25  | -46.03  | -8.48 | 5.E-03 | 0.08    | -23.08  | -41.48 | -4.68 | 0.01 | 0.19 | LC/MS Neg       | 2250   | 295.02818 | 184679   |     |      |  |
| diclofenac                                       | Xenobiotics                       | Drug - Analgesics, Anesthetics      | 97.47% | -2.49   | -12.12 | 7.14    | 0.61    | 0.83  | -2.58   | -12.05  | 6.89    | 0.59  | 0.84   | 1.66    | -4.21   | 7.52  | 0.58   | 0.84    | 1.59    | -4.12  | 7.29  | 0.58 | 0.87 | LC/MS Neg       | 4903   | 294.0094  | NA       |     |      |  |
| equol sulfate                                    | Xenobiotics                       | Food Component/Plant                | 66.36% | 3.50    | 0.31   | 6.68    | 0.03    | 0.25  | 3.14    | 0.00    | 6.29    | 0.05  | 0.36   | 2.61    | 0.67    | 4.55  | 0.01   | 0.11    | 2.34    | 0.45   | 4.23  | 0.02 | 0.20 | LC/MS Neg       | 3630   | 321.04383 | NA       |     |      |  |
| estrone 3-sulfate                                | Lipid                             | Estrogenic Steroids                 | 54.15% | 2.04    | -0.96  | 5.04    | 0.18    | 0.55  | 2.42    | -0.53   | 5.37    | 0.11  | 0.50   | 1.16    | -0.67   | 2.98  | 0.21   | 0.60    | 1.45    | -0.33  | 3.22  | 0.11 | 0.53 | LC/MS Neg       | 4417.3 | 349.11152 | 3001028  |     |      |  |
| ethyl glucuronide                                | Xenobiotics                       | Chemical                            | 92.17% | 2.29    | -3.34  | 7.92    | 0.42    | 0.75  | 1.80    | -3.75   | 7.35    | 0.52  | 0.80   | 2.98    | -0.44   | 6.40  | 0.09   | 0.40    | 2.61    | -0.72  | 5.95  | 0.12 | 0.56 | LC/MS Neg       | 793    | 221.06667 | 152226   |     |      |  |
| glucuronide of C10H18O2 (1)*                     | Partially Characterized Molecules | Partially Characterized Molecules   | 90.55% | 3.43    | -1.67  | 8.52    | 0.19    | 0.55  | 3.30    | -1.71   | 8.31    | 0.20  | 0.61   | 2.61    | -0.49   | 5.70  | 0.10   | 0.43    | 2.51    | -0.51  | 5.52  | 0.10 | 0.52 | LC/MS Neg       | 2728   | 345.1555  | NA       |     |      |  |
| glucuronide of C10H18O2 (7)*                     | Partially Characterized Molecules | Partially Characterized Molecules   | 75.12% | 0.47    | -3.00  | 3.94    | 0.79    | 0.92  | 0.31    | -3.11   | 3.72    | 0.86  | 0.96   | 0.53    | -1.58   | 2.64  | 0.62   | 0.86    | 0.40    | -1.65  | 2.46  | 0.70 | 0.89 | LC/MS Neg       | 3790   | 345.1555  | NA       |     |      |  |
| glycodeoxycholate                                | Lipid                             | Secondary Bile Acid Metabolism      | 50.00% | -0.64   | -3.62  | 2.35    | 0.67    | 0.87  | -0.83   | -3.77   | 2.10    | 0.58  | 0.83   | -0.74   | -2.55   | 1.08  | 0.42   | 0.75    | -0.89   | -2.65  | 0.88  | 0.32 | 0.74 | LC/MS Neg       | 5281   | 448.30684 | 3035026  |     |      |  |
| glycolithocholate                                | Lipid                             | Secondary Bile Acid Metabolism      | 51.84% | 0.19    | -2.79  | 3.18    | 0.90    | 0.96  | -0.16   | -3.11   | 2.78    | 0.91  | 0.96   | 0.60    | -1.22   | 2.42  | 0.52   | 0.81    | 0.33    | -1.45  | 2.10  | 0.72 | 0.90 | LC/MS Neg       | 5357.1 | 432.31193 | 115245   |     |      |  |
| glycosyl ceramide (d18:1/20:0, d16:1/22:0)*      | Lipid                             | Hexosylceramides (HCER)             | 51.84% | -0.62   | -4.04  | 2.79    | 0.72    | 0.89  | -0.17   | -3.53   | 3.20    | 0.92  | 0.97   | 0.79    | -1.28   | 2.87  | 0.45   | 0.76    | 1.15    | -0.87  | 3.17  | 0.26 | 0.71 | LC/MS Pos Late  | 3414   | 756.6348  | NA       |     |      |  |
| glycosyl-N-behenoyl-sphingadienine (d18:2/22:0)* | Lipid                             | Hexosylceramides (HCER)             | 47.70% | 0.09    | -3.21  | 3.39    | 0.96    | 0.98  | 0.69    | -2.57   | 3.95    | 0.68  | 0.88   | 0.55    | -1.46   | 2.55  | 0.59   | 0.85    | 1.01    | -0.95  | 2.97  | 0.31 | 0.74 | LC/MS Pos Late  | 3420   | 782.65045 | NA       |     |      |  |
| heme                                             | Cofactors and Vitamins            | Hemoglobin and Porphyrin Metabolism | 78.57% | -1.61   | -5.27  | 2.05    | 0.39    | 0.72  | -2.07   | -5.67   | 1.54    | 0.26  | 0.68   | -0.62   | -2.85   | 1.61  | 0.58   | 0.84    | -0.97   | -3.14  | 1.20  | 0.38 | 0.77 | LC/MS Pos Late  | 1124   | 616.1762  | 26945    |     |      |  |
| HEPES                                            | Xenobiotics                       | Chemical                            | 99.77% | -11.79  | -42.91 | 19.32   | 0.46    | 0.76  | -7.25   | -37.95  | 23.46   | 0.64  | 0.86   | -12.46  | -31.38  | 6.46  | 0.20   | 0.58    | -9.00   | -27.49 | 9.48  | 0.34 | 0.74 | LC/MS Neg       | 1022   | 237.09145 | 23831    |     |      |  |
| hydroxycotinine                                  | Xenobiotics                       | Tobacco Metabolite                  | 72.58% | 1.05    | -2.30  | 4.41    | 0.54    | 0.80  | 1.33    | -1.97   | 4.64    | 0.43  | 0.77   | 0.60    | -1.45   | 2.64  | 0.57   | 0.84    | 0.81    | -1.18  | 2.80  | 0.42 | 0.80 | LC/MS Pos Early | 2030   | 193.09716 | 10219774 |     |      |  |
| ibuprofen                                        | Xenobiotics                       | Drug - Analgesics, Anesthetics      | 96.77% | 3.92    | -4.61  | 12.46   | 0.37    | 0.71  | 3.34    | -5.06   | 11.74   | 0.44  | 0.77   | 2.84    | -2.35   | 8.04  | 0.28   | 0.65    | 2.40    | -2.66  | 7.46  | 0.35 | 0.75 | LC/MS Neg       | 4925   | 205.1234  | 3672     |     |      |  |
| indoleacetyl carnitine*                          | Amino Acid                        | Tryptophan Metabolism               | 58.29% | 0.32    | -2.84  | 3.48    | 0.84    | 0.94  | 0.09    | -3.02   | 3.20    | 0.96  | 0.98   | 0.15    | -1.78   | 2.07  | 0.88   | 0.96    | -0.03   | -1.91  | 1.84  | 0.97 | 0.99 | LC/MS Pos Early | 3114   | 319.16524 | NA       |     |      |  |
| indoleacetylglutamine                            | Amino Acid                        | Tryptophan Metabolism               | 55.76% | -0.09   | -3.21  | 3.02    | 0.95    | 0.98  | -0.23   | -3.30   | 2.84    | 0.88  | 0.96   | -0.04   | -1.94   | 1.86  | 0.97   | 0.99    | -0.14   | -1.99  | 1.70  | 0.88 | 0.95 | LC/MS Neg       | 2535   | 302.11463 | 25200879 |     |      |  |
| isoleucylglycine                                 | Peptide                           | Dipeptide                           | 50.00% | -3.64   | -6.75  |         |         |       |         |         |         |       |        |         |         |       |        |         |         |        |       |      |      |                 |        |           |          |     |      |  |

|           |        |        |        |       |      |      |       |        |       |      |      |       |        |      |      |      |       |        |      |      |      |                 |        |           |    |
|-----------|--------|--------|--------|-------|------|------|-------|--------|-------|------|------|-------|--------|------|------|------|-------|--------|------|------|------|-----------------|--------|-----------|----|
| X - 22509 | 80.41% | -1.25  | -5.04  | 2.53  | 0.51 | 0.78 | -1.78 | -5.51  | 1.95  | 0.35 | 0.73 | -0.07 | -2.37  | 2.24 | 0.95 | 0.99 | -0.46 | -2.71  | 1.78 | 0.68 | 0.89 | LC/MS Neg       | 3562   | 473.14626 | NA |
| X - 22520 | 55.76% | -2.42  | -5.42  | 0.59  | 0.11 | 0.44 | -2.07 | -5.03  | 0.90  | 0.17 | 0.59 | -1.77 | -3.60  | 0.06 | 0.06 | 0.33 | -1.50 | -3.28  | 0.28 | 0.10 | 0.50 | LC/MS Neg       | 4389   | 263.62842 | NA |
| X - 23583 | 54.61% | 1.04   | -2.05  | 4.13  | 0.51 | 0.78 | 1.00  | -2.04  | 4.04  | 0.52 | 0.80 | 0.18  | -1.71  | 2.06 | 0.85 | 0.95 | 0.15  | -1.68  | 1.98 | 0.87 | 0.95 | LC/MS Pos Early | 1112   | 116.07069 | NA |
| X - 23662 | 75.12% | 0.38   | -3.07  | 3.83  | 0.83 | 0.94 | 1.25  | -2.17  | 4.67  | 0.47 | 0.78 | 0.45  | -1.65  | 2.55 | 0.67 | 0.88 | 1.12  | -0.94  | 3.18 | 0.29 | 0.73 | LC/MS Pos Early | 2622   | 159.14892 | NA |
| X - 24295 | 49.54% | -0.58  | -3.61  | 2.45  | 0.71 | 0.88 | -0.42 | -3.41  | 2.56  | 0.78 | 0.92 | 0.07  | -1.77  | 1.92 | 0.94 | 0.98 | 0.19  | -1.61  | 1.99 | 0.83 | 0.94 | LC/MS Neg       | 1152   | 217.07139 | NA |
| X - 24344 | 62.90% | 0.09   | -3.05  | 3.23  | 0.96 | 0.98 | 0.57  | -2.52  | 3.67  | 0.72 | 0.90 | -0.10 | -2.01  | 1.81 | 0.92 | 0.98 | 0.28  | -1.59  | 2.14 | 0.77 | 0.93 | LC/MS Neg       | 3620   | 217.01742 | NA |
| X - 25217 | 70.05% | -0.49  | -3.84  | 2.86  | 0.77 | 0.91 | -0.58 | -3.88  | 2.71  | 0.73 | 0.90 | -0.05 | -2.09  | 1.99 | 0.96 | 0.99 | -0.13 | -2.11  | 1.86 | 0.90 | 0.96 | LC/MS Pos Early | 1423   | 146.06342 | NA |
| X - 25265 | 99.54% | -10.32 | -32.28 | 11.64 | 0.36 | 0.71 | -9.26 | -30.87 | 12.35 | 0.40 | 0.76 | -7.23 | -20.60 | 6.13 | 0.29 | 0.65 | -6.42 | -19.44 | 6.59 | 0.33 | 0.74 | LC/MS Pos Early | 517.4  | 346.00908 | NA |
| X - 25406 | 49.08% | -1.59  | -4.60  | 1.42  | 0.30 | 0.66 | -2.17 | -5.14  | 0.80  | 0.15 | 0.57 | 0.16  | -1.67  | 2.00 | 0.86 | 0.96 | -0.27 | -2.06  | 1.52 | 0.77 | 0.92 | LC/MS Neg       | 3645.6 | 201.11322 | NA |

Coef., coefficient; CI, confidence interval; q-value, false discovery rate-adjusted p-value; RI, retention index.

According to the Metabolomics Standards Initiative,<sup>1</sup> metabolites with Level 1 identification were labeled by their chemical names; metabolites at Level 2 were indicated by "\*" after chemical name; metabolites at Level 3 were indicated by "\*\*\*" after chemical name; and unknown metabolites were labeled as "X - " followed by numbers.

Model 1 was adjusted for age, sex, provinces, batch, urbanization index (tertiles: ≤64.2, 64.2-81.5, >81.5), per capita household income (tertiles: ≤10, 10-21.6, >21.6), education, total energy intake, animal-source food consumption, sodium consumption, physical activity (tertiles: ≤57.4, 57.4-152, >152), smoking, alcohol intake, and estimated glomerular filtration rate (eGFR). Model 2 was additionally adjusted for BMI.

**Table S13. Post-hoc analysis of the association between metabolite patterns with systolic and diastolic blood pressure (SBP and DBP, mmHg), Coefficient (95% CI)**

| Metabolites contributing to each pattern                                                               |                                                                                                                                                                       |                                                                                                                              | Eigen value | Variance explained | SBP                    | DBP                    |
|--------------------------------------------------------------------------------------------------------|-----------------------------------------------------------------------------------------------------------------------------------------------------------------------|------------------------------------------------------------------------------------------------------------------------------|-------------|--------------------|------------------------|------------------------|
| Pattern 1<br>(nucleotide, amino acid, and peptide)                                                     | pseudouridine;<br>2,3-dihydroxy-5-methylthio-4-pentenoate (DMTPA);<br>N-acetylthreonine;<br>N,N-dimethyl-pro-pro;<br>C-glycosyltryptophan;                            | orotidine;<br>hydroxy-N6,N6,N6-trimethyllysine;<br>5,6-dihydrouridine;<br>dimethylarginine (ADMA + SDMA);<br>N6-acetyllysine | 84.19       | 9.63%              | 2.29<br>(0.26, 4.32)*  | 0.51<br>(-0.74, 1.75)  |
| Pattern 2 (lipids, especially long chain fatty acids)                                                  | linoleate (18:2n6);<br>palmitate (16:0);<br>oleate/vaccenate (18:1);<br>10-heptadecenoate (17:1n7);<br>docosapentaenoate (DPA; 22:5n3);<br>hexadecadienoate (16:2n6); | 10-nonadecenoate (19:1n9);<br>margarate (17:0);<br>dihomolinoleate (20:2n6);<br>dihomolinolenate (20:3n3 or 3n6)             | 41.83       | 4.79%              | 1.87<br>(0.36, 3.38)*  | 1.52<br>(0.61, 2.44)** |
| Pattern 3<br>(sphingomyelins, eicosanoid, and short-chain fatty acids, and branched-chain amino acids) | sphingomyelin (d18:2/23:0, d18:1/23:1, d17:1/24:1);<br>3-methyl-2-oxobutyrate;<br>leukotriene B4;<br>5-HETE;<br>methionine sulfoxide;<br>butyrate/isobutyrate (4:0);  | 4-methyl-2-oxopentanoate;<br>1-(1-enyl-oleoyl)-GPE (P-18:1);<br>1-(1-enyl-palmitoyl)-GPE (P-16:0);<br>3-methyl-2-oxovalerate | 40.99       | 4.69%              | -1.08<br>(-2.98, 0.81) | -0.62<br>(-1.78, 0.53) |

Patterns were derived from principal component analysis followed by a varimax rotation of 874 metabolites in the metabolomics analysis sample (n=434). Coefficient (95% confidence interval) indicates SBP and DBP (mmHg) associated with each 1SD increase in metabolites pattern score in linear regression. Contributing metabolites are metabolites with the top 10 highest absolute loadings for the respective pattern. Metabolites are vertically ordered by their absolute values of loading (descending). The factor loading for each metabolite contributing to each pattern is listed in Table S2. Model was adjusted for age, sex, provinces, batch, urbanization index (tertiles:  $\leq 64.2$ , 64.2-81.5,  $>81.5$ ), per capita household income (tertiles:  $\leq 10$ , 10-21.6,  $>21.6$ ), education, total energy intake, animal-source food consumption, sodium consumption, physical activity (tertiles:  $\leq 57.4$ , 57.4-152,  $>152$ ), smoking, alcohol intake, estimated glomerular filtration rate (eGFR), and low-density lipoprotein cholesterol.

“\*” indicates p-value < 0.05; “\*\*” indicates p-value<0.01

**Table S14. Post-hoc analysis of the association between individual metabolites with systolic and diastolic blood pressure (SBP & DBP)**

| Metabolites                                            | Class        | Pathway                                              | SBP   |        |         |         | DBP   |        |         |         | Platform | RI   | Mass            | PUBCHEM | CAS    | KEGG     |             |
|--------------------------------------------------------|--------------|------------------------------------------------------|-------|--------|---------|---------|-------|--------|---------|---------|----------|------|-----------------|---------|--------|----------|-------------|
|                                                        |              |                                                      | Coef. | 95% CI | p-value | q-value | Coef. | 95% CI | p-value | q-value |          |      |                 |         |        |          |             |
| (14 or 15)-methylpalmitate (a17:0 or i17:0)            | Lipid        | Fatty Acid, Branched                                 | 1.10  | -2.20  | 4.41    | 0.51    | 0.81  | -0.04  | -2.06   | 1.98    | 0.97     | 0.99 | LC/MS Neg       | 5695    | 269.25 | 17903417 |             |
| (16 or 17)-methylstearate (a19:0 or i19:0)             | Lipid        | Fatty Acid, Branched                                 | 0.93  | -0.60  | 2.46    | 0.24    | 0.58  | 0.49   | -0.44   | 1.43    | 0.30     | 0.67 | LC/MS Neg       | 5993    | 297.28 | 3083779  | 2724-59-6   |
| (2 or 3)-decanoate (10:1n8 or n7)                      | Lipid        | Medium Chain Fatty Acid                              | 2.06  | -0.07  | 4.19    | 0.06    | 0.33  | 1.08   | -0.22   | 2.39    | 0.10     | 0.46 | LC/MS Neg       | 4976    | 169.12 | NA       |             |
| (2,4 or 2,5)-dimethylphenol sulfate                    | Xenobiotics  | Food Component/Plant                                 | 0.61  | -0.10  | 1.33    | 0.09    | 0.38  | 0.02   | -0.42   | 0.46    | 0.92     | 0.97 | LC/MS Neg       | 3474    | 201.02 | NA       |             |
| (N1) + N(8)-acetylsermidine                            | Amino Acid   | Polyamine Metabolism                                 | 1.19  | -1.86  | 4.23    | 0.44    | 0.76  | 1.03   | -0.82   | 2.89    | 0.27     | 0.65 | LC/MS Pos Early | 3080    | 188.18 | NA       |             |
| (R)-3-hydroxybutyrylcarnitine                          | Lipid        | Fatty Acid Metabolism (Acyl Carnitine, Hydroxy)      | 1.58  | 0.19   | 2.98    | 0.03    | 0.26  | 0.73   | -0.13   | 1.58    | 0.10     | 0.44 | LC/MS Pos Early | 2400    | 248.15 | 53481617 |             |
| (S)-3-hydroxybutyrylcarnitine                          | Lipid        | Fatty Acid Metabolism (Acyl Carnitine, Hydroxy)      | 1.86  | -0.15  | 3.87    | 0.07    | 0.36  | 0.56   | -0.67   | 1.79    | 0.37     | 0.71 | LC/MS Pos Early | 2340    | 248.15 | NA       |             |
| (S)-a-Amino-omega-caprolactam                          | Xenobiotics  | Food Component/Plant                                 | 3.29  | -0.22  | 6.80    | 0.07    | 0.35  | 1.69   | -0.45   | 3.84    | 0.12     | 0.50 | LC/MS Pos Early | 2332    | 129.10 | NA       |             |
| 1-(1-enyl-oleoyl)-GPE (P-18:1)*                        | Lipid        | Lysoplasmalogen                                      | -3.15 | -5.73  | -0.57   | 0.02    | 0.21  | -2.26  | -3.83   | -0.69   | 0.00     | 0.10 | LC/MS Pos Late  | 1566    | 464.31 | NA       |             |
| 1-(1-enyl-palmitoyl)-2-arachidonoyl-GPC (P-16:0/20:4)* | Lipid        | Plasmalogen                                          | 3.60  | 0.20   | 7.00    | 0.04    | 0.28  | 0.37   | -1.72   | 2.45    | 0.73     | 0.89 | LC/MS Pos Late  | 2154    | 766.57 | NA       |             |
| 1-(1-enyl-palmitoyl)-2-arachidonoyl-GPE (P-16:0/20:4)* | Lipid        | Plasmalogen                                          | 1.21  | -1.39  | 3.80    | 0.36    | 0.70  | 0.70   | -0.88   | 2.29    | 0.38     | 0.72 | LC/MS Pos Late  | 2270    | 724.53 | NA       |             |
| 1-(1-enyl-palmitoyl)-2-linoleoyl-GPC (P-16:0/18:2)*    | Lipid        | Plasmalogen                                          | 1.87  | -1.66  | 5.40    | 0.30    | 0.66  | 0.43   | -1.72   | 2.59    | 0.69     | 0.88 | LC/MS Pos Late  | 2226    | 742.57 | NA       |             |
| 1-(1-enyl-palmitoyl)-2-linoleoyl-GPE (P-16:0/18:2)*    | Lipid        | Plasmalogen                                          | 0.46  | -2.14  | 3.06    | 0.73    | 0.91  | 0.18   | -1.41   | 1.76    | 0.83     | 0.93 | LC/MS Pos Late  | 2351    | 700.53 | NA       |             |
| 1-(1-enyl-palmitoyl)-2-oleoyl-GPC (P-16:0/18:1)*       | Lipid        | Plasmalogen                                          | -0.58 | -4.26  | 3.11    | 0.76    | 0.92  | -1.02  | -3.26   | 1.23    | 0.37     | 0.71 | LC/MS Pos Late  | 2443    | 744.59 | NA       |             |
| 1-(1-enyl-palmitoyl)-2-oleoyl-GPE (P-16:0/18:1)*       | Lipid        | Plasmalogen                                          | -0.67 | -3.81  | 2.48    | 0.68    | 0.89  | -0.42  | -2.33   | 1.50    | 0.67     | 0.87 | LC/MS Pos Late  | 2600    | 702.54 | NA       |             |
| 1-(1-enyl-palmitoyl)-2-palmitoleoyl-GPC (P-16:0/16:1)* | Lipid        | Plasmalogen                                          | 0.13  | -2.30  | 2.55    | 0.92    | 0.97  | 0.00   | -1.48   | 1.48    | 1.00     | 1.00 | LC/MS Pos Late  | 2218    | 716.56 | NA       |             |
| 1-(1-enyl-palmitoyl)-2-palmitoyl-GPC (P-16:0/16:0)*    | Lipid        | Plasmalogen                                          | 2.11  | -1.61  | 5.82    | 0.27    | 0.61  | 1.03   | -1.24   | 3.30    | 0.37     | 0.71 | LC/MS Pos Late  | 2454    | 718.57 | 11146967 |             |
| 1-(1-enyl-palmitoyl)-GPE (P-16:0)*                     | Lipid        | Lysoplasmalogen                                      | -0.39 | -3.98  | 3.20    | 0.83    | 0.94  | -1.16  | -3.34   | 1.03    | 0.30     | 0.67 | LC/MS Pos Late  | 1547    | 480.34 | 10917802 |             |
| 1-(1-enyl-palmitoyl)-GPE (P-16:0)*                     | Lipid        | Lysoplasmalogen                                      | -2.11 | -4.88  | 0.66    | 0.14    | 0.47  | -1.31  | -3.00   | 0.38    | 0.13     | 0.51 | LC/MS Pos Late  | 1558    | 438.30 | NA       |             |
| 1-(1-enyl-stearoyl)-2-arachidonoyl-GPE (P-18:0/20:4)*  | Lipid        | Plasmalogen                                          | 0.67  | -1.88  | 3.23    | 0.60    | 0.86  | -0.23  | -1.79   | 1.33    | 0.77     | 0.91 | LC/MS Pos Late  | 2511    | 752.56 | 9547058  |             |
| 1-(1-enyl-stearoyl)-2-linoleoyl-GPE (P-18:0/18:2)*     | Lipid        | Plasmalogen                                          | -0.70 | -3.61  | 2.21    | 0.64    | 0.87  | -0.59  | -2.36   | 1.19    | 0.52     | 0.81 | LC/MS Pos Late  | 2633    | 728.56 | NA       |             |
| 1-(1-enyl-stearoyl)-2-oleoyl-GPE (P-18:0/18:1)         | Lipid        | Plasmalogen                                          | -1.45 | -3.93  | 1.03    | 0.25    | 0.60  | -1.11  | -2.62   | 0.40    | 0.15     | 0.54 | LC/MS Pos Late  | 2950    | 730.57 | NA       | 144371-68-6 |
| 1-(1-enyl-stearoyl)-GPE (P-18:0)*                      | Lipid        | Lysoplasmalogen                                      | -2.71 | -5.46  | 0.03    | 0.05    | 0.33  | -2.12  | -3.79   | -0.45   | 0.01     | 0.17 | LC/MS Pos Late  | 1649    | 466.33 | NA       |             |
| 1,2,3-benzenetriol sulfate (2)                         | Xenobiotics  | Chemical                                             | -0.22 | -0.69  | 0.26    | 0.36    | 0.71  | -0.10  | -0.39   | 0.19    | 0.52     | 0.81 | LC/MS Neg       | 1709    | 204.98 | NA       |             |
| 1,2-dilinoeloyl-GPC (18:2/18:2)                        | Lipid        | Phosphatidylcholine (PC)                             | 1.48  | -1.80  | 4.77    | 0.37    | 0.71  | 0.53   | -1.47   | 2.53    | 0.60     | 0.85 | LC/MS Pos Late  | 2006    | 782.57 | 5288075  | 998-06-1    |
| 1,2-dipalmitoyl-GPC (16:0/16:0)                        | Lipid        | Phosphatidylcholine (PC)                             | 5.40  | -0.21  | 11.00   | 0.06    | 0.33  | 0.69   | -2.75   | 4.12    | 0.69     | 0.88 | LC/MS Pos Late  | 2365    | 734.57 | 452110   | 63-89-8     |
| 1,5-anhydroglucitol (1,5-AG)                           | Carbohydrate | Glycolysis, Gluconeogenesis, and Pyruvate Metabolism | 0.64  | -1.14  | 2.42    | 0.48    | 0.79  | -0.23  | -1.32   | 0.85    | 0.67     | 0.87 | LC/MS Neg       | 802     | 163.06 | 64960    | 154-58-5    |
| 10-heptadecenoate (17:1n7)                             | Lipid        | Long Chain Monounsaturated Fatty Acid                | 2.69  | 0.51   | 4.87    | 0.02    | 0.21  | 1.94   | 0.62    | 3.27    | 0.00     | 0.10 | LC/MS Neg       | 5555    | 267.23 | 5312435  | 29743-97-3  |
| 10-nonadecenoate (19:1n9)                              | Lipid        | Long Chain Monounsaturated Fatty Acid                | 2.06  | 0.14   | 3.98    | 0.04    | 0.28  | 1.37   | 0.20    | 2.54    | 0.02     | 0.23 | LC/MS Neg       | 5780    | 295.26 | 5312513  | 73033-09-7  |
| 10-undecenoate (11:1n1)                                | Lipid        | Medium Chain Fatty Acid                              | 0.52  | -1.32  | 2.36    | 0.58    | 0.85  | 0.53   | -0.59   | 1.65    | 0.36     | 0.70 | LC/MS Neg       | 5085.8  | 183.14 | 14891    | 1333-28-4   |
| 11beta-hydroxyandrostosterone glucuronide              | Lipid        | Androgenic Steroids                                  | 1.20  | -0.48  | 2.88    | 0.16    | 0.50  | 1.06   | 0.04    | 2.08    | 0.04     | 0.30 | LC/MS Neg       | 4228    | 481.24 | NA       |             |
| 13-HODE + 9-HODE                                       | Lipid        | Fatty Acid, Monohydroxy                              | -0.69 | -2.07  | 0.69    | 0.33    | 0.68  | -0.01  | -0.86   | 0.83    | 0.98     | 0.99 | LC/MS Neg       | 5275    | 295.23 | 43013    |             |
| 16a-hydroxy DHEA 3-sulfate                             | Lipid        | Androgenic Steroids                                  | 0.86  | -0.45  | 2.17    | 0.20    | 0.55  | 0.34   | -0.45   | 1.14    | 0.40     | 0.74 | LC/MS Neg       | 4240    | 383.15 | NA       |             |
| 16-hydroxypalmitate                                    | Lipid        | Fatty Acid, Monohydroxy                              | 2.72  | 0.16   | 5.28    | 0.04    | 0.28  | 1.38   | -0.19   | 2.94    | 0.08     | 0.42 | LC/MS Neg       | 5236.2  | 271.23 | 10466    | 506-13-8    |
| 17alpha-hydroxypregnenolone 3-sulfate                  | Lipid        | Pregnenolone Steroids                                | 0.69  | -0.74  | 2.11    | 0.34    | 0.69  | -0.23  | -1.10   | 0.64    | 0.61     | 0.85 | LC/MS Neg       | 4800    | 411.18 | 152971   | 28901-70-4  |
| 1-arachidonoyl-GPA (20:4)                              | Lipid        | Lysophospholipid                                     | -0.34 | -1.94  | 1.25    | 0.67    | 0.89  | -0.70  | -1.67   | 0.27    | 0.16     | 0.55 | LC/MS Neg       | 5499    | 457.24 | NA       | 799268-65-8 |
| 1-arachidonoyl-GPC* (20:4)*                            | Lipid        | Lysophospholipid                                     | 2.72  | -0.60  | 6.04    | 0.11    | 0.42  | 1.18   | -0.85   | 3.21    | 0.25     | 0.65 | LC/MS Pos Late  | 1460    | 544.34 | NA       |             |
| 1-arachidonoyl-GPE (20:4n6)*                           | Lipid        | Lysophospholipid                                     | 4.42  | 0.88   | 7.96    | 0.01    | 0.20  | 2.51   | 0.35    | 4.67    | 0.02     | 0.23 | LC/MS Pos Late  | 1470    | 502.29 | 42607465 |             |
| 1-arachidonoyl-GPI* (20:4)*                            | Lipid        | Lysophospholipid                                     | 2.40  | -1.04  | 5.84    | 0.17    | 0.52  | 2.94   | 0.85    | 5.02    | 0.01     | 0.11 | LC/MS Neg       | 5482    | 619.29 | NA       |             |
| 1-arachidonoylglycerol (20:4)                          | Lipid        | Monoacylglycerol                                     | 1.27  | -0.17  | 2.70    | 0.08    | 0.37  | 0.95   | 0.07    | 1.82    | 0.03     | 0.27 | LC/MS Neg       | 6250    | 303.23 | 5282281  | 35474-99-8  |
| 1-carboxyethylisoleucine                               | Amino Acid   | Leucine, Isoleucine and Valine Metabolism            | 0.96  | -0.98  | 2.90    | 0.33    | 0.68  | 0.76   | -0.42   | 1.94    | 0.21     | 0.60 | LC/MS Neg       | 2628    | 202.11 | NA       |             |
| 1-carboxyethylleucine                                  | Amino Acid   | Leucine, Isoleucine and Valine Metabolism            | 0.80  | -1.31  | 2.90    | 0.46    | 0.77  | 0.22   | -1.06   | 1.50    | 0.74     | 0.89 | LC/MS Neg       | 2663    | 202.11 | NA       |             |
| 1-carboxyethylphenylalanine                            | Amino Acid   | Phenylalanine Metabolism                             | 3.10  | 0.51   | 5.70    | 0.02    | 0.22  | 1.79   | 0.21    | 3.38    | 0.03     | 0.24 | LC/MS Neg       | 2844    | 236.09 | NA       |             |
| 1-carboxyethyltyrosine                                 | Amino Acid   | Tyrosine Metabolism                                  | 1.35  | -0.38  | 3.07    | 0.13    | 0.46  | 0.44   | -0.61   | 1.50    | 0.41     | 0.74 | LC/MS Neg       | 1846    | 252.09 | NA       |             |
| 1-carboxyethylvaline                                   | Amino Acid   | Leucine, Isoleucine and Valine Metabolism            | 1.19  | -1.27  | 3.65    | 0.34    | 0.69  | 0.47   | -1.03   | 1.97    | 0.53     | 0.82 | LC/MS Neg       | 2008    | 188.09 | NA       |             |
| 1-dihomo-linolenylglycerol (20:3)                      | Lipid        | Monoacylglycerol                                     | 1.44  | 0.05   | 2.82    | 0.04    | 0.29  | 1.29   | 0.46    | 2.13    | 0.00     | 0.08 | LC/MS Neg       | 6400    | 305.25 | NA       |             |
| 1-dihomo-linolenylglycerol (20:2)                      | Lipid        | Monoacylglycerol                                     | 1.40  | 0.14   | 2.66    | 0.03    | 0.27  | 1.21   | 0.45    | 1.98    | 0.00     | 0.07 | LC/MS Neg       | 6800    | 307.26 | NA       |             |
| 1-docosahexaenoylglycerol (22:6)                       | Lipid        | Monoacylglycerol                                     | 0.27  | -0.66  | 1.20    | 0.57    | 0.84  | 0.30   | -0.27   | 0.86    | 0.30     | 0.67 | LC/MS Neg       | 6150    | 309.22 | NA       |             |
| 1-lignoceryl-GPC (24:0)                                | Lipid        | Lysophospholipid                                     | 1.36  | -0.38  | 3.10    | 0.13    | 0.46  | 0.74   | -0.32   | 1.81    | 0.17     | 0.56 | LC/MS Pos Late  | 1907    | 608.46 | NA       | 325171-59-3 |
| 1-linolenylglycerol (18:3)                             | Lipid        | Monoacylglycerol                                     | 0.91  | -0.33  | 2.15    | 0.15    | 0.49  | 0.89   | 0.13    | 1.64    | 0.02     | 0.23 | LC/MS Neg       | 6214    | 277.22 | 53480978 | 124151-74-2 |
| 1-linolenyl-GPC (18:3)*                                | Lipid        | Lysophospholipid                                     | 0.17  | -2.29  | 2.63    | 0.89    | 0.96  | 0.02   | -1.48   | 1.52    | 0.98     | 0.99 | LC/MS Pos Late  | 1410    | 518.32 | NA       |             |
| 1-linolenyl-2-arachidonoyl-GPC (18:2/20:4n6)*          | Lipid        | Phosphatidylcholine (PC)                             | 3.11  | -0.19  | 6.41    | 0.07    | 0.35  | 1.13   | -0.89   | 3.15    | 0.27     | 0.65 | LC/MS Pos Late  | 1969    | 806.57 | NA       |             |
| 1-linolenyl-2-linolenyl-GPC (18:2/18:3)*               | Lipid        | Phosphatidylcholine (PC)                             | -0.48 | -2.21  | 1.25    | 0.59    | 0.85  | -0.03  | -1.08   | 1.02    | 0.96     | 0.98 | LC/MS Pos Late  | 1939    | 780.55 | NA       |             |
| 1-linolenylglycerol (18:2)                             | Lipid        | Monoacylglycerol                                     | 1.35  | -0.06  | 2.76    | 0.06    | 0.33  | 1.37   | 0.52    | 2.23    | 0.00     | 0.07 | LC/MS Neg       | 6477    | 279.23 | 5283469  | 2277-28-3   |
| 1-linolenyl-GPA (18:2)*                                | Lipid        | Lysophospholipid                                     | -0.76 | -2.72  | 1.21    | 0.45    | 0.76  | -0.42  | -1.62   | 0.78    | 0.49     | 0.80 | LC/MS Neg       | 5483    | 433.24 | NA       |             |
| 1-linolenyl-GPE (18:2)                                 | Lipid        | Lysophospholipid                                     | 0.82  | -3.38  | 5.01    | 0.70    | 0.91  | 1.01   | -1.55   | 3.57    | 0.44     | 0.76 | LC/MS Pos Late  | 1465    | 520.34 | 11988421 |             |
| 1-linolenyl-GPE (18:2)*                                | Lipid        | Lysophospholipid                                     | 1.92  | -0.86  | 4.69    | 0.17    | 0.52  | 1.55   | -0.14   | 3.23    | 0.07     | 0.40 | LC/MS Pos Late  | 1482    | 478.29 | 52925130 |             |
| 1-linolenyl-GPG (18:2)*                                | Lipid        | Lysophospholipid                                     | 1.70  | -0.18  | 3.57    | 0.08    | 0.36  | 1.88   | 0.75    | 3.02    | 0.00     | 0.05 | LC/MS Neg       | 5516    | 507.27 | NA       |             |
| 1-linolenyl-GPI* (18:2)*                               | Lipid        | Lysophospholipid                                     | 2.72  | -0.13  | 5.56    | 0.06    | 0.34  | 2.57   | 0.85    | 4.30    | 0.00     | 0.09 | LC/MS Neg       | 5494    | 595.29 | NA       |             |
| 1-methyl-4-imidazoleacetate                            | Amino Acid   | Histidine Metabolism                                 | 2.23  | -0.72  | 5.18    | 0.14    | 0.48  | 1.53   | -0.27   | 3.32    | 0.10     | 0.44 | LC/MS Pos Early | 2064    | 141.07 | 75810    | 2625-49-2   |
| 1-methyl-5-imidazoleacetate                            | Amino Acid   |                                                      |       |        |         |         |       |        |         |         |          |      |                 |         |        |          |             |

|                                                     |             |                                                         |       |       |       |      |      |       |       |       |      |      |                 |        |        |         |                     |         |
|-----------------------------------------------------|-------------|---------------------------------------------------------|-------|-------|-------|------|------|-------|-------|-------|------|------|-----------------|--------|--------|---------|---------------------|---------|
| 3-hydroxy-3-methylglutarate                         | Lipid       | Mevalonate Metabolism                                   | 2.08  | -1.27 | 5.44  | 0.22 | 0.57 | 1.38  | -0.66 | 3.43  | 0.18 | 0.57 | LC/MS Polar     | 2850   | 161.05 | 1662    | 503-49-1            | C03761  |
| 3-hydroxyadipate*                                   | Lipid       | Fatty Acid, Dicarboxylate                               | -0.08 | -1.62 | 1.45  | 0.91 | 0.96 | 0.65  | -0.28 | 1.59  | 0.17 | 0.56 | LC/MS Polar     | 3131   | 161.05 | 151913  |                     |         |
| 3-hydroxybutyrate (BHBA)                            | Lipid       | Ketone Bodies                                           | -0.06 | -1.42 | 1.31  | 0.94 | 0.97 | 0.10  | -0.74 | 0.93  | 0.82 | 0.93 | LC/MS Polar     | 1444   | 103.04 | 441     | 625-72-9            | C01089  |
| 3-hydroxybutyrylglycine                             | Lipid       | Fatty Acid Metabolism (Acyl Glycine)                    | 0.42  | -0.95 | 1.80  | 0.54 | 0.83 | 0.16  | -0.68 | 1.00  | 0.71 | 0.88 | LC/MS Pos Early | 978    | 162.08 | NA      |                     |         |
| 3-hydroxydecanoate                                  | Lipid       | Fatty Acid, Monohydroxy                                 | 2.64  | 0.59  | 4.68  | 0.01 | 1.17 | 1.65  | 0.41  | 2.89  | 0.01 | 0.14 | LC/MS Neg       | 4634.7 | 187.13 | 26612   | 5561-87-5           |         |
| 3-hydroxyhexanoate                                  | Lipid       | Fatty Acid, Monohydroxy                                 | 2.42  | 0.15  | 4.69  | 0.04 | 0.28 | 1.60  | 0.21  | 2.98  | 0.02 | 0.23 | LC/MS Neg       | 1725   | 131.07 | 151492  | 10191-24-9          |         |
| 3-hydroxyhippurate                                  | Xenobiotics | Benzoate Metabolism                                     | -0.45 | -1.19 | 0.29  | 0.23 | 0.58 | -0.16 | -0.61 | 0.30  | 0.50 | 0.80 | LC/MS Neg       | 1687   | 194.05 | 450268  | 1637-75-8           |         |
| 3-hydroxyisobutyrate                                | Amino Acid  | Leucine, Isoleucine and Valine Metabolism               | 2.27  | 0.30  | 4.24  | 0.02 | 0.25 | 1.03  | -0.18 | 2.23  | 0.09 | 0.44 | LC/MS Polar     | 1619   | 103.04 | 87      | 2068-83-9           | C06001  |
| 3-hydroxylaurate                                    | Lipid       | Fatty Acid, Monohydroxy                                 | 1.89  | 0.14  | 3.64  | 0.03 | 0.27 | 0.96  | -0.11 | 2.03  | 0.08 | 0.42 | LC/MS Neg       | 5175   | 215.17 | 94216   | 53941-38-1          |         |
| 3-hydroxyoctanoate                                  | Lipid       | Fatty Acid, Monohydroxy                                 | 2.00  | -0.20 | 4.21  | 0.08 | 0.36 | 1.80  | 0.46  | 3.14  | 0.01 | 0.13 | LC/MS Neg       | 3446   | 159.10 | 26613   | 88930-08-9          |         |
| 3-hydroxyoctanoyl carnitine (1)                     | Lipid       | Fatty Acid Metabolism (Acyl Carnitine, Hydroxy)         | 2.58  | 1.05  | 4.11  | 0.00 | 0.07 | 1.42  | 0.49  | 2.36  | 0.00 | 0.08 | LC/MS Pos Late  | 785    | 304.21 | NA      |                     |         |
| 3-hydroxyoctanoyl carnitine (2)                     | Lipid       | Fatty Acid Metabolism (Acyl Carnitine, Hydroxy)         | 2.29  | 0.74  | 3.84  | 0.00 | 0.11 | 1.41  | 0.46  | 2.35  | 0.00 | 0.09 | LC/MS Pos Early | 3490   | 304.21 | NA      |                     |         |
| 3-hydroxypyridine sulfate                           | Xenobiotics | Chemical                                                | 0.64  | -0.14 | 1.42  | 0.11 | 0.42 | 0.17  | -0.31 | 0.64  | 0.49 | 0.80 | LC/MS Neg       | 1595.5 | 173.99 | NA      | 1955-23-3           |         |
| 3-hydroxysebacate                                   | Lipid       | Fatty Acid, Monohydroxy                                 | 0.74  | -0.50 | 1.98  | 0.24 | 0.58 | 0.71  | -0.04 | 1.47  | 0.06 | 0.37 | LC/MS Polar     | 2411   | 217.11 | 3017884 | 73141-46-5          |         |
| 3-hydroxystachydrine*                               | Xenobiotics | Food Component/Plant                                    | 0.36  | -0.05 | 0.76  | 0.09 | 0.37 | 0.28  | 0.03  | 0.52  | 0.03 | 0.26 | LC/MS Pos Early | 1049   | 160.10 | 442640  |                     |         |
| 3-indoleglyoxylic acid                              | Xenobiotics | Food Component/Plant                                    | 0.37  | -3.00 | 3.73  | 0.83 | 0.94 | -0.23 | -2.28 | 1.82  | 0.83 | 0.93 | LC/MS Neg       | 2150   | 188.03 | NA      |                     |         |
| 3-indoxyl sulfate                                   | Amino Acid  | Tryptophan Metabolism                                   | -2.07 | -3.66 | -0.48 | 0.01 | 0.17 | -0.86 | -1.83 | 0.12  | 0.08 | 0.42 | LC/MS Neg       | 2222.2 | 212.00 | 10258   | 2642-37-7           |         |
| 3-methoxycatechol sulfate (1)                       | Xenobiotics | Benzoate Metabolism                                     | -0.37 | -0.95 | 0.20  | 0.20 | 0.55 | -0.17 | -0.52 | 0.18  | 0.34 | 0.70 | LC/MS Neg       | 2163   | 219.00 | NA      |                     |         |
| 3-methoxytyramine sulfate                           | Amino Acid  | Tyrosine Metabolism                                     | 0.54  | -1.85 | 2.93  | 0.66 | 0.88 | -0.46 | -1.92 | 0.99  | 0.53 | 0.82 | LC/MS Neg       | 1722   | 246.04 | NA      |                     |         |
| 3-methoxytyrosine                                   | Amino Acid  | Tyrosine Metabolism                                     | 1.41  | -1.55 | 4.38  | 0.35 | 0.69 | 0.18  | -1.63 | 1.99  | 0.84 | 0.93 | LC/MS Pos Early | 2555   | 212.09 | 1670    | 300-48-1            |         |
| 3-methyl catechol sulfate (1)                       | Xenobiotics | Benzoate Metabolism                                     | 0.52  | -0.21 | 1.24  | 0.16 | 0.50 | 0.05  | -0.39 | 0.49  | 0.83 | 0.93 | LC/MS Neg       | 2790   | 203.00 | NA      |                     |         |
| 3-methyl-2-oxobutyrate                              | Amino Acid  | Leucine, Isoleucine and Valine Metabolism               | 1.19  | 0.21  | 2.17  | 0.02 | 0.21 | 0.57  | -0.03 | 1.16  | 0.06 | 0.37 | LC/MS Neg       | 1465   | 115.04 | 49      | 3715-29-5           | C00141  |
| 3-methyl-2-oxovalerate                              | Amino Acid  | Leucine, Isoleucine and Valine Metabolism               | 1.82  | 0.17  | 3.47  | 0.03 | 0.27 | 1.07  | 0.06  | 2.08  | 0.04 | 0.28 | LC/MS Neg       | 2064.2 | 129.06 | 47      | 1460-34-0;51829-07- | C00671  |
| 3-methylglutaconate                                 | Amino Acid  | Leucine, Isoleucine and Valine Metabolism               | 1.74  | -1.16 | 4.64  | 0.24 | 0.58 | 0.28  | -1.49 | 2.05  | 0.76 | 0.90 | LC/MS Polar     | 2700   | 99.05  | 1551553 | 5746-90-7           |         |
| 3-methylglutaryl carnitine (2)                      | Amino Acid  | Leucine, Isoleucine and Valine Metabolism               | 0.02  | -1.14 | 1.19  | 0.97 | 0.99 | -0.40 | -1.11 | 0.31  | 0.27 | 0.65 | LC/MS Pos Early | 2687   | 290.16 | 128145  |                     |         |
| 3-methylisidine                                     | Amino Acid  | Histidine Metabolism                                    | -0.08 | -0.95 | 0.78  | 0.85 | 0.95 | -0.36 | -0.89 | 0.17  | 0.18 | 0.57 | LC/MS Neg       | 906.3  | 168.08 | 64969   | 368-16-1            | C01152  |
| 3-phenylpropionate (hydrocinamate)                  | Xenobiotics | Benzoate Metabolism                                     | -0.24 | -1.13 | 0.65  | 0.60 | 0.86 | -0.24 | -0.78 | 0.30  | 0.38 | 0.72 | LC/MS Neg       | 2860   | 149.06 | 107     | 501-52-0            | C05629  |
| 3-sulfo-L-alanine                                   | Amino Acid  | Methionine, Cysteine, SAM and Taurine Metabolism        | -0.12 | -1.25 | 1.01  | 0.83 | 0.94 | 0.20  | -0.49 | 0.89  | 0.57 | 0.83 | LC/MS Polar     | 2890   | 168.00 | 72886   | 498-40-8            | C00506  |
| 3-ureidopropionate                                  | Nucleotide  | Pyrimidine Metabolism, Uracil containing                | 0.72  | -1.58 | 3.01  | 0.54 | 0.83 | 0.29  | -1.11 | 1.69  | 0.69 | 0.87 | LC/MS Pos Early | 875    | 133.06 | 111     | 462-88-4            | C02642  |
| 4-acetamidobutanoate                                | Amino Acid  | Polyamine Metabolism                                    | -0.03 | -0.63 | 0.56  | 0.91 | 0.96 | -0.20 | -0.56 | 0.17  | 0.29 | 0.65 | LC/MS Pos Early | 1350   | 146.08 | 18189   | 3025-96-5           | C02946  |
| 4-acetylcatechol sulfate (1)                        | Xenobiotics | Food Component/Plant                                    | -0.88 | -1.97 | 0.21  | 0.11 | 0.44 | -0.37 | -1.04 | 0.29  | 0.27 | 0.65 | LC/MS Neg       | 1774   | 203.00 | NA      |                     |         |
| 4-acetylphenyl sulfate                              | Xenobiotics | Benzoate Metabolism                                     | -0.46 | -1.48 | 0.56  | 0.38 | 0.71 | -0.35 | -0.97 | 0.27  | 0.27 | 0.65 | LC/MS Neg       | 2375   | 215.00 | 4684006 |                     |         |
| 4-allylcatechol sulfate                             | Xenobiotics | Benzoate Metabolism                                     | -0.21 | -1.11 | 0.69  | 0.65 | 0.88 | -0.32 | -0.87 | 0.23  | 0.25 | 0.65 | LC/MS Neg       | 3597.7 | 229.02 | NA      |                     |         |
| 4-allylphenol sulfate                               | Xenobiotics | Food Component/Plant                                    | 1.03  | -0.04 | 2.11  | 0.06 | 0.33 | -0.01 | -0.67 | 0.65  | 0.97 | 0.99 | LC/MS Neg       | 3805   | 213.02 | NA      |                     |         |
| 4-ethylcatechol sulfate                             | Xenobiotics | Benzoate Metabolism                                     | 0.32  | -0.34 | 0.99  | 0.34 | 0.69 | 0.04  | -0.36 | 0.45  | 0.83 | 0.93 | LC/MS Neg       | 3346   | 217.02 | NA      |                     |         |
| 4-ethylphenyl sulfate                               | Xenobiotics | Benzoate Metabolism                                     | -0.30 | -0.94 | 0.34  | 0.36 | 0.70 | -0.27 | -0.66 | 0.13  | 0.18 | 0.57 | LC/MS Neg       | 3580   | 201.02 | NA      | 123-07-9            | C13637  |
| 4-guanidinobutanoate                                | Amino Acid  | Guanidino and Acetamido Metabolism                      | -0.13 | -1.85 | 1.58  | 0.88 | 0.95 | -0.68 | -1.72 | 0.36  | 0.20 | 0.60 | LC/MS Pos Early | 2320   | 146.09 | 500     | 463-003;463-00-3    | C01035  |
| 4-HDOHE                                             | Lipid       | Docosanoid                                              | -0.85 | -2.02 | 0.31  | 0.15 | 0.49 | -0.44 | -1.15 | 0.27  | 0.23 | 0.63 | LC/MS Neg       | 5394   | 343.23 | NA      | 9006-40-4           |         |
| 4-hydroxycholethanolol                              | Xenobiotics | Chemical                                                | -0.18 | -1.16 | 0.79  | 0.71 | 0.91 | 0.06  | -0.53 | 0.66  | 0.83 | 0.93 | LC/MS Neg       | 4427   | 244.91 | 34217   | 28343-61-5          |         |
| 4-hydroxyhippurate                                  | Xenobiotics | Benzoate Metabolism                                     | 0.00  | -1.35 | 1.36  | 1.00 | 1.00 | 0.10  | -0.72 | 0.93  | 0.81 | 0.92 | LC/MS Neg       | 1475   | 194.05 | 151012  | 2482-25-9           |         |
| 4-hydroxyphenylacetate                              | Amino Acid  | Phenylalanine Metabolism                                | 0.20  | -1.47 | 1.87  | 0.81 | 0.93 | 0.42  | -0.60 | 1.43  | 0.42 | 0.75 | LC/MS Neg       | 1361   | 151.04 | 127     | 156-38-7            | C00642  |
| 4-hydroxyphenylpyruvate                             | Amino Acid  | Tyrosine Metabolism                                     | 0.03  | -1.80 | 1.86  | 0.97 | 0.99 | -0.49 | -1.60 | 0.63  | 0.39 | 0.89 | LC/MS Neg       | 1690   | 179.03 | 979     | 156-39-8            | C01179  |
| 4-imidazoleacetate                                  | Amino Acid  | Histidine Metabolism                                    | -0.18 | -1.84 | 1.49  | 0.84 | 0.94 | -0.03 | -1.05 | 0.99  | 0.95 | 0.98 | LC/MS Pos Early | 2055   | 127.05 | 96215   | 645-65-8            | C02835  |
| 4-methyl-2-oxobutanoate                             | Amino Acid  | Leucine, Isoleucine and Valine Metabolism               | 1.63  | 0.19  | 3.06  | 0.03 | 0.26 | 0.97  | 0.10  | 1.85  | 0.03 | 0.26 | LC/MS Neg       | 2170   | 129.06 | 70      | 816-66-0            | C00233  |
| 4-methylbenzenesulfonate                            | Xenobiotics | Chemical                                                | -0.97 | -4.06 | 2.12  | 0.54 | 0.83 | -0.72 | -2.61 | 1.16  | 0.45 | 0.77 | LC/MS Neg       | 2350   | 171.01 | 6101    | 104-15-4            | C06677  |
| 4-methylcatechol sulfate                            | Xenobiotics | Benzoate Metabolism                                     | -1.12 | -1.99 | -0.25 | 0.01 | 0.17 | -0.72 | -1.25 | -0.19 | 0.01 | 0.13 | LC/MS Neg       | 2665   | 203.00 | NA      |                     |         |
| 4-methylguaicol sulfate                             | Xenobiotics | Benzoate Metabolism                                     | -0.61 | -1.45 | 0.22  | 0.15 | 0.49 | -0.46 | -0.97 | 0.05  | 0.07 | 0.41 | LC/MS Neg       | 2978   | 217.02 | NA      | 756760-43-7         |         |
| 4-vinylcatechol sulfate                             | Xenobiotics | Benzoate Metabolism                                     | 0.54  | -0.13 | 1.22  | 0.11 | 0.44 | 0.19  | -0.22 | 0.60  | 0.37 | 0.71 | LC/MS Neg       | 3079.5 | 215.00 | NA      |                     |         |
| 4-vinylphenol sulfate                               | Xenobiotics | Benzoate Metabolism                                     | 1.06  | -0.15 | 2.27  | 0.09 | 0.37 | 0.52  | -0.22 | 1.26  | 0.17 | 0.56 | LC/MS Neg       | 3320   | 199.01 | 6426766 | 2628-17-3           | C05627  |
| 5-(galactosylhydroxy)-L-lysine                      | Amino Acid  | Lysine Metabolism                                       | 3.73  | 0.22  | 7.23  | 0.04 | 0.28 | 1.87  | -0.28 | 0.41  | 0.09 | 0.43 | LC/MS Pos Early | 2755   | 325.16 | NA      | 32448-36-5          |         |
| 5,6-dihydrothymine                                  | Nucleotide  | Pyrimidine Metabolism, Thymine containing               | 1.85  | -1.62 | 5.32  | 0.30 | 0.66 | 0.14  | -1.98 | 2.26  | 0.90 | 0.95 | LC/MS Neg       | 1637.8 | 127.05 | 93556   | 696-04-8            | C00906  |
| 5,6-dihydroxyindole                                 | Nucleotide  | Pyrimidine Metabolism, Uracil containing                | 4.84  | -0.11 | 9.79  | 0.06 | 0.33 | 1.75  | -1.27 | 4.78  | 0.26 | 0.65 | LC/MS Neg       | 1119   | 245.08 | 1119    | 245.08              | 1361384 |
| 5alpha-androstan-3alpha,17beta-diol monosulfate (1) | Lipid       | Androgenic Steroids                                     | 0.62  | -0.49 | 1.73  | 0.27 | 0.62 | 0.46  | -0.21 | 1.14  | 0.18 | 0.57 | LC/MS Neg       | 4925   | 371.19 | NA      |                     |         |
| 5alpha-androstan-3beta,17alpha-diol disulfate       | Lipid       | Androgenic Steroids                                     | -0.10 | -1.03 | 0.83  | 0.84 | 0.94 | 0.05  | -0.52 | 0.62  | 0.86 | 0.94 | LC/MS Neg       | 4215   | 225.07 | NA      |                     |         |
| 5alpha-androstan-3beta,17beta-diol disulfate        | Lipid       | Androgenic Steroids                                     | 0.90  | -0.30 | 2.09  | 0.14 | 0.48 | 0.45  | -0.28 | 1.18  | 0.22 | 0.63 | LC/MS Neg       | 3880   | 225.07 | 242332  | 571-20-0            | C12525  |
| 5alpha-androstan-3beta,17beta-diol monosulfate (2)  | Lipid       | Androgenic Steroids                                     | 0.52  | -0.54 | 1.59  | 0.33 | 0.69 | 0.28  | -0.37 | 0.93  | 0.40 | 0.74 | LC/MS Neg       | 4685   | 371.19 | NA      |                     |         |
| 5alpha-pregnan-3beta,20alpha-diol disulfate         | Lipid       | Progestin Steroids                                      | -0.25 | -1.38 | 0.89  | 0.67 | 0.89 | -0.20 | -0.89 | 0.50  | 0.57 | 0.83 | LC/MS Neg       | 3962   | 239.09 | NA      |                     |         |
| 5alpha-pregnan-3beta,20alpha-diol monosulfate (2)   | Lipid       | Progestin Steroids                                      | -0.07 | -1.09 | 0.95  | 0.89 | 0.96 | -0.12 | -0.74 | 0.50  | 0.70 | 0.88 | LC/MS Neg       | 5060   | 399.22 | NA      |                     |         |
| 5alpha-pregnan-3beta,20beta-diol monosulfate (1)    | Lipid       | Progestin Steroids                                      | 0.01  | -1.08 | 1.11  | 0.98 | 0.99 | 0.01  | -0.65 | 0.68  | 0.97 | 0.98 | LC/MS Neg       | 5180   | 399.22 | NA      |                     |         |
| 5alpha-pregnan-diol disulfate                       | Lipid       | Progestin Steroids                                      | 0.04  | -0.87 | 0.96  | 0.92 | 0.97 | 0.12  | -0.43 | 0.68  | 0.66 | 0.87 | LC/MS Neg       | 4310   | 239.09 | 5127902 |                     |         |
| 5-dodecenolate (12:1n7)                             | Lipid       | Medium Chain Fatty Acid                                 | 2.12  | 0.50  | 3.74  | 0.01 | 0.17 | 1.27  | 0.28  | 2.26  | 0.01 | 0.17 | LC/MS Neg       | 5224   | 197.15 | 5312378 | 2430-94-6           |         |
| 5-dodecenoyl carnitine (C12:1)                      | Lipid       | Fatty Acid Metabolism (Acyl Carnitine, Monounsaturated) | 2.00  | 0.75  | 3.26  | 0.00 | 0.09 | 1.54  | 0.78  | 2.30  | 0.00 | 0.01 | LC/MS Pos Late  | 1135   | 342.26 | NA      |                     |         |
| 5-HEPE                                              | Lipid       | Eicosanoid                                              | -0.39 | -1.33 | 0.54  | 0.41 | 0.72 | -0.37 | -0.94 | 0.20  | 0.20 | 0.59 | LC/MS Neg       | 5316   | 317.21 | 6439678 | 83952-40-3          |         |
| 5-HETE                                              | Lipid       | Eicosanoid                                              | -0.71 | -1.80 | 0.39  | 0.21 | 0.55 | -0.41 | -1.07 | 0.26  | 0.23 | 0.63 | LC/MS Neg       | 5382   | 319.23 | 5280733 | 73307-52-5          | C04805  |
| 5-HETE                                              | Lipid       | Eicosanoid                                              | -0.58 | -1.54 | 0.38  | 0.24 | 0.58 | -0.36 | -0.95 | 0.22  | 0.22 | 0.62 | LC/MS Neg       | 5444   | 321.24 | 5283143 | 88053-46-7          |         |
| 5-hydroxyhexanoate                                  | Lipid       | Fatty Acid, Monohydroxy                                 | 0.56  | -0.61 | 1.73  | 0.35 | 0.69 | 0.14  | -0.57 | 0.85  | 0.70 | 0.88 | LC/MS Neg       | 1267   | 131.07 | 170748  | 44843-89-2          |         |
| 5-hydroxylysine                                     | Amino Acid  | Lysine Metabolism                                       | 1.78  | -0.64 | 4.19  | 0.15 | 0.49 | 0.58  | -0.90 | 2.06  | 0.44 | 0.77 | LC/MS Pos Early | 2790   | 163.11 | 1029    | 13204-98-3          | C16741  |
| 5-methylthioadenosine (MTA)                         | Amino Acid  | Polyamine Metabolism                                    | 2.22  | 0.25  | 4.20  | 0.03 | 0.26 | 0.82  | -0.39 |       |      |      |                 |        |        |         |                     |         |

|                                            |                        |                                                         |       |       |       |      |      |       |       |       |      |      |                 |        |        |          |                     |        |
|--------------------------------------------|------------------------|---------------------------------------------------------|-------|-------|-------|------|------|-------|-------|-------|------|------|-----------------|--------|--------|----------|---------------------|--------|
| cysteine                                   | Amino Acid             | Methionine, Cysteine, SAM and Taurine Metabolism        | 2.15  | -0.71 | 5.00  | 0.14 | 0.48 | 2.14  | 0.40  | 3.87  | 0.02 | 0.20 | LC/MS Pos Early | 1475   | 122.03 | 5862     | 52-90-4:56-89-3     | C00097 |
| cysteine s-sulfate                         | Amino Acid             | Methionine, Cysteine, SAM and Taurine Metabolism        | -3.81 | -7.46 | -0.15 | 0.04 | 0.29 | -1.70 | -3.93 | 0.54  | 0.14 | 0.52 | LC/MS Pos Early | 565    | 201.98 | 115015   | 1637-71-4           | C05824 |
| cysteine sulfonic acid                     | Amino Acid             | Methionine, Cysteine, SAM and Taurine Metabolism        | -1.65 | -4.16 | 0.87  | 0.20 | 0.55 | -0.39 | -1.93 | 1.15  | 0.62 | 0.85 | LC/MS Pos Early | 597    | 154.02 | 109      | 207121-48-0         | C00606 |
| cysteine-glutathione disulfide             | Amino Acid             | Glutathione Metabolism                                  | -0.64 | -2.04 | 0.75  | 0.37 | 0.71 | -0.61 | -1.46 | 0.24  | 0.16 | 0.55 | LC/MS Pos Early | 2465   | 427.10 | 4247235  | 13081-14-6          |        |
| cysteinylglycine disulfide*                | Amino Acid             | Glutathione Metabolism                                  | 1.99  | -1.13 | 5.11  | 0.21 | 0.56 | 0.76  | -1.14 | 2.66  | 0.43 | 0.76 | LC/MS Pos Early | 2547   | 298.05 | NA       | 70555-24-7          |        |
| cystine                                    | Amino Acid             | Methionine, Cysteine, SAM and Taurine Metabolism        | 0.98  | -2.70 | 4.66  | 0.60 | 0.66 | 1.54  | -0.70 | 3.78  | 0.18 | 0.57 | LC/MS Pos Early | 2000   | 241.03 | 67678    | 56-89-3             | C00491 |
| decadienedioic acid (C10:2-DC)**           | Lipid                  | Fatty Acid, Dicarboxylate                               | 0.60  | -0.63 | 1.84  | 0.34 | 0.69 | 0.57  | -0.18 | 1.32  | 0.14 | 0.52 | LC/MS Neg       | 1290   | 197.08 | NA       |                     |        |
| decanoylcarnitine (C10)                    | Lipid                  | Fatty Acid Metabolism (Acyl Carnitine, Medium Chain)    | 1.60  | 0.36  | 2.84  | 0.01 | 1.47 | 1.46  | 0.72  | 2.21  | 0.00 | 0.01 | LC/MS Pos Late  | 1130   | 316.25 | 10245190 | 1492-27-9           |        |
| dehydroepiandrosterone sulfate (DHEA-S)    | Lipid                  | Androgenic Steroids                                     | 1.33  | -0.70 | 3.36  | 0.20 | 0.55 | 0.61  | -0.63 | 1.85  | 0.33 | 0.69 | LC/MS Neg       | 4745   | 367.16 | 12594    | 651-48-9            | C04555 |
| delta-CEHC                                 | Cofactors and Vitamins | Tocopherol Metabolism                                   | 1.04  | -0.11 | 2.19  | 0.08 | 0.36 | 0.39  | -0.31 | 1.09  | 0.28 | 0.65 | LC/MS Neg       | 3422   | 249.11 | 11536125 | 84599-16-6          |        |
| deoxycarnitine                             | Lipid                  | Carnitine Metabolism                                    | 2.64  | -1.47 | 6.74  | 0.21 | 0.55 | 1.03  | -1.48 | 3.53  | 0.42 | 0.75 | LC/MS Pos Early | 2052   | 146.12 | 134      | 6249-56-5           | C01181 |
| deoxycholate                               | Lipid                  | Secondary Bile Acid Metabolism                          | 0.18  | -0.74 | 1.09  | 0.71 | 0.91 | 0.18  | -0.38 | 0.74  | 0.52 | 0.82 | LC/MS Neg       | 5294   | 391.29 | 222528   | 83-44-3             | C04483 |
| deoxycholic acid (12 or 24)-sulfate*       | Lipid                  | Secondary Bile Acid Metabolism                          | -0.34 | -1.11 | 0.42  | 0.38 | 0.71 | -0.12 | -0.58 | 0.35  | 0.63 | 0.85 | LC/MS Neg       | 4598   | 235.12 | NA       |                     |        |
| deoxycholic acid glucuronide               | Lipid                  | Secondary Bile Acid Metabolism                          | 0.72  | -0.01 | 1.45  | 0.05 | 0.33 | 0.37  | -0.08 | 0.82  | 0.10 | 0.46 | LC/MS Neg       | 4819   | 567.32 | NA       |                     |        |
| dihomolinoleate (20:2n6)                   | Lipid                  | Long Chain Polyunsaturated Fatty Acid (n3 and n6)       | 2.37  | 0.39  | 4.35  | 0.02 | 0.22 | 1.75  | 0.55  | 2.96  | 0.00 | 0.10 | LC/MS Neg       | 5730   | 307.26 | 6439848  | 2091-39-6           | C16525 |
| dihomolinolenate (20:3n3 or 3n6)           | Lipid                  | Long Chain Polyunsaturated Fatty Acid (n3 and n6)       | 3.66  | 1.17  | 6.14  | 0.00 | 0.11 | 2.95  | 1.44  | 4.45  | 0.00 | 0.01 | LC/MS Neg       | 5596   | 305.25 | 5280581  | 1706-64-5           | C03242 |
| dihomo-linolenoylcarnitine (C20:3n3 or 6)* | Lipid                  | Fatty Acid Metabolism (Acyl Carnitine, Polyunsaturated) | 1.83  | -0.06 | 3.72  | 0.06 | 0.33 | 0.98  | -0.17 | 2.13  | 0.10 | 0.44 | LC/MS Pos Late  | 1392   | 450.36 | NA       |                     |        |
| dihomo-linolenoyl-choline                  | Lipid                  | Fatty Acid Metabolism (Acyl Choline)                    | 0.20  | -1.18 | 1.59  | 0.77 | 0.92 | 0.20  | -0.65 | 1.04  | 0.65 | 0.87 | LC/MS Pos Late  | 1424   | 392.35 | NA       |                     |        |
| dihomo-linoleoylcarnitine (C20:2)*         | Lipid                  | Fatty Acid Metabolism (Acyl Carnitine, Polyunsaturated) | 1.61  | -0.12 | 3.34  | 0.07 | 0.36 | 0.87  | -0.18 | 1.93  | 0.11 | 0.46 | LC/MS Pos Late  | 1436   | 452.37 | NA       |                     |        |
| dihydrocaffeate sulfate (2)                | Xenobiotics            | Food Component/Plant                                    | -0.26 | -1.08 | 0.56  | 0.53 | 0.03 | 0.02  | -0.48 | 0.52  | 0.93 | 0.97 | LC/MS Polar     | 1328   | 261.01 | NA       |                     |        |
| dihydroferulate                            | Xenobiotics            | Food Component/Plant                                    | -0.38 | -1.25 | 0.50  | 0.40 | 0.71 | 0.10  | -0.44 | 0.63  | 0.72 | 0.89 | LC/MS Neg       | 1928   | 195.07 | 14340    | 1135-23-5           |        |
| dihydroorotate                             | Nucleotide             | Pyrimidine Metabolism, Orotate containing               | 1.32  | 0.34  | 2.30  | 0.01 | 0.16 | 0.62  | 0.02  | 1.22  | 0.04 | 0.30 | LC/MS Polar     | 1910   | 157.03 | 648      | 155-54-4            | C00337 |
| dimethylarginine (ADMA + SDMA)             | Amino Acid             | Urea cycle, Arginine and Proline Metabolism             | 4.42  | -2.42 | 11.25 | 0.20 | 0.55 | 1.64  | -2.53 | 5.81  | 0.44 | 0.76 | LC/MS Pos Early | 2850   | 203.15 | 123831   | 102783-24-4         | C03626 |
| dimethylglycine                            | Amino Acid             | Glycine, Serine and Threonine Metabolism                | 2.70  | -0.63 | 6.02  | 0.11 | 0.43 | -0.04 | -2.08 | 1.99  | 0.97 | 0.99 | LC/MS Pos Early | 1104   | 104.07 | 673      | 1118-68-9           | C01026 |
| docosadienoate (22:2n6)                    | Lipid                  | Long Chain Polyunsaturated Fatty Acid (n3 and n6)       | 1.03  | -0.78 | 2.82  | 0.26 | 0.61 | 0.62  | -0.47 | 1.72  | 0.26 | 0.65 | LC/MS Neg       | 6034   | 335.30 | 5282807  | 7370-49-2           | C16533 |
| docosadiolate (C22-DC)                     | Lipid                  | Fatty Acid, Dicarboxylate                               | -0.66 | -1.79 | 0.47  | 0.25 | 0.60 | -1.32 | -1.01 | 0.37  | 0.37 | 0.71 | LC/MS Neg       | 5291.8 | 369.30 | 244872   | 605-56-6            | C19625 |
| docosahexaenoate (DHA; 22:6n3)             | Lipid                  | Long Chain Polyunsaturated Fatty Acid (n3 and n6)       | 1.25  | -1.16 | 3.65  | 0.31 | 0.67 | 1.10  | -0.34 | 2.59  | 0.13 | 0.52 | LC/MS Neg       | 5525   | 327.23 | 445580   | 6217-54-5           | C06429 |
| docosahexaenoylcholine                     | Lipid                  | Fatty Acid Metabolism (Acyl Choline)                    | -0.85 | -2.20 | 0.51  | 0.22 | 0.57 | -1.07 | -0.99 | 0.66  | 0.69 | 0.88 | LC/MS Pos Late  | 1378   | 414.34 | NA       |                     |        |
| docosapentaenoate (DPA; 22:5n3)            | Lipid                  | Long Chain Polyunsaturated Fatty Acid (n3 and n6)       | 2.32  | 0.49  | 4.16  | 0.01 | 0.19 | 1.51  | 0.39  | 2.63  | 0.01 | 0.13 | LC/MS Neg       | 5571   | 329.25 | 6441454  | 2234-74-4           | C16513 |
| docosapentaenoate (n6 DPA; 22:5n6)         | Lipid                  | Long Chain Polyunsaturated Fatty Acid (n3 and n6)       | 1.78  | -0.27 | 3.83  | 0.09 | 0.38 | 1.41  | 0.16  | 2.66  | 0.03 | 0.24 | LC/MS Neg       | 5624.5 | 329.25 | 6441454  | 25182-74-5          | C16513 |
| docosatrienoate (22:3n3)                   | Lipid                  | Long Chain Polyunsaturated Fatty Acid (n3 and n6)       | 2.03  | 0.66  | 3.40  | 0.00 | 0.11 | 1.14  | 0.31  | 1.98  | 0.01 | 0.13 | LC/MS Neg       | 5823   | 333.28 | 5312556  | 59708-86-0          | C16534 |
| dodecadienoate (12:2)*                     | Lipid                  | Fatty Acid, Dicarboxylate                               | 2.73  | 0.68  | 4.77  | 0.01 | 0.16 | 1.38  | 0.13  | 2.63  | 0.03 | 0.26 | LC/MS Neg       | 5146   | 195.14 | NA       |                     |        |
| dodecanedioate (C12)                       | Lipid                  | Fatty Acid, Dicarboxylate                               | 1.81  | 0.13  | 3.49  | 0.03 | 0.27 | 1.18  | 0.15  | 2.20  | 0.02 | 0.23 | LC/MS Neg       | 2990   | 229.14 | 12736    | 693-23-2            | C02678 |
| dodecenedioate (C12:1-DC)*                 | Lipid                  | Fatty Acid, Dicarboxylate                               | 0.62  | -0.59 | 1.82  | 0.31 | 0.68 | 0.81  | 0.07  | 1.54  | 0.03 | 0.26 | LC/MS Neg       | 2700   | 227.13 | NA       |                     |        |
| dopamine 3-O-sulfate                       | Amino Acid             | Tyrosine Metabolism                                     | -0.12 | -2.08 | 1.85  | 0.91 | 0.96 | 0.17  | -1.03 | 1.37  | 0.78 | 0.91 | LC/MS Neg       | 1556.2 | 232.03 | 122136   |                     | C13690 |
| DSGEGDFXAEAGGVR*                           | Peptide                | Fibrinogen Cleavage Peptide                             | 0.64  | -0.44 | 1.73  | 0.25 | 0.59 | 0.07  | -0.60 | 0.73  | 0.84 | 0.93 | LC/MS Neg       | 2535   | 731.32 | NA       |                     |        |
| eicosanedioate (C20-DC)                    | Lipid                  | Fatty Acid, Dicarboxylate                               | -0.52 | -2.50 | 1.46  | 0.60 | 0.86 | 0.01  | -1.20 | 1.21  | 0.99 | 0.99 | LC/MS Neg       | 5200.9 | 341.27 | 75502    | 2424-92-2           |        |
| eicosapentaenoate (EPA; 20:5n3)            | Lipid                  | Long Chain Polyunsaturated Fatty Acid (n3 and n6)       | 1.03  | -0.70 | 2.76  | 0.24 | 0.58 | 0.24  | -0.82 | 1.29  | 0.66 | 0.87 | LC/MS Neg       | 5450   | 301.22 | 446284   | 10-2005-9;10417-94- | C06428 |
| eicosenoate (20:1n9 or 1n11)               | Lipid                  | Long Chain Monounsaturated Fatty Acid                   | -0.06 | -1.66 | 1.53  | 0.94 | 0.97 | 0.29  | -0.69 | 1.26  | 0.56 | 0.83 | LC/MS Neg       | 5950   | 309.28 | 5282768  |                     | C16526 |
| eicosenoylcarnitine (C20:1)*               | Lipid                  | Fatty Acid Metabolism (Acyl Carnitine, Monounsaturated) | -1.91 | -3.52 | -0.29 | 0.02 | 0.23 | -1.15 | -2.14 | -0.17 | 0.02 | 0.23 | LC/MS Pos Late  | 1484   | 454.39 | NA       |                     |        |
| epiandrosterone sulfate                    | Lipid                  | Androgenic Steroids                                     | 0.10  | -1.22 | 1.42  | 0.88 | 0.96 | 0.10  | -0.71 | 0.90  | 0.81 | 0.92 | LC/MS Neg       | 4855   | 369.17 | 9929317  | 22229-22-7          |        |
| ergothioneine                              | Xenobiotics            | Food Component/Plant                                    | 1.00  | -0.24 | 2.23  | 0.11 | 0.44 | 0.19  | -0.57 | 0.95  | 0.62 | 0.85 | LC/MS Pos Early | 850    | 230.10 | 3032311  | 58511-63-0          | C05570 |
| erucate (22:1n9)                           | Lipid                  | Long Chain Monounsaturated Fatty Acid                   | -1.38 | -2.61 | -0.14 | 0.03 | 0.26 | -0.84 | -1.60 | -0.09 | 0.03 | 0.26 | LC/MS Neg       | 6355.6 | 337.31 | 5281116  | 112-86-7            | C08316 |
| erythritol                                 | Xenobiotics            | Food Component/Plant                                    | 0.00  | -2.44 | 2.45  | 1.00 | 1.00 | 0.74  | -0.75 | 2.23  | 0.33 | 0.69 | LC/MS Polar     | 1491   | 167.06 | 222285   | 149-32-6            | C00503 |
| erythronate*                               | Carbohydrate           | Aminosugar Metabolism                                   | 3.35  | -1.45 | 8.15  | 0.17 | 0.52 | 1.60  | -1.33 | 4.53  | 0.28 | 0.65 | LC/MS Polar     | 2186   | 135.03 | 2781043  | 88759-55-1          |        |
| ethyl-alpha-glucopyranose                  | Xenobiotics            | Food Component/Plant                                    | -1.50 | -5.55 | 2.54  | 0.47 | 0.77 | -1.37 | -3.83 | 1.10  | 0.28 | 0.65 | LC/MS Pos Early | 1189   | 226.13 | NA       |                     |        |
| ethyl-beta-glucopyranoside                 | Xenobiotics            | Food Component/Plant                                    | 0.56  | -0.24 | 1.37  | 0.17 | 0.52 | 0.30  | -0.20 | 0.79  | 0.24 | 0.64 | LC/MS Neg       | 1578   | 207.09 | NA       |                     |        |
| ethylmalonate                              | Amino Acid             | Leucine, Isoleucine and Valine Metabolism               | 0.63  | -1.50 | 2.77  | 0.56 | 0.84 | 0.80  | -0.50 | 2.10  | 0.23 | 0.63 | LC/MS Polar     | 2785   | 131.03 | 11756    | 601-75-2            |        |
| etiocolanalone glucuronide                 | Lipid                  | Androgenic Steroids                                     | 0.21  | -1.27 | 1.70  | 0.78 | 0.92 | -0.14 | -1.05 | 0.76  | 0.76 | 0.90 | LC/MS Neg       | 4915   | 465.25 | 270605   |                     | 621890 |
| eugenol sulfate                            | Xenobiotics            | Food Component/Plant                                    | 0.50  | -0.18 | 1.19  | 0.15 | 0.49 | 0.21  | -0.21 | 0.63  | 0.32 | 0.69 | LC/MS Neg       | 3782   | 243.03 | 180632   | 95480-60-7          |        |
| Fibrinopeptide A (2-15)                    | Peptide                | Fibrinogen Cleavage Peptide                             | 0.41  | -1.07 | 1.89  | 0.59 | 0.85 | -0.11 | -1.01 | 0.80  | 0.82 | 0.93 | LC/MS Neg       | 2120   | 653.27 | NA       |                     |        |
| Fibrinopeptide A (3-15)                    | Peptide                | Fibrinogen Cleavage Peptide                             | 0.48  | -0.80 | 1.76  | 0.46 | 0.77 | 0.25  | -0.53 | 1.03  | 0.53 | 0.82 | LC/MS Neg       | 2419   | 595.75 | NA       |                     |        |
| Fibrinopeptide A (4-15)                    | Peptide                | Fibrinogen Cleavage Peptide                             | -0.03 | -1.17 | 1.10  | 0.95 | 0.98 | 0.05  | -0.64 | 0.74  | 0.89 | 0.95 | LC/MS Neg       | 2570   | 552.24 | NA       |                     |        |
| Fibrinopeptide B (1-11)                    | Peptide                | Fibrinogen Cleavage Peptide                             | 0.19  | -0.87 | 1.25  | 0.73 | 0.91 | -0.32 | -0.97 | 0.32  | 0.33 | 0.69 | LC/MS Pos Early | 3071   | 617.95 | NA       |                     |        |
| Fibrinopeptide B (1-12)                    | Peptide                | Fibrinogen Cleavage Peptide                             | 0.32  | -0.65 | 1.29  | 0.52 | 0.82 | -0.05 | -0.65 | 0.54  | 0.86 | 0.94 | LC/MS Neg       | 2366   | 661.25 | NA       |                     |        |
| Fibrinopeptide B (1-13)                    | Peptide                | Fibrinogen Cleavage Peptide                             | -0.05 | -0.62 | 0.52  | 0.86 | 0.95 | -0.17 | -0.51 | 0.18  | 0.35 | 0.70 | LC/MS Neg       | 2482   | 696.77 | NA       |                     |        |
| Fibrinopeptide B (1-9)                     | Peptide                | Fibrinogen Cleavage Peptide                             | 0.15  | -1.73 | 2.03  | 0.87 | 0.95 | -0.14 | -1.29 | 1.01  | 0.81 | 0.92 | LC/MS Neg       | 905    | 314.44 | NA       |                     |        |
| forminoglutamate                           | Amino Acid             | Histidine Metabolism                                    | 1.46  | -0.43 | 3.35  | 0.13 | 0.46 | 0.32  | -0.83 | 1.48  | 0.58 | 0.83 | LC/MS Pos Early | 1880   | 175.07 | 439233   | 816-90-0            | C00439 |
| fructose                                   | Carbohydrate           | Fructose, Mannose and Galactose Metabolism              | -1.68 | -3.98 | 0.62  | 0.15 | 0.49 | -0.09 | -1.49 | 1.32  | 0.90 | 0.95 | LC/MS Polar     | 2655   | 225.06 | 5984     | 57-48-7             | C00095 |
| fumarate                                   | Energy                 | TCA Cycle                                               | 1.60  | -1.40 | 4.60  | 0.30 | 0.66 | 1.46  | -0.37 | 3.29  | 0.12 | 0.48 | LC/MS Polar     | 3084   | 115.00 | 444972   | 100-17-8            | C00122 |
| gamma-CEHC                                 | Cofactors and Vitamins | Tocopherol Metabolism                                   | 1.18  | -0.17 | 2.52  | 0.09 | 0.37 | 0.46  | -0.36 | 1.28  | 0.27 | 0.65 | LC/MS Neg       | 3843   | 263.13 | 133098   | 178167-74-4         |        |
| gamma-CEHC glucuronide*                    | Cofactors and Vitamins | Tocopherol Metabolism                                   | 0.98  | -0.35 | 2.32  | 0.15 | 0.49 | 0.55  | -0.26 | 1.37  | 0.18 | 0.57 | LC/MS Neg       | 2500   | 439.16 | NA       |                     |        |
| gamma-glutamyl-2-aminobutyrate             | Peptide                | Gamma-glutamyl Amino Acid                               | 0.62  | -0.35 | 1.58  | 0.21 | 0.56 | 0.64  | 0.06  | 1.23  | 0.03 | 0.26 | LC/MS Pos Early | 2380   | 233.11 | NA       | 16869-42-4          |        |
| gamma-glutamylalanine                      | Peptide                | Gamma-glutamyl Amino Acid                               | 0.37  | -0.92 | 1.66  | 0.58 | 0.84 | 0.86  | 0.08  | 1.64  | 0.03 | 0.26 | LC/MS Pos Early | 1986   | 219.10 | 440103   | 5875-41-2           |        |
| gamma-glutamyl-alpha-lysine                | Peptide                | Gamma-glutamyl Amino Acid                               | 0.45  | -1.56 | 2.45  | 0.66 | 0.88 | 0.91  | -0.31 | 2.13  | 0.14 | 0.53 | LC/MS Pos Early | 2784   | 276.16 | 65254    |                     |        |
| gamma-glutamylcitulline*                   | Peptide                | Gamma-glutamyl Amino Acid                               | 0.60  | -0.80 | 2.00  | 0.40 | 0.71 | 0.65  | -0.20 | 1.50  | 0.14 | 0.52 | LC/MS Pos Early | 1644   | 305.15 | NA       |                     |        |
| gamma-glutamyl-epsilon-lysine              | Peptide                | Gamma-glutamyl Amino Acid                               | 0.29  | -1.18 | 1.76  | 0.70 | 0.90 | 0.47  | -0.42 | 1.37  |      |      |                 |        |        |          |                     |        |

|                                                |                                   |                                                              |       |       |       |      |      |       |       |       |      |      |                 |        |        |    |          |                     |
|------------------------------------------------|-----------------------------------|--------------------------------------------------------------|-------|-------|-------|------|------|-------|-------|-------|------|------|-----------------|--------|--------|----|----------|---------------------|
| linoleoylcholine*                              | Lipid                             | Fatty Acid Metabolism (Acyl Choline)                         | -0.59 | -2.46 | 1.29  | 0.54 | 0.83 | -0.11 | -1.25 | 1.04  | 0.85 | 0.94 | LC/MS Pos Late  | 1388   | 366.34 | NA |          |                     |
| lysine                                         | Amino Acid                        | Lysine Metabolism                                            | 3.09  | -3.15 | 9.33  | 0.33 | 0.68 | 1.08  | -2.73 | 4.89  | 0.58 | 0.83 | LC/MS Pos Early | 2850   | 147.11 |    | 5962     | 56-87-1             |
| malate                                         | Energy                            | TCA Cycle                                                    | 1.22  | -1.64 | 4.08  | 0.40 | 0.72 | 1.41  | -0.33 | 3.16  | 0.11 | 0.47 | LC/MS Neg       | 615.6  | 133.01 |    | 525      | 6915-15-7           |
| maleate                                        | Lipid                             | Fatty Acid, Dicarboxylate                                    | 1.16  | -1.70 | 4.02  | 0.43 | 0.74 | 1.56  | -0.18 | 3.29  | 0.08 | 0.42 | LC/MS Polar     | 2640   | 115.00 |    | 444266   | 110-16-7            |
| malonate                                       | Lipid                             | Fatty Acid Synthesis                                         | 0.30  | -0.88 | 1.48  | 0.62 | 0.87 | 0.45  | -0.27 | 1.17  | 0.22 | 0.62 | LC/MS Polar     | 3447   | 103.00 |    | 867      | 141-82-2;26522-22-8 |
| maltose                                        | Carbohydrate                      | Glycogen Metabolism                                          | -0.54 | -2.38 | 1.29  | 0.56 | 0.84 | -0.19 | -1.31 | 0.92  | 0.73 | 0.89 | LC/MS Polar     | 3329.4 | 387.11 |    | 10991489 | 6363-53-7           |
| mannitol/sorbitol                              | Carbohydrate                      | Fructose, Mannose and Galactose Metabolism                   | 0.07  | -1.43 | 1.56  | 0.93 | 0.97 | 0.67  | -0.24 | 1.58  | 0.15 | 0.54 | LC/MS Polar     | 2320   | 181.07 |    | 5780     |                     |
| mannose                                        | Carbohydrate                      | Fructose, Mannose and Galactose Metabolism                   | 1.63  | -1.89 | 5.16  | 0.36 | 0.71 | 1.17  | -0.98 | 3.32  | 0.29 | 0.65 | LC/MS Polar     | 2200   | 225.06 |    | 18950    | 3458-28-4           |
| margarate (17:0)                               | Lipid                             | Long Chain Saturated Fatty Acid                              | 2.43  | -0.37 | 5.22  | 0.09 | 0.38 | 1.91  | 0.20  | 3.61  | 0.03 | 0.26 | LC/MS Neg       | 5731   | 269.25 |    | 10465    | 506-12-7            |
| metabolonic lactone sulfate                    | Partially Characterized Molecules | Partially Characterized Molecules                            | 1.14  | -0.22 | 2.49  | 0.10 | 0.40 | 0.91  | 0.08  | 1.73  | 0.03 | 0.26 | LC/MS Neg       | 4800   | 427.21 | NA |          |                     |
| methionine                                     | Amino Acid                        | Methionine, Cysteine, SAM and Taurine Metabolism             | 3.37  | -1.74 | 8.48  | 0.20 | 0.55 | 2.69  | -0.42 | 5.81  | 0.09 | 0.43 | LC/MS Pos Early | 2526   | 150.06 |    | 6137     | 63-68-3             |
| methionine sulfone                             | Amino Acid                        | Methionine, Cysteine, SAM and Taurine Metabolism             | 0.45  | -1.74 | 2.65  | 0.68 | 0.89 | -0.77 | -2.11 | 0.56  | 0.26 | 0.65 | LC/MS Pos Early | 1250   | 182.05 |    | 69961    | 820-10-0            |
| methionine sulfoxide                           | Amino Acid                        | Methionine, Cysteine, SAM and Taurine Metabolism             | -1.44 | -3.92 | 1.05  | 0.26 | 0.60 | -0.95 | -2.47 | 0.56  | 0.22 | 0.62 | LC/MS Pos Early | 1272   | 166.05 |    | 158980   | 3226-65-1           |
| methyl glucopyranoside (alpha + beta)          | Xenobiotics                       | Food Component/Plant                                         | 0.97  | -0.31 | 2.24  | 0.14 | 0.47 | 0.15  | -0.63 | 0.92  | 0.71 | 0.89 | LC/MS Neg       | 1070   | 193.07 | NA |          |                     |
| methyl-4-hydroxybenzoate sulfate               | Xenobiotics                       | Benzoate Metabolism                                          | -0.34 | -1.01 | 0.33  | 0.32 | 0.68 | -0.13 | -0.54 | 0.28  | 0.54 | 0.82 | LC/MS Neg       | 2873   | 231.00 | NA |          |                     |
| methylnaphthyl sulfate (2)*                    | Xenobiotics                       | Chemical                                                     | 0.33  | -0.35 | 1.00  | 0.34 | 0.69 | -0.07 | -0.48 | 0.35  | 0.75 | 0.90 | LC/MS Neg       | 4163   | 237.02 | NA |          |                     |
| methylsuccinate                                | Amino Acid                        | Leucine, Isoleucine and Valine Metabolism                    | 0.37  | -2.40 | 3.15  | 0.79 | 0.92 | 0.87  | -0.82 | 2.56  | 0.31 | 0.68 | LC/MS Polar     | 2800   | 131.03 |    | 10349    | 498-21-5            |
| myo-inositol                                   | Lipid                             | Inositol Metabolism                                          | 1.30  | -0.65 | 3.26  | 0.19 | 0.54 | 0.50  | -0.70 | 1.69  | 0.41 | 0.74 | LC/MS Polar     | 3506.3 | 225.06 |    | 892      | 87-89-8             |
| myristate (14:0)                               | Lipid                             | Long Chain Saturated Fatty Acid                              | 4.55  | 1.60  | 7.50  | 0.00 | 0.10 | 2.84  | 1.04  | 4.64  | 0.00 | 0.07 | LC/MS Neg       | 5440   | 227.20 |    | 11005    | 544-63-8            |
| myristoleate (14:1n5)                          | Lipid                             | Long Chain Monounsaturated Fatty Acid                        | 2.51  | 0.72  | 4.30  | 0.01 | 0.13 | 4.43  | 0.34  | 2.52  | 0.01 | 0.15 | LC/MS Neg       | 5346.9 | 225.19 |    | 5281119  | 544-64-9            |
| myristoleoylcarnitine (C14:1)*                 | Lipid                             | Fatty Acid Metabolism (Acyl Carnitine, Monounsaturated)      | 1.77  | 0.29  | 3.25  | 0.02 | 0.22 | 1.30  | 0.40  | 2.20  | 0.00 | 0.10 | LC/MS Pos Late  | 1316   | 370.29 |    | 90659872 | 889848-55-9         |
| myristoyl dihydrospingomyelin (d18:0/14:0)*    | Lipid                             | Dihydrospingomyelins                                         | 1.61  | -1.01 | 4.22  | 0.23 | 0.58 | 1.23  | -0.37 | 2.83  | 0.13 | 0.51 | LC/MS Pos Late  | 2060   | 677.56 | NA |          |                     |
| myristoylcarnitine (C14)                       | Lipid                             | Fatty Acid Metabolism (Acyl Carnitine, Long Chain Saturated) | 2.88  | 1.22  | 4.55  | 0.00 | 0.06 | 2.13  | 1.13  | 3.14  | 0.00 | 0.01 | LC/MS Pos Late  | 1350   | 372.31 |    | 6428654  | 18822-89-4          |
| myristoyl-2-dimethyllysine                     | Amino Acid                        | Lysine Metabolism                                            | -0.74 | -2.45 | 0.97  | 0.39 | 0.71 | -0.73 | -1.77 | 0.34  | 0.17 | 0.56 | LC/MS Pos Early | 2833   | 175.14 | NA |          |                     |
| N,N,N-trimethyl-5-aminovallate                 | Amino Acid                        | Lysine Metabolism                                            | 1.29  | -0.94 | 3.51  | 0.26 | 0.61 | -0.39 | -1.75 | 0.98  | 0.58 | 0.83 | LC/MS Pos Early | 2186   | 160.13 | NA |          |                     |
| N,N,N-trimethyl-L-alanylproline betaine (TMAP) | Amino Acid                        | Urea cycle, Arginine and Proline Metabolism                  | 6.69  | 1.87  | 11.51 | 0.01 | 0.14 | 3.14  | 0.19  | 6.09  | 0.04 | 0.28 | LC/MS Pos Early | 2344   | 229.15 | NA |          |                     |
| N,N-dimethylalanine                            | Amino Acid                        | Alanine and Aspartate Metabolism                             | 0.31  | -1.12 | 1.74  | 0.67 | 0.89 | -0.43 | -1.30 | 0.44  | 0.33 | 0.69 | LC/MS Pos Early | 1378   | 118.09 | NA |          |                     |
| N,N-dimethyl-pro-pro                           | Peptide                           | Modified Peptides                                            | 9.19  | 3.47  | 14.91 | 0.00 | 0.08 | 2.57  | -0.96 | 6.09  | 0.15 | 0.54 | LC/MS Pos Early | 2402   | 241.15 | NA |          |                     |
| N1-Methyl-2-pyrindone-3-carboxamide            | Cofactors and Vitamins            | Nicotinate and Nicotinamide Metabolism                       | 1.40  | -0.30 | 3.11  | 0.11 | 0.42 | 0.19  | -0.85 | 1.23  | 0.72 | 0.89 | LC/MS Pos Early | 1250   | 153.07 |    | 69698    | 701-44-0            |
| N1-Methyl-4-pyrindone-3-carboxamide            | Cofactors and Vitamins            | Nicotinate and Nicotinamide Metabolism                       | 0.56  | -0.82 | 1.94  | 0.42 | 0.74 | 0.12  | -0.72 | 0.97  | 0.77 | 0.91 | LC/MS Pos Early | 1260   | 153.07 |    | 440810   | 769-49-3            |
| N1-methylinosine                               | Nucleotide                        | Purine Metabolism, (Hypo)Xanthine/Inosine containing         | 3.39  | -0.12 | 6.91  | 0.06 | 0.33 | 0.68  | -1.47 | 2.83  | 0.53 | 0.82 | LC/MS Pos Early | 1430   | 283.10 |    | 65095    | 20245-33-4          |
| N2,N2-dimethylguanosine                        | Nucleotide                        | Purine Metabolism, Guanine containing                        | 9.40  | 4.74  | 14.06 | 0.00 | 0.05 | 3.65  | 0.78  | 6.52  | 0.01 | 0.17 | LC/MS Pos Early | 2210   | 312.13 |    | 92919    | 2140-67-2           |
| N2,N5-diacetylornithine                        | Amino Acid                        | Urea cycle, Arginine and Proline Metabolism                  | 0.59  | -0.93 | 2.10  | 0.44 | 0.76 | -0.69 | -1.61 | 0.24  | 0.14 | 0.53 | LC/MS Neg       | 1367   | 215.10 |    | 10398396 | 39825-23-5          |
| N2-acetyl,N6,N6-dimethyllysine                 | Amino Acid                        | Lysine Metabolism                                            | -0.61 | -1.81 | 0.59  | 0.32 | 0.68 | -0.75 | -1.48 | -0.02 | 0.04 | 0.31 | LC/MS Pos Early | 2180   | 217.15 | NA |          |                     |
| N2-acetyllysine                                | Amino Acid                        | Lysine Metabolism                                            | 2.28  | 0.29  | 4.27  | 0.02 | 0.26 | 0.69  | -0.53 | 1.91  | 0.27 | 0.65 | LC/MS Polar     | 3372.6 | 187.11 |    | 92907    | 1946-82-3           |
| N6,N6,N6-trimethyllysine                       | Amino Acid                        | Lysine Metabolism                                            | 3.62  | -0.03 | 7.27  | 0.05 | 0.32 | 1.06  | -1.18 | 3.29  | 0.35 | 0.70 | LC/MS Pos Early | 2825   | 189.16 |    | 440120   | 23284-33-5          |
| N6-acetyllysine                                | Amino Acid                        | Lysine Metabolism                                            | 5.70  | -0.20 | 11.60 | 0.06 | 0.33 | 1.26  | -2.35 | 4.87  | 0.49 | 0.80 | LC/MS Neg       | 1059   | 187.11 |    | 92832    | 692-04-6            |
| N6-carbamoylthreonyladenosine                  | Nucleotide                        | Purine Metabolism, Adenine containing                        | 6.44  | 2.88  | 10.00 | 0.00 | 0.05 | 2.43  | 0.24  | 4.62  | 0.03 | 0.26 | LC/MS Neg       | 2164   | 411.13 |    | 161466   | 24719-82-2          |
| N6-carboxymethyllysine                         | Carbohydrate                      | Advanced Glycation End-product                               | -0.27 | -1.90 | 1.35  | 0.74 | 0.91 | -0.38 | -1.37 | 0.61  | 0.46 | 0.77 | LC/MS Pos Early | 2500   | 205.12 |    | 123800   |                     |
| N6-methyladenosine                             | Nucleotide                        | Purine Metabolism, Adenine containing                        | -1.19 | -2.62 | 0.23  | 0.10 | 0.41 | 0.02  | -0.85 | 0.89  | 0.97 | 0.99 | LC/MS Pos Early | 2264   | 282.12 |    | 1869     | 1867-73-8           |
| N6-methyllysine                                | Amino Acid                        | Lysine Metabolism                                            | -1.79 | -3.43 | -0.15 | 0.03 | 0.27 | -1.35 | -2.35 | -0.35 | 0.01 | 0.13 | LC/MS Pos Early | 2836   | 161.13 | NA |          |                     |
| N-acetyl-1-methylhistidine*                    | Amino Acid                        | Histidine Metabolism                                         | 1.84  | 0.44  | 3.25  | 0.01 | 0.17 | 0.02  | -0.84 | 0.89  | 0.96 | 0.98 | LC/MS Pos Early | 2100   | 212.10 |    | 193270   |                     |
| N-acetyl-2-aminooctanoate*                     | Lipid                             | Fatty Acid, Amino                                            | 0.58  | -1.25 | 2.41  | 0.54 | 0.83 | 0.04  | -1.08 | 1.16  | 0.94 | 0.98 | LC/MS Neg       | 3943   | 200.13 |    | 95555    |                     |
| N-acetylalanine                                | Amino Acid                        | Alanine and Aspartate Metabolism                             | 9.04  | 2.08  | 16.00 | 0.01 | 0.17 | 5.09  | 0.84  | 9.34  | 0.02 | 0.22 | LC/MS Polar     | 1564.8 | 130.05 |    | 88064    | 97-69-8             |
| N-acetyllainin                                 | Xenobiotics                       | Food Component/Plant                                         | 0.42  | -0.41 | 1.24  | 0.32 | 0.68 | 0.04  | -0.46 | 0.55  | 0.87 | 0.94 | LC/MS Neg       | 1467   | 218.05 | NA |          |                     |
| N-acetylarginine                               | Amino Acid                        | Urea cycle, Arginine and Proline Metabolism                  | 4.33  | 1.12  | 7.55  | 0.01 | 0.16 | 1.90  | -0.07 | 3.87  | 0.06 | 0.35 | LC/MS Pos Early | 2245   | 217.13 |    | 67427    | 155-84-0            |
| N-acetylasparagine                             | Amino Acid                        | Alanine and Aspartate Metabolism                             | -0.35 | -2.35 | 1.64  | 0.73 | 0.91 | 0.17  | -1.04 | 1.39  | 0.78 | 0.91 | LC/MS Pos Early | 785    | 175.07 |    | 99715    | 4033-40-3           |
| N-acetylaspartate (NAA)                        | Amino Acid                        | Alanine and Aspartate Metabolism                             | 1.61  | -3.03 | 6.25  | 0.49 | 0.80 | 0.63  | -2.20 | 3.46  | 0.66 | 0.87 | LC/MS Pos Early | 880    | 176.06 |    | 65065    | 997-55-7;997-55-7   |
| N-acetyl-beta-alanine                          | Nucleotide                        | Pyrimidine Metabolism, Uracil containing                     | 2.29  | -0.19 | 4.77  | 0.07 | 0.36 | -0.32 | -1.84 | 1.20  | 0.68 | 0.87 | LC/MS Neg       | 773    | 130.05 |    | 76406    | 3025-95-4           |
| N-acetylcarnosine                              | Amino Acid                        | Histidine Metabolism                                         | 3.35  | 0.76  | 5.95  | 0.01 | 0.17 | 2.22  | 0.64  | 3.80  | 0.01 | 0.11 | LC/MS Pos Early | 2141   | 269.12 |    | 9903482  | 56253-15-2          |
| N-acetylglucosamine/N-acetylgalactosamine      | Carbohydrate                      | Aminosugar Metabolism                                        | 3.06  | -1.36 | 7.48  | 0.17 | 0.52 | 0.66  | -2.04 | 3.36  | 0.63 | 0.86 | LC/MS Pos Early | 715    | 222.10 |    | 24139    |                     |
| N-acetylglutamate                              | Amino Acid                        | Glutamate Metabolism                                         | 2.05  | -0.86 | 4.96  | 0.17 | 0.51 | 1.01  | -0.77 | 2.78  | 0.27 | 0.65 | LC/MS Pos Early | 1050   | 190.07 |    | 70914    |                     |
| N-acetylglutamine                              | Amino Acid                        | Glutamate Metabolism                                         | 0.21  | -1.56 | 1.99  | 0.81 | 0.93 | -0.05 | -1.14 | 1.03  | 0.93 | 0.97 | LC/MS Pos Early | 845    | 189.09 |    | 182230   | 2490-97-3           |
| N-acetyllysine                                 | Amino Acid                        | Glycine, Serine and Threonine Metabolism                     | 0.33  | -1.90 | 2.55  | 0.77 | 0.92 | -0.28 | -1.64 | 1.07  | 0.68 | 0.87 | LC/MS Pos Early | 826    | 118.05 |    | 10972    | 543-24-8            |
| N-acetylhistidine                              | Amino Acid                        | Histidine Metabolism                                         | 1.56  | -0.14 | 3.26  | 0.07 | 0.36 | 0.37  | -0.67 | 1.41  | 0.48 | 0.79 | LC/MS Pos Early | 2065   | 198.09 |    | 75619    | 39145-52-3          |
| N-acetylisoleucine                             | Amino Acid                        | Leucine, Isoleucine and Valine Metabolism                    | -0.34 | -3.44 | 2.76  | 0.83 | 0.94 | -0.14 | -2.03 | 1.76  | 0.89 | 0.95 | LC/MS Neg       | 2325   | 172.10 |    | 2802421  | 3077-46-1           |
| N-acetyl-isoputrescine*                        | Amino Acid                        | Polyamine Metabolism                                         | 2.01  | -1.03 | 5.05  | 0.19 | 0.55 | 1.26  | -0.59 | 3.12  | 0.18 | 0.57 | LC/MS Pos Early | 2305   | 203.14 | NA |          |                     |
| N-acetyllysine                                 | Amino Acid                        | Leucine, Isoleucine and Valine Metabolism                    | 0.60  | -3.10 | 4.31  | 0.75 | 0.91 | -0.10 | -2.36 | 2.16  | 0.93 | 0.97 | LC/MS Neg       | 2400   | 172.10 |    | 70912    | 1188-21-2           |
| N-acetylmethionine                             | Amino Acid                        | Methionine, Cysteine, SAM and Taurine Metabolism             | 1.22  | -0.58 | 3.02  | 0.18 | 0.53 | -0.19 | -1.29 | 0.90  | 0.73 | 0.89 | LC/MS Neg       | 1787   | 190.05 |    | 448580   | 65-82-7             |
| N-acetylnorleucine                             | Carbohydrate                      | Aminosugar Metabolism                                        | 2.42  | -1.52 | 6.35  | 0.23 | 0.58 | 1.03  | -1.37 | 3.43  | 0.40 | 0.74 | LC/MS Pos Early | 660    | 310.11 |    | 439197   | 131-48-6            |
| N-acetylphenylalanine                          | Amino Acid                        | Phenylalanine Metabolism                                     | 0.09  | -3.65 | 3.84  | 0.96 | 0.98 | -1.19 | -3.47 | 1.09  | 0.31 | 0.67 | LC/MS Neg       | 2597   | 206.08 |    | 74839    | 2018                |



|                                                     |                        |                                                              |       |       |       |      |      |       |       |       |      |      |                 |        |        |          |                     |        |
|-----------------------------------------------------|------------------------|--------------------------------------------------------------|-------|-------|-------|------|------|-------|-------|-------|------|------|-----------------|--------|--------|----------|---------------------|--------|
| sphingomyelin (d18:1/20:0, d16:1/22:0)*             | Lipid                  | Sphingomyelins                                               | -1.54 | -6.83 | 3.75  | 0.57 | 0.84 | 2.07  | -1.16 | 5.29  | 0.21 | 0.60 | LC/MS Pos Late  | 2685   | 759.64 | NA       |                     |        |
| sphingomyelin (d18:1/20:1, d18:2/20:0)*             | Lipid                  | Sphingomyelins                                               | -4.79 | -9.56 | -0.01 | 0.05 | 0.32 | -1.66 | -4.58 | 1.26  | 0.26 | 0.65 | LC/MS Pos Late  | 2383   | 757.62 | NA       | 222403-67-0         |        |
| sphingomyelin (d18:1/20:2, d18:2/20:1, d16:1/22:2)* | Lipid                  | Sphingomyelins                                               | -0.22 | -2.56 | 2.13  | 0.86 | 0.95 | 0.31  | -1.12 | 1.74  | 0.67 | 0.87 | LC/MS Pos Late  | 2039   | 755.61 | NA       |                     |        |
| sphingomyelin (d18:1/21:0, d17:1/22:0, d16:1/23:0)* | Lipid                  | Sphingomyelins                                               | 4.43  | 0.87  | 7.99  | 0.01 | 0.20 | 2.77  | 0.59  | 4.94  | 0.01 | 0.17 | LC/MS Pos Late  | 2793   | 773.65 | NA       |                     |        |
| sphingomyelin (d18:1/22:1, d18:2/22:0, d16:1/24:1)* | Lipid                  | Sphingomyelins                                               | -1.38 | -6.51 | 3.75  | 0.60 | 0.86 | 0.26  | -2.87 | 3.39  | 0.87 | 0.94 | LC/MS Pos Late  | 2666   | 785.65 | NA       |                     |        |
| sphingomyelin (d18:1/22:2, d18:2/22:1, d16:1/24:2)* | Lipid                  | Sphingomyelins                                               | -3.78 | -6.62 | -0.93 | 0.01 | 0.16 | -2.52 | -4.25 | -0.79 | 0.00 | 0.10 | LC/MS Pos Late  | 2209   | 783.64 | NA       |                     |        |
| sphingomyelin (d18:1/24:1, d18:2/24:0)*             | Lipid                  | Sphingomyelins                                               | -4.88 | -8.84 | -0.91 | 0.02 | 0.21 | -2.81 | -5.23 | -0.39 | 0.02 | 0.23 | LC/MS Pos Late  | 3033   | 813.68 | NA       | 94359-13-4          |        |
| sphingomyelin (d18:2/14:0, d18:1/14:1)*             | Lipid                  | Sphingomyelins                                               | 4.06  | 0.72  | 7.40  | 0.02 | 0.21 | 2.35  | 0.31  | 4.39  | 0.02 | 0.23 | LC/MS Pos Late  | 1860   | 673.53 | NA       |                     |        |
| sphingomyelin (d18:2/16:0, d18:1/16:1)*             | Lipid                  | Sphingomyelins                                               | 4.96  | -0.50 | 10.41 | 0.07 | 0.36 | 3.26  | -0.06 | 6.59  | 0.05 | 0.34 | LC/MS Pos Late  | 2002   | 701.56 | NA       |                     |        |
| sphingomyelin (d18:2/18:1)*                         | Lipid                  | Sphingomyelins                                               | -0.28 | -4.19 | 3.62  | 0.89 | 0.96 | 0.51  | -1.87 | 2.89  | 0.67 | 0.87 | LC/MS Pos Late  | 1904   | 727.57 | NA       |                     |        |
| sphingomyelin (d18:2/21:0, d16:2/23:0)*             | Lipid                  | Sphingomyelins                                               | 0.21  | -1.95 | 2.38  | 0.85 | 0.95 | 0.37  | -0.95 | 1.69  | 0.58 | 0.83 | LC/MS Pos Late  | 2330   | 771.64 | NA       |                     |        |
| sphingomyelin (d18:2/23:0, d18:1/23:1, d17:1/24:1)* | Lipid                  | Sphingomyelins                                               | 3.14  | -1.23 | 7.51  | 0.16 | 0.50 | 0.88  | -1.80 | 3.55  | 0.52 | 0.81 | LC/MS Pos Late  | 2845   | 799.67 | NA       |                     |        |
| sphingomyelin (d18:2/23:1)*                         | Lipid                  | Sphingomyelins                                               | 1.94  | -0.31 | 4.19  | 0.09 | 0.38 | 0.46  | -0.92 | 1.84  | 0.51 | 0.81 | LC/MS Pos Late  | 2315   | 797.65 | NA       |                     |        |
| sphingomyelin (d18:2/24:1, d18:1/24:2)*             | Lipid                  | Sphingomyelins                                               | -3.11 | -7.17 | 0.95  | 0.13 | 0.47 | -2.45 | -4.92 | 0.02  | 0.05 | 0.34 | LC/MS Pos Late  | 2635   | 811.67 | NA       |                     |        |
| sphingomyelin (d18:2/24:2)*                         | Lipid                  | Sphingomyelins                                               | 3.99  | 1.87  | 6.11  | 0.00 | 0.05 | 2.48  | 1.19  | 3.77  | 0.00 | 0.02 | LC/MS Pos Late  | 2215   | 809.65 | NA       |                     |        |
| sphingosine                                         | Lipid                  | Sphingosines                                                 | 0.12  | -0.93 | 1.18  | 0.82 | 0.93 | -0.26 | -0.90 | 0.38  | 0.42 | 0.75 | LC/MS Pos Late  | 1393   | 300.29 | 5353955  | 123-78-4            | C00319 |
| sphingosine 1-phosphate                             | Lipid                  | Sphingosines                                                 | -0.53 | -3.07 | 2.01  | 0.68 | 0.89 | -0.92 | -2.47 | 0.63  | 0.24 | 0.64 | LC/MS Polar     | 1850   | 378.24 | 5283560  | 26993-30-6          | C06124 |
| stachydrine                                         | Xenobiotics            | Food Component/Plant                                         | 0.51  | -0.34 | 1.37  | 0.24 | 0.58 | 0.37  | -0.15 | 0.89  | 0.16 | 0.56 | LC/MS Pos Early | 1440   | 144.10 | 115244   | 4136-37-2           | C10172 |
| stearate (18:0)                                     | Lipid                  | Long Chain Saturated Fatty Acid                              | 4.19  | 0.07  | 8.32  | 0.05 | 0.31 | 2.81  | 0.30  | 5.33  | 0.03 | 0.26 | LC/MS Neg       | 5872   | 283.26 | 5281     | 57-11-4             | C01530 |
| stearidonate (18:4n3)                               | Lipid                  | Long Chain Polyunsaturated Fatty Acid (n3 and n6)            | 1.19  | -0.32 | 2.69  | 0.12 | 0.45 | 0.44  | -0.48 | 1.36  | 0.35 | 0.70 | LC/MS Neg       | 5395   | 275.20 | 5312508  | 111174-40-4         | C16300 |
| stearoyl sphingomyelin (d18:1/18:0)                 | Lipid                  | Sphingomyelins                                               | -0.47 | -4.85 | 3.91  | 0.83 | 0.94 | 1.35  | -1.32 | 4.02  | 0.32 | 0.68 | LC/MS Pos Late  | 2400   | 731.61 | 6453725  | 85187-10-6;85187-10 | C00550 |
| stearoylcarnitine (C18)                             | Lipid                  | Fatty Acid Metabolism (Acyl Carnitine, Long Chain Saturated) | 1.16  | -1.75 | 4.07  | 0.43 | 0.75 | 0.63  | -1.15 | 2.40  | 0.49 | 0.80 | LC/MS Pos Late  | 1485   | 428.37 | 6428855  | 18822-91-8          |        |
| stearoylcholine*                                    | Lipid                  | Fatty Acid Metabolism (Acyl Choline)                         | 0.57  | -1.44 | 2.59  | 0.58 | 0.84 | 1.04  | -0.19 | 2.26  | 0.10 | 0.44 | LC/MS Pos Late  | 1520   | 370.37 | NA       |                     |        |
| suberate (C8-DC)                                    | Lipid                  | Fatty Acid, Dicarboxylate                                    | 1.60  | -0.16 | 3.68  | 0.07 | 0.36 | 0.79  | -0.29 | 1.86  | 0.15 | 0.54 | LC/MS Polar     | 2577.6 | 173.08 | 10457    | 505-48-6            | C08278 |
| succinimide                                         | Xenobiotics            | Chemical                                                     | 0.74  | -1.79 | 3.27  | 0.57 | 0.84 | 0.81  | -0.73 | 2.35  | 0.30 | 0.67 | LC/MS Polar     | 2155   | 116.04 | 11439    | 123-56-8            | C07273 |
| succinylcarnitine (C4)                              | Energy                 | TCA Cycle                                                    | 2.10  | -1.39 | 5.59  | 0.24 | 0.58 | 1.15  | -0.98 | 3.28  | 0.29 | 0.66 | LC/MS Pos Early | 2291   | 262.13 | 71464481 | 256928-74-2         |        |
| sucrose                                             | Carbohydrate           | Disaccharides and Oligosaccharides                           | 0.49  | -0.40 | 1.37  | 0.28 | 0.63 | 0.31  | -0.23 | 0.85  | 0.27 | 0.65 | LC/MS Polar     | 3092   | 387.11 | 5988     | 57-50-1             | C00089 |
| sulfate*                                            | Xenobiotics            | Chemical                                                     | 2.89  | -3.25 | 9.03  | 0.36 | 0.70 | -0.21 | -3.96 | 3.54  | 0.91 | 0.96 | LC/MS Neg       | 616    | 96.96  | 1118     | 14808-79-8          | C00059 |
| tartarate                                           | Xenobiotics            | Food Component/Plant                                         | -0.13 | -0.96 | 0.70  | 0.76 | 0.92 | 0.11  | -0.39 | 0.62  | 0.66 | 0.87 | LC/MS Neg       | 615.3  | 149.01 | 444305   | 87-69-4;6106-24-7   | C00898 |
| tartrate (hydroxymalonate)                          | Xenobiotics            | Food Component/Plant                                         | 0.65  | -1.42 | 2.72  | 0.54 | 0.83 | -0.41 | -1.67 | 0.86  | 0.53 | 0.82 | LC/MS Neg       | 610    | 119.00 | 45       | 80-69-3             | C02287 |
| taurine                                             | Amino Acid             | Methionine, Cysteine, SAM and Taurine Metabolism             | -0.46 | -3.18 | 2.26  | 0.74 | 0.91 | -1.12 | -2.78 | 0.53  | 0.18 | 0.57 | LC/MS Pos Early | 660    | 126.02 | 1123     | 107-35-7            | C00245 |
| taurochenodeoxycholate                              | Lipid                  | Primary Bile Acid Metabolism                                 | 0.10  | -0.55 | 0.74  | 0.77 | 0.92 | 0.08  | -0.32 | 0.47  | 0.71 | 0.88 | LC/MS Neg       | 5250   | 498.29 | 387316   | 6009-98-9           | C05465 |
| taurochenodeoxycholic acid 3-sulfate                | Lipid                  | Secondary Bile Acid Metabolism                               | 0.62  | -0.33 | 1.56  | 0.20 | 0.55 | 0.26  | -0.32 | 0.83  | 0.38 | 0.70 | LC/MS Neg       | 4800   | 288.62 | NA       |                     |        |
| taurochenolate sulfate*                             | Lipid                  | Secondary Bile Acid Metabolism                               | 0.52  | -0.98 | 2.03  | 0.50 | 0.80 | 0.65  | -0.27 | 1.56  | 0.17 | 0.56 | LC/MS Neg       | 4750   | 279.61 | NA       |                     |        |
| taurothiocholate 3-sulfate                          | Lipid                  | Secondary Bile Acid Metabolism                               | -0.34 | -1.01 | 0.33  | 0.32 | 0.68 | -0.16 | -0.57 | 0.25  | 0.44 | 0.76 | LC/MS Neg       | 5027   | 280.62 | 440071   | 64936-83-0          | C03642 |
| tetradecadienedioate (C14:2-DC)*                    | Lipid                  | Fatty Acid, Dicarboxylate                                    | 0.54  | -0.87 | 1.95  | 0.45 | 0.76 | 0.59  | -0.27 | 1.45  | 0.18 | 0.57 | LC/MS Neg       | 3172   | 253.14 | NA       |                     |        |
| tetradecadienoate (14:2)*                           | Lipid                  | Fatty Acid, Dicarboxylate                                    | 2.24  | 0.63  | 3.85  | 0.01 | 0.14 | 1.34  | 0.35  | 2.32  | 0.01 | 0.13 | LC/MS Neg       | 5315   | 223.17 | NA       |                     |        |
| tetradecanedioate (C14)                             | Lipid                  | Fatty Acid, Dicarboxylate                                    | 1.57  | -0.14 | 3.28  | 0.07 | 0.36 | 0.95  | -0.09 | 1.99  | 0.07 | 0.40 | LC/MS Neg       | 3985   | 257.18 | 13185    | 821-38-5            |        |
| tetrahydrocortisone glucuronide (5)                 | Lipids                 | Corticosteroids                                              | 1.43  | -0.16 | 3.03  | 0.08 | 0.37 | 1.31  | 0.35  | 2.28  | 0.01 | 0.13 | LC/MS Neg       | 4697   | 539.25 | NA       |                     |        |
| thiopropine                                         | Xenobiotics            | Chemical                                                     | 2.77  | 0.25  | 5.29  | 0.03 | 0.27 | 1.00  | -0.54 | 2.55  | 0.20 | 0.60 | LC/MS Pos Early | 1250   | 134.03 | 93176    | 34592-47-4          |        |
| threonate                                           | Cofactors and Vitamins | Ascorbate and Aldarate Metabolism                            | -2.80 | -5.51 | -0.08 | 0.04 | 0.30 | -1.34 | -3.00 | 0.32  | 0.11 | 0.47 | LC/MS Polar     | 2384   | 135.03 | 151152   | 70753-61-6          | C01620 |
| threonine                                           | Amino Acid             | Glycine, Serine and Threonine Metabolism                     | 3.17  | -1.29 | 7.63  | 0.16 | 0.51 | 1.73  | -0.99 | 4.45  | 0.21 | 0.61 | LC/MS Pos Early | 1514   | 120.07 | 6288     | 72-19-5             | C00188 |
| threoynphenylalanine                                | Peptide                | Dipeptide                                                    | 0.20  | -0.88 | 1.29  | 0.71 | 0.91 | -0.31 | -0.97 | 0.35  | 0.36 | 0.70 | LC/MS Pos Early | 3077   | 267.13 | 4099799  | 16875-27-7          |        |
| thyroxine                                           | Amino Acid             | Tyrosine Metabolism                                          | 0.61  | -1.04 | 2.27  | 0.47 | 0.78 | 1.07  | 0.07  | 2.08  | 0.04 | 0.28 | LC/MS Neg       | 4808   | 775.68 | 5819     | 51-48-9             | C01829 |
| tiglyl carnitine (C5)                               | Amino Acid             | Leucine, Isoleucine and Valine Metabolism                    | 1.94  | 0.24  | 3.63  | 0.03 | 0.26 | 0.32  | -0.72 | 1.37  | 0.54 | 0.82 | LC/MS Pos Early | 2962   | 244.15 | 22833596 | 64191-86-2          |        |
| trans-uroacnate                                     | Amino Acid             | Histidine Metabolism                                         | -2.81 | -6.08 | 0.46  | 0.09 | 0.38 | -1.15 | -3.15 | 0.84  | 0.26 | 0.65 | LC/MS Neg       | 777.7  | 137.04 | 736715   | 104-98-3            | C00785 |
| tricosanoyl sphingomyelin (d18:1/23:0)*             | Lipid                  | Sphingomyelins                                               | 6.10  | 2.68  | 9.52  | 0.00 | 0.05 | 4.24  | 2.16  | 6.32  | 0.00 | 0.01 | LC/MS Pos Late  | 3200   | 801.68 | NA       |                     |        |
| tridecenedioate (C13:1-DC)*                         | Lipid                  | Fatty Acid, Dicarboxylate                                    | 0.55  | -0.68 | 1.78  | 0.38 | 0.71 | 0.50  | -0.25 | 1.25  | 0.19 | 0.58 | LC/MS Neg       | 3121   | 241.14 | NA       |                     |        |
| trigonelline (N-methylnicotinate)                   | Cofactors and Vitamins | Nicotinate and Nicotinamide Metabolism                       | 0.33  | -0.93 | 1.59  | 0.60 | 0.86 | 0.13  | -0.64 | 0.90  | 0.74 | 0.89 | LC/MS Pos Early | 1388   | 138.05 | 5570     | 535-83-1            | C01004 |
| trimethylamine N-oxide                              | Lipid                  | Phospholipid Metabolism                                      | -0.10 | -1.75 | 1.55  | 0.90 | 0.96 | -0.39 | -1.39 | 0.62  | 0.45 | 0.77 | LC/MS Pos Early | 2100   | 76.08  | 1145     | 1184-78-7           | C01104 |
| tryptophan                                          | Amino Acid             | Tryptophan Metabolism                                        | 1.93  | -3.41 | 7.28  | 0.48 | 0.78 | 1.24  | -2.02 | 4.50  | 0.46 | 0.77 | LC/MS Pos Early | 2986   | 205.10 | 6305     | 73-22-3             | C00078 |
| tryptophan betaine                                  | Amino Acid             | Tryptophan Metabolism                                        | 0.83  | -0.25 | 1.91  | 0.13 | 0.47 | 0.29  | -0.37 | 0.96  | 0.38 | 0.72 | LC/MS Pos Early | 2673   | 247.14 | 442106   | 20671-76-5          | C09213 |
| tyramine O-sulfate                                  | Amino Acid             | Tyrosine Metabolism                                          | 0.04  | -0.95 | 1.03  | 0.93 | 0.97 | 0.20  | -0.41 | 0.80  | 0.53 | 0.82 | LC/MS Neg       | 1565   | 216.03 | 153005   | 30223-92-8          |        |
| tyr-asn                                             | Peptide                | Dipeptide                                                    | 0.19  | -0.87 | 1.25  | 0.73 | 0.91 | -0.35 | -1.00 | 0.29  | 0.29 | 0.65 | LC/MS Neg       | 1544   | 294.11 | NA       |                     |        |
| tyrosine                                            | Amino Acid             | Tyrosine Metabolism                                          | 4.54  | -0.57 | 9.65  | 0.08 | 0.37 | 2.86  | -0.25 | 5.98  | 0.07 | 0.40 | LC/MS Pos Early | 2430   | 182.08 | 6057     | 60-18-4             | C00082 |
| undecanedioate (C11-DC)                             | Lipid                  | Fatty Acid, Dicarboxylate                                    | 0.20  | -2.23 | 2.63  | 0.87 | 0.95 | 0.73  | -0.75 | 2.21  | 0.34 | 0.69 | LC/MS Neg       | 2440   | 215.13 | 15816    | 1852-04-6           |        |
| undecanoate (11:0)                                  | Lipid                  | Medium Chain Fatty Acid                                      | 2.16  | -4.74 | 9.07  | 0.54 | 0.83 | -1.31 | -5.52 | 2.90  | 0.54 | 0.82 | LC/MS Neg       | 5219.2 | 185.15 | 8180     | 334-48-5            | C17715 |
| uracil                                              | Nucleotide             | Pyrimidine Metabolism, Uracil containing                     | -1.29 | -3.83 | 1.26  | 0.32 | 0.68 | -0.59 | -2.14 | 0.97  | 0.46 | 0.77 | LC/MS Polar     | 1089.7 | 111.02 | 1174     | 66-22-8             | C00106 |
| urate                                               | Nucleotide             | Purine Metabolism, (Hypo)Xanthine/Inosine containing         | 5.31  | 0.02  | 10.60 | 0.05 | 0.32 | 3.05  | -0.17 | 6.28  | 0.06 | 0.37 | LC/MS Neg       | 757.1  | 167.02 | 1175     | 69-93-2;120K5305    | C00366 |
| urea                                                | Amino Acid             | Urea cycle, Arginine and Proline Metabolism                  | 0.04  | -2.99 | 3.07  | 0.98 | 0.99 | -1.05 | -2.89 | 0.80  | 0.27 | 0.65 | LC/MS Pos Early | 700    | 121.07 | 1176     | 57-13-6             | C00086 |
| uridine                                             | Nucleotide             | Pyrimidine Metabolism, Uracil containing                     | -0.46 | -5.31 | 4.38  | 0.85 | 0.95 | -1.09 | -4.05 | 1.86  | 0.47 | 0.78 | LC/MS Neg       | 1457.6 | 243.06 | 6029     | 58-96-8             | C00299 |
| (5)                                                 | Lipid                  | Corticosteroids                                              | 1.18  | -0.55 | 2.92  | 0.18 | 0.53 | 1.28  | 0.23  | 2.33  | 0.02 | 0.21 | LC/MS Neg       | 4678   | 541.26 | NA       |                     |        |
| ursodeoxycholate                                    | Lipid                  | Secondary Bile Acid Metabolism                               | -0.23 | -1.19 | 0.72  | 0.63 | 0.87 | -0.25 | -0.83 | 0.33  | 0.41 | 0.74 | LC/MS Neg       | 5055   | 391.29 | 31401    | 128-13-2            | C07880 |
| valine                                              | Amino Acid             | Leucine, Isoleucine and Valine Metabolism                    | 2.68  | -3.25 | 8.61  | 0.38 | 0.71 | 3.36  | -0.25 | 6.96  | 0.07 | 0.38 | LC/MS Pos Early | 2479   | 118.09 | 6287     | 72-18-4             | C00183 |
| valylleucine                                        | Peptide                | Dipeptide                                                    | -0.27 | -1.16 | 0.63  | 0.56 | 0.84 | 0.23  | -0.32 | 0.77  | 0.41 | 0.74 | LC/MS Pos Early | 3138   | 231.17 | 352039   | 22906-55-4          |        |
| vanillactate                                        | Amino Acid             | Tyrosine Metabolism                                          | 0.94  | -1.04 | 2.92  | 0.35 | 0.70 | -0.26 | -1.47 | 0.94  | 0.67 | 0.87 | LC/MS Neg       | 1625   | 211.06 | 160637   | 2475-56-1           |        |
| vanillic acid glycine                               | Xenobiotics            | Food Component/Plant                                         | -0.02 |       |       |      |      |       |       |       |      |      |                 |        |        |          |                     |        |

|           |  |  |  |       |       |       |      |      |       |       |      |      |      |                 |        |        |    |
|-----------|--|--|--|-------|-------|-------|------|------|-------|-------|------|------|------|-----------------|--------|--------|----|
| X - 23636 |  |  |  | 0.43  | -0.97 | 1.83  | 0.55 | 0.83 | 0.60  | -0.25 | 1.45 | 0.17 | 0.56 | LC/MS Pos Early | 1129   | 249.11 | NA |
| X - 23639 |  |  |  | 2.27  | -0.52 | 5.06  | 0.11 | 0.43 | 0.60  | -1.11 | 2.31 | 0.49 | 0.80 | LC/MS Pos Early | 1640   | 134.08 | NA |
| X - 23644 |  |  |  | 0.02  | -1.28 | 1.32  | 0.98 | 0.99 | 0.11  | -0.68 | 0.91 | 0.78 | 0.91 | LC/MS Pos Early | 983    | 146.08 | NA |
| X - 23659 |  |  |  | 0.14  | -1.58 | 1.87  | 0.87 | 0.95 | 0.00  | -1.05 | 1.05 | 1.00 | 1.00 | LC/MS Pos Early | 2449   | 143.12 | NA |
| X - 23739 |  |  |  | -0.26 | -2.36 | 1.85  | 0.81 | 0.93 | 0.66  | -0.62 | 1.94 | 0.31 | 0.68 | LC/MS Pos Early | 1286   | 262.10 | NA |
| X - 23780 |  |  |  | -0.27 | -1.54 | 1.01  | 0.68 | 0.89 | -0.22 | -1.00 | 0.56 | 0.58 | 0.83 | LC/MS Pos Early | 2190   | 144.10 | NA |
| X - 23782 |  |  |  | 0.55  | -0.91 | 2.01  | 0.46 | 0.77 | 0.12  | -0.77 | 1.02 | 0.78 | 0.91 | LC/MS Pos Late  | 1627   | 349.27 | NA |
| X - 23974 |  |  |  | -1.49 | -3.78 | 0.81  | 0.20 | 0.55 | -0.91 | -2.31 | 0.49 | 0.20 | 0.60 | LC/MS Neg       | 4995.3 | 197.12 | NA |
| X - 24243 |  |  |  | -0.85 | -2.69 | 0.99  | 0.36 | 0.71 | -0.61 | -1.73 | 0.51 | 0.29 | 0.65 | LC/MS Pos Early | 1003   | 132.07 | NA |
| X - 24309 |  |  |  | 1.13  | -0.38 | 2.64  | 0.14 | 0.48 | 0.54  | -0.38 | 1.46 | 0.25 | 0.65 | LC/MS Neg       | 4430   | 321.15 | NA |
| X - 24328 |  |  |  | 0.69  | -0.88 | 2.26  | 0.39 | 0.71 | -0.12 | -1.08 | 0.84 | 0.81 | 0.92 | LC/MS Neg       | 1361.7 | 161.08 | NA |
| X - 24337 |  |  |  | 1.93  | -0.04 | 3.89  | 0.05 | 0.33 | 0.97  | -0.23 | 2.17 | 0.11 | 0.48 | LC/MS Neg       | 1980   | 239.08 | NA |
| X - 24408 |  |  |  | 3.11  | 0.90  | 5.32  | 0.01 | 0.13 | 0.87  | -0.49 | 2.23 | 0.21 | 0.60 | LC/MS Pos Early | 874    | 177.09 | NA |
| X - 24410 |  |  |  | 0.62  | -0.45 | 1.70  | 0.26 | 0.60 | 0.51  | -0.15 | 1.16 | 0.13 | 0.51 | LC/MS Pos Early | 881    | 116.07 | NA |
| X - 24422 |  |  |  | 0.83  | -0.08 | 1.73  | 0.07 | 0.36 | 0.31  | -0.24 | 0.86 | 0.27 | 0.65 | LC/MS Pos Early | 1194   | 271.09 | NA |
| X - 24425 |  |  |  | -0.41 | -3.04 | 2.23  | 0.76 | 0.92 | 0.66  | -0.94 | 2.27 | 0.42 | 0.75 | LC/MS Pos Early | 2378   | 130.10 | NA |
| X - 24455 |  |  |  | -0.96 | -3.12 | 1.20  | 0.38 | 0.71 | -0.58 | -1.89 | 0.74 | 0.39 | 0.73 | LC/MS Pos Early | 2641   | 237.09 | NA |
| X - 24456 |  |  |  | -0.20 | -1.83 | 1.44  | 0.81 | 0.93 | -0.27 | -1.27 | 0.73 | 0.60 | 0.85 | LC/MS Pos Early | 2538   | 237.09 | NA |
| X - 24544 |  |  |  | 1.43  | -0.78 | 3.64  | 0.20 | 0.55 | 1.08  | -0.27 | 2.42 | 0.12 | 0.48 | LC/MS Neg       | 4448   | 411.18 | NA |
| X - 24546 |  |  |  | 0.42  | -0.82 | 1.67  | 0.51 | 0.81 | 0.21  | -0.55 | 0.97 | 0.58 | 0.83 | LC/MS Neg       | 3289   | 231.05 | NA |
| X - 24556 |  |  |  | -0.19 | -1.55 | 1.17  | 0.79 | 0.92 | -0.17 | -1.00 | 0.66 | 0.69 | 0.88 | LC/MS Neg       | 2318   | 283.12 | NA |
| X - 24571 |  |  |  | 0.27  | -0.54 | 1.07  | 0.51 | 0.82 | 0.11  | -0.38 | 0.60 | 0.66 | 0.87 | LC/MS Neg       | 4625   | 303.15 | NA |
| X - 24588 |  |  |  | 4.26  | 1.54  | 6.97  | 0.00 | 0.09 | 2.85  | 1.20  | 4.50 | 0.00 | 0.04 | LC/MS Neg       | 2350   | 485.17 | NA |
| X - 24608 |  |  |  | 0.14  | -1.43 | 1.70  | 0.87 | 0.95 | 0.71  | -0.24 | 1.66 | 0.14 | 0.53 | LC/MS Neg       | 3408   | 174.06 | NA |
| X - 24748 |  |  |  | -0.33 | -2.37 | 1.72  | 0.75 | 0.92 | 0.16  | -1.08 | 1.41 | 0.80 | 0.92 | LC/MS Neg       | 4596   | 321.15 | NA |
| X - 24765 |  |  |  | -0.67 | -3.76 | 2.42  | 0.67 | 0.89 | -0.90 | -2.78 | 0.98 | 0.35 | 0.70 | LC/MS Pos Early | 1800   | 83.02  | NA |
| X - 24812 |  |  |  | 1.55  | -0.06 | 3.17  | 0.06 | 0.33 | 0.30  | -0.69 | 1.29 | 0.55 | 0.83 | LC/MS Pos Early | 2650   | 230.14 | NA |
| X - 24813 |  |  |  | 3.51  | -3.18 | 10.20 | 0.30 | 0.67 | 2.41  | -1.67 | 6.49 | 0.25 | 0.65 | LC/MS Neg       | 1286   | 202.05 | NA |
| X - 24947 |  |  |  | 0.28  | -1.33 | 1.89  | 0.73 | 0.91 | 0.17  | -0.81 | 1.15 | 0.73 | 0.89 | LC/MS Neg       | 4518   | 387.18 | NA |
| X - 24949 |  |  |  | 0.68  | -0.67 | 2.03  | 0.32 | 0.68 | 0.96  | 0.14  | 1.77 | 0.02 | 0.23 | LC/MS Neg       | 4973   | 263.20 | NA |
| X - 24952 |  |  |  | 1.21  | -0.81 | 3.24  | 0.24 | 0.58 | 0.72  | -0.51 | 1.96 | 0.25 | 0.65 | LC/MS Neg       | 5310   | 413.20 | NA |
| X - 25271 |  |  |  | -0.28 | -0.89 | 0.32  | 0.35 | 0.70 | -0.32 | -0.68 | 0.05 | 0.09 | 0.43 | LC/MS Pos Early | 1777   | 156.08 | NA |
| X - 25279 |  |  |  | 0.89  | 0.03  | 1.75  | 0.04 | 0.30 | 0.08  | -0.45 | 0.61 | 0.76 | 0.90 | LC/MS Neg       | 3597   | 223.01 | NA |
| X - 25343 |  |  |  | 0.96  | -0.24 | 2.16  | 0.12 | 0.44 | 0.68  | -0.05 | 1.41 | 0.07 | 0.38 | LC/MS Pos Early | 1043.1 | 226.08 | NA |
| X - 25419 |  |  |  | -0.12 | -0.84 | 0.60  | 0.74 | 0.91 | -0.10 | -0.54 | 0.33 | 0.64 | 0.86 | LC/MS Pos Early | 1629.2 | 129.07 | NA |
| X - 25420 |  |  |  | 1.55  | -1.42 | 4.51  | 0.31 | 0.67 | 0.48  | -1.33 | 2.29 | 0.60 | 0.85 | LC/MS Pos Early | 1712.4 | 147.02 | NA |
| X - 25422 |  |  |  | 2.49  | 0.30  | 4.68  | 0.03 | 0.26 | -0.28 | -1.63 | 1.07 | 0.68 | 0.87 | LC/MS Pos Early | 1730.3 | 175.08 | NA |
| X - 25432 |  |  |  | -0.56 | -1.53 | 0.41  | 0.26 | 0.61 | 0.04  | -0.55 | 0.63 | 0.89 | 0.95 | LC/MS Pos Early | 2567.9 | 184.11 | NA |

| Metabolites with 25-50% values below detection limits (BLD), reference=BLD |                                   |                                                              |              |       |       |       |      |      |       |       |      |      |      |                 |        |         |                             |
|----------------------------------------------------------------------------|-----------------------------------|--------------------------------------------------------------|--------------|-------|-------|-------|------|------|-------|-------|------|------|------|-----------------|--------|---------|-----------------------------|
| 12,13-DIHOME                                                               | Lipid                             | Fatty Acid, Dihydroxy                                        | Below median | -0.21 | -2.11 | 1.69  | 0.83 | 0.94 | 0.19  | -0.97 | 1.34 | 0.75 | 0.90 | LC/MS Neg       | 5137   | 313.238 | 10236635 263399-35-5 C14829 |
| 1-methylxanthine                                                           | Xenobiotics                       | Xanthine Metabolism                                          | Above median | -1.37 | -4.68 | 1.95  |      |      | 0.93  | -1.09 | 2.95 |      | 0.88 | LC/MS Neg       | 1568.8 | 165.042 | 80220 6136-37-4 C16358      |
| 1-palmitoyl-GPG (16:0)*                                                    | Lipid                             | Lysophospholipid                                             | Below median | -0.45 | -2.26 | 1.36  | 0.62 | 0.87 | -0.22 | -1.32 | 0.88 | 0.69 | 0.70 | LC/MS Neg       | 5570   | 483.273 | 3300276                     |
| 21-hydroxypregnenolone monosulfate (1)                                     | Lipid                             | Pregnenolone Steroids                                        | Above median | -1.35 | -4.66 | 1.97  |      |      | 0.95  | -1.07 | 2.97 |      | 0.94 | LC/MS Neg       | 4624   | 411.185 | 174681 88378-34-1           |
| 2-ethylphenylsulfate                                                       | Xenobiotics                       | Benzoate Metabolism                                          | Below median | 0.48  | -1.37 | 2.32  | 0.61 | 0.86 | 0.53  | -0.59 | 1.65 | 0.36 | 0.99 | LC/MS Neg       | 3416   | 201.023 |                             |
| 2-methoxyhydroquinone sulfate (1)                                          | Xenobiotics                       | Benzoate Metabolism                                          | Above median | -1.44 | -4.77 | 1.88  |      |      | 0.85  | -1.17 | 2.88 |      | 0.89 | LC/MS Neg       | 1526   | 218.997 |                             |
| 2-methoxyresorcinol sulfate                                                | Xenobiotics                       | Chemical                                                     | Below median | -0.29 | -2.11 | 1.53  | 0.75 | 0.92 | -0.01 | -1.12 | 1.10 | 0.98 | 0.97 | LC/MS Neg       | 1863   | 218.997 | 1446269-78-8                |
| 3-(3-hydroxyphenyl)propio te sulfate                                       | Xenobiotics                       | Benzoate Metabolism                                          | Above median | -1.27 | -4.64 | 2.10  |      |      | 0.94  | -1.12 | 3.00 |      | 0.58 | LC/MS Neg       | 1294   | 245.013 | 187488 86321-32-6           |
| 3-(4-hydroxyphenyl)propio te                                               | Xenobiotics                       | Benzoate Metabolism                                          | Below median | -0.94 | -2.69 | 0.82  | 0.29 | 0.66 | -0.71 | -1.78 | 0.36 | 0.19 | 0.92 | LC/MS Neg       | 1294   | 245.013 |                             |
| 3-acetylphenol sulfate                                                     | Xenobiotics                       | Chemical                                                     | Above median | -1.34 | -4.65 | 1.97  |      |      | 0.96  | -1.06 | 2.98 |      | 0.83 | LC/MS Neg       | 1670   | 165.056 | 10394 501-97-3 C01744       |
| 3-ethylcatechol sulfate (1)                                                | Xenobiotics                       | Food Component/Plant                                         | Below median | -1.82 | -5.18 | 1.53  | 0.13 | 0.47 | -0.33 | -1.40 | 0.75 | 0.55 | 0.87 | LC/MS Neg       | 3422   | 217.018 |                             |
| 3-hydroxydodecanedioate*                                                   | Lipid                             | Fatty Acid, Dicarboxylate                                    | Above median | 0.08  | -1.74 | 1.89  | 0.94 | 0.97 | 0.17  | -0.94 | 1.28 | 0.76 | 0.87 | LC/MS Neg       | 2477   | 215.002 |                             |
| 3-methyladipate                                                            | Lipid                             | Fatty Acid, Dicarboxylate                                    | Below median | -1.39 | -4.74 | 1.95  |      |      | 0.89  | -1.15 | 2.93 |      | 0.80 | LC/MS Polar     | 2865   | 159.066 | 12292 422955                |
| 4-cholesten-3-one                                                          | Lipid                             | Sterol                                                       | Above median | -0.31 | -2.20 | 1.59  | 0.75 | 0.91 | -0.41 | -1.56 | 0.75 | 0.49 | 0.78 | LC/MS Pos Late  | 2520   | 385.347 | 91477 601-57-0 C00599       |
| 4-hydroxycoumarin                                                          | Xenobiotics                       | Drug - Cardiovascular                                        | Below median | -1.38 | -4.69 | 1.94  |      |      | 0.93  | -1.09 | 2.95 |      | 0.93 | LC/MS Neg       | 2470   | 161.024 | 54682930 1076-38-6 C20414   |
| 4-methoxyphenol sulfate                                                    | Amino Acid                        | Tyrosine Metabolism                                          | Above median | -0.01 | -2.00 | 1.97  | 0.99 | 1.00 | 0.45  | -0.76 | 1.66 | 0.47 | 0.87 | LC/MS Neg       | 2412   | 203.002 | 3233-60-1                   |
| 4-vinylguaiacol sulfate                                                    | Xenobiotics                       | Food Component/Plant                                         | Below median | -1.37 | -4.69 | 1.95  |      |      | 0.89  | -1.13 | 2.92 |      | 0.99 | LC/MS Neg       | 3354   | 229.018 |                             |
| 5-acetylamino-6-amino-3-methyluracil                                       | Xenobiotics                       | Xanthine Metabolism                                          | Above median | -1.24 | -4.58 | 2.10  |      |      | 0.93  | -1.11 | 2.97 |      | 0.93 | LC/MS Polar     | 1710   | 197.068 | 88299 1196153-01-1 C16366   |
| 5alpha-androstan-3alpha,17alpha-diol monosulfate                           | Lipid                             | Androgenic Steroids                                          | Below median | -0.34 | -2.14 | 1.47  | 0.71 | 0.91 | -0.13 | -1.23 | 0.97 | 0.82 | 0.95 | LC/MS Neg       | 5208   | 371.19  |                             |
| 5alpha-androstan-3alpha,17beta-diol disulfate                              | Lipid                             | Androgenic Steroids                                          | Above median | -1.39 | -4.70 | 1.93  |      |      | 0.93  | -1.09 | 2.95 |      | 0.83 | LC/MS Neg       | 4275   | 225.07  |                             |
| 5alpha-androstan-3alpha,17beta-diol monosulfate (2)                        | Lipid                             | Androgenic Steroids                                          | Below median | -0.35 | -2.13 | 1.43  | 0.70 | 0.90 | -0.31 | -1.40 | 0.77 | 0.57 | 0.87 | LC/MS Neg       | 5080   | 371.19  |                             |
| 6-bromotryptophan                                                          | Amino Acid                        | Tryptophan Metabolism                                        | Above median | -1.38 | -4.70 | 1.93  |      |      | 0.92  | -1.10 | 2.94 |      | 0.42 | LC/MS Neg       | 3565   | 280.993 |                             |
| 7-hydroxycholesterol (alpha or beta)                                       | Lipid                             | Sterol                                                       | Below median | -1.81 | -3.64 | 0.01  | 0.05 | 0.32 | -0.99 | -2.11 | 0.13 | 0.08 | 0.23 | LC/MS Pos Late  | 1930   | 367.336 | 107722                      |
| 8-methoxykynure te                                                         | Amino Acid                        | Tryptophan Metabolism                                        | Above median | -1.51 | -4.82 | 1.81  |      |      | 1.31  | 0.17  | 2.46 | 0.02 | 0.71 | LC/MS Neg       | 2825   | 218.046 |                             |
| alpha-hydroxycaproate                                                      | Lipid                             | Fatty Acid, Monohydroxy                                      | Below median | 0.37  | -1.50 | 2.23  | 0.70 | 0.90 | 0.52  | -0.62 | 1.65 | 0.37 | 0.79 | LC/MS Neg       | 1920   | 131.071 | 99824 6064-63-7             |
| arachidonoylcarnitine (C20:4)                                              | Lipid                             | Fatty Acid Metabolism (Acyl Carnitine, Polyunsaturated)      | Above median | -1.46 | -4.80 | 1.88  |      |      | -0.40 | -1.57 | 0.74 | 0.48 | 0.76 | LC/MS Pos Late  | 1353   | 448.342 |                             |
| arachidoylcarnitine (C20)*                                                 | Lipid                             | Fatty Acid Metabolism (Acyl Carnitine, Long Chain Saturated) | Below median | -1.24 | -4.62 | 2.15  |      |      | 1.10  | -0.96 | 3.17 |      | 0.65 | LC/MS Pos Late  | 1512   | 456.405 |                             |
| asn-phe                                                                    | Peptide                           | Dipeptide                                                    | Above median | -0.87 | -2.76 | 1.02  | 0.37 | 0.71 | -0.67 | -1.82 | 0.48 | 0.26 | 0.87 | LC/MS Neg       | 2064   | 278.115 |                             |
| bilirubin degradation product, C17H18N2O4 (1)**                            | Partially Characterized Molecules | Partially Characterized Molecules                            | Below median | -1.36 | -4.67 | 1.95  |      |      | 0.94  | -1.07 | 2.96 |      | 0.57 | LC/MS Neg       | 4611   | 313.119 |                             |
| campesterol                                                                | Lipid                             | Sterol                                                       | Above median | -1.66 | -3.55 | 0.22  | 0.08 | 0.37 | -0.25 | -1.40 | 0.91 | 0.68 | 0.88 | LC/MS Pos Late  | 2873   | 383.367 | 173183 474-62-4 C01789      |
| cys-gly, oxidized                                                          | Amino Acid                        | Glutathione Metabolism                                       | Below median | -1.05 | -4.37 | 2.27  |      |      | 0.98  | -1.05 | 3.01 |      | 0.71 | LC/MS Pos Early | 2947   | 355.074 | 333293 7729-20-6            |
| cysteinylglycine                                                           | Amino Acid                        | Glutathione Metabolism                                       | Above median | -1.92 | -3.78 | -0.06 | 0.04 | 0.30 | -0.78 | -1.92 | 0.36 | 0.18 | 0.64 | LC/MS Pos Early | 2132   | 179.049 | 439498 19246-18-5 C01419    |
| cytidine                                                                   | Nucleotide                        | Pyrimidine Metabolism, Cytidine containing                   | Below median | -1.46 | -4.80 | 1.88  |      |      | 1.15  | -0.92 | 3.22 |      | 0.89 | LC/MS Pos Early | 2124   | 244.093 | 6175 65-46-3 C00475         |
| daidzein sulfate (2)                                                       | Xenobiotics                       | Food Component/Plant                                         | Above median | 0.82  | -1.00 | 2.64  | 0.38 | 0.71 | 0.20  | -0.91 | 1.31 | 0.73 | 0.21 | LC/MS Neg       | 3330   | 333.008 |                             |
| dihydroferulic acid sulfate                                                | Xenobiotics                       | Food Component/Plant                                         | Below median | -1.39 | -4.70 | 1.92  |      |      | 0.93  | -1.09 | 2.95 |      | 0.88 | LC/MS Neg       | 1372   | 275.023 |                             |
| ectoine                                                                    | Xenobiotics                       | Chemical                                                     | Above median | 0.23  | -1.61 | 2.07  | 0.81 | 0.93 | -0.22 | -1.34 | 0.90 | 0.70 | 0.91 | LC/MS Pos Early | 1980   | 143.082 | 126041 96702-03-3 C06231    |
| ferulic acid 4-sulfate                                                     | Xenobiotics                       | Food Component/Plant                                         | Below median | -1.48 | -4.87 | 1.90  |      |      | 1.00  | -1.07 | 3.06 |      | 0.86 | LC/MS Neg       | 1200   | 273.007 | 6305574 86321-29-1          |
| Fibrinopeptide A (3-16)                                                    | Peptide                           | Fibrin                                                       |              |       |       |       |      |      |       |       |      |      |      |                 |        |         |                             |

|                                                    |                        |                                                            |                                              |                         |                         |                      |              |                      |                         |                      |               |                      |                      |                     |                     |        |
|----------------------------------------------------|------------------------|------------------------------------------------------------|----------------------------------------------|-------------------------|-------------------------|----------------------|--------------|----------------------|-------------------------|----------------------|---------------|----------------------|----------------------|---------------------|---------------------|--------|
| nicotil mide riboside                              | Cofactors and Vitamins | Monounsaturated)<br>Nicotil te and Nicotil mide Metabolism | Above median<br>Below median<br>Above median | -0.81<br>-0.25<br>-1.34 | -4.17<br>-2.05<br>-4.66 | 2.56<br>1.56<br>1.99 | 0.79<br>0.92 | 0.32<br>0.32<br>0.89 | -0.71<br>-0.77<br>-1.14 | 3.39<br>1.42<br>2.91 | 0.56          | 0.83 LC/MS Pos Early | 2040 255.098         | 439924 1341-23-7    | C03150              |        |
| nisi te (24:6n3)                                   | Lipid                  | Long Chain Polyunsaturated Fatty Acid (n3 and n6)          | Below median<br>Above median                 | -0.68<br>-1.36          | -2.48<br>-4.67          | 1.13<br>1.95         | 0.46         | 0.77                 | 0.10<br>-1.00           | 1.21<br>2.95         | 0.86          | 0.94 LC/MS Neg       | 5657 355.264         | 11792612 68378-49-4 |                     |        |
| N-palmitoyl-sphingadienine (d18:2/16:0)*           | Lipid                  | Ceramides                                                  | Below median<br>Above median                 | 0.65<br>-1.46           | -1.23<br>-4.78          | 2.54<br>1.86         | 0.50         | 0.80                 | 1.10<br>0.78            | -0.05<br>-1.23       | 2.25<br>2.80  | 0.06                 | 0.36 LC/MS Pos Late  | 2490 536.504        |                     |        |
| N-stearoyl-sphingosine (d18:1/18:0)*               | Lipid                  | Ceramides                                                  | Below median<br>Above median                 | -0.41<br>-1.31          | -2.39<br>-4.63          | 1.57<br>2.02         | 0.68         | 0.89                 | 0.37<br>0.88            | -0.84<br>-1.15       | 1.58<br>2.91  | 0.55                 | 0.83 LC/MS Pos Late  | 3392 566.551        | 5283565 104404-17-3 |        |
| oleoyl-linoleoyl-glycerol (18:1/18:2) [1]          | Lipid                  | Diacylglycerol                                             | Below median<br>Above median                 | -2.29<br>-1.62          | -4.18<br>-4.91          | -0.41<br>1.68        | 0.02         | 0.21                 | -0.73<br>0.86           | -1.89<br>-1.16       | 0.43<br>2.88  | 0.22                 | 0.62 LC/MS Pos Late  | 3115 636.556        | 106292-55-1         |        |
| oleoyl-linoleoyl-glycerol (18:1/18:2) [2]          | Lipid                  | Diacylglycerol                                             | Below median<br>Above median                 | -3.76<br>-1.55          | -5.73<br>-4.81          | -1.78<br>1.71        | 0.00         | 0.05                 | -1.77<br>0.85           | -2.98<br>-1.15       | 2.56<br>2.85  | 0.00                 | 0.10 LC/MS Pos Late  | 3223 636.556        | 104346-53-4         |        |
| palmitoleoycholine                                 | Lipid                  | Fatty Acid Metabolism (Acyl Choline)                       | Below median<br>Above median                 | 0.41<br>-1.35           | -1.46<br>-4.66          | 2.29<br>1.97         | 0.66         | 0.89                 | 0.44<br>0.96            | -0.70<br>-1.06       | 1.59<br>2.98  | 0.45                 | 0.77 LC/MS Pos Late  | 1385 340.321        |                     |        |
| phenylacetate                                      | Amino Acid             | Phenylalanine Metabolism                                   | Below median<br>Above median                 | -0.57<br>-1.35          | -2.35<br>-4.66          | 1.21<br>1.96         | 0.53         | 0.83                 | -0.41<br>0.95           | -1.50<br>-1.07       | 0.68<br>2.97  | 0.46                 | 0.77 LC/MS Neg       | 2150 91.0554        | 999 103-82-2        | C07086 |
| phenylacetylglutamate                              | Peptide                | Acetylated Peptides                                        | Below median<br>Above median                 | -0.79<br>-1.27          | -2.59<br>-4.59          | 1.00<br>2.05         | 0.39         | 0.71                 | -0.50<br>1.00           | -1.60<br>-1.03       | 0.59<br>3.02  | 0.37                 | 0.71 LC/MS Neg       | 1630 264.088        | 11579826            |        |
| phenylpyruvate                                     | Amino Acid             | Phenylalanine Metabolism                                   | Below median<br>Above median                 | -1.54<br>-1.55          | -3.28<br>-4.85          | 0.20<br>1.76         | 0.08         | 0.37                 | -0.44<br>0.89           | -1.51<br>-1.14       | 0.63<br>2.91  | 0.42                 | 0.75 LC/MS Neg       | 2515 163.04         | 997 156-06-9        | C00166 |
| pimelate (C7-DC)                                   | Lipid                  | Fatty Acid, Dicarboxylate                                  | Below median<br>Above median                 | -1.80<br>-0.64          | -3.77<br>-4.04          | 0.17<br>2.76         | 0.07         | 0.36                 | -0.70<br>1.22           | -1.91<br>-0.86       | 0.50<br>3.30  | 0.25                 | 0.65 LC/MS Polar     | 2745 159.066        | 385 111-16-0        | C02656 |
| pimeloylcarnitine/3-methyladipoylcarnitine (C7-DC) | Lipid                  | Fatty Acid Metabolism (Acyl Carnitine, Dicarboxylate)      | Below median<br>Above median                 | 0.34<br>-1.42           | -1.43<br>-4.74          | 2.10<br>1.90         | 0.71         | 0.91                 | -0.43<br>0.99           | -1.51<br>-1.03       | 0.65<br>3.02  | 0.43                 | 0.76 LC/MS Pos Early | 2773 304.175        |                     |        |
| preg nediol-3-glucuronide                          | Lipid                  | Progesterin Steroids                                       | Below median<br>Above median                 | -0.60<br>-1.37          | -2.43<br>-4.68          | 1.23<br>1.94         | 0.52         | 0.82                 | -0.45<br>0.93           | -1.56<br>-1.08       | 0.67<br>2.95  | 0.43                 | 0.76 LC/MS Neg       | 5145 495.296        | 123796 1852-49-9    |        |
| preg nolone/allopreg nolone sulfate                | Lipid                  | Progesterin Steroids                                       | Below median<br>Above median                 | 1.33<br>-1.27           | -0.46<br>-4.57          | 3.12<br>2.04         | 0.14         | 0.48                 | 0.31<br>0.96            | -0.79<br>-1.06       | 1.40<br>2.98  | 0.58                 | 0.83 LC/MS Neg       | 5160 397.205        |                     |        |
| sphinganine                                        | Lipid                  | Sphingolipid Synthesis                                     | Below median<br>Above median                 | -0.43<br>-1.28          | -2.23<br>-4.62          | 1.38<br>2.05         | 0.64         | 0.87                 | 0.15<br>0.90            | -0.95<br>-1.13       | 1.25<br>2.94  | 0.79                 | 0.91 LC/MS Pos Late  | 1413 302.305        | 3126 3102-56-5      | C00836 |
| sphinganine-1-phosphate                            | Lipid                  | Sphingolipid Synthesis                                     | Below median<br>Above median                 | -0.01<br>-1.37          | -1.99<br>-4.81          | 1.97<br>2.07         | 0.99         | 1.00                 | -0.67<br>1.25           | -1.88<br>-0.85       | 0.53<br>3.34  | 0.27                 | 0.65 LC/MS Pos Late  | 1431 382.272        | 520 19794-97-9      |        |
| sphingomyelin (d17:1/14:0, d16:1/15:0)*            | Lipid                  | Sphingomyelins                                             | Below median<br>Above median                 | -0.63<br>-1.44          | -2.60<br>-4.76          | 1.34<br>1.88         | 0.53         | 0.83                 | 0.72<br>1.01            | -0.48<br>-1.01       | 1.91<br>3.04  | 0.24                 | 0.64 LC/MS Pos Late  | 1950 661.528        |                     |        |
| sphingomyelin (d17:2/16:0, d18:2/15:0)*            | Lipid                  | Sphingomyelins                                             | Below median<br>Above median                 | 0.60<br>-1.35           | -1.31<br>-4.66          | 2.50<br>1.96         | 0.54         | 0.83                 | 0.80<br>0.97            | -0.36<br>-1.05       | 1.96<br>2.98  | 0.17                 | 0.56 LC/MS Pos Late  | 1837 687.544        |                     |        |
| suberoylcarnitine (C8-DC)                          | Lipid                  | Fatty Acid Metabolism (Acyl Carnitine, Dicarboxylate)      | Below median<br>Above median                 | 0.34<br>-1.41           | -1.42<br>-4.72          | 2.11<br>1.91         | 0.70         | 0.91                 | -0.61<br>1.00           | -1.68<br>-1.03       | 0.47<br>3.02  | 0.27                 | 0.65 LC/MS Pos Early | 2964 318.191        |                     |        |
| succi te                                           | Energy                 | TCA Cycle                                                  | Below median<br>Above median                 | -0.32<br>-1.32          | -2.26<br>-4.65          | 1.61<br>2.01         | 0.74         | 0.91                 | 0.06<br>0.92            | -1.12<br>-1.11       | 1.24<br>2.96  | 0.92                 | 0.96 LC/MS Neg       | 603 117.019         | 1110 110-15-6       | C00042 |
| taurocholate                                       | Lipid                  | Primary Bile Acid Metabolism                               | Below median<br>Above median                 | -2.35<br>-1.27          | -4.10<br>-4.55          | -0.60<br>2.02        | 0.01         | 0.16                 | -0.64<br>0.96           | -1.71<br>-1.05       | 0.44<br>2.98  | 0.24                 | 0.64 LC/MS Neg       | 5150 514.284        | 6675 145-42-6       | C05122 |
| taurodeoxycholate                                  | Lipid                  | Secondary Bile Acid Metabolism                             | Below median<br>Above median                 | -0.75<br>-1.33          | -2.51<br>-4.64          | 1.01<br>1.98         | 0.40         | 0.72                 | -0.29<br>0.95           | -1.36<br>-1.07       | 0.79<br>2.97  | 0.60                 | 0.85 LC/MS Neg       | 5257.4 498.289      | 2733768 207737-97-1 | C05463 |
| theobromine                                        | Xenobiotics            | Xanthine Metabolism                                        | Below median<br>Above median                 | -0.79<br>-1.43          | -2.59<br>-4.74          | 1.00<br>1.89         | 0.38         | 0.71                 | -0.58<br>0.89           | -1.68<br>-1.12       | 0.51<br>2.91  | 0.29                 | 0.66 LC/MS Pos Early | 1600 181.072        | 5429 83-67-0        | C07480 |
| theophylline                                       | Xenobiotics            | Xanthine Metabolism                                        | Below median<br>Above median                 | -0.58<br>-1.43          | -2.39<br>-4.74          | 1.23<br>1.89         | 0.53         | 0.83                 | -0.31<br>0.91           | -1.41<br>-1.12       | 0.80<br>2.93  | 0.59                 | 0.83 LC/MS Neg       | 2356.9 179.057      | 2153 58-55-9        | C07130 |
| thymol sulfate                                     | Xenobiotics            | Food Component/Plant                                       | Below median<br>Above median                 | 0.47<br>-1.50           | -1.45<br>-4.85          | 2.38<br>1.86         | 0.63         | 0.87                 | 0.33<br>0.85            | -0.84<br>-1.20       | 1.50<br>2.89  | 0.58                 | 0.83 LC/MS Neg       | 4410 229.054        | 89-83-8             | C09908 |
| undecenoylcarnitine (C11:1)                        | Lipid                  | Fatty Acid Metabolism (Acyl Carnitine, Monounsaturated)    | Below median<br>Above median                 | -1.35<br>-1.20          | -3.31<br>-4.51          | 0.61<br>2.12         | 0.18         | 0.52                 | -0.14<br>0.95           | -1.33<br>-1.07       | 1.06<br>2.98  | 0.82                 | 0.93 LC/MS Pos Late  | 1100 328.248        |                     |        |
| valerate (5:0)                                     | Lipid                  | Short Chain Fatty Acid                                     | Below median<br>Above median                 | 0.08<br>-1.36           | -1.78<br>-4.68          | 1.94<br>1.96         | 0.93         | 0.97                 | 0.39<br>0.99            | -0.74<br>-1.04       | 1.53<br>3.01  | 0.50                 | 0.80 LC/MS Neg       | 1718 101.061        | 7991 109-52-4       | C00803 |
| valylglycine                                       | Peptide                | Dipeptide                                                  | Below median<br>Above median                 | -1.21<br>-1.08          | -3.04<br>-4.42          | 0.62<br>2.25         | 0.19         | 0.55                 | -0.52<br>1.06           | -1.63<br>-0.98       | 0.60<br>3.10  | 0.37                 | 0.71 LC/MS Neg       | 1506 173.093        | 136487 686-43-1     |        |
| X - 11381                                          |                        |                                                            | Below median<br>Above median                 | 0.20<br>-1.40           | -1.65<br>-4.72          | 2.05<br>1.92         | 0.83         | 0.94                 | -0.13<br>0.95           | -1.25<br>-1.07       | 1.00<br>2.98  | 0.82                 | 0.93 LC/MS Pos Early | 2331 186.112        |                     |        |
| X - 11407                                          |                        |                                                            | Below median<br>Above median                 | -1.10<br>-0.68          | -3.18<br>-4.24          | 0.97<br>2.88         | 0.30         | 0.66                 | -1.10<br>1.63           | -2.36<br>-0.54       | 0.16<br>3.79  | 0.09                 | 0.43 LC/MS Neg       | 2108 186.113        |                     |        |
| X - 11852                                          |                        |                                                            | Below median<br>Above median                 | 1.80<br>-1.72           | -0.03<br>-5.03          | 3.62<br>1.60         | 0.05         | 0.33                 | 0.57<br>0.83            | -0.55<br>-1.20       | 1.68<br>2.86  | 0.32                 | 0.68 LC/MS Neg       | 3277.6 232.995      |                     |        |
| X - 12007                                          |                        |                                                            | Below median<br>Above median                 | -0.25<br>-1.30          | -2.06<br>-4.65          | 1.56<br>2.06         | 0.78         | 0.92                 | -0.11<br>0.97           | -1.22<br>-1.08       | 0.99<br>3.01  | 0.84                 | 0.93 LC/MS Neg       | 1357 222.992        |                     |        |
| X - 12306                                          |                        |                                                            | Below median<br>Above median                 | -1.35<br>-1.32          | -3.18<br>-4.62          | 0.47<br>1.99         | 0.15         | 0.48                 | -0.82<br>0.97           | -1.93<br>-1.05       | 0.29<br>2.99  | 0.15                 | 0.54 LC/MS Neg       | 2350 247.028        |                     |        |
| X - 12726                                          |                        |                                                            | Below median<br>Above median                 | -1.25<br>-1.17          | -3.15<br>-4.49          | 0.64<br>2.15         | 0.19         | 0.55                 | -0.69<br>1.05           | -1.85<br>-0.98       | 0.46<br>3.07  | 0.24                 | 0.64 LC/MS Neg       | 1942 233.013        |                     |        |
| X - 12798                                          |                        |                                                            | Below median<br>Above median                 | -0.24<br>-1.37          | -2.04<br>-4.68          | 1.55<br>1.95         | 0.79         | 0.92                 | 0.01<br>0.94            | -1.08<br>-1.09       | 1.11<br>2.96  | 0.98                 | 0.99 LC/MS Pos Early | 2011 240.102        |                     |        |
| X - 12812                                          |                        |                                                            | Below median<br>Above median                 | -0.10<br>-1.40          | -1.94<br>-4.73          | 1.74<br>1.94         | 0.91         | 0.96                 | -0.41<br>0.84           | -1.53<br>-1.19       | 0.71<br>2.88  | 0.47                 | 0.79 LC/MS Neg       | 2435 208.062        |                     |        |
| X - 12818                                          |                        |                                                            | Below median<br>Above median                 | -0.03<br>-1.38          | -1.87<br>-4.75          | 1.80<br>1.98         | 0.97         | 0.99                 | 0.26<br>1.02            | -0.86<br>-1.03       | 1.38<br>3.07  | 0.65                 | 0.87 LC/MS Neg       | 2695 263.023        |                     |        |
| X - 12849                                          |                        |                                                            | Below median<br>Above median                 | -2.14<br>-2.16          | -4.04<br>-5.53          | -0.23<br>1.21        | 0.03         | 0.26                 | -1.01<br>0.56           | -2.17<br>-1.50       | 0.16<br>2.62  | 0.09                 | 0.43 LC/MS Neg       | 4696 331.176        |                     |        |
| X - 12851                                          |                        |                                                            | Below median<br>Above median                 | 1.37<br>-1.64           | -0.40<br>-4.96          | 3.14<br>1.69         | 0.13         | 0.47                 | 0.36<br>0.87            | -0.72<br>-1.16       | 1.44<br>2.90  | 0.52                 | 0.81 LC/MS Neg       | 4844 311.666        |                     |        |
| X - 12906                                          |                        |                                                            | Below median<br>Above median                 | -1.68<br>-1.28          | -3.56<br>-4.58          | 0.19<br>2.03         | 0.08         | 0.37                 | -0.80<br>0.98           | -1.94<br>-1.04       | 0.35<br>3.00  | 0.17                 | 0.56 LC/MS Neg       | 793 158.046         |                     |        |
| X - 13729                                          |                        |                                                            | Below median<br>Above median                 | 0.70<br>-1.39           | -1.07<br>-4.70          | 2.46<br>1.92         | 0.44         | 0.75                 | -0.11<br>0.94           | -1.19<br>-1.08       | 0.97<br>2.96  | 0.84                 | 0.93 LC/MS Neg       | 1745 241.977        |                     |        |
| X - 14904                                          |                        |                                                            | Below median<br>Above median                 | -0.47<br>-1.02          | -2.42<br>-4.64          | 1.48<br>2.60         | 0.64         | 0.87                 | -0.74<br>1.49           | -1.92<br>-0.72       | 0.45<br>3.69  | 0.22                 | 0.63 LC/MS Neg       | 4543 329.234        |                     |        |
| X - 15245                                          |                        |                                                            | Below median<br>Above median                 | -1.21<br>-1.69          | -3.00<br>-5.03          | 0.57<br>1.65         | 0.18         | 0.53                 | 0.09<br>0.96            | -1.01<br>-1.08       | 1.18<br>3.00  | 0.88                 | 0.95 LC/MS Neg       | 568 233.03          |                     |        |
| X - 16087                                          |                        |                                                            | Below median<br>Above median                 | -0.90<br>-1.68          | -2.74<br>-5.05          | 0.94<br>1.69         | 0.34         | 0.69                 | -0.75<br>0.68           | -1.87<br>-1.37       | 0.38<br>2.73  | 0.19                 | 0.58 LC/MS Neg       | 4143 443.157        |                     |        |
| X - 17301                                          |                        |                                                            | Below median<br>Above median                 | -1.64<br>-1.10          | -3.48<br>-4.42          | 0.20<br>2.21         | 0.08         | 0.37                 | -0.69<br>1.05           | -1.82<br>-0.98       | 0.44<br>3.07  | 0.23                 | 0.63 LC/MS Pos Early | 2911 179.118        |                     |        |
| X - 17325                                          |                        |                                                            | Below median<br>Above median                 | -1.76<br>-1.57          | -3.59<br>-4.88          | 0.77<br>1.73         | 0.06         | 0.33                 | -0.65<br>0.86           | -1.77<br>-1.16       | 0.46<br>2.88  | 0.25                 | 0.65 LC/MS Neg       | 2868 184.098        |                     |        |
| X - 17367                                          |                        |                                                            | Below median<br>Above median                 | -1.36<br>-1.52          | -3.16<br>-4.84          | 0.44<br>1.79         | 0.14         | 0.48                 | -0.50<br>0.88           | -1.60<br>-1.14       | 0.60<br>2.90  | 0.37                 | 0.71 LC/MS Neg       | 2710 182.083        |                     |        |
| X - 17612                                          |                        |                                                            | Below median<br>Above median                 | 0.82<br>-1.37           | -1.04<br>-4.68          | 2.68<br>1.94         | 0.38         | 0.71                 | -0.27<br>0.93           | -1.41<br>-1.09       | 0.86<br>2.95  | 0.64                 | 0.86 LC/MS Neg       | 4308 567.319        |                     |        |
| X - 17653                                          |                        |                                                            | Below median<br>Above median                 | -0.49<br>-1.34          | -2.28<br>-4.65          | 1.29<br>1.98         | 0.59         | 0.85                 | -0.26<br>0.96           | -1.35<br>-1.07       | 0.82<br>2.98  | 0.63                 | 0.86 LC/MS Neg       | 5128 365.269        |                     |        |
| X - 17654                                          |                        |                                                            | Below median<br>Above median                 | -0.18<br>-1.36          | -2.02<br>-4.68          | 1.66<br>1.95         | 0.85         | 0.95                 | -0.85<br>0.99           | -1.96<br>-1.03       | 0.27<br>3.00  | 0.14                 | 0.52 LC/MS Neg       | 5200 365.269        |                     |        |
| X - 17676                                          |                        |                                                            | Below median<br>Above median                 | 1.58<br>-1.80           | -0.35<br>-5.14          | 3.50<br>1.55         | 0.11         | 0.42                 | 0.24<br>0.87            | -0.94<br>-1.17       | 1.42<br>2.92  | 0.69                 | 0.88 LC/MS Neg       | 1485 167.047        |                     |        |
| X - 17686                                          |                        |                                                            | Below median<br>Above median                 | -1.35<br>-1.18          | -3.12<br>-4.50          | 0.42<br>2.13         | 0.13         | 0.47                 | -1.05<br>1.08           | -2.13<br>-0.94       | 0.03<br>3.10  | 0.06                 | 0.34 LC/MS Neg       | 2614 259.028        |                     |        |
| X - 17690                                          |                        |                                                            | Below median<br>Above median                 | -0.24<br>-1.33          | -2.02<br>-4.66          | 1.54<br>2.01         | 0.79         | 0.92                 | 0.69<br>0.80            | -0.39<br>-1.23       | 1.78<br>2.83  | 0.21                 | 0.60 LC/MS Neg       | 2904 245.049        |                     |        |
| X - 21661                                          |                        |                                                            | Below median<br>Above median                 | -1.90<br>-1.95          | -3.86<br>-5.30          | 0.05<br>1.40         | 0.06         | 0.33                 | -1.62<br>0.45           | -2.80<br>-1.59       | -0.43<br>2.48 | 0.01                 | 0.13 LC/MS Neg       | 3034 259.009        |                     |        |
| X - 23648                                          |                        |                                                            |                                              |                         |                         |                      |              |                      |                         |                      |               |                      |                      |                     |                     |        |

|                                               |                        |                                     |        |        |       |      |      |        |        |       |      |      |                 |        |         |    |           |                     |                      |
|-----------------------------------------------|------------------------|-------------------------------------|--------|--------|-------|------|------|--------|--------|-------|------|------|-----------------|--------|---------|----|-----------|---------------------|----------------------|
| glycosyl ceramide (d18:1/20:0, d16:1/22:0)*   | Lipid                  | Hexosylceramides (HCER)             | -0.70  | -4.05  | 2.66  | 0.68 | 0.89 | 0.79   | -1.26  | 2.83  | 0.45 | 0.77 | LC/MS Pos Late  | 3414   | 756.635 | NA |           |                     |                      |
| glycosyl-N-behenoyl-sphingadine (d18:2/22:0)* | Lipid                  | Hexosylceramides (HCER)             | 0.12   | -3.14  | 3.38  | 0.94 | 0.97 | 0.62   | -1.37  | 2.60  | 0.54 | 0.82 | LC/MS Pos Late  | 3420   | 782.65  | NA |           |                     |                      |
| heme                                          | Cofactors and Vitamins | Hemoglobin and Porphyrin Metabolism | -1.52  | -5.13  | 2.09  | 0.41 | 0.72 | -0.55  | -2.75  | 1.65  | 0.62 | 0.85 | LC/MS Pos Late  | 1124   | 616.176 |    | 26945     | 14875-96-8          | C00032               |
| HEPES                                         | Xenobiotics            | Chemical                            | -10.41 | -41.02 | 20.20 | 0.50 | 0.81 | -11.37 | -30.02 | 7.28  | 0.23 | 0.63 | LC/MS Neg       | 1022   | 237.091 |    | 23831     | 7365-45-9           |                      |
| hydroxycotinine                               | Xenobiotics            | Tobacco Metabolite                  | 1.07   | -2.23  | 4.36  | 0.52 | 0.83 | 0.60   | -1.41  | 2.61  | 0.56 | 0.83 | LC/MS Pos Early | 2030   | 193.097 |    | 10219774  | 34834-67-8          |                      |
| ibuprofen                                     | Xenobiotics            | Drug - Analgesics, Anesthetics      | 3.72   | -4.68  | 12.11 | 0.39 | 0.71 | 2.65   | -2.47  | 7.77  | 0.31 | 0.68 | LC/MS Neg       | 4925   | 205.123 |    | 3672      | 15687-27-1          | D00126               |
| indoleacetylserine*                           | Amino Acid             | Tryptophan Metabolism               | -0.08  | -3.19  | 3.03  | 0.96 | 0.98 | -0.06  | -1.95  | 1.84  | 0.95 | 0.98 | LC/MS Pos Early | 3114   | 319.165 | NA |           |                     |                      |
| indoleacetylglutamine                         | Amino Acid             | Tryptophan Metabolism               | -0.28  | -3.34  | 2.78  | 0.86 | 0.95 | -0.13  | -2.00  | 1.74  | 0.89 | 0.95 | LC/MS Neg       | 2535   | 302.115 |    | 25200879  |                     |                      |
| isoleucylglycine                              | Peptide                | Dipeptide                           | -3.15  | -6.22  | -0.07 | 0.05 | 0.30 | -1.84  | -3.71  | 0.04  | 0.06 | 0.34 | LC/MS Neg       | 1992   | 187.109 |    | 342532    | 868-28-0            |                      |
| isoursodeoxycholate sulfate (1)               | Xenobiotics            | Secondary Bile Acid Metabolism      | -1.22  | -4.25  | 1.80  | 0.43 | 0.74 | -0.20  | -2.05  | 1.64  | 0.83 | 0.93 | LC/MS Neg       | 4095   | 471.242 | NA |           |                     |                      |
| maltol sulfate                                | Xenobiotics            | Food Component/Plant                | -1.44  | -4.63  | 1.74  | 0.37 | 0.71 | 0.29   | -1.65  | 2.23  | 0.77 | 0.90 | LC/MS Neg       | 1544   | 204.982 | NA |           |                     |                      |
| metformin                                     | Xenobiotics            | Drug - Metabolic                    | 5.73   | -9.59  | 21.05 | 0.46 | 0.77 | -1.26  | -10.60 | 8.09  | 0.79 | 0.92 | LC/MS Pos Early | 2817   | 130.109 |    | 4091      | 1115-70-4           | C07151               |
| metronidazole                                 | Xenobiotics            | Drug - Antibiotic                   | -0.50  | -5.34  | 4.35  | 0.84 | 0.94 | -0.20  | -3.16  | 2.75  | 0.89 | 0.95 | LC/MS Pos Early | 2046   | 172.072 |    | 4173      | 73334-05-1          | D00409               |
| N-(2-furoyl)glycine                           | Xenobiotics            | Food Component/Plant                | -0.11  | -3.11  | 2.89  | 0.94 | 0.97 | 0.91   | -0.91  | 2.74  | 0.33 | 0.69 | LC/MS Neg       | 1525   | 168.03  |    | 21863     | 5657-19-2;5657-19-2 |                      |
| N4-acetyl-5-hydroxysulfamethoxazole*          | Xenobiotics            | Drug - Antibiotic                   | 14.05  | -16.71 | 44.81 | 0.37 | 0.71 | -0.24  | -19.02 | 18.54 | 0.98 | 0.99 | LC/MS Neg       | 1745   | 310.05  | NA |           |                     |                      |
| N4-acetylsulfamethoxazole*                    | Xenobiotics            | Drug - Antibiotic                   | -4.63  | -13.04 | 3.78  | 0.28 | 0.63 | -2.22  | -7.35  | 2.92  | 0.40 | 0.74 | LC/MS Neg       | 2489   | 294.055 |    | 65280     |                     | C13061,D01601        |
| N-acetylkynurenine (2)                        | Amino Acid             | Tryptophan Metabolism               | 0.57   | -2.43  | 3.58  | 0.71 | 0.91 | 0.35   | -1.49  | 2.18  | 0.71 | 0.88 | LC/MS Neg       | 2378   | 249.088 | NA |           |                     |                      |
| naproxen                                      | Xenobiotics            | Drug - Analgesics, Anesthetics      | 0.58   | -20.99 | 22.15 | 0.96 | 0.98 | -11.50 | -24.61 | 1.61  | 0.09 | 0.43 | LC/MS Neg       | 4155   | 229.087 |    | 156391    | 22204-53-1          | C01517               |
| paraxanthine                                  | Xenobiotics            | Xanthine Metabolism                 | -1.28  | -4.26  | 1.69  | 0.40 | 0.71 | -0.87  | -2.68  | 0.95  | 0.35 | 0.70 | LC/MS Neg       | 2279   | 179.057 |    | 4687      | 611-59-6            | C13747               |
| phenylacetylcarnitine                         | Peptide                | Acetylated Peptides                 | 0.74   | -2.28  | 3.75  | 0.63 | 0.87 | 0.42   | -1.42  | 2.26  | 0.65 | 0.87 | LC/MS Pos Early | 3092   | 280.154 |    | 101724840 | 287108-21-8         |                      |
| phenylalanylalanine                           | Peptide                | Dipeptide                           | -4.51  | -7.47  | -1.54 | 0.00 | 0.10 | -2.01  | -3.83  | -0.19 | 0.03 | 0.26 | LC/MS Pos Early | 2909   | 237.123 |    | 5488196   | 3918-87-4           |                      |
| piperine                                      | Xenobiotics            | Food Component/Plant                | 1.63   | -2.44  | 5.71  | 0.43 | 0.74 | -0.22  | -2.71  | 2.27  | 0.86 | 0.94 | LC/MS Pos Late  | 1168   | 286.144 |    | 638024    | 94-62-2             | C03882               |
| propyl 4-hydroxybenzoate sulfate              | Xenobiotics            | Benzoate Metabolism                 | -0.75  | -3.79  | 2.29  | 0.63 | 0.87 | 0.76   | -1.09  | 2.62  | 0.42 | 0.75 | LC/MS Neg       | 3971   | 259.028 | NA |           | 162338-10-5         |                      |
| pyrraline                                     | Xenobiotics            | Food Component/Plant                | -1.52  | -4.66  | 1.62  | 0.34 | 0.69 | -1.17  | -3.09  | 0.75  | 0.23 | 0.63 | LC/MS Neg       | 2304   | 253.119 |    | 122228    | 74509-14-1          |                      |
| ranitidine                                    | Xenobiotics            | Drug - Gastrointestinal             | -19.09 | -41.07 | 2.88  | 0.09 | 0.38 | -6.13  | -19.57 | 7.31  | 0.37 | 0.71 | LC/MS Pos Early | 2910   | 315.149 |    | 3001055   | 66357-59-3          | D00422               |
| ranitidine N-oxide*                           | Xenobiotics            | Drug - Gastrointestinal             | -19.09 | -41.07 | 2.88  | 0.09 | 0.38 | -6.13  | -19.57 | 7.31  | 0.37 | 0.71 | LC/MS Pos Early | 2926   | 311.143 |    | 3033888   |                     |                      |
| saccharin                                     | Xenobiotics            | Food Component/Plant                | 0.51   | -2.58  | 3.60  | 0.74 | 0.91 | 0.07   | -1.81  | 1.96  | 0.94 | 0.97 | LC/MS Neg       | 2000   | 181.992 |    | 5143      | 81-07-2             | D01085               |
| salicylic glucuronide*                        | Xenobiotics            | Drug - Analgesics, Anesthetics      | -1.82  | -5.61  | 1.97  | 0.35 | 0.69 | -0.25  | -2.56  | 2.06  | 0.83 | 0.93 | LC/MS Neg       | 1463   | 370.078 | NA |           |                     |                      |
| sulfamethoxazole                              | Xenobiotics            | Drug - Antibiotic                   | -1.04  | -10.46 | 8.37  | 0.83 | 0.94 | -1.59  | -7.33  | 4.16  | 0.59 | 0.83 | LC/MS Neg       | 1941   | 252.045 |    | 5329      |                     | D00285,C07315,D00447 |
| sulfate of piperine metabolite C16H19NO3 (3)* | Xenobiotics            | Food Component/Plant                | 3.08   | -0.04  | 6.21  | 0.05 | 0.33 | 0.14   | -1.77  | 2.06  | 0.89 | 0.95 | LC/MS Neg       | 4200   | 352.086 | NA |           |                     |                      |
| sulfate of piperine metabolite C18H21NO3 (3)* | Xenobiotics            | Food Component/Plant                | 2.40   | -0.85  | 5.65  | 0.15 | 0.48 | -0.43  | -2.41  | 1.56  | 0.67 | 0.87 | LC/MS Neg       | 4630   | 378.102 | NA |           |                     |                      |
| syringol sulfate                              | Xenobiotics            | Food Component/Plant                | -0.61  | -3.82  | 2.59  | 0.71 | 0.91 | 0.74   | -1.21  | 2.70  | 0.46 | 0.77 | LC/MS Neg       | 2395   | 233.013 | NA |           | 52904-67-3          |                      |
| taurodeoxycholic acid 3-sulfate               | Lipid                  | Secondary Bile Acid Metabolism      | 1.53   | -1.48  | 4.53  | 0.32 | 0.68 | -0.48  | -2.31  | 1.36  | 0.61 | 0.85 | LC/MS Neg       | 4855   | 288.62  | NA |           |                     |                      |
| taurohyocholate*                              | Lipid                  | Secondary Bile Acid Metabolism      | -5.48  | -10.32 | -0.64 | 0.03 | 0.26 | -1.82  | -4.78  | 1.14  | 0.23 | 0.63 | LC/MS Neg       | 5000   | 514.284 | NA |           |                     |                      |
| taurosodeoxycholate                           | Lipid                  | Secondary Bile Acid Metabolism      | -1.01  | -3.93  | 1.91  | 0.50 | 0.80 | -0.62  | -2.41  | 1.16  | 0.49 | 0.80 | LC/MS Neg       | 5025   | 498.289 |    | 9848818   | 14605-22-2          |                      |
| theanine                                      | Xenobiotics            | Food Component/Plant                | -0.21  | -3.75  | 3.33  | 0.91 | 0.96 | 1.10   | -1.06  | 3.25  | 0.32 | 0.68 | LC/MS Pos Early | 2180   | 175.108 |    | 439378    | 3081-61-6           | C01047               |
| umbelliferone sulfate                         | Xenobiotics            | Food Component/Plant                | -1.47  | -4.44  | 1.50  | 0.33 | 0.68 | 0.39   | -1.42  | 2.21  | 0.67 | 0.87 | LC/MS Neg       | 2440   | 240.981 |    | 129659    | 69526-88-1          |                      |
| vanillic alcohol sulfate                      | Amino Acid             | Tyrosine Metabolism                 | -1.07  | -4.15  | 2.01  | 0.49 | 0.80 | 0.58   | -1.29  | 2.46  | 0.54 | 0.82 | LC/MS Neg       | 1808   | 233.013 | NA |           | 754920-02-0         |                      |
| X - 12013                                     |                        |                                     | 0.96   | -2.16  | 4.09  | 0.54 | 0.83 | 0.66   | -1.25  | 2.56  | 0.50 | 0.80 | LC/MS Neg       | 2066   | 242.013 | NA |           |                     |                      |
| X - 12111                                     |                        |                                     | -1.23  | -4.30  | 1.83  | 0.43 | 0.74 | -1.49  | -3.36  | 0.37  | 0.12 | 0.48 | LC/MS Neg       | 877    | 142.051 | NA |           |                     |                      |
| X - 12221                                     |                        |                                     | 0.83   | -2.28  | 3.94  | 0.80 | 0.86 | 0.41   | -1.49  | 2.31  | 0.67 | 0.87 | LC/MS Neg       | 1467   | 203.998 | NA |           |                     |                      |
| X - 12261                                     |                        |                                     | -0.27  | -4.64  | 4.10  | 0.90 | 0.96 | -1.96  | -4.62  | 0.70  | 0.15 | 0.54 | LC/MS Neg       | 1853   | 258.008 | NA |           |                     |                      |
| X - 12407                                     |                        |                                     | 1.26   | -4.16  | 6.69  | 0.65 | 0.88 | 0.64   | -2.67  | 3.95  | 0.70 | 0.88 | LC/MS Neg       | 1873   | 204.981 | NA |           |                     |                      |
| X - 12543                                     |                        |                                     | -1.49  | -4.92  | 1.94  | 0.39 | 0.71 | -0.84  | -2.93  | 1.25  | 0.43 | 0.76 | LC/MS Neg       | 1409   | 181.051 | NA |           |                     |                      |
| X - 12544                                     |                        |                                     | 1.09   | -2.32  | 4.51  | 0.53 | 0.83 | -0.20  | -2.29  | 1.88  | 0.85 | 0.93 | LC/MS Neg       | 3166.9 | 209.082 | NA |           |                     |                      |
| X - 12730                                     |                        |                                     | -0.12  | -3.40  | 3.16  | 0.94 | 0.97 | 1.75   | -0.25  | 3.74  | 0.09 | 0.43 | LC/MS Neg       | 2048   | 203.997 | NA |           |                     |                      |
| X - 12738                                     |                        |                                     | 0.04   | -3.41  | 3.49  | 0.98 | 0.99 | 0.42   | -1.68  | 2.52  | 0.70 | 0.88 | LC/MS Neg       | 2389   | 230.997 | NA |           |                     |                      |
| X - 12830                                     |                        |                                     | 1.05   | -3.14  | 5.25  | 0.62 | 0.87 | 0.95   | -1.61  | 3.50  | 0.47 | 0.78 | LC/MS Neg       | 3197   | 372.113 | NA |           |                     |                      |
| X - 13726                                     |                        |                                     | 2.34   | -3.21  | 7.88  | 0.41 | 0.72 | 0.51   | -2.87  | 3.90  | 0.77 | 0.90 | LC/MS Neg       | 1532   | 379.035 | NA |           |                     |                      |
| X - 17343                                     |                        |                                     | -0.29  | -4.31  | 3.73  | 0.89 | 0.96 | 2.54   | 0.10   | 4.98  | 0.04 | 0.30 | LC/MS Neg       | 1326   | 190.966 | NA |           |                     |                      |
| X - 17655                                     |                        |                                     | -2.33  | -5.39  | 0.73  | 0.14 | 0.47 | -1.17  | -3.03  | 0.70  | 0.22 | 0.62 | LC/MS Neg       | 4169   | 421.061 | NA |           |                     |                      |
| X - 17673                                     |                        |                                     | -1.16  | -4.31  | 1.99  | 0.47 | 0.78 | -0.03  | -1.95  | 1.89  | 0.97 | 0.99 | LC/MS Neg       | 1294   | 148.973 | NA |           |                     |                      |
| X - 19183                                     |                        |                                     | -0.58  | -3.68  | 2.52  | 0.71 | 0.91 | -0.50  | -2.39  | 1.39  | 0.61 | 0.85 | LC/MS Neg       | 1665   | 230.05  | NA |           |                     |                      |
| X - 19438                                     |                        |                                     | 0.43   | -2.59  | 3.45  | 0.78 | 0.92 | 0.98   | -0.86  | 2.82  | 0.29 | 0.66 | LC/MS Neg       | 1209   | 217.072 | NA |           |                     |                      |
| X - 21788                                     |                        |                                     | -1.24  | -4.23  | 1.75  | 0.42 | 0.73 | -0.47  | -2.29  | 1.36  | 0.62 | 0.85 | LC/MS Neg       | 1165   | 180.034 | NA |           |                     |                      |
| X - 21807                                     |                        |                                     | -0.30  | -3.54  | 2.94  | 0.86 | 0.95 | 0.81   | -1.16  | 2.78  | 0.42 | 0.75 | LC/MS Neg       | 2335   | 233.014 | NA |           |                     |                      |
| X - 22509                                     |                        |                                     | -1.18  | -4.90  | 2.54  | 0.53 | 0.83 | -0.02  | -2.29  | 2.25  | 0.99 | 0.99 | LC/MS Neg       | 3562   | 473.146 | NA |           |                     |                      |
| X - 22520                                     |                        |                                     | -1.92  | -4.89  | 1.05  | 0.20 | 0.55 | -1.50  | -3.31  | 0.30  | 0.10 | 0.46 | LC/MS Neg       | 4389   | 263.628 | NA |           |                     |                      |
| X - 23583                                     |                        |                                     | 1.13   | -1.90  | 4.17  | 0.46 | 0.77 | 0.23   | -1.62  | 2.09  | 0.80 | 0.92 | LC/MS Pos Early | 1112   | 116.071 | NA |           |                     |                      |
| X - 23662                                     |                        |                                     | 0.82   | -2.57  | 4.22  | 0.63 | 0.87 | 0.70   | -1.37  | 2.77  | 0.51 | 0.81 | LC/MS Pos Early | 2622   | 159.149 | NA |           |                     |                      |
| X - 24295                                     |                        |                                     | -0.63  | -3.62  | 2.35  | 0.68 | 0.89 | 0.06   | -1.76  | 1.88  | 0.95 | 0.98 | LC/MS Neg       | 1152   | 217.071 | NA |           |                     |                      |
| X - 24344                                     |                        |                                     | -0.01  | -3.10  | 3.07  | 0.99 | 1.00 | -0.14  | -2.02  | 1.75  | 0.89 | 0.95 | LC/MS Neg       | 3620   | 217.017 | NA |           |                     |                      |
| X - 2521                                      |                        |                                     |        |        |       |      |      |        |        |       |      |      |                 |        |         |    |           |                     |                      |

**Table S15. Metabolic pathway not associated with systolic (SBP) or diastolic blood pressure (DBP)**

|                                                         | SBP |    |                   |          |          | DBP |                   |          |          |
|---------------------------------------------------------|-----|----|-------------------|----------|----------|-----|-------------------|----------|----------|
|                                                         | m*  | k* | Enrichment score* | p-value† | q-value† | k*  | Enrichment score* | p-value† | q-value† |
| Benzoate Metabolism                                     | 30  | 0  | --                | --       | --       | 1   | 0.77              | 1        | 1        |
| Dihydrosphingomyelins                                   | 5   | 0  | --                | --       | --       | 1   | 4.73              | 0.198    | 0.337    |
| Dipeptide                                               | 14  | 1  | 1.93              | 0.418    | 0.496    | 0   | --                | --       | --       |
| Fatty Acid Metabolism (Acyl Carnitine, Monounsaturated) | 9   | 0  | --                | --       | --       | 2   | 5.38              | 0.054    | 0.131    |
| Fatty Acid Metabolism (Acyl Carnitine, Short Chain)     | 1   | 1  | 27.36             | 0.038    | 0.103    | 0   | --                | --       | --       |
| Fatty Acid Metabolism (Acyl Glycine)                    | 5   | 1  | 5.45              | 0.175    | 0.277    | 0   | --                | --       | --       |
| Histidine Metabolism                                    | 16  | 0  | --                | --       | --       | 1   | 1.46              | 0.509    | 0.577    |
| Long Chain Monounsaturated Fatty Acid                   | 7   | 0  | --                | --       | --       | 1   | 3.37              | 0.266    | 0.348    |
| Long Chain Polyunsaturated Fatty Acid (n3 and n6)       | 16  | 2  | 3.47              | 0.119    | 0.270    | 2   | 3.00              | 0.149    | 0.317    |
| Long Chain Saturated Fatty Acid                         | 7   | 0  | --                | --       | --       | 1   | 3.37              | 0.266    | 0.348    |
| Lysophospholipid                                        | 27  | 0  | --                | --       | --       | 1   | 0.85              | 1        | 1        |
| Medium Chain Fatty Acid                                 | 11  | 0  | --                | --       | --       | 1   | 2.14              | 0.386    | 0.469    |
| Methionine, Cysteine, SAM and Taurine Metabolism        | 22  | 1  | 1.21              | 0.574    | 0.574    | 0   | --                | --       | --       |
| Pantothenate and CoA Metabolism                         | 1   | 1  | 27.36             | 0.038    | 0.103    | 0   | --                | --       | --       |
| Partially Characterized Molecule                        | 17  | 1  | 1.58              | 0.482    | 0.539    | 0   | --                | --       | --       |
| Purine Metabolism, Adenine containing                   | 5   | 1  | 5.45              | 0.175    | 0.277    | 0   | --                | --       | --       |
| Purine Metabolism, Guanine containing                   | 4   | 1  | 6.82              | 0.142    | 0.270    | 0   | --                | --       | --       |
| Sterol                                                  | 7   | 1  | 3.88              | 0.236    | 0.320    | 1   | 3.37              | 0.266    | 0.348    |
| Urea cycle; Arginine and Proline Metabolism             | 21  | 1  | 1.27              | 0.557    | 0.574    | 0   | --                | --       | --       |
| Vitamin A Metabolism                                    | 4   | 1  | 6.82              | 0.142    | 0.270    | 0   | --                | --       | --       |

\* Enrichment score was calculated using  $(k/m)/[(n-k)/(N-m)]$ , where k is the number of metabolites associated with SBP or DBP in the pathway (false discovery rate adjusted p-value in linear regression Model 1 <0.05), m is the total number of tested metabolites in the pathway, n is the total number of known metabolites associated with SBP (n=34) or DBP (n=39), and N is the total number of known metabolites (N=904).

† P-value for each pathway was calculated using Fisher's exact test and false discovery rate adjusted (q-value) across eligible pathways (i.e., containing at least one metabolite associated with SBP or DBP).

**Table S16. Characteristics of the sub-sample (n=355)**

|                                                                         |                 |
|-------------------------------------------------------------------------|-----------------|
| Age, years                                                              | 51.7 (9.0)      |
| Women, n (%)                                                            | 214 (60.3%)     |
| Systolic blood pressure (SBP), mmHg                                     | 123.5 (16.7)    |
| Diastolic blood pressure (DBP), mmHg                                    | 79.8 (9.9)      |
| Hypertension (self-reported or SBP/DBP $\geq$ 140/90 mmHg)              | 86 (24.2%)      |
| Body mass index (BMI), kg/m <sup>2</sup>                                | 23.8 (3.1)      |
| Estimated glomerular filtration rate (eGFR)*, mL/min/1.73m <sup>2</sup> | 76.7 (13.5)     |
| Low-density lipoprotein cholesterol, mg/dL                              | 123.9 (31.8)    |
| Hunan province, n (%)                                                   | 234 (65.9%)     |
| Urbanization index <sup>†</sup>                                         | 72.2 (14.5)     |
| Per capita household income <sup>‡</sup> , 1000 yuan                    | 16.7 (19.3)     |
| Completed high school education, n (%)                                  | 308 (32.1%)     |
| Total energy <sup>§</sup> , kcal                                        | 1885.9 (621.1)  |
| Animal-source food consumption <sup>§</sup> , %kcal                     | 23.9 (16.3)     |
| Sodium consumption <sup>§</sup> , mg                                    | 3696.9 (2276.8) |
| Physical activity <sup>  </sup> , METS/week                             | 98.4 (171.0)    |
| Ever smoking, n (%)                                                     | 138 (38.9%)     |
| Drank alcohol last year, n (%)                                          | 88 (24.8%)      |

Mean (SD) or n (%) as noted. For income, physical activity, animal-source food consumption, and sodium consumption, median (interquartile range) are presented.

\* eGFR was calculated based on the Chronic Kidney Disease Epidemiology Collaboration (CKD-EPI) equation.

<sup>†</sup> Urbanization index encompasses 12 components of urbanization, including population density, sanitation, and health infrastructure.

<sup>‡</sup> Per capita household income was estimated by dividing the total household income by the number of household members.

<sup>§</sup> Dietary intakes were measured by 3-consecutive 24h dietary recalls and household food inventories.

<sup>||</sup> Physical activity was estimated by 7-day physical activity (occupational, transportation, domestic, and leisure activities) recalls in METS.

**Table S17. Association between the forth principal coordinate of the gut microbiota and individual metabolites associated with systolic or diastolic blood pressure**

| Metabolites                                                                       | Class                  | Pathway                                                      | Model 1 |        |         |              | Model 2 |        |         |         | Platform | RI    | Mass            | PUBCHEM | CAS            | KEGG     |            |                |      |           |    |             |
|-----------------------------------------------------------------------------------|------------------------|--------------------------------------------------------------|---------|--------|---------|--------------|---------|--------|---------|---------|----------|-------|-----------------|---------|----------------|----------|------------|----------------|------|-----------|----|-------------|
|                                                                                   |                        |                                                              | Coef.   | 95% CI | p-value | q-value      | Coef.   | 95% CI | p-value | q-value |          |       |                 |         |                |          |            |                |      |           |    |             |
| <b>Metabolites with ≤25% values below detection limits</b>                        |                        |                                                              |         |        |         |              |         |        |         |         |          |       |                 |         |                |          |            |                |      |           |    |             |
| tricosanoyl sphingomyelin (d18:1/23:0)*                                           | Lipid                  | Sphingomyelins                                               | -0.003  | -0.008 | 0.003   | 0.316        | 0.642   | -0.003 | -0.009  | 0.002   | 0.275    | 0.616 | LC/MS Pos Late  | 3200    | 801.68441      | NA       |            |                |      |           |    |             |
| lignoceroyl sphingomyelin (d18:1/24:0)                                            | Lipid                  | Sphingomyelins                                               | 0.000   | -0.005 | 0.005   | 0.918        | 0.935   | 0.000  | -0.005  | 0.005   | 0.884    | 0.936 | LC/MS Pos Late  | 3437    | 815.70006      | NA       | 60037-60-7 |                |      |           |    |             |
| palmitoylcarnitine (C16)                                                          | Lipid                  | Fatty Acid Metabolism (Acyl Carnitine, Long Chain Saturated) | 0.004   | -0.001 | 0.010   | 0.127        | 0.596   | 0.004  | -0.001  | 0.010   | 0.129    | 0.615 | LC/MS Pos Late  | 1425    | 400.34214      | 461      | 6865-14-1  | C02990         |      |           |    |             |
| 1-myristoyl-2-arachidonoyl-GPC (14:0/20:4)*                                       | Lipid                  | Phosphatidylcholine (PC)                                     | 0.001   | -0.002 | 0.005   | 0.428        | 0.642   | 0.001  | -0.002  | 0.005   | 0.450    | 0.668 | LC/MS Pos Late  | 1914    | 754.53813      | NA       |            |                |      |           |    |             |
| sphingomyelin (d18:2/24:2)*                                                       | Lipid                  | Sphingomyelins                                               | -0.003  | -0.007 | 0.001   | 0.152        | 0.596   | -0.003 | -0.007  | 0.001   | 0.153    | 0.615 | LC/MS Pos Late  | 2215    | 809.65308      | NA       |            |                |      |           |    |             |
| 1-palmitoyl-2-linoleoyl-GPI (16:0/18:2)                                           | Lipid                  | Phosphatidylinositol (PI)                                    | 0.007   | 0.002  | 0.012   | 0.005        | 0.270   | 0.007  | 0.002   | 0.012   | 0.006    | 0.324 | LC/MS Polar     | 910     | 833.51845      | NA       |            |                |      |           |    |             |
| 1-palmitoyl-2-arachidonoyl-GPC (16:0/20:4n6)                                      | Lipid                  | Phosphatidylcholine (PC)                                     | 0.003   | -0.004 | 0.010   | 0.371        | 0.642   | 0.003  | -0.004  | 0.010   | 0.386    | 0.662 | LC/MS Pos Late  | 2091    | 782.26425      | 10747814 | 35418-58-7 |                |      |           |    |             |
| 1-palmitoyl-2-arachidonoyl-GPI (16:0/20:4)*                                       | Lipid                  | Phosphatidylinositol (PI)                                    | 0.004   | -0.001 | 0.008   | 0.097        | 0.596   | 0.004  | -0.001  | 0.008   | 0.101    | 0.615 | LC/MS Polar     | 892     | 857.51855      | NA       |            |                |      |           |    |             |
| sphingomyelin (d18:1/21:0, d17:1/22:0, d16:1/23:0)*                               | Lipid                  | Sphingomyelins                                               | -0.001  | -0.007 | 0.004   | 0.598        | 0.778   | -0.002 | -0.007  | 0.004   | 0.525    | 0.709 | LC/MS Pos Late  | 2793    | 732.65311      | NA       |            |                |      |           |    |             |
| behenoyl sphingomyelin (d18:1/22:0)*                                              | Lipid                  | Sphingomyelins                                               | -0.001  | -0.007 | 0.006   | 0.833        | 0.900   | -0.001 | -0.008  | 0.006   | 0.782    | 0.845 | LC/MS Pos Late  | 3083    | 787.66876      | NA       |            |                |      |           |    |             |
| sphingomyelin (d18:1/14:0, d16:1/16:0)*                                           | Lipid                  | Sphingomyelins                                               | 0.000   | -0.006 | 0.007   | 0.910        | 0.935   | 0.000  | -0.007  | 0.007   | 0.965    | 0.983 | LC/MS Pos Late  | 1998    | 675.54355      | 11433862 |            |                |      |           |    |             |
| cerotylcarnitine (C26)*                                                           | Lipid                  | Fatty Acid Metabolism (Acyl Carnitine, Long Chain Saturated) | 0.003   | -0.001 | 0.007   | 0.200        | 0.596   | 0.003  | -0.001  | 0.007   | 0.205    | 0.615 | LC/MS Pos Late  | 1649    | 540.49864      | NA       |            |                |      |           |    |             |
| pantothenate (Vitamin B5)                                                         | Cofactors and Vitamins | Pantothenate and CoA Metabolism                              | 0.002   | -0.006 | 0.009   | 0.673        | 0.778   | 0.001  | -0.006  | 0.009   | 0.691    | 0.794 | LC/MS Neg       | 14987   | 218.10339      | 6613     | 137-08-6   | C00864         |      |           |    |             |
| N2,N2-dimethylguanosine                                                           | Nucleotide             | Purine Metabolism, Guanine containing                        | 0.004   | -0.004 | 0.013   | 0.327        | 0.642   | 0.004  | -0.004  | 0.013   | 0.337    | 0.662 | LC/MS Pos Early | 2210    | 312.13025      | 92919    | 2140-67-2  |                |      |           |    |             |
| cholesterol                                                                       | Lipid                  | Sterol                                                       | -0.002  | -0.010 | 0.006   | 0.645        | 0.778   | -0.002 | -0.010  | 0.006   | 0.627    | 0.770 | LC/MS Pos Late  | 2707    | 369.35159      | 11025495 | 57-88-5    | C00187         |      |           |    |             |
| sphingomyelin (d18:2/14:0, d18:1/14:1)*                                           | Lipid                  | Sphingomyelins                                               | -0.002  | -0.007 | 0.004   | 0.508        | 0.710   | -0.002 | -0.008  | 0.004   | 0.458    | 0.668 | LC/MS Pos Late  | 1860    | 673.5279       | NA       |            |                |      |           |    |             |
| adrenate (22:4n6)                                                                 | Lipid                  | Long Chain Polyunsaturated Fatty Acid (n3 and n6)            | 0.002   | -0.001 | 0.005   | 0.209        | 0.596   | 0.002  | -0.001  | 0.005   | 0.215    | 0.615 | LC/MS Neg       | 5678    | 331.26425      | 5497181  | 2091-25-0  | C16527         |      |           |    |             |
| 1-palmitoleoylglycerol (16:1)*                                                    | Lipid                  | Monoacylglycerol                                             | 0.002   | 0.000  | 0.004   | 0.094        | 0.596   | 0.002  | 0.000   | 0.004   | 0.097    | 0.615 | LC/MS Neg       | 6094    | 253.21727      | NA       |            |                |      |           |    |             |
| 1-palmitoyl-2-palmitoleoyl-GPC (16:0/16:1)*                                       | Lipid                  | Phosphatidylcholine (PC)                                     | 0.002   | -0.001 | 0.006   | 0.210        | 0.596   | 0.002  | -0.001  | 0.006   | 0.219    | 0.615 | LC/MS Pos Late  | 2160    | 732.55378      | NA       |            |                |      |           |    |             |
| myristoylcarnitine (C14)                                                          | Lipid                  | Fatty Acid Metabolism (Acyl Carnitine, Long Chain Saturated) | -0.002  | -0.005 | 0.001   | 0.279        | 0.628   | -0.002 | -0.005  | 0.001   | 0.285    | 0.616 | LC/MS Pos Late  | 1350    | 372.31084      | 6426854  | 18822-89-4 |                |      |           |    |             |
| tatty acid (1)*                                                                   | Molecules              | Partially Characterized Molecules                            | 0.001   | -0.001 | 0.004   | 0.323        | 0.642   | 0.001  | -0.001  | 0.004   | 0.326    | 0.662 | LC/MS Neg       | 4807    | 169.12303      | NA       |            |                |      |           |    |             |
| sphingomyelin (d18:2/16:0, d18:1/16:1)*                                           | Lipid                  | Sphingomyelins                                               | -0.003  | -0.011 | 0.006   | 0.513        | 0.710   | -0.003 | -0.012  | 0.005   | 0.478    | 0.679 | LC/MS Pos Late  | 2002    | 701.5592       | NA       |            |                |      |           |    |             |
| picolinoylglycine                                                                 | Lipid                  | Fatty Acid Metabolism (Acyl Glycine)                         | 0.002   | -0.001 | 0.006   | 0.135        | 0.596   | 0.003  | -0.001  | 0.006   | 0.140    | 0.615 | LC/MS Neg       | 1829    | 179.00464      | NA       |            |                |      |           |    |             |
| N6-carbamoylthreonyladenosine                                                     | Nucleotide             | Purine Metabolism, Adenine containing                        | 0.004   | -0.003 | 0.010   | 0.253        | 0.596   | 0.004  | -0.003  | 0.010   | 0.260    | 0.615 | LC/MS Neg       | 2164    | 411.12698      | 161466   | 24719-82-2 |                |      |           |    |             |
| dihomolinolenate (20:3n3 or 3n6)                                                  | Lipid                  | Long Chain Polyunsaturated Fatty Acid (n3 and n6)            | 0.002   | -0.002 | 0.006   | 0.360        | 0.642   | 0.002  | -0.002  | 0.006   | 0.373    | 0.662 | LC/MS Neg       | 5596    | 305.2486       | 5280581  | 17046-59-2 | C03242         |      |           |    |             |
| 1-stearoyl-2-arachidonoyl-GPC (18:0/20:4)                                         | Lipid                  | Phosphatidylcholine (PC)                                     | 0.000   | -0.006 | 0.007   | 0.892        | 0.935   | 0.000  | -0.006  | 0.007   | 0.923    | 0.959 | LC/MS Pos Late  | 2300    | 810.60074      | 16219824 | 35418-59-8 |                |      |           |    |             |
| acetylcarnitine (C2)                                                              | Lipid                  | Fatty Acid Metabolism (Acyl Carnitine, Short Chain)          | 0.003   | -0.004 | 0.009   | 0.425        | 0.642   | 0.003  | -0.004  | 0.010   | 0.412    | 0.662 | LC/MS Pos Early | 2282    | 204.12304      | 1        | 5080-50-2  | C02571         |      |           |    |             |
| retinol (Vitamin A)                                                               | Cofactors and Vitamins | Vitamin A Metabolism                                         | 0.004   | -0.001 | 0.010   | 0.105        | 0.596   | 0.004  | -0.001  | 0.010   | 0.109    | 0.615 | LC/MS Pos Late  | 1636    | 269.22639      | 445354   | 68-26-8    | C00473         |      |           |    |             |
| arginate*                                                                         | Amino Acid             | Urea cycle; Arginine and Proline Metabolism                  | 0.002   | -0.002 | 0.006   | 0.238        | 0.596   | 0.002  | -0.002  | 0.007   | 0.248    | 0.615 | LC/MS Pos Early | 2150    | 170.10297      | 160437   | 157-07-3   |                |      |           |    |             |
| 2,3-dihydroxy-5-methylthio-4-pentenoate (DMTPA)*                                  | Amino Acid             | Methionine, Cysteine, SAM and Taurine Metabolism             | 0.005   | -0.003 | 0.013   | 0.241        | 0.596   | 0.005  | -0.003  | 0.013   | 0.252    | 0.615 | LC/MS Neg       | 1156    | 177.0227       | NA       |            |                |      |           |    |             |
| laurylcarnitine (C12)                                                             | Lipid                  | Fatty Acid Metabolism (Acyl Carnitine, Medium Chain)         | -0.001  | -0.003 | 0.001   | 0.401        | 0.642   | -0.001 | -0.003  | 0.001   | 0.411    | 0.662 | LC/MS Pos Late  | 1235    | 344.27954      | 10427569 | 25518-54-1 |                |      |           |    |             |
| corticosterone                                                                    | Lipid                  | Corticosteroids                                              | 0.000   | -0.002 | 0.001   | 0.649        | 0.778   | 0.000  | -0.002  | 0.001   | 0.678    | 0.794 | LC/MS Neg       | 5040    | 345.20713      | 5753     | 50-22-6    | C02140         |      |           |    |             |
| cortolone glucuronide (1)                                                         | Lipid                  | Corticosteroids                                              | -0.001  | -0.004 | 0.002   | 0.635        | 0.778   | -0.001 | -0.004  | 0.002   | 0.579    | 0.755 | LC/MS Neg       | 4606    | 541.26594      | NA       |            |                |      |           |    |             |
| behenoyl dihydrosphingomyelin (d18:0/22:0)*                                       | Lipid                  | Dihydrosphingomyelins                                        | -0.001  | -0.003 | 0.002   | 0.675        | 0.778   | -0.001 | -0.004  | 0.002   | 0.587    | 0.755 | LC/MS Pos Late  | 3150    | 789.68441      | NA       |            |                |      |           |    |             |
| cis-4-decenoylcarnitine (C10:1)                                                   | Lipid                  | Fatty Acid Metabolism (Acyl Carnitine, Monounsaturated)      | 0.000   | -0.002 | 0.003   | 0.677        | 0.778   | 0.000  | -0.002  | 0.003   | 0.671    | 0.794 | LC/MS Pos Late  | 1057    | 314.23259      | NA       | 98930-66-6 |                |      |           |    |             |
| linoleate (18:2n6)                                                                | Lipid                  | Long Chain Polyunsaturated Fatty Acid (n3 and n6)            | 0.002   | -0.002 | 0.006   | 0.425        | 0.642   | 0.002  | -0.002  | 0.006   | 0.429    | 0.662 | LC/MS Neg       | 5535    | 279.23295      | 5280450  | 60-33-3    | C01595         |      |           |    |             |
| decanoylcarnitine (C10)                                                           | Lipid                  | Fatty Acid Metabolism (Acyl Carnitine, Medium Chain)         | -0.001  | -0.003 | 0.001   | 0.421        | 0.642   | -0.001 | -0.003  | 0.001   | 0.429    | 0.662 | LC/MS Pos Late  | 1130    | 316.24824      | 10245190 | 1492-27-9  |                |      |           |    |             |
| palmitate (16:0)                                                                  | Lipid                  | Long Chain Saturated Fatty Acid                              | 0.002   | -0.003 | 0.008   | 0.375        | 0.642   | 0.002  | -0.003  | 0.008   | 0.382    | 0.662 | LC/MS Neg       | 5618    | 255.23295      | 985      | 57-10-3    | C00249         |      |           |    |             |
| cis-4-decenoate                                                                   | Lipid                  | Medium Chain Fatty Acid                                      | 0.000   | -0.003 | 0.004   | 0.785        | 0.865   | 0.000  | -0.003  | 0.004   | 0.781    | 0.845 | LC/MS Neg       | 4886    | 169.12304      | NA       |            |                |      |           |    |             |
| 5-dodecenoylcarnitine (C12:1)                                                     | Lipid                  | Fatty Acid Metabolism (Acyl Carnitine, Monounsaturated)      | -0.001  | -0.003 | 0.001   | 0.254        | 0.596   | -0.001 | -0.003  | 0.001   | 0.262    | 0.615 | LC/MS Pos Late  | 1135    | 342.26389      | NA       |            |                |      |           |    |             |
| 1-dihomo-linoleoylglycerol (20:2)                                                 | Lipid                  | Monoacylglycerol                                             | 0.002   | 0.000  | 0.004   | 0.099        | 0.596   | 0.002  | 0.000   | 0.004   | 0.103    | 0.615 | LC/MS Neg       | 6800    | 307.26423      | NA       |            |                |      |           |    |             |
| octanoylcarnitine (C8)                                                            | Lipid                  | Fatty Acid Metabolism (Acyl Carnitine, Medium Chain)         | -0.001  | -0.003 | 0.002   | 0.699        | 0.786   | -0.001 | -0.003  | 0.002   | 0.711    | 0.800 | LC/MS Pos Late  | 950     | 288.21694      | 123701   | 3671-77-0  | C02838         |      |           |    |             |
| 1-linoleoylglycerol (18:2)                                                        | Lipid                  | Monoacylglycerol                                             | 0.001   | -0.001 | 0.004   | 0.251        | 0.596   | 0.001  | -0.001  | 0.004   | 0.262    | 0.615 | LC/MS Neg       | 6477    | 279.23293      | 5283469  | 2277-28-3  |                |      |           |    |             |
| 1-dihomo-linolenylglycerol (20:3)                                                 | Lipid                  | Monoacylglycerol                                             | 0.002   | -0.001 | 0.004   | 0.157        | 0.596   | 0.002  | -0.001  | 0.004   | 0.163    | 0.615 | LC/MS Neg       | 6400    | 305.24858      | NA       |            |                |      |           |    |             |
| tetrahydrocortisone glucuronide (5)                                               | Lipids                 | Corticosteroids                                              | -0.002  | -0.004 | 0.001   | 0.229        | 0.596   | -0.002 | -0.005  | 0.001   | 0.201    | 0.615 | LC/MS Neg       | 4697    | 539.25002      | NA       |            |                |      |           |    |             |
| hexanoylcarnitine (C6)                                                            | Lipid                  | Fatty Acid Metabolism (Acyl Carnitine, Medium Chain)         | 0.001   | -0.002 | 0.004   | 0.506        | 0.710   | 0.001  | -0.002  | 0.004   | 0.496    | 0.687 | LC/MS Pos Early | 3358    | 260.18564      | 6426853  | 6920-35-0  |                |      |           |    |             |
| 1-arachidonoyl-GPI* (20:4)*                                                       | Lipid                  | Lysophospholipid                                             | 0.000   | -0.006 | 0.006   | 0.985        | 0.985   | 0.000  | -0.006  | 0.006   | 0.995    | 0.995 | LC/MS Neg       | 5482    | 619.28888      | NA       |            |                |      |           |    |             |
| 2-palmitoleoylglycerol (16:1)*                                                    | Lipid                  | Monoacylglycerol                                             | 0.001   | -0.001 | 0.003   | 0.152        | 0.596   | 0.001  | -0.001  | 0.003   | 0.158    | 0.615 | LC/MS Neg       | 6016    | 253.21727      | NA       |            |                |      |           |    |             |
| hydantoin-5-propionate                                                            | Amino Acid             | Histidine Metabolism                                         | -0.003  | -0.005 | 0.000   | 0.038        | 0.596   | -0.003 | -0.005  | 0.000   | 0.037    | 0.615 | LC/MS Polar     | 2080    | 171.04113      | 782      | 5624-26-0  | C05565         |      |           |    |             |
| p-cresol sulfate                                                                  | Xenobiotics            | Benzate Metabolism                                           | -0.002  | -0.004 | 0.000   | 0.016        | 0.432   | -0.002 | -0.004  | 0.000   | 0.017    | 0.459 | LC/MS Neg       | 2890    | 187.00705      | 4615423  | 3233-57-7  |                |      |           |    |             |
| palmitoleate (16:1n7)                                                             | Lipid                  | Long Chain Monounsaturated Fatty Acid                        | 0.001   | -0.002 | 0.004   | 0.375        | 0.642   | 0.001  | -0.002  | 0.004   | 0.375    | 0.662 | LC/MS Neg       | 5475    | 253.2173       | 445638   | 373-49-9   | C08362         |      |           |    |             |
| <b>Metabolites with 25-50% values below detection limits (BLD), reference=BLD</b> |                        |                                                              |         |        |         |              |         |        |         |         |          |       |                 |         |                |          |            |                |      |           |    |             |
| linoleoyl-linoleoyl-glycerol (18:2/18:2) [1]*                                     | Lipid                  | Diacylglycerol                                               |         |        |         | Below median |         | 0.005  | -0.002  | 0.012   |          |       | 0.118           | 0.615   | LC/MS Pos Late | 2720     | 634.54051  | NA             |      |           |    |             |
| linoleoyl-linoleoyl-glycerol (18:2/18:2) [1]*                                     | Lipid                  | Diacylglycerol                                               |         |        |         | Above median |         | -0.001 | -0.008  | 0.006   |          |       |                 |         |                |          |            |                |      |           |    |             |
| oleoyl-linoleoyl-glycerol (18:1/18:2) [2]                                         | Lipid                  | Diacylglycerol                                               |         |        |         | Below median |         | 0.003  | -0.004  | 0.010   | 0.631    | 0.778 | 0.00322         | -0.004  | 0.01           | 0.626    | 0.7695     | LC/MS Pos Late | 3223 | 636.55616 | NA | 104346-53-4 |
| oleoyl-linoleoyl-glycerol (18:1/18:2) [2]                                         | Lipid                  | Diacylglycerol                                               |         |        |         | Above median |         | 0.001  | -0.006  | 0.008   |          |       | 0.001           | -0.006  | 0.009          |          |            |                |      |           |    |             |
| <b>Metabolites with &gt;50% values BLD, reference=BLD</b>                         |                        |                                                              |         |        |         |              |         |        |         |         |          |       |                 |         |                |          |            |                |      |           |    |             |
| phenylalanylalanine                                                               | Peptide</              |                                                              |         |        |         |              |         |        |         |         |          |       |                 |         |                |          |            |                |      |           |    |             |

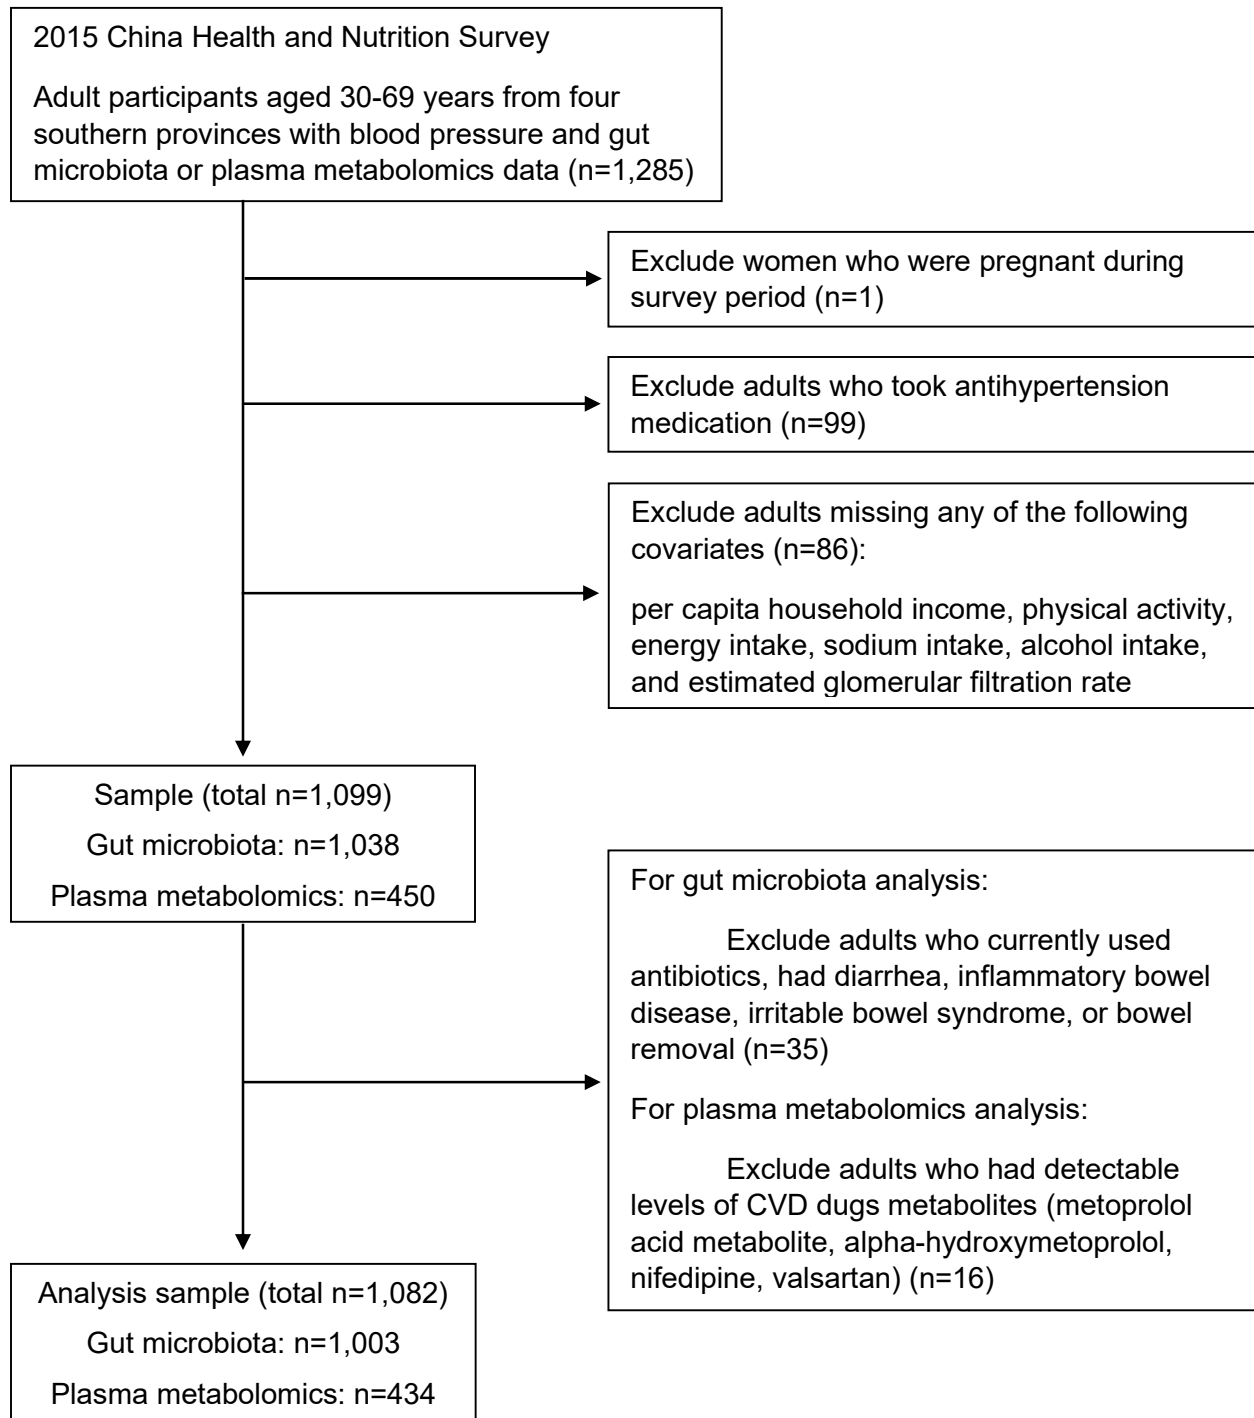

**Figure S1. Sample flow chart.**



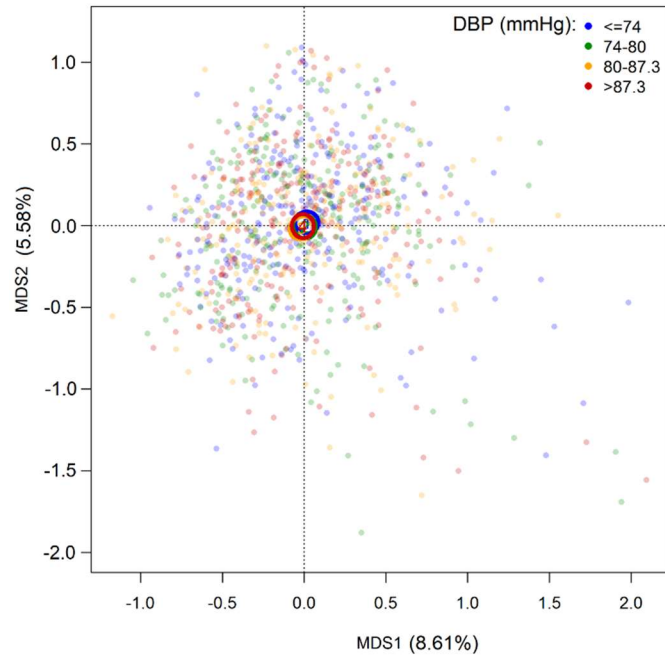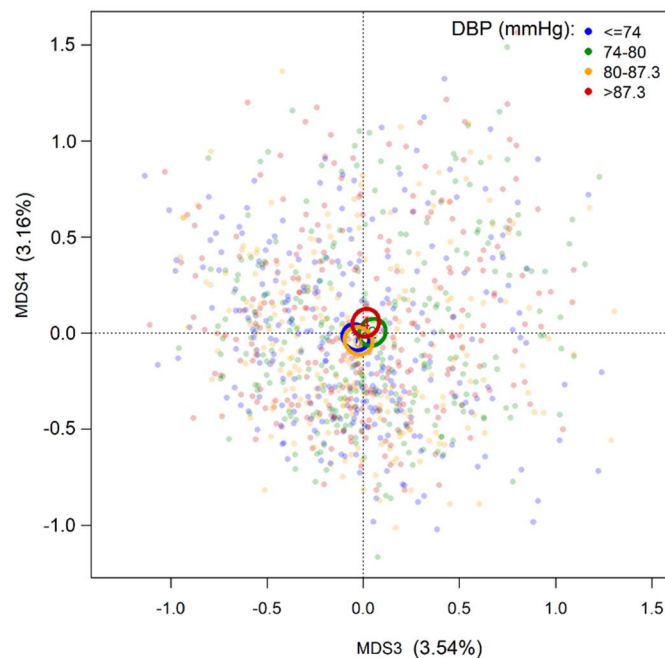

**Figure S2. Microbial between-person diversity ( $\beta$ -diversity) assessed using principal coordinate analysis (PCoA) by diastolic blood pressure (DBP)**

MDS, multidimensional scaling. Centroids illustrate the 95% CI for the mean location of each DBP quartile. In permutational multivariate analysis of variance (PERMANOVA), DBP had  $R^2$  of 0.14% and p-value of 0.026 in Model 1 and 0.046 in Model 2. Model 1 was adjusted for age, sex, provinces, urbanization index (tertiles:  $\leq 64.2$ , 64.2-81.5,  $> 81.5$ ), per-capita household income (tertiles:  $\leq 10$ , 10-21.6,  $> 21.6$ ), education, total energy intake, animal-source food, sodium, physical activity (tertiles:  $\leq 57.4$ , 57.4-152,  $> 152$ ), smoking, alcohol, and estimated glomerular filtration rate. Model 2 was additionally adjusted for BMI.

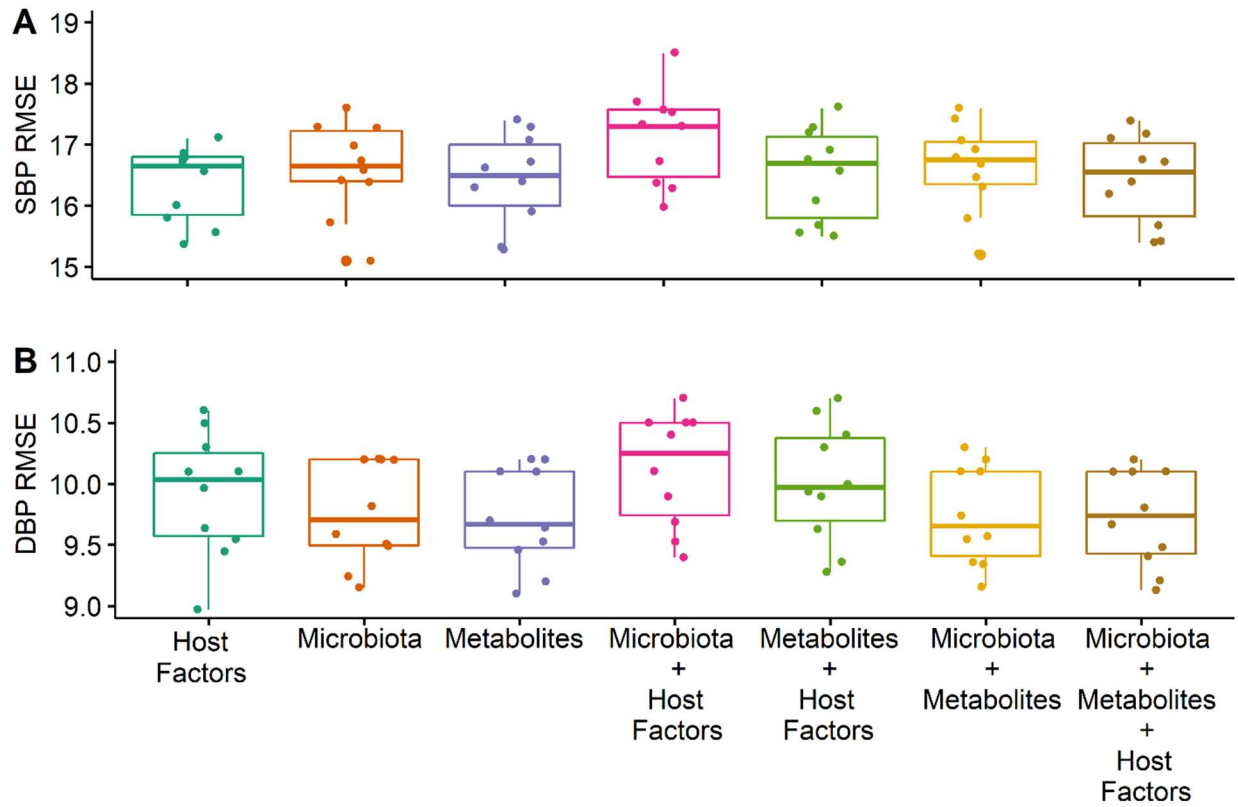

**Figure S3. Root mean square errors (RMSE) for (A) systolic blood pressure (SBP) and (B) diastolic blood pressure (DBP) estimated by random forest regression with 5 iterations of 2-fold cross-validation (5x2cv).**

N=434. X axis shows the data input in each random forest regression. Host factor data included age, sex, provinces, batch, urbanization index, per capita household income, education, total energy intake, animal-source food consumption, sodium consumption, physical activity, smoking, alcohol intake, and estimated glomerular filtration rate (eGFR). Microbiota data included all 1,008 taxa. Metabolite data included all 1,104 metabolites.
